# Supplementary material for: Galactose oxidase oxidation and glycosidase digestion for glycoRNA analysis
Source: Royal Society of Chemistry journal article supplement (doi:10.1039/d4ay02046d), 2024-12-30
Supplement: d4ay02046d1.pdf [file d4ay02046d1.pdf]

## Galactose Oxidase Oxidation and Glycosidase Digestion for GlycoRNA Analysis

Jianbo Deng<sup>1,2,7</sup>, Xinyu Miao<sup>1,7</sup>, Xiaotong Wang<sup>1,3</sup>, Sheng-Ye Wen<sup>1</sup>, Zeyang Zhou<sup>1,2</sup>, Shuwei Li<sup>4</sup>,  
Junhong Jiang<sup>5\*</sup>, Xiaodong Yang<sup>2\*</sup>, Shuang Yang<sup>1,5,6\*</sup>

<sup>1</sup> Center for Clinical Mass Spectrometry, College of Pharmaceutical Sciences, Soochow University, Suzhou, 215123, China

<sup>2</sup> Department of General Surgery, The Second Affiliated Hospital of Soochow University, Suzhou, Jiangsu 215004, China

<sup>3</sup> Department of Hepatology and Gastroenterology, The Affiliated Infectious Hospital of Soochow University, Suzhou 215004, China

<sup>4</sup> Nanjing Apollomics Biotech, Inc., Nanjing, Jiangsu 210033, China

<sup>5</sup> Department of Respiratory Medicine, The Fourth Affiliated Hospital of Soochow University, Suzhou, Jiangsu 215123, China

<sup>6</sup> Health Management Center, The Second Affiliated Hospital of Soochow University, Suzhou, Jiangsu 215004, China

<sup>7</sup> These authors contribute equally to this work.

\*Address any correspondence to

Dr. Shuang Yang, yangs2020@suda.edu.cn

Dr. Xiaodong Yang, yangxiaodong2366@suda.edu.cn

Dr. Junhong Jiang, jiangjunhong1969@suda.edu.cn

## Contents

|                                                                                                                                 |    |
|---------------------------------------------------------------------------------------------------------------------------------|----|
| <b>Experiments and Data Analysis</b> .....                                                                                      | 3  |
| <b>Comprehensive Workflow for Small RNA Sequences</b> .....                                                                     | 3  |
| <b>Raw RNA-seq Data Processing</b> .....                                                                                        | 3  |
| <b>Small RNA Identification</b> .....                                                                                           | 3  |
| <b>Supplementary Tables</b> .....                                                                                               | 4  |
| <b>Table S1. The list of identified glycosylated miRNAs from colon tissue.</b> .....                                            | 4  |
| <b>Table S2. The list o</b> .....                                                                                               | 8  |
| <b>Table S3. The list of identified glycosylated snoRNA in paracancerous tissue (PCA)<br/>    and cancer tissue (CA).</b> ..... | 79 |

## **Experiments and Data Analysis**

**Comprehensive Workflow for Small RNA Sequences.** Sequence small RNAs using the Illumina HiSeq or MGISEQ-2000 platform with paired-end reads of 150 base pairs (PE150) to generate Illumina NGS data. Analyze GlycoRNA data on Ubuntu 20.04.6 by following this detailed workflow to examine the raw data (Pass Filter Data).

**Raw RNA-seq Data Processing.** Initially, raw sequencing data undergoes quality control and preprocessing using Trimmomatic software (version 0.30). This step eliminates adapter sequences and low-quality reads, resulting in clean data suitable for further analysis. The output is a high-quality dataset devoid of adapter contamination and low-quality sequences, ensuring reliable and accurate downstream analysis.

**Small RNA Identification.** Next, the Rfam database (version 14), containing a comprehensive collection of non-coding RNA family sequences, is downloaded, along with the Homo\_sapiens.GRCh38.ncrna.fa file containing human genomic non-coding RNA data. These resources are combined to create a non-coding RNA database. BLASTN (V2.2.28+) is then used to align the Clean Data with this database, identifying the most optimal matches to classify non-coding miRNAs, tRNAs, and snoRNAs.

## Supplementary Tables

**Table S1. The list of identified glycosylated miRNAs from colon tissue.** The N-glycoRNAs are enriched by SPCgRNA. NT

= Nucleotide Length, TPM = Transcripts Per Million, PCA = Paracancerous Tissue, CA = Cancer Tissue.

| Gene          | NT | PCA-TPM |           |          |          | CA-TPM  |         |          |           |
|---------------|----|---------|-----------|----------|----------|---------|---------|----------|-----------|
|               |    | #1      | #2        | #3       | #4       | #1      | #2      | #3       | #4        |
| let-7a-3p     | 21 | 0       | 6.66      | 40.68    | 0        | 0       | 102.97  | 259.78   | 0         |
| let-7b-5p     | 22 | 0       | 492.74    | 399.61   | 0        | 0       | 289.59  | 116.32   | 0         |
| let-7c-5p     | 22 | 0       | 0         | 31.11    | 0        | 0       | 0       | 0        | 42.18     |
| let-7e-5p     | 22 | 0       | 43.28     | 0        | 0        | 0       | 0       | 0        | 87.37     |
| let-7i-5p     | 22 | 0       | 0         | 1275.4   | 346.39   | 0       | 0       | 639.76   | 2009.53   |
| miR-106a-5p   | 23 | 0       | 0         | 23.93    | 22.71    | 0       | 83.66   | 0        | 0         |
| miR-106b-3p   | 22 | 0       | 0         | 703.5    | 0        | 0       | 0       | 4424.02  | 3136.31   |
| miR-10b-5p    | 23 | 8899.05 | 18990.36  | 82996.74 | 0        | 9103.41 | 7020.95 | 19502.93 | 0         |
| miR-1185-1-3p | 22 | 0       | 0         | 0        | 0        | 0       | 64.35   | 42.65    | 0         |
| miR-125a-5p   | 24 | 335.33  | 542.68    | 0        | 0        | 221.93  | 250.98  | 0        | 0         |
| miR-125b-5p   | 22 | 388.28  | 635.9     | 0        | 0        | 413.4   | 360.38  | 0        | 0         |
| miR-1260b     | 19 | 0       | 0         | 445.07   | 0        | 0       | 1962.78 | 2958.4   | 1021.34   |
| miR-127-5p    | 22 | 892.26  | 1201.88   | 0        | 0        | 857.25  | 572.75  | 0        | 0         |
| miR-1296-5p   | 22 | 213.75  | 236.38    | 0        | 119.25   | 130.55  | 0       | 0        | 34.65     |
| miR-133a-3p   | 22 | 145.11  | 289.65    | 0        | 0        | 87.03   | 96.53   | 0        | 0         |
| miR-135b-3p   | 22 | 0       | 0         | 0        | 0        | 0       | 0       | 263.66   | 149.13    |
| miR-135b-5p   | 23 | 0       | 0         | 0        | 0        | 356.83  | 257.41  | 0        | 0         |
| miR-139-5p    | 23 | 27.45   | 53.27     | 0        | 0        | 0       | 0       | 0        | 0         |
| miR-1-3p      | 22 | 0       | 429.48    | 1634.33  | 0        | 0       | 180.19  | 434.26   | 0         |
| miR-142-3p    | 23 | 0       | 342.92    | 0        | 0        | 0       | 0       | 0        | 213.91    |
| miR-143-3p    | 21 | 0       | 152152.56 | 0        | 64656.45 | 0       | 86265.7 | 0        | 404361.31 |
| miR-143-5p    | 22 | 2910.13 | 2586.87   | 971.51   | 0        | 1740.61 | 1242.02 | 5905.16  | 0         |
| miR-145-3p    | 22 | 302     | 712.47    | 0        | 0        | 161.01  | 173.75  | 0        | 0         |

|             |    |          |           |           |          |           |           |         |           |
|-------------|----|----------|-----------|-----------|----------|-----------|-----------|---------|-----------|
| miR-146a-5p | 22 | 0        | 0         | 983.47    | 0        | 0         | 0         | 407.12  | 735.12    |
| miR-146b-5p | 23 | 0        | 0         | 1579.29   | 164.68   | 1005.2    | 0         | 922.8   | 1465.72   |
| miR-148a-5p | 22 | 878.53   | 0         | 390.04    | 306.64   | 983.45    | 0         | 131.83  | 108.46    |
| miR-149-5p  | 23 | 33.34    | 0         | 21.54     | 0        | 0         | 0         | 0       | 0         |
| miR-15a-5p  | 22 | 0        | 0         | 0         | 0        | 82.68     | 0         | 54.28   | 0         |
| miR-16-5p   | 22 | 115.7    | 143.16    | 1689.37   | 56.79    | 1527.39   | 965.3     | 814.24  | 513.68    |
| miR-17-5p   | 23 | 402.01   | 506.05    | 799.22    | 289.61   | 5474.23   | 3616.66   | 434.26  | 171.73    |
| miR-181a-3p | 22 | 0        | 0         | 23.93     | 28.39    | 0         | 0         | 531.19  | 341.95    |
| miR-181c-3p | 22 | 0        | 0         | 7.18      | 0        | 0         | 0         | 158.97  | 106.95    |
| miR-181d-5p | 23 | 0        | 0         | 0         | 0        | 91.38     | 64.35     | 0       | 0         |
| miR-182-5p  | 24 | 145.11   | 0         | 2002.83   | 130.61   | 1257.59   | 0         | 65.91   | 63.27     |
| miR-183-5p  | 22 | 80.4     | 0         | 478.57    | 0        | 822.44    | 0         | 0       | 0         |
| miR-185-3p  | 22 | 41.18    | 0         | 14.36     | 0        | 21.76     | 0         | 189.99  | 0         |
| miR-186-5p  | 22 | 5930.09  | 6888.33   | 3929.09   | 1993.19  | 6749.23   | 4080      | 2694.74 | 1256.33   |
| miR-188-5p  | 21 | 0        | 0         | 0         | 0        | 43.52     | 51.48     | 0       | 0         |
| miR-18a-5p  | 23 | 21.57    | 39.95     | 0         | 22.71    | 361.18    | 212.37    | 0       | 0         |
| miR-192-3p  | 22 | 0        | 0         | 131.61    | 28.39    | 0         | 0         | 11.63   | 9.04      |
| miR-192-5p  | 21 | 70861    | 154453.11 | 146175.71 | 36791.6  | 78832.4   | 76895.85  | 2113.14 | 2359.01   |
| miR-194-5p  | 22 | 0        | 0         | 14048.55  | 3997.73  | 0         | 0         | 205.5   | 147.63    |
| miR-196b-3p | 22 | 0        | 0         | 4.79      | 0        | 0         | 0         | 209.38  | 170.22    |
| miR-196b-5p | 22 | 0        | 0         | 399.61    | 0        | 0         | 0         | 108.57  | 138.59    |
| miR-19a-3p  | 23 | 94.13    | 83.23     | 105.29    | 34.07    | 0         | 0         | 0       | 0         |
| miR-200a-3p | 22 | 0        | 0         | 10487.95  | 4968.77  | 0         | 0         | 5672.52 | 4347.45   |
| miR-200a-5p | 22 | 0        | 0         | 1067.22   | 982.4    | 0         | 0         | 73.67   | 79.84     |
| miR-200b-5p | 22 | 0        | 0         | 201       | 68.14    | 0         | 0         | 38.77   | 12.05     |
| miR-20a-3p  | 22 | 0        | 0         | 4.79      | 0        | 0         | 0         | 143.46  | 66.28     |
| miR-20a-5p  | 23 | 1543.31  | 1621.37   | 2433.55   | 897.22   | 19003.15  | 10599     | 1178.71 | 445.89    |
| miR-210-3p  | 22 | 531.43   | 945.52    | 0         | 0        | 522.18    | 527.7     | 0       | 0         |
| miR-21-3p   | 21 | 0        | 569.31    | 473.79    | 0        | 0         | 3623.1    | 4776.86 | 0         |
| miR-214-3p  | 22 | 0        | 0         | 71.79     | 0        | 221.93    | 0         | 348.96  | 0         |
| miR-215-5p  | 21 | 0        | 23168.63  | 39278.98  | 6763.2   | 0         | 10895.03  | 488.54  | 497.11    |
| miR-21-5p   | 22 | 33870.52 | 47366.02  | 0         | 23503.69 | 357796.21 | 301328.25 | 0       | 225249.57 |

|              |    |         |           |          |          |          |          |          |          |
|--------------|----|---------|-----------|----------|----------|----------|----------|----------|----------|
| miR-217-5p   | 23 | 0       | 0         | 0        | 0        | 0        | 0        | 65.91    | 54.23    |
| miR-218-5p   | 21 | 0       | 39.95     | 0        | 0        | 0        | 0        | 0        | 78.33    |
| miR-221-5p   | 22 | 0       | 0         | 74.18    | 0        | 174.06   | 0        | 0        | 0        |
| miR-223-3p   | 22 | 19.61   | 0         | 0        | 0        | 461.26   | 315.33   | 0        | 0        |
| miR-224-5p   | 25 | 0       | 0         | 0        | 0        | 369.88   | 373.25   | 0        | 0        |
| miR-23b-3p   | 23 | 0       | 592.62    | 1445.29  | 0        | 0        | 0        | 0        | 0        |
| miR-26a-5p   | 22 | 484.37  | 496.07    | 5587.35  | 0        | 3768.43  | 2844.42  | 3078.59  | 0        |
| miR-26b-5p   | 21 | 15.69   | 33.29     | 220.14   | 0        | 178.41   | 186.62   | 108.57   | 0        |
| miR-27a-3p   | 21 | 1682.54 | 702.48    | 3196.88  | 0        | 14625.51 | 12130.61 | 25291.77 | 0        |
| miR-28-3p    | 22 | 6351.7  | 12082.05  | 0        | 0        | 4978.16  | 5682.4   | 0        | 0        |
| miR-30c-2-3p | 22 | 25.49   | 63.26     | 0        | 0        | 0        | 12.87    | 0        | 0        |
| miR-3158-3p  | 22 | 15.69   | 26.63     | 0        | 0        | 0        | 0        | 0        | 0        |
| miR-320a-3p  | 22 | 0       | 1524.82   | 0        | 0        | 0        | 727.19   | 0        | 772.78   |
| miR-335-3p   | 22 | 41.18   | 19.98     | 0        | 0        | 718      | 405.43   | 0        | 0        |
| miR-362-5p   | 24 | 0       | 0         | 45.46    | 28.39    | 0        | 0        | 0        | 0        |
| miR-374a-3p  | 22 | 86.28   | 116.53    | 0        | 221.47   | 918.17   | 559.87   | 0        | 1840.81  |
| miR-374a-5p  | 22 | 154.92  | 119.85    | 0        | 0        | 1932.08  | 778.68   | 0        | 0        |
| miR-374b-5p  | 22 | 84.32   | 73.24     | 0        | 0        | 818.09   | 398.99   | 0        | 0        |
| miR-375-3p   | 22 | 3086.63 | 12348.39  | 4031.99  | 0        | 1993     | 3719.63  | 1407.47  | 0        |
| miR-378a-3p  | 22 | 87457   | 142154.66 | 48391.03 | 63912.55 | 35055.96 | 35722.56 | 17219.18 | 13018.26 |
| miR-378a-5p  | 22 | 158.84  | 196.43    | 71.79    | 51.11    | 121.84   | 64.35    | 34.9     | 21.09    |
| miR-378d     | 20 | 3374.89 | 5163.75   | 2299.55  | 0        | 0        | 0        | 0        | 0        |
| miR-378i     | 21 | 1537.43 | 2363.81   | 574.29   | 0        | 0        | 0        | 0        | 0        |
| miR-381-3p   | 22 | 4614.25 | 0         | 0        | 3781.94  | 4912.88  | 0        | 0        | 3178.49  |
| miR-382-3p   | 21 | 0       | 0         | 21.54    | 0        | 0        | 77.22    | 178.36   | 0        |
| miR-3913-5p  | 22 | 0       | 53.27     | 31.11    | 0        | 0        | 0        | 0        | 0        |
| miR-3934-5p  | 22 | 17.65   | 29.96     | 0        | 0        | 0        | 0        | 0        | 0        |
| miR-409-5p   | 23 | 0       | 0         | 0        | 0        | 34.81    | 70.79    | 0        | 0        |
| miR-424-5p   | 22 | 0       | 0         | 0        | 0        | 43.52    | 0        | 31.02    | 0        |
| miR-4454     | 20 | 180.41  | 0         | 0        | 0        | 0        | 0        | 616.49   | 224.45   |
| miR-452-5p   | 22 | 0       | 0         | 67       | 0        | 0        | 141.58   | 0        | 46.7     |
| miR-454-3p   | 23 | 0       | 0         | 16.75    | 0        | 39.16    | 0        | 0        | 0        |

|              |    |         |         |         |        |         |         |        |         |
|--------------|----|---------|---------|---------|--------|---------|---------|--------|---------|
| miR-486-5p   | 22 | 125.5   | 0       | 244.07  | 0      | 108.79  | 0       | 104.69 | 0       |
| miR-490-3p   | 22 | 45.1    | 123.18  | 52.64   | 0      | 0       | 0       | 767.71 | 0       |
| miR-503-5p   | 23 | 0       | 0       | 7.18    | 0      | 108.79  | 96.53   | 143.46 | 76.83   |
| miR-542-3p   | 22 | 11.77   | 0       | 0       | 28.39  | 282.85  | 0       | 0      | 593.52  |
| miR-548e-3p  | 22 | 0       | 26.63   | 43.07   | 0      | 0       | 0       | 0      | 0       |
| miR-552-3p   | 21 | 0       | 0       | 52.64   | 141.96 | 0       | 0       | 833.62 | 861.66  |
| miR-584-5p   | 22 | 0       | 0       | 0       | 0      | 73.98   | 70.79   | 0      | 0       |
| miR-652-3p   | 21 | 327.49  | 639.23  | 0       | 0      | 313.31  | 218.8   | 0      | 0       |
| miR-654-3p   | 22 | 0       | 0       | 11.96   | 0      | 78.33   | 0       | 96.93  | 0       |
| miR-6715b-3p | 22 | 17.65   | 46.61   | 0       | 0      | 0       | 0       | 0      | 0       |
| miR-708-3p   | 22 | 0       | 109.87  | 28.71   | 0      | 0       | 0       | 926.68 | 637.2   |
| miR-708-5p   | 23 | 25.49   | 49.94   | 19.14   | 0      | 239.33  | 0       | 286.92 | 159.68  |
| miR-769-5p   | 22 | 2290.46 | 3608.97 | 0       | 0      | 1670.99 | 1969.21 | 0      | 0       |
| miR-889-3p   | 21 | 17.65   | 36.62   | 0       | 0      | 178.41  | 212.37  | 0      | 0       |
| miR-92a-3p   | 22 | 0       | 1408.3  | 0       | 494.04 | 0       | 5663.1  | 0      | 5264.85 |
| miR-93-5p    | 23 | 0       | 0       | 1328.04 | 533.79 | 0       | 0       | 763.83 | 441.37  |
| miR-9983-3p  | 22 | 15.69   | 36.62   | 0       | 0      | 0       | 0       | 0      | 0       |
| miR-99a-5p   | 22 | 119.62  | 169.79  | 0       | 0      | 108.79  | 64.35   | 0      | 0       |

---

**Table S2. The list o identified glycosylated tRNA in paracancerous tissue (PCA) and cancer tissue (CA). (a) N-**

linked glycosylated tRNAs from PCA, (b) N-linked glycosylated tRNAs from CA

(a)

| Qseqid                    | Sseqid                                         | NT | Evalue | Bitscore | Number | Sequence                                                                      |
|---------------------------|------------------------------------------------|----|--------|----------|--------|-------------------------------------------------------------------------------|
| ex3_96<br>6031_x<br>6622  | GL00025<br>3.2/24775<br>9-247830               | 30 | #####  | 60       | ###    | TCCCTGGTGGTCTAGTGGTTAGGATTCGGCGCTCTCACCGCCGCGGCC<br>GGTTTCGATTCCCGGTCAGGGAA   |
| ex3_10<br>82355_<br>x5530 | AF347001<br>.1/16015-<br>15948                 | 20 | #####  | 40.1     | ###    | CAGAGAAUAGUUUAAAUUAGAAUCUUAGCUUUGGGUGCUAAUGGUGGAG<br>UAAAAGACUUUUUCUCUGA      |
| ex3_10<br>98642_<br>x5332 | AC09268<br>6.3/29631<br>-29561                 | 28 | #####  | 56       | ###    | GCAUUGGUGGUUCAGUGGUAGAAUUCUCGCCUGCCACGCGGGAGGCC<br>GGUUCGAUUCGCGCCAAUGCA      |
| ex3_14<br>20023_<br>x3131 | AF347015<br>.1/1604-<br>1672                   | 17 | #####  | 34.2     | ###    | CAGAGUGUAGCUUAAACACAAAGCACCCAACUUACACUUAGGAGAUUUC<br>ACUUAACUUGACCGCUCUGA     |
| ex3_15<br>74449_<br>x2459 | ENST000<br>00387421<br>.1                      | 20 | #####  | 40.1     | ###    | CACTGTAAAGCTAACTTAGCATTAACTTTTAAGTTAAAGATTAAGAGAACC<br>AACACCTC               |
| ex3_16<br>19497_<br>x2305 | CM00067<br>8.2/31915<br>01-<br>3191573         | 35 | #####  | 69.9     | ###    | GCCCGGCTAGCTCAGTCGGTAGAGCATGGGACTCTTAATCTCAGGGTCGT<br>GGTTTCGAGCCCCACGTTGGGCG |
| ex3_17<br>73623_<br>x1843 | CM00066<br>3.2/14830<br>2805-<br>14830273<br>4 | 33 | #####  | 65.9     | ###    | GCCGTGATCGTATAGTGGTTAGTACTCTGCGTTGTGGCCGACGCAACCTC<br>GTTTCGAATCCGAGTCACGGCA  |
| ex3_18<br>13187_<br>x1755 | AC09331<br>1.2/14003<br>6-139968               | 31 | #####  | 61.9     | ###    | GUUCUUGUAGUUGAAUACAACGAUGGUUUUCAUAUCAUUGGUCGUG<br>GUUGUAGUCCGUGCGAGAAUA       |
| ex3_18<br>47796_<br>x1702 | CM00067<br>7.2/26082<br>305-<br>26082234       | 31 | #####  | 61.9     | ###    | TCCCACATGGTCTAGCGGTTAGGATTCCTGGTTTTCCACCCAGGCGGCCCG<br>GTTTCGACTCCCGGTGTGGGAA |

|                           |                                                |    |       |      |     |                                                                              |
|---------------------------|------------------------------------------------|----|-------|------|-----|------------------------------------------------------------------------------|
| ex3_19<br>61494_<br>x1449 | ENST000<br>00387449<br>.1                      | 25 | ##### | 50.1 | ### | GAGAAAGCTCACAGAAGCTGCTAACTCATGCCCCCATGTCTAACAAACATGG<br>CTTTCTCA             |
| ex3_20<br>34089_<br>x1332 | ENST000<br>00387441<br>.1                      | 22 | ##### | 44.1 | ### | GTAAATATAGTTTAAACCAAAACATCAGATTGTGAATCTGACAACAGAGGCTT<br>ACGACCCC            |
| ex3_21<br>07121_<br>x1219 | CM00066<br>3.2/16145<br>0677-<br>16145074<br>7 | 28 | ##### | 56   | ### | GCATGGGTGGTTCAGTGGTAGAATTCTCGCCTGCCACGCGGGAGGCCCG<br>GGTTCGATTCCCGGCCCATGCA  |
| ex3_21<br>96754_<br>x1084 | CM00066<br>3.2/14545<br>9658-<br>14545972<br>9 | 32 | ##### | 63.9 | ### | GGTTCATGGTGTAATGGTGAGCACTCTGGACTCTGAATCCAGCGATCCG<br>AGTTCGAGTCTCGGTGGAACCT  |
| ex3_23<br>46903_<br>x890  | AF382005<br>.1/581-<br>651                     | 30 | ##### | 60   | 890 | GUUUAUGUAGCUUACCUCCUCAAGCAAUACACUGAAAUGUUUAGACG<br>GGCUCACAUACCCCAUAAACA     |
| ex3_25<br>13440_<br>x726  | CM00067<br>5.2/41060<br>809-<br>41060738       | 31 | ##### | 61.9 | 726 | TCCCATATGGTCTAGCGGTTAGGATTCTGGTTTTACCCAGGTGGCCCG<br>GGTTCGACTCCCGGTATGGGAA   |
| ex3_26<br>77903_<br>x595  | CM00066<br>8.2/27295<br>433-<br>27295504       | 20 | ##### | 40.1 | 595 | GGTTCATGGTGTAATGGTTAGCACTCTGGACTCTGAATCCGGTAATCCGA<br>GTTCAAATCTCGGTGGAACCT  |
| ex3_27<br>00757_<br>x576  | AC00844<br>3.10/4259<br>0-42518                | 39 | ##### | 77.8 | 576 | GCCCGGCUAGCUCAGUCGGUAGAGCAUGAGACUCUJAAUCUCAGGGUC<br>GUGGGUUCGAGCCCCACGUUGGCG |
| ex3_27<br>03633_<br>x575  | CM00067<br>6.2/58239<br>967-<br>58239895       | 41 | ##### | 81.8 | 575 | GCCCGGCTAGCTCAGTCGGTAGAGCATGGGACTCTTAATCCAGGGTCGT<br>GGTTCGAGCCCCACGTTGGGCG  |
| ex3_27<br>24618_<br>x560  | CM00066<br>4.2/20261<br>4781-<br>20261471<br>3 | 13 | 0.008 | 26.3 | 560 | AAGAGAGTCATAGAAGTTATGGGATTGGCTTGAAACCAATTTCTGGAAGTT<br>CAATTCCTTCTTTCTTG     |
| ex3_28                    | ENST000                                        | 14 | 0.003 | 28.2 | 481 | AGTAAGGTCAGCTAAATAAGCTATCGGGCCCATACCCCGAAAATGTTGGTT                          |

|        |           |    |       |      |     |                                                     |
|--------|-----------|----|-------|------|-----|-----------------------------------------------------|
| 59322_ | 00387377  |    |       |      |     | ATACCCTTC                                           |
| x481   | .1        |    |       |      |     |                                                     |
| ex3_28 | J01415.2/ | 38 | ##### | 75.8 | 471 | GTAATATAGTTTAAACCAAACATCAGATTGTGAATCTGACAACAGAGGCTT |
| 75035_ | 12138-    |    |       |      |     | ACGACCCCTTATTTACC                                   |
| x471   | 12206     |    |       |      |     |                                                     |
| ex3_28 | GL00025   | 25 | ##### | 50.1 | 466 | GGTTCATGGTGTAATGGTTAGCACTCTGGACTCTGAATCCAGCGATCCG   |
| 84417_ | 6.2/25106 |    |       |      |     | AGTTCAAATCTCGGTGGAACCT                              |
| x466   | 6-250995  |    |       |      |     |                                                     |
| ex3_31 | CM00066   | 20 | ##### | 40.1 | 345 | GGGGATGTAGCTCAGTGGTAGAGCGCATGCTTAGCATGCATGAGGTCCC   |
| 52091_ | 8.2/28658 |    |       |      |     | GGTTTCGATCCCCAGCATCTCCA                             |
| x345   | 308-      |    |       |      |     |                                                     |
|        | 28658237  |    |       |      |     |                                                     |
| ex3_31 | AP00044   | 26 | ##### | 52   | 341 | GCCCGGAUAGCUCAGUCGGUAGAGCAUCAGACUUUUAUCUGAGGGUC     |
| 62391_ | 2.6/2022- |    |       |      |     | CAGGGUUCAAGUCCUGUUCGGGCG                            |
| x341   | 1950      |    |       |      |     |                                                     |
| ex3_31 | CM00066   | 20 | ##### | 40.1 | 333 | GGTTCATGGTGTAATGGTGAGCACTCTGGACTCTGAATCCAGAATCAGC   |
| 77530_ | 5.2/11064 |    |       |      |     | TTAAATTAACCTATACTGTTACTG                            |
| x333   | 0242-     |    |       |      |     |                                                     |
|        | 11064031  |    |       |      |     |                                                     |
|        | 6         |    |       |      |     |                                                     |
| ex3_32 | AC00729   | 38 | ##### | 75.8 | 320 | UCCUCGUUAGUAGUGGUGAGUAUCCCCGCCUGUCACGCGGGAGACC      |
| 08848_ | 8.17/1453 |    |       |      |     | GGGGUUCGAUUCGCCGACGGGGAG                            |
| x320   | 66-       |    |       |      |     |                                                     |
|        | 145295    |    |       |      |     |                                                     |
| ex3_32 | GL00025   | 13 | 0.008 | 26.3 | 297 | GCCTGGATAGCTCAGTTGGTAGAACATCAGACTTTTAATCTGACGGTGCAG |
| 71729_ | 2.2/13342 |    |       |      |     | GGTTCAAGTCCCTGTTTCAGGCG                             |
| x297   | -13414    |    |       |      |     |                                                     |
| ex3_34 | ENST000   | 32 | ##### | 63.9 | 237 | GGTAAATGGCTGAGTGAAGCATTGGACTGTAAATCTAAAGACAGGGGTT   |
| 63015_ | 00387409  |    |       |      |     | AGGCCTCTTT                                          |
| x237   | .1        |    |       |      |     |                                                     |
| ex3_35 | CM00068   | 20 | ##### | 40.1 | 224 | GCCCGGATGATCCTCAGTGGTCTGGGGTGCAGGCTTCAAACCTGTAGCTG  |
| 04270_ | 1.2/45478 |    |       |      |     | TCTAGCGACAGAGTGGTTCAATTCCACCTTTCGGGC                |
| x224   | 687-      |    |       |      |     |                                                     |
|        | 45478602  |    |       |      |     |                                                     |
| ex3_35 | CM00066   | 23 | ##### | 46.1 | 220 | GCTTCTGTAGTGTAGTGGTTATCACGTTTCGCCTCACACGCGAAAGGTCCC |
| 16903_ | 8.2/27280 |    |       |      |     | CGGTTTCGAAACCGGGCAGAAGCA                            |
| x220   | 342-      |    |       |      |     |                                                     |
|        | 27280270  |    |       |      |     |                                                     |
| ex3_35 | ENST000   | 29 | ##### | 58   | 201 | CAGAGAATAGTTTAAATTAGAATCTTAGCTTTGGGTGCTAATGGTGGAGTT |
| 80548_ | 00387461  |    |       |      |     | AAAGACTTT                                           |

|                          |                                          |    |       |      |     |                                                                                |  |
|--------------------------|------------------------------------------|----|-------|------|-----|--------------------------------------------------------------------------------|--|
| x201                     | .2                                       |    |       |      |     |                                                                                |  |
| ex3_36<br>83341_<br>x175 | KI270713.<br>1/31706-<br>31635           | 30 | ##### | 60   | 175 | TCCCTGGTGGTCTAGTGGCTAGGATTCGGCGCTTTCACCGCTGCGGCC<br>GGTTTCGATTCCCGGTCAGGGAA    |  |
| ex3_36<br>95879_<br>x173 | CM00068<br>5.2/18674<br>981-<br>18674909 | 35 | ##### | 69.9 | 173 | GGTTCATAGTGTAGTGGTTATCACGTCTGCTTTACACGCAGAAGGTCCTG<br>GGTTCGAGCCCCAGTGGAAACA   |  |
| ex3_37<br>07043_<br>x171 | AC00644<br>9.19/1968<br>57-<br>196784    | 23 | ##### | 46.1 | 171 | GUCUCUGUGGCGCAAUCGGUUAGCGCGUUCGGCUGUUAACCGAAAGGU<br>UGGUGGUUCGAGCCCACCCAGGGACG |  |
| ex3_37<br>22381_<br>x167 | AC00844<br>3.10/4300<br>6-42934          | 23 | ##### | 46.1 | 167 | GUUUCGUGAGUGUAGUGGUUAUCACGUUCGCCUCACACGCGAAAGGUC<br>CCCGGUUCGAAACCGGGCGGAAACA  |  |
| ex3_37<br>45403_<br>x160 | CM00066<br>8.2/26311<br>267-<br>26311196 | 21 | ##### | 42.1 | 160 | GGCCCCATGGTGTAAATGGTTAGCACTCTGGACTTTGAATCCAGCGATCCG<br>AGTTCAAATCTCGGTGGGACCT  |  |
| ex3_37<br>71530_<br>x154 | AF346992<br>.1/15890-<br>15955           | 29 | ##### | 58   | 154 | GUCCUUGUAGUAUAAACUAAUACACCAGUCUUGUAAACCGGAGAUGAAA<br>ACCUUUUUCCAAGGACA         |  |
| ex3_37<br>83932_<br>x152 | CM00068<br>0.2/46089<br>377-<br>46089305 | 30 | ##### | 60   | 152 | GACGAGCTAGCTCAGTCGGTAGAGCATGGGACTCTTAATCCCAGGGTCGT<br>GGTTTTGAGCCCCATGTTGGCA   |  |
| ex3_37<br>91335_<br>x150 | CM00066<br>4.2/70249<br>061-<br>70248991 | 22 | ##### | 44.1 | 150 | GCGCCGCTGGTGTAGTGGTATCATGCAAGATTCCCATTCTTGCGACCCGG<br>GTTTCGATTCCCGGGCGGCGCA   |  |
| ex3_39<br>72378_<br>x114 | ENST000<br>00387456<br>.1                | 38 | ##### | 75.8 | 114 | ACTTTTAAAGGATAACAGCTATCCATTGGTCTTAGGCCCCAAAATTTTGGT<br>GCAACTCC                |  |
| ex3_39<br>86185_<br>x112 | CM00067<br>8.2/71426<br>493-<br>71426565 | 22 | ##### | 44.1 | 112 | GCCCTCTTAGCGCAGTGGGCAGCGCGTCAGTCTCATAATCTGAAGGTCCT<br>GAGTTCGAGCCTCAGAGAGGGCA  |  |
| ex3_40<br>08513_<br>x108 | ENST000<br>00387459<br>.1                | 20 | ##### | 40.1 | 108 | GTTCTTGTAGTTGAAATACAACGATGGTTTTTCATATCATTGGTCGTGGTTG<br>TAGTCCGT               |  |

|                          |                                                |    |       |      |     |                                                                                |
|--------------------------|------------------------------------------------|----|-------|------|-----|--------------------------------------------------------------------------------|
| ex3_40<br>30547_<br>x104 | CM00066<br>8.2/27777<br>885-<br>27777956       | 23 | ##### | 46.1 | 104 | AGCAGAGTGGCGCAGCGGAAGCGTGCTGGGCCATAACCCAGAGGTCTGA<br>TGGATCTAAACCATCTCTGCTA    |
| ex3_40<br>84087_<br>x95  | AC00844<br>3.10/9027<br>-8955                  | 32 | ##### | 63.9 | 95  | GUUUCCGUAGUGUAGUGGUCAUCACGUUCGCCU AACACGCGAAAGGUC<br>CCCGGUUCGAAACCGGGCGGAAACA |
| ex3_41<br>21228_<br>x90  | AF381996<br>.2/4265-<br>4333                   | 26 | ##### | 52   | 90  | AGAAUAUGUCUGAUAAAAGAGUUACUUUGAUAGAGUAAAUAUAGGAG<br>CUUAAACCCCUU AUUUCUA        |
| ex3_41<br>47591_<br>x86  | CM00066<br>3.2/16146<br>2447-<br>16146237<br>6 | 29 | ##### | 58   | 86  | GCGTTGGTGGTATAGTGGTGAGCATAGCTGCCTTCCAAGCAGTTGACCCG<br>GGTTCGATTCCCGGCCAACGCA   |
| ex3_42<br>02547_<br>x78  | AF347005<br>.1/12268-<br>12338                 | 33 | ##### | 65.9 | 78  | ACUUUUAAAGGAUAACAGCUAUCCA UUGGUCU UAGGCCCAA AAAUUUU<br>GGUGCAACUCCAAAUAAAAGUA  |
| ex3_42<br>52029_<br>x72  | CM00066<br>9.2/13934<br>0700-<br>13934077<br>2 | 22 | ##### | 36.2 | 72  | GCCCCAGTGGCCTAATGGATAAGGCATTGGCCTCCTAAGCCAGGGATTGT<br>GGTTTCGAGTCCCATCTGGGGTG  |
| ex3_42<br>90368_<br>x67  | AC00867<br>0.6/83597<br>-83665                 | 17 | ##### | 34.2 | 67  | GUAAAUAUAGUUUAACCAAACAUCAGAUUGUGAAUCUGACAACAGAGG<br>CUCACGACCCCUU AUUUUACC     |
| ex3_43<br>03221_<br>x66  | CM00066<br>3.2/16144<br>0242-<br>16144017<br>1 | 21 | ##### | 42.1 | 66  | GCGTTGGTGGTATAGTGGTGAGCATAGTTGCCTTCCAAGCAGTTGACCCG<br>GGCTCGATTCCCGCCAACGCA    |
| ex3_43<br>04211_<br>x66  | AF347015<br>.1/5827-<br>5762                   | 18 | ##### | 36.2 | 66  | AGCUCCGAGGUGAUUUUCAU AUUGAAUUGCAA AUUCGAAGAAGCAGCUU<br>CAAACCUGCCGGGGCUU       |
| ex3_43<br>15094_<br>x65  | CM00066<br>7.2/18120<br>6868-<br>18120693<br>9 | 32 | ##### | 63.9 | 65  | GGGGATGTAGCTCAGTGGTAGAGCGCATGCTTTGCATGTATGAGGCCCCG<br>GGTTCGATCCCGGCATCTCCA    |
| ex3_43                   | ENST000                                        | 27 | ##### | 54   | 63  | GTTAAGATGGCAGAGCCCGTAATCGCATAAACTTAAACTTTACAGTCA                               |

|                  |                                                |    |        |      |    |                                                                                             |
|------------------|------------------------------------------------|----|--------|------|----|---------------------------------------------------------------------------------------------|
| 27414_x63        | 00386347                                       |    |        |      |    | GAGGTTCAA                                                                                   |
| ex3_43_37728_x62 | CM00067<br>8.2/87384<br>094-<br>87384022       | 21 | #####  | 42.1 | 62 | GCCTCGTTAGCGCAGTAGGCAGCGCGTCAGTCTCATAATCTGAAGGTCGT<br>GAGTTCGAGCCTCACACGGGGCA               |
| ex3_43_50892_x60 | AF346999<br>.1/4402-<br>4331                   | 32 | #####  | 63.9 | 60 | UAGGAUGGGGUGUGAUAGGUGGCACGGAGAAUUUUGGAUUCUCAGGGA<br>UGGGUUCGAUUCUCAUAGUCCUAG                |
| ex3_43_55872_x60 | AC01863<br>8.5/4694-<br>4623                   | 20 | #####  | 40.1 | 60 | GGCUCGUUGGUCUAGGGGUAUGAUUCUCGCUUAGGGUGCGAGAGGUC<br>CCGGGUUCAAAUCCCGGACGAGCCC                |
| ex3_43_62149_x59 | ENST000<br>00387314<br>.1                      | 20 | #####  | 40.1 | 59 | GTTTATGTAGCTTACCTCCTCAAAGCAATACACTGAAAATGTTTAGACGGG<br>CTCACATCA                            |
| ex3_43_64627_x59 | CM00067<br>6.2/20683<br>273-<br>20683361       | 15 | 0.0005 | 30.2 | 59 | CCTTCGATAGCTCAGCTGGTAGAGCGGAGGACTGTAGTACTTAATGTGTG<br>GTCATCCTTAGGTGCTGGTTGATTCCGGCTCGAAGGA |
| ex3_43_82127_x57 | CM00066<br>9.2/13349<br>7812-<br>13349774<br>5 | 14 | 0.003  | 28.2 | 57 | TCCTCATTAGTATAGTGATATCCCTGCCTGTCACGCGGGAGACCAGGGTT<br>CGATTCCCAGACAAGGAG                    |
| ex3_43_99368_x55 | CM00068<br>1.2/47240<br>70-<br>4724141         | 29 | #####  | 58   | 55 | GCGTTGGTGGTATAGTGGTTAGCATAGCTGCCTTCCAAGCAGTTGACCCG<br>GGTTCGATTCCCGGCCAACGCA                |
| ex3_44_08352_x54 | CM00066<br>3.2/93847<br>573-<br>93847657       | 34 | #####  | 67.9 | 54 | GGCTCCGTGGCGCAATGGATAGCGCATTGGACTTCTAGAGGCTGAAGGC<br>ATTCAAAGGTTCCGGGTTTCGAGTCCCGGCGGAGTCG  |
| ex3_44_17119_x53 | ENST000<br>00387342<br>.1                      | 23 | #####  | 46.1 | 53 | CAGAGTGTAGCTTAACACAAAGCACCCAACTTACACTTAGGAGATTTCAAC<br>TTAACTTGA                            |
| ex3_44_45071_x51 | AC00578<br>3.1/27398<br>-27326                 | 32 | #####  | 63.9 | 51 | GUUUCGUAGUGUAGCGGUUAUCACAUUCGCCUCACACGCGAAAGGUC<br>CCCGGUUCGAUCCCGGGCGGAAACA                |
| ex3_45_16301_x51 | AC00844<br>3.10/8240                           | 20 | #####  | 40.1 | 44 | GGUAGCGUGGCCGAGCGGUCUAAGGCGCUGGAUUAAGGCUCCAGUCUC<br>UUCGGGGCGUGGGUUCGAAUCCACCGCUGCCA        |

x44 -8321

|                         |                                                |    |       |      |    |                                                                                |
|-------------------------|------------------------------------------------|----|-------|------|----|--------------------------------------------------------------------------------|
| ex3_45<br>30312_<br>x42 | GL00025<br>2.2/82908<br>-82837                 | 20 | ##### | 40.1 | 42 | GGGGGTGTAGCTCAGTGGTAGAGCGCATGCTTTGCATGTATGAGGCCTCG<br>GGTTCGATCCCCGACACCTCCA   |
| ex3_45<br>33630_<br>x42 | AF347015<br>.1/5892-<br>5827                   | 25 | ##### | 50.1 | 42 | GGUAAAAUGGCUGAGUGAAGCAUUGGACUGUAAAUCUAAAGACAGGGGU<br>UAGCCUCUUUUUACCA          |
| ex3_45<br>38502_<br>x42 | ENST000<br>00387392<br>.1                      | 30 | ##### | 60   | 42 | AAGGGCTTAGCTTAATTAAGTGGCTGATTTGCGTTCAGTTGATGCAGAGT<br>GGGGTTTTG                |
| ex3_45<br>53403_<br>x40 | CM00067<br>4.2/12493<br>9966-<br>12494003<br>7 | 35 | ##### | 69.9 | 40 | GGGGATGTAGCTCAGTGGTAGAGCGCATGCTTTGCACGTATGAGGCCCC<br>GGTTCAATCCCCGGCATCTCCA    |
| ex3_46<br>09993_<br>x36 | CM00067<br>9.2/68019<br>969-<br>68019897       | 20 | ##### | 40.1 | 36 | GACCCAGTGGCCTAATGGATAAGGCATCAGCCTCCGGAGCTGGGGATTGT<br>GGTTTCGAGTCCCATCTGGGTCCG |
| ex3_46<br>29869_<br>x34 | CM00067<br>9.2/81395<br>25-<br>8139452         | 35 | ##### | 69.9 | 34 | GGCGCCGTGGCTTAGCTGGTTAAAGCGCCTGTCTAGTAAACAGGAGATCC<br>TGGTTTCGAATCCCAGCGGTGCCT |
| ex3_46<br>31909_<br>x34 | ENST000<br>00387365<br>.1                      | 33 | ##### | 65.9 | 34 | AGAAATATGTCTGATAAAAGAGTTACTTTGATAGAGTAAATAATAGGAGCTT<br>AAACCCCC               |
| ex3_46<br>41141_<br>x33 | AF382013<br>.1/10403-<br>10467                 | 37 | ##### | 73.8 | 33 | UGGUUAUUAUUUAAACAAAACGAAUGAUUUCGACUCAUUAUUUAUGA<br>UAAUCAUUAUUACCAA            |
| ex3_46<br>48071_<br>x33 | X93334.1/<br>6942-<br>7009                     | 19 | ##### | 38.2 | 33 | AAGGUUUUAGAAAAACCAUUUCAUAACUUUGUCAAGUUUUUUUAUAGGC<br>UAAAUCCUAUAUAUCUUA        |
| ex3_46<br>53038_<br>x32 | CM00067<br>9.2/75033<br>906-<br>75033978       | 20 | ##### | 40.1 | 32 | GCCCCAGTGGCCTAATGGATAAGGCACTGGCCTCCTAAGCCAGGGATTGT<br>GGTTTCGAGTCCCACCTGGGGTA  |
| ex3_46<br>65465_<br>x31 | ENST000<br>00387372<br>.1                      | 27 | ##### | 54   | 31 | TAGGATGGGGTGTGATAGGTGGCACGGAGAATTTTGGATTCTCAGGGATG<br>GGTTCGATTC               |

|                         |                                          |    |       |      |    |                                                                                         |
|-------------------------|------------------------------------------|----|-------|------|----|-----------------------------------------------------------------------------------------|
| ex3_46<br>71231_<br>x31 | AC06784<br>9.6/4771-<br>4840             | 18 | ##### | 36.2 | 31 | CACUGUAAAGCUAACUUAGCAUUAACCUUUUAAGUUAAGAUUAAGAGAA<br>CCAACACCUCUUUACAGUGA               |
| ex3_46<br>71882_<br>x31 | CM00067<br>9.2/82229<br>04-<br>8222833   | 21 | ##### | 42.1 | 31 | GGCTCGTTGGTCTAGGGGTATGATTCTCGCTTCGGGTGCGAGAGGTCCC<br>GGTTCAAATCCCGGACGAGCCC             |
| ex3_46<br>87323_<br>x30 | CM00067<br>4.2/98503<br>503-<br>98503574 | 35 | ##### | 69.9 | 30 | TCCTCGTTAGTATAGTGGTTAGTATCCCCGCCTGTCACGCGGGAGACCGG<br>GTTCAATCCCGACGGGGAG               |
| ex3_47<br>01904_<br>x29 | AC00532<br>9.1/7043-<br>6971             | 36 | ##### | 71.9 | 29 | GCCGAAAUAGCUCAGUUGGGAGAGCGUUAGACUGAAGAUCUAAAGGUC<br>CCUGGUUCGAUCCCGGGUUUCGGCA           |
| ex3_47<br>06302_<br>x28 | KV88076<br>8.1/90924<br>7-909328         | 32 | ##### | 63.9 | 28 | GGTAGCGTGGCCGAGTGGTCTAAGGCGCTGGATTTAGGCTCCAGTCATTT<br>CGATGGCGTGGGTTTGAATCCCACCGCTGCCA  |
| ex3_47<br>06834_<br>x28 | CM00067<br>9.2/39153<br>805-<br>39153734 | 26 | ##### | 52   | 28 | GGGGGTATAGCTCAGTGGTAGAGCATTGACTGCAGATCAAGAGGTCCCC<br>GTTCAAATCCGGGTGCCCCCT              |
| ex3_47<br>36001_<br>x26 | GL00025<br>6.2/17300<br>1-172930         | 21 | ##### | 42.1 | 26 | GGGGGTGTAGCTCAGTGGTAGAGCGCGTGCTTAGCATGCACGAGGCCCC<br>GGTTCAATCCCGGCACCTCCA              |
| ex3_47<br>38159_<br>x26 | CM00067<br>3.2/66348<br>120-<br>66348201 | 22 | ##### | 44.1 | 26 | GACGAGGTGGCCGAGTGGTTAAGGCGATGGACTGCTAATCCATTGTGCTT<br>TGCACGCGTGGGTTTGAATCCCATCCTCGTCCG |
| ex3_47<br>41773_<br>x26 | ENST000<br>00387439<br>.1                | 22 | ##### | 44.1 | 26 | TGGTATATAGTTTAAACAAAACGAATGATTTGACTCATTAAATTATGATAAT<br>CATATTT                         |
| ex3_47<br>62471_<br>x25 | CM00066<br>3.2/16546<br>009-<br>16545939 | 35 | ##### | 69.9 | 25 | GCATTGGTGGTTCAGTGGTAGAATTCTCGCCTCCCACGCGGGAGACCCG<br>GTTCAATCCCGGCCAATGCA               |
| ex3_47<br>80985_<br>x23 | CM00067<br>9.2/82215<br>48-<br>8221619   | 29 | ##### | 58   | 23 | GCGTTGGTGGTATAGTGGTAAGCATAGCTGCCTTCCAAGCAGTTGACCCG<br>GTTTCGATTCCCGGCCAACGCA            |

|                         |                                          |    |        |      |    |                                                                                                  |
|-------------------------|------------------------------------------|----|--------|------|----|--------------------------------------------------------------------------------------------------|
| ex3_48<br>05993_<br>x22 | CM00066<br>8.2/27547<br>823-<br>27547752 | 21 | #####  | 42.1 | 22 | GGTTCATGGTGTAAATGGTTAGCACTCTGGACTCTGAATCCAGCGATCCG<br>AGTTCAAGTCTCGGTGGAACCT                     |
| ex3_48<br>09315_<br>x22 | CM00066<br>8.2/26575<br>570-<br>26575659 | 31 | #####  | 61.9 | 22 | CTTTCGATAGCTCAGTTGGTAGAGCGGAGGACTGTAGGTTCACTAACTAA<br>GGCATCCTTAGGTCGCTGGTTCGAATCCGGCTCGAAGGA    |
| ex3_48<br>15269_<br>x21 | CM00067<br>6.2/22929<br>701-<br>22929773 | 35 | #####  | 69.9 | 21 | GGGCCAGTGGCGCAATGGATAACCGCTCTGACTACGGATCAGAAGATTCC<br>AGGTTGACTCCTGGCTGGCTCG                     |
| ex3_48<br>32258_<br>x21 | CM00066<br>8.2/57800<br>211-<br>57800284 | 20 | #####  | 40.1 | 21 | GGCCGGTTAGCTCAGTCGGTTAGAGCGTGGTGCTAATAACGCCAAGGTCCG<br>CGGGTTCGATCCCCGTGCCGGTCA                  |
| ex3_48<br>37996_<br>x20 | AL352978<br>.6/119697<br>-119770         | 17 | #####  | 34.2 | 20 | GGCCGGUUAGCUCAGUUAGGUAAGAGCGUGGUGCUAAUACGCCAAGGU<br>CGCGGGUUCGAUCCCCGUACGGGCCA                   |
| ex3_48<br>69881_<br>x18 | CM00066<br>4.2/45710<br>374-<br>45710302 | 14 | 0.003  | 28.2 | 18 | GGCTGTGTACCTCAGTGGGCAAGGGTATGGACTTTGAAGCCAGACTATTT<br>GGTTCAAATCCCAGCTTGGCCT                     |
| ex3_48<br>75173_<br>x18 | AC10808<br>1.2/59868<br>-59786           | 20 | #####  | 40.1 | 18 | GUCAGGAUGGCCGAGCGGUCUAAGGCGCUGCGUUCAGGUCGCAGUCUC<br>CCUGGAGGCGUGGGUUCGAAUCCCACUUCUGACA           |
| ex3_48<br>77873_<br>x18 | J01415.2/<br>7514-<br>7446               | 21 | #####  | 42.1 | 18 | GAAAAAGTCATGGAGGCCATGGGGTTGGCTTGAACCAGCTTTGGGGGGT<br>TCGATTCCTTCTTTTTTG                          |
| ex3_48<br>81275_<br>x18 | CM00067<br>4.2/98504<br>252-<br>98504323 | 19 | #####  | 38.2 | 18 | GACCTCGTGGCGCAACGGTAGCGCGTCTGACTCCAGATCAGAAGGCTGC<br>GTGTTCAATCACGTCGGGGTCA                      |
| ex3_48<br>89666_<br>x17 | J01415.2/<br>3230-<br>3304               | 15 | 0.0005 | 30.2 | 17 | GTTAAGATGGCAGAGCCCGGTAATCGCATAAACTTAAACTTTACAGTCA<br>GAGGTTCAATTCCTCTTAAACA                      |
| ex3_48<br>90737_<br>x17 | CM00068<br>1.2/39412<br>260-<br>39412168 | 20 | #####  | 40.1 | 17 | GCTCCAGTGGCGCAATCGGTTAGCGCGGTACTIONTATATGACAGTGCAG<br>CGGAGCAATGCCGAGTTGTGAGTTCGATCCTCACCTGGAGCA |

|                         |                                          |    |       |      |    |                                                                                                   |
|-------------------------|------------------------------------------|----|-------|------|----|---------------------------------------------------------------------------------------------------|
| ex3_48<br>94868_<br>x17 | CM00066<br>8.2/26705<br>377-<br>26705449 | 14 | 0.006 | 28.2 | 17 | GGGGAATTAGCTCAAGCGGTAGAGCGCTTGCTTAGCATGCAAGAGGTAGT<br>GGGATCGATGCCACATTCTCCA                      |
| ex3_49<br>01124_<br>x17 | CM00067<br>7.2/89335<br>073-<br>89335145 | 22 | ##### | 44.1 | 17 | GGCCGCGTGGCCTAATGGATAAGGCGTCTGACTTCGGATCAGAAGATTGC<br>AGGTTGAGTCCTGCCGCGGTGCG                     |
| ex3_49<br>06003_<br>x17 | ENST000<br>00387419<br>.1                | 20 | ##### | 40.1 | 17 | AAGGTATTAGAAAAACCATTTTCATAACTTTGTCAAAGTTAAATTATAGGCTA<br>AATCCTAT                                 |
| ex3_49<br>07890_<br>x17 | CM00067<br>6.2/20657<br>557-<br>20657464 | 13 | 0.009 | 26.3 | 17 | CCTTCGATAGCTCAGCTGGTAGAGCGGAGGACTGTAGATTGTATAGACAT<br>TTGCGGACATCCTTAGGTGCTGGTTCGATTCCAGCTCGAAGGA |
| ex3_49<br>10350_<br>x16 | GL00025<br>1.2/13811<br>8-138045         | 35 | ##### | 69.9 | 16 | GGCTCTGTGGCTTAGTTGGCTAAAGCGCCTGTCTCGTAAACAGGAGATCC<br>TGGTTTGAATCCCAGCGGGGCCT                     |
| ex3_49<br>22190_<br>x16 | AL132988<br>.4/95773-<br>95841           | 28 | ##### | 56   | 16 | AAGGGCUUAGCUUAAUUAAAGUGGCUGAUUUUGCGUUCAGUUGAUGCAG<br>AGUGGGGUUUUGCAGUCCUUA                        |
| ex3_49<br>30333_<br>x15 | CM00066<br>8.2/26553<br>503-<br>26553574 | 31 | ##### | 61.9 | 15 | GGGGATGTAGCTCAGTGGTAGAGCGCATGCTTCGCATGTATGAGGTCCCG<br>GGTTCGATCCCCGGCATCTCCA                      |
| ex3_49<br>33378_<br>x15 | CM00066<br>8.2/26577<br>104-<br>26577192 | 13 | 0.01  | 26.3 | 15 | CCTTCGATAGCTCAGTTGGTAGAGCGGAGGACTGTAGGCTCATTAAGCAA<br>GGTATCCTTAGGTGCTGGTTCGAATCCGGCTCGGAGGA      |
| ex3_49<br>34413_<br>x15 | CM00066<br>8.2/27902<br>564-<br>27902493 | 20 | ##### | 40.1 | 15 | AGCAGAGTGGCGCAGCGGAAGCGTGCTGGGCCATAACCCAGAGGTCTGA<br>TGGATCGAAACCATCCTCTGCTA                      |
| ex3_49<br>36363_<br>x15 | CM00066<br>5.2/45689<br>071-<br>45688999 | 18 | ##### | 36.2 | 15 | GGGCCAGTGGCGCAATGGATAACGCGTCTGACTACGGATCAGAAGATTCT<br>AGGTTGACTCCTGGCTGGCTCG                      |
| ex3_49<br>50328_<br>x15 | CM00066<br>8.2/27545<br>689-             | 41 | ##### | 81.8 | 15 | GTAGTCGTGGCCGAGTGGTTAAGGCGATGGACTTGAAATCCATTGGGGTT<br>TCCCCGCGCAGGTTTGAATCCTGCCGACTACG            |

27545770

|                         |                                          |    |       |      |    |                                                                                                                  |
|-------------------------|------------------------------------------|----|-------|------|----|------------------------------------------------------------------------------------------------------------------|
| ex3_49<br>52113_<br>x14 | AC02499<br>5.8/16571<br>7-165798         | 24 | ##### | 48.1 | 14 | GUAGUCGUGGCCGAGUGGUUAAGGCGAUGGACUAGAAAUCCAUUGGGG<br>UCUCCCCGCGCAGGUUCGAAUCCUGCCGACUACG                           |
| ex3_49<br>58749_<br>x14 | CM00067<br>9.2/19508<br>181-<br>19508252 | 17 | ##### | 34.2 | 14 | GACCTCGTGGCGCAATGGTAGCGCTGACTCCAGATCAGAAGGTTGC<br>GTGTTCAAGTCACGTCGGGGTCA                                        |
| ex3_49<br>67443_<br>x14 | CM00067<br>2.2/69592<br>941-<br>69593006 | 13 | 0.01  | 26.3 | 14 | GGTAAATGGCTGAGCAAGCATTGGACTGTAAATCTAAAGACAGATGTTGA<br>GCCATCTTTTGTAGCA                                           |
| ex3_49<br>72539_<br>x14 | ENST000<br>00387400<br>.1                | 36 | ##### | 63.9 | 14 | TAGATTGAAGCCAGTTGATTAGGGTGCTTAGCTGTAACTAAGTGTGTTGTG<br>GTTTAAAGT                                                 |
| ex3_49<br>89358_<br>x13 | AF134583<br>.1/1816-<br>1744             | 19 | ##### | 38.2 | 13 | UAGAUUGAAGCCAGUUGAUUAGGGUGCUUAGCUGUUAACUAAGUGUUU<br>GUGGGUUUAAGUCCCAUUGGUCUAG                                    |
| ex3_49<br>99105_<br>x12 | CM00067<br>3.2/76235<br>896-<br>76235825 | 35 | ##### | 69.9 | 12 | GGCTCGTTGGTCTAGGGGTATGATTCTCGGTTTGGGTCCGAGAGGTCCCG<br>GTTCAAATCCCGGACGAGCCC                                      |
| ex3_50<br>01313_<br>x12 | CM00067<br>7.2/40593<br>906-<br>40593825 | 19 | ##### | 38.2 | 12 | GACGAGGTGGCCGAGTGGTTAAGGCGATGGACTGCTAATCCATTGTGCTC<br>TGCACGCGTGGGTTTCAATCCCATCCTCGTCG                           |
| ex3_50<br>01985_<br>x12 | AF134583<br>.1/1599-<br>1666             | 30 | ##### | 60   | 12 | AGAAUUUAGGUUAAAUACAGACCAAGAGCCUUCAAAGCCCUCAGUAAG<br>UUGCAAUACUAAUUUCUG                                           |
| ex3_50<br>21113_<br>x12 | CM00066<br>8.2/28941<br>053-<br>28941157 | 23 | ##### | 46.1 | 12 | GTCAGGATGGCCGAGTGGTCTAAGGCGCCAGACTCAAGCTTGGCTTCCTC<br>GTGTTGAGGATTCTGGTCTCCAATGGAGGCGTGGGTTTCAATCCCCTTC<br>TGACA |
| ex3_50<br>30622_<br>x11 | CM00067<br>0.2/67585<br>596-<br>67585528 | 13 | 0.008 | 26.3 | 11 | GTAGCTGTAGTTTAAGCAAACATTAGATTGTGGATCTAACAATAGAAGCC<br>TTCAATTTCTTATCTACC                                         |

|                         |                                                |    |       |      |    |                                                                                              |
|-------------------------|------------------------------------------------|----|-------|------|----|----------------------------------------------------------------------------------------------|
| ex3_50<br>34252_<br>x11 | CM00067<br>7.2/95784<br>645-<br>95784717       | 14 | 0.003 | 28.2 | 11 | GCACTGCACAGTCAGTCAGTAGAGCATGGGACTCTTAATCCCAGGGTCGT<br>GGGTTCAAGCCCCACGTTGGGCG                |
| ex3_50<br>34934_<br>x11 | CM00066<br>6.2/54883<br>22-<br>5488403         | 14 | 0.003 | 28.2 | 11 | GATTTTATGGTGTAAATGGTGAGCACTCTGGACTTGAATCCAGAATTAACA<br>AACAGAACATCCTGCAATTTTATTAAGAGCA       |
| ex3_50<br>37431_<br>x11 | GL00025<br>2.2/8616-<br>8544                   | 35 | ##### | 69.9 | 11 | GGCCGCGTGGCCTAATGGATAAGGCGTCTGATTCCGGATCAGAAGATTGA<br>GGTTTCGAGTCCCTTCGTGGTCCG               |
| ex3_50<br>41259_<br>x11 | AL163195<br>.5/3702-<br>3774                   | 21 | ##### | 42.1 | 11 | GGCUCCAUAGCUCAGGGGUUAGAGCACUGGUCUUGUAAACCAGGGGUC<br>GCGAGUUCAAUCUCGCGUGGGGCCU                |
| ex3_50<br>44086_<br>x11 | GL00025<br>1.2/21669<br>9-216772               | 22 | ##### | 44.1 | 11 | GGCTCCGTAGCTTAGTTGGTTAAAGCGCCTGTCTAGTAAACAGGAGATCC<br>TGGTTTCGACTCCCAGCGGGGCCT               |
| ex3_50<br>44691_<br>x11 | CM00066<br>8.2/26571<br>936-<br>26571864       | 21 | ##### | 42.1 | 11 | GGGAATTAGCTCAAATGGTAGAGCGCTCGCTTAGCATGCGAGAGGTAGC<br>GGATCGATGCCCGCATTCTCCA                  |
| ex3_50<br>46165_<br>x11 | CM00067<br>9.2/81209<br>25-<br>8121012         | 34 | ##### | 67.9 | 11 | GGCTCTGTGGCGCAATGGATAGCGCATTGGACTTCTAGTGACGAATAGAG<br>CAATTCAAAGGTTGTGGTTTCGAATCCCACCAGAGTCG |
| ex3_50<br>46429_<br>x11 | CM00066<br>8.2/14421<br>6547-<br>14421662<br>9 | 23 | ##### | 46.1 | 11 | ACCAGGATGGCCGAGTGGTTAAGGCGTTGGACTTAAGATCCAATGGACAT<br>ATGTCCGCGTGGTTTCGAACCCCACTCCTGGTA      |
| ex3_50<br>46935_<br>x11 | CM00066<br>8.2/27562<br>184-<br>27562270       | 25 | ##### | 50.1 | 11 | GGCTCTGTGGCGCAATGGATAGCGCATTGGACTTCTAGCCTAAATCAAGA<br>GATTCAAAGGTTGCGGGTTCGAGTCCCTCCAGAGTCG  |
| ex3_50<br>54868_<br>x10 | CM00066<br>4.2/15640<br>0769-<br>15640084<br>0 | 31 | ##### | 61.9 | 10 | GGGGATGTAGCTCAGTGGTAGAGCGCGCGCTTCGCATGTGTGAGGTCCC<br>GGTTCAATCCCCGGCATCTCCA                  |

|                         |                                                |    |        |      |    |                                                                                                                    |
|-------------------------|------------------------------------------------|----|--------|------|----|--------------------------------------------------------------------------------------------------------------------|
| ex3_50<br>56248_<br>x10 | CM00066<br>3.2/24887<br>3855-<br>24887396<br>0 | 39 | #####  | 77.8 | 10 | GTCAGGATGGCCGAGTGGTCTAAGGCGCCAGACTCAAGGTAAGCACCTT<br>GCCTGCGGGCTTTCTGGTCTCCGGATGGAGGCGTGGGTTCGAATCCCAC<br>TTCTGACA |
| ex3_50<br>64778_<br>x10 | CM00066<br>4.2/20336<br>4478-<br>20336440<br>8 | 25 | #####  | 50.1 | 10 | GCAATGGTGGTTCAGTGGTAGAATTCTCGCCTTTCACACAGGAGACCCGG<br>GTTCAATTCCTGACCCATGTA                                        |
| ex3_50<br>66998_<br>x10 | CM00066<br>8.2/26319<br>173-<br>26319102       | 35 | #####  | 69.9 | 10 | GACCTCGTGGCGCAACGGTAGCGGTCTGACTCCAGATCAGAAGGTTGC<br>GTGTTCAAATCACGTCGGGGTCA                                        |
| ex3_50<br>67238_<br>x10 | CM00067<br>8.2/31880<br>94-<br>3188165         | 24 | #####  | 48.1 | 10 | GGCTCGTTGGTCTAGGGGTATGATTCTCGCTTTGGGTGCGAGAGGTCCCG<br>GGTTCAAATCCCGGACGAGCCC                                       |
| ex3_50<br>72148_<br>x10 | CM00066<br>8.2/26299<br>677-<br>26299749       | 25 | #####  | 50.1 | 10 | GACCACGTGGCCTAATGGATAAGGCGTCTGACTTCGGATCAGAAGATTGA<br>GGTTCTGAATCCCTTCGTGGTTA                                      |
| ex3_50<br>74328_<br>x10 | CM00067<br>0.2/12315<br>7302-<br>12315723<br>0 | 35 | #####  | 69.9 | 10 | GCCTCGTTAGCGCAGTAGGTAGCGCGTCAGTCTCATAATCTGAAGGTCGT<br>GAGTTCGATCCTCACACGGGGCA                                      |
| ex3_50<br>75628_<br>x10 | ENST000<br>00387382<br>.1                      | 22 | #####  | 44.1 | 10 | AGAAATTTAGGTTAAATACAGACCAAGAGCCTTCAAAGCCCTCAGTAAGTT<br>GCAATACTT                                                   |
| ex3_50<br>79222_<br>x9  | CM00066<br>7.2/16838<br>9710-<br>16838963<br>9 | 14 | 0.003  | 28.2 | 9  | GCCCAACTGGTTCAGTCGGTAGAGAATGAGACTCTTAATCTCAGGTCATAG<br>ATTCATGTACATGTTGGGTG                                        |
| ex3_50<br>88933_<br>x9  | CM00066<br>8.2/28807<br>905-<br>28807833       | 20 | 0.0001 | 32.2 | 9  | GCCGAGATAGCTCAGTTGGGAGAGCGTTAGACTGAAGATCTAAAGGTCCC<br>TGTTCAATCCCGGGTTTCGGCA                                       |
| ex3_50                  | ENST000                                        | 22 | #####  | 44.1 | 9  | ACTCTTTTAGTATAAATAGTACCGTTAACTTCCAATTAAGTCTTTGACAAC                                                                |

|        |           |    |       |      |   |                                                      |
|--------|-----------|----|-------|------|---|------------------------------------------------------|
| 95665_ | 00387429  |    |       |      |   | ATTCAAA                                              |
| x9     | .1        |    |       |      |   |                                                      |
| ex3_50 | CM00066   | 29 | ##### | 58   | 9 | GGTCCCATGGTGTAAATGGTTAGCACTCTGGGCTTTGAATCCAGCAATCCG  |
| 97987_ | 8.2/14518 |    |       |      |   | AGTTCGAATCTTGGTGGGACCT                               |
| x9     | 2723-     |    |       |      |   |                                                      |
|        | 14518279  |    |       |      |   |                                                      |
|        | 4         |    |       |      |   |                                                      |
| ex3_51 | GL00025   | 22 | ##### | 44.1 | 8 | GGTCCCATGGTGTAAATGGTTAGCACTCTGGACTTTGAATCCAGCAATCCGA |
| 25944_ | 1.2/79253 |    |       |      |   | GTTTCGAATCTCGGTGGGACCT                               |
| x8     | -79324    |    |       |      |   |                                                      |
| ex3_51 | CM00068   | 25 | ##### | 50.1 | 8 | ACTTTTAAAGGATTAGAGTTAACCATTGGTCTAAGGAACCAAAAACACTGG  |
| 27080_ | 1.2/56922 |    |       |      |   | TGCAACTCCAAATAAAAGTA                                 |
| x8     | 350-      |    |       |      |   |                                                      |
|        | 56922420  |    |       |      |   |                                                      |
| ex3_51 | CM00066   | 13 | 0.008 | 26.3 | 8 | GTAGTTATAGTTTAAATTAACATTAGATTGTGGATCTAATAATAGAAGTCTA |
| 29832_ | 5.2/10689 |    |       |      |   | CAGCTTCTTACCTACC                                     |
| x8     | 4340-     |    |       |      |   |                                                      |
|        | 10689427  |    |       |      |   |                                                      |
|        | 3         |    |       |      |   |                                                      |
| ex3_51 | ENST000   | 23 | ##### | 46.1 | 8 | GAAAAAGTCATGGAGGCCATGGGGTTGGCTTGAAACCAGCTTTGGGGGGT   |
| 33304_ | 00387416  |    |       |      |   | TCGATTCCTT                                           |
| x8     | .2        |    |       |      |   |                                                      |
| ex3_51 | CM00067   | 18 | ##### | 36.2 | 8 | GCCTGGATAGCTCAGTTGGTAGAGCATCAGACTTTTAACTCTGAGGGTCCA  |
| 37584_ | 8.2/73478 |    |       |      |   | GGGTTCAAGTCCCTGTTCAGGCA                              |
| x8     | 389-      |    |       |      |   |                                                      |
|        | 73478317  |    |       |      |   |                                                      |
| ex3_51 | CM00067   | 13 | 0.008 | 26.3 | 7 | AAGGAGTTAGCTCAATTAAGTGATTGATTTGCATTCAGTTGATGTAAGATA  |
| 42475_ | 4.2/26572 |    |       |      |   | AGATCTTGCAGTCCTTA                                    |
| x7     | 619-      |    |       |      |   |                                                      |
|        | 26572687  |    |       |      |   |                                                      |
| ex3_51 | ENST000   | 22 | ##### | 44.1 | 7 | GTCCTTGTAGTATAAACTAATACACCAGTCTTGTAACCGGAGATGAAAAC   |
| 54179_ | 00387460  |    |       |      |   | CTTTTTCCA                                            |
| x7     | .2        |    |       |      |   |                                                      |
| ex3_51 | CM00067   | 23 | ##### | 46.1 | 7 | GGGGGATTAGCTCAAATGGTAGAGCGCTCGCTTAGCATGCGAGAGGTAG    |
| 62656_ | 0.2/66114 |    |       |      |   | CGGGATCGATGCCCCGCATCCTCCA                            |
| x7     | 189-      |    |       |      |   |                                                      |
|        | 66114261  |    |       |      |   |                                                      |
| ex3_51 | ENST000   | 28 | ##### | 56   | 7 | AGCTCCGAGGTGATTTTCATATTGAATTGCAAATTCGAAGAAGCAGCTTCA  |
| 76537_ | 00387405  |    |       |      |   | AACCTGCCG                                            |
| x7     | .1        |    |       |      |   |                                                      |

|                        |                                                |    |       |      |   |                                                                                                 |
|------------------------|------------------------------------------------|----|-------|------|---|-------------------------------------------------------------------------------------------------|
| ex3_51<br>76670_<br>x7 | CM00067<br>1.2/12834<br>0166-<br>12834007<br>6 | 34 | ##### | 67.9 | 7 | GGCTCTGTGGCGCAATGGATAGCGCATTGGACTTCTAGCTGAGCCTAGTG<br>TGGTCATTCAAAGGTTGTGGGTTCCAGTCCCACCAGAGTCG |
| ex3_51<br>88643_<br>x6 | CM00066<br>3.2/12101<br>6915-<br>12101684<br>5 | 28 | ##### | 56   | 6 | GCACTGGTGGTTCAGTGGTAGAATTCTCGCCTCCCACGCGGGAGACCCG<br>GGTTC AATTCCCGGTCAAGATA                    |
| ex3_52<br>04327_<br>x6 | CM00067<br>9.2/40117<br>373-<br>40117300       | 14 | 0.002 | 28.2 | 6 | GACCGTGTGGCCTTAATGGATAAGGTGTCTGACTTCAGATCAGAAGATTGA<br>GGGTTTGAGTCCCTTTGTGGTCA                  |
| ex3_52<br>06547_<br>x6 | CM00067<br>2.2/62110<br>58-<br>6210975         | 17 | ##### | 34.2 | 6 | GGGGATATAGCTCAGGGGTAGAGCATTGACTGCAGAACAAGAGAGGGG<br>CGCACCGGGCACGGTGGCTCACGCCTGTAATCCCA         |
| ex3_52<br>13603_<br>x6 | CM00067<br>8.2/14285<br>893-<br>14285964       | 33 | ##### | 65.9 | 6 | GGCGCGGTGGCCAAGTGGTAAGGCGTCGGTCTCGTAAACCGAAGATCAC<br>GGTTTCGAACCCCGTCCGTGCCT                    |
| ex3_52<br>15241_<br>x6 | GL00025<br>6.2/25397<br>1-254043               | 30 | ##### | 60   | 6 | GCCTCCTTAGCGCAGTAGGCAGCGCGTCAGTCTCATAATCTGAAGGTCCT<br>GAGTTCGAACCTCAGAGGGGGCA                   |
| ex3_52<br>16699_<br>x6 | CM00066<br>8.2/27791<br>427-<br>27791356       | 24 | ##### | 48.1 | 6 | GGCCCCATGGTGTAAATGGTCAGCACTCTGGACTCTGAATCCAGCGATCCG<br>AGTTCAAATCTCGGTGGGACCC                   |
| ex3_52<br>20051_<br>x5 | CM00067<br>6.2/20613<br>862-<br>20613790       | 34 | ##### | 67.9 | 5 | GGCTCCATAGCTCAGGGGTTAGAGCGCTGGTCTTGTAACCAGGGGTGCG<br>CGAGTTCAATTCTCGCTGGGGCCT                   |
| ex3_52<br>47681_<br>x5 | CM00067<br>8.2/10721<br>565-<br>10721495       | 17 | ##### | 34.2 | 5 | ACTTTTAAAGGATAAGAGTTATCCATTGGTCTCAGGAACCAAAAACATCGG<br>TGCAACTCCAAATAAAAGTA                     |
| ex3_52<br>48706_<br>x5 | CM00066<br>8.2/26322<br>818-                   | 35 | ##### | 69.9 | 5 | GACCACGTGGCCTAATGGATAAGGCGTCTGACTTCGGATCAGAAGATTGA<br>GGTTTCGAATCCCTCCGTGGTTA                   |

26322890

|                        |                                                |    |        |      |   |                                                                                             |
|------------------------|------------------------------------------------|----|--------|------|---|---------------------------------------------------------------------------------------------|
| ex3_52<br>51026_<br>x5 | CM00066<br>8.2/27618<br>356-<br>27618429       | 17 | 0.01   | 26.3 | 5 | GGCCCTGTAGCTCAGCGGTTGGAGCGCTGGTCTCGTAAACCTAGGGGTC<br>GTGAGTTCAAATCTCACCAGGGCCT              |
| ex3_52<br>54701_<br>x5 | CM00066<br>4.2/13027<br>3728-<br>13027365<br>6 | 13 | 0.009  | 26.3 | 5 | TAGATTGAAGCCAGTTGATTAGGGTGTTTATCTGTTAATTAATGTTTCGTGG<br>GTTTAAGTCCCATCAATCTAG               |
| ex3_52<br>57326_<br>x5 | CM00066<br>8.2/27273<br>960-<br>27274033       | 19 | 0.0008 | 30.2 | 5 | GGCTGGTTAGTTCAGTTGGTTAGAGCGTGGTGCTAATAACGCCAAGGTCTG<br>TGGTTTCGATCCCCATATCGGCCA             |
| ex3_52<br>60746_<br>x5 | GL00025<br>4.2/1093-<br>1022                   | 26 | #####  | 52   | 5 | GGGGGTGTAGCTCAGTGGTAGAGCGTATGCTTAACATTCATGAGGCTCTG<br>GTTTCGATCCCCAGCACTTCCA                |
| ex3_52<br>66835_<br>x4 | CM00066<br>3.2/14832<br>8812-<br>14832888<br>3 | 32 | #####  | 63.9 | 4 | GGTTCATGGTGTAATGGTAAGCACTCTGGACTCTGAATCCAGCCATCTGA<br>GTTTCGAGTCTCTGTGGAACCT                |
| ex3_52<br>70211_<br>x4 | CM00066<br>8.2/27335<br>062-<br>27334990       | 26 | #####  | 52   | 4 | GCCTGGGTAGCTCAGTCGGTAGAGCATCAGACTTTTAATCTGAGGGTCCA<br>GGTTCAAGTCCCTGTCCAGGCG                |
| ex3_52<br>74403_<br>x4 | CM00066<br>8.2/27591<br>886-<br>27591814       | 29 | #####  | 58   | 4 | GCCTGGATAGCTCAGTCGGTAGAGCATCAGACTTTTAATCTGAGGGTCCA<br>GGTTCAAGTCCCTGTTCAGGCG                |
| ex3_52<br>75459_<br>x4 | CM00067<br>9.2/38869<br>363-<br>38869292       | 20 | 0.0001 | 32.2 | 4 | GGGGGTATAGCTCAGTGGTAGAGCATTGACTGCAGATCAAGAGGTCCCT<br>GTTCAAATCCGGGTGCCCCCT                  |
| ex3_52<br>81515_<br>x4 | CM00067<br>3.2/59551<br>294-<br>59551379       | 16 | 0.0001 | 32.2 | 4 | GGCTCTGTGGCGCAATGGATAGCGCATTGGACTTCTAGATAGTTAGAGAA<br>ATTCAAAGGTTGTGGGTTTCGAGTCCCACCAGAGTCG |

|                        |                                                |    |        |      |   |                                                                                                                  |
|------------------------|------------------------------------------------|----|--------|------|---|------------------------------------------------------------------------------------------------------------------|
| ex3_52<br>82383_<br>x4 | CM00067<br>4.2/97096<br>986-<br>97096913       | 14 | 0.004  | 28.2 | 4 | GGCAATGTAGCATTGTGGCTAAGTGCACAGGCTTTGGAAACTGGCAGGCC<br>TGGTTCAAATCCCAGCTTATTCA                                    |
| ex3_52<br>82655_<br>x4 | CM00066<br>8.2/28474<br>625-<br>28474552       | 26 | #####  | 52   | 4 | GGCTCTATGGCTTAGTTGGTTAAAGCGCCTGTCTTGTAACAGGAGATCCT<br>GGTTTCGAATCCCAGTAGAGCCT                                    |
| ex3_52<br>82891_<br>x4 | GL00025<br>5.2/16191<br>0-161805               | 21 | #####  | 42.1 | 4 | GTCAGGATGGCCGAGTGGTCTAAGGCGCCAGACTCAAGCTAAGCTTCCTC<br>CGCGGTGGGATTCTGGTCTCCAATGGAGGCGTGGTTTCGAATCCCCTT<br>CTGACA |
| ex3_52<br>86767_<br>x4 | CM00068<br>5.2/10201<br>0285-<br>10201035<br>5 | 13 | 0.009  | 26.3 | 4 | GTTAGTGTAGCTTAATATGGTAAAGCAAGGCACTGAAAGTGCGTAGATGAG<br>TTCATGTA ACTCCATAAACA                                     |
| ex3_52<br>91467_<br>x4 | CM00067<br>1.2/50964<br>08-<br>5096340         | 13 | 0.008  | 26.3 | 4 | AAGGACTTAGCTTAATTAAGTGGTTGATTTGCGTTCAACTGATGCAGAAT<br>AGAGTTTTGCAGTCCTTG                                         |
| ex3_52<br>94091_<br>x4 | CM00067<br>9.2/31550<br>074-<br>31550145       | 32 | #####  | 63.9 | 4 | GGCGCGGTGGCCAAGTGGTAAGGCGTCGGTCTCGTAAACCGAAGATCGC<br>GGTTTCGAACCCCGTCCGTGCCT                                     |
| ex3_53<br>05835_<br>x4 | GL00025<br>4.2/61628<br>-61557                 | 21 | #####  | 42.1 | 4 | GGGGTATAGCTCAGTGGTAGAGCGCGTGCTTAGCATGCACGAGGTCCT<br>GGTTTCGATCCCCAGTACCTCCA                                      |
| ex3_53<br>12343_<br>x4 | CM00066<br>8.2/27275<br>284-<br>27275211       | 35 | #####  | 69.9 | 4 | GGCTGGTTAGCTCAGTTGGTTAGAGCGTGGTGCTAATAACGCCAAGGTTCG<br>CGGTTTCGATCCCCGTA CTGGCCA                                 |
| ex3_53<br>17963_<br>x4 | CM00066<br>8.2/27297<br>996-<br>27298077       | 28 | #####  | 56   | 4 | GACGAGGTGGCCGAGTGGTTAAGGCGATGGACTGCTAATCCATTGTGCTC<br>TGCACGCGTGGTTTCGAATCCCACCTTCGTCG                           |
| ex3_53<br>19019_<br>x4 | CM00066<br>3.2/15914<br>1684-<br>15914161<br>1 | 23 | 0.0007 | 30.2 | 4 | GTCTCTGTGGCGCAATGGACGAGCGCGCTGGACTTCTAATCCAGAGGTTCC<br>CGGTTTCGAGTCCC GGCAGAGATG                                 |

|                        |                                                |    |        |      |   |                                                                                         |
|------------------------|------------------------------------------------|----|--------|------|---|-----------------------------------------------------------------------------------------|
| ex3_53<br>19677_<br>x3 | CM00066<br>3.2/16727<br>285-<br>16727355       | 21 | #####  | 42.1 | 3 | GCCTTGGTGGTGCAGTGGTAGAATTCTCGCCTCCCACGTGGGAGACCCG<br>GGTTCAATTCCCGGCCAATGCA             |
| ex3_53<br>20757_<br>x3 | CM00067<br>7.2/79744<br>655-<br>79744727       | 30 | #####  | 60   | 3 | GGGGGTATAGCTCAGTGGGTAGAGCATTGACTGCAGATCAAGAGGTCCC<br>CGGTTCAAATCCGGGTGCCCCCT            |
| ex3_53<br>23958_<br>x3 | CM00067<br>9.2/19860<br>862-<br>19860932       | 18 | #####  | 36.2 | 3 | GCATTGGTGGTTCAATGGTAGAATTCTCGCCTCCCACGCAGGAGACCCAG<br>GTTCGATTCTGGCCAATGCA              |
| ex3_53<br>25896_<br>x3 | CM00067<br>6.2/20681<br>690-<br>20681762       | 26 | #####  | 52   | 3 | GGCCCTATAGCTCAGGGGTTAGAGCACTGGTCTTGTAACCAGGGGTCCG<br>GAGTTCAAATCTCGCTGGGGCCT            |
| ex3_53<br>30303_<br>x3 | CM00068<br>3.2/35891<br>030-<br>35891100       | 13 | 0.008  | 26.3 | 3 | GAGGATTTAGTTTAATTAATAAATGTTTGATTTGCATTCAATTGATGTAAGATA<br>GAGAGTGTGCAGTCCTTA            |
| ex3_53<br>32814_<br>x3 | CM00066<br>3.2/14802<br>0474-<br>14802054<br>4 | 15 | 0.001  | 30.2 | 3 | GCGTTGGCAGTTCAGTGGTAGAATTCTCGCCTCCCACCCGGGAGACCTGG<br>ATTCCATTTCCGGCAAATGCA             |
| ex3_53<br>32886_<br>x3 | CM00067<br>2.2/67764<br>503-<br>67764584       | 20 | 0.0001 | 32.2 | 3 | GCAGCGATGGCCGAGTGGTTAAGGCGTTGGACTTGAAATCCAATGGGGTC<br>TCCCCGCGCAGGTTCGAACCCCTGCTCGCTGCG |
| ex3_53<br>34191_<br>x3 | CM00066<br>9.2/64110<br>400-<br>64110468       | 13 | 0.008  | 26.3 | 3 | AAGGGCTTAGCTTAATTAAGTGATTGATTTGCATTCAATTGATACAGAATA<br>GAGTTTTTTCAGTCCTTA               |
| ex3_53<br>35100_<br>x3 | CM00066<br>3.2/14824<br>6758-<br>14824683<br>1 | 15 | 0.0006 | 30.2 | 3 | GTCTCTGTGGCGCAATCGGTCAGAGCGTTCGGCTATTAACCGAACGGTGA<br>GTAGTTCAAGACCACCCAGGGACG          |
| ex3_53<br>36708_<br>x3 | GL00025<br>0.2/77722                           | 20 | #####  | 40.1 | 3 | GGGGGTATAGCTCAGCGGTAGAGCGCGTGCTTAGCATGCACGAGGTCTC<br>GGTTCAATCCCAATACCTCCA              |

|                        |                                                |    |       |      |   |                                                                                                   |  |
|------------------------|------------------------------------------------|----|-------|------|---|---------------------------------------------------------------------------------------------------|--|
| x3                     | -77651                                         |    |       |      |   |                                                                                                   |  |
| ex3_53<br>38001_<br>x3 | CM00067<br>9.2/60786<br>232-<br>60786302       | 26 | ##### | 36.2 | 3 | GCCCGGATAGTTCAGTTGGTAGAGCATCAGACTTAATCAGAGGGTCCAGG<br>GTTCAAGTCCCTGTTTGGGTG                       |  |
| ex3_53<br>39519_<br>x3 | CM00066<br>3.2/22246<br>5005-<br>22246507<br>7 | 14 | 0.005 | 28.2 | 3 | GGCTCCATAGCTCAGTGGTTAGAGCACTGGTCTTGTAACCAGGGGTCCG<br>GAGTTCGATCCTCGCTGGGGCCT                      |  |
| ex3_53<br>40467_<br>x3 | CM00067<br>3.2/10916<br>5312-<br>10916539<br>3 | 13 | 0.01  | 26.3 | 3 | TGAGTTGTAGCTGAGTGGTTAAGGCAACGAGCTAGAAATTCGTTGGTTTCT<br>CTCTGTGCAGTTTGAATCCTGCTAATTATG             |  |
| ex3_53<br>42909_<br>x3 | CM00066<br>3.2/14969<br>8551-<br>14969847<br>8 | 17 | 0.009 | 26.3 | 3 | ATCTCCGTGGAGCAATTGGTTAGCGCGTTCGGCTGTTAACCGGAAAGTTG<br>GTGGTTCGAGCCTACCCAGGGACG                    |  |
| ex3_53<br>45954_<br>x3 | CM00067<br>6.2/84172<br>756-<br>84172830       | 15 | 0.002 | 30.2 | 3 | GTTAAGATGACAGAGCCTGGCAATTGCGTAAACTTAAACTTTATAATCA<br>GAGGTTCAACTTCTGCTCTTAACA                     |  |
| ex3_53<br>46119_<br>x3 | CM00067<br>1.2/78741<br>498-<br>78741570       | 13 | 0.009 | 26.3 | 3 | GAGATTGAGACCAGTTGATTAAGGTGTTTAGCTGTTAACTAAATTTTTGTGG<br>GTTTGAATTCCATCAATCTAG                     |  |
| ex3_53<br>49512_<br>x3 | CM00066<br>4.2/21824<br>5826-<br>21824591<br>8 | 14 | 0.004 | 28.2 | 3 | CCTTCAATAGTTCAGCTGGTAGAGCAGAGGACTATAGCTACTTCCTCAGTA<br>GGAGACGTCCTTAGGTTGCTGGTTCGATTCCAGCTTGAAGGA |  |
| ex3_53<br>50487_<br>x3 | CM00066<br>5.2/13222<br>9171-<br>13222910<br>0 | 32 | ##### | 63.9 | 3 | GGGGGTGTAGCTCAGTGGTAGAGCATTTGACTGCAGATCAAGAGGTCCCT<br>GTTCAAATCCAGGTGCCCCCT                       |  |

|                        |                                                |    |       |      |   |                                                                                              |
|------------------------|------------------------------------------------|----|-------|------|---|----------------------------------------------------------------------------------------------|
| ex3_53<br>51606_<br>x3 | CM00068<br>5.2/24601<br>905-<br>24601837       | 21 | ##### | 42.1 | 3 | GTGGGTATAGCTCAGAGGTAGAGCATTCAACTGCAGATCGAAGTGGCTGT<br>ACCATTTTGCATTCCCACC                    |
| ex3_53<br>51681_<br>x3 | CM00066<br>3.2/14826<br>5179-<br>14826510<br>8 | 40 | ##### | 79.8 | 3 | GGTTCCATGGTGTAAATGGTAAGCACTCTGGACTCTGAATCCAGCGATCCG<br>AGTTCGAGTCTCGGTGGAACCT                |
| ex3_53<br>54642_<br>x3 | CM00067<br>3.2/10340<br>5997-<br>10340606<br>9 | 14 | 0.004 | 28.2 | 3 | TAGATTGAAGCCAGTTGATTAGGATGTTTAGCTGTAACTAAATTATCCTGG<br>GTTTGAATTCCACCAATCTAG                 |
| ex3_53<br>56982_<br>x3 | CM00068<br>5.2/11960<br>3898-<br>11960396<br>6 | 14 | 0.002 | 28.2 | 3 | GCAGCTGTGGCTCAGTGGAAGAGCATCAGTCTGGGTATCAGAAGACCTA<br>GGTCCTAGCCCCAGCTGTA                     |
| ex3_53<br>62073_<br>x3 | GL00025<br>1.2/12401<br>9-123948               | 19 | 0.002 | 30.2 | 3 | GTGGATGTAGTTTAGTGGTAGAACGCGCGCTTTGCATGTATGAGGTCCCG<br>GTTTCGATCCCTGGCGTTTCCA                 |
| ex3_53<br>62529_<br>x3 | CM00067<br>2.2/58537<br>83-<br>5853711         | 14 | 0.005 | 28.2 | 3 | GGTTCCATAGTGTAGTGGTTATCACATCTGCTTTACACGCAGAAGGTCTG<br>GGTTCAAGCCCCAGTGAACCA                  |
| ex3_53<br>62805_<br>x3 | CM00066<br>3.2/14441<br>9267-<br>14441934<br>0 | 26 | ##### | 52   | 3 | GTCTCTGTGGCGCAATCGGTTAGCGCATTCCGGCTGTTAACCGAAAGGTTG<br>GTGGTTCGAGCCCACCCAGGGACG              |
| ex3_53<br>69090_<br>x3 | CM00067<br>3.2/63489<br>530-<br>63489598       | 13 | 0.008 | 26.3 | 3 | ATTAAGGTAGTATAGTAGAGTAAAATACTTCGAAGCCAAAAGATCTAGGTTT<br>GAATCCTAGCTTTCATG                    |
| ex3_53<br>72444_<br>x3 | CM00066<br>8.2/26594<br>874-<br>26594962       | 19 | ##### | 38.2 | 3 | CCTTCGATAGCTCAGCTGGTAGAGCGGAGGACTGTAGGGGTTTGAATGTG<br>GTCATCCTTAGGTGCTGGTTCGAATCCGGCTCGGAGGA |

|                        |                                                |    |        |      |   |                                                                                        |
|------------------------|------------------------------------------------|----|--------|------|---|----------------------------------------------------------------------------------------|
| ex3_53<br>73299_<br>x3 | CM00066<br>8.2/27672<br>531-<br>27672450       | 24 | #####  | 48.1 | 3 | GCTGTGATGGCCGAGTGGTTAAGGTGTTGGACTCGAAATCCAATGGGGGT<br>TCCCCGCGCAGGTTCAAATCCTGCTCACAGCG |
| ex3_53<br>74100_<br>x3 | CM00067<br>0.2/13375<br>5832-<br>13375576<br>7 | 15 | 0.0008 | 30.2 | 3 | GGTAAAATGACTGAATAAGCCTTAGACTGTAAATCTGAAGACAGAGGTCAA<br>GGCCTCTTTTTACCA                 |
| ex3_53<br>75492_<br>x3 | CM00066<br>3.2/16889<br>677-<br>16889750       | 21 | #####  | 42.1 | 3 | GTCTCTGTGGCGCAATCGGTTAGCGCGTTCGGCTGTTAACCGAAAGATTG<br>GTGGTTCGAGCCCACCCAGGGACG         |
| ex3_53<br>78639_<br>x3 | CM00067<br>8.2/31574<br>77-<br>3157405         | 33 | #####  | 65.9 | 3 | GCCCGGCTAGCTCAGTCGGTAGAGCATGAGACCCTTAATCTCAGGGTCGT<br>GGTTCGAGCCCCACGTTGGGCG           |
| ex3_53<br>79581_<br>x3 | CM00067<br>6.2/20633<br>006-<br>20633077       | 22 | #####  | 44.1 | 3 | GGCTCGTTGGTCTAGTGGTATGATTCTCGCTTTGGGTGCGAGAGGTCCCG<br>GGTCAAATCCCGGACGAGCCC            |
| ex3_53<br>79752_<br>x3 | CM00067<br>4.2/69827<br>047-<br>69826978       | 13 | 0.008  | 26.3 | 3 | GAGGGTATAGCTCAGAGGTAGAGCACTGGACTGCAGATCAAGAATATCAG<br>CTTCAGTTCAGCTGCCTTCA             |
| ex3_53<br>85773_<br>x3 | GL00025<br>1.2/33067<br>-32995                 | 35 | #####  | 69.9 | 3 | GACCACGTGGCCTAATGGATAAGGCGTCTGACTTCGGATCAGAAGATTGA<br>GGTTCGAATCCCTTCGTGGTTG           |
| ex3_53<br>92844_<br>x3 | CM00066<br>9.2/69333<br>643-<br>69333709       | 13 | 0.009  | 26.3 | 3 | GGTAAAATGGCTGAGCAAGCATTAGACTGTAAATCTGAAAACAGAGGTCAA<br>AGGTCTCTTTTTACCA                |
| ex3_53<br>94950_<br>x3 | CM00066<br>8.2/27553<br>494-<br>27553413       | 33 | #####  | 65.9 | 3 | GTAGTCGTGGCCGAGTGGTTAAGGTGATGGACTAGAAACCCATTGGGGTC<br>TCCCCGCGCAGGTTCAATCCTGCCGACTACG  |
| ex3_53<br>95280_<br>x3 | CM00066<br>3.2/16678<br>341-<br>16678271       | 20 | #####  | 40.1 | 3 | GCGTTGGTGGTTTGTAGTGGTAGAATTCTCGCCTCCCATGCGGGAGACCCGG<br>GTTCAATCCCGGCCACTGCA           |

|                        |                                                |    |       |      |   |                                                                                          |
|------------------------|------------------------------------------------|----|-------|------|---|------------------------------------------------------------------------------------------|
| ex3_53<br>95304_<br>x3 | CM00068<br>5.2/10278<br>6742-<br>10278666<br>9 | 13 | 0.008 | 26.3 | 3 | TAGAATATAGTGTATCAGGTAGCACAAAGATTTTTGAATTCTTAAGAGAGTA<br>GGTTCAATTCCTATAATCCTGT           |
| ex3_53<br>95505_<br>x3 | CM00067<br>6.2/20625<br>370-<br>20625451       | 31 | ##### | 61.9 | 3 | GGTAGTGTGGCCGAGCGGTCTAAGGCGCTGGATTTAGGCTCCAGTCTCTT<br>CGGGGGCGTGGGTTTCGAATCCCACCACTGCCA  |
| ex3_53<br>96711_<br>x3 | CM00067<br>8.2/31529<br>00-<br>3152972         | 33 | ##### | 65.9 | 3 | GCCCCGGTGGCCTAATGGATAAGGCATTGGCCTCCTAAGCCAGGGATTGT<br>GGTTTCGAGTCCCACCCGGGGTA            |
| ex3_53<br>98190_<br>x3 | CM00067<br>8.2/33709<br>82-<br>3370908         | 13 | 0.008 | 26.3 | 3 | TTTAAGATGGCAGACCCCGGCAATTACCTAAGACTTAAAACCTTAAAATCA<br>GAGGTTCAACTCCTCTTCTTAACA          |
| ex3_54<br>00143_<br>x3 | CM00067<br>4.2/56190<br>364-<br>56190445       | 24 | ##### | 48.1 | 3 | GTCACGGTGGCCGAGTGGTTAAGGCGTTGGACTCGAAATCCAATGGGGTT<br>TCCCCGCACAGGTTTCGAATCCTGTTTCGTGACG |
| ex3_54<br>00803_<br>x3 | GL00025<br>2.2/55434<br>-55363                 | 32 | ##### | 63.9 | 3 | GGGGGTGTAGCTCAGTGGTAGAGCGCATGCTTTGCATGTATGAGGTCCCG<br>GGTTCGATCCCCGGCACCTCCA             |
| ex3_54<br>04211_<br>x3 | CM00067<br>3.2/59551<br>059-<br>59550987       | 29 | ##### | 58   | 3 | GGTTCATAGTGTAGCGGTTATCACGTCTGCTTTACACGCAGAAGGTCCT<br>GGTTCGAGCCCCAGTGGAACCA              |
| ex3_54<br>07327_<br>x2 | CM00066<br>4.2/13027<br>3890-<br>13027382<br>6 | 14 | 0.002 | 28.2 | 2 | GGTAAAATGGCTGAGTAAGCATTAGACTGTAATCTAAAAACAGAGATCAAG<br>ACCTCTTTTTACCA                    |
| ex3_54<br>08059_<br>x2 | AC00494<br>1.2/32735<br>-32806                 | 18 | ##### | 36.2 | 2 | GGGGGUAGCUCAGGGGUAGAGCAUUUGACUGCAGAUCAAGAGGUCC<br>CUGGUUCAAAUCCAGGUGCCCCCU               |
| ex3_54<br>11057_<br>x2 | CM00068<br>1.2/12188<br>561-<br>12188634       | 18 | 0.003 | 28.2 | 2 | GGCTCTGTGGCTTTGTGGGTTAAAGTACTTGTCTGGCAAACAGGAGATGC<br>TGGATTTCAATCCCAGCAGGGCCT           |

|                        |                                                |    |       |      |   |                                                                                        |
|------------------------|------------------------------------------------|----|-------|------|---|----------------------------------------------------------------------------------------|
| ex3_54<br>11421_<br>x2 | CM00066<br>3.2/63634<br>501-<br>63634429       | 18 | ##### | 36.2 | 2 | GGTTGTACAGCTTAGAGCTTAAGAGCCTGGACTCTGGAATCAGAGTGTCT<br>GGTTCAAATCCCAGCTCTGCCA           |
| ex3_54<br>14039_<br>x2 | CM00067<br>9.2/75034<br>503-<br>75034431       | 33 | ##### | 65.9 | 2 | GCCCCAGTGGCCTAATGGATAAGGCACTGGCCTCCTAAGCCAGGGATTGT<br>GGTTTCGAGTCCCACCTGGGGTG          |
| ex3_54<br>16025_<br>x2 | CM00066<br>6.2/75046<br>18-<br>7504555         | 14 | 0.003 | 28.2 | 2 | GGCTGGGAAGCCAGCCCTGGGGTCCAGAGCCAGATGGATGTGGGTTCAA<br>ATCCCACCACAGCCA                   |
| ex3_54<br>16085_<br>x2 | CM00066<br>3.2/14358<br>4701-<br>14358477<br>2 | 14 | 0.003 | 28.2 | 2 | GGTTCATGGTGTAATGGTGAGGGCTTTGGACTCTGACTACAGTGATCAG<br>AGTTCAAGTCTCAGTGGGACCT            |
| ex3_54<br>19097_<br>x2 | GL00025<br>6.2/19126<br>-19197                 | 22 | ##### | 44.1 | 2 | GGGGTGTAGCTCAGTGGTAGAGCGCGTGCTTAGCATGCACGAGGCCCT<br>GGTTCAATCCCCAGCACCTCCA             |
| ex3_54<br>19179_<br>x2 | CM00067<br>9.2/81389<br>62-<br>8138881         | 14 | 0.003 | 28.2 | 2 | GCTGTGATGGCCGAGTGGTTAAGGCGTTGGACTCGAAATCCAATGGGGTC<br>TCCCCGCGCAGGTTCCAATCCTGCTCACAGCG |
| ex3_54<br>20237_<br>x2 | CM00067<br>2.2/69593<br>173-<br>69593241       | 15 | 0.001 | 30.2 | 2 | AAGGGCTTAGCTTAAGTAAAGCAATTGATTTGCATACAATTGATGTAGGAC<br>AGAGTCTTGCAGTCCTTA              |
| ex3_54<br>20999_<br>x2 | CM00066<br>3.2/12084<br>4335-<br>12084426<br>2 | 14 | 0.003 | 28.2 | 2 | GTCTCTGTGGCGTAGTCCGTTAGCGCGTTCCGGCTGTTAACCGAAAGGTTG<br>GTGGTTTCGAGCCCACCCAGGAACG       |
| ex3_54<br>22503_<br>x2 | CM00066<br>4.2/14022<br>4222-<br>14022415<br>2 | 14 | 0.002 | 28.2 | 2 | GTTAATGTAGCTTAATTATTCAAAGCAAGACACTGAAAATGTCTAGATGGGT<br>CTGCACAACCCCATAAACA            |
| ex3_54<br>23417_       | CM00066<br>5.2/14333                           | 15 | 0.001 | 30.2 | 2 | GGTGGTGAAGACAATGGACTGAGGAGTCTGTTGGACCTGGGTTCGAATCC<br>CAGCTCCACCA                      |

|                        |                                                |    |        |      |   |                                                                                |  |
|------------------------|------------------------------------------------|----|--------|------|---|--------------------------------------------------------------------------------|--|
| x2                     | 639-<br>14333699                               |    |        |      |   |                                                                                |  |
| ex3_54<br>23565_<br>x2 | CM00066<br>8.2/26701<br>483-<br>26701555       | 18 | 0.003  | 28.2 | 2 | GCCCTCTTAGCGCAGCTGGCAGCGCGTCAGTCTCATAATCTGAAGGTCCT<br>GAGTTCAAGCCTCAGAGAGGGCA  |  |
| ex3_54<br>23719_<br>x2 | CM00067<br>9.2/19605<br>432-<br>19605367       | 13 | 0.008  | 26.3 | 2 | GGTAAATGGCTGAGTAAGCATGAGACTGTAAATCTAAAGACAGAGGTCAA<br>GACCTCTTTTTACCA          |  |
| ex3_54<br>24303_<br>x2 | CM00067<br>9.2/82270<br>64-<br>8226991         | 20 | #####  | 40.1 | 2 | GGCCGGTTAGCTCAGTTGGTTAGAGCGTGGTGCTAATAACGCCAAGGTCG<br>CGGGTTCGAACCCCGTACGGGCCA |  |
| ex3_54<br>25343_<br>x2 | CM00067<br>1.2/64046<br>744-<br>64046678       | 15 | 0.0008 | 30.2 | 2 | GGTAAATGACTGAGTAGGGCATTAGACTGTACATCTAAAAACAGAGGTCA<br>AGGCCTGTTTTTACCA         |  |
| ex3_54<br>27603_<br>x2 | CM00066<br>7.2/78023<br>024-<br>78022952       | 14 | 0.002  | 28.2 | 2 | AGCTGTATATTATAGTGAATAAATGTGGACTTTGAAGTTAGATACACCTG<br>GTTCAAATCCCAGTGCTGTCA    |  |
| ex3_54<br>27833_<br>x2 | CM00067<br>6.2/73588<br>891-<br>73588832       | 18 | #####  | 36.2 | 2 | ATAGCTCAGTTGATAGAGCATCAGACTTTTAATCTGAGGGTCCAGGGTTCA<br>TGCCCTGT                |  |
| ex3_54<br>28411_<br>x2 | CM00066<br>9.2/14955<br>8042-<br>14955811<br>4 | 18 | 0.003  | 28.2 | 2 | GGGGGTATAGCTCAGGGCTAGAGCTTTTTGACTGTAGAGCAAGAGGTCCC<br>TGGTTCAAATCCAGGTTCTCCCT  |  |
| ex3_54<br>30567_<br>x2 | CM00067<br>0.2/98141<br>234-<br>98141302       | 13 | 0.009  | 26.3 | 2 | GGTCTTGCTCAGTGGAAGCCTCTGTCTGACCATACAGATGATCCAGGT<br>TCGAATCCTGGCAAGGCCA        |  |
| ex3_54<br>31425_<br>x2 | CM00066<br>9.2/14961<br>3136-<br>14961306      | 13 | 0.01   | 26.3 | 2 | GGGGGTATAGCTCAGGGGTAGAGCATTTGACTGCAAATCAAGAGGTCCCT<br>GATTCAAATCCAGGTGCCCCCT   |  |

|                        |                                                |    |       |      |   |                                                                                         |
|------------------------|------------------------------------------------|----|-------|------|---|-----------------------------------------------------------------------------------------|
| ex3_54<br>31661_<br>x2 | CM00066<br>5.2/12072<br>2386-<br>12072231<br>8 | 15 | 0.001 | 30.2 | 2 | GAAAAAGTCATAGAGGTTATGAGGTTGGCTTGAAACCAGTTTTAGGGGGTT<br>GGATTCCTTCCTTTTTTCG              |
| ex3_54<br>36995_<br>x2 | CM00066<br>3.2/93933<br>954-<br>93934017       | 13 | 0.008 | 26.3 | 2 | GGTAAAATGGCTGAGTAAGCTTTAGACTATAAATCTAAAGAGAGATTGAGC<br>TCTCTTTTTACCA                    |
| ex3_54<br>37543_<br>x2 | CM00066<br>7.2/12376<br>0805-<br>12376087<br>3 | 14 | 0.004 | 28.2 | 2 | GTTTATGTAGCTTAATTATTAAGCAAGACACTGAAAATGTCTAGACGGAC<br>TTATTACCCATAAACA                  |
| ex3_54<br>37809_<br>x2 | CM00066<br>8.2/27230<br>637-<br>27230555       | 13 | 0.008 | 26.3 | 2 | ACCGGGATGGCTGAGTGGTTAAGGCGTTGGACTTAAGATCCAATGGACAG<br>GTGTCCGCGTGGTTTCGAGCCCCACTCCCGGTA |
| ex3_54<br>39775_<br>x2 | CM00066<br>4.2/30054<br>702-<br>30054774       | 13 | 0.01  | 26.3 | 2 | GGGCCAGTGGCTCAATGGATAATGCGTCTGACTAAGAATCAGAAGATTCC<br>AGCCTTGACTCCTGGCTGGCTCA           |
| ex3_54<br>40527_<br>x2 | GL00025<br>1.2/21999<br>1-220062               | 26 | ##### | 52   | 2 | GGGGGTGTAGCTCAGTGGTAGAGCGCGTGCTTCGCATGTACGAGGCCCC<br>GGTTTCGACCCCCGGCTCCTCCA            |
| ex3_54<br>41541_<br>x2 | CM00066<br>3.2/16145<br>6332-<br>16145641<br>4 | 20 | ##### | 40.1 | 2 | GTCAGGATGGCCGAGCGGTCTAAGGCGCTGCGTTCAGGTCGCAGTCTCC<br>CCTGGAGGCGTGGTTTCGAATCCCCTCCTGACA  |
| ex3_54<br>41675_<br>x2 | CM00068<br>5.2/14343<br>4095-<br>14343402<br>4 | 14 | 0.004 | 28.2 | 2 | TAGGATATGGTATATTAGGTAGCACAAAGAATTTGAATTCTCAGGGGTAG<br>ATTCAATTCCTATAATTCTAG             |
| ex3_54<br>41751_<br>x2 | CM00067<br>7.2/58152<br>510-<br>58152578       | 13 | 0.008 | 26.3 | 2 | GTAATATAGTATAACCAAACATTAGATTGTGGATCTAATAACAGAAGTCT<br>GAACTTCTTATCTACT                  |

|                        |                                                |    |        |      |   |                                                                                                    |
|------------------------|------------------------------------------------|----|--------|------|---|----------------------------------------------------------------------------------------------------|
| ex3_54<br>42567_<br>x2 | CM00067<br>9.2/19605<br>267-<br>19605195       | 14 | 0.004  | 28.2 | 2 | TAGATTGAAGCCAATTGATTAGGGTGTTTAGATGTTAGCTAAATTTTCGTGG<br>GTTTGAATTCCACCAGCCTAG                      |
| ex3_54<br>43119_<br>x2 | CM00068<br>6.2/83715<br>87-<br>8371660         | 13 | 0.008  | 26.3 | 2 | GTTAAGATGGCAGAACCTGGCAGTTTCATAAACTTAAAGTTTATAATCAGA<br>GTTTCAACTCCTCTTCTTAACA                      |
| ex3_54<br>44403_<br>x2 | CM00066<br>8.2/27020<br>346-<br>27020439       | 31 | #####  | 61.9 | 2 | GCTCCAGTGGCGCAATCGGTTAGCGCGCGGTACTTATATGGCAGTATGTG<br>TGCGAGTGATGCCGAGGTTGTGAGTTCGAGCCTCACCTGGAGCA |
| ex3_54<br>45731_<br>x2 | CM00067<br>9.2/19603<br>208-<br>19603276       | 18 | #####  | 36.2 | 2 | GGAAATATGTCTGACAAAAGAATTACTTTGATAGAGTAAATAATAGAGGTTA<br>AAATCCTCTTATTTCTA                          |
| ex3_54<br>45887_<br>x2 | CM00066<br>7.2/15186<br>8584-<br>15186851<br>3 | 13 | 0.008  | 26.3 | 2 | GGTAGTGTAGTCTACTGGTTAAACGCTTGGGCTCTGACATTAACGTCCTGG<br>GTTCAAATCCCAGCTTTGTCA                       |
| ex3_54<br>45949_<br>x2 | CM00066<br>8.2/28607<br>156-<br>28607227       | 14 | 0.002  | 28.2 | 2 | GGGGGTGTAGCTCAGTGGTAGAGCGCGTGCTTAGCATGTACGAGGTCCC<br>GGTTCAATCCCCGGCACCTCCA                        |
| ex3_54<br>46901_<br>x2 | CM00067<br>0.2/67585<br>468-<br>67585398       | 19 | 0.0005 | 30.2 | 2 | ACTTTTAAAGGATGAGAGTCATCCGTTGGTCTTAAGAACCAAAAACACTGG<br>TGCAACTCCAAATAAAAGTA                        |
| ex3_54<br>50023_<br>x2 | CM00067<br>9.2/19603<br>345-<br>19603274       | 13 | 0.01   | 26.3 | 2 | TAGGATGTGGTGTAATAGGTGGCATGGAGAATTTTGGATTATCAGGGGTA<br>GTTTCAATTCCTATAGTTCTAG                       |
| ex3_54<br>50047_<br>x2 | CM00066<br>3.2/16161<br>2029-<br>16161194<br>6 | 17 | 0.01   | 26.3 | 2 | GTCAGGATGGCCGAGCAGTCTTAAGGCGCTGCGTTCAAATCGCACCTCC<br>GCTGGAGGCGTGGGTTTCGAATCCCACCTTTTGACA          |
| ex3_54<br>50269_       | CM00067<br>4.2/74457                           | 14 | 0.004  | 28.2 | 2 | CCATGGTGTAAATGGTAAGCACCTGGACTCTGAATCCAGCAACCAGAGTT<br>CCAGTCTCAGCGTGGA                             |

|                        |                                                |    |        |      |   |                                                                                        |  |
|------------------------|------------------------------------------------|----|--------|------|---|----------------------------------------------------------------------------------------|--|
| x2                     | 406-<br>74457471                               |    |        |      |   |                                                                                        |  |
| ex3_54<br>50479_<br>x2 | CM00066<br>8.2/78958<br>365-<br>78958293       | 20 | #####  | 40.1 | 2 | GCCAAAATAGCTCAGCTGGGAGAGCATTAGACTGAAGATCTAAAGGTCTC<br>TGGTTTGATCCTGGGTTTCAGAA          |  |
| ex3_54<br>50671_<br>x2 | CM00066<br>9.2/68098<br>326-<br>68098258       | 15 | 0.0005 | 30.2 | 2 | GAGAAGGTCATAGAGGTTATGGGATTGGCTTGAAACCAGTTTCTGGAGGT<br>TCCATTCTTTCCTTTTTTCG             |  |
| ex3_54<br>52895_<br>x2 | CM00067<br>8.2/29276<br>61-<br>2927733         | 14 | 0.003  | 28.2 | 2 | CCCCGGCTGGCTCAGTCAGTAGATCATGAGACTCTTAATCTCAGGGTCGT<br>GGTTACAGCCCCACACTGGGCG           |  |
| ex3_54<br>54069_<br>x2 | CM00068<br>5.2/55180<br>233-<br>55180304       | 13 | 0.008  | 26.3 | 2 | TAGGACATGGTGTGATAGGTAGCATGGAGAATTTTGGATTCTCAGGGGTA<br>GTTCAATTCCTACAGTTCTAG            |  |
| ex3_54<br>55487_<br>x2 | CM00066<br>8.2/18053<br>386-<br>18053467       | 19 | #####  | 38.2 | 2 | GGGCCAGTGGCGCAATGGATAACGCGTCTGACTACGGATCAGAAGATTCT<br>AGAAATAGTAACTAAGGGCAGAATTTGGCCCA |  |
| ex3_54<br>58237_<br>x2 | CM00067<br>6.2/61184<br>426-<br>61184490       | 15 | 0.0007 | 30.2 | 2 | GACAGTTTGGCTTAGTGGTTAAGAGCTTTGGTACCAGATGGAATGGGTTCA<br>AATCCCAACTCTCT                  |  |
| ex3_54<br>58827_<br>x2 | CM00066<br>9.2/57170<br>776-<br>57170844       | 14 | 0.002  | 28.2 | 2 | GTAATATAGTTTTAATCAAACATTAGATTGTGGGTCTAATAATAAAAGTCT<br>GCAACTTCTTATTTACT               |  |
| ex3_54<br>59403_<br>x2 | CM00066<br>3.2/14700<br>5272-<br>14700520<br>1 | 15 | 0.0008 | 30.2 | 2 | GGTTCCATGGTGTAATGGTGACCACTTTGGACTCTGAATACAGTGATCAGA<br>GTTCAAGTCTCACTGGAACCT           |  |
| ex3_54<br>59869_<br>x2 | CM00068<br>2.2/57358<br>446-<br>57358372       | 14 | 0.004  | 28.2 | 2 | GTAAAGATGGCAGAGCCCAGCGATTGCATAAACTTAACACTTTATAATCA<br>GAGTTCAACTCCTCTTCTTAACA          |  |

|                        |                                                |    |        |      |   |                                                                                                            |
|------------------------|------------------------------------------------|----|--------|------|---|------------------------------------------------------------------------------------------------------------|
| ex3_54<br>64725_<br>x2 | CM00067<br>2.2/36434<br>683-<br>36434615       | 15 | 0.001  | 30.2 | 2 | GTAATATAGTTTAGTCAAAATATTAGATTGTGGATCTGATAATAGAAGTCT<br>GTAACCTTCTTATTACT                                   |
| ex3_54<br>65079_<br>x2 | CM00067<br>6.2/20660<br>051-<br>20659958       | 17 | #####  | 34.2 | 2 | CCTTCGATAGCTCAGCTGGTAGAGCGGAGGACTGTAGACTGCGGAAACGT<br>TTGTGGACATCCTTAGGTTCGCTGGTTCAATCCGGCTCGAAGGA         |
| ex3_54<br>69309_<br>x2 | CM00066<br>6.2/84855<br>315-<br>84855245       | 16 | 0.0003 | 32.2 | 2 | AATATAGTACTGAGTGATGAAGAGCCTGGCTTGAATCAGATAGATGTAGT<br>TTTAAATTCTGTCTGTATTG                                 |
| ex3_54<br>70389_<br>x2 | CM00067<br>0.2/33015<br>028-<br>33015130       | 13 | 0.01   | 26.3 | 2 | GGAAATATGTCTGACAAAATAATTACTTTGATAGAGTAAACAATACAGGTTA<br>AAATCTCTCATTTCTAGAACTACAATAGAGGTTAAAATCCTCTTATTCTA |
| ex3_54<br>70511_<br>x2 | CM00067<br>8.2/70788<br>694-<br>70788764       | 37 | #####  | 73.8 | 2 | GCATTGGTGGTTCAGTGGTAGAATTCTCGCCTGCCATGCGGGCGGCCGG<br>GCTTCGATTCTGGCCAATGCA                                 |
| ex3_54<br>71367_<br>x2 | GL00025<br>3.2/24013<br>-23942                 | 21 | #####  | 42.1 | 2 | GGGGGTGTAGCTCAGTGGTAGAGCACATGCTTTGCATGTGTGAGGCCCC<br>GGTTTCGATCCCCGGCACCTCCA                               |
| ex3_54<br>71415_<br>x2 | CM00066<br>8.2/14225<br>7639-<br>14225770<br>9 | 13 | 0.008  | 26.3 | 2 | GCATGGGTGATTCAGTGGTAGAATTTTCACCTGCCATGCAGGAGGTCCAG<br>GTTCAATTCCTGGCCTATGCA                                |
| ex3_54<br>79377_<br>x2 | CM00066<br>3.2/16148<br>0566-<br>16148063<br>6 | 27 | #####  | 54   | 2 | GCATAGGTGGTTCAGTGGTAGAATTCTTGCCTGCCACGCAGGAGGCCAG<br>GTTTGATTCTGGCCCATGCA                                  |
| ex3_54<br>81289_<br>x2 | CM00066<br>4.2/20121<br>3158-<br>20121308<br>8 | 14 | 0.002  | 28.2 | 2 | ACTTTTAGAGGATGAGAGTTATCCATTGGTCTTAGGAACCAAAAATATTGG<br>TGCAACTCCAAATAAAAGTA                                |
| ex3_54<br>83565_       | CM00067<br>0.2/79428                           | 13 | 0.008  | 26.3 | 2 | GGCACTGTAGTTTGGATTGAGAAACACAGGCTTTAGAGGCAGAAGTTCTG<br>GGTTCAAACCCAGCATTGCCA                                |

|                        |                                                |    |        |      |   |                                                                                                     |  |
|------------------------|------------------------------------------------|----|--------|------|---|-----------------------------------------------------------------------------------------------------|--|
| x2                     | 812-<br>79428742                               |    |        |      |   |                                                                                                     |  |
| ex3_54<br>87481_<br>x2 | CM00067<br>6.2/20653<br>192-<br>20653099       | 15 | 0.0008 | 30.2 | 2 | CCTTCGATAGCTCAGCTGGTAGAGCGGAGGACTGTAGCCTGTAGAAACAT<br>TTGTGGACATCCTTAGGTTCGCTGGTTCGATTCCGGCTCGAAGGA |  |
| ex3_54<br>91011_<br>x2 | CM00066<br>3.2/14366<br>1253-<br>14366118<br>2 | 26 | #####  | 52   | 2 | GCCATGATCGTATAGTGGTTAGTACTCTGCGCTGTGGCCGCAGCAACCTC<br>GATTCGAATCCGAGTCACGGCA                        |  |
| ex3_54<br>91347_<br>x2 | CM00066<br>4.2/15526<br>3777-<br>15526384<br>2 | 13 | 0.008  | 26.3 | 2 | CGTAAATGGCTGAGTAAGGCATTAGACTGTAAATCTAAAGACAGAGGCTA<br>AACCTCTTTTTACCA                               |  |
| ex3_54<br>91915_<br>x2 | CM00068<br>1.2/35575<br>848-<br>35575920       | 13 | 0.008  | 26.3 | 2 | GCCCAGCTAGCTCAGTCGGTAGAGCATAAGACTCTTAATCTCAGGGTTGT<br>GGATTCGTGCCCCATGCTGGGTG                       |  |
| ex3_54<br>92517_<br>x2 | CM00066<br>4.2/11551<br>708-<br>11551764       | 13 | 0.009  | 26.3 | 2 | TGGTCTAGTGGTTAGGATTCAGCGCTCCCACCGCCGCAGCCCGGGTTTCG<br>ATTCCCGG                                      |  |
| ex3_54<br>94493_<br>x2 | CM00067<br>0.2/65697<br>384-<br>65697297       | 15 | 0.001  | 30.2 | 2 | TCTTCAATAGCTCAGCTGGTAGAGCGGAGGACTGTAGGTGCACGCCCGTG<br>GCCATTCTTAGGTGCTGGTTTGATTCCGACTTGGAGAG        |  |
| ex3_54<br>94815_<br>x2 | GL00025<br>1.2/18581<br>4-185743               | 13 | 0.009  | 26.3 | 2 | GGGGGTGTAGATCAGTGGTAGAGCGCGTGCTTCGCATGTACGAGGTCCC<br>TGTTCAATCCCTGGCACCTCCA                         |  |
| ex3_54<br>95949_<br>x2 | CM00067<br>9.2/75035<br>113-<br>75035185       | 31 | #####  | 61.9 | 2 | GACCGCGTGGCCTAATGGATAAGGCGTCTGACTTCGGATCAGAAGATTGA<br>GGTTCGAGTCCCTTCGTGGTTCG                       |  |
| ex3_54<br>95967_<br>x2 | CM00068<br>2.2/50335<br>886-<br>50335805       | 14 | 0.003  | 28.2 | 2 | GGTAGGGTGGCCGAGCGGTCTAAGGCACTGTATTAAGACTCCAGTCTCTT<br>CAGAGGCATGGGTTTGAATCCCACTGCTGCCA              |  |

|                        |                                                |    |        |      |   |                                                                                          |
|------------------------|------------------------------------------------|----|--------|------|---|------------------------------------------------------------------------------------------|
| ex3_54<br>96939_<br>x2 | CM00066<br>8.2/27664<br>766-<br>27664841       | 13 | 0.009  | 26.3 | 2 | GCCGAAATAGCTCAATTGGGAGAGTGTTAGACTGAAGATCTTCTGCAGGT<br>CTCTGGTTCAATTCCGGGTTTTGACA         |
| ex3_54<br>97183_<br>x2 | CM00066<br>8.2/28213<br>037-<br>28213118       | 35 | #####  | 69.9 | 2 | GACGAGGTGGCCGAGTGGTTAAGGCGATGGACTGCTAATCCATTGTGCTC<br>TGCACACGTGGGTTCGAATCCCATCCTCGTCG   |
| ex3_54<br>99419_<br>x2 | CM00067<br>3.2/59551<br>755-<br>59551837       | 20 | 0.0002 | 32.2 | 2 | ACCAGAATGGCCGAGTGGTTAAGGCGTTGGACTTAAGATCCAATGGATTC<br>ATATCCGCGTGGGTTCCGAACCCCACTTCTGGTA |
| ex3_55<br>00023_<br>x2 | CM00067<br>3.2/50274<br>779-<br>50274708       | 13 | 0.01   | 26.3 | 2 | GGGGGTGTAGCTCAGTGGTAGAGCGGATGCTTTGCATGTATGAGACTTTG<br>GGTTGGATCCCCAGCACCTCCA             |
| ex3_55<br>00501_<br>x2 | CM00067<br>1.2/11019<br>8523-<br>11019859<br>5 | 15 | 0.0005 | 30.2 | 2 | GGCCGTGTGGCCTAATGGATAAGGCGTCTGACTTCGGATCAAAGATTGC<br>AGGTTTGAGTTCTGCCACGGTCG             |
| ex3_55<br>01479_<br>x2 | CM00067<br>8.2/31649<br>38-<br>3165010         | 13 | 0.008  | 26.3 | 2 | GCCTGGCTAGCTCAGTCGGCAAAGCATGAGACTCTTAATCTCAGGGTCGT<br>GGGCTCGAGCTCCATGTTGGGCG            |
| ex3_55<br>01579_<br>x2 | CM00066<br>5.2/15211<br>466-<br>15211541       | 15 | 0.0007 | 30.2 | 2 | GCCTGGATAGCTCCTTCGGTAGAGCATCATCAGACTTTTAATGTGAGGGTC<br>CAGGGTTCAAGTTCCTGTTTGGGCG         |
| ex3_55<br>03537_<br>x2 | CM00066<br>3.2/14648<br>8866-<br>14648893<br>6 | 18 | 0.003  | 28.2 | 2 | GCGTCAGTGGTTTAGTGGTGAATTCCTGCCTCCCATGCACGAGATCCGT<br>GTTCAACTCCTGGTTGGTGCA               |
| ex3_55<br>04643_<br>x2 | GL00025<br>6.2/1818-<br>1745                   | 19 | #####  | 38.2 | 2 | GCCTGGGTAGCTCAGTCGGTAGAGCTATCAGACTTTTAGCCTGAGGATTC<br>AGGGTTCAATCCCTTGCTGGGGCG           |
| ex3_55<br>14431_<br>x2 | CM00066<br>4.2/22332<br>1669-                  | 21 | #####  | 34.2 | 2 | GTTGGGGTAACTCAGTTGGTAGAGTAGCAGACTTTTCATCTGAGGGTCCA<br>GGGTTTAAGTCCATGTCCAGGCA            |

|                        |                                                |    |       |      |   |                                                                                 |  |
|------------------------|------------------------------------------------|----|-------|------|---|---------------------------------------------------------------------------------|--|
|                        | 22332159<br>7                                  |    |       |      |   |                                                                                 |  |
| ex3_55<br>18805_<br>x2 | CM00068<br>5.2/25262<br>043-<br>25261972       | 14 | 0.003 | 28.2 | 2 | AGTCAAGTGGTTT<br>AGTGAAAGAACATTGGATTGGAAGTCAAGAGGCCTG<br>GATTCTTGCTCCAGCTTCACCA |  |
| ex3_55<br>19329_<br>x2 | CM00066<br>4.2/21177<br>8080-<br>21177800<br>8 | 14 | 0.004 | 28.2 | 2 | TAGATTGAAGCCAGTTGATTAGGGGGTTTAACTGTAACTAAATTTTCGTG<br>GTTTTGAATTCCACCAGTCTAG    |  |
| ex3_55<br>24437_<br>x2 | CM00066<br>9.2/14954<br>6540-<br>14954661<br>1 | 14 | 0.003 | 28.2 | 2 | GGGGGTATAGCTCAGGGGTAGAGCACTTGACTGCAGATCAAGAAGTCCTT<br>GTTCAAATCCAGGTGCCCCCT     |  |
| ex3_55<br>26159_<br>x2 | CM00066<br>4.2/13138<br>2569-<br>13138263<br>8 | 15 | 0.001 | 30.2 | 2 | GAGAAGGTCATAGAGGTTATGGGATTGGCTTGAAACCAGTCTCTGGGGGG<br>TTCGATTCCCTCCTTTTTCA      |  |
| ex3_55<br>32505_<br>x2 | CM00066<br>9.2/14941<br>5209-<br>14941513<br>8 | 13 | 0.01  | 26.3 | 2 | GGGGGTATAGCTTAGCGGTAGAGCATTGACTGCAGATCAAGAGGTCCCC<br>GTTCAAATCCGGGTGCCCCCT      |  |
| ex3_55<br>33897_<br>x2 | CM00067<br>9.2/15505<br>371-<br>15505444       | 18 | 0.002 | 28.2 | 2 | GGCAGTGACGCCTACTGGTTTAGAGCACAGATTCTAGATCGAGACATTCC<br>TGGTTCAAATCCCAGCACTGTTG   |  |
| ex3_55<br>38919_<br>x2 | CM00066<br>8.2/57861<br>238-<br>57861166       | 14 | 0.003 | 28.2 | 2 | GGGGAATTAGCGCAAGTGGTAGAGTGCTTGCTTAGCATGCAAGAGGTAGT<br>GGGATCGATGCCACATTCTCCA    |  |
| ex3_55<br>40499_<br>x2 | CM00067<br>9.2/22528<br>921-<br>22528853       | 14 | 0.004 | 28.2 | 2 | GAAAAAGTCATAGGGGTTATGAGGCTGGCTTGAAACCAGCCTTAGGAGGT<br>TCAATTCCTTCTTTTTTG        |  |

|                        |                                                |    |       |      |   |                                                                                 |
|------------------------|------------------------------------------------|----|-------|------|---|---------------------------------------------------------------------------------|
| ex3_55<br>41939_<br>x2 | GL00025<br>4.2/88976<br>-88903                 | 13 | 0.008 | 26.3 | 2 | GCCGAAATAGCTCAGTGGGGAGAGCGTTAGACTGAAGATCTTAAAGGTCC<br>CTGGTTCAATCCCGGGTTTCGGCA  |
| ex3_55<br>42753_<br>x2 | CM00066<br>9.2/14969<br>1252-<br>14969118<br>1 | 22 | ##### | 36.2 | 2 | GGGGATATAGCTCAGGGGTAGAGCATTGACTGCAGATCAAGAGGTCCCC<br>GGTTCAAATCCGGGTGCCCCC      |
| ex3_55<br>43579_<br>x2 | CM00066<br>4.2/84858<br>752-<br>84858824       | 14 | 0.002 | 28.2 | 2 | GGTTCATAGTGTAACAGTTATCATGTCTGCTTTACACACTGAAGGTCCTG<br>GGTTCAAACCTCAGTGGAACCA    |
| ex3_55<br>49429_<br>x2 | KI270765.<br>1/51018-<br>50945                 | 14 | 0.005 | 28.2 | 2 | GTCTCTGTGGCACAATCGGTTAGCGCGTTTGGCTGTTAATCTAAAGTTTGG<br>TGGTTAGAGCCCACTGAGGGACG  |
| ex3_55<br>52069_<br>x2 | CM00066<br>9.2/14931<br>0190-<br>14931026<br>1 | 29 | ##### | 50.1 | 2 | GGGGGCATAGCTCAGTGGTAGAGCATTGACTGCAGATCAAGAGGTCCCT<br>GGTTCAAATCCAGGTGCCCCCT     |
| ex3_55<br>57829_<br>x2 | CM00066<br>4.2/14309<br>6757-<br>14309668<br>9 | 14 | 0.002 | 28.2 | 2 | GTAATATAGTTTAAACCAAAACATTAGATTGTGAATCTAATAATAGAAGCCT<br>GTAACCTTCTTATCTACC      |
| ex3_55<br>59187_<br>x2 | CM00066<br>3.2/14637<br>0101-<br>14637017<br>4 | 14 | 0.003 | 28.2 | 2 | GTCTCTGTGGCGCAATCGGTTAGCGCGTTCCGGCTGTTAACCGCAAGGTTG<br>GTGGTTCCAGCCCACCCAGGGACG |
| ex3_55<br>60247_<br>x2 | CM00066<br>9.2/67399<br>631-<br>67399560       | 14 | 0.004 | 28.2 | 2 | GGCCTCATGGTGCAACAGTAGTGTGTCTGACTCCAGATCAGAAGGTTGTA<br>TGTTCAAATCACGTAGGGGTCA    |
| ex3_55<br>61195_<br>x2 | CM00066<br>8.2/27303<br>860-<br>27303789       | 13 | 0.008 | 26.3 | 2 | GGCAGAGTGGTGCAGCGGAAGCGTGCTGGGCCCGTAACCCAGAGGTCAA<br>TGGATCGAAGCCATCCTTGGCTA    |
| ex3_55<br>62965_<br>x2 | CM00068<br>5.2/55180                           | 13 | 0.008 | 26.3 | 2 | GGAAATATGTCTGACAAAAGAACTACTTTGATAGAGTAAACAACAGAGGTT<br>AAAATCCTCTTATTTCTA       |

|                        |                                           |    |        |      |   |                                                                                                       |  |
|------------------------|-------------------------------------------|----|--------|------|---|-------------------------------------------------------------------------------------------------------|--|
| x2                     | 370-<br>55180302                          |    |        |      |   |                                                                                                       |  |
| ex3_55<br>66731_<br>x2 | CM00067<br>3.2/39766<br>947-<br>39766879  | 13 | 0.01   | 26.3 | 2 | GAGAGAGTCATAGAGGGTATGGGATTGGCTTGAAACCAGTTTCTGGAGGT<br>TTGATTCCTTCCTTTCTCG                             |  |
| ex3_55<br>66975_<br>x2 | CM00066<br>7.2/18109<br>7555-<br>18109747 | 36 | #####  | 71.9 | 2 | GGTAGCGTGGCCGAGCGGTCTAAGGCGCTGGATTAAGGCTCCAGTCTCTT<br>CGGAGGCGTGGTTTCGAATCCCACCGCTGCCA                |  |
| ex3_55<br>68425_<br>x2 | CM00066<br>9.2/14964<br>7026-<br>14964695 | 16 | 0.0002 | 32.2 | 2 | GGGGGTATAGCTTAGGGGTAGAGCATTTGACTGCAGATCAAAGGTCCCT<br>GTTCAAATCCAGGTGCCCTT                             |  |
| ex3_55<br>70075_<br>x2 | CM00067<br>8.2/31806<br>26-<br>3180554    | 15 | 0.0006 | 30.2 | 2 | GCCCGGCTAGCTCAGTCGATAGAGCATGAGACTCTTAATCTCAGGGTCGT<br>GGTTTCGAGCCGCACGTTGGGCG                         |  |
| ex3_55<br>75289_<br>x2 | KI270713.<br>1/28828-<br>28755            | 14 | 0.003  | 28.2 | 2 | GTCTCTGTGGCGCAGTCGGTTAGCGCGTTTCGGCTGTTAACCGGAAGGTTG<br>GTGGTTTCGAGACCACCCAAGGACG                      |  |
| ex3_55<br>77181_<br>x2 | CM00067<br>3.2/92752<br>43-<br>9275316    | 14 | 0.002  | 28.2 | 2 | GCCTCCTTAGTGAGTAGGTAGCGCATCAGTCTCAAATCTGAATGGTCCT<br>GAGTTCAAGCCTCAGAGGGGGCA                          |  |
| ex3_55<br>78923_<br>x2 | CM00066<br>4.2/42810<br>536-<br>42810628  | 30 | #####  | 60   | 2 | GCTCCAGTGGCGCAATCGGTTAGCGCGCGGTACTIONTATACAGCAGTACATG<br>CAGAGCAATGCCGAGGTTGTGAGTTTCGAGCCTCACCTGGAGCA |  |
| ex3_55<br>80905_<br>x2 | CM00067<br>0.2/18537<br>373-<br>18537307  | 13 | 0.008  | 26.3 | 2 | GGTAATATAGCTTAAGAGCCGTGGGTTTTGAACTCAGATTGCCTTGGTTCA<br>AATCCGAGTTTCATTT                               |  |
| ex3_55<br>81877_<br>x2 | CM00068<br>1.2/41242<br>309-<br>41242237  | 13 | 0.008  | 26.3 | 2 | GCCAGGATAGTTCAGGTGGTAGAGCATCAGACTTTTAACTGAGGGTTCA<br>GGTTCAAGTCTCTGTTTGGGCG                           |  |

|                        |                                                |    |       |      |   |                                                                                                     |
|------------------------|------------------------------------------------|----|-------|------|---|-----------------------------------------------------------------------------------------------------|
| ex3_55<br>88729_<br>x2 | CM00066<br>5.2/10689<br>4213-<br>10689414<br>3 | 13 | 0.008 | 26.3 | 2 | ACTTTTAAAGGATAGGAGTTATCTATTGATCTTAGGAACCAAAAACATTGGT<br>TCAACTCCAAGTAAAGGTA                         |
| ex3_55<br>89775_<br>x2 | CM00066<br>8.2/28537<br>590-<br>28537683       | 14 | 0.004 | 28.2 | 2 | GCTCCAGTGGCGCAATCGGTTAGCGCGCGGTTACTTATAAGACAGTGCACC<br>TGTGAGCAATGCCGAGGTTGTGAGTTCAAGCCTCACCTGGAGCA |
| ex3_55<br>96973_<br>x2 | CM00066<br>8.2/27505<br>909-<br>27505828       | 19 | ##### | 38.2 | 2 | GTAGTCGTGGCCGAGTGGTTAAGGCGATGGACTTGAAATCCATTGGGGTT<br>TCCCCGCGCAGGTTCAATCCTGTCTGGCTACG              |
| ex3_56<br>01723_<br>x2 | CM00067<br>9.2/22525<br>692-<br>22525760       | 14 | 0.003 | 28.2 | 2 | AGAAATATGTCTGACAAAAGAGTGACTTTGATAGAGTAAATAATAGAGGTTT<br>GAATCCTCTTATTCTA                            |
| ex3_56<br>01989_<br>x2 | CM00066<br>5.2/16623<br>3278-<br>16623320<br>8 | 14 | 0.004 | 28.2 | 2 | GTTGATGTGGTTTAAATATGTTAAAACAAGGCATTGAAAATGTCTAGATGAGT<br>TCTCATAGCTCCATAAACA                        |
| ex3_56<br>03859_<br>x2 | CM00067<br>8.2/31919<br>89-<br>3192060         | 18 | ##### | 36.2 | 2 | GGCTCGTTGGTCTAGGGGTATGATTCTCGCTTAGGATGCGAGAGGTCCCG<br>GGTTCAAATCCCGGACGAGCCC                        |
| ex3_56<br>05025_<br>x2 | CM00066<br>9.2/14936<br>3270-<br>14936320<br>7 | 14 | 0.002 | 28.2 | 2 | GTGGATATAGTCTGCATTTGACTGCAAATTAAGAAGTCTCTGGTTCAAAT<br>CCAGCTGTCCCCT                                 |
| ex3_56<br>08453_<br>x2 | CM00066<br>3.2/14970<br>1404-<br>14970133<br>3 | 14 | 0.005 | 28.2 | 2 | TGCATGGTTGTCTAGTGGCTAGGATTCGGTGCTGAAAGCGCCACGGCCCG<br>GGTTCGATTCCCGGTCAGGGAA                        |
| ex3_56<br>09899_<br>x2 | CM00066<br>3.2/20547<br>4143-<br>20547421      | 13 | 0.008 | 26.3 | 2 | GCCCGGAGAGCTCAGTGGGTAGAGCATCAGACTTTTAAATCTGAGGGTCCA<br>GGTTCAAGTCTCTCGTTCGGGCA                      |

5

|                        |                                                |    |       |      |   |                                                                                                                                                                                           |
|------------------------|------------------------------------------------|----|-------|------|---|-------------------------------------------------------------------------------------------------------------------------------------------------------------------------------------------|
| ex3_56<br>11225_<br>x2 | CM00066<br>8.2/57813<br>562-<br>57813490       | 13 | 0.008 | 26.3 | 2 | GAGGAATTAGCTCAGGCGGTAGAGCGCTCGCTTAGCATGCGAGAGGTAG<br>CGGGATCGACGCCCGCATTCTCCA                                                                                                             |
| ex3_56<br>14553_<br>x2 | CM00066<br>4.2/11702<br>5004-<br>11702493<br>3 | 18 | 0.004 | 28.2 | 2 | TAGGACATGGTGTAATAGGTAGAATGGAGAATTTTGAATTCTCAGGGGTAG<br>GTTCAATTCCTATAGTTCTAG                                                                                                              |
| ex3_56<br>24589_<br>x2 | CM00066<br>7.2/15260<br>9036-<br>15260921<br>1 | 14 | 0.003 | 28.2 | 2 | GGCTGTATAGCTCAGTGGTAGAGCATTGACTACAGAATCCTATACTCAGG<br>GGAAGGAGAAGTGGGGTTTTCTCAGTGGGTCAAAGGACTTGTAGTGGTAA<br>ATCAAAAGCAACTCTATAAGCTATGTAACAACTTTAAAGTCATATGTAGCT<br>GGTTCAAATCCTGTTTCTGCCA |
| ex3_56<br>25569_<br>x2 | CM00066<br>7.2/53964<br>07-<br>5396475         | 13 | 0.008 | 26.3 | 2 | GAAGAAGTCATGGAGGTTATGGGATTGGCTTGAAACCAGTCTTTGGGGGT<br>TCAATTCCTTCTTTTCA                                                                                                                   |
| ex3_56<br>27889_<br>x2 | CM00066<br>8.2/27668<br>583-<br>27668656       | 20 | ##### | 40.1 | 2 | GGCCGGTTAGCTCAGTCGGCTAGAGCGTGGTGCTAATAACGCCAAGGTC<br>GCGGGTTCGATCCCCGTACGGGCCA                                                                                                            |
| ex3_56<br>29575_<br>x2 | CM00066<br>9.2/14180<br>5039-<br>14180496<br>5 | 13 | 0.009 | 26.3 | 2 | GTTAAGATGGCAGAGCCCGGCAATTGCATAAACTTAAACTTTATAACTG<br>GAGGTTCAACTCCTCTTCTTCTTC                                                                                                             |
| ex3_56<br>33114_<br>x1 | CM00068<br>6.2/83721<br>71-<br>8372101         | 14 | 0.003 | 28.2 | 1 | TAGGACGTGGTGTAATAGGTAGCACAGAGAATTTTGGATTCTCAGGTGCA<br>GGTTCAATTCCTATATTCTAG                                                                                                               |
| ex3_56<br>33996_<br>x1 | CM00066<br>9.2/57187<br>595-<br>57187527       | 13 | 0.008 | 26.3 | 1 | CATGGCTTAGCTTAATTAAGTGATTGATTTGCATTCAATTGATGCAGAATA<br>CAGTTTTGCAGTCTTTA                                                                                                                  |
| ex3_56<br>36195_<br>x1 | GL00025<br>5.2/21015<br>6-210228               | 22 | ##### | 44.1 | 1 | GCCTCCTTAGCGCAGTAGGCAGCGCTCAGTCTCATAATCTGAAGGTCCT<br>GAGCTCGAACCTCAGAGGGGCCA                                                                                                              |

|                        |                                                |    |        |      |   |                                                                                |
|------------------------|------------------------------------------------|----|--------|------|---|--------------------------------------------------------------------------------|
| ex3_56<br>37158_<br>x1 | CM00066<br>7.2/10004<br>8984-<br>10004891<br>6 | 16 | 0.0002 | 32.2 | 1 | GTAAATATAGTTTAAACCAAAACATCAGATTGTGAATCTGATAACAGAGGCTC<br>ACAGCCCCTTATTTACC     |
| ex3_56<br>37778_<br>x1 | CM00066<br>8.2/57808<br>645-<br>57808718       | 14 | 0.005  | 28.2 | 1 | GTCTTCTTAGCGCAGTGAGCAGCGGTCAGTCTCATAATCTGAAGGTCCT<br>GATGTTTCGAGCCTGAGAAAAGGCA |
| ex3_56<br>38421_<br>x1 | CM00066<br>3.2/12047<br>6923-<br>12047685<br>2 | 18 | 0.002  | 28.2 | 1 | GGTTCATGGTGTAATGGTGAGCACTTTGGACTCTGAATACAGTGATCAGA<br>GTTCAAGTCTCACTGGGACCT    |
| ex3_56<br>39977_<br>x1 | CM00067<br>9.2/22524<br>659-<br>22524733       | 13 | 0.009  | 26.3 | 1 | GTTAAGATGGCAGACCCCAGCAATTGCATAAAATTTAAACTTTACAACCA<br>GAGGTTCAACCCCTCTTCTTAACA |
| ex3_56<br>40248_<br>x1 | CM00066<br>3.2/14371<br>7365-<br>14371729<br>2 | 13 | 0.009  | 26.3 | 1 | GTCTCTGTGGCACAATCGGTTAGAGCGTTCGGCTGTTAATCTAAAGGTTG<br>GTGGCTAGAACCCACTGAGGGACG |
| ex3_56<br>40817_<br>x1 | CM00068<br>5.2/55178<br>989-<br>55179057       | 13 | 0.009  | 26.3 | 1 | AAGGGCTTAGCTTAATTAAGGTGGTTGATTTGCATTCAATTGATGCAGAAT<br>AGAGTCTTGCAGTCCTCA      |
| ex3_56<br>42340_<br>x1 | CM00066<br>4.2/82819<br>272-<br>82819338       | 13 | 0.01   | 26.3 | 1 | GCCCTTGTAGTATAATTCAATACTCTGGTCTTGTAACCAGAAATGGAGGA<br>TCTCCTCCCCAGGACA         |
| ex3_56<br>42649_<br>x1 | CM00068<br>4.2/36179<br>392-<br>36179460       | 13 | 0.01   | 26.3 | 1 | GGAAATATGTCTGATAAGAGAGTTACTTTGACAGAGTAAATTACAGAGGTT<br>TAAATCTTCCTATTTCTA      |
| ex3_56<br>42870_<br>x1 | CM00066<br>3.2/14963<br>9453-<br>14963952<br>6 | 14 | 0.003  | 28.2 | 1 | GTCTCTGTGGTGCAATCGGTTAGCGCGTTTGACTGTTAACTGAAAGGTTG<br>GTGGTGCAAGCCCATCCAGGGATG |

|                        |                                                |    |        |      |   |                                                                                                |
|------------------------|------------------------------------------------|----|--------|------|---|------------------------------------------------------------------------------------------------|
| ex3_56<br>44466_<br>x1 | CM00066<br>4.2/27050<br>782-<br>27050870       | 14 | 0.005  | 28.2 | 1 | CCTTCGATAGCTCAGTTGGTAGAGCGGAGGACTGTAGTGGATAGGGCGTG<br>GCAATCCTTAGGTTCGCTGGTTCGATTCCGGCTCGAAGGA |
| ex3_56<br>47425_<br>x1 | CM00066<br>4.2/13138<br>4079-<br>13138414<br>3 | 19 | 0.0008 | 30.2 | 1 | GGTAAAATGGCTGAGTAAGCATTAGACTGTAATCTGAAAACAGAGGTCAAG<br>ACCTCTTTTTACCA                          |
| ex3_56<br>47648_<br>x1 | CM00068<br>6.2/11133<br>337-<br>11133271       | 17 | 0.009  | 26.3 | 1 | GGTAAAATGACTAAGTAGGGCATTAGACTGTACATCTAAAAACAGAGGTCA<br>AGGCCTGTTTTACCA                         |
| ex3_56<br>47796_<br>x1 | CM00067<br>4.2/41699<br>391-<br>41699323       | 18 | #####  | 36.2 | 1 | AGAAATATGTCTGATAAAAGAGTTACTCTGATAGAGTAAATAATAGAGGTTT<br>AAACCCTCTTATTCTA                       |
| ex3_56<br>48031_<br>x1 | CM00067<br>3.2/59556<br>429-<br>59556501       | 14 | 0.003  | 28.2 | 1 | GCCCGGATAGCTCAGTCGGTAGAGCATCAGACTTTTAATCTGAGGGTCCG<br>GGTTCAAGTCCCTGTTCCGGCG                   |
| ex3_56<br>48187_<br>x1 | CM00067<br>3.2/20200<br>305-<br>20200250       | 14 | 0.003  | 28.2 | 1 | GAAGGTATAGCTCAGGGGTAGAGCATTTGACTGCAGATCAAGAAAATACT<br>CCTTTG                                   |
| ex3_56<br>48333_<br>x1 | CM00066<br>7.2/14239<br>4494-<br>14239442<br>3 | 27 | #####  | 54   | 1 | TCCTCATCAGTATAGTGGTGAGTATCCCCGCCTGTCACGCGGGAGACTGG<br>GGTTCGATTCCCTGAGGAGGAG                   |
| ex3_56<br>50116_<br>x1 | CM00067<br>9.2/38833<br>793-<br>38833722       | 14 | 0.003  | 28.2 | 1 | GGGGGTAGGGCTCAGGGATAGAGCATTTGACTGCAGATCAAGAGGTCCC<br>CGTTTCGAATCTAGGTGCCCCCT                   |
| ex3_56<br>51239_<br>x1 | CM00067<br>0.2/88133<br>080-<br>88133007       | 13 | 0.009  | 26.3 | 1 | GGTACAGTGTTAAAGGGGAGAAAATTGCTGACTTTGAATACAGTAGACCT<br>AGGTTTGAATCCTGGCTTTACCA                  |
| ex3_56<br>52066_<br>x1 | CM00066<br>8.2/27091                           | 36 | #####  | 71.9 | 1 | GGCTCGTTGGTCTAGGGGTATGATTCTCGCTTCGGGTGTGAGAGGTCCCG<br>GGTCAAATCCCGACGAGCCC                     |

|                        |                                                |    |       |      |   |                                                                                                                    |
|------------------------|------------------------------------------------|----|-------|------|---|--------------------------------------------------------------------------------------------------------------------|
| x1                     | 742-<br>27091813                               |    |       |      |   |                                                                                                                    |
| ex3_56<br>52929_<br>x1 | CM00066<br>8.2/94447<br>329-<br>94447261       | 13 | 0.008 | 26.3 | 1 | AGAAATATGTCTGACAAAAGAGTTACTTTGATATAATAAATTATAGAGG TTC<br>AAACCCTCTTATTTCTA                                         |
| ex3_56<br>57489_<br>x1 | CM00066<br>4.2/14021<br>7252-<br>14021731<br>7 | 13 | 0.008 | 26.3 | 1 | GGTAAAATGACTGAGTAAACATTAGACTGTAAATCTAAATACAGAGGCCAA<br>GGCCTCTTTTTACCA                                             |
| ex3_56<br>60539_<br>x1 | CM00067<br>9.2/81203<br>95-<br>8120314         | 31 | ##### | 61.9 | 1 | GGTAGCGTGGCCGAGCGGTCTAAGGCGCTGGATTTAGGCTCCAGTCTCTT<br>CGGAGGCGTGGGTTTGAATCCCACCGCTGCCA                             |
| ex3_56<br>70254_<br>x1 | CM00066<br>8.2/27602<br>675-<br>27602569       | 34 | ##### | 67.9 | 1 | GTCAGGATGGCCGAGTGGTCTAAGGCGCCAGACTCAAGTTGCTACTTCCC<br>AGGTTTGGGGCTTCTGGTCTCCGCATGGAGGCGTGGGTTTGAATCCCCT<br>TCTGACA |
| ex3_56<br>71376_<br>x1 | CM00067<br>2.2/47633<br>857-<br>47633927       | 14 | 0.004 | 28.2 | 1 | GTTAATGTAGCTTAATTATTTAAAGCAAGGCACTGAAAATGCCTAGATGGG<br>TCCGCACAACCCGGTAAACA                                        |
| ex3_56<br>72492_<br>x1 | CM00067<br>9.2/38861<br>755-<br>38861684       | 23 | ##### | 38.2 | 1 | GGGGGTATAGCTCAGGGGTAGAGCATTGACTGCAGATCAAGAAGTCCCC<br>GGTTCAAATCCGGGTGCCCCCT                                        |
| ex3_56<br>72608_<br>x1 | CM00066<br>8.2/27721<br>201-<br>27721119       | 13 | 0.01  | 26.3 | 1 | ACCGGGATGGCCGAGTGGTTAAGGCGTTGGACTTAAGATCCAATGGGCTG<br>GTGCCC GCGTGGGTTTGAACCCCACTCTCGGTA                           |
| ex3_56<br>72673_<br>x1 | CM00068<br>1.2/49534<br>748-<br>49534676       | 13 | 0.01  | 26.3 | 1 | ACCTGGGTAGCTTAGTTGGTAGAGCATTGGACTTTTAATTTGAGGGCCCAG<br>GTTTCAAGTCCCTGTTTGGGTG                                      |
| ex3_56<br>76503_<br>x1 | CM00066<br>3.2/16520<br>658-<br>16520585       | 14 | 0.004 | 28.2 | 1 | GTCTCTGTGGCGCAATCGGTTAGCGCGTTCCGGCTGTTAACTGAAAGGTTG<br>GTGGTTCGAGCCCACCCAGGGACG                                    |

|                        |                                                |    |        |      |   |                                                                                          |
|------------------------|------------------------------------------------|----|--------|------|---|------------------------------------------------------------------------------------------|
| ex3_56<br>76802_<br>x1 | KZ208915<br>.1/326654<br>0-<br>3266610         | 14 | 0.004  | 28.2 | 1 | GGGGGTAGAATTCGGGGTAGAACATTTGACTGCAGATCAAGAGGTCCCCG<br>CTTCGAATCTGGGTACCCCCT              |
| ex3_56<br>77528_<br>x1 | CM00067<br>1.2/84246<br>500-<br>84246559       | 13 | 0.008  | 26.3 | 1 | GGTTCATGGTGTAATGGTGAGCACTCTGGACTCAGAATCCAGAAGTAGT<br>GCTGGAACAA                          |
| ex3_56<br>78217_<br>x1 | CM00068<br>4.2/36172<br>857-<br>36172789       | 14 | 0.006  | 28.2 | 1 | GAGAAAGTCAGAGTGATTATGAAGCTCGTTTGAACCAGTTTTAGGAGGTT<br>TGATTCCTTCCTTTCTCG                 |
| ex3_56<br>80876_<br>x1 | CM00067<br>3.2/11356<br>2356-<br>11356227<br>3 | 13 | 0.01   | 26.3 | 1 | ACCAGGATGGCCAAGTAGTTAAAGGCACTGGACTTAAGAGCCAATGGACA<br>TATGTCTGTGTGGGTTTGAACCCCACTCCTGGTG |
| ex3_56<br>80944_<br>x1 | CM00067<br>1.2/50964<br>82-<br>5096410         | 15 | 0.0005 | 30.2 | 1 | TAGATTGAAGCCAGTTGATTAGGGTATTTAGCTGTAACTAAATTTTTGTGG<br>GTTTGAATTCCACCGATCTAG             |
| ex3_56<br>81479_<br>x1 | CM00066<br>3.2/14373<br>5993-<br>14373592<br>0 | 13 | 0.008  | 26.3 | 1 | GTCTCTGTGGCGCAATGGGTTAGCGCGTTTCGGCTGTAAACCGAAAGGTTG<br>GTGGTTCGAGCCCATCCAGGGACG          |
| ex3_56<br>81525_<br>x1 | CM00066<br>9.2/57187<br>832-<br>57187767       | 13 | 0.008  | 26.3 | 1 | GGTAAAAAGGCCGGGTAAGCATTAGACTGTAAATCTAAAGACAGAGGTCA<br>AGGCCTCTTTTAGCA                    |
| ex3_56<br>82907_<br>x1 | CM00066<br>6.2/11629<br>7743-<br>11629781<br>3 | 15 | 0.0009 | 30.2 | 1 | GTTAATGTAGCTTAATTATTCAAAGCAAGACACTGAAAATGTCTAGATGGAT<br>CCGCACAACCCTATAAACA              |
| ex3_56<br>82975_<br>x1 | CM00066<br>8.2/27293<br>892-<br>27293965       | 26 | #####  | 52   | 1 | GGCCGGTTAGCTCAGTTGGTTAGAGCGTGCTGCTACTAATGCCAGGGTCG<br>AGGTTTCGATCCCCGTACGGGCCT           |

|                        |                                                |    |        |      |   |                                                                               |
|------------------------|------------------------------------------------|----|--------|------|---|-------------------------------------------------------------------------------|
| ex3_56<br>84497_<br>x1 | CM00066<br>3.2/23794<br>1311-<br>23794137<br>9 | 13 | 0.008  | 26.3 | 1 | AAGGGCTTAGCTTAATTAAGTGGTTGATTTGCATTCAATTGATGCAGAATA<br>GAGTCTCGCAGTCCTTA      |
| ex3_56<br>85020_<br>x1 | CM00067<br>2.2/55597<br>818-<br>55597888       | 13 | 0.009  | 26.3 | 1 | GTTAATGTAGCTTAATTATTTAAAGCAAGGCACTGAAAATGCCTAGATGGG<br>TCGCAAAACCCCATAAACA    |
| ex3_56<br>88472_<br>x1 | CM00066<br>3.2/93516<br>349-<br>93516277       | 26 | #####  | 52   | 1 | GGGGGTATAGCTCAGGTGGTAGAGCATTGACTGCAGATCAAGAGGTCCC<br>CGGTTCAAATCCGGGTGCCCCCT  |
| ex3_56<br>89575_<br>x1 | CM00066<br>8.2/57793<br>617-<br>57793545       | 17 | 0.008  | 26.3 | 1 | GGGGATTAGCTCAAGCGGTAGAGCGCCTGCTTAGCATGCAAGAGGTAG<br>CAGGATCGATGCCTGCATTCTCCA  |
| ex3_56<br>89670_<br>x1 | CM00068<br>1.2/31995<br>809-<br>31995876       | 14 | 0.003  | 28.2 | 1 | GTTTCCATGGTGTAATGGTGAGCACTCTGGACTCTGAATCCAGAAATACAT<br>TCAAAGAATTAAGAACA      |
| ex3_56<br>90234_<br>x1 | CM00066<br>3.2/23794<br>3730-<br>23794365<br>6 | 20 | 0.0002 | 32.2 | 1 | GTTAAGATGGCAGAGCCCAGCAATTGCATAAACTTAAACTTTACAATCA<br>GAGGTTCAACTCCTCTTCTTAACA |
| ex3_56<br>91109_<br>x1 | CM00067<br>6.2/88979<br>098-<br>88979170       | 19 | #####  | 38.2 | 1 | GGGGAATTAGCTCAAGTGGTAGAGCGCTCGCTTAGCATGCGAGAGGTAGT<br>GGGATCGATGCCCGCATTCTCCA |
| ex3_56<br>95351_<br>x1 | CM00066<br>4.2/11702<br>4867-<br>11702493<br>5 | 14 | 0.005  | 28.2 | 1 | AGAAATATGTCTGACAAAAGAATTACTTTGATAGAGTAAATAATAGAGATTA<br>AATTCCTCTTATTTCTA     |
| ex3_56<br>96504_<br>x1 | CM00066<br>4.2/14021<br>7492-<br>14021756<br>0 | 15 | 0.0005 | 30.2 | 1 | GAGGGCTTAGCTTAATTAAGTGGCTGATTTGTGTTCAATTGATGCAGAAT<br>AGAGTCTTGACAGTCCTTA     |

|                        |                                                |    |        |      |   |                                                                                                      |
|------------------------|------------------------------------------------|----|--------|------|---|------------------------------------------------------------------------------------------------------|
| ex3_57<br>04314_<br>x1 | CM00067<br>0.2/70237<br>343-<br>70237274       | 15 | 0.0007 | 30.2 | 1 | GGCAGTGTCTAGAGGTAAGAGTACAGGCTTAGAGTCAGACAGCGCGG<br>GTTCAAATCCTGCTTCTGCCA                             |
| ex3_57<br>07409_<br>x1 | CM00067<br>6.2/20663<br>285-<br>20663192       | 17 | 0.008  | 26.3 | 1 | CCTTCGATAGCTCAGCTGGTAGAGCGGAGGACTGTAGATTGTACAGACAT<br>TTGCGGACATCCTTAGGTTCGCTGGTTTCGATTCCGGCTCGAAGGA |
| ex3_57<br>07821_<br>x1 | CM00068<br>4.2/44150<br>657-<br>44150743       | 24 | #####  | 48.1 | 1 | GCTCGGATGATCCTCAGTGGTCTGGGGTGCAGGCTTCAAACCTGTAGCTG<br>TCTAGTGACAGAGTGGTTCAATTCCACCTTTGTAGGC          |
| ex3_57<br>08207_<br>x1 | CM00066<br>8.2/27583<br>528-<br>27583457       | 16 | 0.0002 | 32.2 | 1 | TCCTCGTTAGTATAGTGGTGAGTGTCCCCGTCTGTCACGCGGGAGACCGG<br>GGTTCGATTCCCCGACGGGGAG                         |
| ex3_57<br>11485_<br>x1 | CM00067<br>4.2/49817<br>479-<br>49817409       | 14 | 0.003  | 28.2 | 1 | TAGGATGTGGTGTGATAGGTAGCATGGAGAATTTTGGATTCTCAGGGGTA<br>GGTTCAATTCCTATATTCTAG                          |
| ex3_57<br>14527_<br>x1 | CM00066<br>9.2/14180<br>3557-<br>14180362<br>8 | 14 | 0.002  | 28.2 | 1 | TAGGACGTGGTGTAGTAGGTAGCATGGAGAATGTTGAATTCTCAGGGGTA<br>GGTTCAATTCCTATAGTTCTAG                         |
| ex3_57<br>17520_<br>x1 | CM00066<br>4.2/11702<br>6500-<br>11702643<br>5 | 14 | 0.003  | 28.2 | 1 | GGTAAATGACTGAGTAAGCGTTAGACTGTAAATCAAAGATGGAGGTCAA<br>GGCCTCCTTTACCA                                  |
| ex3_57<br>19633_<br>x1 | CM00067<br>1.2/80564<br>882-<br>80564950       | 13 | 0.008  | 26.3 | 1 | AAGGGCTTAGCTTAATTAAGTGGTTGATTTGTGTTCAATTGATGCAGAAC<br>AGAGTCTTGCAGTCCTTA                             |
| ex3_57<br>20245_<br>x1 | CM00067<br>0.2/66113<br>367-<br>66113459       | 24 | #####  | 48.1 | 1 | CCTTCGATAGCTCAGCTGGTAGAGCGGAGGACTGTAGCTACTTCCTCAGC<br>AGGAGACATCCTTAGGTTCGCTGGTTTCGATTCCGGCTCGAAGGA  |
| ex3_57<br>20851_<br>x1 | CM00066<br>8.2/26568                           | 13 | 0.009  | 26.3 | 1 | CCTTCGATAGCTCAGTTGGTAGAGCGGAGGACTGTAGTTGGCTGTGTCCT<br>TAGACATCCTTAGGTTCGCTGGTTTCGAATCCGGCTCGAAGGA    |

|                        |                                                |    |        |      |   |                                                                                 |  |
|------------------------|------------------------------------------------|----|--------|------|---|---------------------------------------------------------------------------------|--|
| x1                     | 858-<br>26568948                               |    |        |      |   |                                                                                 |  |
| ex3_57<br>21047_<br>x1 | CM00066<br>3.2/14380<br>0111-<br>14380004<br>1 | 16 | 0.0001 | 32.2 | 1 | GCACTGGTGGTTCAGTGGTAGGGTTCTCGCCTCACACGCGGGAGACCCG<br>GGTTCAATTCCCGGTCAAGGCA     |  |
| ex3_57<br>21922_<br>x1 | CM00066<br>3.2/24887<br>4248-<br>24887431<br>9 | 20 | #####  | 40.1 | 1 | TCCCTGGTGGTCTAGTGGTTAGGATTCGGCGCTCTCACCGCCGCGGCC<br>GGTTTCGATTCCCGGTCAGGAAA     |  |
| ex3_57<br>27083_<br>x1 | CM00066<br>4.2/11702<br>3841-<br>11702391<br>5 | 13 | 0.009  | 26.3 | 1 | GTAAAGATGGCAGAGCCCAGCAATTGCATAAATCTTAAACTTTATAATCA<br>GAGTTTCGACTCCTCTTCTTAACA  |  |
| ex3_57<br>27638_<br>x1 | KI270803.<br>1/667733-<br>667803               | 14 | 0.002  | 28.2 | 1 | GTAAATGTAGCTTAATTATTTAAAGCAAGACACTGAAAATGTCTAGATGGGC<br>TTATACAGCCCCATAAACA     |  |
| ex3_57<br>28171_<br>x1 | CM00068<br>5.2/39153<br>03-<br>3915230         | 26 | #####  | 44.1 | 1 | GGCCGGTTAGCTCAGTTGGTAAGAGCGTGGTGCTGATAACACCAAGGTGCG<br>CGGGCTCGACTCCCGCACCGGCCA |  |
| ex3_57<br>28385_<br>x1 | CM00066<br>6.2/40906<br>798-<br>40906726       | 13 | 0.008  | 26.3 | 1 | GACCATGTGGCCTAAGGGAAAAGACATCTCACTTTGGGTCAGAAGATTGA<br>GGTTCAAGTCCTTTCATGGTCA    |  |
| ex3_57<br>31720_<br>x1 | CM00066<br>6.2/15546<br>1250-<br>15546131<br>5 | 22 | #####  | 44.1 | 1 | GGTAAAGTGGCTGAATAAGCATTAGACTGTAAATCTAAAGACAGAGGTCAA<br>GCCTCTTTTTAGCA           |  |
| ex3_57<br>34442_<br>x1 | CM00066<br>3.2/14837<br>8989-<br>14837891<br>6 | 14 | 0.004  | 28.2 | 1 | GTCTCTGTGGCACAATCGGTTAGCGCGTTCGGCTGTTAATCTAGAGGTTG<br>GTGGTTAGAGCCCACTGAGGGATG  |  |

|                        |                                                |    |       |      |   |                                                                                               |
|------------------------|------------------------------------------------|----|-------|------|---|-----------------------------------------------------------------------------------------------|
| ex3_57<br>35455_<br>x1 | CM00067<br>8.2/33698<br>13-<br>3369884         | 13 | 0.009 | 26.3 | 1 | TAGGACTTGGTGTAATGGGTAGCACAGAGAATTTTGGATTCTCAGGGGTG<br>GGTTCAATTCCTTTCGTCCTAG                  |
| ex3_57<br>39076_<br>x1 | CM00066<br>8.2/57870<br>417-<br>57870345       | 14 | 0.005 | 28.2 | 1 | GGGGAATTAGCCCAAGTGGTAGAGCGCTTGCTTAGCATGCAAGAGGTAGT<br>GGGATCGATGCCACATTCTCCA                  |
| ex3_57<br>40339_<br>x1 | CM00066<br>8.2/69204<br>486-<br>69204568       | 13 | 0.01  | 26.3 | 1 | ACTCATTGGCTGAGTGGTTAAGGCATTGGACTTAAGATCCAATGGAGTAG<br>TGGCTGTGTGGGTTAAACCCACTACTGGTA          |
| ex3_57<br>45328_<br>x1 | CM00067<br>2.2/19747<br>745-<br>19747689       | 13 | 0.01  | 26.3 | 1 | TGGTGTAATAGGTAGCACAGAGAATTCTGGATTCTCAGGGGTAGGTTCAAT<br>TCCTAT                                 |
| ex3_57<br>46011_<br>x1 | CM00066<br>6.2/15546<br>3900-<br>15546382<br>6 | 13 | 0.01  | 26.3 | 1 | GTAAAGATGGCAGAGCCTGGTAATTGCATAAACTTAAAATTTTATAATCAG<br>AGGTTCAACTCCTCTTCTTAACA                |
| ex3_57<br>48544_<br>x1 | CM00067<br>0.2/66113<br>988-<br>66114076       | 13 | 0.008 | 26.3 | 1 | CCTTCGATAGCTCAGCTGGTAGAGCGGAGGACTGTAGGCGCGCGCCCGT<br>GGCCATCCTTAGGTCGCTGGTTCGATTCCGGCTCGAAGGA |
| ex3_57<br>50555_<br>x1 | CM00068<br>5.2/55178<br>915-<br>55178987       | 14 | 0.003 | 28.2 | 1 | TAGATTGAAGCCAGTTGATTAGGGTGTTTAGCTGTTAACGAAATTTTCGTG<br>GTTTTGAATTCCACCAATCTAG                 |
| ex3_57<br>53884_<br>x1 | CM00067<br>8.2/31939<br>18-<br>3193990         | 18 | 0.004 | 28.2 | 1 | GCCCCAGTGGCCTGATGGATAAGGTAAGTGGCCTCCTAAGCCAGGGATTGT<br>GGGTTGAGTTCCACCTGGGGTA                 |
| ex3_57<br>56847_<br>x1 | CM00066<br>3.2/16162<br>1675-<br>16162174<br>8 | 24 | ##### | 48.1 | 1 | GTTTCTGTAGCGCGATCGGTTAGCGCCTTCGGCTGTTAAACGAAAGGTTG<br>GTGGTTCGTTCCACCCCGGGACA                 |
| ex3_57<br>57187_<br>x1 | CM00066<br>7.2/26198                           | 13 | 0.008 | 26.3 | 1 | GCCCGACTACCTCAGTCGGTGGAGCATGGGACTCTTCATCCCAGGGTTGT<br>GGTTCGAGCCCCACATTGGGCA                  |

|                        |                                                |    |        |      |   |                                                                                        |  |
|------------------------|------------------------------------------------|----|--------|------|---|----------------------------------------------------------------------------------------|--|
| x1                     | 502-<br>26198430                               |    |        |      |   |                                                                                        |  |
| ex3_57<br>57366_<br>x1 | CM00067<br>9.2/64530<br>873-<br>64530800       | 25 | #####  | 50.1 | 1 | AGCACCATGGCTTAGCTGGTTAAAGCACCTGTCTAGTAAACAGGAGATCCT<br>GAGTTTCAATTCCAATGGTGCCT         |  |
| ex3_57<br>59246_<br>x1 | CM00066<br>8.2/28989<br>002-<br>28989083       | 17 | 0.008  | 26.3 | 1 | GGTAGCGTGGCCGAGCGGTCTAAGGCGCTGGATTAAGGCTCCAGTCTCTT<br>CGGGGGCGTGGGTTCAAATCCCACCGCTGCCA |  |
| ex3_57<br>59452_<br>x1 | CM00066<br>3.2/55373<br>438-<br>55373506       | 20 | 0.0003 | 32.2 | 1 | GAGAAAGTCATCGTAGTTACGAAGTTGGCTTAAACCCAGTTTTGGGAGGTT<br>CAATTCCTTCTTTCTCT               |  |
| ex3_57<br>60063_<br>x1 | GL00025<br>5.2/88972<br>-88899                 | 14 | 0.002  | 28.2 | 1 | GCCGAAATAGCTCAGTTGGGAGAGCGTTAGACCGAAGATCTTAAAGGTCC<br>CTGGTTCAATCCCGGTTTTCGGCA         |  |
| ex3_57<br>62777_<br>x1 | CM00066<br>3.2/16161<br>2718-<br>16161278<br>9 | 13 | 0.01   | 26.3 | 1 | GCGTTGGTGGTGTAGTGGTGAGCACAGCTGCCTTTCAAGCAGTTAACGCG<br>GGTTCGATTCCCGGGTAACGAA           |  |
| ex3_57<br>63390_<br>x1 | CM00067<br>9.2/22527<br>153-<br>22527081       | 16 | 0.0001 | 32.2 | 1 | TAGATTGAAGCCAGTTGATTAAGGTATTTAGCTGTAAACCAAATTTTTGTGG<br>GTTAAGTCCCATTGATCTAG           |  |
| ex3_57<br>64687_<br>x1 | CM00066<br>3.2/16872<br>583-<br>16872654       | 15 | 0.0008 | 30.2 | 1 | TCCCTGGTGGTCTAGTGGCTAGGATTCGGCGCTTTCACCGCCGCGGCC<br>GGTTCGATTCCCGGCCAGGGAA             |  |
| ex3_57<br>66530_<br>x1 | CM00067<br>1.2/92539<br>385-<br>92539457       | 18 | 0.006  | 28.2 | 1 | TAGATTGAAGCCAGTTGATTAGGGTATTTAGCTGTAACTACATTTTTATGG<br>GTTTGAGTCCCATTATCTAG            |  |
| ex3_57<br>69284_<br>x1 | CM00067<br>2.2/12581<br>9937-<br>12581987<br>4 | 13 | 0.01   | 26.3 | 1 | GGTAAATGGCAGAGCAAGCATTAGACTGTAAATCTAGAGACAGGTTGAG<br>CCCTCTTTTTACCA                    |  |

|                        |                                                |    |        |      |   |                                                                                       |
|------------------------|------------------------------------------------|----|--------|------|---|---------------------------------------------------------------------------------------|
| ex3_57<br>72834_<br>x1 | CM00067<br>0.2/11093<br>4801-<br>11093486<br>9 | 23 | #####  | 46.1 | 1 | GAGGGCTTAGCTTAATTAAGTAGTTGATTTGCGTTCAATTGATGCAGAGT<br>GGAGTCTTGCAGTCCTTA              |
| ex3_57<br>77346_<br>x1 | CM00067<br>6.2/20677<br>100-<br>20677019       | 13 | 0.01   | 26.3 | 1 | GGTAGTGTGGTTGAATGGTCTAAGGCACTGAATTTAGGCTCCAGTCTCTTT<br>GGGGACGTGGGTTTAAATCCCCTGCTGCAA |
| ex3_57<br>79437_<br>x1 | CM00066<br>4.2/13138<br>5560-<br>13138563<br>1 | 13 | 0.009  | 26.3 | 1 | TAGGACGTGGTGTGATAGGTAGCACGGAGAATTTTGGATTCTCAGGGATG<br>GGTTCAATTCCTGTAGTTCTAG          |
| ex3_57<br>80488_<br>x1 | CM00066<br>9.2/14935<br>6723-<br>14935666<br>5 | 22 | 0.003  | 28.2 | 1 | ATAGCTCAGTGGTAGAGCATTAACTGTAGATCAAGAGGTCCCTGGATCAA<br>CTCTGGGT                        |
| ex3_57<br>87509_<br>x1 | CM00066<br>9.2/97141<br>638-<br>97141584       | 14 | 0.004  | 28.2 | 1 | GCTAGTCAGTAGAGCATGAGACTCTTAATCTCAGGGTCGTGGGTTGAGC<br>CCCAC                            |
| ex3_57<br>94886_<br>x1 | CM00067<br>6.2/83589<br>111-<br>83589041       | 13 | 0.01   | 26.3 | 1 | GTTAATGTAGCTTAATTATTCAAAGCAAGACACTGAAAATGTCTAGATGGGT<br>TTACACAATTCCATAAACG           |
| ex3_57<br>96267_<br>x1 | GL00025<br>6.2/52365<br>-52293                 | 13 | 0.008  | 26.3 | 1 | GGCCGCGTGGCCTAATGGATAAGGCGTCTGATTCCGGATCAGAAGATTGA<br>GGGTTAGAGTCCCTTCGTGGTCCG        |
| ex3_57<br>99641_<br>x1 | CM00066<br>3.2/16535<br>350-<br>16535279       | 23 | #####  | 46.1 | 1 | TCCCTGGTGGTCTAGTGGCTAGGATTCGGCGCTTTCACCGCCGCGGCC<br>GGGTTGATTCCCGGTCAGGGAA            |
| ex3_57<br>99788_<br>x1 | CM00066<br>5.2/10690<br>2102-<br>10690203<br>1 | 16 | 0.0003 | 32.2 | 1 | TAGGATGTGGTGTATTAGGTAGCACAGAGAATTTTGGATTCTCAGGGGTAG<br>GTTCGATTCCATAATTCTAC           |

|                        |                                                |    |        |      |   |                                                                                        |
|------------------------|------------------------------------------------|----|--------|------|---|----------------------------------------------------------------------------------------|
| ex3_58<br>00888_<br>x1 | CM00066<br>8.2/28478<br>704-<br>28478623       | 15 | 0.0005 | 30.2 | 1 | GGTAGCGTGGCCGAGTGGTCTAAGACGCTGGATTAAGGCTCCAGTCTCTT<br>CGGGGGCGTGGGTTTGAATCCCACCGCTGCCA |
| ex3_58<br>01937_<br>x1 | CM00066<br>6.2/15546<br>2873-<br>15546280<br>5 | 13 | 0.008  | 26.3 | 1 | GGAAATATGTCAGACAAAAGAATTACTTTGATAGAGTAAACAATAGAGGTT<br>AAAATCCTCTAATTTCTA              |
| ex3_58<br>02290_<br>x1 | CM00066<br>5.2/17699<br>968-<br>17699905       | 15 | 0.0008 | 30.2 | 1 | GTATATCTCAGGGGGCAGAGCATTGACTGCAGATCAAGAGGTCCCCGGT<br>TGAAATCCGGGTGC                    |
| ex3_58<br>10632_<br>x1 | CM00066<br>3.2/14515<br>7157-<br>14515722<br>9 | 16 | 0.0001 | 32.2 | 1 | GTTTCCGTAGTGTAGTGGTTATCATGTTTCGCCTCACACGCGAAAGGTCCC<br>CGGTTTCGAAACTGGATGGAAACA        |
| ex3_58<br>11844_<br>x1 | CM00066<br>3.2/23794<br>2562-<br>23794263<br>3 | 13 | 0.009  | 26.3 | 1 | TAGGACTTGGTGTAATAGGTAGCACGAAGAGATTTGGATTCTCAGGGGTA<br>GGTTCAATTCCTATAGTTCTGG           |
| ex3_58<br>13753_<br>x1 | CM00068<br>3.2/88455<br>58-<br>8845492         | 14 | 0.004  | 28.2 | 1 | GGTAAAATGACTGAGTAGGGCATTAGACTGTACATCTAAAAACAGAGGTCA<br>ACGCCTGTTTTTACCA                |
| ex3_58<br>14596_<br>x1 | CM00066<br>8.2/28489<br>066-<br>28488993       | 13 | 0.009  | 26.3 | 1 | GGCTCTATGGCTTAGTTGGTTAAAGCGCCTGTCTCGTAAACAGGAGATCCT<br>GGGTTTCGACTCCCAGTGGGGCCT        |
| ex3_58<br>17009_<br>x1 | AC00867<br>0.6/83725<br>-83795                 | 13 | 0.009  | 26.3 | 1 | ACUUUUAAAAGGAUAACAGCCAUCCGUUGGUCUUAGGCCCCAAAAUUUU<br>GGUGCAACUCCAAAUAAAAGUA            |
| ex3_58<br>22328_<br>x1 | GL00025<br>3.2/73472<br>-73400                 | 13 | 0.01   | 26.3 | 1 | GCCGAGATAGCTCAGTTGGGAGAGCGTTAGACTGAAGATCTAAAGATCCC<br>TGTTCAATCCCGGGTTTCGGCA           |
| ex3_58<br>25943_<br>x1 | CM00067<br>8.2/31961<br>53-                    | 13 | 0.009  | 26.3 | 1 | GCCCAGCTAGCTCAGCCGGTAGAGCACAAAGACTCTTAATCTCAGGGTCGT<br>GGTTTTGAGCCCTGTGTTGAGCA         |

3196225

|                        |                                                |    |        |      |   |                                                                                |
|------------------------|------------------------------------------------|----|--------|------|---|--------------------------------------------------------------------------------|
| ex3_58<br>27416_<br>x1 | CM00066<br>3.2/14804<br>8589-<br>14804851<br>6 | 20 | 0.0004 | 32.2 | 1 | GTCTCTGTGGCGCAATCGGTTAGCGCGTTCGGCTGTAACTGAAAGGTTA<br>GTGGTTCGAGCCCACCCGGGGACG  |
| ex3_58<br>33284_<br>x1 | CM00067<br>9.2/40082<br>752-<br>40082680       | 13 | 0.009  | 26.3 | 1 | GATTCTATAGTGTAGCAGTTATCACATCTGCTTTACATGCAGAAGGTCCTA<br>GGTTTGAGCCGCGGTGGAACCA  |
| ex3_58<br>36127_<br>x1 | CM00066<br>8.2/57842<br>286-<br>57842214       | 13 | 0.01   | 26.3 | 1 | GCCCTCTTAGTGCAGCTGGCAGCGCGTCAGTTTCATAATCTGAAAGTCCT<br>GAGTTCAAGCCTCAGAGAGGGCA  |
| ex3_58<br>37463_<br>x1 | CM00067<br>9.2/19598<br>561-<br>19598631       | 14 | 0.002  | 28.2 | 1 | GTTAATGTAGCTTAATTATTCAAAGCAAGACACTGAAAATGTCTAGATGGGT<br>CTGCACATCCCCATAAACA    |
| ex3_58<br>37558_<br>x1 | CM00066<br>3.2/14835<br>3561-<br>14835363<br>2 | 15 | 0.001  | 30.2 | 1 | GGTTCATGGGTAAATGGTGAGCACCCCTGGACTCTGAATCAAGCGATCCG<br>AGTTCAAATCTCGGTGGTACCT   |
| ex3_58<br>40339_<br>x1 | CM00066<br>3.2/16532<br>471-<br>16532398       | 27 | #####  | 54   | 1 | GTCTCTGTGGTGCAATCGGTTAGCGCGTTCGGCTGTAAACCATAAGGTTG<br>GTGGTTACAGACCACCCAGGGACG |
| ex3_58<br>43731_<br>x1 | CM00067<br>0.2/11093<br>4549-<br>11093461<br>4 | 17 | #####  | 34.2 | 1 | GGTAAAATGGCTGAGTAAACATTAGACTGCAAATCTGAAGATGGAGGTTAA<br>GCCTCTTTTTACCA          |
| ex3_58<br>52111_<br>x1 | CM00066<br>4.2/14022<br>1556-<br>14022148<br>5 | 13 | 0.009  | 26.3 | 1 | GCTAAGATGGCAGAGCCCGGCAATTGCATAAACTTAAACTTTATAATCT<br>GAGGTTCAACTCCTCTTAACA     |

|                        |                                                |    |       |      |   |                                                                                        |
|------------------------|------------------------------------------------|----|-------|------|---|----------------------------------------------------------------------------------------|
| ex3_58<br>52426_<br>x1 | CM00067<br>1.2/54433<br>01-<br>5443364         | 17 | ##### | 34.2 | 1 | TGCACAATAGTTAAGAGCATAAACACTGGAACCAGATGTCTGGGTTCGAAT<br>CCCAGCTGTGCTA                   |
| ex3_58<br>55051_<br>x1 | CM00066<br>4.2/13027<br>2409-<br>13027233<br>8 | 17 | 0.01  | 26.3 | 1 | TAGGACGTGGTGTGATAGGTAGCATGGAGAATTTTGGATTCTCAGGGATG<br>GGTTC AATTCCTATAGTCCTAG          |
| ex3_58<br>61314_<br>x1 | CM00067<br>5.2/36065<br>681-<br>36065610       | 13 | 0.008 | 26.3 | 1 | TAGGATGTGGTGTGACAGGTAGCATGGAGAATTTTGGATTCTCAGGGTTA<br>GGTTC AATTCCTATAGTTCTAG          |
| ex3_58<br>64767_<br>x1 | CM00066<br>9.2/14180<br>2320-<br>14180238<br>8 | 15 | 0.001 | 30.2 | 1 | AAGGGTTTAGCTTAGTTAAAGTGGTTGATTTGCATTCAACTGATGCAGAAT<br>AGAGTCTGGCAGTCCTTA              |
| ex3_58<br>68643_<br>x1 | CM00066<br>3.2/54957<br>941-<br>54957869       | 30 | ##### | 60   | 1 | GCCCAGCTAGCTCAGTCGGTAGAGCATGAGACTCTTAATCTCAGGGTCAT<br>GGGTTTGAGCCCCACGTTTGGTG          |
| ex3_58<br>68660_<br>x1 | CM00066<br>9.2/14966<br>4824-<br>14966489<br>5 | 13 | 0.008 | 26.3 | 1 | GGGGGTATAGCTCACAGGTAGAGCATTTGACTGCAGATCAAGAGGTCCCC<br>GGTTC A AATCTGGGTGCCCCCT         |
| ex3_58<br>77017_<br>x1 | GL00025<br>1.2/28053<br>0-280459               | 26 | ##### | 52   | 1 | GGGGGTGTAGCTCAGTGGTAGAGCGCATGCTTTGCATGTATGAGGTCCCG<br>GGTTCGATCCCCGCCACCTCCA           |
| ex3_58<br>78576_<br>x1 | CM00066<br>4.2/13027<br>5520-<br>13027545<br>1 | 14 | 0.002 | 28.2 | 1 | GAGAAGGTCACAGAGGTTATGGGATTGGCTTGAAACCAGTCTGTGGGGG<br>GTTCGATTCCCTCCTTTTTCA             |
| ex3_58<br>79275_<br>x1 | CM00067<br>1.2/12035<br>5157-<br>12035507<br>5 | 14 | 0.004 | 28.2 | 1 | GTCAGGGTGGCTGAGCAGTCTGAGGGGCTGCGTTCAGGTCGCAGTCTGC<br>CCTGGAGGCGTGGGTTTCAATCCCCTCCTGAAA |

|                        |                                                |    |        |      |   |                                                                                |
|------------------------|------------------------------------------------|----|--------|------|---|--------------------------------------------------------------------------------|
| ex3_58<br>81865_<br>x1 | CM00066<br>9.2/14935<br>5746-<br>14935567<br>5 | 16 | 0.0001 | 32.2 | 1 | GGGGGTATAGCTCAGGGGTAGAGCATTGACTGCAGATCAAGAGGTCCCC<br>AGTTCAAATCTGGGTGCCCCCT    |
| ex3_58<br>81928_<br>x1 | CM00066<br>8.2/27162<br>271-<br>27162344       | 13 | 0.008  | 26.3 | 1 | GGCCCTGTGGCTTAGCTGGTCAAAGCGCCTGTCTAGTAAACAGGAGATCC<br>TGGTTTCGAATCCCAGCGGGGCCT |
| ex3_58<br>86017_<br>x1 | CM00068<br>5.2/55178<br>753-<br>55178818       | 14 | 0.007  | 28.2 | 1 | GGTAAATGGCTGGGTAAGCATTAGACTGTAAATCTAAAGACAGAGGCCA<br>AGGCCGCTTTTATAGCA         |
| ex3_58<br>88434_<br>x1 | CM00066<br>3.2/14383<br>1781-<br>14383170<br>8 | 15 | 0.0009 | 30.2 | 1 | GTCTCTGTGGCGCAATCGGCTAGCGGTTTGGCTGTAACTAAAAAGTTG<br>GTGGTTCGAACACACCCAGAGGCG   |
| ex3_58<br>91501_<br>x1 | CM00066<br>3.2/23794<br>1237-<br>23794130<br>9 | 13 | 0.008  | 26.3 | 1 | TAGATTGAAGCCAGTTGATTAGGGTATTTAGCTGTAACTAAGTTTTCATGG<br>GTTTGAATCCCACCGATCTAG   |
| ex3_58<br>92700_<br>x1 | CM00067<br>3.2/10340<br>4238-<br>10340430<br>7 | 13 | 0.008  | 26.3 | 1 | CAAGAAATTCATAGAGGTTATGGGATTGGCTAGAAACCAGTTTCAGGAGGT<br>TCGATTCCTTCCTTTTTGG     |
| ex3_59<br>06282_<br>x1 | CM00066<br>6.2/15546<br>2736-<br>15546280<br>7 | 13 | 0.008  | 26.3 | 1 | TAGGACGTGGTGTGATAGGTAGCACAGAGAATTTTGGATTCTCAGGGGTA<br>GTTAAATTCCTATAGTACTAG    |
| ex3_59<br>09145_<br>x1 | CM00066<br>8.2/26673<br>362-<br>26673434       | 19 | 0.001  | 30.2 | 1 | GGGGAATTAGCTCAAGTGGTAGAGCGCTTGCTTAGCATGCAAGAGGTAGT<br>GGGATCAATGCCACATTCTCCA   |
| ex3_59<br>09173_<br>x1 | CM00067<br>9.2/22527<br>306-                   | 14 | 0.004  | 28.2 | 1 | GGTAAGATGGCTGAGCAAAGCATTAGACTGTAAATCTAAAACTCTTTTT<br>ACCA                      |

|                        |                                                            |    |        |      |   |                                                                                    |
|------------------------|------------------------------------------------------------|----|--------|------|---|------------------------------------------------------------------------------------|
| ex3_59<br>10134_<br>x1 | 22527251<br>CM00068<br>5.2/10277<br>3201-<br>10277327<br>5 | 13 | 0.008  | 26.3 | 1 | GTAAAGATGGTAGAGCCTGGTAATTGCATAAACTTGAAATTTTATAATCAG<br>AGGTTCAATTACTCTTCTTTTAA     |
| ex3_59<br>15573_<br>x1 | CM00066<br>9.2/14940<br>6135-<br>14940606<br>4             | 13 | 0.008  | 26.3 | 1 | GGGGGTATAGCTGAGGAGTAAACCATTTGGCTGCAGATCAAGTGGTCCCT<br>GTTCAAATATGGGTGCCCTCT        |
| ex3_59<br>17200_<br>x1 | CM00067<br>1.2/92539<br>198-<br>92539263                   | 13 | 0.009  | 26.3 | 1 | GGTAAAATGGCTGAGTAAAGCATTAGACTGTAAATCTAAGGACAGAGGCTA<br>AACCTCTTTTACCA              |
| ex3_59<br>22691_<br>x1 | CM00066<br>4.2/13138<br>5697-<br>13138562<br>9             | 15 | 0.0006 | 30.2 | 1 | AGAAATATGTCTGACAAAAGAATTACTTTGACAGAGTAAACAACAGAGGTT<br>AAAATCCTCATATTTCTA          |
| ex3_59<br>22886_<br>x1 | CM00066<br>8.2/26305<br>570-<br>26305493                   | 14 | 0.003  | 28.2 | 1 | GAGGCCTGGCCGAGTGGTTAAGGCGATGGACTGCTAATCCATTGTGCTCT<br>GCACGCGTGGGTTTCAATCCCATCCTCG |
| ex3_59<br>24225_<br>x1 | CM00066<br>8.2/26721<br>065-<br>26720992                   | 18 | 0.003  | 28.2 | 1 | GGCCGGTTAGCTCAGTTGGTCAGAGCGTGGTGCTAATAACGCCAAGGTCG<br>CGGGTTCGATCCCCGTACGGGCCA     |
| ex3_59<br>28764_<br>x1 | CM00067<br>1.2/74903<br>145-<br>74903074                   | 15 | 0.001  | 30.2 | 1 | TCCTCGTTAGTATGGTGGTGGTATCCCTGCCTGTCACGCGGGAGACCGG<br>GGTTCGATTCCCAACGGGGAG         |
| ex3_59<br>30597_<br>x1 | CM00067<br>2.2/69595<br>484-<br>69595416                   | 14 | 0.004  | 28.2 | 1 | AGAAATATGTCCGATAAAAGAGTTACATTGATAGAATAAATAATAGAGGTTT<br>AAATCCTCTTATTTCTA          |
| ex3_59<br>31472_<br>x1 | CM00066<br>3.2/14512<br>9239-<br>14512931                  | 25 | #####  | 50.1 | 1 | GTCTCTGTGGCGCAATCGGCTAGCGCGTTTGGCTGTTAACTAAAAGGTTG<br>GCGGTTTCAACCCACCCAGAGGCG     |

2

|                        |                                                |    |       |      |   |                                                                               |
|------------------------|------------------------------------------------|----|-------|------|---|-------------------------------------------------------------------------------|
| ex3_59<br>37476_<br>x1 | CM00066<br>3.2/12104<br>8505-<br>12104843<br>2 | 14 | 0.002 | 28.2 | 1 | GTCTCTGTGGCGCAATCGGCTAGCGCTTTTGGCTGTAACTAAAAGGTTG<br>GTGGTTTGAACCCACCCAGAGGCG |
| ex3_59<br>41921_<br>x1 | CM00067<br>0.2/46827<br>965-<br>46828036       | 14 | 0.004 | 28.2 | 1 | TACGACATGGTGTAATAAGTAGCACAGAGAATTTTGGGTTCTCAGGGGTAG<br>GTTCAATTCCCATAGTTCTAG  |
| ex3_59<br>42220_<br>x1 | CM00067<br>8.2/10721<br>693-<br>10721625       | 13 | 0.009 | 26.3 | 1 | GTAATATAGTTTAAACCAAACATTAGACTATGAATCTAACAATAGAAGCCC<br>GCAACTTCTTATCTACC      |
| ex3_59<br>42967_<br>x1 | GL00025<br>4.2/29263<br>-29190                 | 14 | 0.004 | 28.2 | 1 | GCTGAAATAGCTCAGTTGGGAGAGCGTTAGACTGAAGATCTTAAAGTTCCC<br>TGTTCAACCCTGGGTTTCAGCC |
| ex3_59<br>55317_<br>x1 | CM00067<br>2.2/36434<br>555-<br>36434485       | 14 | 0.002 | 28.2 | 1 | ACTTTTAAAGTATAAGAGCGACCCATTGGTCTTAGGAACCAAAAATATTGG<br>TGCAACTCCAAATAAAAGTA   |
| ex3_59<br>60246_<br>x1 | CM00066<br>3.2/16559<br>6913-<br>16559698<br>5 | 14 | 0.003 | 28.2 | 1 | GTCTAGCTAGATCAGTTGGTAGAGCATAAGACTCTTAATCTCAGGGTCATG<br>GGTTTGAGCCCTACGTTGGGCG |
| ex3_59<br>68528_<br>x1 | CM00067<br>3.2/54759<br>373-<br>54759316       | 14 | 0.003 | 28.2 | 1 | TAGCTTAGTTGATGAAGCGTGAGACTCTTAATCTCAGGGTAGTGGGTTCAA<br>GCCCCAC                |
| ex3_59<br>74922_<br>x1 | CM00067<br>0.2/46828<br>102-<br>46828034       | 13 | 0.009 | 26.3 | 1 | GGAAATATGTTCAACAAAAGAATTACTTTGATAGACTAAACAATGGAGGTTA<br>AAATCCTCTTATTTCTA     |
| ex3_59<br>82080_<br>x1 | CM00066<br>7.2/13218<br>0779-<br>13218083<br>8 | 19 | 0.002 | 30.2 | 1 | AGGGGTATAGCTCAGTGGTAGAGCATTTGACTGCAGATCAAAAAAAAAAAG<br>TTTCCCCCG              |

|                        |                                                |    |        |      |   |                                                                                                    |
|------------------------|------------------------------------------------|----|--------|------|---|----------------------------------------------------------------------------------------------------|
| ex3_59<br>83262_<br>x1 | CM00066<br>8.2/15654<br>7986-<br>15654791<br>2 | 13 | 0.01   | 26.3 | 1 | GTTAAGACGGCAGAGCCCGGCAATTGCGTAAAATTTACAACCTTTATGGGCA<br>GAGGTTCAATTCCTCTCTTAACA                    |
| ex3_59<br>95369_<br>x1 | CM00066<br>8.2/27631<br>421-<br>27631514       | 14 | 0.004  | 28.2 | 1 | GCTCCAGTGGCGCAATCGGTTAGCGCGCGGTACTTATACAACAGTATATG<br>TCCGGGTGATGCCGAGGTTGTGAGTTCGAGCCTCACCTGGAGCA |
| ex3_59<br>97393_<br>x1 | CM00066<br>9.2/14960<br>8376-<br>14960844<br>7 | 14 | 0.002  | 28.2 | 1 | GGGTGTATGGCTCAGGGGTAGAGAATTTGACTAGAGATCAAGAGGTCCCT<br>GGTCAAATCCAGGTGCCCCCT                        |
| ex3_60<br>02730_<br>x1 | CM00068<br>5.2/55181<br>396-<br>55181322       | 14 | 0.004  | 28.2 | 1 | GTTAAGATGGCAGAGCCCGGCAATTGCATAAGACTTAAAACCTTTATAATCA<br>GAGGTTCAACTCCTCTCATTAACA                   |
| ex3_60<br>09060_<br>x1 | CM00066<br>8.2/27209<br>849-<br>27209930       | 30 | #####  | 60   | 1 | GCTGTGATGGCCGAGTGGTTAAGGCGTTGGACTCGAAATCCAATGGGGTC<br>TCCCCGCGCAGGTTCAAATCCTGCTCACAGCG             |
| ex3_60<br>18723_<br>x1 | CM00068<br>2.2/30746<br>051-<br>30746117       | 13 | 0.009  | 26.3 | 1 | GGTAAATGACTGAGTAGGGCATTAGACTGTACATCTAAAAACAGAGGTCA<br>AGTCCTGTTTTTACCA                             |
| ex3_60<br>28422_<br>x1 | CM00066<br>4.2/13138<br>4241-<br>13138431<br>3 | 18 | 0.003  | 28.2 | 1 | TAGATTGAAGCCAGTTGATTAGGGTGTTTAGCTGTTAATTAATTTTCGTGG<br>GTTAAGTCCCGTCAATCTAG                        |
| ex3_60<br>41109_<br>x1 | CM00066<br>8.2/27532<br>208-<br>27532289       | 15 | 0.001  | 30.2 | 1 | GTAGTCGTGGCCGAGTGGTTAAGGCGATGGACTAGAAATCCATTGGGGTT<br>TCCCCACGCAGGTTCAATCCTGCCGACTACG              |
| ex3_60<br>49787_<br>x1 | CM00066<br>3.2/14970<br>8730-<br>14970866<br>0 | 15 | 0.0006 | 30.2 | 1 | GCAGTGGTGGTTCAGTGGTAGGGTTCTCGCCTCACACGCGGGAGACCCG<br>GGTCAAATCCCGGTCAAAGCA                         |

|                        |                                                |    |       |      |   |                                                                               |
|------------------------|------------------------------------------------|----|-------|------|---|-------------------------------------------------------------------------------|
| ex3_60<br>57824_<br>x1 | CM00066<br>3.2/23794<br>1074-<br>23794113<br>9 | 14 | 0.002 | 28.2 | 1 | GGTAAATGACTGAGTAAGCATTAGACTATAAATCTAAAGACAGAGGTCAA<br>GACCTCTTTTTACCA         |
| ex3_60<br>86981_<br>x1 | CM00066<br>9.2/14958<br>4725-<br>14958479<br>6 | 21 | ##### | 34.2 | 1 | GGGGGTATAGCTCAGGGGTAGAGCATTGACTGCAGATCAAGAGGTCTCT<br>GTTCAAATCCAGGTGCCCCCT    |
| ex3_60<br>90119_<br>x1 | CM00066<br>9.2/64110<br>164-<br>64110229       | 13 | 0.008 | 26.3 | 1 | GGTAAATGGCTGAGTAAGCATTAGACTGTAAATCTAAAGACAGAGGTCAA<br>GCCTCTTTTTTCCT          |
| ex3_60<br>90541_<br>x1 | KI270879.<br>1/243806-<br>243735               | 13 | 0.01  | 26.3 | 1 | TAGGATGTGGTGTATTATGTAGCACGGAGAATTTTGGATTCTCATGGGTAG<br>GTTCAATTCCTGTAATTCTAG  |
| ex3_61<br>03961_<br>x1 | CM00067<br>4.2/27690<br>373-<br>27690445       | 14 | 0.002 | 28.2 | 1 | ACCCAGATAGCTCAGTCAGTAGAGCATCAGACTTTTAATCTGAGGGTCCAA<br>GTTTCATGTCCCTTTTTGGGTG |
| ex3_61<br>16175_<br>x1 | CM00067<br>0.2/33015<br>199-<br>33015128       | 14 | 0.005 | 28.2 | 1 | TAGTACATAGTGTAATAGGTAGCACAGATAATTTTGGATTCTCAGGGGTAG<br>GTTCAATTCTTATAGTTCTAG  |
| ex3_61<br>41787_<br>x1 | CM00066<br>4.2/15526<br>3939-<br>15526401<br>1 | 14 | 0.004 | 28.2 | 1 | TAGATTGAAGCCACTTGATTAGGGTATTTAGCTGTAACTAAATTTTTGTGG<br>GTTAAGTCCCGTTAATCTAG   |
| ex3_61<br>43180_<br>x1 | CM00066<br>3.2/16875<br>463-<br>16875536       | 13 | 0.01  | 26.3 | 1 | GTCTCTGTGGTGCAATCGGTTAGCGCGTTCGGCTGTTAACCATAAGGTTG<br>GTGGTTAGAGACCACCAGGGACG |
| ex3_61<br>50395_<br>x1 | CM00066<br>8.2/26687<br>257-<br>26687329       | 21 | ##### | 42.1 | 1 | GGGAATTAGCTCAAGTGGTAGAGCGCTTGCTTAGCACGCAAGAGGTAGT<br>GGGATCGATGCCACATTCTCCA   |
| ex3_61<br>66629_<br>x1 | CM00066<br>9.2/64110                           | 14 | 0.002 | 28.2 | 1 | TAGATTGAAGCCAGTTGATTAGGGTGTTTAGCTGTAACTAAATTTTCGTG<br>GTTAAGTCCCACCAATCTAG    |

|                        |                                                |    |        |      |   |                                                                                                                      |  |
|------------------------|------------------------------------------------|----|--------|------|---|----------------------------------------------------------------------------------------------------------------------|--|
| x1                     | 327-<br>64110398                               |    |        |      |   |                                                                                                                      |  |
| ex3_61<br>84109_<br>x1 | CM00067<br>1.2/78741<br>572-<br>78741640       | 14 | 0.005  | 28.2 | 1 | AAGAGCTTAGCTTAATTAAGTGGTTGATTTGTGTTCAATTGATGCAGAATA<br>GAGTCTTGCAGTCCTTA                                             |  |
| ex3_62<br>10314_<br>x1 | CM00066<br>9.2/57194<br>203-<br>57194273       | 13 | 0.008  | 26.3 | 1 | AGTTGTAGAGGATAAGAGCTATCCATTGGTCTCAGGAACCAAAAATATTGG<br>TGCAACTCCAAATACAAGTA                                          |  |
| ex3_62<br>13134_<br>x1 | CM00067<br>8.2/33699<br>50-<br>3369882         | 15 | 0.001  | 30.2 | 1 | GGAAATATGTCCGACACAAGAATTACTTTGATAGAGTAAACAATAAAGGTTT<br>AAATCCTCTCATTCTA                                             |  |
| ex3_62<br>26588_<br>x1 | GL00025<br>3.2/68435<br>-68365                 | 18 | 0.003  | 28.2 | 1 | GGGGGTGTAGCTCAGTGGTAGAGCGCATGCTTTGCATGTATGAGGCCTCG<br>GTTCGATCCCCGACACCTCCA                                          |  |
| ex3_62<br>35967_<br>x1 | GL00025<br>1.2/23841<br>2-238484               | 16 | 0.0002 | 32.2 | 1 | GCCTGGATAGCTCAGTTGGTAGAACATCAGACTTTTAATCTGACGATGCAG<br>GGTTCAAGTCCCTGTTTCAGGCC                                       |  |
| ex3_62<br>37537_<br>x1 | CM00067<br>8.2/70778<br>281-<br>70778211       | 41 | #####  | 73.8 | 1 | GCATTGGTGGTTCAGTGGTAGAATTCTCGCCTGCCACGCGGGAGGCCCG<br>GGTTTGATTCCCGGCCAGTGCA                                          |  |
| ex3_62<br>53735_<br>x1 | CM00066<br>8.2/27605<br>745-<br>27605638       | 13 | 0.008  | 26.3 | 1 | GTCAGGATGGCCGAGTGGTCTAAGGCGCCAGACTCAAGCTTACTGCTTCC<br>TGTGTTCCGGTCTTCTGGTCTCCGTATGGAGGCGTGGGTTCGAATCCCAC<br>TTCTGACA |  |
| ex3_62<br>59611_<br>x1 | CM00066<br>3.2/16154<br>0241-<br>16154031<br>4 | 35 | #####  | 69.9 | 1 | GTCTCTGTGGCGCAATCGGTTAGCGGTTCCGGCTGTTAACCGAAAGGTTG<br>GTGGTTTCGATCCCACCCAGGGACG                                      |  |
| ex3_62<br>61570_<br>x1 | CM00066<br>3.2/14955<br>8493-<br>14955841<br>9 | 13 | 0.008  | 26.3 | 1 | GTCTCTGTGGCGCAATTGGTTAGCGGTTCCGGTTGTTAACCGTAAAGGTT<br>GGTGGTTTCGAGCCCACCCAGGAACG                                     |  |

|                        |                                                |    |        |      |   |                                                                               |
|------------------------|------------------------------------------------|----|--------|------|---|-------------------------------------------------------------------------------|
| ex3_62<br>67923_<br>x1 | CM00066<br>8.2/27576<br>067-<br>27576139       | 14 | 0.002  | 28.2 | 1 | ACCTGGGTAGCTCAGTAGGTAGAACATCAGACTTTTAATCTGAGGGTCTAG<br>GGTTCAAGTCCCTGTCCAGGCG |
| ex3_62<br>91923_<br>x1 | CM00066<br>4.2/21177<br>8006-<br>21177793<br>8 | 13 | 0.008  | 26.3 | 1 | AAGGGCTTAGCTTAATTAAGTGGTTTATTTGCGTTCAACTGATGCAGAATA<br>GAGTCTTGCAGCCCTTA      |
| ex3_63<br>26101_<br>x1 | CM00066<br>9.2/57186<br>344-<br>57186273       | 16 | 0.0003 | 32.2 | 1 | TAGGACGTGGTGTGATAGGTAGCATGGGGAATTTTGGATTCTCAGGGGTG<br>GGTTCAATTCCTATAGTTCTAG  |
| ex3_63<br>56549_<br>x1 | CM00067<br>3.2/10341<br>1122-<br>10341105<br>2 | 14 | 0.006  | 28.2 | 1 | GTTAATGTAGCTTAATTAATTTAAAGGAAGACACTGAAAATGTCTAGATGGGT<br>TTGCACAACCCCATAAACA  |

---

(b)

| Qseqid                 | Sseqid                         | NT | Evalue | Bitscore | Number | Sequence                                                                       |
|------------------------|--------------------------------|----|--------|----------|--------|--------------------------------------------------------------------------------|
| co3_131898<br>4_x14055 | AC092686.3/296<br>31-29561     | 30 | #####  | 60       | 14055  | GCAUUGGUGGUUCAGUGGUAGAAUUCUCGCCUGCCACGCG<br>GGAGGCCCGGGUUCGAUUCGCCGCAUGCA      |
| co3_140152<br>2_x13170 | GL000253.2/247<br>759-247830   | 30 | #####  | 60       | 13170  | TCCCTGGTGGTCTAGTGGTTAGGATTCGGCGCTCTACCGCC<br>GCGGCCCGGGTTCGATTCCCGGTCAGGGAA    |
| co3_147909<br>9_x12667 | AF347001.1/160<br>15-15948     | 20 | #####  | 40.1     | 12667  | CAGAGAAUAGUUUAAAUUAGAAUCUAGCUUUGGGUGCUAA<br>UGGUGGAGUUAAGACUUUUUCUCUGA         |
| co3_185684<br>9_x8797  | ENST00000387<br>461.2          | 17 | #####  | 34.2     | 8797   | CAGAGAATAGTTTAAATTAGAATCTTAGCTTTGGGTGCTAATG<br>GTGGAGTTAAAGACTTT               |
| co3_213255<br>2_x6512  | AF347015.1/160<br>4-1672       | 17 | #####  | 34.2     | 6512   | CAGAGUGUAGCUUAACACAAAGCACCCAACUACACUJAGG<br>AGAUUUAACUUAACUUGACCGCUCUGA        |
| co3_240741<br>3_x5455  | AC093311.2/140<br>036-139968   | 31 | #####  | 61.9     | 5455   | GUUCUUGUAGUUGAAUACAACGAUGGUUUUCAUAUCAUU<br>GGUCGUGGUUGUAGUCCGUGCGAGAAUA        |
| co3_323672<br>7_x3090  | ENST00000387<br>441.1          | 22 | #####  | 44.1     | 3090   | GTAAATATAGTTTAAACAAAACATCAGATTGTGAATCTGACAA<br>CAGAGGCTTACGACCCC               |
| co3_324290<br>6_x3085  | ENST00000387<br>342.1          | 17 | #####  | 34.2     | 3085   | CAGAGTGTAGCTTAACACAAAGCACCCAATTACACTTAGGA<br>GATTTCAACTTAACTTGA                |
| co3_355114<br>7_x2550  | CM000678.2/31<br>91501-3191573 | 40 | #####  | 79.8     | 2550   | GCCCGGCTAGCTCAGTCGGTAGAGCATGGGACTCTTAATCTC<br>AGGGTCGTGGGTTTCGAGCCCCACGTTGGGCG |

|                       |                                        |    |       |      |      |                                                                                         |
|-----------------------|----------------------------------------|----|-------|------|------|-----------------------------------------------------------------------------------------|
| co3_359915<br>6_x2502 | ENST00000387<br>449.1                  | 25 | ##### | 50.1 | 2502 | GAGAAAGCTCACAAGAACTGCTAACTCATGCCCCCATGTCTA<br>ACAACATGGCTTTCTCA                         |
| co3_361410<br>7_x2478 | CM000663.2/14<br>8302805-<br>148302734 | 26 | ##### | 52   | 2478 | GCCGTGATCGTATAGTGGTTAGTACTCTGCGTTGTGGCCGCA<br>GCAACCTCGGTTCTGAATCCGAGTCACGGCA           |
| co3_437415<br>5_x1469 | GL000252.2/133<br>42-13414             | 34 | ##### | 36.2 | 1469 | GCCTGGATAGCTCAGTTGGTAGAACATCAGACTTTTAATCTGA<br>CGGTGCAGGGTTCAAGTCCCTGTTCAGGCG           |
| co3_446501<br>2_x1366 | ENST00000387<br>421.1                  | 20 | ##### | 40.1 | 1366 | CACTGTAAAGCTAACTTAGCATTAACTTTTAAGTTAAAGATTA<br>AGAGAACCAACACCTC                         |
| co3_468900<br>9_x1180 | AF382005.1/581<br>-651                 | 30 | ##### | 60   | 1180 | GUUUAUGUAGCUUACCUCCUCAAGCAAUACACUGAAAAUG<br>UUUAGACGGGCUCACAUCACCCCAUAAACA              |
| co3_473880<br>7_x1138 | AC007298.17/14<br>5366-145295          | 38 | ##### | 75.8 | 1138 | UCCUCGUUAGUAGUAGUGGUGAGUAUCCCCGCCUGUCACGC<br>GGGAGACCGGGUUCGAUUCCCCGACGGGGAG            |
| co3_486830<br>9_x1036 | CM000663.2/14<br>5459658-<br>145459729 | 32 | ##### | 63.9 | 1036 | GGTTCATGGTGTAAATGGTGAGCACTCTGGACTCTGAATCCA<br>GCGATCCGAGTTCGAGTCTCGGTGGAACCT            |
| co3_497921<br>8_x963  | ENST00000387<br>377.1                  | 14 | ##### | 28.2 | 963  | AGTAAGGTCAGCTAAATAAGCTATCGGGCCCATACCCCGAAA<br>ATGTTGGTTATAACCCTC                        |
| co3_531494<br>9_x769  | CM000666.2/54<br>88322-5488403         | 23 | ##### | 30.2 | 769  | GATTTTATGGTGTAAATGGTGAGCACTCTGGACTTGGAATCCA<br>GAATTAACAAACAGAACATCCTGCAATTTTATTAAGAGCA |
| co3_545869<br>2_x705  | CM000664.2/20<br>2614781-<br>202614713 | 13 | 0.008 | 26.3 | 705  | AAGAGAGTCATAGAAGTTATGGGATTGGCTTGAACCAATTC<br>TGGAAGTTCAATTCCTTCTTTCTTG                  |

|                      |                                        |    |        |      |     |                                                                                                 |
|----------------------|----------------------------------------|----|--------|------|-----|-------------------------------------------------------------------------------------------------|
| co3_562622<br>7_x635 | AC006449.19/19<br>6857-196784          | 23 | 1E-08  | 46.1 | 635 | GUCUCUGUGGCGCAAUCGGUJAGCGCGUUCGGCUGUUAAC<br>CGAAAGGUJGGUGGUUCGAGCCCACCCAGGGACG                  |
| co3_656413<br>7_x325 | CM000668.2/28<br>658308-<br>28658237   | 20 | #####  | 40.1 | 325 | GGGGATGTAGCTCAGTGGTAGAGCGCATGCTTAGCATGCAT<br>GAGGTCCCGGGTTCGATCCCCAGCATCTCCA                    |
| co3_658576<br>0_x320 | CM000685.2/18<br>674981-<br>18674909   | 35 | #####  | 69.9 | 320 | GGTTCATAGTGTAGTGGTTATCACGTCTGCTTTACACGCAG<br>AAGTCTCGGGTTCGAGCCCCAGTGGAAACCA                    |
| co3_665542<br>2_x303 | CM000678.2/10<br>721693-<br>10721625   | 26 | #####  | 28.2 | 303 | GTAATATAGTTTAAACAAAACATTAGACTATGAATCTAACAAT<br>AGAAGCCCGCAACTTCTTATCTACC                        |
| co3_677739<br>3_x274 | AC008443.10/43<br>006-42934            | 23 | #####  | 46.1 | 274 | GUUUCGUGUAGUGUAGUGGUUAUCACGUUCGCCUCACACGC<br>GAAAGGUCCCCGGUUCGAAACCGGGCGGAAACA                  |
| co3_681552<br>0_x266 | CM000681.2/41<br>242309-<br>41242237   | 29 | #####  | 34.2 | 266 | GCCAGGATAGTTCAGGTGGTAGAGCATCAGACTTTTAACTG<br>AGGGTTCAGGGTTCAAGTCTCTGTTTGGGCG                    |
| co3_684496<br>1_x260 | CM000669.2/14<br>9691252-<br>149691181 | 24 | #####  | 32.2 | 260 | GGGGATATAGCTCAGGGGTAGAGCATTTGACTGCAGATCAAG<br>AGGTCCCCGGTTCAAATCCGGGTGCCCCCC                    |
| co3_689431<br>8_x249 | CM000663.2/16<br>1612718-<br>161612789 | 16 | 0.0003 | 32.2 | 249 | GCGTTGGTGGTGTAGTGGTGAGCACAGCTGCCTTTCAAGCA<br>GTTAACGCGGGTTCGATTCCCGGGTAACGAA                    |
| co3_692837<br>8_x242 | ENST00000387<br>409.1                  | 32 | #####  | 63.9 | 242 | GGTAAATGGCTGAGTGAAGCATTGGACTGTAAATCTAAAGA<br>CAGGGGTTAGGCCTCTTT                                 |
| co3_699745<br>4_x228 | CM000681.2/45<br>478687-<br>45478602   | 22 | #####  | 44.1 | 228 | GCCCGGATGATCCTCAGTGGTCTGGGGTGCAGGCTTCAAAC<br>CTGTAGCTGTCTAGCGACAGAGTGGTTCAATTCCACCTTTCCG<br>GGC |

|                      |                                        |    |       |      |     |                                                                               |
|----------------------|----------------------------------------|----|-------|------|-----|-------------------------------------------------------------------------------|
| co3_719623<br>6_x190 | AL163195.5/370<br>2-3774               | 18 | ##### | 28.2 | 190 | GGCUCCAUAGCUCAGGGGUUAGAGCACUGGUCUUGUAAAC<br>CAGGGGUCGCGAGUUCAAUCUCGCGGGGCCU   |
| co3_725411<br>7_x181 | AF346992.1/158<br>90-15955             | 29 | ##### | 58   | 181 | GUCCUUGUAGUAAAACUAAUACACCAGUCUUGUAAACCGG<br>AGAUGAAAACCUUUUJCCAAGGACA         |
| co3_739392<br>1_x159 | AF381996.2/426<br>5-4333               | 17 | ##### | 34.2 | 159 | AGAAUAUGUCUGAUAAAAGAGUUACUUUGAUAGAGUAAAU<br>AAUAGGAGCUUAAACCCCUUAAUUUCUA      |
| co3_739771<br>7_x158 | AF347015.1/582<br>7-5762               | 17 | ##### | 34.2 | 158 | AGCUCCGAGGUGAUUUUCAUUAUUGAAUUGCAAUUCGAAGA<br>AGCAGCUCAAACCUGCCGGGGCUU         |
| co3_742741<br>5_x153 | ENST00000387<br>365.1                  | 17 | ##### | 34.2 | 153 | AGAAATATGTCTGATAAAAGAGTTACTTTGATAGAGTAAATAA<br>TAGGAGCTTAAACCCCC              |
| co3_743686<br>5_x152 | CM000678.2/33<br>69813-3369884         | 18 | ##### | 28.2 | 152 | TAGGACTTGGTGTAAATGGGTAGCACAGAGAATTTTGGATTCT<br>CAGGGGTGGGTTCATTCCTTTTCGTCCTAG |
| co3_745534<br>1_x149 | CM000669.2/13<br>9340700-<br>139340772 | 21 | ##### | 42.1 | 149 | GCCCCAGTGGCCTAATGGATAAGGCATTGGCCTCCTAAGCCA<br>GGGATTGTGGGTTCGAGTCCCATCTGGGGTG |
| co3_746186<br>0_x148 | ENST00000387<br>405.1                  | 14 | ##### | 28.2 | 148 | AGCTCCGAGGTGATTTTCATATTGAATTGCAAATTCGAAGAAG<br>CAGCTCAAACCTGCCG               |
| co3_747677<br>7_x145 | CM000668.2/27<br>777885-<br>27777956   | 21 | ##### | 42.1 | 145 | AGCAGAGTGGCGCAGCGGAAGCGTGCTGGGCCATAACCCA<br>GAGGTCGATGGATCTAAACCATCCTCTGCTA   |
| co3_751010<br>8_x140 | GL000256.2/253<br>971-254043           | 22 | ##### | 44.1 | 140 | GCCTCCTTAGCGCAGTAGGCAGCGCGTCAGTCTCATAATCTG<br>AAGTCCTGAGTTCGAACCTCAGAGGGGGCA  |

|                      |                                        |    |       |      |     |                                                                                              |
|----------------------|----------------------------------------|----|-------|------|-----|----------------------------------------------------------------------------------------------|
| co3_756071<br>8_x133 | CM000663.2/15<br>0045476-<br>150045406 | 20 | ##### | 32.2 | 133 | GGGGGTGTAGATCAGTGGTAGGGCGCACGCTTAGCATGCAT<br>GAGGCCCTGGGTCAATCCCCAGCACCTCCA                  |
| co3_766146<br>5_x120 | ENST00000387<br>456.1                  | 37 | ##### | 73.8 | 120 | ACTTTTAAAGGATAACAGCTATCCATTGGTCTTAGGCCCCAAA<br>AATTTTGGTGCAACTCC                             |
| co3_775409<br>8_x108 | AF346999.1/440<br>2-4331               | 32 | ##### | 63.9 | 108 | UAGGAUGGGGUGUGAUAGGUGGCACGGAGAAUUUUGGAUU<br>CUCAGGGAUGGGUUCGAUUCUCAUAGUCCUAG                 |
| co3_778768<br>1_x104 | CM000663.2/16<br>1440242-<br>161440171 | 19 | ##### | 30.2 | 104 | GCGTTGGTGGTATAGTGGTGAGCATAGTTGCCTTCCAAGCAG<br>TTGACCCGGGCTCGATTCCCGCCCAACGCA                 |
| co3_784054<br>7_x97  | CM000663.2/93<br>847573-<br>93847657   | 34 | ##### | 67.9 | 97  | GGCTCCGTGGCGCAATGGATAGCGCATTGGACTTCTAGAGG<br>CTGAAGGCATTCAAAGGTTCCGGGTTGAGTCCCGGCGGAG<br>TCG |
| co3_791212<br>0_x89  | AC005329.1/704<br>3-6971               | 22 | ##### | 44.1 | 89  | GCCGAAAUAGCUCAGUUGGGAGAGCGUUAGACUGAAGAUC<br>UAAAGGUCCUGGUUCGAUCCCGGGUUUCGGCA                 |
| co3_791692<br>6_x89  | ENST00000386<br>347.1                  | 27 | ##### | 54   | 89  | GTTAAGATGGCAGAGCCCGGTAATCGCATAAACTTAAACT<br>TTACAGTCAGAGGTTCAA                               |
| co3_795618<br>3_x85  | AC008443.10/82<br>40-8321              | 20 | ##### | 40.1 | 85  | GGUAGCGUGGCCGAGCGGUCUAAGGCGCUGGAUUAAGGCU<br>CCAGUCUCUUCGGGGCGUGGGUUCGAAUCCACCGCUGC<br>CA     |
| co3_797018<br>7_x83  | CM000678.2/10<br>721565-<br>10721495   | 38 | ##### | 28.2 | 83  | ACTTTTAAAGGATAAGAGTTATCCATTGGTCTCAGGAACCAAA<br>AACATCGGTGCAACTCCAATAAAAGTA                   |

|                     |                                        |    |       |      |    |                                                                                                   |
|---------------------|----------------------------------------|----|-------|------|----|---------------------------------------------------------------------------------------------------|
| co3_802363<br>2_x78 | CM000676.2/20<br>683273-<br>20683361   | 15 | ##### | 30.2 | 78 | CCTTCGATAGCTCAGCTGGTAGAGCGGAGGACTGTAGTACTT<br>AATGTGTGGTCATCCTTAGGTCGCTGGTTCGATTCCGGCTCG<br>AAGGA |
| co3_810758<br>0_x70 | AL352978.6/119<br>697-119770           | 22 | ##### | 36.2 | 70 | GGCCGGUUAGCUCAGUUGGUUAGAGCGUGGUGCUAAUAAC<br>GCCAAGGUCGCGGGUUCGAUCCCCGUACGGGCCA                    |
| co3_812181<br>5_x69 | GL000251.2/124<br>019-123948           | 24 | ##### | 32.2 | 69 | GTGGATGTAGTTTAGTGGTAGAACGCGCGCTTTGCATGTATG<br>AGTCCCAGTTTTCGATCCCTGGCGTTTCCA                      |
| co3_818350<br>1_x63 | CM000676.2/20<br>677100-<br>20677019   | 15 | ##### | 30.2 | 63 | GGTAGTGTGGTTGAATGGTCTAAGGCACTGAATTTAGGCTCC<br>AGTCTCTTTGGGGACGTGGGTTTAAATCCCCTGCTGCAA             |
| co3_822052<br>0_x60 | CM000670.2/67<br>585468-<br>67585398   | 23 | ##### | 46.1 | 60 | ACTTTTAAAGGATGAGAGTCATCCGTTGGTCTTAAGAACCAAA<br>AACACTGGTGCAACTCCAATAAAAGTA                        |
| co3_822130<br>0_x60 | CM000670.2/13<br>3755832-<br>133755767 | 16 | ##### | 32.2 | 60 | GGTAAATGACTGAATAAGCCTTAGACTGTAAATCTGAAGACA<br>GAGGTCAAGGCCTCTTTTACCA                              |
| co3_824517<br>2_x58 | ENST00000387<br>439.1                  | 21 | ##### | 42.1 | 58 | TGGTATATAGTTTTAAACAAAACGAATGATTTGACTCATTAAAT<br>TATGATAATCATATTT                                  |
| co3_825611<br>1_x57 | AC018638.5/469<br>4-4623               | 22 | ##### | 44.1 | 57 | GGCUCGUUGGUCUAGGGGUUAUGAUUCUCGCUUAGGGUGC<br>GAGAGGUCCCCGGUUCAAAUCCCGGACGAGCCC                     |
| co3_827084<br>0_x56 | CM000664.2/22<br>3321669-<br>223321597 | 26 | ##### | 28.2 | 56 | GTTGGGGTAACTCAGTTGGTAGAGTAGCAGACTTTTCATCTG<br>AGGGTCCAGGGTTTAAGTCCATGTCCAGGCA                     |
| co3_829610<br>0_x54 | CM000674.2/49<br>817479-<br>49817409   | 27 | 3E-06 | 38.2 | 54 | TAGGATGTGGTGTGATAGGTAGCATGGAGAATTTTGGATTCT<br>CAGGGGTAGGTTCAATTCCTATATTCTAG                       |

|                     |                                        |    |       |      |    |                                                                                                        |
|---------------------|----------------------------------------|----|-------|------|----|--------------------------------------------------------------------------------------------------------|
| co3_835501<br>1_x50 | GL000252.2/861<br>6-8544               | 18 | 0.002 | 28.2 | 50 | GGCCGCGTGGCCTAATGGATAAGGCGTCTGATTCCGGATCA<br>GAAGATTGAGGGTTCGAGTCCCTTCGTGGTCCG                         |
| co3_837374<br>2_x49 | CM000674.2/98<br>504252-<br>98504323   | 19 | ##### | 38.2 | 49 | GACCTCGTGGCGCAACGGTAGCGCGTCTGACTCCAGATCAG<br>AAGGCTGCGTGTTTCAATCACGTCCGGGTCA                           |
| co3_845278<br>4_x43 | CM000676.2/72<br>962971-<br>72963042   | 21 | ##### | 34.2 | 43 | GGGGGTATAGCTCAGGGGTAGAGCATTGACTGCAGATCAA<br>GAGGTCCCCGGTTCAAATCCGGGTGCCCCCT                            |
| co3_846528<br>3_x42 | CM000666.2/15<br>5461250-<br>155461315 | 13 | ##### | 26.3 | 42 | GGTAAAGTGGCTGAATAAGCATTAGACTGTAAATCTAAAGACA<br>GAGGTCAAGGCCTCTTTTTAGCA                                 |
| co3_847015<br>5_x42 | CM000679.2/81<br>39525-8139452         | 34 | ##### | 67.9 | 42 | GGCGCCGTGGCTTAGCTGGTTAAAGCGCCTGTCTAGTAAACA<br>GGAGATCCTGGGTTTCAATCCCAGCGGTGCCT                         |
| co3_847897<br>5_x42 | CM000681.2/39<br>412260-<br>39412168   | 21 | ##### | 42.1 | 42 | GCTCCAGTGGCGCAATCGGTTAGCGCGCGGTACTTATATGAC<br>AGTGCGAGCGGAGCAATGCCGAGGTTGTGAGTTCGATCCTC<br>ACCTGGAGCA  |
| co3_848350<br>6_x41 | CM000665.2/45<br>689071-<br>45688999   | 15 | ##### | 30.2 | 41 | GGGCCAGTGGCGCAATGGATAACGCGTCTGACTACGGATCA<br>GAAGATTCTAGGTTTCAATCCCTTCGTGGTCCG                         |
| co3_852940<br>2_x38 | CM000668.2/26<br>299677-<br>26299749   | 14 | ##### | 28.2 | 38 | GACCACGTGGCCTAATGGATAAGGCGTCTGACTTCGGATCAG<br>AAGATTGAGGGTTCGAATCCCTTCGTGGTTA                          |
| co3_855478<br>9_x37 | CM000676.2/20<br>657557-<br>20657464   | 17 | ##### | 26.3 | 37 | CCTTCGATAGCTCAGCTGGTAGAGCGGAGGACTGTAGATTGT<br>ATAGACATTTGCGGACATCCTTAGGTCGCTGGTTCGATTCCA<br>GCTCGAAGGA |
| co3_857395<br>4_x36 | CM000669.2/67<br>399631-<br>67399560   | 16 | ##### | 32.2 | 36 | GGCCTCATGGTGCAACAGTAGTGTGTCTGACTCCAGATCAGA<br>AGTTGTATGTTCAAATCACGTAGGGGTCA                            |

|                     |                                        |    |       |      |    |                                                                                         |
|---------------------|----------------------------------------|----|-------|------|----|-----------------------------------------------------------------------------------------|
| co3_857818<br>4_x35 | J01415.2/7514-<br>7446                 | 21 | ##### | 42.1 | 35 | GAAAAAGTCATGGAGGCCATGGGGTTGGCTTGAAACCAGCTT<br>TGGGGGTTTCGATTCCTTCCTTTTTTG               |
| co3_858602<br>4_x35 | CM000668.2/27<br>293892-<br>27293965   | 33 | ##### | 42.1 | 35 | GGCCGGTTAGCTCAGTTGGTTAGAGCGTGCTGCTACTAATGC<br>CAGGGTTCGAGGTTTCGATCCCCGTACGGGCCT         |
| co3_858644<br>4_x35 | CM000686.2/83<br>71587-8371660         | 13 | ##### | 26.3 | 35 | GTTAAGATGGCAGAACCTGGCAGTTTCATAAACTTAAAGTTT<br>ATAATCAGAGGTTCAACTCCTCTTCTTAACA           |
| co3_864081<br>5_x32 | CM000673.2/59<br>551755-<br>59551837   | 24 | ##### | 40.1 | 32 | ACCAGAATGGCCGAGTGGTTAAGGCGTTGGACTTAAGATCCA<br>ATGGATTCATATCCGCGTGGGTTTGAACCCCACTTCTGGTA |
| co3_864225<br>5_x32 | ENST00000387<br>392.1                  | 30 | ##### | 60   | 32 | AAGGGCTTAGCTTAATTAAGTGGCTGATTTGCGTTCAGTTGA<br>TGCAGAGTGGGGTTTTG                         |
| co3_864777<br>0_x31 | ENST00000387<br>419.1                  | 20 | ##### | 40.1 | 31 | AAGGTATTAGAAAAACCATTTTCATAACTTTGTCAAAGTTAAATT<br>ATAGGCTAAATCCTAT                       |
| co3_864987<br>8_x31 | CM000664.2/45<br>710374-<br>45710302   | 14 | ##### | 28.2 | 31 | GGCTGTGTACCTCAGTGGGCAAGGGTATGGACTTTGAAGCC<br>AGACTATTTGGGTTCAAATCCCAGCTTGGCCT           |
| co3_865006<br>4_x31 | GL000250.2/777<br>22-77651             | 30 | ##### | 44.1 | 31 | GGGGGTATAGCTCAGCGGTAGAGCGCGTGCTTAGCATGCAC<br>GAGGTCCTGGGTTCAATCCCCAATACCTCCA            |
| co3_867168<br>3_x30 | CM000665.2/10<br>6894213-<br>106894143 | 14 | ##### | 28.2 | 30 | ACTTTTAAAGGATAGGAGTTATCTATTGATCTTAGGAACCAAA<br>AACATTGGTTCAACTCCAAGTAAAGGTA             |
| co3_868421<br>2_x29 | CM000668.2/27<br>664766-<br>27664841   | 27 | ##### | 30.2 | 29 | GCCGAAATAGCTCAATTGGGAGAGTGTTAGACTGAAGATCTT<br>CTGCAGGTCTCTGGTTCATTCCGGGTTTCGACA         |

|                     |                                        |    |       |      |    |                                                                                                       |
|---------------------|----------------------------------------|----|-------|------|----|-------------------------------------------------------------------------------------------------------|
| co3_872062<br>8_x28 | CM000663.2/14<br>9558493-<br>149558419 | 28 | ##### | 56   | 28 | GTCTCTGTGGCGCAATTGGTTAGCGCGTTCGGTTGTTAACCG<br>TAAAGGTTGGTGGTTCGAGCCCACCCAGGAACG                       |
| co3_872294<br>6_x27 | CM000684.2/36<br>179392-<br>36179460   | 30 | ##### | 52   | 27 | GGAAATATGTCTGATAAGAGAGTTACTTTGACAGAGTAAATTA<br>CAGAGGTTTTAAATCTTCCTATTTCTA                            |
| co3_873944<br>3_x27 | CM000669.2/14<br>9556711-<br>149556780 | 18 | ##### | 36.2 | 27 | GGCGTATAGCTCAGGGGTAGAGCATTGACTGCAGATCAA<br>GAGGTCCCAGTTCAAATCTGGGTGCCCA                               |
| co3_873984<br>8_x27 | CM000664.2/21<br>8245826-<br>218245918 | 21 | ##### | 34.2 | 27 | CCTTCAATAGTTCAGCTGGTAGAGCAGAGGACTATAGCTACT<br>TCCTCAGTAGGAGACGTCCTTAGGTTGCTGGTTCGATTCCAG<br>CTTGAAGGA |
| co3_876114<br>5_x26 | CM000666.2/75<br>04618-7504555         | 18 | ##### | 28.2 | 26 | GGCTGGGAAGCCAGCCCTGGGGTCCAGAGCCAGATGGATGT<br>GGTTCAAATCCCACCACAGCCA                                   |
| co3_877051<br>3_x25 | CM000664.2/30<br>054702-<br>30054774   | 16 | ##### | 32.2 | 25 | GGCCAGTGGCTCAATGGATAATGCGTCTGACTAAGAATCAG<br>AAGATTCCAGCCTTGACTCCTGGCTGGCTCA                          |
| co3_877398<br>8_x25 | CM000670.2/46<br>827965-<br>46828036   | 34 | ##### | 28.2 | 25 | TACGACATGGTGTAAATAAGTAGCACAGAGAATTTTGGGTTCTC<br>AGGGGTAGGTTCAATTCCCATAGTTCTAG                         |
| co3_878221<br>3_x25 | CM000671.2/11<br>0198523-<br>110198595 | 14 | ##### | 28.2 | 25 | GGCCGTGTGGCCTAATGGATAAGGCGTCTGACTTCGGATCAA<br>AAGATTGCAGGTTTGAGTTCTGCCACGGTCG                         |
| co3_880144<br>1_x24 | AF134583.1/159<br>9-1666               | 23 | ##### | 46.1 | 24 | AGAAUUUAGGUUAAAUACAGACCAAGAGCCUUCAAAGCCC<br>UCAGUAAGUUGCAAUACUAAUUUCUG                                |
| co3_883520<br>4_x22 | CM000668.2/26<br>687257-<br>26687329   | 25 | ##### | 34.2 | 22 | GGGAATTAGCTCAAGTGGTAGAGCGCTTGCTTAGCACGCAA<br>GAGGTAGTGGGATCGATGCCACATTCTCCA                           |

|                     |                                        |    |        |      |    |                                                                                          |
|---------------------|----------------------------------------|----|--------|------|----|------------------------------------------------------------------------------------------|
| co3_883725<br>0_x22 | CM000668.2/27<br>545689-<br>27545770   | 46 | #####  | 91.7 | 22 | GTAGTCGTGGCCGAGTGGTTAAGGCGATGGACTTGAAATCCA<br>TTGGGGTTTTCCCCGCGCAGGTTTCAATCCTGCCGACTACG  |
| co3_884576<br>4_x22 | CM000679.2/40<br>117373-<br>40117300   | 20 | #####  | 32.2 | 22 | GACCGTGTGGCCTTAATGGATAAGGTGTCTGACTTCAGATCA<br>GAAGATTGAGGGTTTGAGTCCCTTTGTGGTCA           |
| co3_885547<br>1_x21 | CM000663.2/14<br>8246758-<br>148246831 | 39 | #####  | 30.2 | 21 | GTCTCTGTGGCGCAATCGGTCAGAGCGTTTCGGCTATTAACCG<br>AACGGTGAGTAGTTCAAGACCACCCAGGGACG          |
| co3_886376<br>6_x21 | CM000668.2/27<br>618356-<br>27618429   | 13 | 0.009  | 26.3 | 21 | GGCCCTGTAGCTCAGCGGTTGGAGCGCTGGTCTCGTAAACC<br>TAGGGGTCGTGAGTTCAAATCTCACCAGGGCCT           |
| co3_888770<br>8_x20 | CM000673.2/11<br>3562356-<br>113562273 | 14 | #####  | 28.2 | 20 | ACCAGGATGGCCAAGTAGTTAAAGGCACTGGACTTAAGAGCC<br>AATGGACATATGTCTGTGTGGGTTTGAACCCCACTCCTGGTG |
| co3_888844<br>8_x20 | AF134583.1/181<br>6-1744               | 19 | #####  | 38.2 | 20 | UAGAUUGAAGCCAGUUGAUUAGGGUGCUUAGCUGUUAACU<br>AAGUGUUUGUGGGUUUAAGUCCCAUUGGUCUAG            |
| co3_893819<br>7_x18 | CM000668.2/26<br>705377-<br>26705449   | 14 | #####  | 28.2 | 18 | GGGAATTAGCTCAAGCGGTAGAGCGCTTGCTTAGCATGCAA<br>GAGGTAGTGGGATCGATGCCACATTCTCCA              |
| co3_894870<br>7_x17 | CM000674.2/26<br>572619-<br>26572687   | 27 | 0.001  | 30.2 | 17 | AAGGAGTTAGCTCAATTAAGTGATTGATTTGCATTCAGTTGA<br>TGTAAGATAAGATCTTGACAGTCCTTA                |
| co3_899087<br>0_x16 | CM000666.2/40<br>906798-<br>40906726   | 34 | #####  | 44.1 | 16 | GACCATGTGGCCTAAGGGAAAAGACATCTCACTTTGGGTCAG<br>AAGATTGAGGGTTCAAGTCTTTTCATGGTCA            |
| co3_899717<br>4_x16 | CM000663.2/23<br>7942562-<br>237942633 | 28 | 0.0004 | 32.2 | 16 | TAGGACTTGGTGTAATAGGTAGCACGAAGAGATTTGGATTCT<br>CAGGGGTAGGTTCAATTCCTATAGTTCTGG             |

|                     |                                        |    |        |      |    |                                                                                                  |
|---------------------|----------------------------------------|----|--------|------|----|--------------------------------------------------------------------------------------------------|
| co3_900074<br>2_x16 | CM000663.2/22<br>2465005-<br>222465077 | 19 | #####  | 30.2 | 16 | GGCTCCATAGCTCAGTGGTTAGAGCACTGGTCTTGTAACCA<br>GGGGTCGCGAGTTCGATCCTCGCTGGGGCCT                     |
| co3_900466<br>8_x15 | CM000668.2/15<br>6547986-<br>156547912 | 15 | #####  | 30.2 | 15 | GTTAAGACGGCAGAGCCCGGCAATTGCGTAAAATTTACA<br>TTATGGGCAGAGGTTCAATTCCTCTTCTTAACA                     |
| co3_902214<br>3_x15 | CM000679.2/64<br>530873-<br>64530800   | 16 | 0.0001 | 32.2 | 15 | AGCACCATGGCTTAGCTGGTTAAAGCACCTGTCTAGTAAACA<br>GGAGATCCTGAGTTTCAATTCGAATGGTGCCT                   |
| co3_902449<br>8_x15 | CM000681.2/12<br>188561-<br>12188634   | 34 | #####  | 28.2 | 15 | GGCTCTGTGGCTTTGTGGGTTAAAGTACTTGTCTGGCAAACA<br>GGAGATGCTGGATTTCAATCCAGCAGGGCCT                    |
| co3_905407<br>6_x14 | CM000676.2/20<br>613862-<br>20613790   | 22 | #####  | 36.2 | 14 | GGCTCCATAGCTCAGGGGTTAGAGCGCTGGTCTTGTAACCA<br>GGGGTCGCGAGTTCGAATTCGCTGGGGCCT                      |
| co3_909912<br>2_x12 | CM000664.2/13<br>0273728-<br>130273656 | 16 | #####  | 32.2 | 12 | TAGATTGAAGCCAGTTGATTAGGGTGTATCTGTAAATTTAA<br>TGTTCTGGGTTTAAAGTCCCATCAATCTAG                      |
| co3_914925<br>3_x11 | CM000685.2/14<br>3434095-<br>143434024 | 18 | 0.004  | 28.2 | 11 | TAGGATATGGTATATTAGGTAGCACAAAGAATTTGAATTCTC<br>AGGGGTAGATTCAATTCCTATAATTCTAG                      |
| co3_919844<br>3_x10 | CM000679.2/22<br>528921-<br>22528853   | 22 | #####  | 36.2 | 10 | GAAAAAGTCATAGGGGTTATGAGGCTGGCTTGAAACCAGCCT<br>TAGGAGGTTCAATTCCTTCTTTTTTG                         |
| co3_921103<br>2_x9  | CM000678.2/14<br>285893-<br>14285964   | 35 | #####  | 61.9 | 9  | GGCGCGGTGGCCAAGTGGTAAGGCGTCGGTCTCGTAAACCG<br>AAGATCACGGGTTTGAACCCCGTCCGTGCCT                     |
| co3_921269<br>7_x9  | CM000670.2/65<br>697384-<br>65697297   | 22 | #####  | 28.2 | 9  | TCTTCAATAGCTCAGCTGGTAGAGCGGAGGACTGTAGGTGCA<br>CGCCCGTGGCCATTCTTAGGTGCTGGTTTGATTCCGACTTGG<br>AGAG |

|                    |                                        |    |        |      |   |                                                                                        |
|--------------------|----------------------------------------|----|--------|------|---|----------------------------------------------------------------------------------------|
| co3_927764<br>2_x8 | CM000676.2/88<br>979098-<br>88979170   | 18 | #####  | 28.2 | 8 | GGGAATTAGCTCAAGTGGTAGAGCGCTCGCTTAGCATGCG<br>AGAGGTAGTGGGATCGATGCCCGCATTCTCCA           |
| co3_927996<br>4_x7 | CM000673.2/10<br>9165312-<br>109165393 | 13 | #####  | 26.3 | 7 | TGAGTTGTAGCTGAGTGGTTAAGGCAACGAGCTAGAAATTCG<br>TTGGTTTCTCTCTGTGCAGGTTTGAATCCTGCTAATTATG |
| co3_928046<br>8_x7 | CM000670.2/66<br>114189-<br>66114261   | 23 | 1E-08  | 46.1 | 7 | GGGGATTAGCTCAAATGGTAGAGCGCTCGCTTAGCATGCG<br>AGAGGTAGCGGGATCGATGCCCGCATCCTCCA           |
| co3_930525<br>5_x7 | CM000673.2/92<br>75243-9275316         | 28 | #####  | 32.2 | 7 | GCCTCCTTAGTG CAGTAGGTAGCGCATCAGTCTCAAATCTG<br>AATGGTCCTGAGTTCAAGCCTCAGAGGGGGCA         |
| co3_931276<br>6_x7 | ENST00000387<br>429.1                  | 21 | #####  | 42.1 | 7 | ACTCTTTTAGTATAAATAGTACCGTAACTTCCAATTAAGT<br>TTTGACAACATTCAA                            |
| co3_932103<br>3_x7 | ENST00000387<br>400.1                  | 27 | #####  | 54   | 7 | TAGATTGAAGCCAGTTGATTAGGGTGCTTAGCTGTAACTAAG<br>TGTTTGTGGGTTTAAGT                        |
| co3_933021<br>4_x6 | CM000668.2/69<br>204486-<br>69204568   | 18 | #####  | 28.2 | 6 | ACTCATTGGCTGAGTGGTTAAGGCATTGGACTTAAGATCCA<br>ATGGAGTAGTGGCTGTGTGGGTTTAAACCCCACTACTGGTA |
| co3_935002<br>0_x6 | CM000683.2/35<br>891030-<br>35891100   | 13 | #####  | 26.3 | 6 | GAGGATTTAGTTTAAATTAATGTTTGTATTGCATTCAATTGAT<br>GTAAGATAGAGAGTGTGCAGTCCTTA              |
| co3_936440<br>8_x6 | CM000669.2/14<br>1803557-<br>141803628 | 22 | #####  | 28.2 | 6 | TAGGACGTGGTGTAGTAGGTAGCATGGAGAATGTTGAATTCT<br>CAGGGGTAGGTTCAATTCCTATAGTTCTAG           |
| co3_938024<br>8_x5 | CM000663.2/14<br>6488866-<br>146488936 | 20 | 0.0002 | 32.2 | 5 | GCGTCAGTGGTTTAGTGGTGAATTCCTGCCTCCCATGCACG<br>AGATCCGTGTTCAACTCCTGGTTGGTGCA             |

|                    |                                        |    |       |      |   |                                                                               |
|--------------------|----------------------------------------|----|-------|------|---|-------------------------------------------------------------------------------|
| co3_938186<br>3_x5 | CM000685.2/55<br>178915-<br>55178987   | 35 | 8E-11 | 54   | 5 | TAGATTGAAGCCAGTTGATTAGGGTGTTTAGCTGTTAACGAAA<br>TTTTCGTGGGTTTGAATTCCACCAATCTAG |
| co3_939353<br>3_x5 | CM000665.2/10<br>6894340-<br>106894273 | 13 | 0.008 | 26.3 | 5 | GTAGTTATAGTTTAATTAACATTAGATTGTGGATCTAATAATA<br>GAAGTCTACAGCTTCTTACCTACC       |
| co3_942889<br>8_x5 | CM000668.2/57<br>861238-<br>57861166   | 21 | ##### | 26.3 | 5 | GGGAATTAGCGCAAGTGGTAGAGTGCTTGCTTAGCATGCAA<br>GAGGTAGTGGGATCGATGCCACATTCTCCA   |
| co3_943475<br>8_x5 | CM000685.2/10<br>2010285-<br>102010355 | 13 | ##### | 26.3 | 5 | GTTAGTGTAGCTTAATATGGTAAAGCAAGGCACTGAAAGTGC<br>GTAGATGAGTTCATGTAACTCCATAACA    |
| co3_943779<br>8_x5 | CM000669.2/14<br>9406135-<br>149406064 | 32 | ##### | 32.2 | 5 | GGGGGTATAGCTGAGGAGTAAACCATTTGGCTGCAGATCAAG<br>TGGTCCCTGGTTCAAATATGGGTGCCCTCT  |
| co3_944419<br>6_x4 | CM000669.2/14<br>9363270-<br>149363207 | 22 | ##### | 28.2 | 4 | GTGGATATAGTCTGCATTTGACTGCAAATTAAGAAGTCTCTG<br>GTTCAAATCCAGCTGTCCCCT           |
| co3_945595<br>2_x4 | CM000664.2/11<br>7026500-<br>117026435 | 17 | ##### | 26.3 | 4 | GGTAAATGACTGAGTAAGCGTTAGACTGTAAATCAAAGAT<br>GGAGGTCAAGGCCTCCTTTTACCA          |
| co3_946446<br>0_x4 | KI270803.1/6677<br>33-667803           | 15 | ##### | 30.2 | 4 | GTTAATGTAGCTTAATTATTTAAAGCAAGACTGAAAATGTC<br>TAGATGGGCTTATACAGCCCCATAACA      |
| co3_948082<br>4_x4 | CM000672.2/36<br>434683-<br>36434615   | 33 | ##### | 34.2 | 4 | GTAATATAGTTTGTAGTCAAATATTAGATTGTGGATCTGATAAT<br>AGAAGTCTGTAACCTTCTTATTTACT    |
| co3_952478<br>8_x3 | CM000670.2/79<br>428812-<br>79428742   | 14 | ##### | 28.2 | 3 | GGCACTGTAGTTTGGATTGAGAAACACAGGCTTTAGAGGCAG<br>AAGTTCTGGGTTCAAACCCAGCATTGCCA   |

|                    |                                        |    |        |      |   |                                                                                |
|--------------------|----------------------------------------|----|--------|------|---|--------------------------------------------------------------------------------|
| co3_957686<br>8_x3 | CM000672.2/55<br>597818-<br>55597888   | 13 | #####  | 26.3 | 3 | GTTAATGTAGCTTAATTATTTAAAGCAAGGCACTGAAAATGCC<br>TAGATGGGTCCGCAAACCCCATAAACA     |
| co3_958251<br>1_x3 | CM000669.2/68<br>098326-<br>68098258   | 13 | #####  | 26.3 | 3 | GAGAAGGTCATAGAGGTTATGGGATTGGCTTGAAACCAGTTT<br>CTGGAGGTTCCATTCTTTCTTTTTTCG      |
| co3_962305<br>0_x3 | CM000685.2/11<br>9603898-<br>119603966 | 15 | #####  | 30.2 | 3 | GCAGCTGTGGCTCAGTGGAAAGAGCATCAGTCTGGGTATCA<br>GAAGACCTAGGTCTAGCCCCAGCTGTA       |
| co3_967836<br>9_x2 | CM000676.2/61<br>184426-<br>61184490   | 15 | #####  | 30.2 | 2 | GACAGTTTGGCTTAGTGGTTAAGAGCTTTGGTACCAGATGGA<br>ATGGGTTCAAATCCCAACTCT            |
| co3_968127<br>5_x2 | CM000671.2/64<br>046744-<br>64046678   | 21 | #####  | 26.3 | 2 | GGTAAAATGACTGAGTAGGGCATTAGACTGTACATCTAAAAA<br>CAGAGGTCAAGGCCTGTTTTTACCA        |
| co3_972240<br>9_x2 | CM000673.2/63<br>489530-<br>63489598   | 18 | #####  | 36.2 | 2 | ATTAAGGTAGTATAGTAGAGTAAATACTTCGAAGCCAAAAGA<br>TCTAGGTTTGAATCCTAGCTTTCATG       |
| co3_972316<br>9_x2 | CM000685.2/10<br>2786742-<br>102786669 | 18 | #####  | 28.2 | 2 | TAGAATATAGTGTATCAGGTAGCACAAAGATTTTTGAATTCTT<br>AAGAGAGTAGGTTCAATTCCTATAATCCTGT |
| co3_973215<br>1_x2 | CM000685.2/25<br>262043-<br>25261972   | 14 | 0.003  | 28.2 | 2 | AGTCAAGTGGTTTTAGTGGAAAGAACATTGGATTGGAAGTCAA<br>GAGGCCTGGATTCTTGCTCCAGCTTCACCA  |
| co3_973574<br>1_x2 | CM000670.2/70<br>237343-<br>70237274   | 15 | 0.0005 | 30.2 | 2 | GGCAGTGTCTAGAGGTAAAGAGTACAGGCTTAGAGTCAGAC<br>AGCGCGGGTTCAAATCCTGCTTCTGCCA      |
| co3_983329<br>5_x2 | CM000670.2/88<br>133080-<br>88133007   | 14 | #####  | 28.2 | 2 | GGTACAGTGTTAAAGGGGAGAAAATTGCTGACTTTGAATAC<br>AGTAGACCTAGGTTTGAATCCTGGCTTTACCA  |

---

---

|                     |                                        |    |            |      |   |                                                                               |
|---------------------|----------------------------------------|----|------------|------|---|-------------------------------------------------------------------------------|
| co3_98714<br>83_x2  | CM000666.2/8<br>4855315-<br>84855245   | 14 | #####<br># | 28.2 | 2 | AATATAGTACTGAGTGATGAAGAGCCTGGCTTGGAATC<br>AGATAGATGTAGTTTTAAATTCTGTCTGTATTG   |
| co3_98776<br>29_x2  | CM000670.2/1<br>8537373-<br>18537307   | 13 | #####<br># | 26.3 | 2 | GGTAATATAGCTTAAGAGCCGTGGGTTTTGAACTCAGAT<br>TGCCTTGGTTCAAATCCGAGTTTTCATTT      |
| co3_99941<br>67_x2  | CM000672.2/4<br>7633857-<br>47633927   | 18 | #####<br># | 28.2 | 2 | GTTAATGTAGCTTAATTATTTAAAGCAAGGCACTGAAAA<br>TGCCTAGATGGGTCCGCACAACCCGGTAAACA   |
| co3_10040<br>725_x1 | CM000664.2/8<br>2819272-<br>82819338   | 17 | 9E-05      | 34.2 | 1 | GCCCTTGTAGTATAATTCAATACTCTGGTCTTGTAACC<br>AGAAATGGAGGATCTCCTCCCCAGGACA        |
| co3_10046<br>439_x1 | CM000665.2/1<br>66233278-<br>166233208 | 14 | #####<br># | 28.2 | 1 | GTTGATGTGGTTTAATATGTTAAAACAAGGCATTGAAAA<br>TGTCTAGATGAGTTCTCATAGCTCCATAAACA   |
| co3_10140<br>946_x1 | CM000668.2/2<br>6728053-<br>26728125   | 23 | #####<br># | 46.1 | 1 | GGGGAATTGGCTCAAGCGGTAGAGCGCTTGCTTAGCAT<br>GCAAGAGGTAGCAGGATCGACGCCTGCACTCTCCA |

---

**Table S3. The list of identified glycosylated snoRNA in paracancerous tissue (PCA) and cancer tissue (CA).** (a) N-linked glycosylated snoRNAs from PCA, (b) N-linked glycosylated snoRNAs from CA

(a)

| Qseqid             | Sseqid                         | NT | Evalue      | Bitscore | Number | Sequence                                                                                    |
|--------------------|--------------------------------|----|-------------|----------|--------|---------------------------------------------------------------------------------------------|
| ex3_16_03268_x2330 | ENST0000364281.1               | 14 | #####<br>## | 28.2     | 2330   | CTAAAACAATGTCAATAGTTTTTCATCAACAGCAGTTGAACCTAGTAAGTGTGCGATACTTT                              |
| ex3_16_07924_x2326 | CM000664.2/231456523-231456444 | 17 | #####<br>## | 34.2     | 2326   | TGGATATGATGACTGATTACCTGAGAAATAATTGATGAAATCTCAAGAAAATTCCTCTAGATAGTCAAGTTCTGATCCAG            |
| ex3_19_90113_x1412 | CM000673.2/62853395-62853325   | 20 | #####<br>## | 40.1     | 1412   | CTCACCAGTGATGAGTTGAATACCGCCCCAGTCTGATCAATGTGTGACTGAAAGGTA<br>TTTTCTGAGCTGTG                 |
| ex3_20_57856_x1303 | ENST0000627253.1               | 20 | #####<br>## | 40.1     | 1303   | AAGACTATACTTTTCAGGGATCATTCTATAGTTTGTTACTAGAGAAGTTTCTCTGAACGT                                |
| ex3_21_14424_x1214 | AY349606.1/1-85                | 15 | #####<br>## | 30.2     | 1214   | CCCCUAUCUCUCAUGAUGAACACAU AUGCCUCUGAGCUGCUGUGAUUUUCUGGCUU<br>CAAAGUAAACGCUCUGAAGAAGAGAUGGGG |
| ex3_21_78138_x1108 | AJ224028.1/3-79                | 28 | #####<br>## | 56       | 1108   | CAGAAUACAUGAUGAUCUCAAUCCAACUUGAACUCUCUCACUGAUUACUUGAUGAC<br>AAUAAAAUAUCUGAUUUCUG            |

|                           |                                                  |    |            |      |      |                                                                                                           |
|---------------------------|--------------------------------------------------|----|------------|------|------|-----------------------------------------------------------------------------------------------------------|
| ex3_22<br>45872_<br>x1006 | ENST0<br>000036<br>2607.1                        | 26 | ####<br>## | 52   | 1006 | CTGCATCCACTGATAGACCTTGAACAATTTACTGTTGTTCTTTTGGTTTGCCTAGGA<br>TG                                           |
| ex3_23<br>19852_<br>x914  | CM000<br>663.2/7<br>578707<br>2-<br>757871<br>50 | 14 | ####<br>## | 28.2 | 914  | GGTCAATGATGAGTTGGCATGTATTCTGAATCTAAAGTTGATTATTACTACTTTAGCTC<br>TAGAATTACTCTGAGACCTG                       |
| ex3_23<br>32579_<br>x902  | ENST0<br>000058<br>0533.1                        | 30 | ####<br>## | 60   | 902  | AAGACTATACTTTCAGGGATCATTCTATAGTGTGTTACTAGAGAAGTTTCTCTGAAC<br>GT                                           |
| ex3_24<br>01130_<br>x832  | CM000<br>672.2/8<br>906113<br>1-<br>890610<br>31 | 14 | ####<br>## | 28.2 | 832  | ATTCTTTTGTATCTCACAAGTGTGACTGGGTTTTTAGGCTCATGTGTGAGATGAGCTT<br>CCCTCAAAAATTGTTGTGACTGTGGCATGTTACCTGTGTGATG |
| ex3_24<br>10212_<br>x819  | ENST0<br>000038<br>4048.1                        | 16 | ####<br>## | 32.2 | 819  | ATTCGTGATGACTGATCATTCTTCACTTTGACCAGATGTCTACTGAAGAAAGCCTGC<br>GT                                           |
| ex3_24<br>68755_<br>x767  | ENST0<br>000038<br>4320.2                        | 14 | ####<br>## | 28.2 | 767  | CTGGTTGCATGATGAATAAAATCAAATCACCATCTTTCGGCTGAGTTCGTGATGGATT<br>TG                                          |
| ex3_25<br>97573_<br>x661  | AB061<br>820.1/3<br>401-<br>3472                 | 28 | ####<br>## | 56   | 661  | UCAAAAUGAUGAGAUUCCACUUAUUUGGUCCGUGUUUCUGAAACACAUGAUUUU<br>GUGGAAAUUCUGACUUG                               |
| ex3_26<br>11343_<br>x649  | ENST0<br>000044<br>8188.1                        | 29 | ####<br>## | 58   | 649  | TGGAGGTGATGAACTGTCTGAGCCTGACCTTGTAGAATGGAGGCCAAAAAACTGATT<br>TAA                                          |
| ex3_27<br>44568_<br>x548  | AJ5433<br>25.1/2-<br>85                          | 28 | ####<br>## | 56   | 548  | CUGAGUCCAUGAUGAUUUCAAGUUAUCCUGUCUGAAGGCAAAGAAAGGCCUUUC<br>UGUGUGGAAUUUGAAUAUCUGAAACUCAG                   |

|                          |                                      |    |            |      |     |                                                                                                                                                                                                                                                       |
|--------------------------|--------------------------------------|----|------------|------|-----|-------------------------------------------------------------------------------------------------------------------------------------------------------------------------------------------------------------------------------------------------------|
| ex3_27<br>82515_<br>x524 | ENST0<br>000036<br>4155.1            | 45 | ####<br>## | 65.9 | 524 | GTTTCTGATGAAGCCTATGTTGGTAGGGACA<br>ACTAAGGTTGTTGATGAATGCTAACA<br>GCT                                                                                                                                                                                  |
| ex3_27<br>89313_<br>x520 | AC104<br>446.2/1<br>45501-<br>145577 | 35 | ####<br>## | 69.9 | 520 | AAUGUGAAGCAAUGAUGAUAAACUGGAUC<br>UGACUGACUGUGGCUGAGUCUGUUCA<br>AUCCAACCCUGAGCUUCAUGUU                                                                                                                                                                 |
| ex3_28<br>15960_<br>x505 | AK096<br>147.1/7<br>39-811           | 20 | ####<br>## | 40.1 | 505 | GUUUGAAUGAUGACUUUAAUUGUCGGAU<br>ACCCCUUCACUCCUUUUUAUGAGUGAAA<br>CAUAAGAGUCUGACAAAC                                                                                                                                                                    |
| ex3_28<br>51113_<br>x485 | AJ6094<br>83.1/2-<br>129             | 28 | 6E-11      | 56   | 485 | CUGGAGGACUAAGAAGGCUGAGUCUGAU<br>GAAGUAAGACUUUGCUGAUACAUCCU<br>CCUAGAAAAAAGGGUUGGAGAGAGCAGCC<br>UUCACUGAAGAGUAUCACAGGGCUGA<br>CUGUACUACCCAACACUC                                                                                                       |
| ex3_29<br>58900_<br>x429 | ENST0<br>000036<br>4921.1            | 19 | 0.002      | 30.2 | 429 | ATGCAGGTACTGTTATAACTGAAGTGTTTT<br>ACGGTTTTTTCTTCCTGCTTAAAGCACTT<br>G                                                                                                                                                                                  |
| ex3_29<br>73373_<br>x423 | AF020<br>531.1/1<br>04-320           | 24 | ####<br>## | 48.1 | 423 | AAGACUAUACUUUCAGGGAUCAUUUCUAU<br>AGUGUGUUACUAGAGAAGUUUCUCUG<br>AACGUGUAGAGCACCGAAAACCACGAGGA<br>AGAGAAGUAGCGUUUUCUCCUGAGCG<br>UGAAGCCGGCUUUCUGGCGUUGCUUGGC<br>UGUAACUGCCGUCAGCCAUUGAUGAU<br>CGUUCUUCUCCCCGUAUUGGGGAGUGAG<br>AGGGAGAGAACGCGGUCUGAGUGGU |

|                          |                                                  |    |            |      |     |                                                                                                                                                                                                                                                              |
|--------------------------|--------------------------------------------------|----|------------|------|-----|--------------------------------------------------------------------------------------------------------------------------------------------------------------------------------------------------------------------------------------------------------------|
| ex3_30<br>29161_<br>x397 | AC092<br>174.5/1<br>56814-<br>156683             | 23 | ####<br>## | 46.1 | 397 | CUUCCCAUUUAAUUUGCUGCUUAAUAGUCUCACUGUGAUUAGAGCAAUUUAUACACAU<br>GGGAUAAAAUAAUUAUUGAGCCACUGUAAAUUGAGAUGAAGUAACCGUUUUUCAUUAU<br>CUUCUGCAUGGACUAGACAUUG                                                                                                           |
| ex3_30<br>76021_<br>x377 | CM000<br>673.2/6<br>285373<br>2-<br>628536<br>63 | 24 | ####<br>## | 48.1 | 377 | GTTTGTGATGACTTACATGGAATCTCGTTCGGCTGATGACTTGCTGTTGAGACTCTGA<br>AATCTGATTTTC                                                                                                                                                                                   |
| ex3_31<br>21870_<br>x356 | CM000<br>679.2/1<br>911263<br>6-<br>191124<br>20 | 30 | ####<br>## | 60   | 356 | AAGGCTATACTTTTCAGGGATCATTCTATAGTGTGTTACTAGAGAAGTTTCTTTGAAC<br>GTGTAGAGCACCGAAAACCCCGAGGAAGAGAGGTAGCGTTTTCTCCTGAGCGTGAA<br>GCCGGCTTTCTGGCGTTGCTTGGCTGCAACTGCCGTCAGCCATTGATGATCGTTCTT<br>CTCTCCGTATTGGGGAGTGAGAGGGGAGAGAACGCGGTCTGAGTGGT                       |
| ex3_32<br>02744_<br>x322 | CM000<br>682.2/1<br>796294<br>6-<br>179627<br>10 | 29 | ####<br>## | 58   | 322 | GTGAAATGATGATTCAGTTTATCCATTCGCTGAGTGCGCTGCACTGACCTTCTTCCAA<br>GCCTCAGTTCCTGTTCTAGGAACTTGAGGCTATGTAGCCTGAAAATGCCCTGCAGTC<br>TGCAGTGTTCTACTGTGAACTGCTTGTGTGTTGGCAGGCTACCGGTAAGAATGGTTG<br>GTGTCAGCAGGGACGGGGCCCTCTGAGACCCATCTCACAAGATGAGTGGTGAAAA<br>TCTGATCAC |

|                          |                                                    |    |            |      |     |                                                                                                                                                |
|--------------------------|----------------------------------------------------|----|------------|------|-----|------------------------------------------------------------------------------------------------------------------------------------------------|
| ex3_32<br>18399_<br>x317 | CM000<br>668.2/8<br>567736<br>8-<br>856772<br>94   | 25 | ####<br>## | 50.1 | 317 | TATCTGTGATGATCTTATCCCGAACCTGAACTTCTGTTGAAAAAAAAAACTTTTACG<br>GATCTGGCTTCTGAGAT                                                                 |
| ex3_32<br>38119_<br>x309 | ENST0<br>000045<br>9342.1                          | 24 | 1E-08      | 48.1 | 309 | G TTCAGATGATGAATTTAACTGTTCAACTGCTGAATGATAACGGGCATGAACTAAAAC<br>TT                                                                              |
| ex3_32<br>63969_<br>x300 | CM000<br>685.2/1<br>197874<br>84-<br>119787<br>353 | 23 | ####<br>## | 46.1 | 300 | AAAGCAGGTTGCAATTACAGTGCTTCATTTTGTGGAAGTACTGCCATTATCCTGCTGA<br>AAGAAAAGCCGTGTTAATCATTTTTGATTTTGCCTTTATGAGGGTAAAATCATGACAG<br>ATTGACATGGACAATT   |
| ex3_32<br>65168_<br>x299 | ENST0<br>000039<br>1079.1                          | 14 | ####<br>## | 28.2 | 299 | AAATGATGAAATCACCCAAAATAGCTGGAATTACCGGCAGATTGTGTAGTGGTGAAC<br>CTA                                                                               |
| ex3_32<br>98669_<br>x289 | AADC0<br>110290<br>1.1/154<br>89-<br>15356         | 19 | ####<br>## | 38.2 | 289 | CUGUCAGGUGGGUAUACCCUUCUCCUGUUCUCCGUUUGGAGGGCAGAUAGAACA<br>UGAUGACUGGAGAUGCAUGAAAUGUGACUAAUGUCUCUGUGUAAUCAGGACUUGC<br>AACACCCUGAUUGCUCCUAUCUGAU |
| ex3_33<br>43463_<br>x272 | CM000<br>663.2/4<br>477649<br>0-<br>447765<br>93   | 26 | ####<br>## | 52   | 272 | AAGTAGGGTGATGAAAAAGAATCCTTAGGGCGTGGTTGTGGCCGTCTTGGTCACCTGT<br>GTGCCACTTGCCAATGCAAGGACTTGTCATAGTTACACTGACTGTTG                                  |

|                          |                                                  |    |            |      |     |                                                                                                                                                      |
|--------------------------|--------------------------------------------------|----|------------|------|-----|------------------------------------------------------------------------------------------------------------------------------------------------------|
| ex3_34<br>25819_<br>x247 | CM000<br>667.2/5<br>807018<br>8-<br>580702<br>91 | 17 | ####<br>## | 34.2 | 247 | ATCCTTTTGTAGTTTACGAGCATGATGATTGAGTGTTACACACACGGATGTGATATGTG<br>CCACCCTCAAACCTTGTTACGACTTCAGCTTATTACCCAAGTACC                                         |
| ex3_34<br>41946_<br>x242 | AJ2388<br>53.1/1-<br>62                          | 25 | ####<br>## | 50.1 | 242 | CACAGAUGAUGAACUUAUUGACGGGCGGACAGAAACUGUGUGCUGAUUGUCACGU<br>UCUGAUU                                                                                   |
| ex3_34<br>66325_<br>x236 | AP001<br>273.4/3<br>902-<br>3830                 | 35 | ####<br>## | 69.9 | 236 | CGAUGUUAUGAUGAUGGGCGAAAUGUUAACUGCUCUGAAGGGGCUGAAUGAAAA<br>UGGCCUUUCUGAACAUCC                                                                         |
| ex3_34<br>74528_<br>x233 | AJ6094<br>88.1/1-<br>73                          | 21 | ####<br>## | 42.1 | 233 | GUUCAGAUGAUGAAUUUAACUGUUAACUGCUGAAUGAUAAACGGGCAUGAACUAA<br>AACUUAAUUCUGACAGAG                                                                        |
| ex3_34<br>81725_<br>x231 | CM000<br>674.2/5<br>664375<br>0-<br>566436<br>80 | 24 | ####<br>## | 48.1 | 231 | CCTCACTGATGAGTACGTTCTGACTTTCGTTCTTCTGAGTTTGCTGAAGCCAGATGCA<br>ATTTCTGAGAAGG                                                                          |
| ex3_35<br>37711_<br>x213 | ENST0<br>000062<br>9536.1                        | 26 | ####<br>## | 52   | 213 | AAGCACTGCCTTTGAACCTGATGTGTCTTGTTTGTAGCTTCACGGGCCAAGCAACAG<br>TGC                                                                                     |
| ex3_35<br>49990_<br>x209 | AK303<br>222.1/6<br>47-788                       | 21 | ####<br>## | 42.1 | 209 | GCUCUGUGAUGGAGCCCAUGCGUGUCAUCUGAGCCUCUGGCUUCCUGCCAGUG<br>CAGCCCUGGCAGUGUCCUACUUCCAGGGCUGUUGUCUGCCUGGCGGGAAGGUC<br>CUGGGCAAAGGAUCAGUCUUUGUACUCUGAGAGC |
| ex3_35<br>62651_<br>x206 | ENST0<br>000038<br>4147.1                        | 35 | ####<br>## | 69.9 | 206 | CTACGGGGATGATTTTACGAACTGAACTCTCTTTTCTGATGGATTAGTGGAGAAAAC<br>AG                                                                                      |

|                          |                                                    |    |            |      |     |                                                                                                                                                    |
|--------------------------|----------------------------------------------------|----|------------|------|-----|----------------------------------------------------------------------------------------------------------------------------------------------------|
| ex3_35<br>95851_<br>x197 | CM000<br>665.2/1<br>854422<br>19-<br>185442<br>319 | 15 | ####<br>## | 30.2 | 197 | ATTCTTTTGTGATTCATAAGCATGACTGGGTGTTCCCCTCACGGGTGAGATGTGCC<br>TCCCTCCAACCTTGTACGACGTCACCACATTACCTGTCTGACA                                            |
| ex3_36<br>24250_<br>x190 | AB061<br>820.1/2<br>178-<br>2249                   | 28 | ####<br>## | 56   | 190 | CAGUAGUGAUGAAAUCCACUUCAUUGGUCCGUGUUUCUGAACCACAUGAUUUUC<br>UCGGAUGUUCUGAUGCU                                                                        |
| ex3_36<br>30119_<br>x189 | AC006<br>597.2/8<br>154-<br>8065                   | 14 | ####<br>## | 28.2 | 189 | UCACUGUGAUGAUGGUUUUCCAACAUUCGCAGUUUCCACCAGAAAGGUUUUCCUU<br>AGUGUUGGGUAAACCUUCCUUGGAUGUCUGAGUGA                                                     |
| ex3_36<br>34440_<br>x187 | AJ0106<br>66.1/3-<br>73                            | 20 | ####<br>## | 40.1 | 187 | AGCACAAAUGAUGAAUAACAAAGGGACUUAUACUGAAACCAGAUGUUACAUUGUA<br>GUGUGCUGAUGUGCU                                                                         |
| ex3_36<br>36497_<br>x187 | AJ6094<br>30.1/1-<br>139                           | 29 | ####<br>## | 58   | 187 | GACCUCCUGGGAUCGCAUCUGGAGAGUGCCUAGUAUUCUGCCAGCUUCGGAAAG<br>GGAGGGAAAGCAAGCCUGGCAGAGGCACCCAUUCCAUCCCAGCUUGCUCGGUA<br>GCUGGCGAUUGGAAGACACUCUGCGACAGUG |
| ex3_37<br>04649_<br>x171 | AJ6094<br>50.1/1-<br>137                           | 29 | ####<br>## | 58   | 171 | GGGCAUACUCGUAGACCUUGCCUGACUGUGUCUCAUGUCCAGGCAGGGGGGACAG<br>UGUAUGCAAGAAUAAUUGGAGUUCUGCCAGCUCUAACCAGCUUCAUCAGUGGC<br>UGGAUAAAUUGCAGGACUCUAAACAUUU   |
| ex3_37<br>17530_<br>x168 | ENST0<br>000040<br>8061.1                          | 31 | ####<br>## | 61.9 | 168 | GGGCTCCCATGATGTCCAGCACTGGGCTCTGATCACCCCTGAGGACACAGTGCACC<br>CCAG                                                                                   |

|                          |                                                  |    |            |      |     |                                                                                                                                                                                                                         |
|--------------------------|--------------------------------------------------|----|------------|------|-----|-------------------------------------------------------------------------------------------------------------------------------------------------------------------------------------------------------------------------|
| ex3_37<br>21212_<br>x167 | ENST0<br>000036<br>3836.1                        | 14 | ####<br>## | 28.2 | 167 | GGTCAATGATGTAATGGCATGTATTAGCTGAATCCAGAGTTGATATGAGTTCTAAAAT<br>TA                                                                                                                                                        |
| ex3_37<br>29173_<br>x165 | CM000<br>679.2/8<br>173587<br>-<br>817345<br>4   | 20 | ####<br>## | 40.1 | 165 | TCGTCAGGTGGGATAATCCTTACCTGTTCTCCTCCGGAGGGCAGATTAGAACATGA<br>TGATTGGAGATGCATGAAACGTGATTAACGTCTCTGCGTAATCAGGACTTGCAACAC<br>CCTGATTGCTCCTGTCTGAT                                                                           |
| ex3_37<br>30159_<br>x164 | AC025<br>362.12/<br>104594<br>-<br>104663        | 40 | ####<br>## | 79.8 | 164 | GCUGUGAUGACAUUCCAAUUAAGCACGUGUUAGACUGCUGACGCGGGUGAUGC<br>GAACUGGAGUCUGAGC                                                                                                                                               |
| ex3_37<br>43959_<br>x161 | ENST0<br>000036<br>3981.1                        | 21 | ####<br>## | 42.1 | 161 | ACTCCATGATGAACACAAAATGACAAGCATATGGCTGAACTTTCAAGTGATGTCATCT<br>TA                                                                                                                                                        |
| ex3_37<br>60941_<br>x157 | CM000<br>663.2/2<br>850855<br>9-<br>285087<br>62 | 24 | ####<br>## | 48.1 | 157 | CCAACGTGGATACCCTGGGAGGTCACTCTCCCCAGGCTCTGTCCAAGTGGCATAGG<br>GGAGCTTAGGGCTCTGCCCATGATGTACAGTCCCTTTCCACAACGTTGAAGATGAA<br>GCTGGGCCTCGTGTCTGCGCCTGCATATTCCTACAGCTTCCCAGAGTCCTGTGGAC<br>AATGACTGGGGAGACAAACCATGCAGGAAACATAT |
| ex3_37<br>87417_<br>x151 | AB061<br>820.1/4<br>174-<br>4242                 | 27 | ####<br>## | 54   | 151 | UUGUUAUGAUGAGAUUCCACUUAAGGUCCGUGUUUCUGAAACAAAUGAUUUUGUG<br>GAAGUUCUGAUUUA                                                                                                                                               |
| ex3_37<br>90585_<br>x150 | ENST0<br>000040<br>8493.2                        | 23 | ####<br>## | 46.1 | 150 | ACCTTCTTGATAAGCACTGTGCTAAAATTGCAGACACTAGGACCATGTCTTGGTTTT<br>TG                                                                                                                                                         |

|                          |                                                  |    |            |      |     |                                                                                                                                                                                                                                    |
|--------------------------|--------------------------------------------------|----|------------|------|-----|------------------------------------------------------------------------------------------------------------------------------------------------------------------------------------------------------------------------------------|
| ex3_37<br>92235_<br>x150 | ENST0<br>000036<br>4805.1                        | 14 | ####<br>## | 28.2 | 150 | GAGGTCAGTGATGAGCAACATTCACCATCTTTCGTTTGAGTCTCACGGCCATGAGAT<br>CAA                                                                                                                                                                   |
| ex3_38<br>02049_<br>x147 | AC117<br>503.8/2<br>09801-<br>209669             | 25 | ####<br>## | 50.1 | 147 | UAGCAAGCCUCCAGCGUGCUUGGGUCUGCAGUGACCCCGUGGAUCCUACAGGG<br>CUUGCCAGAACAGUUUUGAAAUGGUUUGAGGCCUUGCCGUGCUCCAUGUAGAGC<br>AAGGUUAUAGAAUUUCAGACAAUG                                                                                        |
| ex3_38<br>32570_<br>x141 | AC093<br>484.2/1<br>60294-<br>160365             | 23 | ####<br>## | 46.1 | 141 | UGUCCUGAUGAUACUUGUAAUAGGAAGUGCCGUCAGAAGCGAUAACUGACGACGU<br>CUAAUGUCUAUCUGACC                                                                                                                                                       |
| ex3_38<br>52233_<br>x138 | ENST0<br>000051<br>6404.1                        | 19 | ####<br>## | 38.2 | 138 | TCCAGCTGTAGGCAGCTGCCTAGGTTGTCTTGTACCTAGGCAAGTGTTACACTGCTG<br>GGA                                                                                                                                                                   |
| ex3_38<br>61227_<br>x135 | ENST0<br>000036<br>4722.1                        | 29 | 2E-11      | 58   | 135 | GATCAATGATGAAACTAGCCAAATCTGAGCATCAGAAGGCTTTCGGTCTACCTGAT<br>GCA                                                                                                                                                                    |
| ex3_38<br>67822_<br>x134 | CM000<br>679.2/1<br>918801<br>6-<br>191882<br>32 | 34 | 2E-14      | 67.9 | 134 | AAGACTATACTTTCAGGGATCATTCTATAGTGTGTTACTAGAGAAGTTTCTCTGAAC<br>GTGTAGAGCACCGAAAACACGAGGAAGAGAGGTAGCGTTTTCTCCTGAGCGTGAA<br>GCCGGCTTCTGGCGTTGCTTGGCTGCAACTGCCGTCAGCCATTGATGATCGTTCTT<br>CTCTCCGTATTGGGGAGTGAGAGGGAGAGAACGCCGTCTGAGTGGT |
| ex3_38<br>68626_<br>x134 | ENST0<br>000062<br>5943.1                        | 23 | ####<br>## | 46.1 | 134 | TCTCAGTGATGAAAACCTTGTCCAGTTCTGCTACTGACAGTAAGTGAAGATAAAGTGT<br>GT                                                                                                                                                                   |

|                          |                                                    |    |            |      |     |                                                                                                                                                  |
|--------------------------|----------------------------------------------------|----|------------|------|-----|--------------------------------------------------------------------------------------------------------------------------------------------------|
| ex3_38<br>69832_<br>x134 | AY349<br>593.1/1<br>-137                           | 32 | ####<br>## | 63.9 | 134 | CAGGCUGUGAUGAUUGGCAGGGGUACGGACCUCAGCUGAGUCAUGGGAGCUG<br>AAUGUAUGUGUUUCUCCUUUGUCCUGCAUGUGGCAGGCUGAUGGGGAGCACUUA<br>CAUGAGACUGUUGCCUCAAUUCUGAGCCUG |
| ex3_38<br>73031_<br>x133 | AY349<br>604.1/4<br>-89                            | 41 | ####<br>## | 81.8 | 133 | UCUGGCAAUGAUGACCCACUUGCCCUCACUGAGAACAAGUUCGGUAAUGAGAAU<br>CUUUGUUAUGGACUCAAGUUCUGAGCCAGC                                                         |
| ex3_38<br>79510_<br>x131 | CM000<br>664.2/2<br>061618<br>78-<br>206161<br>956 | 22 | ####<br>## | 44.1 | 131 | CTGGTTGCATGATGAATAAAATCAAATCACCATCTTTTCGGCTGAGTTCGTGATGGATT<br>TGCTTTTTCTGATTAAGCCA                                                              |
| ex3_39<br>03542_<br>x127 | ENST0<br>000058<br>3861.1                          | 23 | ####<br>## | 46.1 | 127 | CACAGATGATGAACTTATTGACGGGCGGACAGAACTGTGTGCTGATTGTCACGTTC<br>TGA                                                                                  |
| ex3_39<br>10624_<br>x126 | ENST0<br>000045<br>9163.1                          | 51 | ####<br>## | 85.7 | 126 | AAGTGAAATGATGGCAATCATCTTTTCGGGACTGACCTGAAATGAAGAGAATACTCATT<br>GC                                                                                |
| ex3_39<br>11632_<br>x126 | ENST0<br>000038<br>4229.1                          | 51 | ####<br>## | 46.1 | 126 | TGCTCTGATGAAATCACTAATAGGAAGTGCCGTCAGAAGCGATAACTGACGAAGACT<br>ACT                                                                                 |
| ex3_39<br>18628_<br>x124 | ENST0<br>000036<br>3214.1                          | 41 | ####<br>## | 65.9 | 124 | TGATGACATTCTCCGGAATCGCTGTACGGCCTTGATGAAAGCACATTTGAACCCTTTT<br>CC                                                                                 |

|                          |                                                  |    |            |      |     |                                                                                                                                                                                                                                       |
|--------------------------|--------------------------------------------------|----|------------|------|-----|---------------------------------------------------------------------------------------------------------------------------------------------------------------------------------------------------------------------------------------|
| ex3_39<br>19000_<br>x124 | AL449<br>212.1/1<br>7376-<br>17238               | 23 | ####<br>## | 46.1 | 124 | GACCUCCUGGGAUCGCAUCUGGAGACUGCCUAGUAUUCUGCCAGCUUCGGAAAG<br>GGAGGGAAAGCAAGCCUGGCAGAGGCACCCAUUCCAUUCCCAGCUUGCUCGGUA<br>GCUGGUGAUUGGAAGACACUCUGCGACAGUG                                                                                   |
| ex3_39<br>22844_<br>x123 | CM000<br>679.2/1<br>919024<br>5-<br>191900<br>29 | 23 | ####<br>## | 46.1 | 123 | AAGACTATACTTTTCAGGGATCATTCTATAGTGTGTTACTAGAGAAGTTTCTCTGAAC<br>GTGTAGAGCACCGAAAACCACGAGGAAGAGAGGTAGCGTTTTCTCCTGAACGTGAA<br>GCCGGCTTTCTGGCGTTGCTTGGCTGCAACTGCCGTCAGCCATTGATGATCGTTCTT<br>CTCTCCGTATTGGGGAGTGAGAGGGAGAGAACGCGGTCTGAGTGGT |
| ex3_39<br>32654_<br>x122 | CM000<br>682.2/2<br>656939<br>-<br>265701<br>0   | 17 | ####<br>## | 34.2 | 122 | TGGAGGTGATGAACTGTCTGAGCCTGACCTTGTAGAATGGAGGCCAAAAAACTGATT<br>TAATGAGCCTGATCC                                                                                                                                                          |
| ex3_39<br>43630_<br>x120 | CM000<br>672.2/6<br>875517<br>2-<br>687552<br>38 | 28 | ####<br>## | 56   | 120 | GAGTTATGATGTGTGTAATCCTATTCCATTGCTGAAATGCAGTGTGGAACACAATGA<br>ACTGAACTC                                                                                                                                                                |

|                          |                                                  |    |            |      |     |                                                                                                                                                                                                                                      |
|--------------------------|--------------------------------------------------|----|------------|------|-----|--------------------------------------------------------------------------------------------------------------------------------------------------------------------------------------------------------------------------------------|
| ex3_39<br>45182_<br>x119 | CM000<br>685.2/7<br>084629<br>5-<br>708460<br>80 | 15 | ####<br>## | 30.2 | 119 | AAGACTATACTTTTCAGGGATCATTTCTATAGTTTGTTACTAGAGAAGTTTCTCTGAACG<br>TGTATAGCACTGAAAACCACAAAGAAGAGGTGCAGCATTATCTCCTAAGTGTAAGC<br>CGGCTCTTGATGTTGCTTTGCTGCAACTGCCATTTGCCATTGATGATCGTTCTTTTCT<br>TCCTTTGGGAGACTGGGAAGGAAAGGATGCAATCTGAGTGGT |
| ex3_39<br>51830_<br>x118 | ENST0<br>000038<br>4214.1                        | 32 | ####<br>## | 63.9 | 118 | CTTCGATGAAGAGATGATGACGAGTCTGACTTGGGGATGTTCTCTTTGCCAGGTGG<br>CCT                                                                                                                                                                      |
| ex3_39<br>65257_<br>x116 | ENST0<br>000036<br>4938.1                        | 43 | ####<br>## | 85.7 | 116 | CCAACGTGGATACACCCGGGAGGTCACTCTCCCCGGGCTCTGTCCAAGTGCGTAG<br>GGGA                                                                                                                                                                      |
| ex3_39<br>91858_<br>x111 | ENST0<br>000038<br>4769.1                        | 33 | ####<br>## | 50.1 | 111 | AGCTTAATGATGACTGTTTTTTTTGATTGCTTGAAGCAATGTGAAAAACACATTTACC<br>G                                                                                                                                                                      |
| ex3_39<br>99465_<br>x110 | ENST0<br>000051<br>6236.1                        | 20 | ####<br>## | 40.1 | 110 | ATGGAGGCTGCAGTGAGCAGAGATGGCGCCACTGCACTCCAGCCTGAGCGACAAC<br>GAGAC                                                                                                                                                                     |
| ex3_40<br>04167_<br>x109 | ENST0<br>000038<br>4176.1                        | 24 | ####<br>## | 48.1 | 109 | CTCCATGTATCTTTGGGACCTGTCAAGTGTGGCAGTCTCCCTTCTTGCCATGGAAG<br>AGC                                                                                                                                                                      |
| ex3_40<br>05257_<br>x109 | AC007<br>066.4/1<br>64516-<br>164622             | 34 | ####<br>## | 67.9 | 109 | AAGUUUUCUAAGUGUCUAAUGAUGAAUUUCAUAGGGCAGAUUCUGAGGUGAAAAU<br>UUAAUUCAUACUGAUACUCCUACUGUGGAAUCUGAAGACACUUGAAAACGU                                                                                                                       |
| ex3_40<br>32731_<br>x104 | ENST0<br>000038<br>4027.1                        | 37 | ####<br>## | 58   | 104 | GTTTGAATGATGACTTTAATTGTCGGATACCCCTTCACTCCTTTTATGAGTGAAACATA<br>A                                                                                                                                                                     |

|                          |                                                  |    |            |      |     |                                                                                                                                                                                                                                      |
|--------------------------|--------------------------------------------------|----|------------|------|-----|--------------------------------------------------------------------------------------------------------------------------------------------------------------------------------------------------------------------------------------|
| ex3_40<br>38295_<br>x103 | AC104<br>066.3/5<br>1055-<br>51176               | 25 | ####<br>## | 50.1 | 103 | GUGCCCUUUUAAGGUUGACCCAGUGCUUUUAAGAGGCCUAACACAGAAGGGUAAAGU<br>AAGUCUCCAUA AAAACCCAGAGAAGAGACUGGAAAGCUCCUCUUUGGAUCCUGUCU<br>GGAGUCACAACU                                                                                               |
| ex3_40<br>57732_<br>x100 | ENST0<br>000038<br>4220.1                        | 20 | ####<br>## | 40.1 | 100 | CTTCCCATTTATTTGCTGCTTATAGTCTCACTGTGATATGAGCAATTATACACATGGG<br>AT                                                                                                                                                                     |
| ex3_40<br>95189_<br>x93  | ENST0<br>000058<br>3032.1                        | 29 | ####<br>## | 58   | 93  | AGTGATGATGACCCCAGGTA ACTCTGAGTGTGTGCTGATGCCATCACCGCAGCGC<br>TCTG                                                                                                                                                                     |
| ex3_41<br>09281_<br>x91  | ENST0<br>000057<br>9879.1                        | 47 | ####<br>## | 54   | 91  | GGGGCGGTGATGACCCCAACATGCCATCTGAGTGTGCGGTGCTGAAATCCAGAGGCT<br>GTTT                                                                                                                                                                    |
| ex3_41<br>30956_<br>x88  | AC008<br>443.10/<br>63918-<br>63851              | 28 | ####<br>## | 56   | 88  | GGGGCGGUGAUGACCCCAACAUGCCAUCUGAGUGUCGGUGCUGAAAUCCAGAGG<br>CUGUUUCUGAGCUG                                                                                                                                                             |
| ex3_41<br>39376_<br>x87  | CM000<br>679.2/4<br>838258<br>6-<br>483823<br>71 | 18 | ####<br>## | 28.2 | 87  | AAGACTATACTTT CAGGGATCATTCTATAGTTAGTTGCTAGAGAAGTTTCTCTGGAC<br>ATGTGGAGCACCCAGAAACCATGAGAAGGAGATGTAGTGTTCTCTCCGGAGCATGAA<br>GCTGGCTCTTGTTGTTGCTTCGCTGCACCTGCCATTTGCCATTGACAATCATTCTTCT<br>CTTCTCTGGGAGAGTAAGGAGGAGAGGACACAGTCTGAGTGGT |
| ex3_41<br>48537_<br>x86  | AB061<br>837.1/2<br>430-<br>2563                 | 28 | ####<br>## | 56   | 86  | UGGUCCAUCCUAAUCCUGCCGGUCCAUCUGUGGCCUGCCAGGUUUCGCUUGUG<br>GACCAGAGCACCCUAGAAGCCUCACCCGAGGAGUGAGCAGGGCUCCAGUGGGCU<br>CACGUCAUGGGCACUUCUAGACACUC                                                                                        |

|                         |                                                    |    |            |      |    |                                                                                                                                                                                                                                                                       |
|-------------------------|----------------------------------------------------|----|------------|------|----|-----------------------------------------------------------------------------------------------------------------------------------------------------------------------------------------------------------------------------------------------------------------------|
| ex3_41<br>52729_<br>x85 | CM000<br>663.2/1<br>738644<br>45-<br>173864<br>369 | 23 | ####<br>## | 46.1 | 85 | AACCAATGATGTAATGATTCTGCCAAATGAAATATAATGATATCACTGTAAAACCGTTC<br>CATTTTGATTCTGAGGTT                                                                                                                                                                                     |
| ex3_41<br>54344_<br>x85 | ENST0<br>000038<br>4584.1                          | 29 | ####<br>## | 58   | 85 | CAGCATGTTTCCAAGGGCTGTGGCTGGTCATAGCCATGGGATCTCCAAGTGCATGCA<br>AGA                                                                                                                                                                                                      |
| ex3_41<br>75367_<br>x82 | ENST0<br>000038<br>3875.1                          | 46 | ####<br>## | 83.8 | 82 | CTGCAGTGATGACTTTCTTAGGACACCTTTGGATTACCGTGAAAATTAATAAATTCT<br>GA                                                                                                                                                                                                       |
| ex3_42<br>10891_<br>x77 | AC013<br>283.23/<br>46245-<br>46493                | 38 | ####<br>## | 75.8 | 77 | AACAUGCUUCCUUAGAUCACCCUUUGUGGAUGAAUCUUGAACUGAGUUCCACUUG<br>UAAACUUCUUGUUUCUUGUGGUUCCAGUAGUCAAGAAACAUCAGCAACUUUUU<br>UGGUUGUAUAGUCAAGGUGCUUGAGUCAUUGGCAUGUAAGAGAAAUUACCUGC<br>AUGUUAGUCUACGUUCUGAUAGAAUAGACAUUGCAUUUAUGCUGCCAUUUGUUAC<br>UAUCAGGACUCGACUCGUGUGCGGACAUU |
| ex3_42<br>13894_<br>x77 | ENST0<br>000036<br>3484.1                          | 20 | ####<br>## | 40.1 | 77 | ACCTGTATTCGAAAGTGATCGTGGGCTGCCTGTGCCCTGGTCATTGATAGTGCAGG<br>GAGA                                                                                                                                                                                                      |

|                         |                          |    |       |    |    |                                                                                                                                                                                                                                                                                                                                                                                                                                                         |
|-------------------------|--------------------------|----|-------|----|----|---------------------------------------------------------------------------------------------------------------------------------------------------------------------------------------------------------------------------------------------------------------------------------------------------------------------------------------------------------------------------------------------------------------------------------------------------------|
| ex3_42<br>17282_<br>x77 | BK005<br>568.1/1<br>-420 | 28 | 6E-11 | 56 | 77 | GUUUUAGGGAGGGAGAGCGGCCUGGGUCCUGGGUGUUGUGUGCGGAGCUGUGG<br>CGUCGCGUGUGAGGCGCGUGCAGGGUGAGUGAGUGGACGCGUGAGUGUGUG<br>AGUGUGCGCGCUUGGAGCGUGUUAGGCGAGUGCGUGCGCCACCCUGCGCCCC<br>UCCUCCCGCUUACACUUUGAUCUUUUUGAUCGGAUCGUGACCCAGCCCCGCCG<br>GGCCGACCCGAAAUGAAAAGCUCUCCUCCUGCGAAGCCCCUCGGGGCGCUGUG<br>CAGCGAGGCCCUUAGGCGGCGGCCACGCUGUGGUCCCCGAGGUCCCCGAGCUG<br>GCCUUGCGGGGCCCGGCGCUCAGAAGUGAUGAAUUGAUCAGAUAGACGAGGCCG<br>GGCUUGUCCCCGCCACUGAUUAUCGAGGCGAUUCUGAUCUGG |
|-------------------------|--------------------------|----|-------|----|----|---------------------------------------------------------------------------------------------------------------------------------------------------------------------------------------------------------------------------------------------------------------------------------------------------------------------------------------------------------------------------------------------------------------------------------------------------------|

|                         |                                                  |    |            |      |    |                                                                    |
|-------------------------|--------------------------------------------------|----|------------|------|----|--------------------------------------------------------------------|
| ex3_42<br>23227_<br>x76 | CM000<br>668.2/3<br>183526<br>3-<br>318353<br>26 | 33 | ####<br>## | 65.9 | 76 | AGTGATGATGACCCAGGTAACCTTGAGTGTGTCGCTGATGCCATCACCGCAGCG<br>CTCTGACC |
|-------------------------|--------------------------------------------------|----|------------|------|----|--------------------------------------------------------------------|

|                         |                                                  |    |            |      |    |                                                                                 |
|-------------------------|--------------------------------------------------|----|------------|------|----|---------------------------------------------------------------------------------|
| ex3_42<br>33396_<br>x75 | CM000<br>665.2/5<br>269137<br>8-<br>526914<br>53 | 33 | ####<br>## | 65.9 | 75 | AAGAAATGAAGAACTAAAATTGGTCTTAGTATTGAAGTGAAGACACTGAGATCCAAC<br>TCTGATCTTGCCCTAAAC |
|-------------------------|--------------------------------------------------|----|------------|------|----|---------------------------------------------------------------------------------|

|                         |                           |    |            |    |    |                                                                 |
|-------------------------|---------------------------|----|------------|----|----|-----------------------------------------------------------------|
| ex3_42<br>72183_<br>x70 | ENST0<br>000038<br>4662.1 | 26 | ####<br>## | 52 | 70 | CTTCCCATTATTTGCTGCTTGTAGTCTCACAGTGATACGAGCAGTTATACGCATGGG<br>AT |
|-------------------------|---------------------------|----|------------|----|----|-----------------------------------------------------------------|

|                         |                                                    |    |            |      |    |                                                                                                               |
|-------------------------|----------------------------------------------------|----|------------|------|----|---------------------------------------------------------------------------------------------------------------|
| ex3_42<br>73998_<br>x69 | CM000<br>668.2/1<br>328168<br>02-<br>132816<br>877 | 28 | 6E-11      | 56   | 69 | GCTGTACATGATGACAACCTGGCTCCCTCTACTGAACTGCCATGAGGAACTGCCATG<br>TCACCCTTCTGATTACAGC                              |
| ex3_42<br>88263_<br>x68 | ENST0<br>000036<br>3217.1                          | 19 | ####<br>## | 38.2 | 68 | CCAACGTGGATACCCTGGGAGGTCACTCTCCCCAGGCTCTGTCCAAGTGGCATAGG<br>GGAG                                              |
| ex3_42<br>92981_<br>x67 | L36587<br>.1/100-<br>167                           | 21 | 5E-07      | 42.1 | 67 | UUCCUAUGAUGAGGACCUUUUCACAGACCUGUACUGAGCUCGUGAGGAUAAGUA<br>ACUCUGAGGAGAU                                       |
| ex3_42<br>95862_<br>x67 | CM000<br>670.2/3<br>351347<br>5-<br>335135<br>78   | 24 | ####<br>## | 48.1 | 67 | ATCCTTTTGTAGTTCATGAGCGTGATGATTGGGTGTTTCATACGCTTGTGTGAGATGTG<br>CCACCCTTGAACCTTGTTACGACGTGGGCACATTACCCGTCTGACC |
| ex3_43<br>08009_<br>x65 | ENST0<br>000036<br>4113.1                          | 26 | ####<br>## | 52   | 65 | ATCGAGGCTAGAGTCACGCTTGGGTATCGGCTATTGCCTGAGTGTGCTAGAGTCCTC<br>GAA                                              |
| ex3_43<br>16573_<br>x64 | CM000<br>673.2/1<br>230594<br>22-<br>123059<br>335 | 21 | 5E-07      | 42.1 | 64 | TCGCTGTGATGAGTGATTGTTAAACATTCGTAGTTTCCACCAAAGCTTGGCTAATGA<br>TGGCAACACCTTCCTTGGATGTCTGAGCGA                   |
| ex3_43<br>17021_<br>x64 | CM000<br>663.2/1<br>738656<br>86-<br>173865<br>622 | 21 | ####<br>## | 42.1 | 64 | GTGTAATGATGTTGATCAAATGTCTGACCTGAAATGAGCATGTAGACAAAGGTAACAC<br>TGAAGAA                                         |
| ex3_43<br>19773_<br>x64 | AC018<br>761.6/4<br>8391-<br>48315                 | 26 | ####<br>## | 52   | 64 | GGCCUCAAGUGAUGGAGAGCAAUACCCGGGGAUGACUGUGACCACAUUGGGAUG<br>UAUUCGUACUGUCUGAUGGGGCC                             |

|                         |                                                  |    |            |      |    |                                                                                                       |
|-------------------------|--------------------------------------------------|----|------------|------|----|-------------------------------------------------------------------------------------------------------|
| ex3_43<br>24189_<br>x64 | ENST0<br>000036<br>4884.1                        | 25 | ####<br>## | 50.1 | 64 | GGGAATGATGATTTACAGACTAGAGTCTCCGATGCTGGTCATGATGTCAAACCTAA<br>GTT                                       |
| ex3_43<br>31950_<br>x63 | ENST0<br>000042<br>6867.1                        | 35 | 5E-15      | 69.9 | 63 | TCTCAGTGATGTAATTCCAATAGATCCTTCTGACCCTCCACTGTGGACTCAATAGCAG<br>GG                                      |
| ex3_43<br>42047_<br>x61 | CM000<br>663.2/9<br>283728<br>9-<br>928373<br>83 | 28 | ####<br>## | 56   | 61 | GCTGAATGATGATATCCCACTAACTGAGCAGTCAGTAGTTGGTCCTTTGGTTGCATAT<br>GATGCGATAATTGTTTCAAGACGGGACTGATGGCAGC   |
| ex3_43<br>42840_<br>x61 | ENST0<br>000036<br>2883.1                        | 20 | ####<br>## | 40.1 | 61 | GCTGTGATGACATTCCAATTAAGCACGTGTTAGACTGCTGACGCGGGTGATGCGAA<br>CTG                                       |
| ex3_43<br>50038_<br>x61 | CM000<br>679.2/8<br>034584<br>-<br>803448<br>7   | 14 | ####<br>## | 28.2 | 61 | ATCCTTTTGTACTTGGTAAGCATGATGATTGGGTTTTTATGCTTATATATGAGACATGC<br>TTGTCTCAAATCTTGTTACAGCACATTACCCTTCTACT |
| ex3_43<br>50343_<br>x61 | ENST0<br>000040<br>8564.2                        | 21 | ####<br>## | 42.1 | 61 | GTGGCCCTGACTGAAGACCAGCAGTTGTAAGTGTGGCTGTTGGTTTCAAGCAGAGGC<br>CTAA                                     |
| ex3_43<br>55812_<br>x60 | ENST0<br>000038<br>4339.1                        | 26 | ####<br>## | 52   | 60 | CTGCGAATATTCTCGCTGTTCTGATTTTGTAAATAGTCAGGACAGGCTAAACATTGCT<br>AT                                      |
| ex3_43<br>58812_<br>x60 | ENST0<br>000038<br>4792.1                        | 25 | 3E-09      | 50.1 | 60 | GTGCAAACCTCGATCACTAGCTCTGCGTGATGTGGCAGAAGCGAAGGGAACCAGGTT<br>TGCA                                     |
| ex3_43<br>64273_<br>x59 | AC010<br>653.10/<br>104059<br>-<br>104144        | 29 | ####<br>## | 58   | 59 | UGUGUGUUGGAGGAUGAAAGUACGGAGUGAUCCAUCGGCUAAGUGUCUUGUCAC<br>AAUGCUGACACUCAAACUGCUGACAGCACACG            |

|                         |                                                  |    |            |      |    |                                                                                                                                                    |
|-------------------------|--------------------------------------------------|----|------------|------|----|----------------------------------------------------------------------------------------------------------------------------------------------------|
| ex3_43<br>66751_<br>x59 | ENST0<br>000038<br>6847.1                        | 32 | ####<br>## | 63.9 | 59 | TGTCCCTGACCTGGGTAGAGTGGCATCTGGTTGGT<br>GATGCCCATCTCATATCAGCCA<br>GGG                                                                               |
| ex3_43<br>75338_<br>x58 | ENST0<br>000038<br>4581.1                        | 36 | ####<br>## | 71.9 | 58 | ATCCTCCTGATCCCTTTCCCATCGGATCTGAACACTGGTCTTGGTGGTCGTAAAAGG<br>AGG                                                                                   |
| ex3_43<br>85832_<br>x57 | ENST0<br>000038<br>3903.1                        | 20 | ####<br>## | 40.1 | 57 | AGTCTGTGATGAATTGCTTTGACTTCTGACACCTCGTATGAAA<br>ACTGCACGTGCAGTC<br>TG                                                                               |
| ex3_43<br>87713_<br>x57 | ENST0<br>000036<br>5161.1                        | 21 | ####<br>## | 42.1 | 57 | TCTCGTGATGAAA<br>ACTCTGTCCAGTTCTGCTACTGAAGGGAGAGAGATGAGAGCCTT<br>TTA                                                                               |
| ex3_44<br>02448_<br>x55 | CM000<br>673.2/6<br>285563<br>2-<br>628555<br>64 | 21 | ####<br>## | 42.1 | 55 | CTTCCTATGATGAGGACCTTTTCACAGACCTGTACTGAGCTCCGTGAGGATAAATAA<br>CTCTGAGGAGAT                                                                          |
| ex3_44<br>05583_<br>x55 | AC023<br>950.6/1<br>58570-<br>158435             | 25 | 3E-09      | 50.1 | 55 | UGCCCCAUUCUCAAAAGAGAAUAGGCACUGUUGAUCAUGCGAUCCAGAGAUUGUUA<br>AUGGGGCUGCAUUGAGAAACAAGCUAUGUUUCCAUUCACAGCAAACACAUCGCAG<br>UGGUGACAAUGAGACCUGUAACAUIIU |
| ex3_44<br>08622_<br>x54 | AC006<br>435.7/2<br>333-<br>2239                 | 15 | 0.002      | 30.2 | 54 | CUUAAGAGCCAAUGAUGUUUUUAUUCAAAUGUCUGAACCGUCUGAAGCAUCCC<br>AGUGAUGCAACUUCUGUGUGAUACUGAGGCUUUUUUGCCA                                                  |
| ex3_44<br>09486_<br>x54 | AC104<br>446.2/1<br>43509-<br>143592             | 22 | 1E-07      | 44.1 | 54 | UUUUGGUUGAAAUUGAUGAGUGUACAAAUCUUGAUUUUAAGUGAAUGAAAAUUA<br>CAAGAUCCAACUCUGAUUUUCAGCCAGAG                                                            |

|                         |                                                    |    |            |      |    |                                                                                                                                                         |
|-------------------------|----------------------------------------------------|----|------------|------|----|---------------------------------------------------------------------------------------------------------------------------------------------------------|
| ex3_44<br>14022_<br>x54 | ENST0<br>000036<br>5530.1                          | 36 | ####<br>## | 48.1 | 54 | AGCACAAATGATGAATAACAAAGGGACTTAATACTGAAACCTGATGTTACATTGTAGT<br>GT                                                                                        |
| ex3_44<br>28608_<br>x52 | CM000<br>682.2/3<br>842533<br>1-<br>384251<br>98   | 26 | ####<br>## | 52   | 52 | CCCTGTATTTCGAAAGTGATCGTGGGCTGCCTTTGCCCTGGTCATTGATAGTGCAGGG<br>AGAGGAATCAATGAAAGCGCTTCCCCGTGTTTGAAGGGTCCACTCCTATCCCTTCCA<br>AACTCTGGAGCTTTCGTACA         |
| ex3_44<br>38135_<br>x51 | AY349<br>607.1/2<br>-78                            | 33 | ####<br>## | 65.9 | 51 | GUAAAUGAUGACUUCACUUUUUUCCCCAUCAGAUUCGACAAUGCUGACGUCUUUAU<br>UUUUGCCAGUUAGUUCUGAUAC                                                                      |
| ex3_44<br>42266_<br>x51 | CM000<br>680.2/4<br>949172<br>9-<br>494916<br>64   | 21 | ####<br>## | 42.1 | 51 | CTGCGATGATGGCATTCTTAGGACACCTTTGGATTAATAATGAAAACA ACTACTCTC<br>TGAGCAGC                                                                                  |
| ex3_44<br>44000_<br>x51 | ENST0<br>000051<br>6528.1                          | 26 | ####<br>## | 52   | 51 | ATGCATCTATTTGACAGACCTGGAGCAGTTAGTGTGTGCTGCTAAGTTTCTACCTCT<br>AG                                                                                         |
| ex3_44<br>55305_<br>x50 | CM000<br>663.2/1<br>759685<br>40-<br>175968<br>398 | 31 | ####<br>## | 61.9 | 50 | AATGGAAGCTGCTGGAACCAGCCATGTGGACAAATGAAAAAATGCCTTTTGTCTACA<br>GATTGCAGCGATCCTACATAAATATATGGAGGTCTCTGTCTGGCTTAGGACAGCTGG<br>CTAAGTCTGATCGTCCCCCTCCGTACAGC |
| ex3_44<br>60561_<br>x49 | ENST0<br>000036<br>2874.1                          | 27 | ####<br>## | 30.2 | 49 | TTGCAATGATGTGAATCTCTCACTGAATTCAACCTTGAAGTGCGAATCCATGAGCTTT<br>TT                                                                                        |

|                         |                                                  |    |            |      |    |                                                                                                                                                                                                                             |
|-------------------------|--------------------------------------------------|----|------------|------|----|-----------------------------------------------------------------------------------------------------------------------------------------------------------------------------------------------------------------------------|
| ex3_44<br>82071_<br>x47 | CM000<br>682.2/2<br>654212<br>-<br>265428<br>6   | 27 | ####<br>## | 54   | 47 | TTGCAGTGATGACTTGCGAATCAAATCTGTCAATCCCCTGAGTGCAATCACTGATGTC<br>TCCATGTCTCTGAGCAA                                                                                                                                             |
| ex3_44<br>85267_<br>x47 | CM000<br>663.2/3<br>096823<br>6-<br>309681<br>64 | 27 | ####<br>## | 54   | 47 | ACTGGCAAGGATGATACACACTTGCCCTCACTTAGACTATAGTTCACTGATGAGAGC<br>ATTGTTCTGAGCCAGT                                                                                                                                               |
| ex3_44<br>96683_<br>x45 | ENST0<br>000038<br>4574.1                        | 19 | ####<br>## | 38.2 | 45 | TGCACTGCATGGTATCTGCACTCAGCAGTTTACACCTGCTAGGGTGTTCAAAGGTCA<br>GTG                                                                                                                                                            |
| ex3_45<br>06533_<br>x44 | AF141<br>346.1/1<br>052-<br>1111                 | 37 | ####<br>## | 73.8 | 44 | AGCCUGUGAUGCUIUUAAGAGUAGUGGACAGAAGGGAUUUCUGAAAUUCUAUUCUG<br>AGGCU                                                                                                                                                           |
| ex3_45<br>16521_<br>x44 | CM000<br>681.2/5<br>713426<br>0-<br>571340<br>49 | 17 | ####<br>## | 34.2 | 44 | CACTTTATACTTTTAGGGATGATTTCTATAATTCATGAGTGGAGAGGTTTCTCTAGAG<br>GTGTAGGGGACTGGAAACCACATCCAGGAAGTACAGCTTTCTCTCCTGAGCATGAAG<br>GTATCTTGGCATTCTTCACTGCAATTGCCATTTGCCTTTTTGTTTTTCTTTTGAGA<br>TAGGGTGTACCTGTTGCCAGGCTGGAGGGCAGTGGT |
| ex3_45<br>19077_<br>x43 | CM000<br>673.2/6<br>285396<br>8-<br>628539<br>04 | 23 | ####<br>## | 46.1 | 43 | TTTCTATGATGAATCAAACCTAGCTCACTATGACCGACAGTGAAAATACATGAACACCT<br>GAGAAAC                                                                                                                                                      |

|                         |                                                    |    |            |      |    |                                                                                                                                                   |
|-------------------------|----------------------------------------------------|----|------------|------|----|---------------------------------------------------------------------------------------------------------------------------------------------------|
| ex3_45<br>23506_<br>x43 | CM000<br>663.2/1<br>542597<br>27-<br>154259<br>862 | 28 | ####<br>## | 56   | 43 | GGGCATACCCGTAGACCTTGTCTGACTGTGCTCATGGCCAGGCAGGGGGGACAGTG<br>TATGCAAGAGTAATGTGGAGTTTGTGCTAACTCTAGCCAGCTTAATTAGTGACTGGAT<br>AAATTGCACAACCTCTCACATTC |
| ex3_45<br>25140_<br>x43 | AC010<br>361.3/2<br>3932-<br>23994                 | 26 | ####<br>## | 52   | 43 | GUGCAUGUGAUGAAGCAAAUCAGUAUGAAUGAAUUCAUGAUACUGUAAACGCUUU<br>CUGAUGUA                                                                               |
| ex3_45<br>26043_<br>x43 | CM000<br>663.2/4<br>477586<br>4-<br>447759<br>43   | 23 | 4E-08      | 46.1 | 43 | CGTGTATGATGACAACCTCGGTAATGCTGCATACTCCCGAGTGCGCGGTGGGGAAGC<br>CAACCTTGAGAGCTGAGCGTGCG                                                              |
| ex3_45<br>37956_<br>x42 | AJ2240<br>26.1/1-<br>80                            | 29 | 2E-11      | 58   | 42 | GUGCCCUGCCUCUGAUGAAGCCUGUNUUGGUAGGGACAUCUGAGAGUAAUGAUG<br>AAUGCCAACCGCUCUGAUGGUGGCAC                                                              |
| ex3_45<br>39636_<br>x42 | CM000<br>682.2/4<br>928031<br>9-<br>492804<br>09   | 33 | ####<br>## | 65.9 | 42 | GCTGGCATATATGATGACTTAGCTTTTTTCCCGACAGATCGACTATGTTGATCTAAC<br>TTTTCTAAGCCAGTTTCTGTCTGATATGCCAGC                                                    |
| ex3_45<br>44282_<br>x41 | ENST0<br>000040<br>8376.1                          | 20 | ####<br>## | 40.1 | 41 | TGATGACTGTTCTTCCTGTTGCCTTCAGACCTGGCATTAGGATTTAGGTCATCATAA<br>AT                                                                                   |
| ex3_45<br>47193_<br>x41 | ENST0<br>000038<br>4693.1                          | 22 | ####<br>## | 44.1 | 41 | GTTTGTGATGACTTACATGGAATCTCGTTCGGCTGATGACTTGCTGTTGAGACTCTGA<br>AA                                                                                  |

|                         |                                                    |    |            |      |    |                                                                                                   |
|-------------------------|----------------------------------------------------|----|------------|------|----|---------------------------------------------------------------------------------------------------|
| ex3_45<br>48915_<br>x41 | AF141<br>346.1/1<br>275-<br>1356                   | 28 | ####<br>## | 56   | 41 | UGCCACAAUGAUGACAGUUUUAUUUGCUACUCUUGAGUGCUAGAAUGAUGAGGAUC<br>UUAACCACCAUUAUCUUAACUGAGGCA           |
| ex3_45<br>51523_<br>x40 | ENST0<br>000045<br>9433.1                          | 31 | 1E-12      | 61.9 | 40 | GGTTCATGATGACACAGGACCTTGTCTGAACATAATGATTTCAAATTTGAGCTTAAA<br>AA                                   |
| ex3_45<br>66668_<br>x39 | AC006<br>435.7/3<br>490-<br>3399                   | 27 | ####<br>## | 54   | 39 | UAGAGAAGUCAAUUGAUGGUUUUAUUCUAUUCGUCUGAACCUGUCUGAAGCAUCUC<br>AGUGAUGCAAUCUCUGUGUGGUUCUGAGACUUCUCCA |
| ex3_45<br>67526_<br>x39 | AF141<br>346.1/3<br>076-<br>3157                   | 48 | ####<br>## | 56   | 39 | CCGAUACAAUGAUGAUACAUAAGUUCAGCAGACUAACGCUGAUGAGCAAUAUUAAG<br>UCUUUCGCUCCUAUCUGAUGUAUCUG            |
| ex3_45<br>67565_<br>x39 | CM000<br>663.2/1<br>738660<br>28-<br>173865<br>968 | 35 | 5E-15      | 69.9 | 39 | CCTGGATGATGATAAGCAAATGCTGACTGAACATGAAGGTCTTAATTAGCTCTAACTG<br>ACT                                 |
| ex3_45<br>71348_<br>x39 | CM000<br>682.2/4<br>928068<br>3-<br>492807<br>72   | 29 | ####<br>## | 58   | 39 | GCCTTTGCAGCTGATGATACAGCTTCTTTCCCATCAGATCGACCCTGTTGATCTCTA<br>CACTATTGGCCAGTTTTGTCTGATGCATTGGC     |
| ex3_45<br>71738_<br>x39 | AB061<br>826.1/4<br>476-<br>4547                   | 23 | ####<br>## | 46.1 | 39 | AGCUUAAUGAUGACUGUUUUUUUUGAUUGCUUGAAGCAAUGUGAAAAACACAUUU<br>CACCGGCUCUGAAAGCU                      |
| ex3_45<br>72362_<br>x39 | ENST0<br>000038<br>4072.1                          | 25 | ####<br>## | 50.1 | 39 | TGGTCATTACCAAGGCTTTTAGAATGCAGTTTCTCATTTGCTGTGGACATGACCATAA<br>AA                                  |

|                         |                                                  |    |            |      |    |                                                                                                                                                                                                |
|-------------------------|--------------------------------------------------|----|------------|------|----|------------------------------------------------------------------------------------------------------------------------------------------------------------------------------------------------|
| ex3_45<br>75363_<br>x38 | CM000<br>673.2/6<br>285469<br>5-<br>628546<br>21 | 27 | ####<br>## | 54   | 38 | GTCAGATGATTTGAATTGATAAGCTGATGTTCTGTGAGGTACAAAAGTTAATAGCATG<br>TTAGAGTTCTGATGGCA                                                                                                                |
| ex3_45<br>84027_<br>x38 | AM055<br>745.1/1<br>-178                         | 28 | ####<br>## | 56   | 38 | ACCUUCUUGUAUAAGCACUGUGCUAAAAUUGCAGACACUAGGACCAUGUCUUGGU<br>UUUUGCAAUAUUGCUUGCAGAGUACACACAAGAAGAAAAGUAACAGCACUAGAUUG<br>UAAAGACUGGGGUGGACCUCUUUCUUAUUGUCCAAUGUCCUUUGUCUUAAGAUUU<br>GGUGCAAUAUCU |
| ex3_45<br>95578_<br>x37 | ENST0<br>000040<br>8587.1                        | 38 | 1E-16      | 75.8 | 37 | CAGCCTGAAGTGATGATTCACATTCATGTCTCTTCTCTGATAAATTCTTGAAGAAAATT<br>T                                                                                                                               |
| ex3_45<br>97576_<br>x37 | ENST0<br>000038<br>4096.1                        | 27 | ####<br>## | 54   | 37 | CTCCATGTATCTTTGGGACCTGTCAGCCGTGGCAGTCTCCCTTCCTAGCCATGGAAG<br>AGC                                                                                                                               |
| ex3_45<br>98242_<br>x37 | AB017<br>710.1/1<br>702-<br>1771                 | 24 | ####<br>## | 48.1 | 37 | AAUCAAUUGAUGAAACCUAUCCCGAAGCUGAUAAACCUGAAGAAAAUAAGUACGGAU<br>UCGGCUUCUGAGAU                                                                                                                    |
| ex3_45<br>98575_<br>x37 | CM000<br>684.2/2<br>933325<br>8-<br>293331<br>63 | 14 | ####<br>## | 28.2 | 37 | ACCCCTGGCAGCCCTCCTGATGATTCTTCTTCCTGAGCACGCTCATGATGAGCAAA<br>CTGAGCCTCTAAGAAGTTGACTGAAGGGGCTGCTTCCCC                                                                                            |
| ex3_45<br>98649_<br>x37 | ENST0<br>000039<br>0994.1                        | 34 | ####<br>## | 67.9 | 37 | AGCTTATCAGTGATGTTGTAAAAATAAATGTCTGAACATATGAATGCAGTATTGATTC<br>A                                                                                                                                |

|                         |                                                |    |            |      |    |                                                                                         |
|-------------------------|------------------------------------------------|----|------------|------|----|-----------------------------------------------------------------------------------------|
| ex3_45<br>99877_<br>x36 | AC093<br>484.2/1<br>62015-<br>162087           | 21 | ####<br>## | 42.1 | 36 | AAAUGAUGAAAUCACCCAAAAUAGCUGGAAUUACCGGCAGAUUGUGUAGUGGUGA<br>ACCUAUGGUUUUCUGAAG           |
| ex3_46<br>01461_<br>x36 | ENST0<br>000036<br>5444.1                      | 51 | ####<br>## | 61.9 | 36 | CGATGTTATGATGATGGGCGAAATGTTCAACTGCTCTGAAGGGGCTGAATGAAAATG<br>GCC                        |
| ex3_46<br>02577_<br>x36 | AJ0106<br>76.1/1-<br>70                        | 24 | ####<br>## | 48.1 | 36 | GCUGUGAUGACAUUCCAAUJAAAGCACGUGUUAGACUUCUGACGCGGGUGAUGC<br>GAACUGGAGUCUGAGC              |
| ex3_46<br>12047_<br>x35 | CM000<br>678.2/2<br>155105<br>-<br>215502<br>3 | 20 | 2E-06      | 40.1 | 35 | AGTCTGTGATGAATTGCTTTGACTTCTGACACCTCGTATGAAAAGTGCACGTGCAGTC<br>TGATTATTTAGCAAGACTGAGGCTT |
| ex3_46<br>13622_<br>x35 | ENST0<br>000058<br>1525.1                      | 39 | 0.008      | 30.2 | 35 | CGTGTATGATGACAACCTCGGTAATGCTGCATACTCCCGAGTGCGCGGTGGGGAAGC<br>CAAC                       |
| ex3_46<br>14812_<br>x35 | ENST0<br>000045<br>9004.1                      | 20 | 2E-06      | 40.1 | 35 | TTGCATGTGGAAATGTCTGCTTCTCATTCTTGGGAGCAGGAATATGTTCATAACATG<br>CT                         |
| ex3_46<br>20657_<br>x35 | ENST0<br>000060<br>6769.1                      | 17 | ####<br>## | 34.2 | 35 | AAGCAACACTCTGTGGCAGATGATCAAACTGTCTGACACAATTTGAGCTTGCTATAG<br>CA                         |
| ex3_46<br>29699_<br>x34 | ENST0<br>000051<br>6624.1                      | 24 | ####<br>## | 48.1 | 34 | ATGCATCTATTTGACAGACCTGGAGTAGTTACTGTCTGCTGCTAAGGTTTCCACTACA<br>GA                        |
| ex3_46<br>32045_<br>x34 | ENST0<br>000040<br>8189.1                      | 31 | ####<br>## | 61.9 | 34 | TTGCAGTGATGACTTGCGAATCAAATCTGTCAATCCCCTGAGTGCAATCACTGATGTC<br>TC                        |

|                         |                                                  |    |            |      |    |                                                                                                                                              |
|-------------------------|--------------------------------------------------|----|------------|------|----|----------------------------------------------------------------------------------------------------------------------------------------------|
| ex3_46<br>32657_<br>x34 | L44140<br>.1/7071<br>6-<br>70850                 | 43 | ####<br>## | 85.7 | 34 | CCGCAGCCAAUUAAGCCGACUGAGUUCUUCUCAUGGGGACCCAGUGUGCGA<br>UGGCUGCACACAGCAGCUUCCUUGGUAGUGUACGCAGCCUGUUGGUUGUAUGGG<br>UUGCUCUAAGGGACCUUGGAGACAGGC |
| ex3_46<br>38765_<br>x33 | CM000<br>677.2/2<br>507411<br>4-<br>250742<br>15 | 14 | 0.008      | 28.2 | 33 | AGGTTGATGATGACTTACATATATACGTTTTTTTTTTTTTTTTTTGGAAAGGTGAACAAA<br>TGAGTGAAACTCAGTACCATCATCCTCATCTAACTGAGGTCC                                   |
| ex3_46<br>39920_<br>x33 | ENST0<br>000038<br>3884.1                        | 30 | 5E-07      | 44.1 | 33 | TGCAGATGATGTAAAAGAATATTTGCTATCTGAGAGATGGTGATGACATTTTAAACCA<br>CC                                                                             |
| ex3_46<br>48830_<br>x33 | GL000<br>250.2/3<br>167878<br>-<br>316794<br>0   | 40 | 7E-18      | 79.8 | 33 | AGTGATGATGACCCCAGGTA ACTCTGAGTGTGTCGCTGATGCCATCACCGCAGCGC<br>TCTGACC                                                                         |
| ex3_46<br>50638_<br>x32 | ENST0<br>000041<br>0557.1                        | 24 | ####<br>## | 48.1 | 32 | TGATGGCTGTTCCCTCTCACTGCTTGAAGCCTTAGGCAGTGGGATTTTGATCCATCATA<br>TA                                                                            |
| ex3_46<br>51214_<br>x32 | ENST0<br>000051<br>6327.1                        | 14 | ####<br>## | 28.2 | 32 | AGTTACTGTCTGCTGCTAATGTTTCCACTACAGATAACAAGAAAAAGTCTCTTCACACT<br>TT                                                                            |

|                         |                           |    |            |      |    |                                                                                                                                                                                                                         |
|-------------------------|---------------------------|----|------------|------|----|-------------------------------------------------------------------------------------------------------------------------------------------------------------------------------------------------------------------------|
| ex3_46<br>53966_<br>x32 | L07382<br>.1/2-<br>208    | 23 | 4E-08      | 46.1 | 32 | CCAACGUGGAUACACCCUGGGAGGUCACUCUCCCCGGGCUCUGUCCAAGUGGCG<br>UAGGGGAGCAUAGGGCUCUGCCCAUGAUGUACAAGUCCCUUCCACAACGUUG<br>GAAAUAAAGCUGGGCCUCGUGUCUGCGCCUGCAUAUUCUACAGCUUCCAGAGU<br>CCUGUCGACAAUUACUGGGGAGACAAACCAUGCAGGAAACAGCC |
| ex3_46<br>56334_<br>x32 | ENST0<br>000038<br>6148.1 | 38 | 5E-07      | 44.1 | 32 | GATCCTGGTGATGACAGACGACATTGTCAGCCAATCCCCATGTGGTAGTGAGGACAT<br>GTC                                                                                                                                                        |
| ex3_46<br>59662_<br>x32 | ENST0<br>000036<br>5607.2 | 35 | ####<br>## | 69.9 | 32 | CTTCCTATGATGAGGACCTTTTCACAGACCTGTACTGAGCTCCGTGAGGATAAATAA<br>CTC                                                                                                                                                        |
| ex3_46<br>62923_<br>x31 | AJ6094<br>59.1/1-<br>132  | 32 | ####<br>## | 56   | 31 | CUUCCCAUUUAAUUUGCUGCUUGUAGUCUCACAGUGAUACGAGCAGUUUACGCAU<br>GGGAUAAAAUAACAUUGGGCCACUGUAAAUUGAGAUGAAGUAACCAUUUUCUUCU<br>CUUCUGCAGGGACUAGACAUUG                                                                            |
| ex3_46<br>64349_<br>x31 | ENST0<br>000041<br>0433.1 | 21 | ####<br>## | 42.1 | 31 | GCTGGCATATATGATGACTTAGCTTTTTTCCCCGACAGATCGACTATGTTGATCTAAC<br>TT                                                                                                                                                        |
| ex3_46<br>65372_<br>x31 | ENST0<br>000038<br>3893.1 | 33 | ####<br>## | 65.9 | 31 | GGTCAATGATGAGTTGGCATGTATTCTGAATCTAAAGTTGATTATTACTACTTTAGCTC<br>T                                                                                                                                                        |
| ex3_46<br>70611_<br>x31 | ENST0<br>000038<br>4512.1 | 33 | 1E-13      | 65.9 | 31 | GGTCAATGATGTGTTGGCATGTATTATCTGAATCTATTGCTGATGTGTAATAACACTTT<br>A                                                                                                                                                        |

|                         |                                                  |    |            |      |    |                                                                                                                                                                                                         |
|-------------------------|--------------------------------------------------|----|------------|------|----|---------------------------------------------------------------------------------------------------------------------------------------------------------------------------------------------------------|
| ex3_46<br>78773_<br>x30 | AF141<br>346.1/1<br>960-<br>2019                 | 26 | ####<br>## | 52   | 30 | CCUGGAUGAUGAUAGCAAUUGCUGACUGAACAUAGAAGGUCUUAUUAGCUCUAAC<br>UGACU                                                                                                                                        |
| ex3_46<br>97177_<br>x29 | CM000<br>672.2/4<br>341743<br>8-<br>434172<br>49 | 15 | ####<br>## | 30.2 | 29 | TAGGCGGCTTTCAGGGATCATTCTATAGTCTGCTACTAGAGTACTTTCTGTGAAAGT<br>GTAGAGCCCCCGAAACGACAGGAGGTGCAGTTTTCTCCTGAGTGTGAAGCCGGCG<br>CTTGGTGTGCTTTCGCCATTGAGGTTTCTTCTCCTCCGTGGGGGAATGAGAGGGAG<br>AGGACACAGGCTGAATGGT |
| ex3_46<br>97641_<br>x29 | ENST0<br>000036<br>3961.1                        | 22 | ####<br>## | 44.1 | 29 | TTGCAGTGATGTAAAATTTCTTGGCCTGAAATTACTGTGAAGAGTAAAACCGAGCTTT<br>TT                                                                                                                                        |
| ex3_47<br>10446_<br>x28 | AJ2240<br>27.1/1-<br>88                          | 19 | ####<br>## | 38.2 | 28 | UACUGUUAGUGAUGAUUUUAAAAUUAAAAGCAGAUGGGAAUCUCUCUGAGAAAGA<br>AAAUGGGAGAUUAAUCCUUAACCUGAAACAGUA                                                                                                            |
| ex3_47<br>14702_<br>x28 | ENST0<br>000036<br>2761.1                        | 27 | 2E-10      | 54   | 28 | GCGGCCGGTGATGAGAACTTCTCCCACTCACATTCGAGTTTCCCGACCATGAGATGA<br>CTC                                                                                                                                        |
| ex3_47<br>15710_<br>x28 | CM000<br>673.2/6<br>285536<br>6-<br>628552<br>92 | 21 | 5E-07      | 42.1 | 28 | CTACGGGGATGATTTTACGAACTGAACTCTCTTTCTGATGGATTAGTGGAGAAAAC<br>AGAAAATTCTGAGTAGC                                                                                                                           |
| ex3_47<br>15794_<br>x28 | KN196<br>479.1/1<br>75490-<br>175564             | 38 | 1E-16      | 75.8 | 28 | TGCAGATGATGTAAAAGAATATTTGCTATCTGAGAGATGGTGATGACATTTTAAACCA<br>CCAAGATCGCTGATGCA                                                                                                                         |
| ex3_47<br>16522_<br>x28 | ENST0<br>000036<br>5223.1                        | 38 | 3E-14      | 67.9 | 28 | TTGCTGTGATGACTATCTTAGGACACCTTTGGAATAACTATGAAAGAAAATTTCTG<br>AG                                                                                                                                          |

|                         |                                                    |    |            |      |    |                                                                                               |
|-------------------------|----------------------------------------------------|----|------------|------|----|-----------------------------------------------------------------------------------------------|
| ex3_47<br>17334_<br>x28 | CM000<br>664.2/2<br>892798<br>3-<br>289280<br>60   | 26 | 8E-10      | 52   | 28 | TTGCTGTGATGACTATCATTGGGTTTTCGCATGTTGCTGAGTTCAGTGATGCCTCTTT<br>TCTCTTGGCTGTCTGAGCAA            |
| ex3_47<br>18849_<br>x27 | ENST0<br>000038<br>4550.1                          | 26 | ####<br>## | 52   | 27 | TGGATATGATGACTGATTACCTGAGAAATAATTGATGAAATCTCAAGAAAATTCCTCT<br>AG                              |
| ex3_47<br>19713_<br>x27 | AC078<br>797.20/<br>67061-<br>67136                | 27 | ####<br>## | 54   | 27 | UUCCUCUGAUGACUCCUGUUAGUGCCACGUGUCUGGGCCACUGAGACACCAUG<br>AUGGAACUGAGGAUCUGAGGAA               |
| ex3_47<br>21900_<br>x27 | CM000<br>665.2/1<br>867847<br>96-<br>186784<br>864 | 39 | 3E-17      | 77.8 | 27 | AAGTGAAATGATGGCAATCATCTTTTCGGGACTGACCTGAAATGAAGAGAATACTCATT<br>GCTGATCACTT                    |
| ex3_47<br>22656_<br>x27 | AC011<br>031.12/<br>168663<br>-<br>168575          | 20 | 2E-06      | 40.1 | 27 | GCUGGCACAAUGAUGACUAAAAUUACUUUUUGCCGUUUACCCAGCUGAGGUUGUC<br>UUUGAAGAAAUAUUUUUAAGACUGAGAUGCCAGU |
| ex3_47<br>23790_<br>x27 | AC097<br>720.5/9<br>9784-<br>99861                 | 25 | 3E-09      | 50.1 | 27 | AUGCUAUGAUGACAUCCAUUUGGUUUCGCUGCUGGCUGAGUUUCAGAGAUGACAC<br>CUUUCUCUUGGCUGUCUGAGCAU            |
| ex3_47<br>31782_<br>x27 | ENST0<br>000040<br>8813.1                          | 29 | 2E-11      | 58   | 27 | TGGCCAAGGATGAGAACTCTAATCTGATTTTATGTGCTTCTGCTGTGATGGATTAAAG<br>GA                              |
| ex3_47<br>33115_<br>x26 | ENST0<br>000038<br>4674.1                          | 21 | 5E-07      | 42.1 | 26 | ACTCTCTCGGCTCTGCATAGTTGCACTTGGCTTCACCCGTGTGACTTTCGTAACGGG<br>GAG                              |

|                  |                        |    |            |      |    |                                                                                                                                                                                                                                                                                    |
|------------------|------------------------|----|------------|------|----|------------------------------------------------------------------------------------------------------------------------------------------------------------------------------------------------------------------------------------------------------------------------------------|
| ex3_47_34207_x26 | ENST0000516652.1       | 16 | 0.0006     | 32.2 | 26 | GCTACTCTTGAACCTCCTGACCTCAACTGATCCACCCGCCTCGGCCTCCCAAAGTATGAAA                                                                                                                                                                                                                      |
| ex3_47_34727_x26 | ENST0000384762.1       | 23 | ####<br>## | 46.1 | 26 | AGCACTATATTTAAACCTGTGGATGGGAATATTCCCCATTCTTGGTTACGCTGTAGTGCA                                                                                                                                                                                                                       |
| ex3_47_35247_x26 | AC097720.5/86379-86467 | 36 | ####<br>## | 71.9 | 26 | UGGUGCUGUGAUGAUGCCUAAAUUUUGUGGUUUCGACUCACUGAGAGUAAAAUGAGGACCUACAAUCCUUGGCUGUGUCUGAGCACCC                                                                                                                                                                                           |
| ex3_47_36677_x26 | ENST0000390856.1       | 21 | ####<br>## | 42.1 | 26 | TTCCTCTGATGACTTCCTGTTAGTGCCACGTGTCTGGGCCACTGAGACACCATGATGGAA                                                                                                                                                                                                                       |
| ex3_47_41045_x26 | AF492209.1/1-275       | 28 | 6E-11      | 56   | 26 | AAUCUGUAGUCUUGGAGCCGCACAGGGUUGGUGGUACCCUCGAGCACACCAGACUUGCAGAAAAAGCAUACUCCAGAGGAAGCUGAGGCAUGCCUGCUCGAGAGCCAGCUGUCCAUGUGCAAUUUCCUCUGAUAGUUUCUGGUCACUGUUGCCACGGUGAAUGACUGGGCUAUGUCAUUUCUAUCCGCCAACAGUAAGAGAAGCUUUGCAGUCGAGAUUUUGUUUAGCAGAUGGAGUGUUUUCUGUUGAACACUAAGUACUGCCACAA<br>GU |
| ex3_47_42007_x26 | ENST0000386910.1       | 29 | 2E-11      | 58   | 26 | CCCCTATCTCTCATGATGAACACATATGCCTCTGAGCTGCTGTGATTTCTGGCTTCAAAG                                                                                                                                                                                                                       |
| ex3_47_43619_x26 | ENST0000439232.2       | 21 | 5E-07      | 42.1 | 26 | ACTCACTCACTGCCCTATTTTGTCCCTGTATTTCGAAAGTGATCGTGGGCTGCCTTTGCC                                                                                                                                                                                                                       |

|                         |                                                |    |            |      |    |                                                                                                                                      |
|-------------------------|------------------------------------------------|----|------------|------|----|--------------------------------------------------------------------------------------------------------------------------------------|
| ex3_47<br>51321_<br>x25 | CM000<br>681.2/3<br>982572<br>-<br>398250<br>7 | 32 | 3E-13      | 63.9 | 25 | ATTCGTGATGACTGATCATTCTTCACTTTGACCAGATGTCTACTGAAGAAAGCCTGC<br>GTCTGAGG                                                                |
| ex3_47<br>51446_<br>x25 | ENST0<br>000038<br>6307.1                      | 47 | ####<br>## | 54   | 25 | GCTGGTGTAATGATGACTTCACTTTTTTCCCATCAGATCGACAATGCTGACGTCTT<br>AT                                                                       |
| ex3_47<br>54496_<br>x25 | L36588<br>.1/797-<br>921                       | 25 | 3E-09      | 50.1 | 25 | UCCCAAUGAAGAAACUUUCACAUGUCUUACUCUCUGUCCUAGUCCAGAGCCUGU<br>AAAGGUGAACCACUGGGACUGGCUGGGGGGAGAAGAGGAAGAUUUGUCCAGAAG<br>GAACUGUCUGAGGGAU |
| ex3_47<br>54746_<br>x25 | ENST0<br>000062<br>8590.1                      | 28 | ####<br>## | 56   | 25 | ACGCGCTGTCTTTGAGCCCCGCCGAGCTTCTCGTGGCGCCGGGGTCAATCTGC<br>AGCG                                                                        |
| ex3_47<br>58471_<br>x25 | GL000<br>250.2/3<br>169692<br>-<br>316975<br>8 | 27 | ####<br>## | 54   | 25 | GGGAATGATGATTTACAGACTAGAGTCTCCGATGCTGGTCATGATGTCAAACCTAA<br>GTTCTGACTC                                                               |
| ex3_47<br>58846_<br>x25 | ENST0<br>000036<br>5382.1                      | 25 | 3E-09      | 50.1 | 25 | TCGCTGTGATGAGTGATTGTAAACATTCGTAGTTTCCACAAAAGCTTGGCTAATGA<br>TG                                                                       |
| ex3_47<br>63971_<br>x25 | ENST0<br>000036<br>4432.1                      | 24 | ####<br>## | 48.1 | 25 | CCCGCCACTGCACCTGACCAGGTCTCTGTTGGCTGGTGCAATCCAGTGGTGAGCTG<br>ATAG                                                                     |
| ex3_47<br>64246_<br>x25 | ENST0<br>000036<br>5493.1                      | 20 | ####<br>## | 40.1 | 25 | TGTGCACATTGTTAGAGCTTGGAGTTGAGGCTACTGACTGGCCGATGAACTCGCAAG<br>TGT                                                                     |

|                         |                                                    |    |            |      |    |                                                                                                                                                                                                                                                                                                                                                                     |
|-------------------------|----------------------------------------------------|----|------------|------|----|---------------------------------------------------------------------------------------------------------------------------------------------------------------------------------------------------------------------------------------------------------------------------------------------------------------------------------------------------------------------|
| ex3_47<br>66864_<br>x24 | ENST0<br>000045<br>8770.1                          | 23 | ####<br>## | 46.1 | 24 | CCACATGCGGCTGATGACAGCACTTCTGCTGAGACGCTGTGATTGCTCTGTCCAAAG<br>TAA                                                                                                                                                                                                                                                                                                    |
| ex3_47<br>67536_<br>x24 | CM000<br>664.2/2<br>314604<br>40-<br>231460<br>371 | 26 | 8E-10      | 52   | 24 | AGCACAAATGATGAATAACAAAGGGACTTAATACTGAAACCTGATGTTACATTGTAGT<br>GTGCTGATGTGC                                                                                                                                                                                                                                                                                          |
| ex3_47<br>74352_<br>x24 | AY077<br>740.1/1<br>-330                           | 21 | ####<br>## | 42.1 | 24 | UGGAAAUGAUGAAAUAGAGAUAAUUGGGUGUUGAAUGUUGUAUGACUGGAAUUU<br>UUAAUAUGUAUUAUUGUAAUUCUUUAUAAGUUUAGUGUUUUUAUAGGUACUUAAUA<br>GAGAGUGUGUAUGCAUGUGUGUGUCUUGUGGGUGGCUAUGGAAAGGGGACUG<br>ACUGGUGAUGCUGAUUAUUGGAGUGCAUCUGAGGCUGUUGUAGAAAUAACAUGGG<br>UUGUUGAUUACAACAUUGCCAAUGAUUAUAACCCAAGAACAGCUCACCUAACUAGC<br>CUGGCACCCUAAAAUCUCUAACAGGUUCAUUAUUAAUUGGUCCUGUGAUCUGAUCCA<br>A |
| ex3_47<br>77088_<br>x24 | ENST0<br>000036<br>3753.1                          | 14 | 0.008      | 28.2 | 24 | CAGTAGTGATGAAATTCCACTTCATTGGTCCGTGTTTCTGAACCACATGATTTTCTCG<br>GA                                                                                                                                                                                                                                                                                                    |
| ex3_47<br>89817_<br>x23 | CM000<br>682.2/3<br>843399<br>8-<br>384338<br>65   | 25 | ####<br>## | 50.1 | 23 | ACCTGTATTGAAAAGTGATCGTGGGCTGCCTGTGCCCTGGTCATTGATAGTGCAGG<br>GAGAGAAATCGCGGAAAGTGCTTCCCCGTGTTTGGAGGGTCCGCTCCTGTCCCTTT<br>CAAACCTCTGGAGCTTTCTCACA                                                                                                                                                                                                                     |

|                         |                                                    |    |            |      |    |                                                                                     |
|-------------------------|----------------------------------------------------|----|------------|------|----|-------------------------------------------------------------------------------------|
| ex3_47<br>93957_<br>x23 | ENST0<br>000038<br>4567.1                          | 29 | ####<br>## | 58   | 23 | ATGCGATGATGAGTGAAGTAGAGCCTGACCTGGTATTGCCATTGCTTCACTGTTGGC<br>TTT                    |
| ex3_47<br>96395_<br>x23 | CM000<br>667.2/1<br>812418<br>92-<br>181241<br>814 | 28 | 6E-11      | 56   | 23 | GGTCCTGGTGATGACAGATGGCATTGTCAGCCAATCCCCAAGTGGGAGTGAGGACA<br>TGTCCTGCAATTCTGAAGGGATT |
| ex3_47<br>98777_<br>x22 | ENST0<br>000050<br>5219.1                          | 27 | ####<br>## | 54   | 22 | GGGCATACTCGTAGACCTTGCCTGACTGTGCTCATGTCCAGGCAGGGGGGACAGTG<br>TATG                    |
| ex3_48<br>01615_<br>x22 | ENST0<br>000038<br>4323.1                          | 27 | ####<br>## | 54   | 22 | TACCCCTTTTCACTTTGCCAGTTGGACTTATGTCTTTATTGGTCATTCAAGTGGGGC<br>AA                     |
| ex3_48<br>04387_<br>x22 | CM000<br>667.2/1<br>385611<br>10-<br>138561<br>043 | 31 | 1E-12      | 61.9 | 22 | GTGCAATGATGTATTTTATTCAACACATCATTCTGAAAGAACGTGTGGAAAATAATG<br>ACTGAGCACA             |
| ex3_48<br>09733_<br>x22 | AK095<br>849.1/8<br>03-874                         | 28 | ####<br>## | 56   | 22 | ACUCCAUGAUGAACACAAAAUGACAAGCAUAUGGCUGAACUUUCAAGUGAUGUCAU<br>CUUACUACUGAGAAGU        |
| ex3_48<br>09887_<br>x22 | AB061<br>824.1/2<br>400-<br>2464                   | 22 | ####<br>## | 44.1 | 22 | CUGCAGUGAUGACUUUCUUGGGACACCUUUGGAUUUACCGUGAAAAUUAAUAAU<br>UCUGAGCAGC                |
| ex3_48<br>10745_<br>x22 | AF019<br>618.1/4<br>8-114                          | 21 | ####<br>## | 42.1 | 22 | GGAUUUGUGAUGAGCUGUGUUUACUGAGCAUGAUGAAGUAAAGCUCACGUGAUU<br>ACUCUGAAGUCC              |
| ex3_48<br>15311_<br>x21 | ENST0<br>000038<br>4714.1                          | 21 | 5E-07      | 42.1 | 21 | CTTCAGTGATGACACGATGACGAGTCAGAAAGGTCACGTCTGCTCTTGGTCCTTGT<br>CAG                     |

|                         |                                                |    |            |      |    |                                                                                                                                                                                                           |
|-------------------------|------------------------------------------------|----|------------|------|----|-----------------------------------------------------------------------------------------------------------------------------------------------------------------------------------------------------------|
| ex3_48<br>22136_<br>x21 | ENST0<br>000038<br>4304.1                      | 32 | ####<br>## | 63.9 | 21 | CCTTCTATGATGATTTTATCAAATGACTTTCGTTCTTCTGAGTTTGCTGAAGCCACAT<br>T                                                                                                                                           |
| ex3_48<br>24320_<br>x21 | AJ6094<br>86.1/1-<br>187                       | 21 | 5E-07      | 42.1 | 21 | ACGGUCUGGGGAAAGGCUCCUGUGUUGUUGAGCCUGCCAAGUUGUGGGUGCAGC<br>AUGGUACCAGGCAGCCCAACCCUGACCUAAAAGUAAAUJCCCGGAAGAAGUCUUUC<br>CUGGGUUUUGAAUUUGCAGUAAACAGGUGUGAGCAUUCUAGCAGCAGUUUGAUGA<br>UCAUGUAUGAUACUGCAAACAGGA |
| ex3_48<br>29213_<br>x21 | AC018<br>607.12/<br>34735-<br>34867            | 31 | ####<br>## | 61.9 | 21 | AGCCUCAUGCUAGAUGAGAAUGGGCACUGUUGAUCAAGGUGUCCAAAAUAGUUA<br>AUGUGGCUAAAUUGAGAUAGGUUAUGCUUCCAUCACAGUAUGCAUUAUUGCAGUGG<br>UGACAAUGAGACCUGUAACAUUU                                                             |
| ex3_48<br>35196_<br>x20 | ENST0<br>000036<br>4578.1                      | 19 | ####<br>## | 38.2 | 20 | AAGCAGGATTCAGACTACAATATAGCTGTAAAGTGCTGTATTGTCATTCCCCCTGCTC<br>AA                                                                                                                                          |
| ex3_48<br>39376_<br>x20 | CM000<br>682.2/2<br>656624<br>-<br>265669<br>4 | 21 | 5E-07      | 42.1 | 20 | CCACAATGATGGCAATATTTTTTCGTCAACAGCAGTTCACCTAGTGAGTGTTGAGACTC<br>TGGGTCTGAGTGA                                                                                                                              |
| ex3_48<br>41036_<br>x20 | AJ6094<br>65.1/1-<br>134                       | 35 | 5E-15      | 69.9 | 20 | UGGUAAUGGAUUUAUGGUGGGUCCUUCUCUGUGGGCCUCUCAUAGUGUACCCAU<br>GCCAUAGCAAUUGGCAGCCUCGAACCAUUGCCCAGUCCCCUACCUGUGGGCUGU<br>GAGCACUGAAGGGGGUUGCACAGUG                                                             |

|                         |                                    |    |            |      |    |                                                                                                                                                |
|-------------------------|------------------------------------|----|------------|------|----|------------------------------------------------------------------------------------------------------------------------------------------------|
| ex3_48<br>44496_<br>x20 | ENST0<br>000036<br>4089.1          | 30 | ####<br>## | 60   | 20 | TCCAGCGGTTGTCAGCTATCCAGGCTCATGTGGTGCCTGTGATGGTGTACTACTGTT<br>GGA                                                                               |
| ex3_48<br>47276_<br>x20 | AJ6094<br>67.1/1-<br>135           | 29 | 2E-11      | 58   | 20 | AGCACUAUAUUUAAACCUGUGGAUGGGAAUAUUCCCCAUUCUUGGUUACGCUGUA<br>GUGCAAAGAAUUCCUGGCUCUCUGUUGCACAGCUGACUUGUGCCAUUCUGCUG<br>UUGCUGUAUAGAGUUAAGGAACAUGG |
| ex3_48<br>52496_<br>x19 | ENST0<br>000038<br>4342.2          | 23 | 4E-08      | 46.1 | 19 | CCCTTGGCCCTTATCGAAGCTGCAGCTGCTTCCGCATAGCTGCTGTGGTCAAAAAGG<br>AGC                                                                               |
| ex3_48<br>53560_<br>x19 | AJ0077<br>33.1/1-<br>97            | 22 | 1E-07      | 44.1 | 19 | AUGCGAUGAUGAGUGAAGUAGAGCCUGACCUGGUUAUUGCCAUUGCUUCACUGUU<br>GGCUUUGACCAGGGUAUGAUCUCUUAUCUUCUCUCUGAGCUG                                          |
| ex3_48<br>58766_<br>x19 | ENST0<br>000036<br>4849.1          | 24 | 1E-08      | 48.1 | 19 | GCTGGCACAATGATGACTTAAATTACTTTTTGCCGTTTACCCAGCTGAGGTTGTCTTT<br>GA                                                                               |
| ex3_48<br>58861_<br>x19 | ENST0<br>000060<br>7313.1          | 36 | 1E-15      | 71.9 | 19 | CTGCGATGATGGCATTCTTAGGACACCTTTGGATTAATAATGAAAACAACACTACTCTC<br>TG                                                                              |
| ex3_48<br>60020_<br>x19 | AC092<br>123.4/2<br>4307-<br>24224 | 23 | 4E-08      | 46.1 | 19 | UGAUGACAUUCUCCGGAAUCGCUGUACGGCCUUGAUGAAAGCACAUUUGAACCCU<br>UUUCCAUCUGAUUGCUGAGGCUUUUAUC                                                        |
| ex3_48<br>63687_<br>x19 | AJ2240<br>23.1/1-<br>67            | 31 | 1E-12      | 61.9 | 19 | GUGCAUAUGAUGGAAAAGUUUUAUCUCCUGACACUUGUGAUGUCUUCAAAGGAA<br>CCACUGAUGCAC                                                                         |
| ex3_48<br>67031_<br>x19 | CM000<br>679.2/1<br>644003<br>6-   | 26 | ####<br>## | 52   | 19 | TGCTCTGATGAAATCACTAATAGGAAGTGCCGTCAGAAGCGATAACTGACGAAGACT<br>ACTCCTGTCTGATT                                                                    |

164401  
06

|                         |                                      |    |            |      |    |                                                                                                                                                  |
|-------------------------|--------------------------------------|----|------------|------|----|--------------------------------------------------------------------------------------------------------------------------------------------------|
| ex3_48<br>67981_<br>x19 | ENST0<br>000038<br>4252.1            | 27 | 2E-10      | 54   | 19 | GCTATGATGAATTTGATTGCATTGATCGTCTGACATGATAATGTATTTTTGTCCTCTAA<br>G                                                                                 |
| ex3_48<br>68779_<br>x19 | ENST0<br>000038<br>4384.1            | 23 | 4E-08      | 46.1 | 19 | GGGTCATTTCAAAGAGGGCTTATGAGGCTGTGAAACCCAGAGCTCTTAACGCTGTGA<br>CCA                                                                                 |
| ex3_48<br>74957_<br>x18 | AK025<br>846.1/2<br>178-<br>2094     | 25 | ####<br>## | 50.1 | 18 | UACUGUUAGUGAUGAUUUUAAAAUUAAAGCAGAUGGGAAUCUCUCUGAGAAAGAA<br>AAUGGAGAUUAAUCUUAACUGAAACAGUA                                                         |
| ex3_48<br>78377_<br>x18 | AC055<br>855.9/1<br>10736-<br>110601 | 22 | 2E-07      | 44.1 | 18 | GUGACUGUCCUGGUUUUGAUUGCAUUUGUUAGUUGUACAGUGCAACCAUAGACA<br>GUCACACACAUUAAAACAGAUGGUUCCUGCCGACAGGGUCUGUAUAGUUUAUCAGA<br>UUUUCUGUGCGAUGGCUCCAUACAUG |
| ex3_48<br>86819_<br>x18 | ENST0<br>000057<br>8179.1            | 18 | 3E-05      | 36.2 | 18 | GCAGACTCACTCTGCATCTGACTATACTTCCAGGCGGGTGCTTTTTTCTGTCTGCCAG<br>ATA                                                                                |
| ex3_48<br>86909_<br>x18 | ENST0<br>000038<br>4262.1            | 24 | 1E-08      | 48.1 | 18 | GTGCAATGATGTATTTTATTCAACACATCATTCTGAAAGAACGTGTGGAAAATAATG<br>AC                                                                                  |
| ex3_48<br>86981_<br>x18 | AJ6094<br>71.1/1-<br>132             | 38 | 1E-16      | 75.8 | 18 | GUUGAGGUCUAUCCCGAUGGGGCUUUUCCUGUAGCCUGCACAUUCGUUGGAAACG<br>CCUCAUAGAGUAACUCUGUGGUUUUACUUUACUCACAGGACUAUUGUUAGAUCUG<br>UGGGAAGGAAUUACAAGACAGUU    |

|                         |                                                  |    |            |      |    |                                                                                                                                                        |
|-------------------------|--------------------------------------------------|----|------------|------|----|--------------------------------------------------------------------------------------------------------------------------------------------------------|
| ex3_48<br>97027_<br>x17 | AC102<br>799.9/5<br>3508-<br>53611               | 37 | 4E-16      | 73.8 | 17 | UGGUCUCAAGGAAGGGAUGAUGUJCCAGUUGAGACUCAAGAAAAGGAUUCUGAGC<br>CUCAGAGCUUUGAAGGAGCCACUUGGUCCUGACCUUCCUAGAGGCAAA                                            |
| ex3_49<br>02841_<br>x17 | ENST0<br>000036<br>3548.1                        | 24 | 1E-08      | 48.1 | 17 | ATGCAGGTACTGTTACAATACTGATGTGTTTTGTTGTCGTTCCCCCTGCTTAAAG<br>CA                                                                                          |
| ex3_49<br>05323_<br>x17 | ENST0<br>000039<br>1305.1                        | 26 | 8E-10      | 52   | 17 | GCCGAGACTAGAGTCACATCCTGACACAACCTTTGTCCTGGTGTGCTAGAGTACTCG<br>AAG                                                                                       |
| ex3_49<br>06003_<br>x17 | AC079<br>951.35/<br>128361<br>-<br>128226        | 16 | 0.000<br>5 | 32.2 | 17 | UUGGCCUGAAUCAAGGCCAGCAGUUUGCUGAAGCUGUUGGUUUC AAGCAGGAG<br>CCUAAAAGAAUUGUCUUUCUAUGGUCUGUUGGCCAUUUCAUAACUUUGGAAAUGUA<br>AUGGUCAAUUCAUUAGAAAGAAACAUG      |
| ex3_49<br>10702_<br>x16 | AJ6094<br>83.1/1-<br>129                         | 30 | ####<br>## | 60   | 16 | ACUGGAGGACUAAGAAGGCUGAGUCUGAUGAAGUAAGACUUUGCUGAUACAUUCC<br>UCCUAGAAAAAAGGUUGGAGAGAGCAGCCUUCACUGAAGAGUAUCACAGGGCUG<br>ACUGUACUACCCAACACUC               |
| ex3_49<br>12190_<br>x16 | ENST0<br>000039<br>1002.1                        | 33 | ####<br>## | 58   | 16 | GCCTTTGCAGCTGATGATACAGCTTCTTTCCCATCAGATCGACCCTGTTGATCTCTA<br>CA                                                                                        |
| ex3_49<br>14062_<br>x16 | CM000<br>676.2/6<br>347927<br>2-<br>634794<br>13 | 14 | 0.008      | 28.2 | 16 | GGCCTCTCTCCCATGGTGCTGTGGGTGGGGGAGGAGGGGTGCTTTTCTCCTCAGCG<br>AAGACTGGAGGCAGACATCACCCCTCAAGGATCATCCTCAGAACTGCCACGTGCTG<br>GACAGCCTTGTTTTTCTACCTCACACATTT |

|                         |                                                |    |            |      |    |                                                                                                                                                   |
|-------------------------|------------------------------------------------|----|------------|------|----|---------------------------------------------------------------------------------------------------------------------------------------------------|
| ex3_49<br>18926_<br>x16 | GL000<br>250.2/2<br>868998<br>-<br>286892<br>3 | 42 | 5E-19      | 83.8 | 16 | GCCAAATGATGTTTATTTGAAACAGGAGCACCTCAGTGCAAGGACGACTCTTATCTAT<br>CACCCATGACTGATGGCT                                                                  |
| ex3_49<br>22414_<br>x16 | ENST0<br>000036<br>3664.1                      | 30 | 4E-12      | 60   | 16 | AAGCCAGCCAATGAATCTGCTTACCTGATTGTGTTTGTGCAGACATACTTTAAAAACT<br>GG                                                                                  |
| ex3_49<br>22782_<br>x16 | ENST0<br>000040<br>8314.1                      | 29 | 2E-11      | 58   | 16 | GGGCCTCCATGATGTCCAGCACTGGGCTCCGACTGCCACTGAGGACACGGTGCCC<br>CCCGG                                                                                  |
| ex3_49<br>23758_<br>x16 | AC013<br>416.4/5<br>5441-<br>55577             | 22 | ####<br>## | 44.1 | 16 | UGCAGUCAAGUCAAAUUCAGUGCCCGUUUCUGUCAUAGCGGGGGCUGGCCCAGA<br>UGGCUGCCACAGCAAGCUCCACAGCUCAUGGGCCCUGGGUCACCUACCCUGGGA<br>CCUGGGGAUAAGUUUGGCUGUGGACAGUG |
| ex3_49<br>25102_<br>x16 | ENST0<br>000063<br>7869.1                      | 15 | ####<br>## | 30.2 | 16 | TTTATTATTATTGTTGTTGTTATTTTGGAGTAGGACTCTCACTGTGTTGGCCAGGCTGG<br>AG                                                                                 |
| ex3_49<br>26926_<br>x16 | ENST0<br>000051<br>6978.2                      | 19 | 8E-06      | 38.2 | 16 | GAGAAATGATGAGGGTCAACATTCTTCATACCAAAGTGAAGACATGAGATCCAACCTC<br>TGA                                                                                 |
| ex3_49<br>28126_<br>x16 | AJ6094<br>80.1/1-<br>137                       | 21 | 5E-07      | 42.1 | 16 | GAGCACCUGAAUCUUUCCAUUCCUUGCUGCCUCGUGCCGGUGUGGGGACAGAU<br>GGUGCUACAGAAUGAGCAGAGGAAAUCCAGACAGGUUGUUUCCAUUUGUCUUGG<br>GGCCUGUCUCUACAGCUCUGCCACAUUU   |

|                         |                                                    |    |            |      |    |                                                                                                                                             |
|-------------------------|----------------------------------------------------|----|------------|------|----|---------------------------------------------------------------------------------------------------------------------------------------------|
| ex3_49<br>30498_<br>x15 | CM000<br>684.2/3<br>931530<br>7-<br>393152<br>13   | 41 | 2E-18      | 81.8 | 15 | GCTGTTCGTTGATGAGGCTCAGAGTGAGCGCTGGGTACAGCGCCCGAATCGGACAG<br>TGTAGAACCATTCTCTACTGCCTTCCTTCTGAGAACAGC                                         |
| ex3_49<br>30903_<br>x15 | CM000<br>671.2/1<br>274486<br>30-<br>127448<br>501 | 32 | 3E-13      | 63.9 | 15 | CCCGCCACTGCACCTGACCAGGTCTCTGTTGGCTGGTGCAATCCAGTGGTGAGCTG<br>ATAGTAAACCCCAGCTTAGGAAACAGGGTTGTTCTTCATGTGGATGACTCTGTGCCG<br>AAAGCATGGGAACAGCC  |
| ex3_49<br>31293_<br>x15 | AJ6094<br>85.1/1-<br>127                           | 22 | 1E-07      | 44.1 | 15 | CUGGAGACUAAGAAAAUAGAGUCCUUGAAAUCAAGCUGACUCUGCUUUUAGCCUC<br>CUAAAUGAAAAGGUAGAUAGAACAGGUCUUGUUUGCAAAAUAAAUUCAAGACCUAC<br>UUAUCUACCAACAGCA     |
| ex3_49<br>32478_<br>x15 | ENST0<br>000038<br>3885.1                          | 23 | 4E-08      | 46.1 | 15 | TAGGCCCTGAATCAAGACCAATGGTTTGCTGTAGCTGTTGGTTTCAAACAGGAGCTA<br>AGA                                                                            |
| ex3_49<br>34638_<br>x15 | AJ6094<br>66.1/1-<br>132                           | 23 | ####<br>## | 46.1 | 15 | CAGCAUGUUUCCAAGGGCUGUGGCUGGUCAUAGCCAUGGGAUCUCCAACUGCAU<br>GCAAGAGCAACCUGGAAAGACUUUGACAGCGCAGGUCAGUACAAUACCUGCAAGC<br>UGCCACUCAGCUUCCUAUAAUG |
| ex3_49<br>45813_<br>x15 | CM000<br>670.2/9<br>931823<br>-<br>993172<br>0     | 14 | 0.008      | 28.2 | 15 | GTCCTTTTGTGGTTCATAAGCATGATGATTGGGTTTTTCAGGCCGATTGTGTGAGATGTG<br>CCTCATTGAAACCTTGTTACGATGTCTGCCATTACCCATCTGATG                               |

|                         |                                                  |    |            |      |    |                                                                                                                                               |
|-------------------------|--------------------------------------------------|----|------------|------|----|-----------------------------------------------------------------------------------------------------------------------------------------------|
| ex3_49<br>51861_<br>x14 | ENST0<br>000062<br>6886.1                        | 24 | 1E-08      | 48.1 | 14 | GCTGTCCTGGACCTGTTGGCACCACAGACAGTTGCTCTGCTGTGCCTGTGGCCTCG<br>GGGC                                                                              |
| ex3_49<br>54829_<br>x14 | D8801<br>0.1/291<br>9-3009                       | 21 | 5E-07      | 42.1 | 14 | UCACUAUGAUGAUUGGUUGCCAGACAUUCGCAGUUUCCACCAGAAAUGUUUUUCC<br>UUAUGUUGGCCAGUUCUUCUUGGAUGUCUGAGUGA                                                |
| ex3_49<br>59589_<br>x14 | AL121<br>809.6/1<br>72081-<br>172016             | 21 | ####<br>## | 42.1 | 14 | CUGUGAUGAUGGCAUUUCUUAGGACAAUUUUGGAUUAAUUUAUGAAAACAACUACU<br>CUCUGAGCAAU                                                                       |
| ex3_49<br>62165_<br>x14 | ENST0<br>000039<br>1145.1                        | 34 | 2E-14      | 67.9 | 14 | TTATAAGTTTTCTAAGTGTCTAATGATGAATTTTCATAGGGCAGATTCTGAGGTGAAAAT<br>T                                                                             |
| ex3_49<br>62767_<br>x14 | CM000<br>663.2/7<br>578788<br>9-<br>757879<br>72 | 30 | 4E-12      | 60   | 14 | GGTCAATGATGTGTTGGCATGTATTATCTGAATCTATTGCTGATGTGTAATAACACTTT<br>AGCTCTAGAATTACTCTGAGACCTT                                                      |
| ex3_49<br>63649_<br>x14 | ENST0<br>000039<br>1100.1                        | 24 | 3E-06      | 40.1 | 14 | TCCAGCAGTAGTCAGCCATCCGGACAGAACCGTTCCTGTGATGGTGTTACTGCTG<br>GGA                                                                                |
| ex3_49<br>66785_<br>x14 | AC006<br>064.10/<br>138690<br>-<br>138555        | 34 | 2E-14      | 67.9 | 14 | UUGUCCUGGCCUAUUUUUCUGCUCCCCUGUGCUCAGUUCUAACAGGGUAGUCUG<br>GCAGGACACACAGCAAUCCUCUCAGUUUAGGAGGGCCGUCCUAAGAAUAGGGC<br>UGGCUCUUAAGGCACGAGAGGACAAU |
| ex3_49<br>69277_<br>x14 | AC064<br>836.7/3<br>1785-<br>31868               | 28 | 6E-11      | 56   | 14 | GUGUCAAUGAUGAUUUUCUAUUUGUUUGCCUGAUUUCCUUUUGGAUAAUGAAGGC<br>AUCUUUAGUCACUACCUCUUCUGAGACAC                                                      |

|                         |                                    |    |            |      |    |                                                                                                                                                       |
|-------------------------|------------------------------------|----|------------|------|----|-------------------------------------------------------------------------------------------------------------------------------------------------------|
| ex3_49<br>70103_<br>x14 | AJ6094<br>54.1/1-<br>139           | 32 | ####<br>## | 63.9 | 14 | UGCACUGCAUGGUAUCUGCACUCAGCAGUUUACACCUAGCUAGGGUGUUCAAAGGU<br>CAGUGCUAUAGAAAUUCAGUAUCUGGCAUCGUUGGUUUUCUUGGCUUUGUGCUU<br>GUUAAACCUAGGUAUUUCUACUGAUACAGUA |
| ex3_49<br>71461_<br>x14 | AB020<br>236.1/2<br>404-<br>2533   | 22 | 1E-07      | 44.1 | 14 | AUCGAGGCUAGAGUCACGCUUGGGUAUCGGCUAUUGCCUGAGUGUGCUAGAGUC<br>CUCGAAGAGUAAACUGCUGACCUUAUUCACUGGCUUGGGCCUUAUGGCACAGUCA<br>GUCACCAGGUUAGAGACAUGC            |
| ex3_49<br>71629_<br>x14 | ENST0<br>000039<br>1150.1          | 21 | 5E-07      | 42.1 | 14 | AATGTGAAGCAAATGATGATAAACTGGATCTGACTGACTGTGCTGAGTCTGTTCAATC<br>CA                                                                                      |
| ex3_49<br>71965_<br>x14 | AB061<br>824.1/4<br>441-<br>4504   | 20 | ####<br>## | 40.1 | 14 | UUGCUGUGAUGACUAUCUUAAGGACACCUUUGGAAUAACUAUGAAAGAAAACUAAU<br>CUGAGCAAC                                                                                 |
| ex3_49<br>74525_<br>x13 | AJ5433<br>24.1/2-<br>73            | 34 | ####<br>## | 67.9 | 13 | ACAAGCCUAUGAUGGUUAGUUAUCCUGUCUGAAAAUCUGGACUGAGGGAAAUAA<br>UCUAUUCUGAGGCUAA                                                                            |
| ex3_49<br>75318_<br>x13 | ENST0<br>000038<br>4170.1          | 26 | 8E-10      | 52   | 13 | TAGCAAGCCTCCAGCGTGCTTGGGTCTGCAGTGACCCCGTGGATTCCTACAGGGCT<br>TGCC                                                                                      |
| ex3_49<br>78711_<br>x13 | AC106<br>804.4/7<br>4513-<br>74420 | 24 | ####<br>## | 48.1 | 13 | CAGCCUGAAAUGAUGACUCUUUAAAAUUUCAUGUCUCUUCUCUGACAUUUUUC<br>UCUGGACACAGUUUUUGCCUUAUGAAUCUGAUCAGGCUG                                                      |
| ex3_49<br>79179_<br>x13 | ENST0<br>000057<br>9969.1          | 51 | 3E-05      | 38.2 | 13 | ATGCTATGATGACATCCATATGGTTTTGCTGCTGGCTGAGTTTCAGAGATGACACCTT<br>TC                                                                                      |

|                         |                                                    |    |            |      |    |                                                                                                                                                |
|-------------------------|----------------------------------------------------|----|------------|------|----|------------------------------------------------------------------------------------------------------------------------------------------------|
| ex3_49<br>88539_<br>x13 | ENST0<br>000036<br>4646.1                          | 24 | 1E-08      | 48.1 | 13 | GCCCTCCTGGTGCTTACCACAGGCTGTGTTCTTACACTGACTGTATAGAATGAGAAG<br>GTA                                                                               |
| ex3_49<br>88552_<br>x13 | AK095<br>288.1/7<br>48-880                         | 22 | 1E-07      | 44.1 | 13 | CCCCUUUUAAAAGCACUCAAUUGGGCCUGUGGCUAAUGACCUAUUGAGCCGUCAA<br>GAAAGGGGAGAGUGAAAACAUCGCUUUUGGGUGAAGUGGCAACAUGUGUUGUUU<br>GCUUCAAUUCGGUGGUGUGACAAGG |
| ex3_49<br>89319_<br>x13 | ENST0<br>000036<br>3450.1                          | 34 | ####<br>## | 67.9 | 13 | AAGCAGGATTCAGACTACAATATAGCTGCTAAGTGCTGTGTTGTCGTTCCCCCTGCT<br>TAA                                                                               |
| ex3_49<br>89579_<br>x13 | AC016<br>868.8/2<br>1258-<br>21186                 | 24 | 0.000<br>6 | 32.2 | 13 | GUGUGAUGAAAUCACCCCAAUAGCUGGAAUUACCAGCAGAUUGUGUAGUGGUGA<br>ACCUACAUUUUUCUGAAG                                                                   |
| ex3_49<br>93752_<br>x13 | ENST0<br>000038<br>4334.1                          | 18 | 3E-05      | 36.2 | 13 | GCATGGCTGAATACTGTGTTCTTTTATCAGTAGTTTACACAGCCAGACACCATGCAAA<br>AG                                                                               |
| ex3_49<br>94961_<br>x13 | CM000<br>673.2/1<br>230589<br>95-<br>123058<br>909 | 25 | 7E-07      | 42.1 | 13 | TCGCTATGATGATGGATTCCAAAACCATTCGTAGTTTCCACCAGAAAGTCTTATGTTG<br>GCCAGTTCCTTCCTTGGATGTTTGAGCGA                                                    |
| ex3_50<br>00185_<br>x12 | ENST0<br>000036<br>4953.1                          | 25 | 3E-09      | 50.1 | 12 | AGTGATGATGACCCCAGGTA ACTCTTGAGTGTGTCGCTGATGCCATCACCGCAGCG<br>CTCT                                                                              |
| ex3_50<br>03425_<br>x12 | AL355<br>075.6/1<br>93439-<br>193515               | 28 | 6E-11      | 56   | 12 | AGUUUGCCAUGAUGAAAUGCAUGUUAAGUCCGUGUUUCAGCUGAUCAGCCUGAUU<br>AAACACAUGCUCUGAGCAGACU                                                              |

|                         |                                                  |    |            |      |    |                                                                                                                                                                  |
|-------------------------|--------------------------------------------------|----|------------|------|----|------------------------------------------------------------------------------------------------------------------------------------------------------------------|
| ex3_50<br>05633_<br>x12 | ENST0<br>000036<br>3946.1                        | 25 | ####<br>## | 50.1 | 12 | TCCTCCTACAAAGGCGTGTCTGTGGTTCCTGTCTTTGGACACGTAAGAATTGGAGG<br>AAA                                                                                                  |
| ex3_50<br>17825_<br>x12 | ENST0<br>000038<br>4416.1                        | 20 | 2E-06      | 40.1 | 12 | GTTGAGGTCTATCCCGATGGGGCTTTTCCTGTAGCCTGCACATCGTTGGAAACGCCT<br>CAT                                                                                                 |
| ex3_50<br>18725_<br>x12 | ENST0<br>000040<br>8716.1                        | 35 | 6E-15      | 69.9 | 12 | GCAGACTCACTATGCACCTGACTGTACTTCCAGGCAGGTGCTTTTTCTGTCTGCCAG<br>AGA                                                                                                 |
| ex3_50<br>20117_<br>x12 | CM000<br>677.2/6<br>650291<br>0-<br>665028<br>12 | 28 | ####<br>## | 56   | 12 | TGCAATGATGTCGTAATTTGCGTCTTACTCTGTTCTCAGCGACAGTTGCCTGCTGTCA<br>GTAAGCTGGTACAGAAGGTTGACGAAAATTCTTACTGAGCA                                                          |
| ex3_50<br>20309_<br>x12 | AB028<br>893.1/4<br>087-<br>4152                 | 20 | 2E-06      | 40.1 | 12 | CGUCCAUGAUGUCCGCAACUACCUACAUUGUUUGAUCCUCAUGAAAGCAGCACU<br>GGCUGAGACGC                                                                                            |
| ex3_50<br>21461_<br>x12 | ENST0<br>000045<br>9174.1                        | 43 | 1E-19      | 85.7 | 12 | GGTGCAGATGATGACACTGTAAAGCGACCAAAGTCTGAACAAAGTGATTGGTACCTC<br>GTT                                                                                                 |
| ex3_50<br>21737_<br>x12 | ENST0<br>000036<br>4995.1                        | 38 | 1E-16      | 75.8 | 12 | AATCAATGATGAAACCTATCCCGAAGCTGATAACCTGAAGAAAAATAAGTACGGATTC<br>GG                                                                                                 |
| ex3_50<br>22553_<br>x12 | U4390<br>1.2/401<br>1-4161                       | 21 | 5E-07      | 42.1 | 12 | GCUGCACACUAUUAAAGCUCAGGGUGGAGGCCAGUCUUGGCUCAUGAACUUCUGA<br>GUGUCGGAAGUGUGCUAUUAUCAAUGGCAGGAUUUUCGCUAACACCAGUAGAGCUU<br>GCCUCUAUGACUGGAGUUUGGUAGUACUCGCUGCCACAUAG |

|                         |                                                    |    |            |      |    |                                                                                                                                                                                                                 |
|-------------------------|----------------------------------------------------|----|------------|------|----|-----------------------------------------------------------------------------------------------------------------------------------------------------------------------------------------------------------------|
| ex3_50<br>27872_<br>x11 | AC018<br>761.6/5<br>1237-<br>51168                 | 28 | 6E-11      | 56   | 11 | UGGGAAGUGAUGACACCCUGUGACUGUUGAUGUGGAACUGAUUUUAUCGCGUAUUC<br>GUACUGGCUGAUCCUG                                                                                                                                    |
| ex3_50<br>27883_<br>x11 | ENST0<br>000038<br>4423.1                          | 21 | 5E-07      | 42.1 | 11 | ATCCAAGGTGATTCCCTCTCCAAGGGGACATCAGTGCCTCTCAGGAAAGTAGCAGCT<br>TGG                                                                                                                                                |
| ex3_50<br>28994_<br>x11 | ENST0<br>000036<br>5128.1                          | 14 | ####<br>## | 28.2 | 11 | GCTGTAATGTGTGCATAGGTTTCATCTGTGTCTGGTAGCAGTGTCTGTCTGTGTTTT<br>CA                                                                                                                                                 |
| ex3_50<br>30985_<br>x11 | ENST0<br>000038<br>4215.1                          | 33 | ####<br>## | 65.9 | 11 | TAGCAAGCCTCCAGCGTGCTTGGGTCTGCGGTGACCCTATGCATTCCTTCAGTGCTT<br>GCT                                                                                                                                                |
| ex3_50<br>32635_<br>x11 | CM000<br>667.2/1<br>392787<br>81-<br>139278<br>978 | 37 | 4E-16      | 73.8 | 11 | TCCAGCGGTTGTCAGCTATCCAGGCTCATGTGGTGCCTGTGATGGTGTACACTGTT<br>GGAAGAGCAAACACTGTCTTTATTGAGGTTTGGCTCCAAGCACTGTTTTGGTGTGTA<br>GCTGAGTACCTTTGGGCAGTGTTTTGCACCTCTGAGAGTGAATGACTCCTGTGGAG<br>TTGATCCTAGTCTGGGTGCAAACAAT |
| ex3_50<br>35066_<br>x11 | ENST0<br>000038<br>8090.1                          | 23 | 4E-08      | 46.1 | 11 | TGCACTTATGTATGTTTTTGTTTAACGTGGACAAAGACTTACAGATAGGTGCAAAAA<br>TA                                                                                                                                                 |
| ex3_50<br>48629_<br>x11 | ENST0<br>000045<br>9155.1                          | 24 | 1E-08      | 48.1 | 11 | CAGGCTGATGAGACTAAGGCGAATGCGACTCCGTGCTCTCTGGCCCTTGGCTCCTT<br>GTTG                                                                                                                                                |

|                         |                                                  |    |            |      |    |                                                                                                                                                                                                                    |
|-------------------------|--------------------------------------------------|----|------------|------|----|--------------------------------------------------------------------------------------------------------------------------------------------------------------------------------------------------------------------|
| ex3_50<br>51308_<br>x10 | L07383<br>.1/1-<br>153                           | 30 | 4E-12      | 60   | 10 | UGUGCACAUUGUUAGAGCUUGGAGUUAGAGGCUACUGACUGGCCGAUGAACUCGC<br>AAGUGUAGGUAGUGUGCUACAUGAGGGGCAAGUUUCGCUAACACCACAAGGGUC<br>UCUGGCCCAAUGAGUGGAGUUUGAUAGUAAUUCUUGCUACAAGU                                                  |
| ex3_50<br>51988_<br>x10 | ENST0<br>000045<br>9577.1                        | 30 | 4E-12      | 60   | 10 | TGGTCTCAAGGAAGGGATGATGTTCCAGTTGAGACTCAAGAAAAGGATTCTGAGCCT<br>CAG                                                                                                                                                   |
| ex3_50<br>53918_<br>x10 | ENST0<br>000041<br>3522.1                        | 26 | 8E-10      | 52   | 10 | CCACAATGATGGCAATATTTTTTCGTCAACAGCAGTTCACCTAGTGAGTGTTGAGACTC<br>TG                                                                                                                                                  |
| ex3_50<br>54028_<br>x10 | ENST0<br>000036<br>2803.1                        | 20 | 2E-06      | 40.1 | 10 | TGCAATGATGTCGTAATTTGCGTCTTACTCTGTTCTCAGCGACAGTTGCCTGCTGTCA<br>GT                                                                                                                                                   |
| ex3_50<br>55098_<br>x10 | CM000<br>666.2/5<br>414726<br>4-<br>541474<br>61 | 22 | 0.009      | 28.2 | 10 | AAGACTCTACTTCCAGGTATAATTTCTATGGTTTATTACTGGAAAAGTTTCTCTAAATA<br>TGTGGATCGCTGGAAATAAGAGGAAGCACAGGGTTCTCCGAGTGAAGCTGGCTTTT<br>GGAATTACTTGGCTGCAACTGTCATTTGCTACTTTAAGATTTTACTTATTGATTTTTTTT<br>TTTGAGACAGAGTCTCACTCTGT |
| ex3_50<br>57008_<br>x10 | AF250<br>841.1/2<br>261-<br>2352                 | 21 | 5E-07      | 42.1 | 10 | GGAUCGAUGAUGACUUCCAUAUGUACAUUCUUGGAAAGCUGAACAAAAUGAGUG<br>AAAACUCUAUACCGUCAUCCUCGUCGAACUGAGGUCC                                                                                                                    |
| ex3_50<br>59798_<br>x10 | ENST0<br>000038<br>6062.1                        | 25 | ####<br>## | 50.1 | 10 | AATAAGTGATGAAAAAAGTTTCGGTCCCAGATGATGGCCAGTGATAACAACATTTTTTC<br>TG                                                                                                                                                  |

|                         |                                  |    |            |      |    |                                                                                                                                             |
|-------------------------|----------------------------------|----|------------|------|----|---------------------------------------------------------------------------------------------------------------------------------------------|
| ex3_50<br>62638_<br>x10 | ENST0<br>000038<br>6745.1        | 23 | 4E-08      | 46.1 | 10 | GCTGTTCAGTGATGAGGCCTGGAATGTGCGCTGGGCACAGCGCCCGAGACAGACT<br>GCGGA                                                                            |
| ex3_50<br>62938_<br>x10 | ENST0<br>000038<br>3870.1        | 40 | 7E-18      | 79.8 | 10 | CCTCCTTTTCTTGGCGGGGATCGGGCTTGTGGTGCCGCTCCCCGTAATGTACGGAG<br>GAAG                                                                            |
| ex3_50<br>63198_<br>x10 | AJ6094<br>77.1/1-<br>132         | 30 | ####<br>## | 60   | 10 | GGCCUCCUGGUGCUUACCACAGGCUGUGUUCUUACACUGACUGUAUAGAAAGAG<br>GAGGUAGAGUAAACCUACCCCAUUAUACACCUCAGCUCAGGCCUUGCCUGGUCU<br>GUAUUGUGAAUGGGGGAACAUAG |
| ex3_50<br>64198_<br>x10 | ENST0<br>000040<br>8454.1        | 31 | 1E-12      | 61.9 | 10 | GGGACCCCGTGATGTCCAGCACTGGGCTCTGACTGCCCTGAGGACACGGTGCAC<br>CCCGG                                                                             |
| ex3_50<br>68968_<br>x10 | ENST0<br>000038<br>4356.1        | 20 | 2E-06      | 40.1 | 10 | CTGTGAATATTCTCGCTGTTCTGATTTTGTATAATCACGATGGGCTAACATTCGCA<br>AT                                                                              |
| ex3_50<br>69588_<br>x10 | ENST0<br>000038<br>4033.1        | 34 | 2E-14      | 67.9 | 10 | GCTGCACACTATTAAAGCTCAGGGTGGAGGCCAGTCTTGGCTCATGAACTTCTGAGT<br>GTC                                                                            |
| ex3_50<br>69998_<br>x10 | ENST0<br>000051<br>6231.1        | 30 | 1E-04      | 36.2 | 10 | TGAGATGAGATCATGCCATTGCACTCCAGCCTGGACGACAGAGCGAGACTTCATCTC<br>AAA                                                                            |
| ex3_50<br>70598_<br>x10 | AB028<br>893.1/3<br>145-<br>3226 | 35 | 5E-15      | 69.9 | 10 | AGGUCAGUGAUGAGCAACAUUCACCAUCUUUCGUUUGAGUCUCACGGCCAUGAGA<br>UCAACCCCAUGCACCGCUCUGAGACCU                                                      |
| ex3_50<br>71048_<br>x10 | ENST0<br>000038<br>4360.1        | 25 | 3E-09      | 50.1 | 10 | GACCTCCTGGGATCGCATCTGGAGACTGCCTAGTATTCTGCCAGCTTCGGAAAGGG<br>AGGG                                                                            |

|                         |                                                    |    |            |      |    |                                                                                                                                                                                                                 |
|-------------------------|----------------------------------------------------|----|------------|------|----|-----------------------------------------------------------------------------------------------------------------------------------------------------------------------------------------------------------------|
| ex3_50<br>72938_<br>x10 | BL000<br>002.1/9<br>801851<br>9-<br>980187<br>14   | 30 | ####<br>## | 60   | 10 | AGAGAAGCAAAGUGAUGAGUAAUACUGGCUGGAGCCCCAAAGAGGCACGUGUGUG<br>UGUUUGUGUGUGUGUGUAUAUGCUUGUCAGUGCAUGCACGUGUAUGUCUGGGAG<br>UACAAAUGGGUGCGACUGGUUGUAGGGAACUAGCUAUGUGCCUUCUAUUAGGCC<br>AUGACAGUCAAACUGAUAGAUCUGAUUGCUUC |
| ex3_50<br>73588_<br>x10 | CM000<br>663.2/2<br>202006<br>76-<br>220200<br>546 | 23 | 4E-08      | 46.1 | 10 | TTCCAAAGTGTTAAGTTCAGTTCAGGGTAGCTTCCCTGCTCTGTTAATTAACCTTTGG<br>AACATTGAACTGGCTAGGGAAAATGATTGGATAGAACTATTATTCTATTCATTTATC<br>CCCAGCCTACAAAA                                                                       |
| ex3_50<br>73928_<br>x10 | ENST0<br>000038<br>3953.1                          | 20 | 2E-06      | 40.1 | 10 | GCTGAATGATGATATCCCCTAACTGAGCAGTCAGTAGTTGGTCCCTTTGGTTGCATAT<br>GA                                                                                                                                                |
| ex3_50<br>75628_<br>x10 | CM000<br>677.2/6<br>434256<br>6-<br>643426<br>98   | 14 | 0.009      | 28.2 | 10 | TGTTACTCTCTAGCTTAAGAACCCTTTAATGTGGTGATGTCCATCTCATGTCATCCAGG<br>GATAAAGCAACCCTTGTTTATCCCATCTTGGCTCTTGGTCTGTGCCCATGGCTGGTT<br>CGTGCCTTGGATACATGG                                                                  |
| ex3_50<br>77258_<br>x10 | ENST0<br>000036<br>2541.1                          | 22 | 1E-07      | 44.1 | 10 | TCTTAGTGACATAATTCTAATAGTTTGTTCGACCTTCCACTGTGGACTCAATAGCAG<br>GG                                                                                                                                                 |
| ex3_50<br>78736_<br>x9  | AL132<br>709.5/1<br>55570-<br>155499               | 33 | ####<br>## | 65.9 | 9  | UGGAUCGAUGAUGACUGCUGGUGGCGUAUGAGUCUJACAUGAUGAAUACGUGUC<br>UGGAACUCUGAGGUCCAU                                                                                                                                    |
| ex3_50<br>82174_<br>x9  | ENST0<br>000038<br>4583.1                          | 43 | 1E-19      | 85.7 | 9  | TTGGCCCTGAATCAAGGCCAGCAGTTTGTGAAGCTGTTGGTTTCAAGCAGGAGCCT<br>AAA                                                                                                                                                 |

|                        |                                                  |    |            |      |   |                                                                                                                                                          |
|------------------------|--------------------------------------------------|----|------------|------|---|----------------------------------------------------------------------------------------------------------------------------------------------------------|
| ex3_50<br>85927_<br>x9 | CM000<br>673.2/7<br>540442<br>1-<br>754045<br>66 | 21 | 5E-07      | 42.1 | 9 | CTTCAGTGATGACACGATGACGAGTCAGAAAGGTCACGTCCTGCTCTTGGTCCTTGT<br>CAGTGCCATGTTCTGTGGTGTGTGCACGAGTTCCTTTGGCAGAAGTGTCTATTTA<br>TTGATCGATTTAGAGGCATTTGTCTGAGAAGG |
| ex3_50<br>86287_<br>x9 | ENST0<br>000038<br>4437.1                        | 28 | 6E-11      | 56   | 9 | ATTGCACCTAAACCCAAGAATCACTGTTTCTTATAGCGGTGGTTTAAACAGAGGTGCA<br>AA                                                                                         |
| ex3_50<br>86944_<br>x9 | CM000<br>675.2/4<br>533644<br>7-<br>453363<br>14 | 22 | 1E-07      | 44.1 | 9 | ATGCATCTATTTGACAGACCTGGAGCAGTTGCTATCTGCTGCTATGGTTTCCACCACA<br>GATGCAAGAAGAACATGTCCTTGCGCTTCCGTCTGTCTAATTGTGGCAGCTGAGAT<br>TGAATAGAGGAATACAGGA            |
| ex3_50<br>88519_<br>x9 | ENST0<br>000036<br>4968.1                        | 24 | ####<br>## | 48.1 | 9 | ACAAGCCTATGATGGTTAGTTATCCCTGTCTGAAAATCTGGACTGAGGGAAATAATCT<br>AT                                                                                         |
| ex3_50<br>93037_<br>x9 | AC020<br>931.6/9<br>5709-<br>95787               | 15 | 0.002      | 30.2 | 9 | CCACAUGC GG CUGAUGACAGCACUUCUGCUGAGACGCUGUGAUUGCUCUGUCCA<br>AAGUAAACGCCUGACGCACUGUGG                                                                     |
| ex3_50<br>93235_<br>x9 | AB028<br>893.1/4<br>355-<br>4440                 | 31 | 1E-12      | 61.9 | 9 | GGCAGAUGAUGUCCUUAUCUCACGAUGGUCUGCGGAUGUCCCUGUGGGAAUGGC<br>GACAAUGCCAAUGGCUUAGCUGAUGCCAGGAG                                                               |
| ex3_51<br>00183_<br>x9 | AL132<br>709.5/1<br>75950-<br>175879             | 21 | ####<br>## | 42.1 | 9 | UGGAUCAAUGAUGAGUACCCUGGGGUGUCUGAAUCUUGGAUUUUGAUUAAACCCU<br>AUAACUCUGAGGUCCA                                                                              |
| ex3_51<br>05052_<br>x9 | ENST0<br>000036<br>2423.1                        | 21 | 5E-07      | 42.1 | 9 | CCCCTTTTAAAGCACTCAATGGGCCTGTGGCTAATGACCTATTGAGCCGTCAAGAA<br>AGG                                                                                          |

|                        |                                                    |    |            |      |   |                                                                                                                                                            |
|------------------------|----------------------------------------------------|----|------------|------|---|------------------------------------------------------------------------------------------------------------------------------------------------------------|
| ex3_51<br>08912_<br>x8 | AK090<br>585.1/1<br>147-<br>1282                   | 33 | 8E-14      | 65.9 | 8 | GCUGUCCUGGACCUGUUGGCACCACAGACAGUUGCUCUGCUGUGCCUGUGGCCU<br>CGGGCAAAGAGAAAGUGGCGAUUUCUACACUCAGUGCUCGGGAACCAGUGGGC<br>ACUGAGAAUGGUUUAUGGCCUGACAUA             |
| ex3_51<br>13544_<br>x8 | ENST0<br>000036<br>4915.1                          | 33 | 8E-14      | 65.9 | 8 | GCCAAATGATGTTTATTTGAAACAGGAGCACCTCAGTGCAAGGACGACTCTTATCTAT<br>CA                                                                                           |
| ex3_51<br>13880_<br>x8 | AJ6094<br>41.1/1-<br>130                           | 21 | 5E-07      | 42.1 | 8 | CUGCAUCCACUGAUAGACCUUGAACAAUUUACUGUUGUUCUUUUGGUUUGCACUA<br>GGAUGCAAAAAGAAAGAAUCCUGCGCUUUCUGUCUGUCUUUGUGGGCGGCCAGA<br>UUGAAUUGGGGAAUACAUCU                  |
| ex3_51<br>17992_<br>x8 | AJ6094<br>73.1/1-<br>130                           | 35 | 5E-15      | 69.9 | 8 | AAGCCAGCCAAUGAAUCUGCUUACCUGAUUGUGUUUGUGCAGACAUACUUUAAAA<br>ACUGGCAAUAGUAAAAGCCAUGUUACGAGCCUUAAGGACAUUGAAGUCGUUAAGGU<br>CCCUGAGAAUGGCUAUAACA                |
| ex3_51<br>18072_<br>x8 | CM000<br>673.2/7<br>540039<br>1-<br>754005<br>38   | 20 | 2E-06      | 40.1 | 8 | CTTCGATGAAGAGATGATGACGAGTCTGACTTGGGGATGTTCTCTTTGCCAGGTGG<br>CCTACTCTGTGCTGCGTTCTGTGGCACAGTTTAAAGAGCCCTGGTTGAAGTAATTC<br>CTAAAGATGACTTAGAGGCATTTGTCTGAGAAGG |
| ex3_51<br>20904_<br>x8 | CM000<br>663.2/1<br>791964<br>73-<br>179196<br>579 | 20 | 0.000<br>8 | 32.2 | 8 | ATCCAAGGTGATTCCTTCTCCAAGGGGGACATCCAGTGACCCTCTCAGGAAGTAGCA<br>ACTTGGAATAGAATAGTCCAGGAGTTCCAGGACCAGCCTGGCCAATATGG                                            |

|                        |                                                  |    |            |      |   |                                                                                                                                                                                                                                                                                                                                                                      |
|------------------------|--------------------------------------------------|----|------------|------|---|----------------------------------------------------------------------------------------------------------------------------------------------------------------------------------------------------------------------------------------------------------------------------------------------------------------------------------------------------------------------|
| ex3_51<br>21136_<br>x8 | AF308<br>283.1/1<br>-330                         | 25 | ####<br>## | 50.1 | 8 | GCCACAUGAUGAUUCAAGGCUGUUGUGAUUCAGUUGGUUUUGGCUAAGCCCAGG<br>GACCUUUUGGCCUGUUAAAAGGUCUGUAAUCUUGGUGGGCGAUACAGAGUUUAUGUG<br>UGUUCACUGUAAGGGCAGACCAACAAGAACUUUUUCCUACUUUUUGAGCUACCUCU<br>UUUUAUAGGGGUGAUUCUUCAGUUGCUGGAGAGAAAUUGUGGUAACUGGAGU<br>GAGAGAGUAGGAACAGGGCAUGUUCAGGGUAUCAGGGCCAAGGGUCCUAAAGGA<br>CUUAGCUUGUGUUAUGGCCACUGAGAGAUGAAACACAGAUCUUUGGUAAUCUGAU<br>GGCU |
| ex3_51<br>21720_<br>x8 | AF001<br>689.1/3<br>146-<br>3209                 | 24 | 1E-08      | 48.1 | 8 | GGGGUAAUGAUGGAAAAUCAUUUAUUGGAAAAGAAUGACAUGAACAAAGGAACCAC<br>UGAAGUGC                                                                                                                                                                                                                                                                                                 |
| ex3_51<br>26008_<br>x8 | AF141<br>346.1/2<br>40-319                       | 37 | 4E-16      | 73.8 | 8 | GUGCCCUGCCUCUGAUGAAGCCUGUGUUGGUAGGGACAUCUGACAGUAAUGAUG<br>AAUGCCAACCGCUCUGAUGGUGGCAC                                                                                                                                                                                                                                                                                 |
| ex3_51<br>26224_<br>x8 | CM000<br>671.2/3<br>393437<br>6-<br>339342<br>96 | 25 | 3E-09      | 50.1 | 8 | CTGGAAAAGACAATGATGTTTTATTTCCAAGCACATATCTGAGTTGTATGTGTGGACA<br>GCACTGAGACTGAGTCTTTCCAC                                                                                                                                                                                                                                                                                |
| ex3_51<br>26616_<br>x8 | ENST0<br>000045<br>9579.1                        | 33 | ####<br>## | 65.9 | 8 | GCTCTGTGATGGAGCCCATGCGTGTCATCTGAGCCTCTGGCTTCCCTGCCAGTGCA<br>GCCC                                                                                                                                                                                                                                                                                                     |

|                        |                                                    |    |            |      |   |                                                                                                                                                     |
|------------------------|----------------------------------------------------|----|------------|------|---|-----------------------------------------------------------------------------------------------------------------------------------------------------|
| ex3_51<br>26648_<br>x8 | CM000<br>684.2/3<br>931391<br>1-<br>393138<br>19   | 41 | 2E-18      | 81.8 | 8 | GCTGTTCAGTGATGAGGCCTGGAATGTGCGCTGGGCACAGCGCCCGAGACAGACT<br>GCGGAACCGTTCCTTGTTGCCTTCCTTCTGAGAACAGC                                                   |
| ex3_51<br>27552_<br>x8 | ENST0<br>000045<br>9255.1                          | 35 | 5E-15      | 69.9 | 8 | GCCACATGATGATATCAAGGCTGTTGTGATTGAGTTGGTTTGGCTAAGCCCAGGGAC<br>CTT                                                                                    |
| ex3_51<br>28824_<br>x8 | ENST0<br>000040<br>8573.1                          | 33 | 0.000<br>5 | 34.2 | 8 | GCTGTACATGATGACAACCTGGCTCCCTCTACTGAACTGCCATGAGGAAACTGCCATG<br>TCA                                                                                   |
| ex3_51<br>34552_<br>x8 | CM000<br>671.2/3<br>395285<br>0-<br>339527<br>69   | 27 | 2E-10      | 54   | 8 | GTCCAGAAAACAATGATGTGGTAATTTCCAAGCACATATCTGATGATTCCATGTGGAA<br>TTTAACTACCTGAGTTTCCTGGAC                                                              |
| ex3_51<br>34840_<br>x8 | CM000<br>663.2/1<br>554216<br>5-<br>155423<br>04   | 19 | 0.006      | 30.2 | 8 | TGGCTCGGTTTCCTGGGGGGTGGGCTCAGTCTACACCACCTCCCCTCAGCCAAGCC<br>TACAGTAGAGGGCCCAGGCATCCTCCCGTATGGGAGAGGCGTTTGAGTAAGGAGCC<br>TCACCTGGGGTGTCTAGCCTCACATTT |
| ex3_51<br>36320_<br>x8 | CM000<br>671.2/1<br>314904<br>86-<br>131490<br>571 | 19 | 8E-06      | 38.2 | 8 | TCTCAGTGATGTAATTCCAATAGATCCTTCTGACCCTCCACTGTGGACTCAATAGCAG<br>GGAGATGAAGAGGACAGTGACTGAGAGA                                                          |
| ex3_51<br>36560_<br>x8 | CM000<br>679.2/8<br>329583<br>-<br>832971<br>9     | 21 | 5E-07      | 42.1 | 8 | AAAGCAAGCTGGAATTACAGTGCTTCATTTTGTGAAATACTAAATACCATCATTATGCT<br>GCTGAAAGAAAAGCTGTTTTAATGATTTTTGATTTGTCTTTGTGAGAGTAAATCACGA<br>CAGATTGACATGGACAATT    |

|                        |                                                    |    |            |      |   |                                                                                                                                                 |
|------------------------|----------------------------------------------------|----|------------|------|---|-------------------------------------------------------------------------------------------------------------------------------------------------|
| ex3_51<br>37120_<br>x8 | CM000<br>668.2/1<br>368558<br>31-<br>136855<br>698 | 14 | 0.009      | 28.2 | 8 | TACCCTCTTTCCACTTTGCCAACTGGATGTATGTCTTTACTGGTCATTCCAGTGGGGC<br>AAACGAAATATCCTTTTTAAACTCAGGCAAACCTGGGTGTTTGTTCATGGTCATGTATC<br>CTGTCAGAGAAAACAAAC |
| ex3_51<br>39400_<br>x8 | CM000<br>663.2/1<br>738663<br>68-<br>173866<br>301 | 24 | 1E-08      | 48.1 | 8 | ATACTATGATGGTTGCATAGTTTCAGCAGATTTAATCATGAAGAGATGTACTATCTGTC<br>TGATGTATCT                                                                       |
| ex3_51<br>42433_<br>x7 | ENST0<br>000036<br>3389.1                          | 27 | 2E-10      | 54   | 7 | GGCAGATGATGTCCTTATCTCACGATGGTCTGCGGATGTCCCTGTGGGAATGGCGA<br>CAAT                                                                                |
| ex3_51<br>42909_<br>x7 | CM000<br>681.2/1<br>786258<br>8-<br>178627<br>20   | 25 | 3E-09      | 50.1 | 7 | ATTGCACCTAAACCCAAGAATCACTGTTTCTTATAGCGGTGGTTTAAACAGAGGTGCA<br>AACAGCAAGCGGATCTTGTCGCCTTTGGGGGGCTGTGGCCGTGCCCTCAAAGTGA<br>ATTTGGAGGTTCCACAAC     |
| ex3_51<br>43784_<br>x7 | ENST0<br>000036<br>4804.2                          | 22 | 2E-07      | 44.1 | 7 | AAGACTATTTTCAAGGTTCAATTTCTATAGTTCACTACTGGAGAAGTTTCTCTGAACATG<br>T                                                                               |
| ex3_51<br>44568_<br>x7 | AC064<br>836.7/1<br>5165-<br>15252                 | 28 | ####<br>## | 56   | 7 | UUCGUUGUUGUCAAUGAUGUAUUCUUCUUGGAACUGAAUCUAAGUGAUCUGACUC<br>AAUAUUCGUCACUACCACUGAGACAACGAUGAA                                                    |
| ex3_51<br>46227_<br>x7 | ENST0<br>000036<br>2396.1                          | 29 | 2E-11      | 58   | 7 | ACCTGCATTCAAAAATGATCACGGGCTGCCTGTGCTCTGGTCATCAATAACGCAGGG<br>AGA                                                                                |

|                        |                                                  |    |            |      |   |                                                                                                                                                |
|------------------------|--------------------------------------------------|----|------------|------|---|------------------------------------------------------------------------------------------------------------------------------------------------|
| ex3_51<br>47298_<br>x7 | BC063<br>011.1/4<br>24-557                       | 26 | 8E-10      | 52   | 7 | ACUCUCUCGGCUCUGCAUAGUUGCACUUGGCUUCACCCGUGUGACUUUCGUAAC<br>GGGGAGAGAGAGAAAAGAUCUCCUCAGGACCUCGGAUGGGCCUUACUGUGGCCU<br>CUCUUUCCUUGAGGGGUGCAACAGGC |
| ex3_51<br>48964_<br>x7 | L07384<br>.1/2-<br>133                           | 22 | ####<br>## | 44.1 | 7 | AAGCAGGAUUCAGACUACAAUUAUAGCUGCUAAGUGCUGUGUUGUCGUUCCCCUG<br>CUUAAAAUAAAGUUGUUUCUUAACUUAUACCUGUCUGCUAUUCUCCUGUAGCAGCC<br>AGGGACGCUUGGUCUCAUCAU   |
| ex3_51<br>49069_<br>x7 | ENST0<br>000063<br>6377.1                        | 22 | 1E-07      | 44.1 | 7 | GAGTTATGATGTGTGTAATCCTATTCCATTGCTGAAATGCAGTGTGGAACACAATGA<br>AC                                                                                |
| ex3_51<br>53073_<br>x7 | CM000<br>677.2/2<br>507043<br>2-<br>250705<br>26 | 30 | 4E-12      | 60   | 7 | GGATCGATGATGAGTCCTCCAAAAAACATTCTTGAAAAGCTGAACAAAATGAGT<br>GAGAACTCATACCGTCGTTCTCATCGGAACTGAGGTCC                                               |
| ex3_51<br>54823_<br>x7 | ENST0<br>000058<br>5078.1                        | 21 | ####<br>## | 42.1 | 7 | GTGCTGTGATGATGCCTTAATATTGTGGTTTCGACTCACTGAGAGTAAAATGAGGAC<br>CTA                                                                               |
| ex3_51<br>68760_<br>x7 | AJ6094<br>26.1/1-<br>135                         | 23 | 4E-08      | 46.1 | 7 | UAGGCCUGAAUCAAGACCAAUGGUUUGCUGUAGCUGUUGGUUUCAAACAGGAGC<br>UAAGAGUGAUGUCUCCUUGUGGUCUGUUGGCUAUUCAGUAUCCAGUGCGAAU<br>UGCCAAUUCAGUUGGAAGAAACAUAG   |

|                 |                          |    |            |      |   |                                                                                                                                                            |
|-----------------|--------------------------|----|------------|------|---|------------------------------------------------------------------------------------------------------------------------------------------------------------|
| ex3_51_69551_x7 | AK128_061.1/3_770-3890   | 34 | 2E-14      | 67.9 | 7 | UGGUCAUUACCAAGGCUUUUJAGAAUGCAGUUUCUCAUUUGCUGUGGACAUGACCA<br>UAAAAAAAAUUUCCAGUAGGUUUUCUAUCUGCUACUUUGCUGCAAUCAGCUU<br>GGGGAACAGUU                            |
| ex3_51_71952_x7 | AJ6094_55.1/1-133        | 29 | ####<br>## | 58   | 7 | AGCCUUUGUGUUGCCCAUUCACUUUGGAAACUAGUGAAUGUGGUGUCAAAAAAGG<br>CGUAAUUAAACGCUUUGCAGCCUUUCCUGCCCUUAAAUUUGAUACCUUUGGUG<br>UAGGAGCUGCAUAAGUAACAGUU                |
| ex3_51_76572_x7 | AP001_458.6/7_2689-72837 | 26 | ####<br>## | 52   | 7 | CCUCCUUUUCUUGGCGGGGAUCGGGCUUGUGGUGCCGCUCCCCGUAUUGUACGG<br>AGGAAGAGGGAAAGGGCUCUGGCCCCUCGGCGUCAUGUCUUCGGUGCUGGCGG<br>CUUCCAUCCGCUGGUUCUAUCCUCAACGCCGGGACACCG |
| ex3_51_78677_x6 | ENST0_000038_4391.2      | 19 | 8E-06      | 38.2 | 6 | AAGAGTATAATTTTCAGGCATCAATTCTGTAGTTCCTTACTAGAGAAGTTTCTCTTAACA<br>T                                                                                          |
| ex3_51_79271_x6 | AJ6094_79.1/1-123        | 21 | ####<br>## | 42.1 | 6 | GAGCACUGUUCGUAACCCGUUAGCCUGGCUGUAGCUAAUGGGUUCCAUUCGGU<br>GCAAUAGCAUUCCAGCGACACAUGACUGACUGGUGGCUUUCAGUUUCAGG<br>UCUUGGAGACAAU                               |
| ex3_51_80801_x6 | ENST0_000038_4111.1      | 29 | 2E-11      | 58   | 6 | TGCAGCCGTGTCAAATTCAGTACCTGTCCTATGCATGGTAGGCACTGGCCCAGAAG<br>GCTG                                                                                           |
| ex3_51_82469_x6 | ENST0_000036_5633.1      | 27 | 2E-10      | 54   | 6 | TGGCGTCCATGATGTTCCGCAACTACCTACATTGTTTGATCCTCATGAAAGCAGCACT<br>GG                                                                                           |

|                        |                                                  |    |       |      |   |                                                                                                                                                                                   |
|------------------------|--------------------------------------------------|----|-------|------|---|-----------------------------------------------------------------------------------------------------------------------------------------------------------------------------------|
| ex3_51<br>83315_<br>x6 | ENST0<br>000038<br>3966.1                        | 31 | 1E-12 | 61.9 | 6 | CGGCAGACAGTTATCCCTTTCTAGTCTGGCTCGTGGGACTCTAGAGGGAGTCAGTCT<br>GCA                                                                                                                  |
| ex3_51<br>85475_<br>x6 | AC025<br>362.12/<br>104850<br>-<br>104982        | 23 | 4E-08 | 46.1 | 6 | GCGCUGUCUUUGAGCCCCGCCGAGCUUCCUCGUGGCGCCGGGGGUCAAUCUGC<br>AGCGCUAGAGCAUGUGCUUUGCAGUAACUGGGGCGCCUGGCCUCCCGCGGGCG<br>GCCUUUUUAACCGCGAGCGACAAGA                                       |
| ex3_51<br>85577_<br>x6 | ENST0<br>000038<br>4756.1                        | 31 | 1E-12 | 61.9 | 6 | TCCCAATGAAGAACTTTACATGTCTTACTCTCTGTCCTAGTCCCAGAGCCTGTAAA<br>GG                                                                                                                    |
| ex3_51<br>86741_<br>x6 | ENST0<br>000058<br>4302.1                        | 26 | 8E-10 | 52   | 6 | CTACCAAAAGTTAGCTTTTTGGGGGCAGGTTTTTAAGTAACCTTTGCCAACTTGGG<br>CTA                                                                                                                   |
| ex3_51<br>88805_<br>x6 | ENST0<br>000040<br>8139.1                        | 26 | 8E-10 | 52   | 6 | CAGCCTGAAATGATGACTCTTTAAAAAATTCATGTCTCTTCTCTGACATTTTTCTCTG<br>G                                                                                                                   |
| ex3_51<br>92177_<br>x6 | ENST0<br>000040<br>8684.1                        | 23 | 4E-08 | 46.1 | 6 | TACATTCCATGATGTCCAGCACTGGGCTCTGATCACTCCGGAGGACACAGTTTTCCC<br>CAA                                                                                                                  |
| ex3_51<br>92543_<br>x6 | ENST0<br>000039<br>1232.1                        | 32 | 3E-13 | 63.9 | 6 | TTCGTTGTTGTCAATGATGTATTCTTCTTGGAAGTGAATCTAAGTGATCTGACTCAATA<br>T                                                                                                                  |
| ex3_51<br>94211_<br>x6 | CM000<br>680.2/2<br>171211<br>9-<br>217119<br>50 | 19 | 1E-05 | 38.2 | 6 | AACTTCCTGTATAAGCACTGTGCTAAAATCGCAGAACTAGGACCATATCTTGGTTTT<br>TGTGATAATGCTAGCAGAGTACACAGAAGAATAAACGTAACAGCATTGGATTATAAAG<br>ACTAGGGTGAGGCCAGGCGCAGTGGCTCACACGTGTAATCCCAGCACTTTGGGA |

|                 |                                    |    |            |      |   |                                                                                                                                            |
|-----------------|------------------------------------|----|------------|------|---|--------------------------------------------------------------------------------------------------------------------------------------------|
| ex3_51_94445_x6 | AK092_096.1/8_24-956               | 37 | 4E-16      | 73.8 | 6 | UGGCCCUUAUCGAAGCUGCAGCUGCUUCCGCAUAGCUGCUGUGGUCAAAAAGGA<br>GCCAGAGUGACAGUUUUCUUGACGGUCGCCGUUCUGUUUGUUAACUGAUC<br>UGCAACAUUUUGGAAAAUACAGUU   |
| ex3_51_96629_x6 | AF266_720.1/1_61-233               | 26 | ####<br>## | 52   | 6 | GCUAUGAUGAAUUUGAUUGCAUUGAUCGUCUGACAUGAUAAUGUAUUUUUGUCCU<br>CUAAGAAGUUCUGAGCUU                                                              |
| ex3_51_97241_x6 | ENST0_000038_4281.1                | 22 | 1E-07      | 44.1 | 6 | GAGCACTGTTCGTAACCCGTTAGCCTGGCTGTAGCTAATGGTTCCATTCCGGTGCA<br>ATA                                                                            |
| ex3_51_98513_x6 | AL132_709.5/1_91680-191609         | 23 | 4E-08      | 46.1 | 6 | UAGACCAAUGAUGAGUAUUCUGGGGUGUCUGAAUCAUGAUUUUGAUUAAACCCU<br>GUAACUCUGAGGUCCAU                                                                |
| ex3_51_98753_x6 | CM000_666.2/1_595074_58-159507_372 | 21 | ####<br>## | 42.1 | 6 | AAGACTCTACTTTCAGGGATCACTTCTATAGTCCATCCCTAGAGAAGTTTCTCTGAAA<br>GTGTAGAGCAGCAGTCCCCAGTCCCTGGG                                                |
| ex3_51_99191_x6 | ENST0_000036_4259.1                | 27 | 2E-10      | 54   | 6 | GGGCATACCCGTAGACCTTGTCTGACTGTGCTCATGGCCAGGCAGGGGGGACAGTG<br>TATG                                                                           |
| ex3_51_99947_x6 | AJ6094_51.1/1-130                  | 25 | 3E-09      | 50.1 | 6 | AUCCUCCUGAUCCCUUCCCAUCGGAUCUGAACACUGGUCUUGGUGGUCGUAAAA<br>GGAGGAAAAGUAAUAGUGAAGCUGGCCUAAAUGUUGUAAUCUGGUUAUAUGGCAUG<br>UGGGCUAGUUUCAGACAGGU |

|                        |                                                    |    |            |      |   |                                                                                                                                                   |
|------------------------|----------------------------------------------------|----|------------|------|---|---------------------------------------------------------------------------------------------------------------------------------------------------|
| ex3_52<br>00295_<br>x6 | AC064<br>836.7/1<br>6842-<br>16926                 | 25 | 3E-09      | 50.1 | 6 | UUCAAUGUUGUCAAUUGAUGCAUUCUUAUUGGAACUGAAUUUAAGUGAUCUGACUC<br>AUUCGUCACUACCACUGAGACAACAUUGAG                                                        |
| ex3_52<br>00877_<br>x6 | ENST0<br>000038<br>4390.1                          | 20 | ####<br>## | 40.1 | 6 | TCGCTATGATGATGGATTCCAAAACCATTCGTAGTTTCCACCAGAAAGTCTTATGTTG<br>GC                                                                                  |
| ex3_52<br>02953_<br>x6 | ENST0<br>000045<br>9386.1                          | 28 | 3E-08      | 48.1 | 6 | GTCCAGAAAACAATGATGTGGTAATTTCCAAGCACATATCTGATGATTCCATGTGGAA<br>TT                                                                                  |
| ex3_52<br>03067_<br>x6 | CM000<br>664.2/2<br>314559<br>36-<br>231455<br>800 | 26 | 8E-10      | 52   | 6 | GTCTTCTCATTGAGCTCCTTTCTGTCTATCAGTGGCAGTTTATGGATTTCGCACGAGAA<br>GAAGAGAGAATTACAGAACTAGCATTATTTTACCTTCTGTCTTTACAGAGGTATATTT<br>AGCTGTATTGTGAGACATTC |
| ex3_52<br>03583_<br>x6 | AY077<br>742.1/1<br>-131                           | 25 | 3E-09      | 50.1 | 6 | UGGGAGGCUGAUACACAAAUUGGGCUGAAAUACUGCUCUACUUGUCACCAUGCCU<br>CCCUAGAAUAAACUGCCUUUUGAUGACCGGGACGAAUUGAGUGAAUUCGUAACGG<br>ACAGAUACGGGGCAGACAGAU       |
| ex3_52<br>06991_<br>x6 | ENST0<br>000038<br>4675.1                          | 26 | 8E-10      | 52   | 6 | TTCCACAGCTACTGGTCTGCAGCTGTTCTTATGGTAGCAGTTGTGGCATTCTCTGT<br>GGG                                                                                   |
| ex3_52<br>07033_<br>x6 | AJ0030<br>41.1/11<br>9-186                         | 25 | ####<br>## | 50.1 | 6 | UUGCCAAUGAUGGUUAAGAAUUUCUUCACCUGAAUAAACCAUGUGGUCAGCAUUG<br>CAUCUGAGGCAAA                                                                          |
| ex3_52<br>14581_<br>x6 | ENST0<br>000036<br>4043.1                          | 28 | 6E-11      | 56   | 6 | AAGTAGGGTGATGAAAAGAATCCTTAGGCGTGGTTGTGGCCGTCTTGGTCACCTGT<br>GTG                                                                                   |

|                        |                                                  |    |            |      |   |                                                                                                                                                                                                  |
|------------------------|--------------------------------------------------|----|------------|------|---|--------------------------------------------------------------------------------------------------------------------------------------------------------------------------------------------------|
| ex3_52<br>18406_<br>x5 | CM000<br>663.2/9<br>284071<br>9-<br>928408<br>51 | 25 | 3E-09      | 50.1 | 5 | GTGCAAACCTCGATCACTAGCTCTGCGTGATGTGGCAGAAGCGAAGGGAACCAGGTT<br>TGCAAAAAGTAACTGTGGTGATGGAAATGTGTTAGCCTCAGACACTACTGAGGTGGTT<br>CTTTCTATCCTAGTACAGTC                                                  |
| ex3_52<br>19041_<br>x5 | AJ6094<br>31.1/1-<br>133                         | 41 | 2E-18      | 81.8 | 5 | UAGCAAGCCUCCAGCGUGCUUUGGGUCUGCGGUGACCCUAUGCAUUCUUCAGUG<br>CUUGCUAGAACAGUUUUGAAACGGUUUGAGGCCUUGCCUGCUCCAUCCAGAGCA<br>AGGUUAUAGAAAUUUCAGACAAUG                                                     |
| ex3_52<br>23066_<br>x5 | AL132<br>709.5/1<br>78148-<br>178075             | 27 | 2E-10      | 54   | 5 | UGGACCAAUGAUGAGAUUGGAGGGUGUCUGAAUCAAAAAUUUUGAUUAAAGCCAU<br>CUGUAACUCUGAGGUCCA                                                                                                                    |
| ex3_52<br>23341_<br>x5 | ENST0<br>000036<br>5659.1                        | 27 | 2E-10      | 54   | 5 | TCAAAATGATGAGATTCCACTTAATTGGTCCGTGTTTCTGAAACACATGATATTTGTG<br>GA                                                                                                                                 |
| ex3_52<br>23676_<br>x5 | AC132<br>192.3/7<br>1954-<br>71776               | 21 | ####<br>## | 42.1 | 5 | GUAAUGUGUGCAUAGGUUUCAUCUGUGUCUGGUAGCAGUGUCUGUCUGUGUUUU<br>UCAUUCAGAUUCUUGCUAUCCACACAAACAUCAUGCGGCCAAAGAGUAACUUGGGA<br>UCAUAGUACUGGUCUAGUGUUUGUCUCUGGACACAUCUACCACUGGCCAGCCUCCA<br>AAUUCCACACACAG |
| ex3_52<br>24631_<br>x5 | AC068<br>213.7/1<br>0987-<br>11117               | 25 | 3E-09      | 50.1 | 5 | CUCCAUGUAUCUUUGGGACCUGUCAAGUGUGGCAGUCUCCCUUCCUUGCCAUGG<br>AAGAGCAUAUUCUUGUUUACCAGCAAAGCUGUCACCAUUUAAUUGGUAUCAGAUU<br>CUGACUUGCACAAGUAACAUC                                                       |

|                        |                                                    |    |            |      |   |                                                                                                |
|------------------------|----------------------------------------------------|----|------------|------|---|------------------------------------------------------------------------------------------------|
| ex3_52<br>27311_<br>x5 | AC090<br>227.10/<br>15359-<br>15277                | 20 | 2E-06      | 40.1 | 5 | UGGCCGAUGAUGACGAGACCACUGCGCAAUCUGAGUUCUGGGAACCAGGUGAUG<br>GAGUAUGUUCUGAGAACAGACUGAGGCCG        |
| ex3_52<br>29301_<br>x5 | ENST0<br>000057<br>7887.1                          | 44 | ####<br>## | 71.9 | 5 | TTGCTGTGATGACTATCATTGGGTTTCGCATGTTGCTGAGTTCAGTGATGCCTCTTT<br>TC                                |
| ex3_52<br>30256_<br>x5 | ENST0<br>000038<br>6967.1                          | 22 | 1E-07      | 44.1 | 5 | TGGGAAGTGATGACACCTGTGACTGTTGATGTGGAAGTATTTATCGCGTATTCGTA<br>CTG                                |
| ex3_52<br>30481_<br>x5 | CM000<br>684.2/3<br>931911<br>3-<br>393190<br>50   | 30 | 4E-12      | 60   | 5 | CACAGATGATGAACTTATTGACGGCGGACAGAACTGTGTGCTGATTGTCACGTTC<br>TGATTTG                             |
| ex3_52<br>30556_<br>x5 | ENST0<br>000045<br>9187.1                          | 22 | ####<br>## | 44.1 | 5 | TTGCCCGATGATTATAAAAAGACGCGTTATTAAGAGGACTTTATGCTGGAGTTCTTGA<br>CG                               |
| ex3_52<br>30646_<br>x5 | ENST0<br>000051<br>6165.1                          | 24 | 0.000<br>6 | 32.2 | 5 | CTGGTCAACAGAGAGAGACTCTGTCTCAAAAAAAGAAAGAAAAGATTTCTGATGTG<br>CTA                                |
| ex3_52<br>34636_<br>x5 | ENST0<br>000036<br>4993.1                          | 21 | ####<br>## | 42.1 | 5 | AGCCACCGCACCCGCGGGCTGTATTCTTACACTGACTGTATAGAAAGAGGAGAT<br>AGAG                                 |
| ex3_52<br>39511_<br>x5 | ENST0<br>000038<br>5573.1                          | 24 | 1E-08      | 48.1 | 5 | TGCACTTATGTATGTTTTTGTAACTTGTGGACAAAGACTTATGGATAGGTGCAAAA<br>AA                                 |
| ex3_52<br>40186_<br>x5 | CM000<br>673.2/1<br>020569<br>27-<br>102057<br>017 | 15 | 0.005      | 30.2 | 5 | ATTTTTATTTTTATATGCCTATTTTTATCCTTTGCTGACATGTGCCACCCTCAAACCTT<br>GTGATGATGTCAGCACATTACCCTTCTGACA |

|                        |                                                    |    |            |      |   |                                                                                                                                                                                                                   |
|------------------------|----------------------------------------------------|----|------------|------|---|-------------------------------------------------------------------------------------------------------------------------------------------------------------------------------------------------------------------|
| ex3_52<br>40196_<br>x5 | CM000<br>667.2/1<br>722524<br>78-<br>172252<br>334 | 17 | 0.000<br>1 | 34.2 | 5 | CCTCGCTTTCTTTGCAGGGAGCAGGTATGTATGTTCCCTATTATGTCTGGAGGCAGA<br>GGGAAAAGGCTTCAGTCCCCTGGGCATCATGTCTTTGGTGCCGCTGGCTTCCTGTCT<br>GCCAATTCTATCCTCAAGCACTGGGACACAG                                                         |
| ex3_52<br>42786_<br>x5 | ENST0<br>000060<br>9620.2                          | 33 | 8E-14      | 65.9 | 5 | TAGAGAAGTCAATGATGGTTTTATTTCATATCGTCTGAACCTGTCTGAAGCATCTCAGT<br>GA                                                                                                                                                 |
| ex3_52<br>42861_<br>x5 | ENST0<br>000051<br>7258.1                          | 15 | 0.003      | 30.2 | 5 | GACTAGTACCACCTCACACCCGCAGAGCACTGGGCCCTGCCTGGGGTGAAATGCCA<br>GTTG                                                                                                                                                  |
| ex3_52<br>43126_<br>x5 | AC079<br>951.35/<br>115286<br>-<br>115150          | 20 | 2E-06      | 40.1 | 5 | GUGGCCCUAGACUGAAGACCAGCAGUUGUACUGUGGCUGUUGGUUUCAGCAGAG<br>GCCUAAAGGACUGUCUUCUGUGGUCUGUUGGCUGUUCUGGGACCUCAGUAGGG<br>AAUGGCUAUUUCAUUUGGAAGAAACAACC                                                                  |
| ex3_52<br>43146_<br>x5 | BC042<br>667.1/5<br>32-663                         | 35 | 5E-15      | 69.9 | 5 | ACUGCCCCUAGAGGCGUUGCAGCUGUGGCUGCCGUGUCACAUCUGUGUCAUUAA<br>GUGGCAGAGAUUAGAGAGGCCU AUGUCUACGCUCAGCGUUCUGCCCCGUGAACGU<br>UUGAAUGUUUGAUAGUCUCACACU                                                                    |
| ex3_52<br>44461_<br>x5 | AC007<br>318.4/8<br>0306-<br>80504                 | 14 | 0.008      | 28.2 | 5 | UCCAGCAGUCGUUAGCUCUCCUGGCUAGUGUGAUGCCUGUGAUGGUGUUUCACU<br>GUUGGAACAGCAAGCACUGUCUAAUUGAGGCUUGGCUCGGGUGCUGUUUUGG<br>UGUGGGGCCAAGUAUACCUUUGGGCAGUGUUUUGCACUUCUGAGAGUGAAAUGA<br>CUCCUGUGGAGUCGGUCCUAAUCUGAGUGCAAACAAU |

|                 |                                |    |            |      |   |                                                                                                                                                                                                              |
|-----------------|--------------------------------|----|------------|------|---|--------------------------------------------------------------------------------------------------------------------------------------------------------------------------------------------------------------|
| ex3_52_44511_x5 | ENST0000516733.1               | 28 | 6E-11      | 56   | 5 | TGCCAATGATGGTTAAGAATTTCTTCACCTGAATAAACCATGTGGTCAGCATTGCATCTG                                                                                                                                                 |
| ex3_52_45331_x5 | KN196479.1/176189-176262       | 21 | ####<br>## | 42.1 | 5 | TTGCAGTGATGTAAAATTTCTTGGCCTGAAATTACTGTGAAGAGTAAAACCGAGCTTTTAAACACTGAGTCAGC                                                                                                                                   |
| ex3_52_45366_x5 | CM000672.2/100237302-100237156 | 20 | 2E-06      | 40.1 | 5 | AGTTGTGGTGGTTTTCTTTTTGGCACATTTGTAAAGTTTTCAAATGGGCCTAACTCTGCCACATATATAATATCGGAGATGGCAAAGCCTTGTGACGGAGATATCTCTCTTAAGCCTTTCCTGCATCAGAGAATGGCTCCCACATGT                                                          |
| ex3_52_47701_x5 | CM000663.2/75789548            | 20 | ####<br>## | 40.1 | 5 | GGTCAATGATGTAATGGCATGTATTAGCTGAATCTAAAGTTGATGTGAGTTCTAAAAT TAACTGAGACCTT                                                                                                                                     |
| ex3_52_47706_x5 | D00591.1/3109-3311             | 31 | 1E-12      | 61.9 | 5 | CCAACGUGGAUACCCUGGGAGGUCACUCUCCCCAGGCUCUGUCCAAGUGGCAUA GGGGAGCUUAGGGCUCUGCCCAUGAUGUACAGUCCCUUCCACAACGUUGAAGA UGAAGCUGGGCCUCGUGUCUGCGCCUGCAUAUCCUACAGCUUCCCAGAGUCCU GUGGAUAAUGAUAGGGGAGACAAACCAUGCAGGAAACAUAU |
| ex3_52_48221_x5 | ENST0000458862.1               | 22 | 2E-07      | 44.1 | 5 | TGGAGGACTGAGAAGGTGAGGCAGTTTTGCCCGTGCTGCCTTCCACCGGTTAAGACCTC                                                                                                                                                  |
| ex3_52_51961_x5 | CM000666.2/151103827-          | 25 | 3E-09      | 50.1 | 5 | AATAAGTGATGAAAAAAGTTTTCGGTCCCAGATGATGGCCAGTGATAACAACATTTTTCTGATGTT                                                                                                                                           |

151103  
891

|                        |                                                  |    |            |      |   |                                                                                                                                                 |
|------------------------|--------------------------------------------------|----|------------|------|---|-------------------------------------------------------------------------------------------------------------------------------------------------|
| ex3_52<br>52761_<br>x5 | AL132<br>709.5/1<br>34553-<br>134482             | 24 | 1E-08      | 48.1 | 5 | UGGAUCGAUGAUGAGCACUGGUGGAGUAUGAGUCACAUACGAUGAAUACGUGUCU<br>GGAACUCUGAGGUCCAU                                                                    |
| ex3_52<br>53771_<br>x5 | AJ6094<br>68.1/1-<br>136                         | 38 | 1E-16      | 75.8 | 5 | AAGCACUGCCUUUGAACCGAUGUGUCUUGUUUGUAGCUUCACGGGCCAAGCAAC<br>AGUGCUAGAGCAUAACGACUUGUUUAUACUGGGGCUCUUCAGCUCUCAACUGAAC<br>UGCUCUUUUAAAAACAAGGUACAUUU |
| ex3_52<br>54701_<br>x5 | ENST0<br>000038<br>4289.1                        | 22 | 1E-07      | 44.1 | 5 | TTCCAAAGTGTTGAGTTCAGTCCAGGGCAGCTTCCCTGTTCTGTTAATTAACCTTTGG<br>GA                                                                                |
| ex3_52<br>55096_<br>x5 | ENST0<br>000039<br>0981.1                        | 28 | 6E-11      | 56   | 5 | ACTGAGGAATGATGACAAGAAAAGGCCGAATTGCAGTGTCTCCATCAGCAGTTTGCT<br>CTC                                                                                |
| ex3_52<br>56806_<br>x5 | AC010<br>325.7/1<br>35083-<br>134993             | 31 | 1E-12      | 61.9 | 5 | GGGCUCCCAUGAUGUCCAGCACUGGGCUCUGAUCACCCCUGAGGACACAGUGCA<br>CCCCAGGACCUUUGACACCUUGGGGGUCUGAGGGGCC                                                 |
| ex3_52<br>57086_<br>x5 | AL121<br>809.6/1<br>49441-<br>149356             | 26 | ####<br>## | 52   | 5 | UGGCAACUGUGAUGAAAGAUUUGGUCUGUAUGUAAUAGAUUUUUAUUACUAAAUGA<br>GGACAACAGUCCCUCUAAACUGAUGUUGCCA                                                     |
| ex3_52<br>57201_<br>x5 | CM000<br>673.2/6<br>285303<br>5-<br>628529<br>10 | 21 | 5E-07      | 42.1 | 5 | TCCAATGAAGAACTTTTACATGTCTTACTCTCTGTCCTAGTCCCAGAGCCTGTAAA<br>GGTGAACCCACTGGGACTGGCTGGGGGAGAAGAGGAAGATTTGTTCCAGAAGGAAC<br>TGTCTGAGGGAT            |

|                        |                                                    |    |            |      |   |                                                                                                                                                    |
|------------------------|----------------------------------------------------|----|------------|------|---|----------------------------------------------------------------------------------------------------------------------------------------------------|
| ex3_52<br>57521_<br>x5 | AK123<br>993.1/1<br>023-<br>1100                   | 29 | 2E-11      | 58   | 5 | CUGAGCUGAGGAUGAUUUAAAGUUAUCCUGUCUGAAAUGGUAUCUUUUGUGAGG<br>AGGUCUGACUUGCUGAGGCUCAG                                                                  |
| ex3_52<br>57686_<br>x5 | ENST0<br>000062<br>8922.1                          | 22 | 2E-07      | 44.1 | 5 | AAGACTATACTTTGAGGGATCATTTCTATAGTTTGTTACTGGAGAAGTTTCTCTGAATA<br>T                                                                                   |
| ex3_52<br>59561_<br>x5 | CM000<br>668.2/6<br>721048<br>0-<br>672104<br>08   | 18 | 0.008      | 28.2 | 5 | AAACGATGAACTCACCTAAAATAGCTGTAATAACCAGCAGATTATGTAATGGCAAACC<br>TACAGTTTTCTGAAT                                                                      |
| ex3_52<br>63951_<br>x4 | ENST0<br>000051<br>7061.1                          | 19 | 0.005      | 30.2 | 4 | GCTTAGGGAGGGTGCTCTGCCAGGTTCCAATCCTGGTTCCACTGCATATGAGCCTT<br>GTA                                                                                    |
| ex3_52<br>64267_<br>x4 | AC087<br>863.10/<br>61455-<br>61585                | 23 | 4E-08      | 46.1 | 4 | CCCUCCUACAAAGGCAUGUCUAUAAUCCUUGUCUUUGGACAUGUAAGAAUUGGA<br>GGGACAGAAAUGUGGACUUGGAGAAAUCUGGGGCCAGCUUUCUCAUCACAGGCU<br>CAACAUCAACCAUGCCACAUAG         |
| ex3_52<br>64283_<br>x4 | CM000<br>665.2/1<br>540075<br>02-<br>154007<br>367 | 22 | ####<br>## | 44.1 | 4 | TCGTCAGGTGGGAGAATTCTTACATGTTCCCTCCTTTTGCAAGGCAGATTAGAACATGA<br>TGATTGGGGTTTCGCATAATATGTGATTAACGTTTCTGTGTAATCAGGACTTGCAACAT<br>CCCGAATGCCCTTACCTGAC |
| ex3_52<br>64291_<br>x4 | ENST0<br>000063<br>0737.1                          | 23 | 4E-08      | 46.1 | 4 | GAGCACTGCTTTAGAGCCTCTGCGTGTCTGGCTGTGGCCTCAGGGGTCTAGCAGCA<br>GTGC                                                                                   |

|                        |                                                    |    |       |      |   |                                                                                                                                          |
|------------------------|----------------------------------------------------|----|-------|------|---|------------------------------------------------------------------------------------------------------------------------------------------|
| ex3_52<br>64611_<br>x4 | AC079<br>802.6/8<br>0721-<br>80594                 | 23 | 4E-08 | 46.1 | 4 | UAGACUUGUGCAUGUUUUUGCUUAACUUGUGGAUAAAGUCUUACAGACAGGUGCA<br>AAAAUAAAUCCUCUUUUUGCAACCCAGAACUCAUUGUUCAGUAUGAGUUUUGAUAC<br>AUUAUAGAAAGGACAUU |
| ex3_52<br>65395_<br>x4 | ENST0<br>000036<br>4133.1                          | 22 | 1E-07 | 44.1 | 4 | GGGCATACCCGTAGACCTTGCCTGACTGTGCTCATGTCCAGGCAGGGGGGACATTG<br>TATT                                                                         |
| ex3_52<br>65523_<br>x4 | CM000<br>671.2/1<br>333504<br>56-<br>133350<br>528 | 20 | 2E-06 | 40.1 | 4 | TTGCAATGATGTGAATCTCTCACTGAATTCAACCTTGAAGTGCGAATCCATGAGCTTT<br>TTAACCTGAGCAAT                                                             |
| ex3_52<br>67183_<br>x4 | ENST0<br>000036<br>4533.1                          | 30 | 4E-12 | 60   | 4 | TCACTGTGATGATGGTTTTCCAACATTCGCAGTTTTCCACCAGAAAGGTTTTCTTAGT<br>GT                                                                         |
| ex3_52<br>67459_<br>x4 | AL138<br>976.5/1<br>50375-<br>150500               | 39 | 3E-17 | 77.8 | 4 | AAGCAACACUCUGUGGCAGAUGAUCAAACUGUCUGACACAAUUUGAGCUUGCUA<br>UAGCAAGAAAGUCUAACCUAUUCCGGUGUUCUCUCUCCAUGAGACAAGCCGUUA<br>UAUAGACUAAAACAGU     |
| ex3_52<br>67487_<br>x4 | AC114<br>402.2/3<br>8652-<br>38776                 | 23 | 4E-08 | 46.1 | 4 | GCAGACUCACUAUGCACCUGACUGUACUUCAGGCAGGUGCUUUUUCUGUCUGC<br>CAGAGAAACAUUCCAGGGUGCUGUGGCUGCCUCACCUAUCCAGGGCGAUGCAGC<br>UCCCUGGGGACACAGGU     |
| ex3_52<br>67839_<br>x4 | ENST0<br>000060<br>6420.1                          | 29 | 2E-11 | 58   | 4 | GGCCTCCTGGTGCTTACCACAGGCTGTGTTCTTACACTGACTGTATAGAAAGAGGAG<br>GTA                                                                         |

|                        |                                                    |    |       |      |   |                                                                                                                                                |
|------------------------|----------------------------------------------------|----|-------|------|---|------------------------------------------------------------------------------------------------------------------------------------------------|
| ex3_52<br>67995_<br>x4 | ENST0<br>000038<br>3895.1                          | 20 | 2E-06 | 40.1 | 4 | AAAGCAGGTTGCAATTACAGTGCTTCATTTTGTGGAAGTACTGCCATTATCCTGCTGAA                                                                                    |
| ex3_52<br>69203_<br>x4 | ENST0<br>000063<br>0429.1                          | 29 | 2E-11 | 58   | 4 | ACTGCCCCTAGAGGCGTTGCAGCTGTGGCTGCCGTGTCACATCTGTGTCATTAGGT<br>GGCA                                                                               |
| ex3_52<br>69699_<br>x4 | CM000<br>684.2/3<br>778552<br>6-<br>377856<br>33   | 15 | 0.002 | 30.2 | 4 | ATCCTTTTGTCTTCATAAGCATGACGATTGGGCTTTCATGCTCATGCATGAGATGGG<br>CCTCCCTTCAGTCTTGTTACAGGCCGGCTCTGTGGCTCATGCCTGTAATC                                |
| ex3_52<br>70331_<br>x4 | AJ2431<br>99.1/1-<br>78                            | 21 | 6E-07 | 42.1 | 4 | GCCAUUAUGAUGUUUUCUUUUCGAAAGGUGAGCGCUUUGCGCAGUGAUGACCCUC<br>AUCUAUCACCCUUGACUGAUGGCU                                                            |
| ex3_52<br>70931_<br>x4 | AC016<br>876.10/<br>19660-<br>19526                | 20 | 2E-06 | 40.1 | 4 | UGUCCCUGACCUGGGUAGAGUGGCAUCUGGUUGGUGAUGCCCAUCUCAUAUCAG<br>CCAGGGACAAAGCAACUCCUUGUUCAUCCCAGCUUGGCUUUUGAUCGUGCCCAU<br>GCCUGGUUCAUGCCUUGGACACAUAG |
| ex3_52<br>71447_<br>x4 | ENST0<br>000036<br>3593.1                          | 30 | 4E-12 | 60   | 4 | TCGTCAGGTGGGATAATCCTTACCTGTTCCCTCCCGGAGGGCAGATTAGAACATGA<br>TGA                                                                                |
| ex3_52<br>75599_<br>x4 | ENST0<br>000045<br>8893.1                          | 32 | 3E-13 | 63.9 | 4 | GTGCATATGATGGAAAAGTTTTAATCTCCTGACACTTGTGATGTCTTCAAAGGAACCA<br>CT                                                                               |
| ex3_52<br>76495_<br>x4 | CM000<br>663.2/1<br>738677<br>50-<br>173867<br>671 | 39 | 3E-17 | 77.8 | 4 | GTGCCCTGCCTCTGATGAAGCCTGTGTTGGTAGGGACATCTGAGAGTAATGATGAAT<br>GCCAACCGCTCTGATGGTGGCAC                                                           |

|                 |                                                  |    |            |      |   |                                                                                                                                                |
|-----------------|--------------------------------------------------|----|------------|------|---|------------------------------------------------------------------------------------------------------------------------------------------------|
| ex3_52_79935_x4 | CM000<br>682.2/3<br>842744<br>2-<br>384273<br>09 | 34 | ####<br>## | 67.9 | 4 | TCCTGCATCCGAAAGTGATCATAGGCTGCCTGTGCCTAGGTCATTGATAGTGCAGGG<br>AGAGGAACGCTGAAAGAGGTTGTCCCCGTGTTTGGAGGGTCCACCCTATCCCATCC<br>GAACCCTGAAGCTTTCACACA |
| ex3_52_82363_x4 | CM000<br>667.2/6<br>887395<br>4-<br>688740<br>87 | 22 | ####<br>## | 44.1 | 4 | CCCAAAGTGCTGGGATAACCCTTACCTGTTTCTCCTTTGCAGGGCAGATAGAACATG<br>ATAATTGGAGATGCATGAAACGTGATTAATCTCTCTGTATAATCAGGACTTGCAACAC<br>ACTTAATTTTTTTTTTAAT |
| ex3_52_83215_x4 | ENST0<br>000062<br>8177.1                        | 30 | 4E-12      | 60   | 4 | GTCTGTGATGAATTGCTTTGACTTCTGACACCTCGTATGAAAACCTGCACGTGCAGTCT<br>GA                                                                              |
| ex3_52_84063_x4 | ENST0<br>000038<br>6157.1                        | 22 | ####<br>## | 44.1 | 4 | CTTCCTCAGCCTTACTCCAGGGACTTTTTGTTGCCTGTAAAGTGCTCTGGCATTGCCT<br>GA                                                                               |
| ex3_52_85083_x4 | ENST0<br>000036<br>2704.1                        | 22 | 1E-07      | 44.1 | 4 | TTGTTATGATGAGATTCCACTTAAGGTCCGTGTTTCTGAAACAAATGATTTTGTGGAA<br>GT                                                                               |
| ex3_52_85271_x4 | BK005<br>567.1/2<br>84-353                       | 23 | 4E-08      | 46.1 | 4 | GGGCAAUGAUGAAAAGGUUUUACUACUGAUCUUUGUAACUAUGAUGGUUUUCUACA<br>CUUGACCUGAGCUCA                                                                    |
| ex3_52_92499_x4 | AJ6094<br>61.1/1-<br>133                         | 32 | 3E-13      | 63.9 | 4 | GGGUCAUUUCAAGAGGGCUUAUGAGGCUGUGAAACCCAGAGCUCUUAACGCUGU<br>GACCAAAGAUGGAAGUUCUCUAUAGGAAGCCAUAGCACUCCUAAUGUUUGGUGCU<br>AUGUUUCCUGAGGAGAUUAAA     |

|                 |                                                  |    |            |      |   |                                                                                                                                              |
|-----------------|--------------------------------------------------|----|------------|------|---|----------------------------------------------------------------------------------------------------------------------------------------------|
| ex3_52_92571_x4 | CM000<br>663.2/4<br>477839<br>0-<br>447784<br>58 | 21 | ####<br>## | 42.1 | 4 | TCTCAGTGATGAAAACCTTTGTCCAGTTCTGCTACTGACAGTAAGTGAAGATAAAGTGT<br>GTCTGAGGAGA                                                                   |
| ex3_52_93663_x4 | AJ2240<br>25.1/2-<br>73                          | 21 | 5E-07      | 42.1 | 4 | GGUGCAAUUGAUGCAUAUGUUAGCGACCAAAGCCUGAUCUUUGCUGAUUAGUCAU<br>AAUUAACUGACUGCACC                                                                 |
| ex3_52_94595_x4 | AK027<br>016.1/1<br>395-<br>1517                 | 26 | ####<br>## | 52   | 4 | UGGUCAUUACCAAGGCUUUUJAGAAUGCAGUUUCUCAUUUGCUGUGGACAUGACCA<br>UAAAAAAAAAUUCCAGUAGGUUUUCUAUCUGCUACGUUGCUGCAAUCAGCUU<br>AUUGGGAACAGUU            |
| ex3_52_95627_x4 | ENST0<br>000051<br>7238.1                        | 20 | 0.000<br>6 | 32.2 | 4 | CAAAGTTCTGGAATTACAGGTGTGAGCCACCGTGCCAGCATTAAAATTTAATATG<br>TA                                                                                |
| ex3_52_95671_x4 | ENST0<br>000040<br>8789.1                        | 25 | 3E-09      | 50.1 | 4 | GGGGTGTGCTCAGAGCAGGGGGCCCAAAGAATGGCTCCTCTGTTTACAACACACCC<br>AACA                                                                             |
| ex3_52_97311_x4 | CM000<br>682.2/3<br>842980<br>3-<br>384296<br>70 | 27 | 2E-10      | 54   | 4 | CCCTGCATTGAAAGTGATCATGAGCTGCCCGTGCCCTGGTCATTGGTAGTGCAGG<br>GAGAGGAACTGCCGAGAGCACTTCCCCGTGTTTGGAGGGTCCACTCCTGTCTCTTC<br>CAAACCCTGGAGCTTTCCACA |
| ex3_52_97547_x4 | ENST0<br>000036<br>2915.1                        | 25 | 3E-09      | 50.1 | 4 | TGGTCCATCCTAATCCCTGCCGGTCCATCTGTGGCCTGCCAGGTTTCGCTTGTGGAC<br>CAG                                                                             |

|                        |                                                  |    |       |      |   |                                                                                                                                                                                                                                                                                              |
|------------------------|--------------------------------------------------|----|-------|------|---|----------------------------------------------------------------------------------------------------------------------------------------------------------------------------------------------------------------------------------------------------------------------------------------------|
| ex3_52<br>98439_<br>x4 | CM000<br>674.2/6<br>967606<br>-<br>696733<br>7   | 24 | 1E-08 | 48.1 | 4 | CAGGCTGATGAGACTAAGGCGAATGCGACTCCGTGCTCTCTGGCCCTTGGCTCCTT<br>GTTGGGGGTGGGGACTACAGATGAGATCTGAAATCTTAGTGGTAGTACCTGAGCCAT<br>GACTCCCCACTGTAAGGCCAGATCAATAGCATTGGTGGCCTTGCCTTCATTTCTGGT<br>GCTGCCCTAGTTCCTGGCAGCAGCCTGCAGGGAGGCCACAGGTGGGGTCCACG<br>GTAGGGCTGGGCACAAGCCACCTGAGCGCAACCTTGGATCTGACA |
| ex3_53<br>03639_<br>x4 | AL132<br>709.5/1<br>46793-<br>146719             | 30 | 4E-12 | 60   | 4 | UGGACCAAUGAUGACAAAUGGUGGCAUUGGAGUUAUGGACGAUGAAUGAUUAUGUG<br>UCUGAAACUCUGAGGUCCAA                                                                                                                                                                                                             |
| ex3_53<br>04043_<br>x4 | ENST0<br>000036<br>4902.1                        | 28 | 6E-11 | 56   | 4 | TGCAGTCAAGTCAAATTCAGTGCCCGTTTCTGTCATAGCGGGGGCTGGCCCAGATG<br>GCTG                                                                                                                                                                                                                             |
| ex3_53<br>04423_<br>x4 | CM000<br>670.2/1<br>897961<br>9-<br>189797<br>72 | 14 | 0.009 | 28.2 | 4 | TATTCTTCTTGTTAGAGCTCGGAGTTGAGGCCAGTGACTGGCCAATGAACTCACAAG<br>TGTAGACAGGGTGTTACGCAAGGGACAAGTTTTTCACTAACACCACAAGAGTCTCTG<br>GCCCAATGAGAGGAGTTTAATAGAAATTCTTGCTACAAC                                                                                                                            |
| ex3_53<br>05127_<br>x4 | ENST0<br>000045<br>8790.1                        | 23 | 4E-08 | 46.1 | 4 | AGCCTTTGTGTTGCCCATTCACCTTTGGAAACTAGTGAATGTGGTGTCAAAAAGGCG<br>TAA                                                                                                                                                                                                                             |
| ex3_53<br>05883_<br>x4 | ENST0<br>000038<br>4365.1                        | 22 | 1E-07 | 44.1 | 4 | GGATCGATGATGAGTCCTCCAAAAAACATTCTTGGAAAAGCTGAACAAAATGAGT<br>GAG                                                                                                                                                                                                                               |

|                        |                                                    |    |       |      |   |                                                                                                                                               |
|------------------------|----------------------------------------------------|----|-------|------|---|-----------------------------------------------------------------------------------------------------------------------------------------------|
| ex3_53<br>06631_<br>x4 | ENST0<br>000060<br>7547.2                          | 14 | 0.009 | 28.2 | 4 | AAGACTATACTTTTCAGGGATCATTCTCTAGTTCAATACTACAGAAGTTTCTCTGAAG<br>GT                                                                              |
| ex3_53<br>09115_<br>x4 | ENST0<br>000039<br>1007.1                          | 52 | 2E-15 | 71.9 | 4 | TTCAATGTTGTCAATGATGCATTCTTATTGGAAGTGAATTTAAGTGATCTGACTCATTC<br>G                                                                              |
| ex3_53<br>09771_<br>x4 | AC010<br>553.6/7<br>12-633                         | 20 | 2E-06 | 40.1 | 4 | CAGCCUGAAGUGAUGAUUCACAUUCAUGUCUCUUCUCUGAUAAAUUCUUGAAGAA<br>AAUUUUUGUGUGUCUGAUCAGGCCU                                                          |
| ex3_53<br>10635_<br>x4 | ENST0<br>000038<br>4706.1                          | 19 | 0.008 | 30.2 | 4 | GTCAGATGATTTGAATTGATAAGCTGATGTTCTGTGAGGTACAAAAGTTAATAGCATG<br>TT                                                                              |
| ex3_53<br>11903_<br>x4 | AC115<br>088.6/1<br>23021-<br>122911               | 21 | 5E-07 | 42.1 | 4 | UGUGAGAGUGAUGAGUUGCACACUGGUGGAGCCAUGGUAUCAGGUGAUACAGGC<br>ACCACUCAGUAUCACCCUGGUGACAAAUAAGUGCACAGGGGCCAUCUGACUCA<br>CA                         |
| ex3_53<br>12379_<br>x4 | ENST0<br>000038<br>4452.1                          | 24 | 1E-08 | 48.1 | 4 | CTGCATTCTTAAACCCTCTTGGTAGCTTCGTTCTAAGTGCTTCCAAGATATGAGTGAA<br>TG                                                                              |
| ex3_53<br>13667_<br>x4 | CM000<br>685.2/1<br>547685<br>28-<br>154768<br>659 | 28 | 6E-11 | 56   | 4 | TTCCAAAGTGTTGAGTTCAGTCCAGGGCAGCTTCCCTGTTCTGTTAATTAACCTTTGG<br>GACATTAATAATGGGCTAAGGGAGATGATTGGGTAGAAAGTATTATTCTATTCATTTGC<br>CTCCCAGCCTACAAAA |
| ex3_53<br>14835_<br>x4 | ENST0<br>000051<br>6890.1                          | 31 | 1E-12 | 61.9 | 4 | CCTCTTCTCAGAACACTTCTGGGTCTGATTGGTGGCCCAGGGAGCTGTCAGAGAA<br>GAGC                                                                               |

|                        |                                                    |    |            |      |   |                                                                                                                                                                             |
|------------------------|----------------------------------------------------|----|------------|------|---|-----------------------------------------------------------------------------------------------------------------------------------------------------------------------------|
| ex3_53<br>15159_<br>x4 | ENST0<br>000036<br>5570.1                          | 50 | 5E-07      | 44.1 | 4 | TAGCATATGATGGAAAAATCTTAATCTTCTGAGACTTGTGATGTCTTCAAAGGAACCA<br>CT                                                                                                            |
| ex3_53<br>15399_<br>x4 | ENST0<br>000036<br>2567.2                          | 20 | ####<br>## | 40.1 | 4 | CCTGGACCTGTTGGCACCACAGACAGTTGCTCTGCTGTGCCTGTGGCCTCGGGGCA<br>AAGA                                                                                                            |
| ex3_53<br>15555_<br>x4 | CM000<br>665.2/1<br>834525<br>67-<br>183452<br>732 | 19 | 9E-06      | 38.2 | 4 | ACCTTCTTGTTTAAGCTCTGTACTAAAATTGCAGAACTAGTATCGTGTCTTACCATTT<br>GTAATAAAGCTATCAGAGAAAACCCAAGGAAAAAACAGCTGTACCAGATAGAAAA<br>CTGAGTTGAACCTTTTTTTTTTCTTTTTTTTAGATGGAGTCTCACTCTGT |
| ex3_53<br>16495_<br>x4 | ENST0<br>000036<br>3064.1                          | 20 | 2E-06      | 40.1 | 4 | GAAAATACATGATGATCTCACTCCAACCTGGAACCTCTCACTGATTACTTGATAACAA<br>TA                                                                                                            |
| ex3_53<br>17615_<br>x4 | ENST0<br>000045<br>9229.1                          | 21 | 5E-07      | 42.1 | 4 | GCCCTGTGGTTGCTGGATGCTGTTGTGCATGGACAGCTCTCCAGTGGATTTCGATGG<br>GCCA                                                                                                           |
| ex3_53<br>17767_<br>x4 | AB070<br>559.1/4<br>340-<br>4471                   | 31 | 1E-12      | 61.9 | 4 | CUGCGAAUUAUUCUCGUCUGUUCUGAUUUUGUAAUAGUCAGGACAGGCUAAACAUUC<br>GCUAUUAUUAAGACCAUGCAUGUGUCCCCAAACCUAGUUCUUUCCCUAGGUCUGGU<br>UUUAUAAAUGCUGGUGAUAAAC                             |
| ex3_53<br>18363_<br>x4 | CM000<br>663.2/1<br>714819<br>07-<br>171482<br>009 | 14 | 0.009      | 28.2 | 4 | ATCCTTTTGTAGTTCATAAGTGTGATGATTCAGTGTTCACATGAATCTATGAGATGCG<br>CCAACCTCAAACCTTGTTATGACGTGGTCCATTACCCATCTGATG                                                                 |

|                        |                                                  |    |       |      |   |                                                                                                                                                                                                                           |
|------------------------|--------------------------------------------------|----|-------|------|---|---------------------------------------------------------------------------------------------------------------------------------------------------------------------------------------------------------------------------|
| ex3_53<br>20910_<br>x3 | ENST0<br>000041<br>0438.1                        | 23 | 4E-08 | 46.1 | 3 | TTCCAAAGTGTTAAGTTCAGTTCAGGGTAGCTTCCCTGCTCTGTTAATTAACCTTTG<br>AA                                                                                                                                                           |
| ex3_53<br>21276_<br>x3 | Z15025<br>.1/1294<br>5-<br>12815                 | 14 | 0.008 | 28.2 | 3 | UCCUCCUACAAAGGCGUGUCUGUGGUUCCUGUCUUUGGACAUGUAAGAAUUGG<br>AGAAAAUAAAUGUGGAUUUGGGAAACUUUGAGGCCAGCUUGCUUCUUGCAGGCUC<br>AUGAUCAACCAAUCUCACAUAA                                                                                |
| ex3_53<br>21618_<br>x3 | ENST0<br>000045<br>9157.1                        | 22 | 1E-07 | 44.1 | 3 | ATCCTTTTGTAGTTCATGAGCGTGATGATTGGGTGTTACATGCATGTGTGAGATGTG<br>CC                                                                                                                                                           |
| ex3_53<br>22956_<br>x3 | ENST0<br>000039<br>1141.1                        | 22 | 1E-07 | 44.1 | 3 | AACATGCTTCCTTAGATCCACCTTTGTGGATGAATCTTGAAGTACTGAGTTCCACTTGTA<br>AC                                                                                                                                                        |
| ex3_53<br>23415_<br>x3 | CM000<br>679.2/4<br>402522<br>3-<br>440250<br>20 | 15 | 0.003 | 30.2 | 3 | AAGCTTGTAAGTCTCAGTGATCATTGCTGTAGTTACGAGATAAGCTTCTCTGAACATGC<br>AGAGCAGTGGTAACTATGAGGAGGCACAGTCTCTCCTGAGCATGACTCTGGCTGTT<br>GGTGTGGCTTTGCTGCAGCTGCCGTGTGCCATTGATGATCCTGCTCCTCTTCCTTCG<br>GAAAAGTAAGAGGGAGAGAACAGTCTGAGTGGG |

|                        |                                                  |    |            |      |   |                                                                                                                                                                                                                                         |
|------------------------|--------------------------------------------------|----|------------|------|---|-----------------------------------------------------------------------------------------------------------------------------------------------------------------------------------------------------------------------------------------|
| ex3_53<br>23568_<br>x3 | CM000<br>677.2/3<br>685264<br>0-<br>368528<br>59 | 14 | 0.008      | 28.2 | 3 | AAGACGATACTTTCAAGAATCATGATCATTCTATACAGTTCATTACTAGAAAAGTTTCT<br>CTAAACATGTAGAGCGCTGGAAGCCATGAGGAGGAGTCTCAGTGTTGTTGCCTGAG<br>CATGAAGCAGACTCTTGTTGCTTCACTGCAACCACCATGTACCATTGATGATGGTTCT<br>TCTCTTCTCCAGGAGAGTAAGAGGGAAAGAATTCAGTCTGAGTGGT |
| ex3_53<br>24168_<br>x3 | AJ6094<br>64.1/1-<br>132                         | 28 | 6E-11      | 56   | 3 | UUCCACAGCUACUGGUCUGCAGCUGUUCUUAUGGUAGCAGUUGUGGCAUCCUC<br>UGUGGGAAAGAAACUGUUAACACAAACACCUCUUUCUUAAGCAAACAGAAAGUGG<br>GUAUUAUUGUGUGACAGACACAA                                                                                             |
| ex3_53<br>26193_<br>x3 | ENST0<br>000060<br>6526.1                        | 27 | 2E-10      | 54   | 3 | TCACTATGATGATTGGTTGCCAGACATTCGCAGTTTCCACCAGAAATGTTTTTCCTTA<br>TG                                                                                                                                                                        |
| ex3_53<br>26697_<br>x3 | ENST0<br>000051<br>6419.1                        | 20 | ####<br>## | 32.2 | 3 | TACTCCAGCCTGGATGACAGAGCCAGACTCTGTCTCGAAAAAAAAAAAAAAAAAAGC<br>TTA                                                                                                                                                                        |
| ex3_53<br>27180_<br>x3 | AL132<br>709.5/1<br>53488-<br>153414             | 20 | 2E-06      | 40.1 | 3 | UGGACCAGUGAUGGUGACUGGUGGUGUGUGAGUCAUGCACAGUGAAUAUCAUGU<br>GUCUGGAACUCUGAGGUCCAA                                                                                                                                                         |
| ex3_53<br>27267_<br>x3 | ENST0<br>000040<br>8569.2                        | 16 | 0.000<br>8 | 32.2 | 3 | TTGTATTTTTTGTAGAGATGGGGTCTCTCCCATGGGCACAGTCTCATTGTTTCTATAG<br>TT                                                                                                                                                                        |

|                 |                                  |    |            |      |   |                                                                                                                                                                                                                     |
|-----------------|----------------------------------|----|------------|------|---|---------------------------------------------------------------------------------------------------------------------------------------------------------------------------------------------------------------------|
| ex3_53_27285_x3 | AJ6094_52.1/1-137                | 15 | 0.005      | 30.2 | 3 | UACCAAAAGUUAGCUUUUUGGGGGGCAGGUUUUUAAGUAACCUUUGCCAACUUGG<br>GCUAUUUUGGAAGAGUAAAAGACCACACUCCACAGUGGGCUAUACCACUUAGUAUA<br>GUUCGCUACUAAUUUUGUGGCCUACAUG                                                                 |
| ex3_53_29685_x3 | AY055_806.1/1-75                 | 29 | 2E-11      | 58   | 3 | GGUUCAUGAUGACACAGGACCUUGUCUGAACAUAAUGAUUUUCAAUUUUGAGCUU<br>AAAAUGACACUCUGAAAUC                                                                                                                                      |
| ex3_53_30039_x3 | AM055_743.1/3-203                | 25 | 3E-09      | 50.1 | 3 | UCCAGCAGUAGUCAGCCAUCGGACAGAACCGUCCUGUGAUGGUGUUACACUGC<br>UGGGAGAGGAAUGUCUUGUCUUCAUCCGGUUGCCUGCGCCACUGUUCUGGUGGC<br>GUCUGGCACUGGUGCAAGACAGAGCUGUGCUUCCCCGAGAGUGUGCUAAGCAUU<br>CACUUUGGCUGCUUAGUUCUAGUCUGGGAGCAGACAGA |
| ex3_53_30738_x3 | CM000_672.2/5-659603-1-565959-63 | 20 | ####<br>## | 40.1 | 3 | TGATGAATTGATGACAGTCATCTTTTGAGAGTGACCCAAAATGAAAAGAATACTCATT<br>GCTGATCACTT                                                                                                                                           |
| ex3_53_31167_x3 | AP005_270.2/1-24772-124639       | 20 | 2E-06      | 40.1 | 3 | UGCCUCUGACCUUGGGUAGAGUGGCAUCUGGCUGUGACAUUCAUCUCAUAUCAGC<br>CAGGGACAAAGCAACCCCUUGUUUAUUUCAGCUUGGCCUUUUGUCUGUGCCAUG<br>CCUGGUUCAUGCCUUGGACACACUA                                                                      |

|                        |                                                  |    |       |      |   |                                                                                                                                                                                                                                                                                                   |
|------------------------|--------------------------------------------------|----|-------|------|---|---------------------------------------------------------------------------------------------------------------------------------------------------------------------------------------------------------------------------------------------------------------------------------------------------|
| ex3_53<br>32196_<br>x3 | AC104<br>360.8/6<br>2127-<br>61997               | 39 | 3E-17 | 77.8 | 3 | GCCGAGACUAGAGUCACAUCCUGACACAACUCUUGUCCUGGUGUGCUAGAGUACU<br>CGAAGAGAAUCUACUGGUCUUGAUUACUGGUGGGGGCAGUCGGUGCCCCCGUU<br>AGUGCCCAGAU CAGAAACAUAC                                                                                                                                                       |
| ex3_53<br>32235_<br>x3 | CM000<br>667.2/8<br>030636<br>8-<br>803062<br>35 | 14 | 0.008 | 28.2 | 3 | ATACATCTGTTTGACAGACCTAGTGCAATTACTGGGTGCTGCTAAGGTTCTCACTACA<br>GATGCAAGAAAAAGGTGTCATTGTCCTTTCTGTCTGTCTTATTGTGGTAGCCAAGACT<br>GAATAGAGGAAAACAGAG                                                                                                                                                    |
| ex3_53<br>32679_<br>x3 | ENST0<br>000038<br>6037.1                        | 20 | 2E-06 | 40.1 | 3 | CAGGCTGTGATGATTGGCGCAGGGGTACGGACCTCAGCTGAGTCATGGGAGCTGAA<br>TGTA                                                                                                                                                                                                                                  |
| ex3_53<br>33174_<br>x3 | AJ6094<br>39.1/1-<br>126                         | 30 | 5E-12 | 60   | 3 | UACCCCUUUUCACUUGCCAGUUGGACUUAUGUCUUUAUUGGUCAUUAAGUGG<br>GGCAAAGGAAUAUCCUUUUAAAACUCAGGCAAACUGGGUGUUUGUCUGUAUCCU<br>GUCAGAGGAAACAAAU                                                                                                                                                                |
| ex3_53<br>33282_<br>x3 | AY077<br>737.1/2<br>-276                         | 21 | 5E-07 | 42.1 | 3 | GGUCGUGAUGAUUGGUAAAAGGUCUGAUUGCACUGAAUGUCACAGUCCCUUUGU<br>UGCCCUAACUCCAGCAGCCCAUUUUUCCCUCCCGUCACAUUAAGUCAUGUG<br>UAUGGGAUCAUGGAGCAGCUGAUAAUUUGGGAUUCUGUCAGUGUGUUUCUGA<br>GAGUGAUCGACUCACAGCUGACGAGUAUCCAACAAAACCAGUUACACAGGAGACU<br>GACGAGUGGCAGUCAUGGGUGUGAUGGUGCAUGAUCUCAAGUUUUCAAUCUGAG<br>ACC |

|                        |                                                  |    |            |      |   |                                                                                                                                               |
|------------------------|--------------------------------------------------|----|------------|------|---|-----------------------------------------------------------------------------------------------------------------------------------------------|
| ex3_53<br>33480_<br>x3 | ENST0<br>000039<br>1112.1                        | 25 | ####<br>## | 50.1 | 3 | ATACTATGATGGTTGCATAGTTCAGCAGATTGAATTCATGAAGAGATTTACAATGTCT<br>GA                                                                              |
| ex3_53<br>35010_<br>x3 | ENST0<br>000063<br>6729.1                        | 18 | 0.009      | 28.2 | 3 | ATCATTATTGTTATTATTATATTTTTGAGAAGGAATCTCACTCTGTGCGCCAGGCTGGA<br>G                                                                              |
| ex3_53<br>35274_<br>x3 | AJ6094<br>70.1/1-<br>125                         | 15 | 0.004      | 30.2 | 3 | GCGCUCACUAAGGCUCGGUCCUCUCCACGUGGUCCUGACCUGUCCUCUGUGAGC<br>AAGAGAAACAGGACUGGUUUUGGGGUGUCCUGUCUCAGUGGACACAGGACACCA<br>CGGUUUUCAGUACAACA         |
| ex3_53<br>35703_<br>x3 | CM000<br>681.2/3<br>305140<br>3-<br>330515<br>04 | 20 | 2E-06      | 40.1 | 3 | AAGACTGTACTTCCAGGGATCATTCTACAGTTCGTTACTAGAGAAGTTTCTCTGTAC<br>GTGTACAGCAACCGTTTATATTAGTGTGGCACACACCTATCTGA                                     |
| ex3_53<br>40992_<br>x3 | ENST0<br>000058<br>4275.1                        | 30 | 4E-12      | 60   | 3 | GCCATATGATGTTTTCTTTTCGAAAGGTGAGCGCTTTGCGCAGTGATGACCCTCATCT<br>AT                                                                              |
| ex3_53<br>42183_<br>x3 | AC121<br>336.3/1<br>55535-<br>155667             | 14 | 0.008      | 28.2 | 3 | UUGGGCAGUGAACACCCAAGUGUGCUUUUAUAGUCCUUUGGCUUUGACUUUGUG<br>CUAGAGCAAUGUCUGUUAUUUUUCUCUGCAUUGAAAGGAGCAUUUAUCCUUUUAA<br>AUGUAUUCAGAAAGCCAGUACAUU |
| ex3_53<br>42216_<br>x3 | AF001<br>689.1/2<br>296-<br>2367                 | 28 | 6E-11      | 56   | 3 | GGUGCAGAUGAUGACACUGUAAAGCGACCAAAGUCUGAACAAAGUGAUUGGUACC<br>UCGUUGUCUGAUGCACC                                                                  |

|                        |                                                  |    |            |      |   |                                                                                                                                                                                 |
|------------------------|--------------------------------------------------|----|------------|------|---|---------------------------------------------------------------------------------------------------------------------------------------------------------------------------------|
| ex3_53<br>43884_<br>x3 | AJ6094<br>84.1/1-<br>166                         | 22 | ####<br>## | 44.1 | 3 | CAGCACUUGAUACUAACCGAGCUGUCUAUAUCCUAGCCUUGUGUCAAGGCUUGU<br>GAUGUGUUGUGAUAGCUGGGUUUAAGAAGUGCAAUAUAAAACAAAAGCCAUGAG<br>UCUUUUAAGCCCAGUGUGUAAAGAUACACUCUGAGUUUAACUCAGAGGCACAAC<br>U |
| ex3_53<br>44556_<br>x3 | CM000<br>678.2/5<br>694655<br>7-<br>569464<br>46 | 14 | 0.008      | 28.2 | 3 | AAGACTATACTTTTCAGGGATCATTCTGTGGTTGGTTACCAGAGAAGTTTCTCTGAAC<br>ATGTAGAGCACTGGTAAAAAAAAATAAATAAGAAATCATTATTTATTTTTTGA                                                             |
| ex3_53<br>44850_<br>x3 | AK027<br>197.1/1<br>806-<br>1940                 | 21 | ####<br>## | 42.1 | 3 | CCGCAGCCAAUUAAGCCGACUGAGUUCUUCUUCUCAUGGGGACCCAGUGUGCGA<br>UGGCUGCACACAGCAGCUUCCUUGGUAGUGUACGCAGCCUGUUGGUUGUAUGGG<br>UUGCUGUAAGGGACCUUGGAGACAGGC                                 |
| ex3_53<br>46206_<br>x3 | AM055<br>742.1/1<br>-134                         | 14 | 0.009      | 28.2 | 3 | UUGCAUGUGGAAAUGUCUGCUUCUCAUUCUUGGGAGCAGGAAUAUGUUCAUAAC<br>AUGCUACAUUAACAAAGGAGUUCUCAGGGCUGCCAACCUUCUAGUAAAGGUUGAG<br>UGGUAGUAUUAUUUCUCCAACAUA                                   |
| ex3_53<br>46824_<br>x3 | ENST0<br>000040<br>8237.1                        | 24 | 1E-08      | 48.1 | 3 | GGGGTGTGCTCAGAGCAGGGGGCCTAAAGAATGGCTCCTCTGTTTATAACACACCC<br>AACA                                                                                                                |
| ex3_53<br>47712_<br>x3 | CM000<br>685.2/2<br>350731<br>3-<br>235072<br>11 | 16 | 0.001      | 32.2 | 3 | ATCCCTTTATAGTTCCCAGCATGACGATTGGGTGTTACATGCATGTGTGAGATGT<br>ACCACCCTCGCATCTTGTTAGACGTTGGCACATTACCCGTCTGACC                                                                       |

|                 |                                  |    |       |      |   |                                                                                                                                                         |
|-----------------|----------------------------------|----|-------|------|---|---------------------------------------------------------------------------------------------------------------------------------------------------------|
| ex3_53_49062_x3 | AL132_709.5/1_33438-133369       | 15 | 0.005 | 30.2 | 3 | UGGUUCAGUGUUGACUACUGGUGUCGUGUGAGUCAUACAAUGAAUACAUGUCUG<br>GAACUCUGAGGCCCAU                                                                              |
| ex3_53_49551_x3 | BA000_025.2/1_06547-106465       | 35 | 5E-15 | 69.9 | 3 | UGGGAGUGGUAAUGAUGAUCUGGUUUGGACAAGAGUCUCUGAGCUUUUCUCUGAG<br>GAUCUUUGAACCCACCUGAUCCACCUUCA                                                                |
| ex3_53_50328_x3 | AC005_682.2/1_10683-110610       | 21 | 5E-07 | 42.1 | 3 | UGGCCAAGGAUGAGAACUCUAAUCUGAUUUUAUGUGCUUCUGCUGUGAUGGAUUA<br>AAGGAUUUACCUGAGGCCA                                                                          |
| ex3_53_54342_x3 | AK095_831.1/7_58-827             | 35 | 5E-15 | 69.9 | 3 | GGUGAAAUGAUGAAUUCUGGGGCGCUGAUUCAUGUGACUUGAAAAUGCCAUC<br>AUUUCUGAUUCACC                                                                                  |
| ex3_53_55161_x3 | ENST0_000038_6683.1              | 51 | 3E-24 | 101  | 3 | GGATTTGTGATGAGCTGTGTTTACTGAGCATGATGAAGTAAAGCTCAACGTGATTACT<br>CT                                                                                        |
| ex3_53_55389_x3 | CM000_677.2/9_241754_7-924176_89 | 14 | 0.009 | 28.2 | 3 | AAGCATGGCACACTGGATGGGCGTTCTGCTTCTCTTTAAAGAGCATGGATTTATCCA<br>TACCATGTGACATGAATGAAATGAGGAGTTTTTCAGGGCTGCCAACCTCTTGTTAAG<br>GTTCTGTGTAGTATATTTCTCCTACAATA |
| ex3_53_57768_x3 | ENST0_000036_5074.1              | 14 | 0.008 | 28.2 | 3 | CTGCAGATATTCTCACTGTTTTGATTTTGTAAATAGTCAGGACAGGCTAACCATTCACT<br>TT                                                                                       |
| ex3_53_59205_x3 | ENST0_000045_9159.1              | 25 | 3E-09 | 50.1 | 3 | TGGCGATGAGGAGGTACCTATTGTGTTGAGTAACGGTGATAATTTTATACGCTATTCT<br>GA                                                                                        |
| ex3_53_59622_x3 | ENST0_000039_0930.1              | 32 | 3E-13 | 63.9 | 3 | GTGAAATGATGATTCAGTTTATCCATTCGCTGAGTGCGCTGCACTGACCTTCTTCCAA<br>GC                                                                                        |
| ex3_53_60951_x3 | ENST0_000038_4744.1              | 23 | 4E-08 | 46.1 | 3 | GCATGGTAATGGATTTATGGTGGGTCCTTCTCTGTGGGCCTCTCATAGTGTACCCAT<br>GCC                                                                                        |
| ex3_53_66009_x3 | AL132_709.5/1_48004-             | 22 | 1E-07 | 44.1 | 3 | UGGACCAAUUAUGACUACUGGUGUGAGUCACGCAUAAUGAACACCACGUGUCUGG<br>AACUCUGAGGUCCAA                                                                              |

|                 |                        |    |       |      |   |                                                                                                                                                            |  |
|-----------------|------------------------|----|-------|------|---|------------------------------------------------------------------------------------------------------------------------------------------------------------|--|
|                 | 147935                 |    |       |      |   |                                                                                                                                                            |  |
| ex3_53_66444_x3 | ENST0000606577.1       | 33 | 8E-14 | 65.9 | 3 | GGTCCTGGTGATGACAGATGGCATTGTCAGCCAATCCCCAAGTGGGAGTGAGGACA TGTC                                                                                              |  |
| ex3_53_68949_x3 | CM000673.2/1193234     | 15 | 0.006 | 30.2 | 3 | GTTGGATGAAAATCATCCCAGGGCTTTGCCAGTGGCCGCGAGTGCCCAGAGCTTCCA GGGGCCTCAGCTCACCATGCACTGCCCCGTGTGTGGCAGTGAAACCCAGGCCCTGA CAGGC                                   |  |
| ex3_53_71481_x3 | CM000675.2/4623577     | 14 | 0.008 | 28.2 | 3 | ATCCTTTAGTAGTTCATAAGCATGATGATTGGCTTTTTATGCTCATGAATAAAATATGC CTCCCTCAAGCCTTTTTATGACATTGGCACATTACCCATCTGACG                                                  |  |
| ex3_53_71553_x3 | CM000679.2/1955756     | 30 | 4E-12 | 60   | 3 | GCCCAGGGTATGTTACGGGGCGATGCTGCCCTCCCAGCTGGCCCATGGGTGACC CTGGGAACATTAAGTGCCTCACAAACGTTTGTGCCTCAGTTACCCGTAGATGTAGTGA GGGTAACAATACTTACTCTCGTTGGTGATAAGGAACAGCT |  |
| ex3_53_72723_x3 | AJ609482.1/1-130       | 24 | 1E-08 | 48.1 | 3 | UGGACAUUUUUUUUUUUUUCAGUUUCUUCUCAAGGUGAAGAUAAACUCUUUGUAAAU GUCCUACAGAAAUAUAGUAGCUUUCUGUUCUUCUUUGCAAGUAAAAAGGGUGGG UCGUCCACUACUGACAUUU                       |  |
| ex3_53_75912_x3 | AC010582.6/81476-81337 | 14 | 0.008 | 28.2 | 3 | UGAUGACUGUUCUUCUGUUGCCUUCAGACCUGGCAUUAGGAUUUUUAGGUCAUCA UAAAUUAAAAUUUGAUUUUCUUCACUCAGAGAAUUAUUAGGAUAAUGGAGUUAUCUG UUCUCUGAAAUUUGCGGAUCAACAUGU              |  |
| ex3_53_76545_x3 | ENST0000384183.1       | 14 | 0.008 | 28.2 | 3 | TTTCTCATTTGACTACCACATTTTCTCCTAATAATAGATTTTAGTGGCTATGCTTATGG G                                                                                              |  |
| ex3_53_77472_x3 | ENST0000363524.1       | 22 | 1E-07 | 44.1 | 3 | CCCTCCTACAAAGGCATGTCTATAGTTCCTTGTCTTTGGACATGTAAGAATTGGAGGC AA                                                                                              |  |
| ex3_53_78771_x3 | AJ609427.1/1-137       | 14 | 0.008 | 28.2 | 3 | UUGGCCUGAAUCAAGGCCAGCAGUUUGCUGAAGCUGUUGGUUUCAAGCAGGAG CCUAAAGAAUUGUCUUUCUAUGGUCUGUUGGCCAUUUUCAUAAACUUUGGAAUUGUA AUGGUCAAUUCAUUAGAAAGAAACAUGA               |  |
| ex3_53_80508_x3 | AP001324.4/9           | 18 | 3E-05 | 36.2 | 3 | ACAGAUGAUGAACUCAUUGACAGACAUACAGAGACUGUGUGCUGAUUGUCAUGUU CUGACUUA                                                                                           |  |

|                 |                              |    |       |      |   |                                                                                                                                        |  |
|-----------------|------------------------------|----|-------|------|---|----------------------------------------------------------------------------------------------------------------------------------------|--|
| x3              | 5881-95819                   |    |       |      |   |                                                                                                                                        |  |
| ex3_53_81276_x3 | ENST0000364729.1             | 21 | 5E-07 | 42.1 | 3 | TCCTGCATCCGAAAGTGATCATAGGCTGCCTGTGCCTAGGTCATTGATAGTGCAGGGAGA                                                                           |  |
| ex3_53_84213_x3 | ENST0000459083.1             | 36 | 1E-15 | 71.9 | 3 | GGTGCAAATGATGCATATGTTAGCGACCAAAGCCTGATCTTTGCTGATTAGTCATAATA                                                                            |  |
| ex3_53_84429_x3 | CM000670.2/99292971-99293049 | 25 | 3E-09 | 50.1 | 3 | AAGACTATACTTTTCAGGGATCATTCTATAGTTTGTACTAGAGAAGTTTCTCTGAACGTGTAAAGCACCATTTAAAGT                                                         |  |
| ex3_53_84639_x3 | BC028232.1/151-277           | 15 | 0.006 | 30.2 | 3 | GUUGGUUGAAAAUCGCCCCCGCCUUUGCCGUGGCCGCGGGUGAGAUUCGGCGCCAGAGCCCCCGGGGCCUCAGCUCACCCGCGCGCUGCCCCAUGUGCGGCGGUGA                             |  |
| ex3_53_87045_x3 | AL132709.5/183412-183335     | 29 | 2E-11 | 58   | 3 | UGGAUCA AUGAUGAGUAUUGGUGGAGGUGUCUGAAUCAACACUUUUGAUUAAGCC CUCUGUGUAACUCUGAGAUCUGU                                                       |  |
| ex3_53_87750_x3 | ENST0000515966.1             | 14 | 0.009 | 28.2 | 3 | GCCCTATGTTAAAATTTTAATTCTGCACTTACTAACTATCTTGGGAACCTTGGGCAAGTA                                                                           |  |
| ex3_53_88677_x3 | ENST0000365465.1             | 22 | 1E-07 | 44.1 | 3 | AATCAATGATGAAACCTATCCCAAAGCTGATGACCTGAAGAAAAATACGTACAGATTCAG                                                                           |  |
| ex3_53_89316_x3 | CM000685.2/100822620         | 21 | 1E-06 | 42.1 | 3 | TAGCAAGCCTCCAGCATGCTTAGGTCTGCAGTGACCCTATGCATCCCTACAGTGCTTGCCAGAACAGTTTTGAAACGGTTTGAGGCCTTGCCCTGCTCCATCCAGAGCAAGGGTATAGAAATTTTCAGACAATT |  |
| ex3_53_89364_x3 | AB028893.1/10920-11006       | 23 | 4E-08 | 46.1 | 3 | GGCAGAUGAUGUUUGUUUUCACGAUUGGUCUUCAGAUGCCCACGUGGGCACUGCUGAGAAAGCCACUUGGUAAAACUGAUGCCGAAA                                                |  |
| ex3_53_89583_x3 | ENST0000362805.1             | 21 | 5E-07 | 42.1 | 3 | GGGCAATGATGAAAAGGTTTTACTACTGATCTTTGTA ACTATGATGGTTTCTACTTGA                                                                            |  |

|                        |                                                  |    |            |      |   |                                                                                                                                                                                                                                |
|------------------------|--------------------------------------------------|----|------------|------|---|--------------------------------------------------------------------------------------------------------------------------------------------------------------------------------------------------------------------------------|
| ex3_53<br>90084_<br>x3 | AJ0103<br>96.1/58<br>4-712                       | 34 | 2E-14      | 67.9 | 3 | CGGCAGACAGUUAUCCCUUUCUAGUCUGGCUCGUGGGACUCUAGAGGGAGUCAG<br>UCUGCAACAGUAAGUGGUGAGUUCUUCUGUCCAGCGUCAGUAUUUUGAUGGUGG<br>CUUUAGACUUGCCAGAUACA                                                                                       |
| ex3_53<br>90909_<br>x3 | AY349<br>597.1/1<br>-142                         | 37 | 4E-16      | 73.8 | 3 | UUGCCCGAUGAUUUAUAAAAGACGCGUUUAUAAGAGGACUUUAUGCUGGAGUUCU<br>UGACGUUUUUCUCUCUUUUCUAUACUUCUUUUUCUUUCUUUGAAUGUCCAGCGUC<br>CUGUGAGCGAAGAUUAUGAGAUUAUGAGGGCAA                                                                        |
| ex3_53<br>91206_<br>x3 | CM000<br>676.2/6<br>365149<br>9-<br>636512<br>96 | 15 | 0.002      | 30.2 | 3 | AAGACCATATTTTCAGGGATCATTTCTATAGTTCATTACTAGAGAAGTTTCTCTG<br>AACATGCAGGGCACCGCAAACCATGAGGAAGAGGCACAGCATTCTTCTGAGCCT<br>GAAGCCAGCTCTTCTTGCTTCACTGCCATTTGCCCTTCATGATCATTCTCTTCTGCA<br>GGAGAGTAAGAAAGGATGCAGTCTGAGTGGT              |
| ex3_53<br>92031_<br>x3 | ENST0<br>000036<br>3315.1                        | 36 | 1E-10      | 56   | 3 | CTGAGCTGAGGATGATTTAAAGTTATCCCTGTCTGAAATGGTATCTTTTGTGAGGAGG<br>TC                                                                                                                                                               |
| ex3_53<br>94563_<br>x3 | CM000<br>673.2/9<br>373064<br>6-<br>937305<br>13 | 33 | 8E-14      | 65.9 | 3 | GGGTCATTTCAAAGAGGGCTTATGAGGCTGTGAAACCCAGAGCTCTTAACGCTGTGA<br>CCAAAGATGGAAGTTCTCTATAGGAAGCCATAGCACTCCTAATGTTTGGTGCTATGTT<br>TTCCTGAGGAGATATAAAA                                                                                 |
| ex3_53<br>95136_<br>x3 | CM000<br>681.2/4<br>994952<br>7-<br>499493<br>16 | 16 | 0.000<br>8 | 32.2 | 3 | AAGATGACACTTTGAGGCATCGTGTCTATGGTTCATTACTACAGAAGCTTCTCTGGAT<br>GTGTAAGCACAGGAAACCAGGCAGAGGAGGCACAGGGTGCTCTCCAGAACGAGAA<br>GCCAGCTCCTGGAGTTGTTTGCTGCAACTGCCATTCCCGTTGATGACCATGCTCTT<br>CCTTCAGAAGAGGGAGAGTGAGAGGACCAAGTCCAAGTGGT |
| ex3_53<br>95412_<br>x3 | CM000<br>673.2/6<br>699562<br>5-<br>669954<br>78 | 18 | 0.008      | 28.2 | 3 | AGGACTGTACTTTCAAGGATCATTTCTATAGTTTATTACTAAAGAAGTTTCTCTGAACA<br>TATAAAGCAAACATTTTTTAAGAAGAAAAAATAGACCAGATGCTGTGGCTGCACTT<br>GTAGTCCCAGCACTTGGGTAGGCTGAGGTAG                                                                     |
| ex3_54<br>00827_<br>x3 | AY841<br>870.1/3<br>444-<br>3579                 | 28 | 6E-11      | 56   | 3 | GCAUGGGUUUGGAUUUAUGACAGGCCCGUCACCCUGGGCCUGUCAUAGUACCCC<br>AUGCCAGAGCAAACUGUGUCCCCGAACCAUUGCCUGGCCUCUGUGCCCGUAGGC<br>UGCUGGCACUGAAGUGGGUUGCACAGUG                                                                               |
| ex3_54<br>00968_<br>x3 | CM000<br>668.2/8<br>871443                       | 25 | 3E-09      | 50.1 | 3 | TCAGCTTGAGTCACTCTTCCCAGGCTTTATCCAGGTGGCTTAGGTTAGCTAGGGCTG<br>TGTCCCCTGATGTACAGTCCCTTTACACAATGTTGGAGATAAACTTGGCCTCATGTC<br>TTGCTTCATATCCACAGCCTCTCAGAGTCCTGTGGACAATGACTAGGGAGACAAA                                              |

|                        |                                                |    |       |      |   |                                                                                                                                                                                                                                                              |
|------------------------|------------------------------------------------|----|-------|------|---|--------------------------------------------------------------------------------------------------------------------------------------------------------------------------------------------------------------------------------------------------------------|
|                        | 0-<br>887142<br>42                             |    |       |      |   | CCATGCAAGCAACATAT                                                                                                                                                                                                                                            |
| ex3_54<br>01379_<br>x3 | AJ6094<br>53.1/1-<br>134                       | 21 | 5E-07 | 42.1 | 3 | UGCAGCCGUGUCAAAUUCAGUACCUGUCCUAUGCAUGGUAGGCACUGGCCAGAA<br>GGCUGCCACAGAAACACUGUGACUCAUGGGCCUGUUCUGUGUCCAGGCUCA<br>GGGAUAAAUUUGGUUACAGACAUCA                                                                                                                   |
| ex3_54<br>01580_<br>x3 | CM000<br>668.2/5<br>314792                     | 15 | 0.004 | 30.2 | 3 | AAGACTATACTTTCAGGGATCATTCTATAGTTTGTACTAGAGAAATTTCTCTGGACA<br>TCTAGAGCACACAAAAAAGAAAAAGGAACTTCATTCTTA                                                                                                                                                         |
| ex3_54<br>02579_<br>x3 | KV880<br>768.1/1<br>517190<br>-<br>151695<br>3 | 15 | 0.002 | 30.2 | 3 | AGTCACCTTTAAAAAAGGCAGGTCCCCAGCAGCCCATTTTTTTTTTCTCCCATCAC<br>ATTTAAGTCATGTGTATGGGATCATGAAGGAGGTGATAATTTGGGGTTTTTTCAGTGT<br>ATGTTTCTGAGAGTGAATGGTTCACAGCTGACGAGTATCCAACAGAACCAGTTACAC<br>AGGAGATTGAGGAGTGGCTGTGATGGCTGTGACAGTGCATGATCTCAAGTTTTCAAT<br>CTGAGACC |
| ex3_54<br>03236_<br>x3 | AM055<br>729.1/1<br>-131                       | 28 | 6E-11 | 56   | 3 | GGGGUGUGCUCAGAGCAGGGGGCCCAAAGAAUGGCUCCUCUGUUUACAACACAC<br>CCAACAGGAAUCUGGGGUCAUUGUGAUGAGGGCGUCAAAUCUUGUGGCUCUCCUA<br>UGAACAAACGUCCCCAACACCU                                                                                                                  |
| ex3_54<br>03299_<br>x3 | ENST0<br>000039<br>1196.1                      | 34 | 2E-14 | 67.9 | 3 | GATCACGGTGATGGCTGACCAGGGCTCCCTGACCTATACAGGCCTCTGCTATGGGG<br>GTGA                                                                                                                                                                                             |
| ex3_54<br>03677_<br>x3 | AJ6094<br>57.1/1-<br>135                       | 30 | 4E-12 | 60   | 3 | CUGCAUUCUUAACCCUCUUGGUAGCUUCGUUCUAAGUGCUUCCAAGAUUAGAGU<br>GAAUGCUAUAGAAUUGCAGGGGAGUCCAAAGGGCUGCGCUUCUCCCGUGGCUC<br>AGUCUUUUUUAUACCUUGCGACAUCU                                                                                                                |
| ex3_54<br>04349_<br>x3 | ENST0<br>000036<br>3497.1                      | 26 | 8E-10 | 52   | 3 | TGGACCAATGATGAGATTGGAGGGTGTCTGAATCAAAAATTTTGATTAAGCCATCTG<br>TA                                                                                                                                                                                              |
| ex3_54<br>04622_<br>x3 | AL445<br>624.3/8<br>0903-<br>80775             | 20 | 2E-06 | 40.1 | 3 | CUAGCAUUUUCACAGGUCCUCCCUCAGGCUAUGGGGCCAGGAUUUGGUAGCUGG<br>UGCUGAGAGAAAACGCUUGAUUGCAUCCUUGCCUUGGGACUGUGCCAGUGGCAG<br>CUGUCACUCAUUGGGACAAU                                                                                                                     |
| ex3_54<br>04958_<br>x3 | ENST0<br>000038<br>4158.1                      | 26 | 8E-10 | 52   | 3 | GTCTTCTCATTGAGCTCCTTTCTGTCTATCAGTGGCAGTTTATGGATTTCGCACGAGAA<br>GA                                                                                                                                                                                            |
| ex3_54<br>05183_<br>x3 | CM000<br>682.2/4<br>927894                     | 21 | 5E-07 | 42.1 | 3 | GCTGGTGTAATGATGACTTCACTTTTTTCCCATCAGATCGACAATGCTGACGTCTT<br>ATATTTTGCCAGTTAGTTCTGATACATCGGC                                                                                                                                                                  |

|                        |                                     |    |       |      |   |                                                                                                                                                                                                                                 |  |
|------------------------|-------------------------------------|----|-------|------|---|---------------------------------------------------------------------------------------------------------------------------------------------------------------------------------------------------------------------------------|--|
|                        | 0-<br>492790<br>28                  |    |       |      |   |                                                                                                                                                                                                                                 |  |
| ex3_54<br>05762_<br>x3 | ENST0<br>000045<br>9584.1           | 20 | 2E-06 | 40.1 | 3 | GGGCTAATGATGGAAAAATCATTATTGGAAAAGAATGACATGAACAAAGGAACCACT<br>GAA                                                                                                                                                                |  |
| ex3_54<br>06020_<br>x3 | CM000<br>663.2/8<br>559228          | 19 | 1E-05 | 38.2 | 3 | GAAAATACATGATGATCTCACTCCAACCTGGAACCTCTCTCACTGATTACTTGATAACAA<br>TAAATATCTGATATTCTG                                                                                                                                              |  |
|                        | 0-<br>855923<br>56                  |    |       |      |   |                                                                                                                                                                                                                                 |  |
| ex3_54<br>06245_<br>x3 | CM000<br>667.2/1<br>385590          | 23 | 4E-08 | 46.1 | 3 | GTGCCGTGATGTATTTGTCAACACATCACTCTGAAGAAAAGTATGTGGTGACTTTCTG<br>TGACTGAGCATG                                                                                                                                                      |  |
|                        | 39-<br>138558<br>970                |    |       |      |   |                                                                                                                                                                                                                                 |  |
| ex3_54<br>07261_<br>x2 | AC007<br>448.14/<br>61996-<br>61858 | 24 | 1E-08 | 48.1 | 2 | UGCACUGCAUGGCAUCUGCACCCAGCAGUUUACUCUUGCUAAGGUGUUCAAAGGU<br>CAGUGCUAUAGAAUUCAGUAUCUGGCAUCAUUGGUUUUCUUGACUUUGUGCUUG<br>UUAACCUAGUAUUUCUAUUGAUACAGUA                                                                               |  |
| ex3_54<br>07571_<br>x2 | AB028<br>893.1/3<br>795-<br>3879    | 20 | 2E-06 | 40.1 | 2 | GCGGCCGGUGAUGAGAACUUCUCCACUCACAUUCGAGUUUCCCGACCAUGAGAU<br>GACUCCACAUGCACUACCAUCUGAGGCCAC                                                                                                                                        |  |
| ex3_54<br>07589_<br>x2 | AC104<br>843.3/8<br>1519-<br>81640  | 14 | 0.009 | 28.2 | 2 | GCACCCUUUAAGGCUGAUGCAAUGCUUUAAGAGGCCUAACACAGAAGGGUGAAGC<br>CAGUCUCCUUAAAACCCAAAGAAGAGAUUGUAAAACUUCUCUUUGGCUCCUGUCU<br>GGAGUCACAGCU                                                                                              |  |
| ex3_54<br>08009_<br>x2 | CM000<br>667.2/1<br>496959          | 15 | 0.004 | 30.2 | 2 | AAGACTCTACTCTCAGGGCTCATTTCTGTCAATCAATACTAGAGAAGTTTCTCTGAAT<br>GTTTAGAGCACTGGAAACCAACGGAGGAGGCCGGGCATTCTTTCTGAGCATGCAG<br>CCAGCTCATAGTGTTGTTTTGTTGCAGCTGCCGCTTGCCATTGATGATCCTTCTTCTC<br>TTCCTTCAGGGGAGTAAGGAGACGACGCGGTCTTAGTGGT |  |
|                        | 59-<br>149695<br>748                |    |       |      |   |                                                                                                                                                                                                                                 |  |
| ex3_54<br>08443_<br>x2 | CM000<br>672.2/4<br>995421          | 20 | 3E-06 | 40.1 | 2 | TCCAGCAGTAGTCAGCTGTCTGGACAGAACCATTCTGGGATGGTGTTACACTGCTG<br>GGAGAAGAATGTCTTCTCTTCATCCAGTTGCCTCCATCACTGTTCTGGTGGTGTCTG<br>GCACTGGTGCAAGGCAGAAGTGTGCTTCTTGAGAGTGTGCTGAGCATTACCTTG<br>GCTGCTTGGTTCTAGTCTGGGAGCAGACACA              |  |
|                        | 4-                                  |    |       |      |   |                                                                                                                                                                                                                                 |  |

|                 |                                  |    |            |      |   |                                                                                                                                                                                                |  |
|-----------------|----------------------------------|----|------------|------|---|------------------------------------------------------------------------------------------------------------------------------------------------------------------------------------------------|--|
|                 | 499544                           |    |            |      |   |                                                                                                                                                                                                |  |
|                 | 14                               |    |            |      |   |                                                                                                                                                                                                |  |
| ex3_54_08831_x2 | ENST0_000036_4597.1              | 14 | 0.009      | 28.2 | 2 | GGCGGCCCTTATCACAGCTGCAGCTGCTTCCACATAGCTGCTGCGGTCAAAAAGGA<br>GCCC                                                                                                                               |  |
| ex3_54_09069_x2 | ENST0_000036_5609.1              | 14 | 0.009      | 28.2 | 2 | TCACTGTGATGATGGTTTTTCAACGTTTCCACCAGAAAGATTTTCCTTAGT<br>GT                                                                                                                                      |  |
| ex3_54_09663_x2 | ENST0_000045_8892.1              | 15 | 0.006      | 30.2 | 2 | TGGCAACTGTGATGAAAGATTTGGTCTGTATGTAATAGATTTTATTACTAAATGAGGA<br>CA                                                                                                                               |  |
| ex3_54_09675_x2 | AL132_709.5/1_80473-180397       | 26 | 8E-10      | 52   | 2 | UGGAUCAAUGAUGAGUAUGCGUGGGGCAUCUGAAUCAAAUUAUUCUGAUUAUACCC<br>UGUCUGUAUCUCUGAGGUCCAU                                                                                                             |  |
| ex3_54_09861_x2 | ENST0_000051_6310.1              | 14 | 0.008      | 28.2 | 2 | GTTGGATGAAAATCATCCCGGGCTTTGCCAGTGGCCGCGAGTGCCCAGAGCTTCCA<br>GGGG                                                                                                                               |  |
| ex3_54_09925_x2 | ENST0_000038_4418.1              | 26 | 2E-07      | 44.1 | 2 | GCCCGCCTTGGCCTCCCAAAGTGCTGGGATTCTTACATCGACTGCATAGAAAGAGG<br>AGAG                                                                                                                               |  |
| ex3_54_10175_x2 | AC112_907.7/6_2863-62686         | 27 | 2E-10      | 54   | 2 | ACCUUCUUGUAUAAGCACUGUGCUAAAAUUGCAGACACUAGGACCAUGUCUUGGU<br>UUUUGCAAUAUAGCUAGCAGAGUACACACAAGAAGAAAAGUAACAGCACUAGAUUG<br>UAAAGACUGGGGUGGACCUCUUUCUUAUUGUCCAAUGUCCUUUGUCUUAAGAUUU<br>GGUGCAAUAUCU |  |
| ex3_54_10383_x2 | AP000_033.1/3_1795-31930         | 29 | 2E-11      | 58   | 2 | GCAUGGGUUUGGAUUUAUGAUGGGCCCGUCCCCUGGACCUCUCAUAGUACCCC<br>AUGCCAGAGCAAACUGUAGCCCUGAACCAUUGCCUGGCCUCUGUCCCCGUAGGCU<br>GCUGGCACUGAAGUGGGUUGCACAAUA                                                |  |
| ex3_54_10609_x2 | CM000_681.2/1_143915_9-114392_75 | 17 | 0.000<br>1 | 34.2 | 2 | AGCCTCCCAAAGTGCTAAGCCGCCGCGCTTGGCCACGATGATTAGTTTTTATGCAC<br>GTGTGAGAGATACGCCTCCCTTAAACCTTGTTGCGACCTTGGCGCATTACCTGTCTG<br>ATA                                                                   |  |
| ex3_54_10617_x2 | AL132_709.5/1_82043-181969       | 36 | 1E-15      | 71.9 | 2 | UGGACCAGUGAUGAAUAUCAUGGGGUUUCUGAAACAACAUUUUUGAUUAAACCCA<br>UCUGCAACUCUGAGGUCCAU                                                                                                                |  |
| ex3_54          | CM000                            | 35 | 6E-15      | 69.9 | 2 | AAGACTATACTTTCAGGGATCATTCTATAGTTTGTACTAGAGAAGTTTCTCTGAACG                                                                                                                                      |  |

|                 |                                                            |    |            |      |   |                                                                                                                                             |
|-----------------|------------------------------------------------------------|----|------------|------|---|---------------------------------------------------------------------------------------------------------------------------------------------|
| 10853_x2        | 676.2/8<br>527193<br>2-<br>852720<br>10                    |    |            |      |   | TGTAGAGCACTAAAATGCTA                                                                                                                        |
| ex3_54_11467_x2 | AC093<br>462.11/<br>145947<br>-                            | 21 | 5E-07      | 42.1 | 2 | UGAGCACUUUCACAGGUCCUCCCUCAGGCUGUGGGGCCAGGAUUUGGUAGCUGG<br>UGCUGAGAGAAAACCUUUGUUGGCAUCCUUGCCCUGGGACUGUGCCAGUGGCAG<br>CUGUCAUUCAAUGGGACAAUU   |
| ex3_54_11513_x2 | 146075<br>CM000<br>663.2/2<br>857882<br>2-<br>285787<br>49 | 38 | 1E-16      | 75.8 | 2 | ACTGGTCCAGGATGAAACCTAATTTGAGTGGACATCCATGGATGAGAAATGCGGATA<br>TGGGACTGAGACCAGCT                                                              |
| ex3_54_11583_x2 | CM000<br>668.2/2<br>543528<br>0-<br>254354<br>01           | 16 | 0.000<br>7 | 32.2 | 2 | ATCCTTTTGTAGTTCATGAGGGTGATGGTTGGGTGTTACGCACGTATGTGAGATGT<br>GCTACCCTCGAACCTTGTTAAAGAAAAAAAAAAGCTAATATTGTATTAGTATATATCTGT<br>GTGACT          |
| ex3_54_12957_x2 | AL132<br>709.5/1<br>37723-<br>137652                       | 40 | 7E-18      | 79.8 | 2 | UGGAUCGAUGAUGACUACUGGUGGCGUAUGAGUCAUAGACAAUGAAUACGUGUCU<br>GGAACUCUGAGGUCCA                                                                 |
| ex3_54_13501_x2 | ENST0<br>000039<br>1286.1                                  | 22 | 1E-07      | 44.1 | 2 | GTGCCCTTTTAAGGTTGACCCAGTGCTTTAAGAGGCTAACACAGAAGGGTAAAGTAA<br>GTC                                                                            |
| ex3_54_13671_x2 | ENST0<br>000036<br>4957.1                                  | 25 | 0.000<br>2 | 34.2 | 2 | ACTCCAGCCTGGCTGACAGAGTGGGACCCCATCTCAAAAAAAAAAAAAAAAAAATTAAGC<br>TGG                                                                         |
| ex3_54_13851_x2 | CM000<br>678.2/6<br>863035<br>4-<br>686302<br>23           | 31 | 2E-05      | 38.2 | 2 | TGAGATGAGATCATGCCATTGCACTCCAGCCTGGACGACAGAGCGAGACTTCATCTC<br>AAAAAAAAAAAGGATCCTCAGGGCTGCCAACCTTATAGTAGAAGTTGAGGTGGTAG<br>TGGATTTCTCCTACACAA |
| ex3_54_14627_x2 | AL132<br>709.5/1                                           | 22 | 1E-07      | 44.1 | 2 | UGGACCAAUGAUGACCACUGGUGGCGUUUGAGUCAUGGACGAUGAAUACUACGU<br>GUCUGAAACUCUGAGGUCCA                                                              |

|        |              |    |       |      |   |                                                              |  |
|--------|--------------|----|-------|------|---|--------------------------------------------------------------|--|
| x2     | 68250-168176 |    |       |      |   |                                                              |  |
| ex3_54 | CM000        | 15 | 0.004 | 30.2 | 2 | AAGACTCCTTTCAGGAATCATTCTTTAGTTCCCTACTAGAGAGGCTTCTCTTAACATGT  |  |
| 14695_ | 668.2/9      |    |       |      |   | GGAGCGCTGGAAACCACAAAGAGGAGGTGCAGCATTTCAGTTCTAAGTGTGAAGTGG    |  |
| x2     | 279045       |    |       |      |   | ATTCTTGGTGTGGCTGTGCTGCAACTGCCATTTGCTAATGATGACCTTGCTTTTCTTA   |  |
|        | 3-927906     |    |       |      |   | CTTAGAGTAAGACAGAGAGACAGCAGTCAGCCTAAGCGGT                     |  |
|        | 65           |    |       |      |   |                                                              |  |
| ex3_54 | ENST0        | 29 | 2E-11 | 58   | 2 | ATGTAATAATGTTTCATCAAATGTCTGACCTGAAATGAGCATGTAGACAAGTTAATTTAA |  |
| 15311_ | 000039       |    |       |      |   | C                                                            |  |
| x2     | 1076.1       |    |       |      |   |                                                              |  |
| ex3_54 | ENST0        | 14 | 0.009 | 28.2 | 2 | CAAATACATGATGATCTCACCTCAGTTTGAACCTCTCTCACTGATCACTTGATGACAAT  |  |
| 15465_ | 000036       |    |       |      |   | AA                                                           |  |
| x2     | 5153.1       |    |       |      |   |                                                              |  |
| ex3_54 | ENST0        | 15 | 0.002 | 30.2 | 2 | GTGCACATTGTTACATTGGGAGAAAAGATATTTCTGATGTGATGAATAAATTTTTGGA   |  |
| 15705_ | 000051       |    |       |      |   | GA                                                           |  |
| x2     | 6013.1       |    |       |      |   |                                                              |  |
| ex3_54 | CM000        | 18 | 0.008 | 28.2 | 2 | AAGACTATACTTTCAGGAATTGTTTCTGTAGTACATTACTAGAGAATGTCCTCTGAAT   |  |
| 16847_ | 685.2/1      |    |       |      |   | GTGCAGAGCACAGAAAATAACAAAATAATAAATTCCAAATCAGCTATCTGAGTA       |  |
| x2     | 509021       |    |       |      |   |                                                              |  |
|        | 21-150902    |    |       |      |   |                                                              |  |
|        | 235          |    |       |      |   |                                                              |  |
| ex3_54 | ENST0        | 22 | 1E-07 | 44.1 | 2 | GGGCAATGATGTAAAGGTTTTACGACTGACCTTTGTAACATGAAGTTTTCTACACTT    |  |
| 17493_ | 000036       |    |       |      |   | GA                                                           |  |
| x2     | 5012.1       |    |       |      |   |                                                              |  |
| ex3_54 | ENST0        | 18 | 0.009 | 28.2 | 2 | GGGTGGTGATGAGAACCTTGTATTCTTCTGAAGAGAGGTGATGACTTAAAAACCATG    |  |
| 18063_ | 000036       |    |       |      |   | CTC                                                          |  |
| x2     | 3931.1       |    |       |      |   |                                                              |  |
| ex3_54 | ENST0        | 46 | 2E-21 | 91.7 | 2 | GGATCGATGATGAGTCCCCAAAAAACATTCCTTGGAAAAGCTGAACAAAATGAGT      |  |
| 18453_ | 000038       |    |       |      |   | GAA                                                          |  |
| x2     | 4274.1       |    |       |      |   |                                                              |  |
| ex3_54 | CM000        | 15 | 0.004 | 30.2 | 2 | AAGACTATACTTTCAGGGATCATTCTATAGTTCGTCCTACTAGAGAAGTTTCTCTGAAC  |  |
| 18865_ | 665.2/1      |    |       |      |   | GTGTAGAGCACTGATGCAGCCAAAAACACATGAAAAATGCTCATCATCACTGGC       |  |
| x2     | 831750       |    |       |      |   |                                                              |  |
|        | 07-183174    |    |       |      |   |                                                              |  |
|        | 894          |    |       |      |   |                                                              |  |
| ex3_54 | ENST0        | 14 | 0.009 | 28.2 | 2 | TGGACCAGTGATGGTGACTGGTGGTGTGTGAGTCATGCACAGTGAATATCATGTGTC    |  |
| 19015_ | 000036       |    |       |      |   | TGG                                                          |  |

|                        |                                                    |    |       |      |   |                                                                                                                                           |
|------------------------|----------------------------------------------------|----|-------|------|---|-------------------------------------------------------------------------------------------------------------------------------------------|
| x2                     | 3738.1                                             |    |       |      |   |                                                                                                                                           |
| ex3_54<br>20585_<br>x2 | AC068<br>057.5/6<br>2929-<br>63057                 | 15 | 0.002 | 30.2 | 2 | CUGAGAAUAUCUUGCUGUUCUGAUUUUGUAAUAGGACAGGCCUAUAAAGAUUGGCU<br>AUUUUAAGGCCACGCACAUGUCCCCAGACUUAUUUCUUUCCCUAGGUCUGUUUU<br>AUAAACUCUGGUAAUAAAC |
| ex3_54<br>20709_<br>x2 | ENST0<br>000036<br>5032.1                          | 22 | 2E-07 | 44.1 | 2 | GCCTGCATTTCGTAAGTGATCACGGGCTGCCCGTGCCTGGTCATTGGTAGTGCAGG<br>CAGA                                                                          |
| ex3_54<br>21799_<br>x2 | CM000<br>685.2/1<br>508112<br>74-<br>150811<br>384 | 18 | 0.009 | 28.2 | 2 | AAGACTCTACTTTTCAGGGATCATTCTGTAGTTTGTATTAGAGAAGATTCTCTGAAG<br>GTGTAGAGCATCAAAAATAAAAATAAAATTTTAAAAAGGAAATAGAAAATCTGA                       |
| ex3_54<br>21973_<br>x2 | AF250<br>841.1/4<br>124-<br>4215                   | 28 | 6E-11 | 56   | 2 | GGAUCGAUGAUGACCUCAAUACAUGCAUUCUUGGAAAGCUGAACAAAAUGAGUG<br>AAAACUCUAUACCGUCGUCCUCGUCAAACUGAGGUCC                                           |
| ex3_54<br>22077_<br>x2 | ENST0<br>000039<br>1162.1                          | 30 | 4E-12 | 60   | 2 | AGTTGTGGTGGTTTTCTTTTTGGCACATTTGTTAAGTTTTCAAATGGGCCTAACTCTG<br>CC                                                                          |
| ex3_54<br>22787_<br>x2 | AC013<br>722.8/1<br>84033-<br>183920               | 27 | 2E-10 | 54   | 2 | ACUGAGGAAUGAUGACAAGAAAAGGCCGAAUUGCAGUGUCUCCAUCAGCAGUUUG<br>CUCUCCAUGGGCACACGAUGACAAAUAUCCUGAAGCGAACACUAGUCUGACCU<br>CAGU                  |
| ex3_54<br>23065_<br>x2 | AF250<br>841.1/6<br>375-<br>6466                   | 31 | 1E-12 | 61.9 | 2 | GGAUCGAUGAUGACUUUUUAUACAUGCAUUCUUGGAAAGCUGAACAAAAUGAGUG<br>AAAACUCUAUACCGUCAUCUUCGUUGAACUGAGGUCC                                          |
| ex3_54<br>23559_<br>x2 | ENST0<br>000038<br>4765.1                          | 35 | 5E-15 | 69.9 | 2 | GACCTCCTGGGATCGCATCTGGAGAGTGCCTAGTATTCTGCCAGCTTCGGAAAGGG<br>AGGG                                                                          |
| ex3_54<br>24695_<br>x2 | CM000<br>668.2/1<br>342065<br>14-<br>134206<br>411 | 15 | 0.002 | 30.2 | 2 | ATCCCTTTGTCGTTTATAAGTGTGATGATTGGGTTTTTCATGTTCTGTGTGAGATATG<br>CCTCCTTCAAGCCTTGTTATGATGTCTGCACATTACCTGCCTGTCA                              |
| ex3_54<br>24967_       | CM000<br>663.2/1                                   | 15 | 0.004 | 30.2 | 2 | AAGACTATACTTTTCAGGGATCATTATATGATTTGTGGCTACAGAAGTTTCTCAGCGT<br>GAGGAGCCCCAGAAACCATGAGGAGGAGACGCAGCATTCTCTGTGGCGCGTGAGG                     |

|                        |                                                    |    |            |      |   |                                                                                                                                      |
|------------------------|----------------------------------------------------|----|------------|------|---|--------------------------------------------------------------------------------------------------------------------------------------|
| x2                     | 162786<br>06-<br>116278<br>821                     |    |            |      |   | CCAGCTCTTGGTTTTACTTCGCTACAACCTGCATTTGCCATTGGTGATCGTTCTTCTCT<br>CATCTCAGGGAGAGTAGAAGGGAGAGAAGATGCAGCCTGAGTGAT                         |
| ex3_54<br>25441_<br>x2 | CM000<br>664.2/2<br>153027<br>66-<br>215302<br>864 | 14 | 0.008      | 28.2 | 2 | ATCCTTTTGCAGTTCATAAGCATGAAGTTTGGGTTTTACATGCATCTGTGAGAAATA<br>CCTTCCTCAAACCCTGTTACAATGGTGGCTCACATCTGTAA                               |
| ex3_54<br>26487_<br>x2 | ENST0<br>000038<br>6747.1                          | 37 | 4E-16      | 73.8 | 2 | GCTGTTCGTTGATGAGGCTCAGAGTGAGCGCTGGGTACAGCGCCCGAATCGGACAG<br>TGTA                                                                     |
| ex3_54<br>26797_<br>x2 | CM000<br>675.2/3<br>242051<br>6-<br>324203<br>90   | 15 | 0.005      | 30.2 | 2 | AATTGGGATCAAAGATGCAGCCGCCTTCCCATTAAAGCAGCACAGACAGCCCAAAGT<br>GACAGTTTTCTGTACAGTTACTCTTCTGTTATCTGTAAGTCTATGACATTTTGGG<br>AAAAACAGCC   |
| ex3_54<br>27505_<br>x2 | ENST0<br>000051<br>7059.1                          | 16 | 0.000<br>6 | 32.2 | 2 | TCAAATGAGCCTGAGCTGACATTGTAGAGGATGTAGATGGCTGAAGAACTGTTTCAG<br>CTG                                                                     |
| ex3_54<br>27525_<br>x2 | AC005<br>214.1/1<br>4143-<br>14018                 | 21 | 5E-07      | 42.1 | 2 | AAACCCUGUUCACUUUGCCAAAUGGAUUUGUGUCUUUAUUGCUCAUUAAUUGGG<br>GCAAAGGAAAUUCCUUUUAAAACUCAGGCAAACUGAGUGUUUGUCUUGUAUCCU<br>GUCAGAGGAAAGAAAU |
| ex3_54<br>27585_<br>x2 | ENST0<br>000036<br>4009.1                          | 21 | 5E-07      | 42.1 | 2 | TCACAATGATGAATGGTCCAAAACATTCGCGGTTTCCACCAGAATTCAAGGTGTTGG<br>CAA                                                                     |
| ex3_54<br>27709_<br>x2 | ENST0<br>000036<br>4672.1                          | 16 | 0.001      | 32.2 | 2 | AAGGCAGCATTGTTGTAGATGATTTGAAAGATTTTAAAGGTATAAGCTCACAAGTGT<br>AG                                                                      |
| ex3_54<br>28301_<br>x2 | ENST0<br>000051<br>6006.1                          | 15 | 0.005      | 30.2 | 2 | GGATCGATGATGACTATAAAAAAATGGATCTCATCGGAATCTGAACAAAATGAGTGA<br>CC                                                                      |
| ex3_54<br>28433_<br>x2 | CM000<br>672.2/6<br>122619<br>6-<br>612262         | 17 | 0.000<br>2 | 34.2 | 2 | AGTGTATGATGACACCTTGGTAATGCTGCAGACTCCTCAGTGTGCAGTGAAGAGGTG<br>AACTTTGAAGAGTCACA                                                       |

|                 |                                                    |    |       |      |   |                                                                                                                                                                                                                                                                                         |  |
|-----------------|----------------------------------------------------|----|-------|------|---|-----------------------------------------------------------------------------------------------------------------------------------------------------------------------------------------------------------------------------------------------------------------------------------------|--|
|                 | 69                                                 |    |       |      |   |                                                                                                                                                                                                                                                                                         |  |
| ex3_54_28729_x2 | CM000<br>663.2/2<br>868966<br>5-<br>286897<br>94   | 14 | 0.008 | 28.2 | 2 | TGGACATTTATTTTTATTCAGTTTTTTCTCAAGGTGAAGGTAAGTGTGGTAGATGTCC<br>TAGAGAAATATTGTAGCTTTCTGTTCAACCTTTGCAACTAAAAAGCATGGACTGTTCC<br>ACTACTGAGATTT                                                                                                                                               |  |
| ex3_54_29451_x2 | ENST0<br>000040<br>8473.2                          | 15 | 0.002 | 30.2 | 2 | TAGGCGGCTTTCAGGGATCATTCTATAGTCTGCTACTAGAGTACTTTCTGTGAAAGT<br>GT                                                                                                                                                                                                                         |  |
| ex3_54_30489_x2 | CM000<br>674.2/5<br>664510<br>1-<br>566450<br>27   | 22 | 1E-07 | 44.1 | 2 | CCTTCTATGATGATTTTATCAAATGACTTTTCGTTCTTCTGAGTTTGTGGAAGCCACAT<br>TTAGGTAAGTACTGAGAAGG                                                                                                                                                                                                     |  |
| ex3_54_31049_x2 | ENST0<br>000045<br>9477.1                          | 15 | 0.003 | 30.2 | 2 | CTGCATGTGGAAATGTCTGTTCTTCATTCTTTTAGGAGCAGGAATACATATAGATATA<br>AA                                                                                                                                                                                                                        |  |
| ex3_54_31075_x2 | CM000<br>665.2/1<br>560088<br>80-<br>156008<br>801 | 15 | 0.003 | 30.2 | 2 | TAGACTATACTTTTCAGGGATCATTCTACAGTTTGTACTAGAGAAGTTTCTCTGAATG<br>TATAGAGCACCGAAGACAAGC                                                                                                                                                                                                     |  |
| ex3_54_31615_x2 | AY077<br>738.1/1<br>-265                           | 25 | 3E-09 | 50.1 | 2 | GGUCAUGAUGAAUGGUAAAAGGUCUGAGUCCUCAGAUCCCCUCCCGGCAUCCCA<br>GUUAUCCCCAGCUGCCUCUCCUCCAUCGCACUUCAGAAGUGCUGCGAUGGGCAG<br>AAGGGCAGCUGACACUCCGUGAUGUCCCUCAUUCUGUGUCCUCCGUGAGCUCA<br>GGGAAGACACUGGUUGGCAUCCAACAGCUUAGUCACAAAGGGAUUUGAUUUGUUGG<br>GAGUGCUGGUAUCUGUGGCUAUGAUCUGCCUUGUUAAGCUGAGACC |  |
| ex3_54_32217_x2 | CM000<br>665.2/1<br>834538<br>14-<br>183453<br>944 | 14 | 0.009 | 28.2 | 2 | AGGCAGGATCTAGTTACATTGTAGCTGTGAAGTGTGCTGCATTGTCTTTGCCCCCTGCT<br>CAAAATAAACTGTTACCTTTCAAGCCCTGTCTGCCATGGTGCTGTAGCAGCAGGGA<br>TGTTTGGTCTCATAACAT                                                                                                                                           |  |
| ex3_54_32317_x2 | ENST0<br>000051<br>6449.1                          | 18 | 0.009 | 28.2 | 2 | TCCCATCTCTTAAATAAAAAGATTTTTTTTTTTAAGAAGTTGTACATGTGCAATGGCTGC<br>A                                                                                                                                                                                                                       |  |
| ex3_54          | AJ6094                                             | 46 | 2E-21 | 91.7 | 2 | CUCCAUGUAUCUUUGGGACCUGUCAGCCGUGGCAGUCUCCCUUCCUAGCCAUGG                                                                                                                                                                                                                                  |  |

|                 |                               |    |       |      |   |                                                                                                                                                   |
|-----------------|-------------------------------|----|-------|------|---|---------------------------------------------------------------------------------------------------------------------------------------------------|
| 32435_x2        | 78.1/1-124                    |    |       |      |   | AAGAGCAUAUCCUUGUUUUAUUGGCAAAGCUGUCACCAUUUAAUUGGUAUCAGAUUCUGACUUGCACAAGU                                                                           |
| ex3_54_32591_x2 | AC112 497.4/53124             | 15 | 0.004 | 30.2 | 2 | UACCUCCCAGGAUGGCAUCUGGAAGUGGAUAGUAUUCUGCCAGCUUUGGAAACUGGAUGAAAAGCAAUCUGGCAGAGGUACCCAUUUCAUUCCCAGCUUGCUCAGUAGCUGGUGAUUGGAAGAAACUCUGCAACAGUG        |
| ex3_54_32727_x2 | AC008 083.23/27997-28128      | 14 | 0.009 | 28.2 | 2 | GGCCUCUCAGUGCCGCUJAAUCACACAGGUCCAGUGUGUGCUUGGUGUCUUUUCUGGGAGGCAGAGGAAGGCUCUCCUAAUCACAACAGACCUGCCCAGAAGGGCCUCUCUAUUUCUAGGAGUAUGAUAGCU              |
| ex3_54_32943_x2 | CM000 668.2/51464690-51464765 | 14 | 0.008 | 28.2 | 2 | GTCCTCTGATGACTTCATGTTAGTGCCACCTGTCTGGGCCACGGAGAACCCATGATGGAAGTCTGAGGAA                                                                            |
| ex3_54_33091_x2 | CM000 676.2/2032326-20323179  | 28 | 6E-11 | 56   | 2 | TGATGGCTGTTCTCTCACTGCTTGAAGCCTTAGGCAGTGGGATTTTATCCATCATAATCAAAAATGGCTTATCTTCACTCAGGGCACCATGAGGATGGGCTGGCTGTCCGTTAGTGCCTTCTGATTTTTGCGGAGTCAAACAATT |
| ex3_54_33467_x2 | ENST0 0000391075.1            | 15 | 0.005 | 30.2 | 2 | GTAGGTGACGACCAATATTTTTTTTACTTTGACTTGATGTCTATTGAAGAAATCTAGCAT                                                                                      |
| ex3_54_34207_x2 | AL132 709.5/152651-152577     | 35 | 7E-15 | 69.9 | 2 | UGGACCAAUGAUGACAAAUACCGGCGUAUGAGUCUUGGAUGAUGAAUAAUACGUGUCUGGAACUCUGAGGUCCAU                                                                       |
| ex3_54_35349_x2 | ENST0 0000408535.2            | 32 | 3E-13 | 63.9 | 2 | GCGCTGTCTTTGAGCCCCCGCCGAGCTTCTCGTGGCGCCGGGGTCAATCTGCA GCGCT                                                                                       |
| ex3_54_35655_x2 | CM000 679.2/7577955-7578091   | 21 | 5E-07 | 42.1 | 2 | ATCCAAGGTGATTCCCTCTCCAAGGGGACATCAGTGCCTCTCAGGAAAGTAGCAGCTTGGAATAGAATCTGGCATGCCTAAGGCCTTTGGGGAAGTGGGATGCTTATTTCTCTGCCTTCCTTGCTGCCACATGG            |
| ex3_54_36555_x2 | ENST0 000039                  | 15 | 0.005 | 30.2 | 2 | GTCCTCTGATGACTTCATGTTAGTGCCACCTGTCTGGGCCACGGAGAACCCATGATGGAA                                                                                      |

|                        |                                      |    |            |      |   |                                                                                                                                      |  |
|------------------------|--------------------------------------|----|------------|------|---|--------------------------------------------------------------------------------------------------------------------------------------|--|
| x2                     | 1230.1                               |    |            |      |   |                                                                                                                                      |  |
| ex3_54<br>37409_<br>x2 | AL132<br>709.5/1<br>67225-<br>167151 | 14 | 0.008      | 28.2 | 2 | UGAGCCAGUGAUGAAAACUGGUGGCAUAGAAGUCAAGGAUGCUGAAUAAUGUGUG<br>UCUAGAACUCUGAGGUUCA                                                       |  |
| ex3_54<br>38505_<br>x2 | ENST0<br>000060<br>7417.1            | 15 | 0.004      | 30.2 | 2 | CAGCATTGTGCAATGGCCTTTGGTTTTTCTTGTAACCAGTTAGGTCTGAAACCAATGC<br>AA                                                                     |  |
| ex3_54<br>38555_<br>x2 | ENST0<br>000038<br>3906.1            | 23 | 5E-08      | 46.1 | 2 | GCATGGGTTTGGATTTATGACAGGCCCGTCACCCTGGGCCTGTCATAGTACCCCATG<br>CCA                                                                     |  |
| ex3_54<br>39005_<br>x2 | ENST0<br>000045<br>9623.1            | 28 | 6E-11      | 56   | 2 | TTTTGGTTGAAATATGATGAGTGACAAAATCTTGATTTAAGTGAATGAAAAATTACAA<br>G                                                                      |  |
| ex3_54<br>39241_<br>x2 | ENST0<br>000045<br>9473.1            | 29 | 2E-11      | 58   | 2 | GGTGAAAATGATGAATTCTGGGGCGCTGATTCATGTGACTTGAAAAATGCCATCCAT<br>TTC                                                                     |  |
| ex3_54<br>39803_<br>x2 | ENST0<br>000038<br>4107.1            | 26 | 8E-10      | 52   | 2 | TGCCTCATTCTAGAGAATGGGCACTGTTGATCATGGTGTCCAAAAATAGTTAATGTGG<br>CT                                                                     |  |
| ex3_54<br>40045_<br>x2 | AK124<br>098.1/2<br>478-<br>2557     | 21 | 1E-06      | 42.1 | 2 | AGCUUAUCAGUGAUGUUGUAAAAUAAAUGUCUGAACAUUAUGAAUGCAGUAUUGA<br>UUUCAGCAUUUAACUGAGAUAAAGCG                                                |  |
| ex3_54<br>41163_<br>x2 | ENST0<br>000036<br>4749.1            | 22 | 1E-07      | 44.1 | 2 | ATCCAAGGTGATTCCCTCTCCAAGGGGAACATCCAGTGCCCCTCTCAGGAAAGTAGC<br>AAC                                                                     |  |
| ex3_54<br>41517_<br>x2 | ENST0<br>000036<br>3807.1            | 14 | 0.008      | 28.2 | 2 | CTATTATGATGAGATTACGCTCTGTGGTCCGTGTTTCTGAAACACAGGATTTTGTGGA<br>AG                                                                     |  |
| ex3_54<br>41635_<br>x2 | ENST0<br>000036<br>4027.1            | 14 | 0.008      | 28.2 | 2 | TTTAGGAACAGCCTTTGAGGAAGCCTGTGTTTGTAGGGACATCTGAGAGTGTTGATG<br>AAT                                                                     |  |
| ex3_54<br>41789_<br>x2 | ENST0<br>000036<br>3922.1            | 39 | 3E-17      | 77.8 | 2 | GCATGGGTTTGGATTTATGATGGGCCCGTCCCCCTGGACCTCTCATAGTACCCCATG<br>CCA                                                                     |  |
| ex3_54<br>42331_<br>x2 | CM000<br>679.2/2<br>977761           | 17 | 0.000<br>2 | 34.2 | 2 | CTACAACCAGCTACTGGTTGATCTTACATTTGATCTGGTGTGCAATGGCTGCAACA<br>GCAGCCTCCTTGGTGGTGTTCGAGCCTGTTGCTTGTATGAGTTGCCCTAATGGACC<br>TTGGAGACAGCC |  |

|        |         |    |       |      |   |                                                             |  |
|--------|---------|----|-------|------|---|-------------------------------------------------------------|--|
|        | 297777  |    |       |      |   |                                                             |  |
|        | 44      |    |       |      |   |                                                             |  |
| ex3_54 | CM000   | 14 | 0.009 | 28.2 | 2 | GCCCGCCTTGGCCTCCCAAAGTGCTGGGATTCTTACATCGACTGCATAGAAAGAGG    |  |
| 42489_ | 683.2/4 |    |       |      |   | AGAGAACATAACCTACCTACCCCGTACATACTTCAGCCCAGGTCTGTGCCTCATCT    |  |
| x2     | 051314  |    |       |      |   | GTAATATGAATGAAGAGACATGG                                     |  |
|        | 4-      |    |       |      |   |                                                             |  |
|        | 405132  |    |       |      |   |                                                             |  |
|        | 79      |    |       |      |   |                                                             |  |
| ex3_54 | CM000   | 23 | 5E-08 | 46.1 | 2 | AAGACTATACTTTTCAGGGATCATTCTATAGTTCGTTACTAAAGAAGTTTCTCTGAACG |  |
| 42941_ | 671.2/8 |    |       |      |   | TGTAGAGCACCGGTACAAACAAATG                                   |  |
| x2     | 837426  |    |       |      |   |                                                             |  |
|        | 9-      |    |       |      |   |                                                             |  |
|        | 883743  |    |       |      |   |                                                             |  |
|        | 52      |    |       |      |   |                                                             |  |
| ex3_54 | CM000   | 14 | 0.009 | 28.2 | 2 | GTCCACTTGTAGTTCATAAGCAACATGATTTGGTTTTTCATGCTGATGTGTGAGATGTG |  |
| 43537_ | 663.2/2 |    |       |      |   | CCTCCCTCAAACCTTGTTACTATGTTGGCACATTACAAGTTTGACA              |  |
| x2     | 229119  |    |       |      |   |                                                             |  |
|        | 47-     |    |       |      |   |                                                             |  |
|        | 222911  |    |       |      |   |                                                             |  |
|        | 844     |    |       |      |   |                                                             |  |
| ex3_54 | CM000   | 15 | 0.002 | 30.2 | 2 | TGCACCTGTTTGAGGAATAAAGGAATTAAACTCCCAAAGAGGACAAATATTAACAA    |  |
| 44323_ | 679.2/6 |    |       |      |   | AAATGTATGGACAGACGCAAAAAACAAATCCTCATTGCAACCCAGAATAATTGTT     |  |
| x2     | 935528  |    |       |      |   | TAGTATGATTTTTGACACATATAAGAAGGAGTATT                         |  |
|        | 3-      |    |       |      |   |                                                             |  |
|        | 693551  |    |       |      |   |                                                             |  |
|        | 33      |    |       |      |   |                                                             |  |
| ex3_54 | CM000   | 15 | 0.004 | 30.2 | 2 | TAGACGATACTTTCAAGGATCATTCTATAGTTTGTACTAGAGAAATTGCTCTGAATG   |  |
| 44541_ | 680.2/5 |    |       |      |   | TGTAGAGCAGCAGAAATCACAAAGAGGAGGCGCAGCATCCTCCCCTGAGCATGTTG    |  |
| x2     | 695727  |    |       |      |   | CTTCCCTTCAACTGCGCTTTGCCATTACTGATGGTTCTTCTCTTCTCTGCGAGAGTA   |  |
|        | 0-      |    |       |      |   | AGAGGGAGAGGATGCAGTCTGAATGGG                                 |  |
|        | 569574  |    |       |      |   |                                                             |  |
|        | 69      |    |       |      |   |                                                             |  |
| ex3_54 | ENST0   | 15 | 0.003 | 30.2 | 2 | TGCACTTGTGTTTTTGTAACTGTGAACAAAGACTTATAGAGAAGTGCAAAAAATAAA   |  |
| 44813_ | 000039  |    |       |      |   | T                                                           |  |
| x2     | 0964.1  |    |       |      |   |                                                             |  |
| ex3_54 | CM000   | 16 | 0.001 | 32.2 | 2 | CTCCTTTTGCGGTTTATAAGCATGATGATTGGGTTTTTCATGTGTGAGATGTGTCTCCC |  |
| 44887_ | 677.2/9 |    |       |      |   | TCAAATCTTTTTATGAAGTAGATGCATTGTCTGTCTGACA                    |  |
| x2     | 183537  |    |       |      |   |                                                             |  |
|        | 9-      |    |       |      |   |                                                             |  |
|        | 918354  |    |       |      |   |                                                             |  |

|                 | 76                            |    |       |      |   |                                                             |                                                                                   |
|-----------------|-------------------------------|----|-------|------|---|-------------------------------------------------------------|-----------------------------------------------------------------------------------|
| ex3_54_45655_x2 | ENST0000515921.1              | 15 | 0.003 | 30.2 | 2 | CTATCTAGCAAATTTGGTTT                                        | AGAGGGAAAGTTTATAGTAGACTTTGCCAGCTGAAGTTG                                           |
| ex3_54_45859_x2 | CM000672.2/87994695-87994618  | 15 | 0.002 | 30.2 | 2 | CAGTCCAGCCTCTGATGAAGCCTATGTTAGTAGGCACATCTGAGTGGTAATGAATGC   | CAGCAGCTCTGATGAAAAAAA                                                             |
| ex3_54_46043_x2 | CM000678.2/726951-7726841     | 24 | 0.001 | 32.2 | 2 | AGCACTTGTATGTTTTAACATGTGGACATTTATAGACAGGTTCAAAAAGTCCTCTTGC  | AACCCAGAACTCGTTGTTTCAGTATGAGTCTTGATACGTGTAAGAAGGGATTTG                            |
| ex3_54_46301_x2 | AC116348.3/101703-101837      | 40 | 7E-18 | 79.8 | 2 | GCAUGGGUUUGGAUUUAUGAUGGGCUGGAUJCCCUAGGCCUCUCAUAGUACCCC      | AUGCCAGAGCAAACUGUAGCCCCAACCAUUGCCGGGCCUCUAUGCCUGUAGGCUGCUGGCACUGAAGUGGGUUGCACAGUA |
| ex3_54_47029_x2 | ENST0000580726.1              | 36 | 2E-15 | 71.9 | 2 | TCCAGCAGTAGTCAGCTGTCTGGACAGAACCATTCTGGGATCATGTTACACTGCTG    | GGA                                                                               |
| ex3_54_47921_x2 | ENST0000363181.1              | 44 | 9E-18 | 79.8 | 2 | GGTCAATGATGAGCTGACATGTATTCTGAATCTAAAGTTGATTATTAGTACTTTAGTTC | T                                                                                 |
| ex3_54_48117_x2 | AC004125.1/88446-88314        | 14 | 0.008 | 28.2 | 2 | AGCCUCUUUCUAGAUGAGAAUGGGCACUGUCGAUCAUGGUGUCUGAAAAUUGUAA     | GUGGCUAAAUUGAAACACAGGUUAUGCUUCCAUAAGAGUAUAUGUAUUGCAGUGGUGACAAUGAGACCUGUAACACUU    |
| ex3_54_48173_x2 | ENST0000458800.1              | 14 | 0.008 | 28.2 | 2 | ATTCAGATGCTGAATTTAACTGTTCAACTGCTGAACCACTCAACAGACATGAACGAAA  | GC                                                                                |
| ex3_54_49933_x2 | CM000663.2/11237104-112371107 | 15 | 0.006 | 30.2 | 2 | ATCCTTTTACAGTTCATAAGAGTGATGACTGGGTTTTCACTTTTCATGTGTAAGATGTG | CCTCCCTGAAACCTTGTTACAACATTGGCACATTACCCATCTGATG                                    |
| ex3_54          | ENST0                         | 14 | 0.009 | 28.2 | 2 | ACCAAGATTCAAGTCACATTCCGAGTGTCCCGGTGTGCTAGGGCACTTGCAGAGAAT   |                                                                                   |

|        |         |    |       |      |   |                                                               |
|--------|---------|----|-------|------|---|---------------------------------------------------------------|
| 50145_ | 000040  |    |       |      |   | CTG                                                           |
| x2     | 8166.1  |    |       |      |   |                                                               |
| ex3_54 | ENST0   | 14 | 0.008 | 28.2 | 2 | AAGACTATTCTTTCAGGGATCATTTCATGCTTTGCTACTAGAAAGTTTCTCTGAAAGTGT  |
| 50491_ | 000039  |    |       |      |   | A                                                             |
| x2     | 1296.2  |    |       |      |   |                                                               |
| ex3_54 | CM000   | 22 | 1E-07 | 44.1 | 2 | AAGCAGGATTCAGACTACAATATAGCTGTAAAGTGCTGTATTGTCATTCCCCCTGCTC    |
| 50947_ | 663.2/3 |    |       |      |   | AAATTAAGTTGTTTCTTAACATAACCCATCTGCTATTCTGTAGCAGCCAGGGATGCT     |
| x2     | 641857  |    |       |      |   | TGGTCACATACAT                                                 |
|        | 8-      |    |       |      |   |                                                               |
|        | 364184  |    |       |      |   |                                                               |
|        | 50      |    |       |      |   |                                                               |
| ex3_54 | CM000   | 14 | 0.009 | 28.2 | 2 | CTGCCAATATTCTCATTGCTCTGATTTTGTAAATAGTCAGGACAGCCTAACATTTGCT    |
| 51195_ | 670.2/1 |    |       |      |   | ATATTTTTTAAATTTTAAATTTTAAATTTTGTGGGTATAACATTCACTATATTAAGATCAT |
| x2     | 314329  |    |       |      |   | GCATGTGCCCCCAAACCTAATTCCTTTCTTAAGTCTAGTTTTATAAATGCTAATGATGA   |
|        | 55-     |    |       |      |   | AC                                                            |
|        | 131432  |    |       |      |   |                                                               |
|        | 776     |    |       |      |   |                                                               |
| ex3_54 | CM000   | 19 | 0.003 | 30.2 | 2 | AGCGTGAAGCTGGCTCTTGGTGCTCCTTCACTGAAAATGCCATTTGCCATTGATGAT     |
| 51671_ | 663.2/1 |    |       |      |   | CGCTCTTCCCTTCTCTGGGAGGAT                                      |
| x2     | 937319  |    |       |      |   |                                                               |
|        | 40-     |    |       |      |   |                                                               |
|        | 193731  |    |       |      |   |                                                               |
|        | 859     |    |       |      |   |                                                               |
| ex3_54 | CM000   | 30 | 4E-12 | 60   | 2 | ATCCTTTTGTAGTTCATAAACATAATGGTTGGGTGTTACGTGCGTGTGTGAAATGTGC    |
| 51711_ | 673.2/5 |    |       |      |   | CACCCTCCAGCCTTGTTACGATGTTGACACATTACCCATCTGACA                 |
| x2     | 732896  |    |       |      |   |                                                               |
|        | 1-      |    |       |      |   |                                                               |
|        | 573288  |    |       |      |   |                                                               |
|        | 59      |    |       |      |   |                                                               |
| ex3_54 | KZ208   | 14 | 0.008 | 28.2 | 2 | AAGACGATACTTTCAGGGATCATTCTGTAGTTTGCTACTAGAGAAGTTCCTCTAAAC     |
| 52371_ | 915.1/4 |    |       |      |   | GTGTAGAGAAAAAATGTTAAACAGGAATACATGAAGATCATCAAAGAATGGA          |
| x2     | 293352  |    |       |      |   |                                                               |
|        | -       |    |       |      |   |                                                               |
|        | 429346  |    |       |      |   |                                                               |
|        | 2       |    |       |      |   |                                                               |
| ex3_54 | BX640   | 14 | 0.008 | 28.2 | 2 | AGGUCACUCAAAGAGGGGCUUGUGGGGCGUGUGAAACCAAGGGGUCUUAACAGUA       |
| 52495_ | 788.1/4 |    |       |      |   | UGACCAAAAACUGAAGUUCUCUAUAGGAUGCUGUAGCACUCAUUGGUGCUAUGUU       |
| x2     | 49-324  |    |       |      |   | UUCUCAGGAGAUUGA                                               |
| ex3_54 | ENST0   | 20 | 2E-06 | 40.1 | 2 | TGGTCAGGTGGAATAATCCTTATCTGTTTCTCCTTTTGAAGGGCAGATTAGAACATGA    |
| 52729_ | 000036  |    |       |      |   | TA                                                            |

|                  |                   |    |       |      |   |                                                                                                                                              |  |
|------------------|-------------------|----|-------|------|---|----------------------------------------------------------------------------------------------------------------------------------------------|--|
| x2               | 4940.1            |    |       |      |   |                                                                                                                                              |  |
| ex3_54<br>53469_ | ENST0<br>000040   | 14 | 0.008 | 28.2 | 2 | TCTGAGACTAGAGTCACATCCTGACACGGCTCTTCTCCAATGTGCTGGAGTCCTCAG<br>CAT                                                                             |  |
| x2               | 8712.1            |    |       |      |   |                                                                                                                                              |  |
| ex3_54<br>53557_ | ENST0<br>000051   | 14 | 0.008 | 28.2 | 2 | TTTAGTTCCATTAACAAAATCTAAAGTTGATTTATAGGCAGGTACAAAAAATCAATCC<br>T                                                                              |  |
| x2               | 6379.1            |    |       |      |   |                                                                                                                                              |  |
| ex3_54<br>54057_ | ENST0<br>000062   | 32 | 3E-13 | 63.9 | 2 | AAAATGATGAGATTCCACTTAATTGGTCCGTGTTTCTGAAACACATGATATTTGTGGA<br>AA                                                                             |  |
| x2               | 9629.1            |    |       |      |   |                                                                                                                                              |  |
| ex3_54<br>54849_ | ENST0<br>000041   | 31 | 1E-12 | 61.9 | 2 | TGGACCAATGATGTGAATGGAATGCATCTGAATAAAAATTATGATCAATCAGTTTTTG<br>GA                                                                             |  |
| x2               | 0253.1            |    |       |      |   |                                                                                                                                              |  |
| ex3_54<br>55817_ | ENST0<br>000045   | 33 | 8E-14 | 65.9 | 2 | AGTTTGCCATGATGAAATGCATGTTAAGTCCGTGTTTCAGCTGATCAGCCTGATTAAA<br>CA                                                                             |  |
| x2               | 9475.1            |    |       |      |   |                                                                                                                                              |  |
| ex3_54<br>56003_ | AJ6094<br>34.1/1- | 22 | 1E-07 | 44.1 | 2 | ACUGCCCCUAGAGGCGUUGCAGCUGUGGCUGCCGUGUCACAUCUGUGUCAUUAG<br>GUGGCAGAGAUUAGAGAGGCUAUGUCUACGCUCAGCGUUCUGCCCCGUGAACGU<br>UUGAAUGUUUGAUAGUCUCACACU |  |
| x2               | 132               |    |       |      |   |                                                                                                                                              |  |
| ex3_54<br>56343_ | CM000<br>677.2/2  | 31 | 1E-12 | 61.9 | 2 | GGATCGATGATGAGTCCTCCAAAAAACATTCTTGGAAAAGCTGAACAAAATGAG<br>TGAAACTCATAACCGTCATTCTCATCGGAACTGAGGTCC                                            |  |
| x2               | 506502            |    |       |      |   |                                                                                                                                              |  |
|                  | 6-                |    |       |      |   |                                                                                                                                              |  |
|                  | 250651            |    |       |      |   |                                                                                                                                              |  |
|                  | 21                |    |       |      |   |                                                                                                                                              |  |
| ex3_54<br>56381_ | CM000<br>667.2/1  | 14 | 0.008 | 28.2 | 2 | AACTTTGCAGTCCATGCACGTGATGATTGGGTGTTTCACACACGTGTGAGGTGTACCC<br>ACCTCGAACCTTGTTATGATCTCAGCACATTACCTACCTGACA                                    |  |
| x2               | 505436            |    |       |      |   |                                                                                                                                              |  |
|                  | 89-               |    |       |      |   |                                                                                                                                              |  |
|                  | 150543            |    |       |      |   |                                                                                                                                              |  |
|                  | 590               |    |       |      |   |                                                                                                                                              |  |
| ex3_54<br>56931_ | CM000<br>677.2/2  | 31 | 1E-12 | 61.9 | 2 | GGATCGATGATGAGTCCCCTATAAAAAACATTCTTGGAAAAGCTGAACAAAATGAGT<br>GAGAACTCATAACGTCAATTCTCATCGGAACTGAGGTCC                                         |  |
| x2               | 505147            |    |       |      |   |                                                                                                                                              |  |
|                  | 7-                |    |       |      |   |                                                                                                                                              |  |
|                  | 250515            |    |       |      |   |                                                                                                                                              |  |
|                  | 71                |    |       |      |   |                                                                                                                                              |  |
| ex3_54<br>57649_ | AC007<br>374.6/1  | 23 | 0.003 | 30.2 | 2 | GGGUGUGCUCAGAGCAGGGGGCCCGAAGAAUGCCUCCUCUGUUUACAACACACC<br>CAAUAGGAAUCUGGGGUCAUUGUGACAAGGGACACAGAGCUUGUGACCUCUUAC<br>AAACAAAUGCCCUACACA       |  |
| x2               | 22865-            |    |       |      |   |                                                                                                                                              |  |

|                        |                                                    |    |       |      |   |                                                                                                                                                                       |  |
|------------------------|----------------------------------------------------|----|-------|------|---|-----------------------------------------------------------------------------------------------------------------------------------------------------------------------|--|
|                        | 122739                                             |    |       |      |   |                                                                                                                                                                       |  |
| ex3_54<br>57719_<br>x2 | AC011<br>749.2/6<br>4633-<br>64502                 | 15 | 0.004 | 30.2 | 2 | CUUCCCAUUUAAUUUGCUGGUAAUAAUGAUACAAUGAUUAGAGCAGUUUACUCUUU<br>GGAAAAAAUAAUUAUUGGGCCAUUGUAAAUUGACAUGAAGUAAGUAAUUUUAUAUCA<br>UCUGCAAUGGACUAGAUGUUG                        |  |
| ex3_54<br>58357_<br>x2 | CM000<br>677.2/4<br>571081<br>5-<br>457108<br>73   | 15 | 0.002 | 30.2 | 2 | AGAGTGCTGGTGGCTGATGAGCCCAGGGCTGCTCTTGCTCACTTTGCTGACAGCAC<br>TCG                                                                                                       |  |
| ex3_54<br>58839_<br>x2 | ENST0<br>000036<br>5321.1                          | 15 | 0.006 | 30.2 | 2 | GTGAGTGATGAATAGTTCTGTGGCATATGAATCATTAAATTTTGATTAAACCCTAAACTC<br>T                                                                                                     |  |
| ex3_54<br>59471_<br>x2 | ENST0<br>000036<br>4642.1                          | 35 | 5E-15 | 69.9 | 2 | CCCTGCATTGAAAGTGATCATGAGCTGCCCGTGCCCTGGTCATTGGTAGTGCAGG<br>GAGA                                                                                                       |  |
| ex3_54<br>60679_<br>x2 | CM000<br>668.2/1<br>137814<br>64-<br>113781<br>311 | 15 | 0.004 | 30.2 | 2 | AAGACTATACTTCCCAGCATCATTGCTATGGTTCATTAAGTAAAGTTTCTCCAATT<br>TGTAGAGCACTAGGAGCCAGAAGGAGGAGGTGCAGTGTCTCTTTAGTGTGAAG<br>CCAGCTTTGCTCTTCGGGAAGGAATGCAGTCTGAGCGAT          |  |
| ex3_54<br>60813_<br>x2 | CM000<br>666.2/1<br>859460<br>83-<br>185946<br>186 | 14 | 0.008 | 28.2 | 2 | ATCCTTTTGGGGTTGATAGGTGTGATGATTGGGTTTCTATGCATGTGTGTGACATGTG<br>TCTCCCTCAAAGCTTGTTACCACATCCGTACAGCACCCATAGGATG                                                          |  |
| ex3_54<br>61131_<br>x2 | CM000<br>681.2/4<br>476497<br>6-<br>447651<br>00   | 14 | 0.009 | 28.2 | 2 | ATGAACACTAGTCAAGCTAATTGTGCTCCTCTCCTCCTATGCAGTGGCGGCAAACAG<br>CAGTGCCCTCAGTAGTATACGCAGCCTGCTGCGTGTAGCGGTGGCCTTAAGAGACC<br>TTGGAGATAGCC                                 |  |
| ex3_54<br>61551_<br>x2 | AP005<br>857.3/1<br>35498-<br>135653               | 15 | 0.003 | 30.2 | 2 | UCUCGUGGUAGUUUUUUUUUGGCACAUUUGUUAAGUUUUCAAUUGGGCCUAACA<br>CUGCCACAUGUAUUUAUACUGGAGUUGGCAAAGGCCUGUGACAAUGAGAUUUCUCU<br>CAAGCCUUUCACGCCUUUCCUCUAUCAGAGAAUUGGCUCCCACAUGU |  |
| ex3_54                 | KZ208                                              | 14 | 0.009 | 28.2 | 2 | CTCCTTTTGTAGTTCAGGAGAATGATTTGGTGTGTTTGTGCCTAAGTGTGATATGTGCCT                                                                                                          |  |

|                    |                                                  |    |       |      |   |                                                                                                                                                                                                                         |
|--------------------|--------------------------------------------------|----|-------|------|---|-------------------------------------------------------------------------------------------------------------------------------------------------------------------------------------------------------------------------|
| 61625_x2           | 908.1/6<br>6317-<br>66216                        |    |       |      |   | CCCTCTGAACCTTGTTACAGCGCTGGCACATTACCCATCCAACC                                                                                                                                                                            |
| ex3_54<br>61911_x2 | CM000<br>664.2/6<br>952017<br>4-<br>695200<br>43 | 20 | 2E-06 | 40.1 | 2 | TTCCAAAGTGTTGAGTTCAGTCCAGGGCAGCTTCCCTGTTCTGTTAATTAACCTTTGG<br>GACATTGAAATGGGCTAGGGGAGATGATTGGGTAGAAAGCATTATTTTATTCATTTGC<br>CTCCCAGCCTACAAAA                                                                            |
| ex3_54<br>62011_x2 | CM000<br>680.2/2<br>181762<br>4-<br>218178<br>28 | 14 | 0.009 | 28.2 | 2 | CCAATGTGTAATATCCTGGGATATCATTTTTTCTAGGCTTTGTCCACATGGCTTAGGG<br>GAGCATAGGGCTCTGCCCCATGATGTACAGTCCCTTTCCTCAGTGTTGGAGATGAAG<br>CTGGGTCTGGTGTTCACATTTTCATTTCTGTAGCTTCTCAGAATCCTGTGGACAGT<br>GACTGGGGAGACAAACCATGCAGGAAATATGT |
| ex3_54<br>62507_x2 | ENST0<br>000039<br>1226.1                        | 14 | 0.008 | 28.2 | 2 | AAGACAACGTAAATATATGTATAAAGAGTATCTTCAGGAGACGTAATAATGTAAAAAT<br>CA                                                                                                                                                        |
| ex3_54<br>62831_x2 | ENST0<br>000040<br>8784.1                        | 15 | 0.003 | 30.2 | 2 | GGCCAGTGATGGTTTTAAAGTAATGGACAGAAGGTTTCTGAAATTCTATTTTGAAGTT                                                                                                                                                              |
| ex3_54<br>63215_x2 | AF067<br>016.1/5<br>46-676                       | 14 | 0.008 | 28.2 | 2 | UUCCAAAGUGUUGAGUUCAGUCCAGGGCAGCUUCCCUGUUCUGUUAUUAAACUU<br>UGGGACAUUAAAUGGGCUAAGGGAGAUGAUUGGGUAGAAAGUUAUUUAUUCUAUUC<br>AUUUGCCUCCCAGCCUACAAA                                                                             |
| ex3_54<br>63811_x2 | ENST0<br>000039<br>1308.2                        | 24 | 1E-08 | 48.1 | 2 | AAGACTATACTTTTCAGGGATTATTTTCAGATAAACTTCTAGAGTTTCTCTGAACCTGTAG<br>A                                                                                                                                                      |
| ex3_54<br>63815_x2 | AL132<br>709.5/1<br>71766-<br>171695             | 21 | 5E-07 | 42.1 | 2 | UGGACCUAUGAUGAUGACUGGUGGCGUAUGAGUCAUUGACGGUGAAUACAGGUC<br>UGGAAGUCUGAGGUCCAA                                                                                                                                            |
| ex3_54<br>63999_x2 | CM000<br>679.2/2<br>801877<br>0-<br>280189<br>07 | 19 | 0.005 | 30.2 | 2 | TGTCTCATTTTTGTAGATCAGGACACTGGGAGGCTCCCTTTTCTCCTTAGCCATGGCT<br>GGAGGCCAAGTCCAGCCCTCAAGGATCATTGTCAGGACCAACACAAGCTGGACAGC<br>CTTGTTTTCTACCTCAGATGGGA                                                                       |
| ex3_54<br>65147_x2 | CM000<br>680.2/5<br>607959                       | 14 | 0.009 | 28.2 | 2 | CCAACATGGATACCCTGGGAAGTCACTCTCCCCAGGCTCTGTCTAAATGGCATAGGG<br>GAGCATAGGGTCCCATCCCAGGATGTACTGTCTTTGCCACAAGTTAGAGATGAAGC<br>TGGGTCTGGTGTCTGTGCCTGAATATTCCTACAGCTTCTGAGTCTGTGGACAATGA                                       |

|                        |                                                  |    |            |      |   |                                                                                                                                                  |
|------------------------|--------------------------------------------------|----|------------|------|---|--------------------------------------------------------------------------------------------------------------------------------------------------|
|                        | 4-<br>560793<br>94                               |    |            |      |   | CAGAGGAGACAGACCATGCAGGAAATTTGT                                                                                                                   |
| ex3_54<br>65933_<br>x2 | ENST0<br>000060<br>7595.1                        | 15 | 0.003      | 30.2 | 2 | TCCAGCAGTCGTTAGCTCTCCTGGCTAGTGTGATGCCTGTGATGGTGTTCCTACTGTT<br>GGA                                                                                |
| ex3_54<br>66671_<br>x2 | ENST0<br>000036<br>3863.1                        | 15 | 0.004      | 30.2 | 2 | TGTCAGTGCTGAAACTTTGTCAAGTTATGCTACTGACATGAAGTAATGATACAGTATA<br>TC                                                                                 |
| ex3_54<br>68731_<br>x2 | AB061<br>842.1/1<br>832-<br>1898                 | 20 | 2E-06      | 40.1 | 2 | UGGCGAUGAGGAGGUACCUAUUGUGUUGAGUAACGGUGAUAAUUUUUAUACGCUAU<br>UCUGAGCCAGCA                                                                         |
| ex3_54<br>68851_<br>x2 | CM000<br>683.2/3<br>445623                       | 16 | 0.001      | 32.2 | 2 | GGGGTGCCTCAGGGCAGGGGGCTTGAAGAACGGCTCCTCTGTTTACGACACACTC<br>AACAGGGGTGTGAGGTCACAGTGATGAGAGGCCCAAACCTTGTGGCCTCCCCGTGAA<br>CAAATGCCCTACACAT         |
| ex3_54<br>69843_<br>x2 | 7-<br>344561<br>10<br>CM000<br>672.2/1<br>214566 | 15 | 0.002      | 30.2 | 2 | ATGCTTTCGTAGTCCGTAGATGTGATGATTGGATCTTCACGCTCGTGTGTGAGATGT<br>GCCTCTCTCCAGCCTTGTTAGGATGTTGGAACATTACCCATCTGACA                                     |
| ex3_54<br>70023_<br>x2 | 3-<br>121457<br>66<br>CM000<br>674.2/9<br>254498 | 14 | 0.008      | 28.2 | 2 | ATTCTCCAAAGCATGATGATTGGGTTTTTCATGCTAATGTGTGAAATGTGCCTCCCTCA<br>AACCTTGTTACGACAAATAAAATTCTCCCCAGGTGATT                                            |
| ex3_54<br>70815_<br>x2 | 7-<br>925448<br>92<br>CM000<br>676.2/3<br>575632 | 15 | 0.002      | 30.2 | 2 | ATGCATCTACTATGTGACAGACCTGGAGCAGTTCCTGTCTGCTGCTAAGGTTTCCAC<br>TACAGATGCAAGAAAACATGTCCTTGTACTTTCTGTCTTTTTTATTGTGGCAGCCAA<br>GGATGAATAGAGGGATACAGGG |
| ex3_54<br>72635_<br>x2 | 7-<br>357564<br>63<br>ENST0<br>000060<br>8459.2  | 17 | 0.000<br>1 | 34.2 | 2 | TTAGAGGTATTTTCAGTACTCTGGCTTAAGAGCCAATGATGTTTTTATTCAAATGTCT<br>G                                                                                  |

|                        |                                                  |    |       |      |   |                                                                                                                                                                                                                                    |
|------------------------|--------------------------------------------------|----|-------|------|---|------------------------------------------------------------------------------------------------------------------------------------------------------------------------------------------------------------------------------------|
| ex3_54<br>76059_<br>x2 | CM000<br>676.2/9<br>171513<br>0-<br>917149<br>15 | 14 | 0.008 | 28.2 | 2 | AAAATTATACTTTTCAGCAATCATCTCTATAGTTTGTACTAGAGAAGCTTCTGTGAATG<br>TGTAGAGCACCGGAAACCACAAGGCAAAGGCTCAGCATTCTCTCCTAAGCGCGAAG<br>CTGGCTCCTGGTGTGGTTGGCCGCAACTGCCATTTGCCATTGATGATCATTCTTCT<br>CTTCTGTGGTAGAGGAAGAGGGAGAGAATGCAGTTTGAGTGGT |
| ex3_54<br>76323_<br>x2 | CM000<br>682.2/4<br>136971<br>4-<br>413696<br>13 | 14 | 0.009 | 28.2 | 2 | AAGACTATACTTTTCAGGGATCATTCTACAGTTCATGACTAGAGAAGTTTCTCTCTGT<br>AGAGCACATTTGGTTGCTGGGATCAGAAACCCATTCAAGCTAGC                                                                                                                         |
| ex3_54<br>77429_<br>x2 | ENST0<br>000051<br>6848.1                        | 15 | 0.002 | 30.2 | 2 | CTACAACCAGCTACTGGTTGATCTTACATTTGATCTGGTGTGCAATGGCTGCAAACA<br>GCA                                                                                                                                                                   |
| ex3_54<br>80513_<br>x2 | CM000<br>663.2/1<br>222127<br>1-<br>122211<br>48 | 14 | 0.009 | 28.2 | 2 | CTAGAAAAATTGAAGATTTGGCCACTCTGGAAACTGCTGAGGGCCCCATGTGTAATG<br>GCTGCAAACAGCTTCCTTTGTTGTGTAGACAGCCTGAGTTTTTCTCTAAGGGACTATG<br>GAGACAGCC                                                                                               |
| ex3_54<br>81947_<br>x2 | CM000<br>678.2/1<br>229732<br>3-<br>122971<br>97 | 18 | 0.008 | 28.2 | 2 | ATTACTTGAAAATCACTCCCAGGCTTTGGCCATGGCAGCAGGTGAGATTCAAGGCC<br>AGAGCCTCCAGGGCCTCAGCTCACCGCACACTGCCCGTGTGTGGTGGGGAAACC<br>CAGACCCCAACAGGT                                                                                              |
| ex3_54<br>83349_<br>x2 | AC020<br>918.6/1<br>65518-<br>165651             | 14 | 0.008 | 28.2 | 2 | GGCCUCCUGGUGCUUACAAGCAGCUGUGUCUUGCAUUGACUGUACAGAAAAAAA<br>GAGAUAGAGUAAACACACCCCGUAUACAACUCAGCCCAGGUCCUGUGCCUUGUCU<br>AUUUUGUGAAUAGGGGGGACAUAG                                                                                      |
| ex3_54<br>84167_<br>x2 | CM000<br>685.2/8<br>814879<br>2-<br>881489<br>18 | 14 | 0.008 | 28.2 | 2 | GTTGGTTGTGAATAACCCTTGGCTTTGATTGTGGCTGTGGATGAAATTCAGCACCTA<br>CAGCCACCAGTAGCCTTAGCTCACCACCCACTGTCTCAATATCATGGGTAAAACCCA<br>GGCTCTGACAGGC                                                                                            |
| ex3_54<br>84451_<br>x2 | ENST0<br>000036<br>4339.1                        | 15 | 0.005 | 30.2 | 2 | CAGCCCTAAAATGGAAAAATTTAAAATTACTTAGACAATGTGATGTCATCAAAGGAA<br>CC                                                                                                                                                                    |

|                        |                                                    |    |       |      |   |                                                                                                                                                           |
|------------------------|----------------------------------------------------|----|-------|------|---|-----------------------------------------------------------------------------------------------------------------------------------------------------------|
| ex3_54<br>85725_<br>x2 | AK024<br>486.1/3<br>319-<br>3428                   | 23 | 4E-08 | 46.1 | 2 | UGCCCAGUGAUGACACCAUCCUUGCUCCCCGUGCCCCCAGGGGCUAUGGGCGA<br>CACCAUGGCUGCCCCUGGGCUGGGCCAGUGGGGCCAAUGCCCAGGGGCUGAGG<br>GCA                                     |
| ex3_54<br>86785_<br>x2 | CM000<br>669.2/1<br>290615<br>31-<br>129061<br>634 | 15 | 0.005 | 30.2 | 2 | ATTCTTTTGTAGCTGATAAGCATGATGACTGGAGTTTCACGTGCATGTGTGAGATATA<br>CCTCCCTCCAACCTTGTTACCACATCTGCACATTACCTGCCTGATG                                              |
| ex3_54<br>86847_<br>x2 | ENST0<br>000036<br>5363.2                          | 14 | 0.009 | 28.2 | 2 | GAGATTATACTTTCAGGGATCAATTCTATAGTTTGTACTAGGGAAGTTTCTCTGAAT<br>GC                                                                                           |
| ex3_54<br>89479_<br>x2 | CM000<br>684.2/1<br>764151<br>9-<br>176414<br>06   | 14 | 0.009 | 28.2 | 2 | ATCCTTTTGC GGTT CATAAAGAACCAAGATGACTGGGTTTCATGCTAATGCATGACAT<br>GTGCCTCCCTCAAATCATGTTGCCTCATGGGCTTATTGGCACATTACCGTCTGAGG                                  |
| ex3_54<br>89571_<br>x2 | AC073<br>149.5/3<br>8723-<br>38590                 | 14 | 0.009 | 28.2 | 2 | UGUUCUGACAUGGGAAGAGUAGCUUCUGGUUGGUGGAGCCCAUCUCACAUUAGC<br>CAGAGACAAAGCAACACCUUGUUUAUCCCGGCUUGGCUUUUGGCCUGUGUCCAUG<br>ACUGGUCCAUAACCUUGGACACAUGG           |
| ex3_54<br>90129_<br>x2 | AC099<br>676.2/7<br>9107-<br>79241                 | 21 | 5E-07 | 42.1 | 2 | CUGCAGCCAAUUAAGCCGACUGAGUUCUUCUCAUGGGGGCCCAGUGUGCAA<br>UGGCUGUAAAUAGCAGCUUCCUUGGUAGUGUAUGCAGCCUGUUUGUUGUAUGGG<br>UUGCUCUAAGGGACCUUGGAGACAGUC              |
| ex3_54<br>90759_<br>x2 | AC090<br>227.10/<br>15587-<br>15444                | 19 | 8E-06 | 38.2 | 2 | CUUUCGGGUCCCCAUUGCAGCCCCCGGAUGAGCCCGCAGUAUUUCCUUAUAUG<br>AUCAGGUCCCAUUGC GGGCGGCGCCGCUUGCCCGGAGCCUGAGAGGUAUAUGAA<br>AACGUGGC GAGCGAAUUGGGGCCAGGGGACCUGGAG |
| ex3_54<br>91107_<br>x2 | ENST0<br>000038<br>4436.1                          | 21 | 5E-07 | 42.1 | 2 | CCGCAGCCAATTAAGCCGACTGAGTTCCTTTCTCATGGGGACCCAGTGTGCGATG<br>GCTG                                                                                           |
| ex3_54<br>91125_<br>x2 | ENST0<br>000051<br>6131.1                          | 27 | 2E-10 | 54   | 2 | GCCAGGTACCATGCAAAAGCAATCTTCCCTTTAGAATGACTGATGGTATGCTAAGGT<br>TTT                                                                                          |
| ex3_54<br>91285_<br>x2 | ENST0<br>000040<br>8746.2                          | 14 | 0.009 | 28.2 | 2 | AAGACTTTATCCCCCACCCCGCAAAGAAAAGGAAGAAGAAGAGTTTTTAAATGGCG<br>CAG                                                                                           |

|                        |                                                    |    |            |      |   |                                                                                                                                          |
|------------------------|----------------------------------------------------|----|------------|------|---|------------------------------------------------------------------------------------------------------------------------------------------|
| ex3_54<br>91757_<br>x2 | AL132<br>709.5/1<br>28363-<br>128289               | 15 | 0.004      | 30.2 | 2 | UGAGCAAGCGAUGACAGCCGGUGUGUGAGUCAUGGAGGAUGAAUACUAAGU<br>GCCUGGAACUCUGAGGUUCAA                                                             |
| ex3_54<br>92699_<br>x2 | CM000<br>680.2/2<br>290162<br>6-<br>229015<br>24   | 15 | 0.007      | 30.2 | 2 | GTTCTTTTGTGTTTCATAAAGTAATGATTGTGTTTTCACATTATTGTGTGAGGTGTGCC<br>TCCCTCAGACCTTGATACCAGTCTGCACATTACCTGATGTGAAG                              |
| ex3_54<br>94789_<br>x2 | CM000<br>686.2/5<br>714796<br>5-<br>571478<br>90   | 28 | 6E-11      | 56   | 2 | AAGACTATACTTTCAGGGATTATTTCTATAGTTTGTTAATTATTTGTACTAATAGTAGTA<br>ATTGACACTAACTAGT                                                         |
| ex3_54<br>95535_<br>x2 | ENST0<br>000036<br>4699.1                          | 43 | 1E-19      | 85.7 | 2 | TGGACCAATGATGACAAATGGTGGCATTGGAGTTATGGACGATGAATGATATGTGTC<br>TGA                                                                         |
| ex3_54<br>96043_<br>x2 | AC104<br>763.12/<br>68286-<br>68156                | 15 | 0.003      | 30.2 | 2 | UGCCUCUCUCCCAUGGGCUUUGGGGGGUCCUGUUCUCCUAGCCAAGGCUGGA<br>GGCCAAGAGCAGCCCUCGAGGAUCGUCGUCAGGACUGCCACGAGUGGGGCAGCC<br>UUGUUUUCUGCCUCAGACAUGU |
| ex3_54<br>96437_<br>x2 | CM000<br>669.2/2<br>426171<br>4-<br>242616<br>09   | 15 | 0.003      | 30.2 | 2 | ATCCTTTTGTAGTTTGTAAGTGTGATGATTGGGTTTTTTCACGCTCATGTGTGAGATAT<br>GCCTTCCTTAAAGTTTGTTACATCATCAGCACATTACCCATCTGACA                           |
| ex3_54<br>97001_<br>x2 | AC090<br>821.13/<br>147314<br>-                    | 16 | 0.000<br>9 | 32.2 | 2 | UGCACUUAUGUAUGUUUUUGUUUAAACUGUGGACAAAGACUUAUGGAUAAGUACA<br>AAAAUAAAUCCUCUUUUGCAACCCAGAACUCAUUGUUCAGUAUGAGUUUUAUAC<br>AUUAAGCCAGGGAAAUU   |
| ex3_54<br>98959_<br>x2 | CM000<br>669.2/1<br>111093<br>57-<br>111109<br>268 | 14 | 0.009      | 28.2 | 2 | ATGCTTTTGTAGTTCGTAAGCATGATGATTGGGTTTTTCTTGCTCTTGTATGAGATGTG<br>CCTCCGTCATACCTTGAAACCTGACTTGA                                             |

|                        |                                                    |    |            |      |   |                                                                                                                                                                                     |
|------------------------|----------------------------------------------------|----|------------|------|---|-------------------------------------------------------------------------------------------------------------------------------------------------------------------------------------|
| ex3_54<br>99153_<br>x2 | ENST0<br>000040<br>8528.2                          | 14 | 0.009      | 28.2 | 2 | AAGACTCCTTTCAGGAATCATTCTTTAGTTCTACTAGAGAGGCTTCTCTTAACATGT<br>G                                                                                                                      |
| ex3_55<br>00887_<br>x2 | ENST0<br>000040<br>8612.1                          | 15 | 0.003      | 30.2 | 2 | ACTGGTCCAGGATGAAACCTAATTTGAGTGGACATCCATGGATGAGAAATGCGGATA<br>TGG                                                                                                                    |
| ex3_55<br>01069_<br>x2 | ENST0<br>000036<br>2493.1                          | 32 | 3E-13      | 63.9 | 2 | AGGCAGGATCTAGTTACATTGTAGCTGTGAAGTGCTGCATTGTCTTTGCCCCCTGCT<br>CAA                                                                                                                    |
| ex3_55<br>01869_<br>x2 | AB017<br>549.1/4<br>52-542                         | 18 | 5E-05      | 36.2 | 2 | UGCUGGUGGUGAAGCUCUCCUCUCUCCGAGCACUGGGCCCUGCCUGGGGGCUCUCC<br>GGGAGCCAGGGGAGAUGCACCUCCGGAAGCUGAAGCG                                                                                   |
| ex3_55<br>02825_<br>x2 | CM000<br>672.2/2<br>148563<br>8-<br>214857<br>22   | 15 | 0.004      | 30.2 | 2 | AAGACTGTATTTTCAGAGCTCATTCTGTAGTTCATTACTATGGAAGTTTCTGTAAATA<br>TATAGAGGTCTACAAAACAAAAAAGT                                                                                            |
| ex3_55<br>02989_<br>x2 | CM000<br>674.2/6<br>476097<br>3-<br>647608<br>68   | 20 | 0.000<br>8 | 32.2 | 2 | ATCCTTTTGTGGTTCATAAGCCTGATGATTGGGTTTTTCATGCTATTGTGTGAGTTACC<br>ACCCCTACCTCAAACCTTGTTAGGACTCCGCGCATTACCCCTCTGTGT                                                                     |
| ex3_55<br>03441_<br>x2 | CM000<br>663.2/1<br>539981<br>51-<br>153998<br>067 | 15 | 0.002      | 30.2 | 2 | TTGACTATACTTTTCAGGGATCATTCTATAGTTCATTACTAGAGAAGTTTCTCAGAATG<br>TATAGAGAAAAAAAAGAATCCACAGA                                                                                           |
| ex3_55<br>04457_<br>x2 | AC104<br>794.4/7<br>2269-<br>72155                 | 14 | 0.008      | 28.2 | 2 | GUGCCUAAGGUUAACACAGCGCCUUAAGAGGCUAACACAGAAGGGCAAAGUAAGU<br>CUCCAUAAAACCCAGAGAAGACUGUGAACCCUUCUCUGGAUCCUGUCUGGAGUCA<br>CAGCU                                                         |
| ex3_55<br>05425_<br>x2 | ENST0<br>000039<br>1322.1                          | 15 | 0.003      | 30.2 | 2 | GTGCCCTTTTAAGGTTGACGCAGTGCTTTAAGGGGCTAACACAGAAGGGTAAAGGAA<br>GTC                                                                                                                    |
| ex3_55<br>05807_<br>x2 | CM000<br>668.2/9<br>211942                         | 15 | 0.003      | 30.2 | 2 | AAGGCTATACTTTTCAGGAATCATTCTATAGTTTGTACAAGAGAAGTTTCTCTGAATG<br>TGTAGAGCACCAGAAACCACGACGAGGACGAGAAGGCACAGCATTCTTTCTAAATG<br>TGAAGCCAGCTCTTGGTGTGCTTCAACTGCCACTTGCCATTAATGACAGTTCTTCTT |

|                        |                                                  |    |       |      |   |                                                                                                                                                                                                                                  |
|------------------------|--------------------------------------------------|----|-------|------|---|----------------------------------------------------------------------------------------------------------------------------------------------------------------------------------------------------------------------------------|
|                        | 3-<br>921196<br>33                               |    |       |      |   | TCCCCTGGGAGAATAAAAAGGAGAGAATGCAGTCCT                                                                                                                                                                                             |
| ex3_55<br>06225_<br>x2 | CM000<br>663.2/9<br>065775<br>0-<br>906579<br>64 | 15 | 0.003 | 30.2 | 2 | AAGACTATATTTTCAGGGATCATTCTACAGTGCCTACTAGAGAAGTTTCTGTGAAC<br>TTGTAGAGCACCGGAAACCATGAGCAGGAAGTGCAGCGTTCTCTCTGAGCATGAA<br>GCCGGCTCTTGGTGTGGCTTCGCTGCAACTGCCATTGGCCATTGATGATCGTTCTTC<br>TCTTCTCTGGGAGAGTAAGAGAGAGAGGACACAGTCTGAGTGGT |
| ex3_55<br>06903_<br>x2 | ENST0<br>000040<br>8318.1                        | 14 | 0.008 | 28.2 | 2 | GGGGTGTGCTCAGAGCAGGGGGCTGAAGAATGGCTCCTCTGTTTATAACACATGGA<br>ACAG                                                                                                                                                                 |
| ex3_55<br>07449_<br>x2 | ENST0<br>000038<br>3910.1                        | 20 | 2E-06 | 40.1 | 2 | CTGCAGCCAATTAAGCCGACTGAGTTCCTTTCTCATGGGGGCCAGTGTGCAATG<br>GCTG                                                                                                                                                                   |
| ex3_55<br>08683_<br>x2 | ENST0<br>000045<br>9538.1                        | 26 | 8E-10 | 52   | 2 | ACCCCTGGCAGCCCCTCCTGATGATTCTTCTTCTGAGCACGCTCATGATGAGCAAA<br>CTG                                                                                                                                                                  |
| ex3_55<br>08837_<br>x2 | ENST0<br>000058<br>1572.1                        | 30 | 1E-09 | 52   | 2 | TACTCCAGCCTGGATGACAGAGCCAGACTCTGTCTCGAAAAAAAAAAAAAAAAAAG<br>CTT                                                                                                                                                                  |
| ex3_55<br>08845_<br>x2 | CM000<br>671.2/9<br>229259<br>3-<br>922924<br>61 | 30 | 4E-12 | 60   | 2 | GCCCTGTGGTTGCTGGATGCTGTTGTGCATGGACAGCTCTCCAGTGGATTTCGATGG<br>GCCATAGCAATCCTGTGATTTATGCATGGAGGCTGCTTCTCCTCAGCAGCTGCCATA<br>GCCCGGTCGCTGGTACATGA                                                                                   |
| ex3_55<br>09565_<br>x2 | ENST0<br>000041<br>0734.2                        | 15 | 0.002 | 30.2 | 2 | AGGACTGTGCTTTCAGAGTTCATGTCCACAGCTCATTGCGGGGGCAGTTTCTCTGAT<br>CGT                                                                                                                                                                 |
| ex3_55<br>09777_<br>x2 | ENST0<br>000040<br>8471.1                        | 16 | 0.001 | 32.2 | 2 | GGGGTGCCTCAGGGCAGGGGGCTTGAAGAACGGCTCCTCTGTTTACGACACACTC<br>AACA                                                                                                                                                                  |
| ex3_55<br>12381_<br>x2 | ENST0<br>000036<br>2913.1                        | 16 | 0.001 | 32.2 | 2 | CCGCAGTGACAGCAATATTTTTCATCCACAGTTCACCTCATGAATGTTGTCACTTTGG<br>GT                                                                                                                                                                 |
| ex3_55<br>12585_<br>x2 | ENST0<br>000038<br>4084.1                        | 43 | 1E-19 | 85.7 | 2 | GGTCTCTCAGCTCCGCTTAACCACACGGGTCCAGTGTGTGCTTGGCGTGTTCAGG<br>GAG                                                                                                                                                                   |
| ex3_55                 | ENST0                                            | 14 | 0.008 | 28.2 | 2 | ATTCATGTTTTAAAGGCATAATGATGTCACTGACTGGCTGATGAAATCCCAAGCGTA                                                                                                                                                                        |

|        |         |    |       |      |   |                                                             |
|--------|---------|----|-------|------|---|-------------------------------------------------------------|
| 12805_ | 000036  |    |       |      |   | GG                                                          |
| x2     | 5504.1  |    |       |      |   |                                                             |
| ex3_55 | CM000   | 15 | 0.005 | 30.2 | 2 | ATCCTTTTCATAGTTCATATGCGTGCTGATTGGGGTTTCATGCTCTGGTGTGAGATGT  |
| 13721_ | 666.2/7 |    |       |      |   | GCTTCCCTCAAGCCTTGTTAAGACATGAGCACATTACCATCTGATA              |
| x2     | 864010  |    |       |      |   |                                                             |
|        | 0-      |    |       |      |   |                                                             |
|        | 786402  |    |       |      |   |                                                             |
|        | 02      |    |       |      |   |                                                             |
| ex3_55 | CM000   | 34 | 2E-14 | 67.9 | 2 | ATGCAGGTACTGTTACAATACTGATGTGTTTTGTTGTCGTTCCCCCTGCTTAAAG     |
| 15853_ | 665.2/1 |    |       |      |   | CACTTGATGCATAACTCTGTCTACCTTCATTCCGTAGTAAGACAGAGACGCTTGGCTT  |
| x2     | 867863  |    |       |      |   | CAGACAT                                                     |
|        | 23-     |    |       |      |   |                                                             |
|        | 186786  |    |       |      |   |                                                             |
|        | 445     |    |       |      |   |                                                             |
| ex3_55 | CM000   | 14 | 0.009 | 28.2 | 2 | ATTCTTTTATGGCTTTTATGGTGCATAAGCATGATGATAGGGTTTTTATGCTCATGTGT |
| 16383_ | 680.2/3 |    |       |      |   | GAGACACACGTCTCTCAAACCTTATTACGACAACAGTACATTACCTGTATGACT      |
| x2     | 107249  |    |       |      |   |                                                             |
|        | 5-      |    |       |      |   |                                                             |
|        | 310726  |    |       |      |   |                                                             |
|        | 07      |    |       |      |   |                                                             |
| ex3_55 | ENST0   | 15 | 0.003 | 30.2 | 2 | AGACTCCCAGCTCTGCCAGTTACACTAGGCTTCGCCTGTGTGGCTTCTGTAATGGG    |
| 16687_ | 000036  |    |       |      |   | GAG                                                         |
| x2     | 5647.1  |    |       |      |   |                                                             |
| ex3_55 | ENST0   | 22 | 4E-05 | 36.2 | 2 | ATGCATCTATTTGACAGACCTGGAGCAGTTGCTATCTGCTGCTATGGTTTCCACCACA  |
| 18681_ | 000051  |    |       |      |   | GA                                                          |
| x2     | 7242.1  |    |       |      |   |                                                             |
| ex3_55 | CM000   | 14 | 0.008 | 28.2 | 2 | ATCCTTTTGTAGTTCATAAGTGTGATTGGGTATTCAAATGAAGGTGTGAGAGGTGCCA  |
| 18779_ | 676.2/1 |    |       |      |   | CTCTGAAACCTTGTTATGACGTCGGCACATTACCCATATGACA                 |
| x2     | 027895  |    |       |      |   |                                                             |
|        | 91-     |    |       |      |   |                                                             |
|        | 102789  |    |       |      |   |                                                             |
|        | 491     |    |       |      |   |                                                             |
| ex3_55 | ENST0   | 44 | 3E-20 | 87.7 | 2 | TCCTCCTACAAAGGCGTGTCTGTGGTTCCTGTCTTTGGACATGTAAGAATTGGAGG    |
| 18981_ | 000057  |    |       |      |   | AAA                                                         |
| x2     | 8065.1  |    |       |      |   |                                                             |
| ex3_55 | ENST0   | 25 | 4E-09 | 50.1 | 2 | GGGGTGTGCTCAGAGCAGGGGGCCTGAAGAATGGCTCCTCTGTTTACAACACACCC    |
| 19615_ | 000040  |    |       |      |   | AACA                                                        |
| x2     | 8548.1  |    |       |      |   |                                                             |
| ex3_55 | AC092   | 20 | 2E-06 | 40.1 | 2 | UUGCACAGUGAACACCCAAGUGUGCUUUUAUAGUUCUUUGGCUUUGACCCUGUGC     |
| 19987_ | 579.3/1 |    |       |      |   | UAGAGCAUUCAUUACCUUGUUCUUCUGCUCUGCAUUGAAAGGAAUUAUUUGUCCUUU   |

|                  |                              |    |            |      |   |                                                                                                                                                                                                |
|------------------|------------------------------|----|------------|------|---|------------------------------------------------------------------------------------------------------------------------------------------------------------------------------------------------|
| x2               | 14744-114881                 |    |            |      |   | UAAAUGUAUUCAGAAAGCCAGCACAUUA                                                                                                                                                                   |
| ex3_55<br>24439_ | ENST0<br>000045              | 15 | 0.002      | 30.2 | 2 | AAGACTATCCTCTCAGTGATGATTTCTATAGTTCGTTACTAGAGAAGTTTCTCTAAACA<br>T                                                                                                                               |
| x2               | 8938.2                       |    |            |      |   |                                                                                                                                                                                                |
| ex3_55<br>24883_ | ENST0<br>000036              | 16 | 0.000<br>7 | 32.2 | 2 | AAGACTATACTTTCAGGGATCATTCTGTAGTTCATTATTAGAGAGGTCTCTCTGAAT<br>GA                                                                                                                                |
| x2               | 4476.2                       |    |            |      |   |                                                                                                                                                                                                |
| ex3_55<br>25687_ | CM000<br>669.2/9             | 15 | 0.002      | 30.2 | 2 | ATCCTTTTGTAAATTCATGAGTGTGCTTGGGTGTTACATCCATGTGTGAGACATGCCA<br>CTCTCAAACCTTGTCAACAACGTTGGCACATTACCCATGTGACA                                                                                     |
| x2               | 941407<br>8-<br>994139<br>78 |    |            |      |   |                                                                                                                                                                                                |
| ex3_55<br>25717_ | CM000<br>683.2/3             | 14 | 0.008      | 28.2 | 2 | ACTTTATTGTATATAAGCACTGTGCTAAAATTGCAGGAACTGGGACCATATCCTGATT<br>TTTGTAAATAATGCCAGCAGAGTACACACAAGAAAAGTAACTGCACTAGATTGTGAAGA<br>CTGGGGTGGACCTGCTTCTGAAGGTCCAGTGCCCTTTGTCTTAAGATTTGGTGTAGT<br>GTGT |
| x2               | 166430<br>6-<br>316644<br>82 |    |            |      |   |                                                                                                                                                                                                |
| ex3_55<br>26691_ | CM000<br>664.2/6             | 15 | 0.002      | 30.2 | 2 | ATCCTTTTGTAGCTTGTAAAGCGTGATGATTGGATGTTTGCAGGAGCGTGTGTGATGT<br>GCCACCTCGCACCTTGCTACAACATCGGCACAGTAGCTGTGTGACA                                                                                   |
| x2               | 995564<br>5-<br>699557<br>47 |    |            |      |   |                                                                                                                                                                                                |
| ex3_55<br>26737_ | CM000<br>663.2/3             | 33 | 8E-14      | 65.9 | 2 | TCTGGCAATGATGACCCACTTGCCCTCACTGAGAACAAAGTTTCGGTAATGAGAATCT<br>TTGTTAATGGACTCAAGTTCTGAGCCAGA                                                                                                    |
| x2               | 093577<br>3-<br>309356<br>88 |    |            |      |   |                                                                                                                                                                                                |
| ex3_55<br>27279_ | CM000<br>663.2/1             | 14 | 0.009      | 28.2 | 2 | AGGACTTGCCTCATTAGTAATACAACCAAGCTGATAGGGTAGTTTGGCAGGACACAC<br>AGCCATTTCCCTCTCAGCTTAGGAAGGCTGTCATAAGACTAGGACTAGCTCTGCAAG<br>GCAAGAGAAGGACAAT                                                     |
| x2               | 369619<br>9-<br>136960<br>70 |    |            |      |   |                                                                                                                                                                                                |
| ex3_55<br>27355_ | CM000<br>678.2/6             | 18 | 8E-05      | 36.2 | 2 | TAGTGTGGAAGTGTCTACTCCTCATTCTGTGGAAGCAGGAATACATTATAACATGC<br>TCCATTAATAAAGGAGTTCTAGGCCAGGCAGCGTGCCTCATGCCTGG                                                                                    |

|                        |                                                            |    |       |      |   |                                                                                                                                                                                                                                   |
|------------------------|------------------------------------------------------------|----|-------|------|---|-----------------------------------------------------------------------------------------------------------------------------------------------------------------------------------------------------------------------------------|
| x2                     | 863096<br>8-<br>686308<br>64                               |    |       |      |   |                                                                                                                                                                                                                                   |
| ex3_55<br>29171_<br>x2 | AC095<br>353.9/7<br>5194-<br>75323                         | 22 | 4E-05 | 36.2 | 2 | CUUCCCAUUUUAUUUGCUGGUUAUAGUCUCACAAUGAUUAUGGCCAGUUUAUACUUAUG<br>GGAAAAAUAUAUUUGGCCAUUCGUUAUUUGACAUGAGUAACUAAUUUUCACCUCU<br>UCUGCAUGGACUAUCUAUUAU                                                                                   |
| ex3_55<br>31133_<br>x2 | AC006<br>534.10/<br>104122<br>-                            | 35 | 5E-15 | 69.9 | 2 | CCCUCUACAAAGGCAUGUCUAUAGUUCUUGUCUUUGGACAUGUAAGAAUUGGA<br>GGCAAAGAAAUGUGGACUUGGAGAAAUCUGGGGCCAGCUUGCUCUCCGCAGGCU<br>CAAGAUCAACCAUCCCAUAG                                                                                           |
| ex3_55<br>34331_<br>x2 | 104252<br>CM000<br>672.2/2<br>840825<br>1-<br>284080<br>39 | 14 | 0.009 | 28.2 | 2 | AGGACTGTGCTTTCAGAGTTCATGTCCACAGCTCATTGCGGGGGCAGTTTCTCTGAT<br>CGTGTGGAGCTGGATGCCAGGAGCAGGACACACTGTGTTCTTTCCTGAGCATGAAG<br>CCAGCTCTCGGAGTTGTTTTGTTGCACCTGCCATTAGGCGTTGATGATGTTCTTTCTT<br>TCCTCCGGTAGGGTAAGAAGGAGAGGACGCAGTCCAAGTGGT |
| ex3_55<br>34549_<br>x2 | ENST0<br>000038<br>4529.1                                  | 42 | 5E-19 | 83.8 | 2 | GGATCGATGATGACTTCCATATATACATTCCCTTGGAAGCTGAACAAAATGAGTGAAA<br>AC                                                                                                                                                                  |
| ex3_55<br>34591_<br>x2 | CM000<br>663.2/2<br>263161<br>64-<br>226316<br>061         | 14 | 0.008 | 28.2 | 2 | ATCCTTTTGTAGCTCCTGAGCACGATGATTGTGTGTTTCATGCTCATGTGTGAGATGTC<br>CCACCCTTGAACCTTGTTACAACATCGGCATATTACCTGTCTGACA                                                                                                                     |
| ex3_55<br>37033_<br>x2 | ENST0<br>000051<br>6069.1                                  | 14 | 0.008 | 28.2 | 2 | TTATATTAGTGATGGCTTTTAAAGTTCTCACAGACAGGCATCTCTCTGAAAGACAGCG<br>AA                                                                                                                                                                  |
| ex3_55<br>38623_<br>x2 | CM000<br>677.2/2<br>508128<br>7-<br>250813<br>78           | 37 | 4E-16 | 73.8 | 2 | GGATCGATGATGACTTCCATATATACATTCCCTTGGAAGCTGAACAAAATGAGTGAAA<br>ACTCTATACCGTCATCCTCGTCAAACCTGAGGTCC                                                                                                                                 |
| ex3_55<br>39431_<br>x2 | AC004<br>830.1/5<br>8886-                                  | 15 | 0.003 | 30.2 | 2 | CUAUCAAAAGUUACUUUUUUGUGGGGUGGAAGUUUUUAAAAUAACCUUUACCUACG<br>UGGGCUGUUUUUGAAAAUAAAGAAAAGACCACACUCAGCAGAGGGGCUAUACCCCU<br>UAGUAUAGUUCACCACUAUUUUUGCAGCUUAUUAU                                                                       |

|                 |                                      |    |       |      |   |                                                                                                                                                                                                                                                                                                                                                                                                                        |  |
|-----------------|--------------------------------------|----|-------|------|---|------------------------------------------------------------------------------------------------------------------------------------------------------------------------------------------------------------------------------------------------------------------------------------------------------------------------------------------------------------------------------------------------------------------------|--|
|                 | 58743                                |    |       |      |   |                                                                                                                                                                                                                                                                                                                                                                                                                        |  |
| ex3_55_39591_x2 | KV880<br>768.1/1<br>215368           | 16 | 0.001 | 32.2 | 2 | ATCCTTTTGTAAAGATAAGCATAATGATTGGGTTTTTATGTTACATGTTTGATATGC<br>CTCCCTCAAATCCTCTTATGATGTCGGCACATGACCCATCTGAGG                                                                                                                                                                                                                                                                                                             |  |
|                 | -<br>121547<br>1                     |    |       |      |   |                                                                                                                                                                                                                                                                                                                                                                                                                        |  |
| ex3_55_39893_x2 | CM000<br>677.2/6<br>945814           | 14 | 0.008 | 28.2 | 2 | AAGAGTATAATTTTCAGGCATCAATTCTGTAGTTCCTTACTAGAGAAGTTTCTCTTAACA<br>TGTACAACACTGGAAACCATGAGGAGGTGGCAGCACAGCATTCTCTGCTGAGCGTG<br>AGGTTGGCTCTTGGTGTGCTTTGCTGCAACTGTCATTTGCCATTGATGATGGTTCTT<br>CTCTTCTCCGAGGGAGAGAATGCAGTCTGAGTGGG                                                                                                                                                                                           |  |
|                 | 9-<br>694579<br>41                   |    |       |      |   |                                                                                                                                                                                                                                                                                                                                                                                                                        |  |
| ex3_55_39921_x2 | AC055<br>866.19/<br>124993           | 16 | 0.001 | 32.2 | 2 | UGCACUUAUGUAUGUUUUUGUUUAACUUGUGGACAAAGACUUAUGGAUAGGUGCA<br>ACAAAUAUCCUCUUUUGCAACCCAGAUCUAUUGUUCAGCAUGAGUUUUGAUAC<br>AUACAGGAAGGGAUUU                                                                                                                                                                                                                                                                                   |  |
|                 | -<br>124866                          |    |       |      |   |                                                                                                                                                                                                                                                                                                                                                                                                                        |  |
| ex3_55_40979_x2 | AJ6094<br>56.1/1-<br>134             | 22 | 2E-07 | 44.1 | 2 | UGCAUUCUUAACCCUCUUGGUGGCUUCCUGUAAAUGCUUCCAAGAUUAGAGCG<br>AAUGCUAUAGAAUUGCAGGAAAGUCCAAGGGCUGCGCUGUCUCCUGUGGCUCAG<br>UCUUUUUCAUACCUGCAACAUCU                                                                                                                                                                                                                                                                             |  |
| ex3_55_41093_x2 | AL161<br>747.5/8<br>490-<br>8387     | 40 | 7E-18 | 79.8 | 2 | CCCCUGUGAUGAGUUUGCAUAAUACGGAGACACCAGGUAGGGAGUUUUACCC<br>UAACUUGGGUGUUGUUUGAAUAAACUCUUUCUGUAAAUGCUGAGGGGC                                                                                                                                                                                                                                                                                                               |  |
| ex3_55_41363_x2 | KN538<br>363.1/2<br>21065-<br>221340 | 31 | 1E-12 | 61.9 | 2 | GGTCGATGATGATTGGTAAAAGGTCTGATTGCACTGAATGTCACGGTCCCTTTGTTG<br>CCCTCAACTCCCAGCAGCCCATTTTTTCCCTCCCGTACATTTAAGTCATGTGTATGG<br>GATCATGGAGCAGCTGATAATTTGGGATTCTGTCAGTGTGTGTTTCTGAGAGTGATC<br>GGCTCACAGCTGACGAGTATCCAACAAAACAGTTACACAGGAGACTGACGAGTGG<br>CAGTCATGGGTGTGATGGTGCATGATCTCAAGTTTTCAATCTGAGACC<br>AGGTCTTGTGGACAAAGACTTACGGACAGGTGCAAAACATAAATCCTCTTCTGCAAC<br>CCAGAACTTATTGTTTCAGTATGAGTTTTGATACATGTAAGAAGGGATATT |  |
|                 | 4-<br>239721<br>88                   |    |       |      |   |                                                                                                                                                                                                                                                                                                                                                                                                                        |  |
| ex3_55_44117_x2 | AL132<br>709.5/1<br>38673-<br>138602 | 33 | 8E-14 | 65.9 | 2 | UGGAUCGAUGAUGACUACCGGUGGCGUAUGAGUCAUAUGUGAUGAAUACGUGUU<br>UGGAACUCUGAGGUCCA                                                                                                                                                                                                                                                                                                                                            |  |

|                 |                                |    |       |      |   |                                                                                                           |
|-----------------|--------------------------------|----|-------|------|---|-----------------------------------------------------------------------------------------------------------|
| ex3_55_44655_x2 | ENST0000517283.1               | 19 | 0.004 | 30.2 | 2 | ACCTTCTTGTTTAAGCTCTGTACTAAAATTGCAGAACTAGTATCGTGTCTTACCATTG                                                |
| ex3_55_44725_x2 | CM000663.2/26246754-26246847   | 15 | 0.005 | 30.2 | 2 | AAGACTGTATTTTCAGGGATCGTTTCTGTAGTATGTTACTAGAGAAGTTTTCTGAATGTGTAGAGCACCGTTAAGAAAAAGAAAATAAAATGA             |
| ex3_55_45405_x2 | CM000664.2/232678963-232679065 | 14 | 0.008 | 28.2 | 2 | ATCCTTTTGCGGTTTCATAATGTGATGACTAGGTTTTTCATGTCCATGTGTGAAGTGCGCCTTCCTCCAATCCTGTTAAGATGTCAGCACATTTGCCTTCTGACA |
| ex3_55_46693_x2 | ENST0000363762.1               | 32 | 3E-13 | 63.9 | 2 | TGGATCAATGATGAGTATGCGTGGGGCATCTGAATCAAATATTCTGATTATACCCTGCT                                               |
| ex3_55_50007_x2 | ENST0000516650.1               | 15 | 0.004 | 30.2 | 2 | CACTCCCCTTTCATTTTACCATTGAGGCTTATGTCTTTATTGGTTGTTCAAGTAGGGCAA                                              |
| ex3_55_50331_x2 | CM000667.2/140527428-140527352 | 15 | 0.005 | 30.2 | 2 | GGTCAATGATGAGCTGACATGTATTCTGAATCTAAAGTTGATTATTAGTACTTTAGTTCTAGAATTACTGAGACATG                             |
| ex3_55_51443_x2 | CM000667.2/175450816           | 14 | 0.009 | 28.2 | 2 | ATCCTTTTGTGGTTCATAAGCATGATGATTGGGTTTTTCATGCTTATGTGTGTGATGTGCTGCCTTAAACCTTGTTACAGTGTCAGCACGTCACTCATCTGATG  |
| ex3_55_51753_x2 | ENST0000364969.1               | 22 | 1E-07 | 44.1 | 2 | TGGACCAATGATGACCACTGGTGGCGTTTGAGTCATGGACGATGAATACTACGTGCTGA                                               |
| ex3_55_52021_x2 | CM000666.2/57106345-           | 15 | 0.004 | 30.2 | 2 | ATCCTTTTGTAGTTCATAAGCATGATGATTGAGTGTTTCATACACATGTGTGAGGTATGTCGCCCCCAAACCTTTTATGACATTGGCACATTACCTGTCTGACA  |

|        |         |    |       |      |   |                                                            |                                                           |
|--------|---------|----|-------|------|---|------------------------------------------------------------|-----------------------------------------------------------|
|        | 571062  |    |       |      |   |                                                            |                                                           |
|        | 43      |    |       |      |   |                                                            |                                                           |
| ex3_55 | AJ3118  | 40 | 7E-18 | 79.8 | 2 | GAUCACGGUGAUGGCUGACCAGGGCUCUCCUGACCUAUACAGGCCUCUGCUAUGG    | GGGUGAUGGCCAGUCCUGGUGUCUGAGUGAUU                          |
| 52237_ | 53.1/1- |    |       |      |   |                                                            |                                                           |
| x2     | 86      |    |       |      |   |                                                            |                                                           |
| ex3_55 | ENST0   | 33 | 8E-14 | 65.9 | 2 | GGATCGATGATGACTTCCATATGTACATTCTTGAAAGCTGAACAAAATGAGTGAAA   | AC                                                        |
| 52317_ | 000038  |    |       |      |   |                                                            |                                                           |
| x2     | 4430.1  |    |       |      |   |                                                            |                                                           |
| ex3_55 | CM000   | 33 | 8E-14 | 65.9 | 2 | GGATCGATGATGACTTCCATATATACATTCTTGAAAGCTGAACAAAATGAGTGAAA   | ACTCTATACCGTCATTCTCGTCGAACTGAGGTCC                        |
| 52569_ | 677.2/2 |    |       |      |   |                                                            |                                                           |
| x2     | 508014  |    |       |      |   |                                                            |                                                           |
|        | 2-      |    |       |      |   |                                                            |                                                           |
|        | 250802  |    |       |      |   |                                                            |                                                           |
|        | 33      |    |       |      |   |                                                            |                                                           |
| ex3_55 | CM000   | 33 | 8E-14 | 65.9 | 2 | ATCCTTTTGTAAATACATAAGCATAATGATTGGTTTTTATGTTACATGTTTGATATGC | CTCCCTCAAATCCTCTTATGATGTCGGCACATGACCCATCTGAAG             |
| 54591_ | 678.2/2 |    |       |      |   |                                                            |                                                           |
| x2     | 953936  |    |       |      |   |                                                            |                                                           |
|        | 5-      |    |       |      |   |                                                            |                                                           |
|        | 295392  |    |       |      |   |                                                            |                                                           |
|        | 62      |    |       |      |   |                                                            |                                                           |
| ex3_55 | ENST0   | 40 | 7E-18 | 79.8 | 2 | GCACCTGAATCTTTCCATTCTTGCTGCCTCGTGCCGGTGTGGGGACAGATGGTG     | CTAC                                                      |
| 54605_ | 000036  |    |       |      |   |                                                            |                                                           |
| x2     | 4587.1  |    |       |      |   |                                                            |                                                           |
| ex3_55 | AL132   | 33 | 8E-14 | 65.9 | 2 | UGGAUCAAUGAUGACCACUGGUGGCGUAUGAGUCAUAUGUGAUGAAUACGUGUCU    | GGAACUCUGAGGUCCAC                                         |
| 56305_ | 709.5/1 |    |       |      |   |                                                            |                                                           |
| x2     | 39624-  |    |       |      |   |                                                            |                                                           |
|        | 139553  |    |       |      |   |                                                            |                                                           |
| ex3_55 | ENST0   | 18 | 4E-05 | 36.2 | 2 | CAGTCCAGCCTCTGATGAAGCCTATGTTAGTAGGCACATCTGAGTGGTAATGAATGC  | CAG                                                       |
| 58303_ | 000036  |    |       |      |   |                                                            |                                                           |
| x2     | 4021.1  |    |       |      |   |                                                            |                                                           |
| ex3_55 | CM000   | 15 | 0.004 | 30.2 | 2 | GTCCTTTTGTAGTTCTTCAGCAGGATGACTGGGTGTTTCATGCTCCTATGTGAGATGT | GCTTTCTCAAACCTCAAACCTTGCTGGCAAGCAGTGAGTCAAGGCTGTTCTGAGT   |
| 58697_ | 664.2/7 |    |       |      |   |                                                            |                                                           |
| x2     | 093041  |    |       |      |   |                                                            |                                                           |
|        | 5-      |    |       |      |   |                                                            |                                                           |
|        | 709303  |    |       |      |   |                                                            |                                                           |
|        | 03      |    |       |      |   |                                                            |                                                           |
| ex3_55 | CM000   | 19 | 0.003 | 30.2 | 2 | CTCATACCTAAACCCAAGAATCACTTTCTTATAGTGATGATTTAAACAGATGCAAACA | GCGAGCACATCTTGTACACCTTTGCGGGACTGTGGCTGTGCCCTCGCAGTAAATTTG |
| 58713_ | 667.2/1 |    |       |      |   |                                                            |                                                           |
| x2     | 592301  |    |       |      |   |                                                            |                                                           |
|        | 94-     |    |       |      |   |                                                            |                                                           |

|        |            |    |       |      |   |                                                             |  |
|--------|------------|----|-------|------|---|-------------------------------------------------------------|--|
|        | 159230     |    |       |      |   |                                                             |  |
|        | 322        |    |       |      |   |                                                             |  |
| ex3_55 | ENST0      | 16 | 0.000 | 32.2 | 2 | TGTGTATGATGAGATTTCACTTCATGGTCTGTGTTTCTGAAACACATGATGTTGTGGA  |  |
| 60379_ | 000045     |    | 8     |      |   | AG                                                          |  |
| x2     | 9604.1     |    |       |      |   |                                                             |  |
| ex3_55 | ENST0      | 15 | 0.002 | 30.2 | 2 | CTTGCCAGCCCCATAGACACAGTTGCTGTGCTGTGCCTGTACTATTGGAGCAAAGAA   |  |
| 61921_ | 000036     |    |       |      |   | AAA                                                         |  |
| x2     | 5346.2     |    |       |      |   |                                                             |  |
| ex3_55 | AC012      | 15 | 0.006 | 30.2 | 2 | AUCCAAGGGGAUUCCCUCUCCAAGGGAACAUGCAGUGCCCCUCUCAGGAAAGUAA     |  |
| 63101_ | 119.8/9    |    |       |      |   | CAACCUGGAAUAGAAUCUGGCAUGCCUAAGGUCUUUGAGGAAUAGAGGAAUAGAG     |  |
| x2     | 2875-93023 |    |       |      |   | GAUGCUUGUUUCCUCUGCCUUCUUGGCUGCCUACAUGG                      |  |
| ex3_55 | AJ6094     | 29 | 2E-11 | 58   | 2 | UCCUCCUACAAAGGCGUGUCUGUGGUUCCCUGUCUUUGGACACGUAAGAAUUGG      |  |
| 63185_ | 74.1/1-132 |    |       |      |   | AGGAAAAUAAAUGUGGAUUUGGGAAACUUUGAGGCCAGCUUGCUUCUUGCAGGCU     |  |
| x2     |            |    |       |      |   | CAUGAUC AACCAUCUCACAUAA                                     |  |
| ex3_55 | ENST0      | 14 | 0.008 | 28.2 | 2 | TTTATCAATGGCATGATTTTAAAGCTGTTTCACCCGAGTACACAGCAGGGAAGCCATC  |  |
| 63751_ | 000062     |    |       |      |   | CT                                                          |  |
| x2     | 0099.1     |    |       |      |   |                                                             |  |
| ex3_55 | ENST0      | 21 | 6E-07 | 42.1 | 2 | CTTCCCATTTATTTGCTGCTATAGTCTCATAATGATACAAGCAGTTATATGCATGGGAT |  |
| 64073_ | 000038     |    |       |      |   | A                                                           |  |
| x2     | 3922.1     |    |       |      |   |                                                             |  |
| ex3_55 | ENST0      | 20 | 2E-06 | 40.1 | 2 | ATCCTTTTGTAGTTCATGAGCGTGATGATTGGGTGTTTCATACGCTTGTGTGAGATGTG |  |
| 64109_ | 000045     |    |       |      |   | CC                                                          |  |
| x2     | 9299.1     |    |       |      |   |                                                             |  |
| ex3_55 | CM000      | 15 | 0.004 | 30.2 | 2 | TAGAAGTGACTGGAGTTGTTGATGGATGGACAGAGACATCGTGCTGATTGCCATGTT   |  |
| 65127_ | 685.2/9    |    |       |      |   | CTGATTGA                                                    |  |
| x2     | 414717     |    |       |      |   |                                                             |  |
|        | 0-         |    |       |      |   |                                                             |  |
|        | 941472     |    |       |      |   |                                                             |  |
|        | 34         |    |       |      |   |                                                             |  |
| ex3_55 | CM000      | 17 | 0.000 | 34.2 | 2 | AAGATTATATTTCCAGGGGTCATTTCTGTGGTTCATTAAGGAGTTTCCCAAG        |  |
| 65151_ | 665.2/6    |    | 3     |      |   | TGTGTAGAGCACTGGAAACACAGGAAGATATGCAATGTTCTCTCCCGAGCACGAAG    |  |
| x2     | 085660     |    |       |      |   | CTCGTTCTTGGTGTGCTTCATTGCAACTGCCATTTGCCATTGATCATTGTTTTTTCT   |  |
|        | 5-         |    |       |      |   | TCCTTTGGGGAGATTAAGAGGAAGAGGACACAGTCTGAGTGAT                 |  |
|        | 608563     |    |       |      |   |                                                             |  |
|        | 89         |    |       |      |   |                                                             |  |
| ex3_55 | CM000      | 20 | 2E-06 | 40.1 | 2 | AAGACTATGCTTTCAGGGATCATTCTATAGTTCGTTACTCGGGAAGTTTCTCTGAAC   |  |
| 65261_ | 672.2/8    |    |       |      |   | GTGTAAAGCACCCGAACAAA                                        |  |
| x2     | 705024     |    |       |      |   |                                                             |  |
|        | 6-         |    |       |      |   |                                                             |  |

|        |         |    |       |      |   |                                                              |  |
|--------|---------|----|-------|------|---|--------------------------------------------------------------|--|
|        | 870503  |    |       |      |   |                                                              |  |
|        | 22      |    |       |      |   |                                                              |  |
| ex3_55 | CM000   | 14 | 0.009 | 28.2 | 2 | CCTCCTTTTCTTGTGTCAGGGACTGAGTGTGTGGTCCTGCTCCTGTTATGTATGGAGGC  |  |
| 65861_ | 667.2/4 |    |       |      |   | AAAGGGAAAGGGCTCCGGCCCCCTCAAATCATGTCTTTGGTGCCAGCCGGTTCTG      |  |
| x2     | 079020  |    |       |      |   | TTCTCAGTCACCTGGATACTG                                        |  |
|        | 4-      |    |       |      |   |                                                              |  |
|        | 407900  |    |       |      |   |                                                              |  |
|        | 71      |    |       |      |   |                                                              |  |
| ex3_55 | ENST0   | 15 | 0.004 | 30.2 | 2 | GGGTCAATGATGAGAACCCTATATTGTGTTGAAGAGAGGTGATGACTTAAATTACCA    |  |
| 65901_ | 000036  |    |       |      |   | TG                                                           |  |
| x2     | 4461.1  |    |       |      |   |                                                              |  |
| ex3_55 | ENST0   | 14 | 0.009 | 28.2 | 2 | AAGCTTGTACTCTCAGTGATCATTGCTGTAGTTACGAGATAAGCTTCTCTGAACATGC   |  |
| 66507_ | 000040  |    |       |      |   | AG                                                           |  |
| x2     | 8117.2  |    |       |      |   |                                                              |  |
| ex3_55 | CM000   | 15 | 0.003 | 30.2 | 2 | ATTCTTTTGTGGCTCATAAGCTTGGGATTTTACACTAAACATTTTTAACTCATGAGGT   |  |
| 67595_ | 667.2/1 |    |       |      |   | TGGGACTTACATTAATCTCTAATCTTTGAGATTGCCTCCCTCAAACCTTGCTACAGT    |  |
| x2     | 227960  |    |       |      |   | ATTGGCACATTACCCATCTCACA                                      |  |
|        | 88-     |    |       |      |   |                                                              |  |
|        | 122796  |    |       |      |   |                                                              |  |
|        | 227     |    |       |      |   |                                                              |  |
| ex3_55 | CM000   | 14 | 0.009 | 28.2 | 2 | AAGACTGTACTTTCAGGGATCATTCTGTTGTTTGCTACTAGAGAAGCTTCTCTGAAT    |  |
| 68037_ | 670.2/2 |    |       |      |   | GTGTACAGCATGTGGACATGTGTGCACACATG                             |  |
| x2     | 878245  |    |       |      |   |                                                              |  |
|        | 0-      |    |       |      |   |                                                              |  |
|        | 287825  |    |       |      |   |                                                              |  |
|        | 39      |    |       |      |   |                                                              |  |
| ex3_55 | ENST0   | 17 | 0.000 | 34.2 | 2 | AAGACTGTACGTTCCAAGATTGTTTCTATAGTTGGTTGTGAGAGAAGTTTCTCTGAAC   |  |
| 68977_ | 000039  |    | 1     |      |   | TT                                                           |  |
| x2     | 1065.2  |    |       |      |   |                                                              |  |
| ex3_55 | AC016   | 49 | 4E-23 | 97.6 | 2 | GGUCUCUCAGCUCUGCUUAACCACACGGGUCCAGUGUGUGCUUGGCGUGUUUUC       |  |
| 69293_ | 907.6/1 |    |       |      |   | AGGGAGGCAGAGAAAGGCUCUCCUAAUGCACGACAGACCCGCCAGAAUGGCCUC       |  |
| x2     | 86868-  |    |       |      |   | UCUGUUCCUAGGAGUGUGACAAUU                                     |  |
|        | 187000  |    |       |      |   |                                                              |  |
| ex3_55 | CM000   | 22 | 1E-07 | 44.1 | 2 | ATTCTTTTCGTAGTTTCGTAAGCTGGATTATTGAGTATTCACACACGTGTGTGAGATGTG |  |
| 69531_ | 669.2/1 |    |       |      |   | CCACCCTTGAACCTTGTTACAACGTGGGCACATTATCACTTGACA                |  |
| x2     | 403756  |    |       |      |   |                                                              |  |
|        | 66-     |    |       |      |   |                                                              |  |
|        | 140375  |    |       |      |   |                                                              |  |
|        | 563     |    |       |      |   |                                                              |  |
| ex3_55 | ENST0   | 16 | 0.001 | 32.2 | 2 | CTGATTCAACTATGATTTTTATTTGTTTGACTGATTTTCTTTTGGATAATGAAGGTATC  |  |

|        |                    |    |       |      |   |                                                              |
|--------|--------------------|----|-------|------|---|--------------------------------------------------------------|
| 69977_ | 000045             |    |       |      |   | T                                                            |
| x2     | 9482.1             |    |       |      |   |                                                              |
| ex3_55 | AC010              | 14 | 0.008 | 28.2 | 2 | CUACCAAAGUUAAUUUUUUUAUGGGGAAGGCUUUCUAAAUAACCUUUACCAAUUU      |
| 70487_ | 746.8/1            |    |       |      |   | GGGCUAUUUUGGGAGAGUAAAGGAAAGACCACACUCCACAGCGGGCUAUACCAAUA     |
| x2     | 40334-140470       |    |       |      |   | GUUCACUACUAAUUUGUGGUCUACAUU                                  |
| ex3_55 | AC020              | 26 | 1E-09 | 52   | 2 | UGCACUUAUGUAUGUUUUUGUUUAACUUGUGGACAAAGACUUAUGGAUAGGUGCA      |
| 70667_ | 602.6/1            |    |       |      |   | AAAAUAAAUCCUCUUUUUGCAACCCAGAACUCAUUGUUCAGUAUGAGUUUUGAUAC     |
| x2     | 36573-136700       |    |       |      |   | AUAUAAGAAGGGAUUU                                             |
| ex3_55 | ENST0              | 16 | 0.001 | 32.2 | 2 | TAGACTTGTGCATGTTTTTGTCTTAACCTTGTGGATAAAGTCTTACAGACAGGTGCAAAA |
| 72471_ | 000039             |    |       |      |   | AA                                                           |
| x2     | 1153.1             |    |       |      |   |                                                              |
| ex3_55 | CM000              | 15 | 0.003 | 30.2 | 2 | ATCCTTTTGTAGTTCATAAATGTGATAATTGGGTGTTACGTGCATGTATGAGATGTC    |
| 73291_ | 674.2/1            |    |       |      |   | TGAGTCCCTCAAACCTTGTTACAACATTGGTACATTACCCATTTTACC             |
| x2     | 00402145-100402250 |    |       |      |   |                                                              |
| ex3_55 | CM000              | 16 | 0.000 | 32.2 | 2 | TCACATTTTATCAACCAAATGAATTAGGGAAAAAAGTTCATGCCCAGGGGTGAGACTA   |
| 74901_ | 667.2/6            |    | 8     |      |   | TAGTGCCAGAACACTTGCTTGTGCATAATTAAGGCCACTTGCCCTCTTCAGGTAGCC    |
| x2     | 5961319-65961183   |    |       |      |   | CTTTTAACTGGGAGCAAAGTGA                                       |
| ex3_55 | ENST0              | 14 | 0.009 | 28.2 | 2 | GAGGTACGAGGAAACAGTCTGATAGTCACTGAAGACTGATTAGATCCAACCTCTGATC   |
| 78639_ | 000039             |    |       |      |   | TCA                                                          |
| x2     | 1191.1             |    |       |      |   |                                                              |
| ex3_55 | CM000              | 19 | 0.004 | 30.2 | 2 | ATCCTTTTATAGCTCATAAGTGTGATAACTGGATTTTCACTCTCCTGTGTGAGATGTG   |
| 78941_ | 677.2/6            |    |       |      |   | CTTCCCTCAAACCTTGTTACATCAGCACATTACGTGTCTGATT                  |
| x2     | 5571073-65570973   |    |       |      |   |                                                              |
| ex3_55 | CM000              | 18 | 0.008 | 28.2 | 2 | GTCCTTCTGTAGTTCATGAGCGTGAAGATTGGGTGCTCACGGGCACATGTGAAATGT    |
| 79689_ | 664.2/2            |    |       |      |   | GCCACCCTCTGAACCTTGTTACAACATCGGCACATTACCCATCTGACC             |
| x2     | 22698000-222697896 |    |       |      |   |                                                              |

|                        |                                                    |    |       |      |   |                                                                                                                                                                                                    |
|------------------------|----------------------------------------------------|----|-------|------|---|----------------------------------------------------------------------------------------------------------------------------------------------------------------------------------------------------|
| ex3_55<br>80153_<br>x2 | ENST0<br>000036<br>2763.1                          | 14 | 0.009 | 28.2 | 2 | ATGCAGGTA<br>CTGTTACA<br>ATGACTGA<br>AGTGATTT<br>GTTGTCAT<br>TTCCCCTG<br>CTTAAAG<br>CC                                                                                                             |
| ex3_55<br>80831_<br>x2 | CM000<br>675.2/9<br>521034<br>4-<br>952104<br>48   | 14 | 0.009 | 28.2 | 2 | ATCCTTTT<br>GTAGTTC<br>ATGAGCAT<br>GATAATCG<br>GGGTGTT<br>CACGCACT<br>TGTGTGAG<br>ATGTGCC<br>ACCCTTGA<br>ATTTTGT<br>TATGATG<br>TTTCCACA<br>AATAGCCC<br>ATCTGACA                                    |
| ex3_55<br>81971_<br>x2 | CM000<br>664.2/1<br>856617<br>74-<br>185661<br>906 | 14 | 0.008 | 28.2 | 2 | TTATCAGCT<br>GGGATAAT<br>CTTTACCT<br>GTTCTTCT<br>TTTTGGAG<br>GGGCAAAT<br>TAGGACAT<br>GATTGGGG<br>TTCACATAG<br>TATGCGATT<br>AACGTCTCT<br>GAGTAATC<br>AGGACTTCC<br>AGTACCCT<br>GATTGTGC<br>CTATCTGAT |
| ex3_55<br>83081_<br>x2 | ENST0<br>000045<br>9452.1                          | 15 | 0.004 | 30.2 | 2 | ATCCTTTT<br>GCAGTTC<br>ATGAACAT<br>GATGATTG<br>GGGTGTT<br>CATGCTCAT<br>GTGTGAG<br>ATGTGCC<br>CC                                                                                                    |
| ex3_55<br>83991_<br>x2 | CM000<br>670.2/7<br>060453<br>2-<br>706046<br>37   | 16 | 0.001 | 32.2 | 2 | ACCCTTTT<br>GTAGTTC<br>ACAAGTGT<br>GATGATTG<br>GGGTTT<br>CACGCTT<br>ATATGTG<br>AGATGTG<br>TCTCTCC<br>CTCAAAC<br>TTTGTTC<br>TGACCTG<br>AGCACCT<br>TACCTGT<br>CATAAA                                 |
| ex3_55<br>84183_<br>x2 | ENST0<br>000036<br>4773.1                          | 31 | 1E-12 | 61.9 | 2 | TTGCATTCT<br>TAAACCCT<br>CTTGGTGG<br>CTTCCCTG<br>TAAATGCT<br>TCCAAGAT<br>ATGAGCGAA<br>TG                                                                                                           |
| ex3_55<br>84259_<br>x2 | ENST0<br>000036<br>4632.1                          | 14 | 0.008 | 28.2 | 2 | ATGTGATGC<br>CTCTGATG<br>AAGCCTAT<br>GTTAGTAG<br>AGACATCT<br>GAGAGTGT<br>AGATGAAT<br>GCC                                                                                                           |
| ex3_55<br>84603_<br>x2 | CM000<br>666.2/1<br>683106<br>92-<br>168310<br>795 | 15 | 0.004 | 30.2 | 2 | ATCCTTTT<br>GTAGTTC<br>ATAAATGT<br>GATGATTG<br>GGTTTT<br>CATGTGT<br>ATGTGTTG<br>GATGTGCC<br>CTACTCA<br>ATCCTTG<br>TTACAAAG<br>TTATCTCA<br>TTATCCGG<br>CTGGCA                                       |
| ex3_55<br>85011_<br>x2 | ENST0<br>000058<br>4451.1                          | 20 | 0.001 | 32.2 | 2 | CATGTATA<br>ATGATATA<br>TTGGTAAC<br>ACTGCAG<br>ACTTGGGG<br>AAGCCAG<br>CCAACCT<br>TGGAAT<br>GAT                                                                                                     |
| ex3_55                 | CM000                                              | 15 | 0.004 | 30.2 | 2 | ATCTTTT<br>GTAGTTC<br>CTAAGTGT<br>GATGATTG<br>GGGTGTT<br>CACAGGC<br>ATGTGTG<br>AGATGGC                                                                                                             |

|                 |                                                    |    |       |      |   |                                                                                                                                                                                                                                   |
|-----------------|----------------------------------------------------|----|-------|------|---|-----------------------------------------------------------------------------------------------------------------------------------------------------------------------------------------------------------------------------------|
| 85539_x2        | 669.2/9<br>527658<br>6-<br>952766<br>84            |    |       |      |   | CTCCCTCAAACCTTGTTATGACATTGGCATAACCCAAAAAAA                                                                                                                                                                                        |
| ex3_55_85775_x2 | CM000<br>663.2/2<br>047279<br>91-<br>204728<br>106 | 19 | 0.002 | 30.2 | 2 | CGCCTTTCTCCCATGGGCTGTGTGGGGTCCCTGTTCTTCGCAGCTAAGGCTGGAGG<br>CCAAGATCAGCCTTTGAGGACTGTCATCAGAATTGCCTTGCTTTCCTGCCTCAGATG<br>TGA                                                                                                      |
| ex3_55_85805_x2 | CM000<br>664.2/1<br>140056<br>55-<br>114005<br>440 | 29 | 4E-09 | 50.1 | 2 | AAGACTGTAGTTTCAGGGATTGTTTCTATAGTTTGCTACTAGAGAAGTTTCTCTGAAC<br>GTGTAGAGCCCCGAAACCCCGGGTGGTGGTGCAGCATCCTCTCTTGAGGTGAAG<br>CCGGCTTTTGGTGTTCCTCACTGCAACTACCTTTTGCCATGGATGATTGTCCTTCTC<br>CTCCTCTGGCAGAGGGAGAGGGAGAGGACATAAGTCTGAGTGGT |
| ex3_55_88125_x2 | ENST0<br>000038<br>4614.1                          | 42 | 5E-19 | 83.8 | 2 | TTGCACAGTGAACACCCAAGTGTGCTTTATAGTTCCTTGGCTTTGACCCTGTGCTA<br>GAG                                                                                                                                                                   |
| ex3_55_88193_x2 | ENST0<br>000038<br>4504.1                          | 40 | 7E-18 | 79.8 | 2 | TGAGCACTTTCACAGGTCCTCCCTCAGGCTGTGGGGCCAGGATTTGGTAGCTGGTG<br>CTGA                                                                                                                                                                  |
| ex3_55_89545_x2 | ENST0<br>000036<br>4172.1                          | 28 | 6E-11 | 56   | 2 | CCCTCCTACAAAGGCATGTCTATAATTCCTTGTCTTTGGACATGTAAGAATTGGAGGG<br>AC                                                                                                                                                                  |
| ex3_55_89817_x2 | ENST0<br>000036<br>5075.1                          | 18 | 0.009 | 28.2 | 2 | CTACAGCCAACCTCAGCTGGCTGAGTTCCTCGCCTCATGGGGGACGTGTGCAATGGC<br>TGCA                                                                                                                                                                 |
| ex3_55_92301_x2 | CM000<br>672.2/6<br>017194<br>-<br>601705<br>4     | 14 | 0.009 | 28.2 | 2 | ATGCATCTTAGAACATCCAGGAGACAGTCTTCTAAAATACCAGTGAGTGGCAAGATAT<br>GAGTAAATTCACAGGAAAAGGAAGGCAGTCCAAAGGGCTGTGCTTCTCCTGTGGC<br>TCAGTGTTATTCATAGCTGTGACATCT                                                                              |
| ex3_55_93299_x2 | AL132<br>709.5/1<br>64433-<br>164362               | 21 | 6E-07 | 42.1 | 2 | UGGAUCAUGAUGUCCACUGGUGGCGUAUAAAUCAUUAUUUGGUGAAUUAUGUCU<br>GGAACUCUGAGGUCCAA                                                                                                                                                       |
| ex3_55          | AB007                                              | 22 | 1E-07 | 44.1 | 2 | GGUCUCUCAGCUCCGCUUAACCACACGGGUCCAGUGUGUCUUGGCGUGUUUUC                                                                                                                                                                             |

|        |         |    |       |      |   |                                                               |
|--------|---------|----|-------|------|---|---------------------------------------------------------------|
| 93959_ | 147.1/1 |    |       |      |   | AGGGAGGCAGAGAAAGGCUCUCCUAAUGNACGACAGACCCGCCAGAAUGGCCUC        |
| x2     | 04-236  |    |       |      |   | UCUGUCCUAGGAGUGCGACAAUU                                       |
| ex3_55 | ENST0   | 16 | 0.001 | 32.2 | 2 | AACATAGAGTACACATTTTCTGTTTTGTTTAAGAATTATTCTCTTGCAGACCTATGTTT   |
| 94171_ | 000057  |    |       |      |   | T                                                             |
| x2     | 8183.1  |    |       |      |   |                                                               |
| ex3_55 | ENST0   | 15 | 0.005 | 30.2 | 2 | AGCGCTGACTCCCACATATGCATTCCTTAGAAAGCTGAACAAAATGAGCAAAAAACC     |
| 95249_ | 000051  |    |       |      |   | TCT                                                           |
| x2     | 7176.1  |    |       |      |   |                                                               |
| ex3_55 | CM000   | 15 | 0.002 | 30.2 | 2 | TTGTGAAGACTATTTTCAAGGTTTCAATTTCTATAGTTCACTACTGGAGAAGTTTCTCTGA |
| 95413_ | 685.2/1 |    |       |      |   | ACATGTGGAACACCAGGAAACATGAGGAAGAAGCACAGCATTCTCTCTAAATGTGA      |
| x2     | 139444  |    |       |      |   | AGCCAGCTGTTGGTGTGGCTTTGCTATAACTGCTATTTGCCATTGATGATTATTTTCT    |
|        | 04-     |    |       |      |   | CTTCTTCCCAGAGAGTAAGAGGGAGAGGATGCAGTCTGTGTGGT                  |
|        | 113944  |    |       |      |   |                                                               |
|        | 186     |    |       |      |   |                                                               |
| ex3_55 | ENST0   | 20 | 2E-06 | 40.1 | 2 | TGGACCAATGATGAGACAGTGTTTATGAACAAAAGATCATGATTAATCCAGTTCTGCA    |
| 96869_ | 000045  |    |       |      |   | CA                                                            |
| x2     | 8974.1  |    |       |      |   |                                                               |
| ex3_55 | ENST0   | 14 | 0.008 | 28.2 | 2 | TATGGCCTTTATCAAAGCTGCAGCTGCTTCCATGTAGCTGCTGTGGTCAAAAAGAAG     |
| 97019_ | 000036  |    |       |      |   | CCA                                                           |
| x2     | 4674.1  |    |       |      |   |                                                               |
| ex3_55 | CM000   | 15 | 0.003 | 30.2 | 2 | ATCCTTTTGTAGTTCGTAAGCATGACGATCGGGTTTTTACATACATGTCTCAGAAGTG    |
| 97945_ | 677.2/4 |    |       |      |   | CCTCTCTCAAACCTTGTTACGTCAGCACATTACCTGTCTTACA                   |
| x2     | 270879  |    |       |      |   |                                                               |
|        | 2-      |    |       |      |   |                                                               |
|        | 427086  |    |       |      |   |                                                               |
|        | 92      |    |       |      |   |                                                               |
| ex3_55 | CM000   | 15 | 0.002 | 30.2 | 2 | GCATGGTAGTGGGTTTCAATGGGGGCCCTTCTCTGTGGCCTCATAGCGTACCCATG      |
| 98321_ | 663.2/1 |    |       |      |   | CCAGTGTAACCTTGAGCCTTGAACCATTGCCAGCCTCCTTCCCATGGGCTGTGTGT      |
| x2     | 156220  |    |       |      |   | AGCGAAGGGGGTTGCACAGTG                                         |
|        | 05-     |    |       |      |   |                                                               |
|        | 115621  |    |       |      |   |                                                               |
|        | 872     |    |       |      |   |                                                               |
| ex3_55 | AC137   | 28 | 6E-11 | 56   | 2 | CUUCCUCAGCCUUACUCCAGGGACUUUUUGUUGCCUGUAAAGUGCUCUGGCAUU        |
| 98585_ | 590.2/6 |    |       |      |   | GCCUGAGGAUAGAUGAGAAAGCACAUAUCCUCCCCAGUAAGACGCUGUUUUCUU        |
| x2     | 1748-   |    |       |      |   | UUGGGGCCUACAAGUUGAGCUGACAGU                                   |
|        | 61613   |    |       |      |   |                                                               |
| ex3_55 | CM000   | 14 | 0.008 | 28.2 | 2 | AAGACTATTCTTTTCAAGGATCATTATGCGAGAAGTTTTTCTGAATGCCTAAAGAACCA   |
| 98679_ | 663.2/1 |    |       |      |   | GAAAACCATGAGGACAGACAGCAGCATTCTCTCTGAGCTTGAAGCTGGCTCTTGGC      |
| x2     | 639236  |    |       |      |   | ACTGGTTTGTGCAACTGCCGTTTGCATTGCTGATCATTTTTCTCTTCTTTGGGAG       |
|        | 70-     |    |       |      |   | AGTGAGGGGAAGAGAATGCAATCTGAGTGAT                               |

|        |                              |    |       |      |   |                                                              |  |
|--------|------------------------------|----|-------|------|---|--------------------------------------------------------------|--|
|        | 163923                       |    |       |      |   |                                                              |  |
|        | 873                          |    |       |      |   |                                                              |  |
| ex3_55 | ENST0                        | 14 | 0.008 | 28.2 | 2 | AAGACTGTATTTTCAGGGATCATGTCTATAGGTCATTTCTAGAGAAGCTTCTCTGAAC   |  |
| 99201_ | 000040                       |    |       |      |   | AT                                                           |  |
| x2     | 8706.2                       |    |       |      |   |                                                              |  |
| ex3_55 | AC096                        | 18 | 0.009 | 28.2 | 2 | GCUAUCCUGGACUUGCCAGCCCAUAGACACAGUUGCUGUGCUGUGCCUGUACU        |  |
| 99781_ | 587.1/2                      |    |       |      |   | AUUGGAGCAAAGAAAAAGUGGCUAUUUCUAUGCUCAGUGUUCACAAACCAGUGAG      |  |
| x2     | 5864-<br>25727               |    |       |      |   | CACUAAGAAUGGUUUUAGCCUGACAUUU                                 |  |
| ex3_55 | CM000                        | 15 | 0.003 | 30.2 | 2 | AAGACTATACTTTTCAGGGATCATTTCTATAGTTTGTTCCTAGAGAAGTTTCTCCGAATG |  |
| 99791_ | 677.2/3                      |    |       |      |   | TGTAGAGCACTGCTTAATCTTTTAAATTTAGA                             |  |
| x2     | 901581<br>1-<br>390159<br>01 |    |       |      |   |                                                              |  |
| ex3_55 | CM000                        | 15 | 0.002 | 30.2 | 2 | ATCCTTTTGTAGTTTCTAAGCGGGATGATTGGGTGTTACGCGCATGCGTGAGATGT     |  |
| 99849_ | 681.2/5                      |    |       |      |   | GCCTCCCTCAAACCTTGTTACGACATCGGCACATTACTCTTCTGACA              |  |
| x2     | 516717<br>1-<br>551672<br>74 |    |       |      |   |                                                              |  |
| ex3_56 | ENST0                        | 18 | 0.009 | 28.2 | 2 | CCTGCCAGCTGCACAGATGCAGATGCTCTGCTATGCCTGTAACATCGGGGCGAAGT     |  |
| 00125_ | 000036                       |    |       |      |   | GAAA                                                         |  |
| x2     | 2945.2                       |    |       |      |   |                                                              |  |
| ex3_56 | ENST0                        | 26 | 8E-10 | 52   | 2 | GGTCAATGATGTAATGGCATGTATTAGCTGAATCTAAAGTTGATGTGAGTTCTAAAAT   |  |
| 01945_ | 000036                       |    |       |      |   | TA                                                           |  |
| x2     | 4617.1                       |    |       |      |   |                                                              |  |
| ex3_56 | AC015                        | 19 | 0.003 | 30.2 | 2 | GGUUGUGGUGGUUUUCUUUCUGGUACAUUUGUUAAGUUUUCAAAUGAGCCUAAC       |  |
| 02709_ | 982.9/4                      |    |       |      |   | UCUGCCACAUUAUCAUAUAGGAGCUGGCAAAGGCUUGAUGACAAAGAGAUCUCU       |  |
| x2     | 5601-<br>45748               |    |       |      |   | CUCAAGCCUUUCCACAUCAGAGGCUGGCUUUCACACAC                       |  |
| ex3_56 | CM000                        | 14 | 0.009 | 28.2 | 2 | GCAGACTCACTGTGCACCTGGCTGCAGGCCAGGTGGGTGCTCGTTCCCTCTGCAA      |  |
| 02851_ | 677.2/6                      |    |       |      |   | GAGAAACAAACATTCCAGGGTGCTGTGGCTGCCTGACCTATAAGGGCGATGCAGCT     |  |
| x2     | 932542<br>0-<br>693252<br>93 |    |       |      |   | GCCTGGGGATAGACAG                                             |  |
| ex3_56 | CM000                        | 18 | 4E-05 | 36.2 | 2 | CTGCATCCACTGATAGACCTTGGACAGTTTGCTGTTTTTTTTTTGTTTGTGTTTGTGTT  |  |
| 03237_ | 664.2/4                      |    |       |      |   | GTTTGTGTTTGTGTTGCTCTGGGGATGCAAAAGAGGGAAATCCCTGCACTTCTCTCTG   |  |
| x2     | 827155                       |    |       |      |   | TCTTTGTGGCAGCCGGGATTGAATTGGGGAATGCATCT                       |  |

|        |         |    |       |      |   |                                                             |
|--------|---------|----|-------|------|---|-------------------------------------------------------------|
|        | -       |    |       |      |   |                                                             |
|        | 482700  |    |       |      |   |                                                             |
|        | 1       |    |       |      |   |                                                             |
| ex3_56 | CM000   | 15 | 0.002 | 30.2 | 2 | ATCCAAGGTGATTCCCTCTCCAAGGGGAACATCCAGTGCCCCTCTCAGGAAAGTAGC   |
| 03525_ | 663.2/1 |    |       |      |   | AACCTGGAACAGAATCTGGCATGCCTAAGGCATTTGGGGAACAGGGCTGGTTATTC    |
| x2     | 792014  |    |       |      |   | CTCTGCCTTCCTTGGCTGCCTACATGG                                 |
|        | 87-     |    |       |      |   |                                                             |
|        | 179201  |    |       |      |   |                                                             |
|        | 627     |    |       |      |   |                                                             |
| ex3_56 | ENST0   | 15 | 0.007 | 30.2 | 2 | CCCTATATTCGAAAGTTATCCTGGTCATTGACAGTGCAGGGAGAGAACTGCTGAAA    |
| 03993_ | 000036  |    |       |      |   | GCA                                                         |
| x2     | 4523.1  |    |       |      |   |                                                             |
| ex3_56 | AC007   | 25 | 3E-09 | 50.1 | 2 | GGCCUCCUGGUACUUACCCACAGGCUGCGUUCUUACACUGGCUGUACAGAAAGAG     |
| 05161_ | 240.2/1 |    |       |      |   | GAGCUAGAGUAAACCUACC UAAUACACCUCAGCCCAGGCCUGUGCCUGGUCU       |
| x2     | 63812-  |    |       |      |   | GUAUUGUGAAUGGGGGGGACA UAG                                   |
|        | 163679  |    |       |      |   |                                                             |
| ex3_56 | AC090   | 15 | 0.002 | 30.2 | 2 | UCAUCAGGUGGGAUAAUCCUUACCUUGUCCUUGUUUGGAGGGCAGAUAGAACAG      |
| 06081_ | 233.16/ |    |       |      |   | GAUAAUUGGAGUUUGCAUGAUCCAUGAUUAAUGUCUCUGUGUAAUCAGGACUUGC     |
| x2     | 1998-   |    |       |      |   | AAACUCUGAUUGUUCAUAUCUGAU                                    |
|        | 1865    |    |       |      |   |                                                             |
| ex3_56 | CM000   | 19 | 0.006 | 30.2 | 2 | AAGATTATACTTTTCAGGAATCATTTCTATAGTTTGTACTAGAGAAAGTTCTCTGAATG |
| 06365_ | 665.2/6 |    |       |      |   | TGTAAAGCATGAAAAACCACAAGGAGACACAGTGTCTGCTCCTGACTGAAAAGCCAG   |
| x2     | 407201  |    |       |      |   | CTCTTGGTGTGCTCTGCTGCAACTGCTATTTGCCATTGATAACCATTCTTCTCTTCC   |
|        | 9-      |    |       |      |   | TCTGGGATAGTAAGAGGGAGAGACTGCAGTCTGAGTGGT                     |
|        | 640718  |    |       |      |   |                                                             |
|        | 07      |    |       |      |   |                                                             |
| ex3_56 | CM000   | 15 | 0.002 | 30.2 | 2 | TTGATCACAGGACCCCTTTACACTCGTAAATAAATTATTGATGTACCAGACAGCCTGA  |
| 07659_ | 673.2/1 |    |       |      |   | CCCTGACCTCAAGTAAATTCCCAGGAGACGCCTTTCTGGGTTTTGAATTTGCCGTA    |
| x2     | 290498  |    |       |      |   | ACAGGTGTGAGCATTCTAGCAGCAGTTTGGTGTATCATGTACGATACTGCAAACAGGA  |
|        | 8-      |    |       |      |   |                                                             |
|        | 129048  |    |       |      |   |                                                             |
|        | 17      |    |       |      |   |                                                             |
| ex3_56 | AL132   | 29 | 2E-11 | 58   | 2 | UGGAUCGAUGAUGACUACUGGUGGCGUAUGAGUCAUCUACAGUGAAUACGUCUCU     |
| 09065_ | 709.5/1 |    |       |      |   | GGAACUCUGAGGUCUGU                                           |
| x2     | 40595-  |    |       |      |   |                                                             |
|        | 140524  |    |       |      |   |                                                             |
| ex3_56 | ENST0   | 16 | 0.000 | 32.2 | 2 | ATGCATCTACTATGTGACAGACCTGGAGCAGTTCCTGTCTGCTGCTAAGGTTCCAC    |
| 09219_ | 000051  |    | 9     |      |   | TAC                                                         |
| x2     | 7250.1  |    |       |      |   |                                                             |
| ex3_56 | CM000   | 14 | 0.008 | 28.2 | 2 | ATACTTTTGTAGCTCATAAGCATGATGATTCAGTGTCCAAGTGCATGCATGAGATGTG  |

|                        |                                                    |    |            |      |   |                                                                                                                                                                                                                                                 |
|------------------------|----------------------------------------------------|----|------------|------|---|-------------------------------------------------------------------------------------------------------------------------------------------------------------------------------------------------------------------------------------------------|
| 09411_<br>x2           | 664.2/2<br>181850<br>82-<br>218184<br>979          |    |            |      |   | CCTCCCTCAAACCTTGTCAACAACATCAGCACGTTGCTCATCTGACA                                                                                                                                                                                                 |
| ex3_56<br>10151_<br>x2 | BK005<br>567.1/2<br>9-108                          | 47 | 6E-22      | 93.7 | 2 | GAUCAAUGAUGAAACUAGCCAAAUCUGAGCAUCAGAAGUCUUUCCAGUCUACCUG<br>AUGCAUGAUCUCUACAGUUCUGAGA                                                                                                                                                            |
| ex3_56<br>10999_<br>x2 | CM000<br>679.2/5<br>024500<br>4-<br>502448<br>96   | 16 | 0.001      | 32.2 | 2 | ATTCTTTTGCTGTTTCGTAAGCATAAGGATCAGGTATTCATGGTCATGTGTAAGACGTG<br>CCTCCCTCAAACCTTGTTACGATGTGGACGTCAGCACATACCCATTTGATG                                                                                                                              |
| ex3_56<br>11493_<br>x2 | CM000<br>669.2/2<br>526465<br>6-<br>252648<br>82   | 14 | 0.009      | 28.2 | 2 | GAGATTATACTTTTCAGGGATCAATTCTATAGTTTGTTACTAGGGAAGTTTCTCTGAAT<br>GCGTACAGACCTGCAGAAGAGCAGCAGAACCCATGAGGAGAAGGCCGAGGATGAT<br>CCTGAGCATGAAGCTGGCTCATGGAGTTGCTTTGCTGCTACTGTCACTTGCCATTGA<br>TGATCGTTCTTCTTCTTTGAGAGGAAGAGGGGGAGAAAGCAGTTGGAGTGG<br>T |
| ex3_56<br>14629_<br>x2 | CM000<br>670.2/2<br>203235<br>0-<br>220324<br>52   | 15 | 0.004      | 30.2 | 2 | AGGCTCTTGTCATTTATAAGTGTGATGATTGGGGTTTCACGCTCGTGTGTAAGGTGT<br>GCCTCCCACAAACCTGGTTACGAGTTGGCACATCACCTGTCTGATG                                                                                                                                     |
| ex3_56<br>15069_<br>x2 | CM000<br>672.2/1<br>190611<br>11-<br>119060<br>983 | 17 | 0.000<br>3 | 34.2 | 2 | GTGCACATTTTCATTGTCTTTTTTCTTTATTTCAAGAGAAAAGATATATCTGATGTGCTC<br>AGCAAACCTTTGGAGGTTAATTAGCAGCATGACTAATTTAGCCATTGCTGCCAGTCAC<br>CTTCAAACAAGT                                                                                                      |
| ex3_56<br>16101_<br>x2 | CM000<br>663.2/2<br>057313<br>52-<br>205731<br>221 | 15 | 0.002      | 30.2 | 2 | CTGCAGATATTCTCACTGTTTTGATTTTGTAAATAGTCAGGACAGGCTAACCATTCACT<br>TTATTAAGACCATGCATATATCCCAGAAGTCTTTCTGAGGTCTAGTTTTATAA<br>ATGTTGCTGATAAAC                                                                                                         |
| ex3_56<br>16697_<br>x2 | CM000<br>680.2/2                                   | 15 | 0.002      | 30.2 | 2 | AAGACTATACTTTTCAGGGATCATTCTATAGTTCTTTACTAGAGAAGTTTCTCTGAACA<br>TGTAGAGCACTGTGCCTTAAAAAAGAAAAAAAAAAGGGC                                                                                                                                          |

|        |         |    |       |      |   |                                                               |  |
|--------|---------|----|-------|------|---|---------------------------------------------------------------|--|
| x2     | 629925  |    |       |      |   |                                                               |  |
|        | 5-      |    |       |      |   |                                                               |  |
|        | 262991  |    |       |      |   |                                                               |  |
|        | 58      |    |       |      |   |                                                               |  |
| ex3_56 | AL132   | 14 | 0.008 | 28.2 | 2 | AAGAUCAAUGAUGACUACUGUUAGUGUAUGAGUUACACAUGAUGAAUACAUGUCU       |  |
| 17237_ | 709.5/1 |    |       |      |   | GAAACUCUGAGGUCCAU                                             |  |
| x2     | 54547-  |    |       |      |   |                                                               |  |
|        | 154476  |    |       |      |   |                                                               |  |
| ex3_56 | ENST0   | 14 | 0.008 | 28.2 | 2 | CCCAAAGTGCTGGGATAACCCTTACCTGTTTCTCCTTTGCAGGGCAGATAGAACATG     |  |
| 18115_ | 000039  |    |       |      |   | ATA                                                           |  |
| x2     | 0947.2  |    |       |      |   |                                                               |  |
| ex3_56 | CM000   | 15 | 0.005 | 30.2 | 2 | AGTTCCTTGAAGTTAAAGGTTAAGCTTAAGGACTGATTCAAAGGCAGGTGCAAAAA      |  |
| 18367_ | 669.2/9 |    |       |      |   | ATAAACCTCTTTTGTAACCCAGAACTCATTTTTCAGTATGAGTTTTGATACATATAAG    |  |
| x2     | 995203  |    |       |      |   | AAGGAAAAGCT                                                   |  |
|        | 3-      |    |       |      |   |                                                               |  |
|        | 999521  |    |       |      |   |                                                               |  |
|        | 58      |    |       |      |   |                                                               |  |
| ex3_56 | ENST0   | 15 | 0.005 | 30.2 | 2 | CCCCTGTGATGAGTTGCCATGCTAATACGGAGACACCAGGTAGGGAGTTTTACCCTA     |  |
| 18663_ | 000036  |    |       |      |   | ACT                                                           |  |
| x2     | 2566.1  |    |       |      |   |                                                               |  |
| ex3_56 | CM000   | 14 | 0.008 | 28.2 | 2 | ATCCTTTTGTAGTTCATAAGCATAATGACTGGGTGCTTACACACATGTGAGATGTGCC    |  |
| 19971_ | 674.2/4 |    |       |      |   | ACCCTCAAACCTTGTTACATTGGCACACTATCCATTTGACA                     |  |
| x2     | 896083  |    |       |      |   |                                                               |  |
|        | 6-      |    |       |      |   |                                                               |  |
|        | 489607  |    |       |      |   |                                                               |  |
|        | 38      |    |       |      |   |                                                               |  |
| ex3_56 | ENST0   | 15 | 0.007 | 30.2 | 2 | CTGCAACCAATTAAGCCGACCTAGTTCCTTTCTCCTTTGGGGCCTGGTGTTC AATAG    |  |
| 20705_ | 000038  |    |       |      |   | CTG                                                           |  |
| x2     | 4492.1  |    |       |      |   |                                                               |  |
| ex3_56 | AL132   | 21 | 5E-07 | 42.1 | 2 | UGGACCAAUGAUGACAACUGCCGGCGUAUGAGUGUUGGGUGAUGAAUAAUACGU        |  |
| 23903_ | 709.5/1 |    |       |      |   | GUCUAGAACUCUGAGGUCCAA                                         |  |
| x2     | 49496-  |    |       |      |   |                                                               |  |
|        | 149422  |    |       |      |   |                                                               |  |
| ex3_56 | ENST0   | 15 | 0.002 | 30.2 | 2 | AAACCCCTGTTCACTTTGCCAAATGGATTTGTGTCTTTATTGCTCATT AATTGGGGCA   |  |
| 24363_ | 000036  |    |       |      |   | AA                                                            |  |
| x2     | 3365.1  |    |       |      |   |                                                               |  |
| ex3_56 | CM000   | 19 | 0.004 | 30.2 | 2 | AAGACTATACTTTTCAGGGATTATTTTCAGATAAACTTCTAGAGTTTCTCTGAACCTGTAG |  |
| 24625_ | 663.2/2 |    |       |      |   | AGCACCAGAAACCATGAAAAGAGGGTGTAGCATTCTCTCCTGCGTGTGAGGCCGGC      |  |
| x2     | 185418  |    |       |      |   | TCTTGGTGCTACCTCACTGAAACTGCCATTGCCACGGATGATCATTCTTCTTACTC      |  |
|        | 99-     |    |       |      |   | TGAGAGAGAAAAGAGAGAGAGAATACAGTCTGAGTGGT                        |  |

|        |         |    |       |      |   |                                                                |  |
|--------|---------|----|-------|------|---|----------------------------------------------------------------|--|
|        | 218541  |    |       |      |   |                                                                |  |
|        | 690     |    |       |      |   |                                                                |  |
| ex3_56 | CM000   | 19 | 2E-05 | 38.2 | 2 | AAGACTATACTTTTCAGGGATCATTCCCTATAGTTTCATCATTAGAGAAGTTCTCTGAACAT |  |
| 24929_ | 670.2/2 |    |       |      |   | GTAGAGCACCCGAGACAAGAAATAACTAAGATCAGA                           |  |
| x2     | 061492  |    |       |      |   |                                                                |  |
|        | 6-      |    |       |      |   |                                                                |  |
|        | 206148  |    |       |      |   |                                                                |  |
|        | 33      |    |       |      |   |                                                                |  |
| ex3_56 | ENST0   | 14 | 0.009 | 28.2 | 2 | ATCCTTTTGTAGTTCATAAGCATGATGATTGGGTTTTTCATGCTTGTGTGTGAGATGTG    |  |
| 24931_ | 000045  |    |       |      |   | CT                                                             |  |
| x2     | 9407.1  |    |       |      |   |                                                                |  |
| ex3_56 | ENST0   | 17 | 0.000 | 34.2 | 2 | GACTTCTCACTGAGCTTCTTTCTGTCTGTTGCTGGCAGCTTATGGATTCATATGAGCA     |  |
| 26035_ | 000039  |    | 2     |      |   | GA                                                             |  |
| x2     | 1318.1  |    |       |      |   |                                                                |  |
| ex3_56 | ENST0   | 16 | 0.000 | 32.2 | 2 | GGCAGCCATGTCAAATTCAGTGCCTGCCCTGTCTATGGTAGGCACTGGCCCAGAAG       |  |
| 27255_ | 000036  |    | 6     |      |   | ACTG                                                           |  |
| x2     | 3786.1  |    |       |      |   |                                                                |  |
| ex3_56 | ENST0   | 14 | 0.009 | 28.2 | 2 | AAGCTAGCCAATGAATCTGCTTACCTAAACATGTTTCTGCAGAAATTTTTATTTTAAAA    |  |
| 28329_ | 000036  |    |       |      |   | A                                                              |  |
| x2     | 5413.1  |    |       |      |   |                                                                |  |
| ex3_56 | CM000   | 14 | 0.008 | 28.2 | 2 | TTCTAAAGTGTTGAGTTCAGTCCAGGGTGGATCCCCTGCTCTGTTAATTGAACTGGA      |  |
| 28449_ | 664.2/2 |    |       |      |   | ACATTTAAACTGGCTAGGCAAATGCCTACATAGAAAGCATTACTCTTTATTCATCCC      |  |
| x2     | 764216  |    |       |      |   | CAGCCTACAAAA                                                   |  |
|        | 9-      |    |       |      |   |                                                                |  |
|        | 276420  |    |       |      |   |                                                                |  |
|        | 43      |    |       |      |   |                                                                |  |
| ex3_56 | CM000   | 19 | 0.006 | 30.2 | 2 | ATCCTTTTGTAGTTCAGGTGCATGTGTGAGTTGTGCCTCCCTCAAACCTTGTTACAAA     |  |
| 30971_ | 663.2/5 |    |       |      |   | GTCAGCACATTACCTGTCTATCA                                        |  |
| x2     | 241144  |    |       |      |   |                                                                |  |
|        | 2-      |    |       |      |   |                                                                |  |
|        | 524115  |    |       |      |   |                                                                |  |
|        | 22      |    |       |      |   |                                                                |  |
| ex3_56 | CM000   | 15 | 0.002 | 30.2 | 1 | ATCCTTTATGGTTCATAAATATGATGAATGGGTTTTACGCTGCTGTGTGAGATATAT      |  |
| 32199_ | 665.2/4 |    |       |      |   | CTCCTTCAAACCTTATATAATTTATATGTTATAATATAATGACCTTTTTATGATGTCAG    |  |
| x1     | 708860  |    |       |      |   | CATATGAATGACCCAGCTGATA                                         |  |
|        | 8-      |    |       |      |   |                                                                |  |
|        | 470887  |    |       |      |   |                                                                |  |
|        | 47      |    |       |      |   |                                                                |  |
| ex3_56 | CM000   | 15 | 0.005 | 30.2 | 1 | AAGACGACGCTTGCAGGGATTGTTTCTATAGCTCACTACCAGATAAGTTTCTCCGAA      |  |
| 32364_ | 683.2/2 |    |       |      |   | CATGTAGAGCACCCAGAAACCACATGCAGCGGTGCAGCGCTCTCTCGGGAGCCTGAC      |  |

|        |         |    |       |      |   |                                                              |
|--------|---------|----|-------|------|---|--------------------------------------------------------------|
| x1     | 918063  |    |       |      |   | ACTGGCTCTGGGTGCTGCTTCACTGCAACTTCCATTTGCCATTGAGAACTGTTCCGC    |
|        | 9-      |    |       |      |   | TCTTCCTCTGGGAAAGTAAGAGAGAGAGGGTGCAATCTGAGGGGT                |
|        | 291804  |    |       |      |   |                                                              |
|        | 25      |    |       |      |   |                                                              |
| ex3_56 | ENST0   | 15 | 0.004 | 30.2 | 1 | ATATAGTTGGACTCAACACCTCTCTATCAGAAATGGACAGATCCAGATCATGAAGAGA   |
| 32445_ | 000051  |    |       |      |   | TT                                                           |
| x1     | 6158.1  |    |       |      |   |                                                              |
| ex3_56 | CM000   | 14 | 0.009 | 28.2 | 1 | ATCTTTTTGTAGTTCATAAGCTTATGATGACGTAAGTGTGACGACATTGGGTTTTTAC   |
| 32719_ | 685.2/7 |    |       |      |   | GTTTCATGTGTGAGATGTGCCTCCCTCAAGCCTTATTACAATGCCAGTACATTTTTTTT  |
| x1     | 144064  |    |       |      |   | CCACATCTGATG                                                 |
|        | 4-      |    |       |      |   |                                                              |
|        | 714405  |    |       |      |   |                                                              |
|        | 17      |    |       |      |   |                                                              |
| ex3_56 | ENST0   | 14 | 0.008 | 28.2 | 1 | TTGTGGGTATAACATTCACTATATTAAGATCATGCATGTGCCCCAAACCTAATTCTTT   |
| 32950_ | 000051  |    |       |      |   | T                                                            |
| x1     | 6349.1  |    |       |      |   |                                                              |
| ex3_56 | ENST0   | 14 | 0.008 | 28.2 | 1 | GATCGATGATGAAAATAAGCAAGTTTGAGCATCAGAAGACCTTCCAGTCTACTTGATG   |
| 33117_ | 000036  |    |       |      |   | CA                                                           |
| x1     | 2361.1  |    |       |      |   |                                                              |
| ex3_56 | AC079   | 14 | 0.008 | 28.2 | 1 | GUUGAGGUCUAUCCCGAUAGGUCUUUUCUGUAGCCUGCACGUUGUUGGAAAUG        |
| 33832_ | 969.5/1 |    |       |      |   | CCUCAUAGAGUAACUCUGUGAUUUUACUUUACUUACAGGACUAUUGUUACAUCUG      |
| x1     | 16696-  |    |       |      |   | UGGGAAGGAACCAACAAGACAGUU                                     |
|        | 116565  |    |       |      |   |                                                              |
| ex3_56 | CM000   | 14 | 0.009 | 28.2 | 1 | AACCAATTGTGCCAGTGGGGCTATGGGTGGCCCTTTTCTCCTCAGTCAGGGCTGG      |
| 34785_ | 677.2/7 |    |       |      |   | AGGCCAAGATCAGCCTTTGAGGATTATCAGGGCTGCCACAAGCTGGGCAGCCTTGT     |
| x1     | 512166  |    |       |      |   | TTTCCTACCTCAGACATTT                                          |
|        | 6-      |    |       |      |   |                                                              |
|        | 751215  |    |       |      |   |                                                              |
|        | 36      |    |       |      |   |                                                              |
| ex3_56 | ENST0   | 15 | 0.002 | 30.2 | 1 | TCCTGGCTTTAATTTATATGCCTTTTTTCAAATTCTGACTGGTTGCATGATGAATAAAAT |
| 34821_ | 000062  |    |       |      |   | C                                                            |
| x1     | 5269.1  |    |       |      |   |                                                              |
| ex3_56 | CM000   | 14 | 0.009 | 28.2 | 1 | AAGACTATACTTTGAGGGATCATTCTATAGTTTGTACTGGAGAAGTTTCTCTGAATA    |
| 35606_ | 665.2/3 |    |       |      |   | TGTAGAGCACCACAAATCACGAGGAAAAGCGCAGCATTCTCTCCTGAGCATGAAGC     |
| x1     | 030453  |    |       |      |   | CAGTTTTCAGTGTTGCTTCGATGTAAGTGCCTTCTGCCCTTGATGATCATTCTTCTCT   |
|        | 6-      |    |       |      |   | CCTCCCTGGAGAGTAAGAGGGAGAGGAGGCAGTCTGAGTGGT                   |
|        | 303043  |    |       |      |   |                                                              |
|        | 21      |    |       |      |   |                                                              |
| ex3_56 | ENST0   | 19 | 2E-05 | 38.2 | 1 | AAGACTATACTTTGAGGGATCATTCTATAGTTCATTACTAGAGAAGTTTCTCTGAATG   |
| 35796_ | 000036  |    |       |      |   | G                                                            |

|                 |                                |    |       |      |   |                                                                                                                                     |  |
|-----------------|--------------------------------|----|-------|------|---|-------------------------------------------------------------------------------------------------------------------------------------|--|
| x1              | 2986.2                         |    |       |      |   |                                                                                                                                     |  |
| ex3_56_35887_x1 | AK096_147.1/2_233-2308         | 24 | 1E-08 | 48.1 | 1 | GCUGUACAUGAUGACAACUGGGCUCUACUGAACUGCCAUGAGGAAACUGCCAUGUCACCCUUCUGACUACAGC                                                           |  |
| ex3_56_35905_x1 | ENST0_000038_4442.1            | 15 | 0.002 | 30.2 | 1 | GGCTTGCTGGTGCTTACCACAGGCTGAATTCTTACACTGACTATATAGAAAAGGAGGTAG                                                                        |  |
| ex3_56_36645_x1 | ENST0_000040_8876.1            | 20 | 3E-06 | 40.1 | 1 | TGCCCAGTGATGACACCATCCTTGCTCCCCGTGCCCCCAGGGGCTATGGGCGACACCAT                                                                         |  |
| ex3_56_36980_x1 | CM000_666.2/1_118884           | 14 | 0.009 | 28.2 | 1 | TGTCCTTGGCCTGGGTAGAGTGGCACCTAGTTGGTGGTGCCCATATTAGCCAGGGACAAAGCAACCCTTTGTTTCATCCCAGCTTGGCTTTTGTATCTGTACCTATACCTGGTTCTGCCTTAGACACATGG |  |
|                 | -                              |    |       |      |   |                                                                                                                                     |  |
|                 | 1119013                        |    |       |      |   |                                                                                                                                     |  |
| ex3_56_37670_x1 | CM000_673.2/6_2854285-62854161 | 15 | 0.003 | 30.2 | 1 | CTCCAATGAGGAGGAAACATCCTGCCTTACCCCTGTTTTAGCCTGGGAACCAGTAATTGTGAACTCACCAGGGTTAACATGAAGAGGGCATGAGAGCTTATTCCATAAGGAATTGTCTGAGACAT       |  |
| ex3_56_37908_x1 | ENST0_000036_5080.1            | 32 | 3E-13 | 63.9 | 1 | TGGATCAATGATGAGTACCCTGGGGTGTCTGAATCTTGGATTTTGATTAAACCCTATAAC                                                                        |  |
| ex3_56_38053_x1 | ENST0_000051_6035.1            | 19 | 0.007 | 30.2 | 1 | TTTCTATTTTATCTGATTCTTCCTCTATGCACAACTCAGCTTCAGTCATTAGTATCATT                                                                         |  |
| ex3_56_38182_x1 | ADDF0_113389_94.1/3988-3917    | 14 | 0.009 | 28.2 | 1 | UGGGCAUGUGAUGUGACCUUCCUGAGCCUGCAUUCCUCACCUGGAAAUGAUGAGCAGUUACUGAUGCCACA                                                             |  |
| ex3_56_38337_x1 | CM000_685.2/2_0136135-20136066 | 33 | 8E-14 | 65.9 | 1 | GGGCAATGATGTAAAGGTTTTACGACTGACCTTTGTA ACTATGAAGTTTTCTACTTGACCTGAGCTCA                                                               |  |

|                        |                                                  |    |            |      |   |                                                                                                                                                                                                                        |
|------------------------|--------------------------------------------------|----|------------|------|---|------------------------------------------------------------------------------------------------------------------------------------------------------------------------------------------------------------------------|
| ex3_56<br>38690_<br>x1 | ENST0<br>000051<br>7184.1                        | 15 | 0.003      | 30.2 | 1 | TGGTTTAAAGCCAACCTCTGGGCTCCCATCAGAAGGAAGGAGATGAATGCTATGACCA<br>AAG                                                                                                                                                      |
| ex3_56<br>39905_<br>x1 | ENST0<br>000051<br>6792.1                        | 16 | 0.000<br>5 | 32.2 | 1 | GAGGAGGTCCATTTTAAAAAGAATAGATTGGAAATGCCTCATAGAGTAACTCTGTG<br>GTT                                                                                                                                                        |
| ex3_56<br>40134_<br>x1 | CM000<br>682.2/1<br>698303<br>3-<br>169828<br>31 | 14 | 0.009      | 28.2 | 1 | AAGATTATATTTTCAGGGATCATTCTATAGTTTGTCACTAGGGAAGTTCCTCTGAATG<br>TGTAGAGCACCAGAAACATGAGGAAGAGGCACAGGGTTCTCTCCTGAGTGTGAAGC<br>TGGCTCTTGGCGCTGCTTTCCTGCAACTGCTATTTGCCATTCGTGATTGTGGAGAGT<br>CAGAGGGAGAGGATGATGCAGTCTGAGTGGT |
| ex3_56<br>40464_<br>x1 | ENST0<br>000036<br>4977.1                        | 19 | 1E-05      | 38.2 | 1 | ACCACCAGTGATGAGTTGAATACTGCCCCAGTCTGATCAACATGCGTGAAAGATATT<br>TTC                                                                                                                                                       |
| ex3_56<br>41320_<br>x1 | CM000<br>682.2/3<br>844808<br>4-<br>384482<br>15 | 14 | 0.009      | 28.2 | 1 | GCCTGCATTTCGTAAGTGATCACGGGCTGCCCGTGTCTGCTCATTGGTAGTGCAGG<br>CAGAGGAAATGCGGGAAAGGTTGCTGTGTTTGGAGGGTCCACATCTTCACCCTCCT<br>GTCCCAGGAGCTTTCCTACA                                                                           |
| ex3_56<br>41715_<br>x1 | CM000<br>682.2/5<br>121539<br>-<br>512141<br>7   | 15 | 0.003      | 30.2 | 1 | GTTCCCTTTTAAGGCTGACCCAGTGCTTTAAGAGGCTGATACAGAAGGGTAAAGTTA<br>AGTCTCCACAAAATCCAGGGAAGAGACTGTGAAACTCATCTTAGAACCTTGTATGGA<br>GTCACAGCT                                                                                    |
| ex3_56<br>42085_<br>x1 | CM000<br>685.2/2<br>013638<br>5-<br>201363<br>06 | 23 | 4E-08      | 46.1 | 1 | GATCAATGATGAAACTAGCCAAATCTGAGCATCAGAAGGCTTTCGGTCTACCTGAT<br>GCATGATCTCTACAGTTCTGAGA                                                                                                                                    |
| ex3_56<br>42446_<br>x1 | AC034<br>186.5/1<br>19166-<br>119029             | 14 | 0.008      | 28.2 | 1 | GCUGUCCUGGACCUGCCAGCUGCACAGAUGCAGAUGCUCUGCUAUGCCUGUAAC<br>AUCGGGGCGAAGUGAAAGUGGCUAUUUCUACACUCAGUGUUCAGAAAACACUGAA<br>CAACAAGAAUGGAUAAUAGCCUGACAUUU                                                                     |
| ex3_56<br>42701_<br>x1 | ENST0<br>000051<br>7111.1                        | 14 | 0.008      | 28.2 | 1 | ATGCATCTATCTGACATGCCTGGAGCAGGTATTGTCTGCTGCTAAAGTTTCCACCAC<br>AGA                                                                                                                                                       |

|                        |                                                    |    |            |      |   |                                                                                                                                                                                         |
|------------------------|----------------------------------------------------|----|------------|------|---|-----------------------------------------------------------------------------------------------------------------------------------------------------------------------------------------|
| ex3_56<br>43282_<br>x1 | CM000<br>674.2/1<br>037210<br>44-<br>103720<br>942 | 14 | 0.009      | 28.2 | 1 | ATCCTTTTGTGGTTCATTAGCTTGATATTGGGTTTTACACTATTCTATGAGATGTGCC<br>TCCCTCAAACCTTGTTACAACATTGACACATTACCCTTCTGATG                                                                              |
| ex3_56<br>43384_<br>x1 | CM000<br>685.2/4<br>747560<br>9-<br>474757<br>80   | 14 | 0.009      | 28.2 | 1 | GGCCTCCTGGTGCTTACCACAGGCTGTGTTCTTACACTGACTGTATAGAAAAGAAG<br>TGGGCCTGCCTTCTCTGTTCTTGTACTGACTGTATAGAAAGAGAAGAGCTCCTACCC<br>TATATACACCTCTGCCCAGGCTCTAGTCCTGGTCTGAATTGTGAATGGAGGGACATG<br>G |
| ex3_56<br>43477_<br>x1 | ENST0<br>000038<br>4458.1                          | 15 | 0.006      | 30.2 | 1 | GGTCTCTCAGCTCTGCTTAACCACACGGGTCCAGTGTGTGCTTGGCGTGTTCAGG<br>GAG                                                                                                                          |
| ex3_56<br>44189_<br>x1 | AC005<br>995.3/2<br>6676-<br>26542                 | 33 | 8E-14      | 65.9 | 1 | GCAUGGGUUUGGAUUAUGACAGGCCCAUCCCCUGGACCUCUCAUAGUGCCCCA<br>UGCCAGAGCAAACUGUGGCCCCGAACCAUUGCCUGGCUUCUGUACCCGUGGGCC<br>ACUGGCACUGAAGAGGGUUACACAGUG                                          |
| ex3_56<br>45549_<br>x1 | CM000<br>663.2/1<br>930574<br>15-<br>193057<br>281 | 14 | 0.009      | 28.2 | 1 | TTGCATGTGGTAATGTCTGCTCTTCATTCTTTGGGAGCAGAAATACATCCATAACAC<br>GCTAAATTA AAAAAGGAGTTCTCAGGGCTGCCAACCTTACAGTAGAGGTTGAGTGGT<br>AGTATATTACTCCTACATAA                                         |
| ex3_56<br>45900_<br>x1 | ENST0<br>000036<br>3660.1                          | 17 | 0.000<br>1 | 34.2 | 1 | GGCAGATGATGTTTGTTCACGATGGTCTTCAGATGCCACGTGGGCACTGCTGAG<br>AAA                                                                                                                           |
| ex3_56<br>46734_<br>x1 | ENST0<br>000036<br>4079.1                          | 19 | 0.006      | 30.2 | 1 | GGGTCAATGATGAGAACCTGATATTGCCCTGAAGAGAGATGATGACTTAAAAATCAT<br>GTT                                                                                                                        |
| ex3_56<br>46981_<br>x1 | ENST0<br>000041<br>1292.1                          | 33 | 8E-14      | 65.9 | 1 | TGTGTGTTGGAGGATGAAAGTACGGAGTGATCCATCGGCTAAGTGTCTTGTACAAT<br>GCT                                                                                                                         |
| ex3_56<br>48029_<br>x1 | AJ6094<br>76.1/1-<br>135                           | 15 | 0.002      | 30.2 | 1 | CUUCCUCAGCCUACUCCAGGGACUUUUGUUGCCUGUAAAGUGCUCUGGCAUUG<br>CCUGAGGAUAGAUGAGAAAGCACAUUCCCUCCCAGUAAGACGCUGUUUUUUUU<br>UGGGGCCUACAAGUUGAGCUGACAGU                                            |
| ex3_56<br>48632_<br>x1 | CM000<br>663.2/1<br>116961                         | 16 | 0.001      | 32.2 | 1 | ATCCTTTTGTATACATTTATGCATGATGATTGGGTTTTTACCATCATATGTGGTGAGAT<br>GTGTCTCCCTCAAACCTTGTTATCACGTCAGCATGTGATCAGTCTGACA                                                                        |

|                        |                                      |    |            |      |   |                                                                                                                                                 |  |
|------------------------|--------------------------------------|----|------------|------|---|-------------------------------------------------------------------------------------------------------------------------------------------------|--|
|                        | 3-<br>111695<br>07                   |    |            |      |   |                                                                                                                                                 |  |
| ex3_56<br>48720_<br>x1 | ENST0<br>000036<br>5028.1            | 21 | 5E-07      | 42.1 | 1 | TTTAGAATGTCAA AATTGATTTTGT AATAGTCAGGACAGGATAAACAGTCGCTATATTA<br>A                                                                              |  |
| ex3_56<br>48826_<br>x1 | ENST0<br>000040<br>8175.1            | 20 | 0.000<br>5 | 32.2 | 1 | GGGGTGTGCTCAGAGCAGGGGGCCCGAAGAATGCCTCCTCTGTTTACAACACACCC<br>AATA                                                                                |  |
| ex3_56<br>49119_<br>x1 | CM000<br>663.2/1<br>565293           | 19 | 0.002      | 30.2 | 1 | ATACTTTTGTAGGTCATAAGCTGAGGATTGGGTTTTTCATGCTCTTGTGTGAGATATGC<br>TTCTCTCAAACCTTCTGACCTGGGCACATTACCCAGCTAATG                                       |  |
|                        | 30-<br>156529<br>429                 |    |            |      |   |                                                                                                                                                 |  |
| ex3_56<br>49345_<br>x1 | CM000<br>671.2/1<br>931069           | 14 | 0.009      | 28.2 | 1 | ATCTTCTTATAGTTGATAAGCGTTGATGATTGGATGTTCCACGCACATGTGTGAGATGT<br>GCCTCCTACAACCTTGATGTTGGCATATTACCTGTCTGATG                                        |  |
|                        | 1-<br>193107<br>88                   |    |            |      |   |                                                                                                                                                 |  |
| ex3_56<br>49364_<br>x1 | KZ208<br>915.1/6<br>242092           | 19 | 0.005      | 30.2 | 1 | AAGACTGTACTTTTCAGGGGTCATTTCTGTAGTTCATTAATATAGTTTTCTGAGCATGTA<br>GAGCACCAAAAAAAT                                                                 |  |
|                        | -<br>624201<br>9                     |    |            |      |   |                                                                                                                                                 |  |
| ex3_56<br>49857_<br>x1 | AC084<br>794.3/2<br>15294-<br>215169 | 14 | 0.008      | 28.2 | 1 | AGAUCAUUUCAAGAGGGGCUCGUGGGGCUAUGAAACCAUGAGCUCUUA AUGCUAU<br>GACCAAAGACUGAAGUUCUCUAUAGGACGCCAUAGCACUCA AUGGUGCUGUUUUC<br>CUGAGGAGACAUAGA         |  |
| ex3_56<br>49868_<br>x1 | CM000<br>667.2/4<br>065496           | 14 | 0.008      | 28.2 | 1 | ACGCAGGATTCAGACTAGAATATAGCTGTTAAGTGCTGTGTTGTCATTCTCCCTGCTT<br>AAAATAAAGTTTTTTTTCTTAAC TATACCTGTCTGCTATCTGCTGTAGCAGCCAGGGAT<br>GCTTGGTTTTCATACAT |  |
|                        | 3-<br>406550<br>94                   |    |            |      |   |                                                                                                                                                 |  |
| ex3_56<br>50130_<br>x1 | ENST0<br>000039<br>1306.1            | 14 | 0.008      | 28.2 | 1 | TGAAC TTTAAAATGCAAGTTCATAGTTCTTTAAGAGACTAACACAGAAAGCTAAAGTA<br>AT                                                                               |  |

|                        |                                                  |    |            |      |   |                                                                                                                |
|------------------------|--------------------------------------------------|----|------------|------|---|----------------------------------------------------------------------------------------------------------------|
| ex3_56<br>50258_<br>x1 | CM000<br>668.2/1<br>614844<br>5-<br>161483<br>65 | 18 | 7E-05      | 36.2 | 1 | AAGACTATACTCTCAAGGATCATTTCTATAGTTTGTTACTAAAGAAGTTTCTCTGAATT<br>TGTAGAGCACCGAAATTATTA                           |
| ex3_56<br>50549_<br>x1 | CM000<br>666.2/5<br>412320<br>4-<br>541231<br>00 | 14 | 0.009      | 28.2 | 1 | ATCTTTTTTGTAGTTCATAAATGCGATGATTGGGTTTTTCATGTTTATGTGTGAGATGTG<br>CTTCCCTCAAACCTTGTTATGATGTCAGTACGTTATCCATCTGATG |
| ex3_56<br>50700_<br>x1 | ENST0<br>000039<br>1093.1                        | 15 | 0.004      | 30.2 | 1 | TTTACAAGGGAAAAGCAACCCCATTA AAAAGTGGGCAAAGTAAGGTCTTTGGGGAAC<br>AGG                                              |
| ex3_56<br>50794_<br>x1 | ENST0<br>000036<br>3424.1                        | 16 | 0.001      | 32.2 | 1 | TTCCAAAGAATTGAGTTCAGTTC AAGGCAGCTTCCCTGTTCTGTTAACGAACTTTGG<br>GA                                               |
| ex3_56<br>51079_<br>x1 | ENST0<br>000036<br>4514.1                        | 18 | 0.009      | 28.2 | 1 | AGGCAACTCTTAGAAGATGGATAGCTTCTCTTTTGCTGTGGGTGTGGCCACAAAACG<br>TTT                                               |
| ex3_56<br>51623_<br>x1 | ENST0<br>000036<br>3552.1                        | 14 | 0.008      | 28.2 | 1 | GGTCAATGATGTAATGGCATGTATTAGCTGAATCCAAAGTTGAAGTGAATTCTAAAAT<br>TA                                               |
| ex3_56<br>52164_<br>x1 | CM000<br>679.2/4<br>281844<br>-<br>428176<br>9   | 14 | 0.008      | 28.2 | 1 | AAGACTATCCTTTCAGGGATCATTTCTATAGTTTGTTACTATAGAAGTTTTCTGAAGGT<br>GTAGAGCACCAAAGGAT                               |
| ex3_56<br>52305_<br>x1 | ENST0<br>000045<br>8802.1                        | 15 | 0.002      | 30.2 | 1 | AGTTTTCTGTGGTTCATAAGCATGATGATTGGGTTTTTCATGCTTATGTGTGAGATGTG<br>CC                                              |
| ex3_56<br>52832_<br>x1 | ENST0<br>000036<br>2582.1                        | 16 | 0.000<br>5 | 32.2 | 1 | TCTTGTATCCAAAAGTGATCATGGGTTGCCTGTGTCCCGATCATTAAACAGTGCAGGG<br>GTA                                              |
| ex3_56<br>52880_<br>x1 | AF250<br>841.1/1<br>-91                          | 37 | 4E-16      | 73.8 | 1 | GAUCGAUGAUGACUCCAUAUAUACAUUCCUUGGAAAGCUGAACAAAAUGAGUGA<br>AAACUCUAUACUGUCAUCCUCGUCGAACUGAGGUCC                 |
| ex3_56                 | ENST0                                            | 21 | 5E-07      | 42.1 | 1 | TGTGAGAGTGATGAGTTGCACACTGGTGGAGCCATGGTATCAGGTGATACAGGCAC                                                       |

|        |              |    |       |      |   |                                                             |
|--------|--------------|----|-------|------|---|-------------------------------------------------------------|
| 52933_ | 000039       |    |       |      |   | CACT                                                        |
| x1     | 0833.1       |    |       |      |   |                                                             |
| ex3_56 | AC006        | 15 | 0.002 | 30.2 | 1 | GCAGACUCACUCUGCAUCUGACUAUACUUCAGGCGGGUGCUUUUUCUGUCUGC       |
| 53218_ | 549.28/      |    |       |      |   | CAGAUAAACAUUCAGGGUGCUGUGGCCGCCUCACGUAUCCAGAGUGAUGCAGCU      |
| x1     | 5389-5513    |    |       |      |   | CCCUGGGGACACAGGU                                            |
| ex3_56 | ENST0        | 15 | 0.003 | 30.2 | 1 | GGATCGATGATGACTTAAAGATTTATCTAATTTAAATCTGAACAAAATGAGTGACCAA  |
| 53231_ | 000051       |    |       |      |   | AA                                                          |
| x1     | 6087.1       |    |       |      |   |                                                             |
| ex3_56 | CM000        | 17 | 0.000 | 34.2 | 1 | AAGACTATACTCTCAGGAATCATTCTATAGTTTTTACTAGAGAAATTTCTCTGAACG   |
| 53742_ | 670.2/9      |    | 1     |      |   | TGTAGAGCACTGGAAACCGTGAGGAGAAGCTGCCTTCTCTTCTGAGCATGAAGTGA    |
| x1     | 735826       |    |       |      |   | GCTCTCAGTGTGCTTCTCTGCAACTGCCATTTGCCATTGATGATCGTTCTTCTCTTC   |
|        | 5-97358478   |    |       |      |   | CTCTGGGAGAGTAAAAGGGTACAGGATGCAGTCTGAGTAAT                   |
| ex3_56 | CM000        | 15 | 0.004 | 30.2 | 1 | ATCCTTCTGTAGTTCACAAGCATGATGATTGGGTTTTTACACTTACATGAGATGTGCC  |
| 54322_ | 664.2/4      |    |       |      |   | TCCCCTCAGCCTTGTTACTACATTATCCACCTGATA                        |
| x1     | 423966       |    |       |      |   |                                                             |
|        | 1-44239568   |    |       |      |   |                                                             |
| ex3_56 | CM000        | 15 | 0.003 | 30.2 | 1 | GGTCAAAATGTGTTGACATGTATTACCTGAATTTATTGCTGATGTATAATAACACTTCA |
| 54883_ | 663.2/2      |    |       |      |   | ACTCTAAAATAATATAGCTTTTTGG                                   |
| x1     | 173074       |    |       |      |   |                                                             |
|        | 71-217307389 |    |       |      |   |                                                             |
| ex3_56 | ENST0        | 22 | 4E-07 | 44.1 | 1 | GTGTTCAATGATGATTTCTATTTGTTTGCCTGATTTCTTTTGGATAATGAAGGCATCT  |
| 54895_ | 000045       |    |       |      |   | T                                                           |
| x1     | 9124.2       |    |       |      |   |                                                             |
| ex3_56 | ENST0        | 20 | 0.001 | 32.2 | 1 | CATATCTATTTGACAGACCTGGAGCAGTTACTGTCTGCTGCTAAGGTTTCCACTACAG  |
| 54979_ | 000051       |    |       |      |   | AT                                                          |
| x1     | 6771.1       |    |       |      |   |                                                             |
| ex3_56 | CM000        | 15 | 0.005 | 30.2 | 1 | GTCCTTTTATAGTTGATGAGCATGATGATTGGGTGTTACACGCATGTGTGAAATGTC   |
| 56654_ | 667.2/6      |    |       |      |   | CCACCCTCAAATCTTGTTACAATATTGGCACATTACCCATCTGACA              |
| x1     | 953926       |    |       |      |   |                                                             |
|        | 4-69539161   |    |       |      |   |                                                             |
| ex3_56 | CM000        | 28 | 6E-11 | 56   | 1 | ATCCTTTTGTAGTTCATGAGTGTGATGATTGTGTGTTTCATACGCTTGTGTGAGATGTG |

|                 |                                                    |    |            |      |   |                                                                                                                                                                                                 |
|-----------------|----------------------------------------------------|----|------------|------|---|-------------------------------------------------------------------------------------------------------------------------------------------------------------------------------------------------|
| 57671_x1        | 665.2/4<br>725062<br>6-<br>472505<br>23            |    |            |      |   | CCACCCTTGAACCTTGTTACGACATTGGCACATTACCCGTCTGATC                                                                                                                                                  |
| ex3_56_58211_x1 | CM000<br>670.2/7<br>589290<br>4-<br>758928<br>00   | 15 | 0.003      | 30.2 | 1 | ATCCTCTTGCAGTTCATAAGCATGATGATTGGGTTTTTCACACTCCTGTGTGAAATGTA<br>CCTTCCTCAAACCTTTTTATAACATCAGCACATTACCGAACATGAAA                                                                                  |
| ex3_56_58270_x1 | AC073<br>210.8/1<br>34490-<br>134624               | 26 | 8E-10      | 52   | 1 | GCAUGGCUGAAUACUGUGUUCUUUUUAUCAGUAGUUUACACAGCCAGACACCAUGC<br>AAAAGCAGUCUJCCCUIIUAGAAUGACUGAUGGUAUGCUAAGGUUUUUCAUAGCAU<br>AUCAUUUUAAAGGUGAAUACAAAU                                                |
| ex3_56_58426_x1 | ENST0<br>000036<br>3418.1                          | 14 | 0.008      | 28.2 | 1 | TTTGAGGTCTTTCCCGATGGGACTTTTTCTGTAGGCTGCACATCATTGGAAACGCCTC<br>ATA                                                                                                                               |
| ex3_56_58550_x1 | CM000<br>666.2/1<br>831769<br>40-<br>183176<br>760 | 14 | 0.009      | 28.2 | 1 | AAGTCACGCTTAGCTTCTGCAAGTATTTGTTTTGCAGTATTGAAAACTCCTCCATGA<br>GGAGGGCACAGCGTTCTGCCTGGAGTGTGAGGCCGGTGTGCTTGGCTGCAGCTG<br>CCATTTGCCACTGATGATCATTCTTCTCTTCCCCTGTGAGAGTAAGGAGAGGATGCA<br>GTCTGAGTGGT |
| ex3_56_59086_x1 | CM000<br>685.2/8<br>085720<br>2-<br>808570<br>76   | 16 | 0.000<br>6 | 32.2 | 1 | ATTGGTTGAATATCACCCCTGGCTTTGGCCATGGCCATGGGAGAGATTTGGCACCCA<br>GAGCCTCCAGGGGCCTCAGCTCAATGTGCACTGCCCCATGTGCAGCTGTGAAACCC<br>AGGCCCTGATGGGC                                                         |
| ex3_56_59179_x1 | ENST0<br>000051<br>6395.1                          | 19 | 0.002      | 30.2 | 1 | ATGACCTGTGAAACCAAGGGCTCCTAATGCTATGACCAAAGACTGAAGCTCTCTATG<br>AGA                                                                                                                                |
| ex3_56_59207_x1 | ENST0<br>000045<br>8762.1                          | 15 | 0.006      | 30.2 | 1 | TGATGAATTGATGACAGTCATCTTTTGAGAGTGACCCAAAATGAAAAGAATACTCATT<br>GC                                                                                                                                |
| ex3_56_59842_x1 | ENST0<br>000041<br>1362.1                          | 14 | 0.008      | 28.2 | 1 | GCCAAATGATGCTTATTTGACTCTGGTGCCTTCAGTGTAAGGATGATTTATAATCTG<br>TC                                                                                                                                 |
| ex3_56          | ENST0                                              | 19 | 0.004      | 30.2 | 1 | TGTCAAAAATTCCCAATCCTATTTCTGACACTTCATATGAAAGCTGCATGTGCAGTC                                                                                                                                       |

|        |         |    |       |      |   |                                                              |
|--------|---------|----|-------|------|---|--------------------------------------------------------------|
| 60957_ | 000051  |    |       |      |   | TT                                                           |
| x1     | 6883.1  |    |       |      |   |                                                              |
| ex3_56 | ENST0   | 36 | 1E-15 | 71.9 | 1 | GCATGGGTTTGGATTATGACAGGCCCATCCCCCTGGACCTCTCATAGTGCCCCATGC    |
| 61076_ | 000038  |    |       |      |   | CAG                                                          |
| x1     | 4488.1  |    |       |      |   |                                                              |
| ex3_56 | CM000   | 15 | 0.005 | 30.2 | 1 | ATTCTTTTATAGTTTATAAGTGTGATGATTGAGTTTTTCATGCTCAGGCATGAGATGTGT |
| 61566_ | 679.2/1 |    |       |      |   | CACCTCAAACCTTGCTAAACATCAGCACAAAGACCAGACG                     |
| x1     | 814655  |    |       |      |   |                                                              |
|        | 2-      |    |       |      |   |                                                              |
|        | 181466  |    |       |      |   |                                                              |
|        | 51      |    |       |      |   |                                                              |
| ex3_56 | AL132   | 37 | 4E-16 | 73.8 | 1 | UGGAUCGAUGAUGACUACUGGUGGCGUAUGAGUCUUUUGCGAUGAAUACGUGUC       |
| 61933_ | 709.5/1 |    |       |      |   | UAGAACUCUGAGGUCCGU                                           |
| x1     | 35542-  |    |       |      |   |                                                              |
|        | 135471  |    |       |      |   |                                                              |
| ex3_56 | ENST0   | 14 | 0.008 | 28.2 | 1 | CTCCATGTGTCTTTGGAACCTGTCAGCTGTGGCAGTTGCCCTTCCTAGCCATGGAAG    |
| 63520_ | 000038  |    |       |      |   | AGT                                                          |
| x1     | 4401.1  |    |       |      |   |                                                              |
| ex3_56 | ENST0   | 25 | 3E-09 | 50.1 | 1 | AAGAAATGAAGAACTAAAATTGGTCTTAGTATTGAAGTGAAGACACTGAGATCCAAC    |
| 64048_ | 000041  |    |       |      |   | TC                                                           |
| x1     | 0413.1  |    |       |      |   |                                                              |
| ex3_56 | AC068   | 15 | 0.004 | 30.2 | 1 | AUAGUCUGUGGAAAGGCUACUGUGUUGUUGAACUUGCCCAGCUGUGGGUGCAGC       |
| 64763_ | 544.7/1 |    |       |      |   | CAUGUACCAGGCAGCCCAAGCCUGACAUAAGUAAAUUCCCAGGAGAAGUCUUUC       |
| x1     | 02252-  |    |       |      |   | CUGGGUUUUGAAUUUGCAGUAACAGGUGUAAGCAUUCAGCAGCAGUUUGUUGAU       |
|        | 102068  |    |       |      |   | CAUGUGAUAUUCAGAAAUGCAA                                       |
| ex3_56 | CM000   | 15 | 0.004 | 30.2 | 1 | GACCTCTCTCATAGGGCTGTAGGGGATCTTTTTTCTCTTCAGCCAGGGTTGGAGG      |
| 65899_ | 673.2/8 |    |       |      |   | CCAAGATGGCCCTTGAGAATCATCATCATGACTGCTGAGAGCTGGGCAGCCTTGTTT    |
| x1     | 555016  |    |       |      |   | ACCTCCCTTGGGCATTT                                            |
|        | -       |    |       |      |   |                                                              |
|        | 855514  |    |       |      |   |                                                              |
|        | 6       |    |       |      |   |                                                              |
| ex3_56 | AL121   | 18 | 0.009 | 28.2 | 1 | GGGGUGUGCUCAGAGCAGGGGGCCCGAAGAAUGCCUCCUCUGUUUACAACACAC       |
| 66123_ | 784.5/1 |    |       |      |   | CAAUAGGAAUCUGGGGUCAUUGUGACAAGGGACACAGAGCUUGUGACCUCUCCUA      |
| x1     | 00385-  |    |       |      |   | CAAACAAUUGCCCUACACAU                                         |
|        | 100257  |    |       |      |   |                                                              |
| ex3_56 | CM000   | 14 | 0.009 | 28.2 | 1 | ATAAACAAAAGAACACCAATTGTGCTCCTTTCCTCCTGGGGCCCAGTGTGCAATGGC    |
| 66952_ | 665.2/1 |    |       |      |   | TGCAAACAGCTGCCTCCTTGGTAGTATACATGGCCTGTTGCTTGTATGGGTTGGCCT    |
| x1     | 085745  |    |       |      |   | AAGAAACCTGAGAGACAGCC                                         |
|        | 65-     |    |       |      |   |                                                              |
|        | 108574  |    |       |      |   |                                                              |

|                        |                                                         |    |            |      |   |                                                                                                                                               |
|------------------------|---------------------------------------------------------|----|------------|------|---|-----------------------------------------------------------------------------------------------------------------------------------------------|
| ex3_56<br>67440_<br>x1 | 698<br>CM000<br>666.2/8<br>776858<br>1-<br>877684<br>85 | 14 | 0.009      | 28.2 | 1 | ATCCTTTTGTGGTTTGTAAAGAATGATGACTGTGTTTTACTCAAGATGTGCCTTTCTC<br>AAACCTTATTACCATGTTGGCACATTACCTGTCTGATG                                          |
| ex3_56<br>67448_<br>x1 | ENST0<br>000051<br>6873.1                               | 14 | 0.008      | 28.2 | 1 | ACTCACTGATGAGTAGCTTCTGACTTTCATTCTGAGTTTGCTGAACCCAGATGCCATT<br>CC                                                                              |
| ex3_56<br>67515_<br>x1 | AC009<br>967.8/2<br>6053-<br>26184                      | 14 | 0.009      | 28.2 | 1 | GGCUUCCUAGUACUUAACCAUGGUCUGUGUUUCUACGCUGACUGUAUAGAAACAGG<br>AGGCAGAGUAAACCGACCCCACAUAUACCUCAGCCCAGGCCUGUGCUGCGUCUG<br>UAUUGUGAAUCAGGAGACAUGG  |
| ex3_56<br>68452_<br>x1 | ENST0<br>000051<br>6629.1                               | 15 | 0.002      | 30.2 | 1 | GAGCAGTTTGGCATATGTTCTGAATCTGAGGTTGATTATTATTCCTTTAGCGCTAGTA<br>TT                                                                              |
| ex3_56<br>69346_<br>x1 | CM000<br>667.2/5<br>600062<br>1-<br>560005<br>18        | 16 | 0.000<br>7 | 32.2 | 1 | ATTCTTTTGTAGTTTATAAGCCTGATGATTGGGTTTTTCATGTGCATGTGTGAGATGTG<br>CCTCCCGCAAACCTTGTTACGACGTTGGCACATTACCCATCTGATG                                 |
| ex3_56<br>70017_<br>x1 | CM000<br>666.2/7<br>355923<br>4-<br>735593<br>11        | 14 | 0.008      | 28.2 | 1 | AAGAGTATACTTTCAGGGATCATTCTATAGTTTGTTATTAATAGGTGGCTGCTAAAAT<br>GTAGAAACCATTAATAGT                                                              |
| ex3_56<br>70080_<br>x1 | CM000<br>674.2/6<br>265117<br>5-<br>626512<br>78        | 14 | 0.009      | 28.2 | 1 | ATCCTTTTGTAGTTCATAAGCTTGATGTTTGAGTTTTACACTTACGTGTGAAATGTGC<br>CTCCCTAAACCTTGTTACTACGTCAGCACATTACCCATGAGACA                                    |
| ex3_56<br>70281_<br>x1 | CM000<br>675.2/7<br>258668<br>0-<br>725868              | 14 | 0.009      | 28.2 | 1 | TGGCAAGCCTCCAGCGTGCGTGGGTCTGTGGTGATGTGTGCATTCCCTACACTGCTT<br>GCCAGAACAGTATTGAAATAGTGGAGCGTTTTGTCTGCTCCATCCAGAGCAAGGTTA<br>TAGAAATTTTCAGACAATT |

|                        |                                                        |    |            |      |   |                                                                                                                                                                                                                                |
|------------------------|--------------------------------------------------------|----|------------|------|---|--------------------------------------------------------------------------------------------------------------------------------------------------------------------------------------------------------------------------------|
| ex3_56<br>70353_<br>x1 | 10<br>CM000<br>669.2/5<br>610065<br>9-<br>561007<br>52 | 14 | 0.008      | 28.2 | 1 | ATCCTTTTGTAGTTAAGTGTGATGACAGGGTTTTTCACACTCATGAAGTGTGCCTCCCT<br>CAAAACTGGTTGCATTGACACACTACCCATCTGACA                                                                                                                            |
| ex3_56<br>70476_<br>x1 | CM000<br>673.2/3<br>208176<br>4-<br>320819<br>73       | 15 | 0.002      | 30.2 | 1 | AAGACTATACTTTTCAGGGATCATTCTATAGTTCATTACTAAAGAAGTCTATCTGAACA<br>TGTAGAACACATGACACCATAAGGAGGAGGCACAACATTCTCCCTAGAGCCTGAAGC<br>TGGCTCTTGGTGTTCATGACTACAGCAGCCATTTGCCACTGATGACTGTTCTCTTCC<br>AGGAGAATAAGAAGGAGAAGATGCAGTTTTGGGTTGT |
| ex3_56<br>70971_<br>x1 | CM000<br>676.2/4<br>159446<br>2-<br>415945<br>91       | 15 | 0.004      | 30.2 | 1 | TTTATTTATCTGACAGACCTGCAGCAGTTACTGGATGCTGTTAAAGTTTCCACTACAG<br>ATGCAAGAAAAGTGTCCACACTTTCTGTCTGTCTGATTGTGACAGCTAAGATTAAT<br>CAGGTAGGACAGTA                                                                                       |
| ex3_56<br>71061_<br>x1 | CM000<br>673.2/4<br>675887<br>3-<br>467587<br>66       | 14 | 0.009      | 28.2 | 1 | TATAAATGTGATGAATTGCACACTCGCAGAGTCATAGCATTAGGGGATGCAGGCAGT<br>GTTTCATACTTTCCCGAGGAAAGAAATGCACAGGTGCCACTCAGTCATCAC                                                                                                               |
| ex3_56<br>71243_<br>x1 | CM000<br>663.2/2<br>263042<br>62-<br>226304<br>363     | 15 | 0.006      | 30.2 | 1 | ACCCTTCTTAGTTCATAAGCATGATGATTGGGTTTTTCATACTCATGTGTGAGATGTGT<br>CTCTCTCAAACCTTTGTGAAAAGTCAGCACATGACCCATCTGATG                                                                                                                   |
| ex3_56<br>71539_<br>x1 | ENST0<br>000051<br>7180.1                              | 15 | 0.004      | 30.2 | 1 | TTGCAGATGCAAGAAAAAAGTGTCCCTCATGCTTTCTTTCTGATGGTGGCAGCTGAGA<br>CTG                                                                                                                                                              |
| ex3_56<br>71644_<br>x1 | CM000<br>665.2/9<br>887218<br>0-<br>988720<br>83       | 16 | 0.000<br>6 | 32.2 | 1 | AAGACTATACTTTTCAGAGATCACTTCTGTAGTTTATTATTAGAAAAGTTTCTCTGAATGT<br>GTAGAACAAGTGGAAAAAATGATCTAAGACTACTGTGAAT                                                                                                                      |

|                        |                                                    |    |            |      |   |                                                                                                                                                                                                                                   |
|------------------------|----------------------------------------------------|----|------------|------|---|-----------------------------------------------------------------------------------------------------------------------------------------------------------------------------------------------------------------------------------|
| ex3_56<br>71648_<br>x1 | CM000<br>665.2/1<br>729752<br>42-<br>172975<br>142 | 16 | 0.000<br>8 | 32.2 | 1 | ACCATGTTGTGGTTCACAAGCATGATAACTCTGTTTTTACGCTCACATGTGAGACATG<br>CCTCCTTCCAATCTTGTTATGTCAGCACATTATCCATCTGATG                                                                                                                         |
| ex3_56<br>72498_<br>x1 | CM000<br>664.2/1<br>045327<br>73-<br>104532<br>985 | 14 | 0.009      | 28.2 | 1 | AAGACTATTCTTCTAGGGATCTTTTCTATAGTTCAGTACCAGAGATGGTTCTCTGACA<br>GTGTGGAGCACCAGAAACCATGAGAAGGAGGCACAGCAATCTCTCCTGAGCATGGA<br>GCCTGCTCTTGGTGTTGTTTTGCTGCAGCTGCTGTTTGCCATTGATGATCGTTCTCTT<br>CTTTCAGGAGAGTAAGAAGGCGAGGATGCAGTCTGAGTGGT |
| ex3_56<br>73688_<br>x1 | CM000<br>669.2/1<br>368411<br>96-<br>136841<br>093 | 15 | 0.003      | 30.2 | 1 | ATCATTTTGCAGCTTATACATGTGATGACTGGGTTTTTTAACTCATAAGTGAGATGTG<br>CCTTTCTTACATCTTATTATGACATTAGTACATTACCCATTTGATA                                                                                                                      |
| ex3_56<br>74144_<br>x1 | CM000<br>668.2/3<br>820727<br>4-<br>382073<br>45   | 15 | 0.004      | 30.2 | 1 | GGTCAATGATGTAATGGCATGTATTAGCTGAATCCAGAGTTGATATGAGTTCTAAAAT<br>TACACTGAAGCTGG                                                                                                                                                      |
| ex3_56<br>74161_<br>x1 | CM000<br>663.2/3<br>531027<br>4-<br>353104<br>25   | 15 | 0.004      | 30.2 | 1 | AAGGCAGCATTGTTGTAGATGATTTGAAAGATTTTAAAAGGTATAAGCTCACAAAGTGT<br>AGGTAGTGTGCTACATGAGGGGCAAGTTTTTCACTAATATTACAAGGGTCTCTGATC<br>CAGTGAGTGGAGTTTGATAGTAATTTTTGATACAAGT                                                                 |
| ex3_56<br>74217_<br>x1 | CM000<br>670.2/7<br>181562<br>5-<br>718154<br>94   | 14 | 0.009      | 28.2 | 1 | TCCACAGGTGAGATCATCCTTACCTGTTCTTCTTTTGGAGGGCAGAGTTCACGATG<br>ACTAGAGTTTACATGATATGTGATTAATTCTCTGCATAATCAGGATTTGCAACATTCTG<br>TTTGCTCCTACCTGAT                                                                                       |
| ex3_56<br>74371_<br>x1 | BC036<br>582.1/1<br>156-<br>1210                   | 18 | 5E-05      | 36.2 | 1 | GGGGUGAUGAAGGCCUGCACCUGGUCCCCUCCCCAACUCUGCUCUGCUCCUGAA<br>G                                                                                                                                                                       |

|                        |                                                    |    |       |      |   |                                                                                                                                                                                                                                 |
|------------------------|----------------------------------------------------|----|-------|------|---|---------------------------------------------------------------------------------------------------------------------------------------------------------------------------------------------------------------------------------|
| ex3_56<br>74630_<br>x1 | CM000<br>680.2/3<br>025567<br>-<br>302543<br>4     | 14 | 0.009 | 28.2 | 1 | ATCCCATCTCTTAAATAAAAAGATTTTTTTTTTTAAGAAGTTGTACATGTGCAATGGCTG<br>CAAACAGCAGCTTCCTTGGCAGTGTGTGCAGCCTGTTTCTTGTATGGGTTGCTCTAA<br>GGGACCTTGGAGACAGGC                                                                                 |
| ex3_56<br>76479_<br>x1 | ENST0<br>000036<br>3791.1                          | 22 | 7E-05 | 36.2 | 1 | AGGTTGATGATGACTTACATATATACGTTTTTTTTTTTTTTTTTTGGAAAGGTGAACAAAA<br>T                                                                                                                                                              |
| ex3_56<br>76933_<br>x1 | ENST0<br>000036<br>5519.1                          | 14 | 0.008 | 28.2 | 1 | TAGAAGCCAATTAAGCCAAGTGGTGTGCCATGG<br>CTG                                                                                                                                                                                        |
| ex3_56<br>77417_<br>x1 | ENST0<br>000038<br>4533.1                          | 15 | 0.003 | 30.2 | 1 | GGATCGATGATGACTTTTCATACATGCATTCCTTGGAAAGCTGAACAAAATGAGTGAAA<br>AC                                                                                                                                                               |
| ex3_56<br>77735_<br>x1 | CM000<br>664.2/8<br>634719<br>5-<br>863470<br>62   | 25 | 7E-07 | 42.1 | 1 | TCATCAGGTGGGATAATTCTTACCTGTTTCTCCTTTTGGAGGGCAGGAAGAATAGGC<br>TGATTGGAGATGCATGAAATGTGGTTAATGTCTCTGCGTAATCAGGACTTGCAACAC<br>CCCGATTACTCCTTTCTGAT                                                                                  |
| ex3_56<br>77790_<br>x1 | CM000<br>669.2/1<br>381761<br>54-<br>138176<br>282 | 15 | 0.002 | 30.2 | 1 | ATCTTTTTGTAATTCCTAAGCATGATGGTTGATTCGGCTCTCACACTTGATGATTGGG<br>CTTTCACCTGGATCTGTGAGATGTGCCTCCCTCAACCCTTCTGCGAAGTCAGCACA<br>TTACCTGACAGAAA                                                                                        |
| ex3_56<br>77873_<br>x1 | CM000<br>685.2/7<br>272633<br>7-<br>727261<br>22   | 15 | 0.008 | 30.2 | 1 | AGGGCTATACTTTCAGGGGTAATTTCTATAGTTCATTAAGTGTGTTCTCTGAAT<br>GTGTAGGGTGCCAGAAACCACAAGGAGGAGGCACAGCATTCTCTAGTGAGTGTGAA<br>GCCGGCTGTTGGTGTGCTTCGCTGAAACTGCCATTTGCCACTGATAATCGTTCCTC<br>TTTTCCATCAGGAGACTAAGAGGTAGAAAACGCAGTCTGAGTGGT |
| ex3_56<br>78039_<br>x1 | ENST0<br>000036<br>4166.1                          | 21 | 1E-06 | 42.1 | 1 | TGGACTGTTGATGACAAGTGGTGGCTTATGTGGTTGTACATGCTGGTTGTATATGAA<br>GAA                                                                                                                                                                |
| ex3_56<br>78304_<br>x1 | CM000<br>671.2/6<br>235828<br>5-                   | 15 | 0.004 | 30.2 | 1 | CTACAATCAATTAAGCCACATGGGGCCTGGTGTGCAAGGGCTGCAAACAGCATCATC<br>CTAGGTAGTGTACAGCAGCCTGTTCCCTTGCGTACAACA                                                                                                                            |

|        |         |    |       |      |   |                                                               |  |
|--------|---------|----|-------|------|---|---------------------------------------------------------------|--|
|        | 623581  |    |       |      |   |                                                               |  |
|        | 91      |    |       |      |   |                                                               |  |
| ex3_56 | CM000   | 14 | 0.009 | 28.2 | 1 | TTGTCCTGGCCTATGCTTTTTCTACTCCCCTCTGCTTTTTTGGTCCCCCTGTGCTCAG    |  |
| 80225_ | 673.2/1 |    |       |      |   | TTCTAACAAGGTAGTCTGGCAGGACACACAGCAGTCTCCTTCAGTTTAGGAGGACTG     |  |
| x1     | 172637  |    |       |      |   | TCTTTAGAATAGAGCTGTCCCAAGGCACAAGATTACAAT                       |  |
|        | 99-     |    |       |      |   |                                                               |  |
|        | 117263  |    |       |      |   |                                                               |  |
|        | 952     |    |       |      |   |                                                               |  |
| ex3_56 | ENST0   | 14 | 0.009 | 28.2 | 1 | GCTGTCCTGGACCTGCCAGCACACAGACACAGTTGCTCCTGCGTGCCTGTAACAC       |  |
| 80949_ | 000051  |    |       |      |   | CGGG                                                          |  |
| x1     | 7240.1  |    |       |      |   |                                                               |  |
| ex3_56 | CM000   | 15 | 0.004 | 30.2 | 1 | AAGACTATACTTTTCAGGGATCATTCTATAGTTCATTACTAGAGAAGTTTCTCTGAAG    |  |
| 81249_ | 684.2/2 |    |       |      |   | GTGTAGAGCACCCCTC                                              |  |
| x1     | 094664  |    |       |      |   |                                                               |  |
|        | 5-      |    |       |      |   |                                                               |  |
|        | 209467  |    |       |      |   |                                                               |  |
|        | 18      |    |       |      |   |                                                               |  |
| ex3_56 | CM000   | 17 | 0.000 | 34.2 | 1 | AATCAATGATGAAACCTATCCCAAAGCTGATGACCTGAAGAAAATACGTACAGATTC     |  |
| 82184_ | 674.2/1 |    | 2     |      |   | AGCTTCTGAGAT                                                  |  |
| x1     | 104964  |    |       |      |   |                                                               |  |
|        | 21-     |    |       |      |   |                                                               |  |
|        | 110496  |    |       |      |   |                                                               |  |
|        | 352     |    |       |      |   |                                                               |  |
| ex3_56 | CM000   | 15 | 0.002 | 30.2 | 1 | AAGACTTTACTTTTCAGGGGTCATTTCTATAGTTTGTTTCAGAAGTTTCTCTGAATGTGTA |  |
| 82546_ | 669.2/9 |    |       |      |   | GAGCAAAAAGT                                                   |  |
| x1     | 838982  |    |       |      |   |                                                               |  |
|        | 4-      |    |       |      |   |                                                               |  |
|        | 983897  |    |       |      |   |                                                               |  |
|        | 55      |    |       |      |   |                                                               |  |
| ex3_56 | CM000   | 15 | 0.004 | 30.2 | 1 | ATTATTTTGTGGTTCATAAATGTGAAACACACTTACAGTTTTTCATGCTCATGTGTGAG   |  |
| 82644_ | 663.2/2 |    |       |      |   | ATATCCATCCTTTAAACCTTGTTACAATGTTGGCACATTACCTGTCCGATA           |  |
| x1     | 308955  |    |       |      |   |                                                               |  |
|        | 41-     |    |       |      |   |                                                               |  |
|        | 230895  |    |       |      |   |                                                               |  |
|        | 432     |    |       |      |   |                                                               |  |
| ex3_56 | CM000   | 15 | 0.003 | 30.2 | 1 | AAGACTATACTTTTCAGGGATCATTCTATAGCTCATTACTAGAGAAGTTCCCCTGAAC    |  |
| 83093_ | 667.2/3 |    |       |      |   | GTGTAGAACACTGGCAACCATGAGGAGGACATGCAGTGTTCTGTCCTGAGTGTGAA      |  |
| x1     | 542906  |    |       |      |   | GCTGGGTCTTGGTGTTGCTTTGCTGCAAGTACCATTTGCCACTGATGATTGTTTTTGT    |  |
|        | 4-      |    |       |      |   | CTCCCTCTGGGACAGTAAGGGAAAGGACACAGTCTGAGTGAT                    |  |
|        | 354292  |    |       |      |   |                                                               |  |

| Accession       | Gene                           | Length | Score | GC   | GC3 | GC4 | Sequence                                                                                                                                                                                                                |
|-----------------|--------------------------------|--------|-------|------|-----|-----|-------------------------------------------------------------------------------------------------------------------------------------------------------------------------------------------------------------------------|
| ex3_56_83576_x1 | ENST0000458908.1               | 15     | 0.005 | 30.2 | 1   |     | TAGCACTGTTGCCTGAGCCATTGGTGCTCCCTGGTACTAGCTCAGTTTTAATGCAGTGCA                                                                                                                                                            |
| ex3_56_83716_x1 | CM000672.2/19598247-19598463   | 14     | 0.009 | 28.2 | 1   |     | AAGACTGTGCTTTCAGGGATCATGTCTATAGTTTGCCACTAGAGAAGTTTTTTTGAACATGTAGTAGGGCACCAGAAGCACAAGGAAGAGGCACAGCCTTCTCCTGAGCATGAATCTGGCTCTTGGTCTTGGCTTTGTTCCAGCTACCATTTGCCATTGATTATGTCCTTCTTTCCTTCCAGAAAGTAAAAGGGAGAGAATGCAGTCTGAGTGGT |
| ex3_56_84392_x1 | CM000667.2/142626305-142626169 | 14     | 0.008 | 28.2 | 1   |     | CAATGCCTTGAGTTCAGTCGAGGACAGCTTCCCTTTTCTGTTAATTAACCTTTGGAATGTTGGGGCATTAAAACAGGCTAGGGTAGGTGATTGCACAGAGAATACTATTCTATTCATTCCTTCCAGAAAAACA                                                                                   |
| ex3_56_84513_x1 | CM000671.2/128749358-128749461 | 19     | 0.002 | 30.2 | 1   |     | ATCCTTTCGTAGTTTATAAGAGTGATGATTAGGTCTTCATGCTCATGTGTGAAATGTGCCTCCCTCAAACCATGTTAGGACGTTGGCATATTGCCCATCTGAAA                                                                                                                |
| ex3_56_84806_x1 | AL132709.5/129680-129609       | 15     | 0.003 | 30.2 | 1   |     | UGGAUCAUCAUGACUACUGGUAUUGGAUGGGUCUUCGUCAGUGAAUGCCUAUCUGGAACUCUGAGGUCCAU                                                                                                                                                 |
| ex3_56_85138_x1 | CM000684.2/19249840-19249966   | 14     | 0.008 | 28.2 | 1   |     | TCAAAGCTGATTTTAAAAGCTTAAAAAATAATCGCCAGGTACCATGCAAAAGCAATCTTCCCTTTAGAATGACTGATGGTATGCTAAGGTTTTTTCGTGGCATATTATTATAAAGGTGAATACAAAT                                                                                         |
| ex3_56_86363_x1 | CM000664.2/147323971-147324075 | 14     | 0.008 | 28.2 | 1   |     | ATCTTTTTGTAGTTCATGAGCACGATGATTGGGTTTTTACAAGAATGTGTGAGATGTGCCACCCTCTGAACCTTTTTATGATCTTGGCACATTACCCATCTGACC                                                                                                               |
| ex3_56_87119_x1 | CM000670.2/1                   | 15     | 0.004 | 30.2 | 1   |     | ATTCTTTTTTAGTTTTAAAAGTGTGATGATTAGGTTTTTCACTTGTGTGAGATGTGCCTTCCTCAAACCTTGTTACAACGCTGCACATTACCCATCGGACA                                                                                                                   |

|                        |                                                    |    |       |      |   |                                                                                                                                                   |
|------------------------|----------------------------------------------------|----|-------|------|---|---------------------------------------------------------------------------------------------------------------------------------------------------|
| x1                     | 125639<br>76-<br>112563<br>875                     |    |       |      |   |                                                                                                                                                   |
| ex3_56<br>87293_<br>x1 | AC008<br>581.11/<br>95393-<br>95256                | 27 | 2E-10 | 54   | 1 | UGGAGGACUGAGAAGGUGAGGCAGUUUUGCCCCGUGCUGCCUCCACCGGUUAA<br>GACCUCCAAAAUCGAAGGGCUGCCCAGGCAGAGGAUGUCCCCUUGCCACCCUUG<br>GAGGGGCAGCGCUGUGCUGGCCGACAUUUG |
| ex3_56<br>87461_<br>x1 | CM000<br>668.2/1<br>109634<br>66-<br>110963<br>569 | 15 | 0.004 | 30.2 | 1 | ATCTTTTTGTAGTTCATAAGCATGATGATTATGTTTTTACATTCATGTGTAAGATGTGC<br>CTCCCTCAAACCTTGTTATGATGTCAGCATATTACCTGTCTGATG                                      |
| ex3_56<br>88031_<br>x1 | ENST0<br>000038<br>4737.1                          | 15 | 0.004 | 30.2 | 1 | GTGCACATTTTCATTGACCTGCTTTCTTTTATGTGAGTAGTGTTATTTCTTATGTGCTAT<br>A                                                                                 |
| ex3_56<br>88617_<br>x1 | ENST0<br>000039<br>0977.2                          | 19 | 0.004 | 30.2 | 1 | ATACTGTGACAGTTGCATCGTTCAGCAGATTGAGTCACGAAGAGATGTATACCATCT<br>GTC                                                                                  |
| ex3_56<br>88722_<br>x1 | AC010<br>325.7/1<br>32197-<br>132107               | 23 | 4E-08 | 46.1 | 1 | GGGCCUCCAUGAUGUCCAGCACUGGGCUCCGACUGCCACUGAGGACACGGUGCC<br>CCCCGGGACCUUUGACACCCGGGGGUCUGAGGGGCC                                                    |
| ex3_56<br>88963_<br>x1 | ENST0<br>000045<br>9128.1                          | 14 | 0.009 | 28.2 | 1 | GGATCGATGATGAGAATAATTGTCTGAGGATGCTGAGGGACTCATTCCAGATGTCAA<br>TCT                                                                                  |
| ex3_56<br>89140_<br>x1 | CM000<br>674.2/8<br>418344<br>8-<br>841833<br>24   | 14 | 0.009 | 28.2 | 1 | GCTGACACTAGAGTAACATCCTGACACAGCTCTTGTCTGGTGTGCTAGAGTTCTCG<br>ATGAATCTACTGGTCTTGATTCAGTGGCAGGAGCAGTGACTGTGTTAGTATGCGTAT<br>CTGAAACATGG              |
| ex3_56<br>90067_<br>x1 | AC107<br>390.4/3<br>3836-<br>33915                 | 14 | 0.009 | 28.2 | 1 | UUGAUCUACCUCUGAUGAAACCUGUGUUGGUGGGGACAUCUGAGAGUGUUGAUG<br>AAUGCCAGUGACUCUGAUAGAAAAA                                                               |
| ex3_56<br>90121_<br>x1 | CM000<br>679.2/2<br>802246                         | 14 | 0.008 | 28.2 | 1 | TAGAAGCCAATTAAGCCAACTGAGTTTCTTTCCTCACAGGGACCTGGTGTGCCATGG<br>CTGCAAACAGCAGCTTCTTGTGTCAGGGTACGCAGACTGTTTCTTGGATGGGTTGCTC<br>TAAGGGACCTTGGAGACAGGC  |

|                        |                                                    |    |            |      |   |                                                                                                                                               |  |
|------------------------|----------------------------------------------------|----|------------|------|---|-----------------------------------------------------------------------------------------------------------------------------------------------|--|
|                        | 4-<br>280223<br>30                                 |    |            |      |   |                                                                                                                                               |  |
| ex3_56<br>90457_<br>x1 | AC079<br>121.5/4<br>2943-<br>42813                 | 18 | 6E-05      | 36.2 | 1 | UUCCAAAGUGUUGAGUUCAGUCCAGGGCAGCUUCCCUGUUCUGUUAAUUAACUU<br>UGGGACAUUGAAAUGGGCUAGGGGAGAUGAUUGGGUAGAAAGCAUUUUUUUUC<br>AUUUGCCUCCCAGCCUACAAA      |  |
| ex3_56<br>91149_<br>x1 | X8737<br>3.1/278<br>6-2857                         | 15 | 0.004      | 30.2 | 1 | AAUGAAUGAUGACAAAAUGUUUCAGUCCCAAUGAUACAUCUGAUUUUACCAUUA<br>UAUUUAUCCUGACAUU                                                                    |  |
| ex3_56<br>91163_<br>x1 | ENST0<br>000039<br>0962.1                          | 17 | 0.000<br>2 | 34.2 | 1 | AAATAATGAAATCACCCAAAATAGCTGGAATTACTGGCAGATTGTGTAGCAATAACC<br>TA                                                                               |  |
| ex3_56<br>93450_<br>x1 | CM000<br>685.2/1<br>351833<br>06-<br>135183<br>190 | 14 | 0.008      | 28.2 | 1 | AAGACTATACTTGCAGGGATCATTCTGTAGTTGGTTACTAGAGAAGTTTCTGTGACA<br>GGGCACAGTACCAAATTTTAAAAGAATGCACTTCAAATCTTCAAAGTTAGGATTGGAG<br>A                  |  |
| ex3_56<br>94803_<br>x1 | ENST0<br>000038<br>3961.1                          | 14 | 0.009      | 28.2 | 1 | GGATCGATGATGACTTCCTTATATACATTTCCTTGGAAAGCTGAACAAAATGAGTGAAA<br>AC                                                                             |  |
| ex3_56<br>94950_<br>x1 | CM000<br>668.2/6<br>866524<br>5-<br>686651<br>28   | 31 | 2E-12      | 61.9 | 1 | AAGACTATACTTTTCAGGGATCATTCTATAGTTTGTACTAGAGAAGTTTCTCTGAACG<br>TGTAGAGCACCGAGAACCTACAAAATACCATGAAATGAGAAGTGATGATAAAGAGTG<br>GT                 |  |
| ex3_56<br>95184_<br>x1 | ENST0<br>000061<br>5323.1                          | 18 | 1E-04      | 36.2 | 1 | AACACTTCCATGCACCATTTCTATAGTTTCTTACCAGAGAAGTTTCTCTGAACATGTG<br>GA                                                                              |  |
| ex3_56<br>96037_<br>x1 | CM000<br>663.2/6<br>710277<br>9-<br>671026<br>45   | 14 | 0.008      | 28.2 | 1 | ATGCATCTATTTGACAGACCTGGAGTAGTTACTGTCTGCTGCTAAGGTTTCCACTACA<br>GATGCAAGAAAAAATATTCTCGAGTTTTCTGTCTGTCTGATTGTGGCCTCTGAGAT<br>TGAATAGAGGAATACAGTG |  |
| ex3_56<br>96049_<br>x1 | AC073<br>210.8/1<br>29951-                         | 14 | 0.008      | 28.2 | 1 | UUGCACAGUGAACACCCAAGUGUGCUUUUAGUUCUUUGGCUUUGACCCUGUGC<br>UAGAGCAUUGCCUGUCUCUUCUCCUCUGCAUUGAAAGGAAUAAUUUUCUUUAAA<br>UGUAUUCAGAAAGCCAGCACAUUA   |  |

|                 |                                                            |    |       |      |   |                                                                                                                                                                                                                                     |
|-----------------|------------------------------------------------------------|----|-------|------|---|-------------------------------------------------------------------------------------------------------------------------------------------------------------------------------------------------------------------------------------|
| ex3_56_97017_x1 | 130084<br>CM000<br>685.2/4<br>808176<br>7-<br>480818<br>70 | 14 | 0.008 | 28.2 | 1 | ATCCTTTTGTAGTTCCTAAGCATGATGATTGGGTGTTTCATGTGCTTATGTGAGATGTG<br>CCTTTCTCAAACCTTGTTATGACATCAGCACATTATTCATCTGATA                                                                                                                       |
| ex3_56_97159_x1 | CM000<br>665.2/4<br>878702<br>-<br>487859<br>9             | 14 | 0.008 | 28.2 | 1 | ATTCTTCTATAGTTCATGAGCATGATGATTGGGTGTTTCATGACATGTGTGAGATGTGC<br>CACCCCTCTGAACCTTGTTCCCACATCGGCACATTATCCATCTAACC                                                                                                                      |
| ex3_56_98399_x1 | CM000<br>669.2/1<br>483896<br>45-<br>148389<br>859         | 14 | 0.009 | 28.2 | 1 | TAGTAACACTTCCATGCACCATTTCTATAGTTTCTTACCAGAGAAGTTTCTCTGAACAT<br>GTGGAGCACCGGAAACCACGAGGAGGCGGCTCAGCATTCACTCCTGAGCATGAAGC<br>TGGCTCTTGGTGGTGCTTCTCTGCAATTGCCTTTTGCTGCTGATGATCACTCTTCTCT<br>TCCTTTGGGAGAGTGAAAGGGAAAGGAAGCCATCTGAAGGGT |
| ex3_56_98480_x1 | ENST0<br>000038<br>4234.1                                  | 15 | 0.003 | 30.2 | 1 | GGCTTCCTAGTACTTACCATGGTCTGTGTTCTTACGCTGACTGTATAGAAACAGGAG<br>GCA                                                                                                                                                                    |
| ex3_56_98613_x1 | ENST0<br>000038<br>4053.1                                  | 16 | 0.000 | 32.2 | 1 | GGCTTCTCATTGAGCTCCTTTCTGTCCATTGATGGCAGTTGATGGATTTGCATGAGAA<br>GA                                                                                                                                                                    |
| ex3_56_99346_x1 | AC011<br>120.11/<br>127524<br>-                            | 16 | 0.000 | 32.2 | 1 | CAGACAUUCAUUUUUAUCCAGUUUCUUCUCAAGUGAAGAUAAUUUUUGUAAA<br>GUCCUAAAGUCAUGUAGAAUGUAGUAGCUUUCUGUUCACACUGUACAAUAAAA<br>GGAUGGAUCAUUCUACAACUGACAUUA                                                                                        |
| ex3_56_99447_x1 | ENST0<br>000051<br>7218.1                                  | 16 | 0.000 | 32.2 | 1 | TTGCAGGTTTGCTCCAAGGTTTAAACATGAACACTAGTCAAGCTAATTGTGCTCCTCT<br>CC                                                                                                                                                                    |
| ex3_57_00798_x1 | ENST0<br>000036<br>4393.1                                  | 14 | 0.009 | 28.2 | 1 | TGGATCAATGATGTCCACTGGTGGCGTATAAATCATATTTGGTGAATATATGTCTGGA<br>AC                                                                                                                                                                    |
| ex3_57_01199_x1 | ENST0<br>000036<br>4946.1                                  | 14 | 0.008 | 28.2 | 1 | CCAACATGGATACCCTGGGAAGTCACTCTCCCCAGGCTCTGTCTAAATGGCATAGGG<br>GAG                                                                                                                                                                    |
| ex3_57          | ENST0                                                      | 17 | 0.000 | 34.2 | 1 | GCTGACACTAGAGTAACATCCTGACACAGCTCTTGTCCTGGTGTGCTAGAGTTCTCG                                                                                                                                                                           |

|        |         |    |       |      |   |                                                               |
|--------|---------|----|-------|------|---|---------------------------------------------------------------|
| 02423_ | 000040  |    | 2     |      |   | ATG                                                           |
| x1     | 8221.1  |    |       |      |   |                                                               |
| ex3_57 | ENST0   | 18 | 0.008 | 28.2 | 1 | AGGACATTTCAATGCGGGCTCATGGGGCTGTGAAGCCAAGAGCTATTAACACTATGA     |
| 02573_ | 000036  |    |       |      |   | CCA                                                           |
| x1     | 2522.1  |    |       |      |   |                                                               |
| ex3_57 | ENST0   | 18 | 3E-05 | 36.2 | 1 | GCATGGCCGAATACTGTGTTTTATCAGTAGTTTACACAGCCAGACACCCATGCAAAA     |
| 02583_ | 000038  |    |       |      |   | GCA                                                           |
| x1     | 4439.1  |    |       |      |   |                                                               |
| ex3_57 | CM000   | 15 | 0.003 | 30.2 | 1 | ATCCCTTCGTAGTTCATAAGCGTGATGACTGGTTTTACGCTCACGTGTGAGATGTTC     |
| 02617_ | 663.2/2 |    |       |      |   | CTCAAACCTATGATGACATTGTCACGTTACCAGTCTGATG                      |
| x1     | 388225  |    |       |      |   |                                                               |
|        | 5-      |    |       |      |   |                                                               |
|        | 238823  |    |       |      |   |                                                               |
|        | 52      |    |       |      |   |                                                               |
| ex3_57 | AC020   | 25 | 3E-09 | 50.1 | 1 | UGCAGCUGUGUCAAAUUUGGUGCCUGCCCUGCCUGUGUAGGCACUGACCCAGAA        |
| 02713_ | 634.16/ |    |       |      |   | GGCUGCCACAGAAACACUGACUCAUGGGCCUGUCCUGUGUCUCGGGCUCAGG          |
| x1     | 18995-  |    |       |      |   | GAUAAUUUGGUUACAGAUACCA                                        |
|        | 18865   |    |       |      |   |                                                               |
| ex3_57 | ENST0   | 14 | 0.009 | 28.2 | 1 | CTGCATTTTACCCTCCCTGATGGGGCTCAGTGTGCAGCAGCTGGAAAAAGTAGATGC     |
| 02789_ | 000051  |    |       |      |   | CCT                                                           |
| x1     | 7233.1  |    |       |      |   |                                                               |
| ex3_57 | ENST0   | 14 | 0.009 | 28.2 | 1 | TTGCATGAGGAAGTATCTGCTCTTCATTCCTTTGGGAGGAGAAATACATCCATAACAT    |
| 03094_ | 000045  |    |       |      |   | GC                                                            |
| x1     | 9316.1  |    |       |      |   |                                                               |
| ex3_57 | CM000   | 16 | 0.001 | 32.2 | 1 | GCACCCCTTTAAGGCTGATGCAATGCTTTAAGAGGCTAACGCAGAAGGGTGAAGCC      |
| 03586_ | 669.2/1 |    |       |      |   | AGTCTCCTTAAAACCCAAAGAAGAGATTGTAACCTTCTCTTTGGATCCTGTCTGGAG     |
| x1     | 526093  |    |       |      |   | TCACAGCT                                                      |
|        | 13-     |    |       |      |   |                                                               |
|        | 152609  |    |       |      |   |                                                               |
|        | 434     |    |       |      |   |                                                               |
| ex3_57 | ENST0   | 21 | 5E-07 | 42.1 | 1 | TGATGGCAATGATGATTTTTTACACTTATTGTTGTTACCTGATAACATAAATATGAGGG   |
| 03853_ | 000060  |    |       |      |   | T                                                             |
| x1     | 7707.1  |    |       |      |   |                                                               |
| ex3_57 | ENST0   | 14 | 0.009 | 28.2 | 1 | AAGACCCTTCAGCTGCAAACAACAGCTTCCTTGGTAGTTTATGCAGCCTGTTTCTTGT    |
| 04791_ | 000051  |    |       |      |   | AT                                                            |
| x1     | 6717.1  |    |       |      |   |                                                               |
| ex3_57 | ENST0   | 15 | 0.007 | 30.2 | 1 | TTCCTAAAGATTCACAATGAACATTATTATTTAAGAGCTTTTTGAAGTGCAAATCCATG   |
| 05101_ | 000051  |    |       |      |   | A                                                             |
| x1     | 7285.1  |    |       |      |   |                                                               |
| ex3_57 | CM000   | 15 | 0.004 | 30.2 | 1 | ATTCTTTTTTGGTTCATAAGTGTGATGATTTTCGTTTTTCATGTTAAAGTGTGAGATCAGC |

|                 |                                                    |    |            |      |   |                                                                                                                                           |
|-----------------|----------------------------------------------------|----|------------|------|---|-------------------------------------------------------------------------------------------------------------------------------------------|
| 05153_x1        | 666.2/1<br>835823<br>01-<br>183582<br>195          |    |            |      |   | CTCCCTCAAACCTTGTTACTACATCAACACCACATTATCCATCCAATG                                                                                          |
| ex3_57_05352_x1 | AJ6094<br>35.1/1-<br>128                           | 33 | 8E-14      | 65.9 | 1 | GUGCACAUUUCAUUGACCUGCUUUCUUUUUAUGUGAGUAGUGUUUUUUUCUUAUGUG<br>CUAUACAAUAAUUGAAGGCUAAUUAGCAGUAUAACUAUAAAUAGUAAUGCUGCCA<br>GUCUCCUUCAGACAAAA |
| ex3_57_05814_x1 | ENST0<br>000060<br>7261.1                          | 14 | 0.008      | 28.2 | 1 | TGGATCAATGATGAGTATTGGTGGAGGTGTCTGAATCAACACTTTTGATTAAGCCCTC<br>TG                                                                          |
| ex3_57_06112_x1 | ENST0<br>000039<br>1302.1                          | 15 | 0.005      | 30.2 | 1 | TGCCCCTGACCTGGGAAGAGAGGGGCCTGGCTGGTGGTATCCATCTCATACCAGCT<br>AGGG                                                                          |
| ex3_57_06295_x1 | AC080<br>089.5/4<br>2226-<br>42352                 | 15 | 0.003      | 30.2 | 1 | GGGGUGUGCUCAGAGCAGGGGGCUGAAGAAUGGCUCCUCUGUUUUAUAACACAUG<br>GAACAGGCAUCUGAGGUCACUGUGACAAGGGGCACAAAACUUGUGACUCCCUAAG<br>AACAAAUGUCCUACAAGU  |
| ex3_57_06497_x1 | ENST0<br>000036<br>3883.1                          | 15 | 0.002      | 30.2 | 1 | CTACAAAGATAGCAACACTTTTCATCAACAGCAGTTCACCTAGAGAGAGTCGACACTT<br>TT                                                                          |
| ex3_57_07351_x1 | CM000<br>669.2/1<br>386251<br>88-<br>138625<br>060 | 18 | 3E-05      | 36.2 | 1 | AATACTTCATTTAGTTCCATTAACAAAATCTAAAGTTGATTTATAGGCAGGTACAAAA<br>AATCAATCCTCTTTTGCAATCCAGAACTCATTGTTTCAGTATAAGTTTTGCTACAAATA<br>GAAGGGGTATT  |
| ex3_57_08289_x1 | ENST0<br>000039<br>1143.1                          | 16 | 0.000<br>8 | 32.2 | 1 | TGTCCTTGACTTGGGTAGAGTGATGTCTGGTTGGTGCTGCCTATCTCATATAAGCCA<br>GGG                                                                          |
| ex3_57_09568_x1 | CM000<br>668.2/4<br>354414<br>4-<br>435442<br>70   | 16 | 0.000<br>6 | 32.2 | 1 | CTGAAGACTAAGAAAATAGAGTCCTTAAAGTCAAGCTGAGTCTGCTGTTAGCCTCCTA<br>AATGAAAGGATAGACAGAACAGGTCTGTTTGCAAATAAATTCAAGACCTACTTATC<br>TACCGACAGCA     |
| ex3_57_10013_x1 | CM000<br>672.2/1<br>012808<br>97-                  | 15 | 0.006      | 30.2 | 1 | AAGACTGTACTTTTCAGGGATCATTTCTTTAGTTCATTACTAGATAAGTTTCTCTGAATA<br>TGTAGAGCGCTGAATTATAAT                                                     |

|        |         |    |       |      |   |                                                              |  |
|--------|---------|----|-------|------|---|--------------------------------------------------------------|--|
|        | 101280  |    |       |      |   |                                                              |  |
|        | 976     |    |       |      |   |                                                              |  |
| ex3_57 | CM000   | 19 | 0.003 | 30.2 | 1 | ACTCTTTTCATCTTTTTTGTGATGACTGGATTTTCATGCTGTTATGTGAGATGTGCCTCC |  |
| 10020_ | 685.2/1 |    |       |      |   | CTCAAACCTTGTGATGACATCTTGGCACATTACCCATCTGATG                  |  |
| x1     | 241332  |    |       |      |   |                                                              |  |
|        | 76-     |    |       |      |   |                                                              |  |
|        | 124133  |    |       |      |   |                                                              |  |
|        | 377     |    |       |      |   |                                                              |  |
| ex3_57 | ENST0   | 15 | 0.006 | 30.2 | 1 | AATTCTATACTTTGAGGAGCCATTTTCATAGTTTGTACTAGAGAAGTTTCTCTGAACA   |  |
| 10244_ | 000040  |    |       |      |   | T                                                            |  |
| x1     | 8405.2  |    |       |      |   |                                                              |  |
| ex3_57 | AL132   | 15 | 0.004 | 30.2 | 1 | UUGAUGAUUAUGAUGGCCACUGGUGGCUUAUGAGUCUUAUACAGUGAAUACAUGUU     |  |
| 10364_ | 709.5/1 |    |       |      |   | UGAAACUCUGAGGUCUGU                                           |  |
| x1     | 56819-  |    |       |      |   |                                                              |  |
|        | 156747  |    |       |      |   |                                                              |  |
| ex3_57 | ENST0   | 14 | 0.008 | 28.2 | 1 | AAGATTATACTTTTCAGGAATCATTCTATAGTTTGTACTAGAGAAAGTTCTCTGAATG   |  |
| 10647_ | 000036  |    |       |      |   | T                                                            |  |
| x1     | 3352.2  |    |       |      |   |                                                              |  |
| ex3_57 | CM000   | 14 | 0.008 | 28.2 | 1 | AAGACTATATTTTCAGGGGTCACCTTCTATAGTTTGTACTAGAGAAGTTTCTCTGAACA  |  |
| 11358_ | 685.2/1 |    |       |      |   | GGTAAAGATAAAAAGCACATATGTACTGTGT                              |  |
| x1     | 205894  |    |       |      |   |                                                              |  |
|        | 41-     |    |       |      |   |                                                              |  |
|        | 120589  |    |       |      |   |                                                              |  |
|        | 530     |    |       |      |   |                                                              |  |
| ex3_57 | ENST0   | 15 | 0.006 | 30.2 | 1 | AGGCCAATGCTGAATTATTATCTTGACGAGAAATGATGACGTAAAAATTAAGCTTAGT   |  |
| 14425_ | 000039  |    |       |      |   | AG                                                           |  |
| x1     | 1109.1  |    |       |      |   |                                                              |  |
| ex3_57 | CM000   | 14 | 0.009 | 28.2 | 1 | TAGCACTGTTGCCTGAGCCATTGGTGTCCCTGGTACTAGCTCAGTTTTAATGCAGT     |  |
| 15008_ | 685.2/1 |    |       |      |   | GCAATAGGAATTCTTTGTTTCCACAAGGCCTTGTCTGCTGTGGGCTGCTCCTTCCC     |  |
| x1     | 187380  |    |       |      |   | ACAGTTGGACCTTG                                               |  |
|        | 55-     |    |       |      |   |                                                              |  |
|        | 118738  |    |       |      |   |                                                              |  |
|        | 182     |    |       |      |   |                                                              |  |
| ex3_57 | ENST0   | 22 | 4E-05 | 36.2 | 1 | AAGACTCTACTCTCAGGGCTCATTCTGTCAATCAACTAGAGAAGTTTCTCTGAAT      |  |
| 16138_ | 000040  |    |       |      |   | GT                                                           |  |
| x1     | 8116.2  |    |       |      |   |                                                              |  |
| ex3_57 | CM000   | 14 | 0.009 | 28.2 | 1 | CCAACATGGATAGTCTGGGAGGTCACTCTCCCCAGGCTCTGTGGAAGTGGTGTGG      |  |
| 16509_ | 670.2/5 |    |       |      |   | GGAGCATAGACGTTTGGTCCATGACGTACAGTACAGCCCCTTCCACAATGCTGGAG     |  |
| x1     | 433068  |    |       |      |   | ATGAAGCTGGGTCTCCTGTCTGCGCCTGCATATTCCTATAGCTTCCCTGAGTCCTGT    |  |
|        | 7-      |    |       |      |   | GGATGATGACTGGTGAGACAAATCGTGCAGGAAACAAGT                      |  |

|        |         |    |       |      |   |                                                              |  |
|--------|---------|----|-------|------|---|--------------------------------------------------------------|--|
|        | 543308  |    |       |      |   |                                                              |  |
|        | 95      |    |       |      |   |                                                              |  |
| ex3_57 | CM000   | 16 | 0.001 | 32.2 | 1 | ATCCTTTTCGTAATTCATAAGCATGATTTGGGTGTTTATACTCAGATATGAGATAAGCCT |  |
| 16605_ | 685.2/3 |    |       |      |   | TTCTCTAAACTTATGATGTTGGCACACTACCCATTTGATA                     |  |
| x1     | 284800  |    |       |      |   |                                                              |  |
|        | 5-      |    |       |      |   |                                                              |  |
|        | 328479  |    |       |      |   |                                                              |  |
|        | 07      |    |       |      |   |                                                              |  |
| ex3_57 | CM000   | 14 | 0.009 | 28.2 | 1 | ATCCTTTTGTAGTTCATAAGCATGATGAGTGGGTTTTCCACTGCTGTGTGAGATGTG    |  |
| 16755_ | 679.2/6 |    |       |      |   | CCTTCCTCAAGCCTCGTTACAATGTCAGCACATTATCCATCTGATG               |  |
| x1     | 096189  |    |       |      |   |                                                              |  |
|        | 3-      |    |       |      |   |                                                              |  |
|        | 609617  |    |       |      |   |                                                              |  |
|        | 90      |    |       |      |   |                                                              |  |
| ex3_57 | CM000   | 15 | 0.002 | 30.2 | 1 | ATCCTTTTGTGCTTCATAAATGTGGGTTTTCCAACGTGCATGAGATGGCCCTCAAACCT  |  |
| 18161_ | 668.2/1 |    |       |      |   | TGTTACAACGATGCACTTTACTCGTTTGATG                              |  |
| x1     | 572913  |    |       |      |   |                                                              |  |
|        | 99-     |    |       |      |   |                                                              |  |
|        | 157291  |    |       |      |   |                                                              |  |
|        | 311     |    |       |      |   |                                                              |  |
| ex3_57 | CM000   | 15 | 0.005 | 30.2 | 1 | ATCCTTTTGTAGTTCATGAGGATGATGGTTGGGTGTTTCACACATGTGTGTGAAATGT   |  |
| 18870_ | 675.2/4 |    |       |      |   | ACCACCCTCAAACCTTGTTACAATGTCAGCACATTACCTGCCTGACC              |  |
| x1     | 462867  |    |       |      |   |                                                              |  |
|        | 3-      |    |       |      |   |                                                              |  |
|        | 446285  |    |       |      |   |                                                              |  |
|        | 69      |    |       |      |   |                                                              |  |
| ex3_57 | CM000   | 18 | 4E-05 | 36.2 | 1 | ACCTGCATTCAAAAATGATCACGGGCTGCCTGTGCTCTGGTCATCAATAACGCAGGG    |  |
| 18891_ | 682.2/3 |    |       |      |   | AGAGGAATTGCTGAAAGCCGTTTCCCGTGTTTGGAGGGTTCACACCTGTCCCTTTCA    |  |
| x1     | 844937  |    |       |      |   | AATGCTGGCGCTTTCACACA                                         |  |
|        | 0-      |    |       |      |   |                                                              |  |
|        | 384495  |    |       |      |   |                                                              |  |
|        | 03      |    |       |      |   |                                                              |  |
| ex3_57 | CM000   | 14 | 0.009 | 28.2 | 1 | AAGACTATCCTCTCAGTGATGATTTCTATAGTTCGTTACTAGAGAAGTTTCTCTAAACA  |  |
| 18940_ | 669.2/1 |    |       |      |   | TGTAGAGAGCATCAGAAACCACAAAAAAGAGGTGCAGCGGTCTCTCCTGAGTGTGAA    |  |
| x1     | 079999  |    |       |      |   | GCTGGCTCTTGGTATTGCTTCTTGGTTCTTCTTCTTCTTTGGGAGAGTAAGAGGAAG    |  |
|        | 82-     |    |       |      |   | AGGATGCAGTCTTAGTAGT                                          |  |
|        | 107999  |    |       |      |   |                                                              |  |
|        | 791     |    |       |      |   |                                                              |  |
| ex3_57 | ENST0   | 14 | 0.008 | 28.2 | 1 | CCAATGTGGATACACCAGGAGGTCACTCTCTCCCAGGCTGTGTCCAAGTAGCATA      |  |
| 18958_ | 000036  |    |       |      |   | GGG                                                          |  |

|                 |                                  |    |            |      |   |                                                                                                                                                                                                                                 |
|-----------------|----------------------------------|----|------------|------|---|---------------------------------------------------------------------------------------------------------------------------------------------------------------------------------------------------------------------------------|
| x1              | 4478.1                           |    |            |      |   |                                                                                                                                                                                                                                 |
| ex3_57_18988_x1 | AC007_240.2/2_2839-22705         | 42 | 5E-19      | 83.8 | 1 | UAGGCCCUCAAUCAAGACUAGUGUUUUGCUGUAGCUGUUGGUUUCAAACAGGAUC<br>CGAGAGUGAUGUCUUCUUGUGGUCUGUUCACUGCUCAGUAUCCCAGUGUCAGU<br>GGCCAAUUCAGUUGGAAGCAACAUGG                                                                                  |
| ex3_57_19181_x1 | CM000_679.2/5_863183_6-586316_41 | 19 | 0.008      | 30.2 | 1 | AAGACTATATTTTGGAGGGATAATTTCTATAGTGTGTTTCTCGAGGAGTATATCTGAAC<br>GTGTAGAACGCTGGAAACCGCGAGAGGGAGATATTTGTGTTCTCTCACGAGTGGGA<br>TAGCAGTGTGGTGTGGCGTTATTCTAACTGCTGTTGCTGTTGGTACCCTTCTTC<br>TCTAGAGAAGGCAGTCTGAGTAGT                   |
| ex3_57_19272_x1 | CM000_675.2/5_655962_4-565597_25 | 15 | 0.004      | 30.2 | 1 | ATCCATTTGTAGTTCAGAAACATGACTATTGTCTTTTCAAGCTTATATGAGATCTGGCT<br>CCCTCAATCCTTGCTATGATATCAGTACATTACCTGTCTGATG                                                                                                                      |
| ex3_57_19673_x1 | CM000_679.2/4_888084_0-488809_67 | 14 | 0.008      | 28.2 | 1 | GTCGCACTTAAACTTAAGACTCTTTTTCTTGCAGCAGTGGTTTAAACAGAGGAACAAA<br>CAGGAAGATCTTGTGCCTTTGAGGGGCTGTGGTTGGGCCCTCAAAGTGACTTTG<br>GAGTTCTACGCCA                                                                                           |
| ex3_57_20990_x1 | ENST0_000057_9995.1              | 23 | 1E-05      | 38.2 | 1 | AACTATTGAGAACAAGATGCAACATACCACTCGAGTGTGCAGTGGGGAAGCCAACC<br>TTG                                                                                                                                                                 |
| ex3_57_21740_x1 | CM000_682.2/3_384229_-338444_0   | 16 | 0.000<br>5 | 32.2 | 1 | AAGACTATACTTTCAGGGATCATTCTGTAGTTCATTATTAGAGAGGTCTCTCTGAAT<br>GAGTAGAGCACTAGAAACCACAGAAGGAGGCACAGTGGTCTCTCCTGAGCATAAAG<br>CTGGTTTTTGATGTTGCTTTGCTGCAACTGCCATTCGTCACTGATGACTGTTTTCTTC<br>CTCTGGGAGAGTAAGAGGGAGAGGACACTATCTGAGTGTT |
| ex3_57_21995_x1 | ENST0_000039_1291.1              | 15 | 0.003      | 30.2 | 1 | CACTAGAAGACAGAATTCACAGAAGTAGCATTTCACCTTTTGCCTTTACAGAAGTATA<br>TT                                                                                                                                                                |
| ex3_57_22055_x1 | ENST0_000036_2412.1              | 14 | 0.008      | 28.2 | 1 | TGGCAAGCCTCCAGCGTGCCTGGGTCTGTGGTGTGTTGATGTGTGCATTCTACTGCTT<br>GCCA                                                                                                                                                              |
| ex3_57_22506_x1 | ENST0_000039                     | 16 | 0.001      | 32.2 | 1 | GTTTCATGATAAGTAACATTTCTTCAATTTGACCTGATGTGTATTGAAGAAAACCAGCAT<br>C                                                                                                                                                               |

|                        |                                                  |    |            |      |   |                                                                                                                                                      |
|------------------------|--------------------------------------------------|----|------------|------|---|------------------------------------------------------------------------------------------------------------------------------------------------------|
| x1                     | 0968.1                                           |    |            |      |   |                                                                                                                                                      |
| ex3_57<br>22886_<br>x1 | AC104<br>581.22/<br>69359-<br>69497              | 22 | 2E-07      | 44.1 | 1 | UGGCUCGAUUUCCUGGGGGGUGGUCUCAGCCCACUCCACCUCCCCUCAGCCGAG<br>CCUAGAGUAGAGGGGGCCAGGCAUCCUCCCCAGGGGAGGGGCGUUUAAGCAAGGA<br>GCCUCUCCUGGGCUGUCCUAGCCUCACAUUU |
| ex3_57<br>23525_<br>x1 | CM000<br>672.2/1<br>588635<br>8-<br>158864<br>65 | 21 | 0.000<br>2 | 34.2 | 1 | ATCCTCTGGTAGTTTGTAAAGTGTGATGATTGAGTATTCACATGCATGCATGTGTGAGA<br>TGTGTCACTCCCAAACCTTATTGCAACATGGGCACATTACCCATCTCACA                                    |
| ex3_57<br>23699_<br>x1 | ENST0<br>000036<br>4630.1                        | 14 | 0.008      | 28.2 | 1 | TGGACCAATGATGATGACTGGTGGTGTATGAGTTAAAGGTGATGAATAGTAAGTGTC<br>TTT                                                                                     |
| ex3_57<br>24033_<br>x1 | CM000<br>675.2/4<br>118008<br>7-<br>411799<br>81 | 15 | 0.002      | 30.2 | 1 | ATCCTTTTGTAGTTTATAAGCGTGATGACTGGGGTTTCACGTGCATGTGTGAAATGTG<br>CCTTCCCCAAGCCTTGTTATGACCTCATTGGAACATTACCCCTTTGACA                                      |
| ex3_57<br>24547_<br>x1 | ENST0<br>000039<br>1095.1                        | 18 | 0.008      | 28.2 | 1 | ATTCTTAAATGAATGATGAAATACCAAAAAGAAAAATAAGCAAAGAACAGATAACAGA<br>AA                                                                                     |
| ex3_57<br>24680_<br>x1 | ENST0<br>000041<br>1005.1                        | 21 | 5E-07      | 42.1 | 1 | GTGCCGTGATGTATTTGTCAACACATCACTCTGAAGAAAAGTATGTGGTGACTIONCTG<br>TG                                                                                    |
| ex3_57<br>25233_<br>x1 | ENST0<br>000036<br>5398.2                        | 18 | 0.008      | 28.2 | 1 | AATTGTATACTTTCAGGGATCATTCCATAGGTTGTTACTAGAGAAGTTTTTTTAGATGT<br>G                                                                                     |
| ex3_57<br>25410_<br>x1 | ENST0<br>000051<br>6391.1                        | 14 | 0.008      | 28.2 | 1 | TGGTCAGGCTGTGGCTGTGGCACAGCACTTGGCTTTCTCCTGGGGGCACTGGGGAG<br>CCAT                                                                                     |
| ex3_57<br>26360_<br>x1 | AC078<br>860.19/<br>16828-<br>16700              | 16 | 0.001      | 32.2 | 1 | AUUUUACAUAAGCGCUGCAGAUGUGGCUGCUGUGUCACAUUUGUGUUUUUAGGUG<br>GCAGAGAGAAGAGAGGCUAUGUCUAUGCUCAGUGUUCUGCCCCAUGAACAUUUGA<br>AUGUUUAAUAGUCAGACACU           |
| ex3_57<br>26510_<br>x1 | ENST0<br>000036<br>4099.1                        | 14 | 0.009      | 28.2 | 1 | CGGGTGGTGTGATGACCCCAACATTCCATCTGAATGCCTGTGCTGAAACCCAGAGGCT<br>GTTT                                                                                   |
| ex3_57                 | CM000                                            | 15 | 0.005      | 30.2 | 1 | ATCCTCCTGTAGTTCCTGAGCGTGACGACGGGGTGTTCGTGCGCGTGTGAGATGTG                                                                                             |

|                 |                                                    |    |            |      |   |                                                                                                                                                                                                                             |
|-----------------|----------------------------------------------------|----|------------|------|---|-----------------------------------------------------------------------------------------------------------------------------------------------------------------------------------------------------------------------------|
| 26864_x1        | 674.2/1<br>308153<br>53-<br>130815<br>450          |    |            |      |   | CCACCCTCGAACCTCATTACATCAGCACATCACCCACTGGCC                                                                                                                                                                                  |
| ex3_57_26868_x1 | ENST0<br>000045<br>8890.1                          | 14 | 0.008      | 28.2 | 1 | ATCCTTCTTTAGTTCATAAGCATGATGATTGGGTTTTTCATGTACATGTGTGAGATGTGCC                                                                                                                                                               |
| ex3_57_27140_x1 | CM000<br>683.2/9<br>907916<br>-<br>990801<br>0     | 16 | 0.001      | 32.2 | 1 | CTACAATCAATTAAGCCACATGGGACCTGGTGTGCAAGGGCTGCAAACAGCAGCATCCTAGGTAGTGTACAGCAGCCTGTTCCTTGTGTACAACA                                                                                                                             |
| ex3_57_28357_x1 | CM000<br>666.2/1<br>684714<br>09-<br>168471<br>539 | 14 | 0.008      | 28.2 | 1 | GGCTTGCTGGTGTACCACAGGCTGAATTCTTACACTGACTATATAGAAAAGGAGGTAGAGTAAACCTACCCAATATACCCCTCAGCCCAGGCTCTGTGCCTGATCTATATTGTGAATGTGGGAACATAG                                                                                           |
| ex3_57_28615_x1 | ENST0<br>000051<br>5935.1                          | 16 | 0.001      | 32.2 | 1 | AGGTCATTTTGTAGGGCTTGTGGGCTGTGAAACCAAGAGCTCTTAACGCTATGACCA AAT                                                                                                                                                               |
| ex3_57_29057_x1 | AC069<br>157.8/6<br>5923-<br>65741                 | 15 | 0.002      | 30.2 | 1 | AUGGUCUGGGGAAAGGCUCCUGUGUGGCUGAACCCUGCCCAGCUGUGGGUGCAGCCUUGUACCAGGCACCCCAACCCUGACCUAAAGUAAAUCCAGGAGAAGUCUUUCUGGGAUUUUGAAUUUGCAGUACAGGUGUGAACAUUCUAGCGCAGUUUGAUCAUUAUGAUACUAAAACAGGA                                         |
| ex3_57_29866_x1 | CM000<br>665.2/4<br>189925<br>3-<br>418991<br>11   | 16 | 0.000<br>7 | 32.2 | 1 | TAGTCAGGCAGGATAATCCCTATCTGTTCCTCCTTTTGGAGGGCAGTAGAATGTGGTAATTGGAGTGGCATAATACTTGATTAATAATTGTGCACTTTCCAATTCATGCTATTATGGCTTCCTGGAGTGGTGTCTTCTCTGAT                                                                             |
| ex3_57_30264_x1 | CM000<br>685.2/1<br>228404<br>26-<br>122840<br>645 | 16 | 0.001      | 32.2 | 1 | AAGGCTATACTTTTCAGGGATCATTTTTATAGCTTATTACTAGAGGAGTTAATGTGAATGTGTAGAGCACCAGAAACCTTGAGGAGGAGGTGCAGCGTTCTCTCCTGAGCATAAAGCTGGCCCAGTATTGTGTTGCCTCACTGCAACTGCCATTTGCCATTGATGATGATGTGTTCTCTTTCCTGAGAGAGTAAGAGGACAGGATGCATTCTAACTGGC |
| ex3_57          | CM000                                              | 14 | 0.009      | 28.2 | 1 | ATCTTTTCGTAGTTCATAAGTGTGATTGGGTTTTTACACGCATGTGTGAGATGTGCTT                                                                                                                                                                  |

|        |         |    |       |      |   |                                                             |
|--------|---------|----|-------|------|---|-------------------------------------------------------------|
| 30413_ | 677.2/4 |    |       |      |   | TCTTCAAAC TTTGTTACGATGTTGGCACATTATACATCTGACA                |
| x1     | 060731  |    |       |      |   |                                                             |
|        | 2-      |    |       |      |   |                                                             |
|        | 406072  |    |       |      |   |                                                             |
|        | 12      |    |       |      |   |                                                             |
| ex3_57 | ENST0   | 14 | 0.008 | 28.2 | 1 | AGGTGATTTCAAAAAGGACTTGTGGGCTGTGAATCCAGGCACTCAACACTTTGAAAG   |
| 30860_ | 000060  |    |       |      |   | TCT                                                         |
| x1     | 7153.1  |    |       |      |   |                                                             |
| ex3_57 | CM000   | 16 | 0.000 | 32.2 | 1 | ATCCTTTTGTAGTTCGTAAGTGTGATGATTGGGTTTGCACACGCATGTTTGAGATGTG  |
| 31149_ | 664.2/5 |    | 5     |      |   | CCTCCCTCAAACCTGTATTAGTCCATTTTACACAGCTA                      |
| x1     | 383982  |    |       |      |   |                                                             |
|        | 9-      |    |       |      |   |                                                             |
|        | 538397  |    |       |      |   |                                                             |
|        | 33      |    |       |      |   |                                                             |
| ex3_57 | CM000   | 14 | 0.009 | 28.2 | 1 | TTCCTGTTGGTTCCTAAGTGTGATGATTGGGTTTTTACATTCATGTGTGACATGTGCC  |
| 31938_ | 669.2/3 |    |       |      |   | TCCCTCAAATCTTGTGATGATGTGCGGCACGTGACCCATCTGACG               |
| x1     | 716977  |    |       |      |   |                                                             |
|        | 9-      |    |       |      |   |                                                             |
|        | 371696  |    |       |      |   |                                                             |
|        | 78      |    |       |      |   |                                                             |
| ex3_57 | AC091   | 14 | 0.008 | 28.2 | 1 | CUGCAGCCAAUUGAGUUGACCGAGCUCUUUUUCCUCCUGGGGGCUUGGUGUGCAA     |
| 32385_ | 826.3/1 |    |       |      |   | UGGCUGCAAACAGCAGAUUCCUUGGUAGUGUAUGCAGCCUGCUUCUUGUAUGGG      |
| x1     | 2688-   |    |       |      |   | UUGCCUCUAAGGGACCUUGAAGGCAGCC                                |
|        | 12823   |    |       |      |   |                                                             |
| ex3_57 | CM000   | 15 | 0.004 | 30.2 | 1 | ACAGACTCACTTTGCACCTGGCTGCAGCCTCATGGGGGTGCTTTTTCCATGTGCCAG   |
| 33029_ | 663.2/8 |    |       |      |   | GGAAACATTCTGGGGTGTGTGGCTGCCTGACCTATCAAGGGTGTGATGCAGCTGTCT   |
| x1     | 511919  |    |       |      |   | GGGATACAGGA                                                 |
|        | -       |    |       |      |   |                                                             |
|        | 851179  |    |       |      |   |                                                             |
|        | 5       |    |       |      |   |                                                             |
| ex3_57 | ENST0   | 15 | 0.003 | 30.2 | 1 | TCCTCACATGGGATAATTTTTACTTTATTCTCCCTTTGGAGGTCAGGTTAAACAAGAT  |
| 33226_ | 000045  |    |       |      |   | T                                                           |
| x1     | 9141.1  |    |       |      |   |                                                             |
| ex3_57 | ENST0   | 17 | 0.000 | 34.2 | 1 | ATAGCCAATCATTAGTATTCTGAGCTGTAGGAATCAAAGATTTTGATTAGATTCTGTAA |
| 34026_ | 000039  |    | 2     |      |   | C                                                           |
| x1     | 1082.1  |    |       |      |   |                                                             |
| ex3_57 | ENST0   | 16 | 0.000 | 32.2 | 1 | TCCACAGGTGAGATCATCCTTACCTGTTCTTCTTTTGGAGGGCAGAGTTCACGATG    |
| 35243_ | 000036  |    | 5     |      |   | ACT                                                         |
| x1     | 3321.1  |    |       |      |   |                                                             |
| ex3_57 | CM000   | 15 | 0.004 | 30.2 | 1 | AAGACTGTATTTTTCAGGGATCATGTCTATAGGTCATTTCTAGAGAAGCTTCTCTGAAC |

|                 |                                                    |    |       |      |   |                                                                                                                                                                    |
|-----------------|----------------------------------------------------|----|-------|------|---|--------------------------------------------------------------------------------------------------------------------------------------------------------------------|
| 35306_x1        | 665.2/1<br>090191<br>16-<br>109018<br>909          |    |       |      |   | ATTTAGGGCACAGGAAACCACGAGGAGGCGCAGCATTCTCTCCTGAGCATGGAACC<br>GGTGTGCTTCACTGCAACTGGCCGTTCAATTTGCTCTTGGTGATCATTCTCTCTTCC<br>TTTGGGAGAGGAATAGGGAGAGGACACAGTCGAGGA      |
| ex3_57_35751_x1 | ENST0<br>000039<br>0976.1                          | 14 | 0.009 | 28.2 | 1 | TTGGATATACGATAATCTCACTCCGACTTAACTCTCTCACTGATTATTTGATAATAAC<br>A                                                                                                    |
| ex3_57_36528_x1 | ENST0<br>000036<br>2600.1                          | 14 | 0.008 | 28.2 | 1 | ACACTCTCAGCTATGTATAGTTACACCTGGCTTCACTTGTGTGACTTTTGCAATGGGA<br>AG                                                                                                   |
| ex3_57_36556_x1 | ENST0<br>000045<br>9428.1                          | 21 | 5E-07 | 42.1 | 1 | ATCCTTTTGTAGTTCATGAGCATGATGATTGGGTGTTACGAGTGTGTGTGAGATGT<br>GCC                                                                                                    |
| ex3_57_37986_x1 | CM000<br>673.2/4<br>756645<br>-<br>475679<br>7     | 14 | 0.008 | 28.2 | 1 | ATTGCACGTTGTTGGAGCTTGGAGTTGGTGCTCTAACTGGCTGATAAACTTGCAAGT<br>GTAGGTAGTATGCTATGTGAGGGGCAAATTTTTTCAGTAACATGACAAAGGTCTTTGG<br>CCTAGTGAGTAGAGTTTGACAATAATCCTCGCTGCAAGT |
| ex3_57_39058_x1 | CM000<br>672.2/1<br>013719<br>52-<br>101371<br>852 | 15 | 0.003 | 30.2 | 1 | ATCCTTTTGTAGTTTGTAAGCATGACGATTGGGTTTTTCAGCCTCATGTGTGAGGTGTG<br>CCTCCCTCAAACCTTGTTACATAGGCACATTACCTGTCTGGCA                                                         |
| ex3_57_39848_x1 | CM000<br>668.2/4<br>183285<br>4-<br>418329<br>93   | 15 | 0.005 | 30.2 | 1 | TGCATTGCCATGGTATCTGCACTCAGTAGTTTATTCCTGCTGGGTGTCCAAAGATCA<br>GTGCCATAGAAATTCAGTATCTAGCATCACTGATTTTCTTGGCTTTGTGCTTGTTAAAA<br>CTTGGTATTTCTATTGACACAGTA               |
| ex3_57_39996_x1 | CM000<br>666.2/1<br>760981<br>63-<br>176098<br>285 | 18 | 5E-05 | 36.2 | 1 | GCCCTCCTGGTGCTTACCACAGGCTGTGTTCTTCACTGACTGTATAGAATGAGAAG<br>GTAGAATAAATCTACCCCATATGCACTTCAGCCCAACTGAAGTGTGTTGTTCTGGG<br>CCAAAAAGA                                  |
| ex3_57_40379_x1 | AC093<br>157.2/1                                   | 15 | 0.006 | 30.2 | 1 | AUGGUUUGGGAAAGGCUCUUGUGUUGUUGAACCUGCUCAGUUGUGGGUGCAGC<br>CUUGUACCAGGCAGCCCAACCCUGACCUAAAGUAAAUUCCAGGAAAAGUCUUUC                                                    |

|                  |                                |    |            |      |   |                                                                                                                                                                                                                                                  |
|------------------|--------------------------------|----|------------|------|---|--------------------------------------------------------------------------------------------------------------------------------------------------------------------------------------------------------------------------------------------------|
| x1               | 50637-150823                   |    |            |      |   | CUAGGUUGUGAAUUJGCAGUAAUAGGUGUGUGCAUCCUAGCAGCAGUUUGAUGA<br>UCAUGUAUGAAACUGCAAACAGGA                                                                                                                                                               |
| ex3_57<br>41783_ | ENST0<br>000038                | 21 | 0.000<br>2 | 34.2 | 1 | CTGTGAATATTCTCTGTGTTCTGATTATGTGAGAGCCAGGACAGGCTAAACATTTGCT<br>AC                                                                                                                                                                                 |
| x1               | 4174.1                         |    |            |      |   |                                                                                                                                                                                                                                                  |
| ex3_57<br>42997_ | CM000<br>682.2/1               | 15 | 0.005      | 30.2 | 1 | ATCCTTTTGTAGTTCGCGTGACGATGGGGTGTTCACACGCATGTGTGAGATGTGCCA<br>CCCTTGAACCTTGTTATGATGTCGTACATTACCCATCCAACA                                                                                                                                          |
| x1               | 834689<br>8-<br>183469<br>97   |    |            |      |   |                                                                                                                                                                                                                                                  |
| ex3_57<br>43286_ | ENST0<br>000036                | 14 | 0.009      | 28.2 | 1 | AGATAACTTCAAAGAGGGCTTGCGGAGCTGCAAACCAAGAGCTTTTAATGTATTACT<br>GA                                                                                                                                                                                  |
| x1               | 2326.1                         |    |            |      |   |                                                                                                                                                                                                                                                  |
| ex3_57<br>43685_ | AJ6094<br>45.1/1-              | 40 | 7E-18      | 79.8 | 1 | UGCACUUAUGUAUGUUUUUGUUUAACGUGGACAAAGACUACAGAUAGGUGCAAA<br>AAAUAAAUCCUCUUUUUGCAACCCAGAACUCAUUGUUCAGUAUGAGUUUUGAUACAU<br>AUAAGAAGGGAUUAU                                                                                                           |
| x1               | 126                            |    |            |      |   |                                                                                                                                                                                                                                                  |
| ex3_57<br>43992_ | CM000<br>664.2/2               | 16 | 0.001      | 32.2 | 1 | AAGCCTATGCATTCTGGGATCATTTTCGATAGCTCGTTCCTGGAGAAGTTTCTCTGAG<br>CACCAGAAGCCACAAGGAGCAGGCCAGCATTCCCTCCCGAGCAGGCCAGCGTT<br>CCCTCCCGAGCAGGAGCCGTCTGTGTTGCTTCCCTGCAAGTACCATTGCGCCAC<br>TGATGACCATTCTTCTGTTCTCTGGGAGAGTAAGAGGGAGAGGATGTAGTCTGAGA<br>GGT |
| x1               | 402892<br>16-<br>240289<br>443 |    |            |      |   |                                                                                                                                                                                                                                                  |
| ex3_57<br>44068_ | ENST0<br>000062                | 15 | 0.002      | 30.2 | 1 | GCGCTGCCTTTGTACCCACCGTGCCTCCGCCTGGTGTCTGGGGTCAGGTTGCAGT<br>GCCA                                                                                                                                                                                  |
| x1               | 7561.1                         |    |            |      |   |                                                                                                                                                                                                                                                  |
| ex3_57<br>45265_ | CM000<br>674.2/1               | 25 | 0.000<br>2 | 34.2 | 1 | TTTAGGAACAGCCTTTGAGGAAGCCTGTGTTTGTAGGGACATCTGAGAGTGTTGATG<br>AATGCCAACGGCTCTGATGGAAAAA                                                                                                                                                           |
| x1               | 073747<br>47-<br>107374<br>829 |    |            |      |   |                                                                                                                                                                                                                                                  |
| ex3_57<br>45395_ | CM000<br>663.2/4               | 17 | 0.000<br>2 | 34.2 | 1 | TCTCGTGATGAAAACCTCTGTCCAGTTCTGCTACTGAAGGGAGAGAGATGAGAGCCTT<br>TTAGGCTGAGGAA                                                                                                                                                                      |
| x1               | 477784<br>3-<br>447779<br>12   |    |            |      |   |                                                                                                                                                                                                                                                  |
| ex3_57<br>46101_ | CM000<br>666.2/6               | 15 | 0.002      | 30.2 | 1 | ATTTTCATGTTTTAAAGGCATAATGATGTCACTGACTGGCTGATGAAATCCCAAGCGTA<br>GGTAGTATGCTACATGAGGGGTGAGTTTTTTGCTAACACCACAAAGGTCTCTGGCCC                                                                                                                         |

|                  |                                |    |       |      |   |                                                                                                               |
|------------------|--------------------------------|----|-------|------|---|---------------------------------------------------------------------------------------------------------------|
| x1               | 774723                         |    |       |      |   | AATGAGTGGAGTTTGATAGGAGTTCTTGTGACAAGT                                                                          |
|                  | 6-<br>677473<br>86             |    |       |      |   |                                                                                                               |
| ex3_57<br>46491_ | ENST0<br>000039                | 14 | 0.009 | 28.2 | 1 | AAGACTGTAGTTTCAGGGATTGTTTCTATAGTTTGCTACTAGAGAAGTTTCTCTGAAC<br>GT                                              |
| x1               | 0880.2                         |    |       |      |   |                                                                                                               |
| ex3_57<br>47265_ | ENST0<br>000057                | 14 | 0.008 | 28.2 | 1 | CTGCAGACAGTTAAGCCAACTGAGTTCCTTTCTCAGGGAGGCCAGTGACAATGG<br>CTG                                                 |
| x1               | 8836.1                         |    |       |      |   |                                                                                                               |
| ex3_57<br>48112_ | ENST0<br>000036                | 31 | 3E-10 | 54   | 1 | TGGACCAATGATGAGTACCATGGGGTATCTGAAACAGGATTTTTGATTAAACCCATAT<br>GC                                              |
| x1               | 4802.1                         |    |       |      |   |                                                                                                               |
| ex3_57<br>48446_ | CM000<br>665.2/1               | 15 | 0.005 | 30.2 | 1 | ATCCTTTTGCAATTCATGAGCATGATGATGTGGTATCACACTTACGTGTGAGATGTGC<br>CTCCCTCAAACCTTCTTCTACAGGTTGGCACTTTGCCACCTGACA   |
| x1               | 500778<br>31-<br>150077<br>727 |    |       |      |   |                                                                                                               |
| ex3_57<br>48469_ | ENST0<br>000036                | 18 | 9E-05 | 36.2 | 1 | CTGCAGCTAGTTAACCTGACTTGTCCACCTCCCTGCTGGGGGCTCAGTGTGCAATG<br>GTTG                                              |
| x1               | 4506.1                         |    |       |      |   |                                                                                                               |
| ex3_57<br>48547_ | ENST0<br>000036                | 14 | 0.009 | 28.2 | 1 | TGCTGGAGTGATGAAAAAGTATCTTCAGGTGTGGCTGTGGCCACCTTGGCCACCTGT<br>GTG                                              |
| x1               | 4139.1                         |    |       |      |   |                                                                                                               |
| ex3_57<br>48717_ | CM000<br>679.2/5               | 16 | 0.001 | 32.2 | 1 | CTGTATTTGTAGTTCATGAGCATGGTATTGGGTGTTTCATGCAGGTGTGTGAGATAT<br>GCCACCCTTGAACCTTGTTACAACACTGGCACATTCTCAGACCTGAAA |
| x1               | 109827<br>8-<br>510981<br>74   |    |       |      |   |                                                                                                               |
| ex3_57<br>48762_ | CM000<br>678.2/2               | 14 | 0.008 | 28.2 | 1 | ATCTTTTTGTAGTTCATAAACGTGATGACTGTGTTTCCATGCTCATGCGTGAGTTGCA<br>CCTCCCTCAAACCTTGTTTTGACATTGACACATTATCTGCCTGATG  |
| x1               | 906635<br>8-<br>290662<br>55   |    |       |      |   |                                                                                                               |
| ex3_57<br>48848_ | ENST0<br>000036                | 23 | 0.003 | 30.2 | 1 | AGGCCATTTTAAAGAGGGCTCATGGGACTATGAAACCAAGAGCTCTTAATGCTGTGA<br>CCA                                              |
| x1               | 5507.1                         |    |       |      |   |                                                                                                               |

|                        |                                                    |    |            |      |   |                                                                                                                                                                             |
|------------------------|----------------------------------------------------|----|------------|------|---|-----------------------------------------------------------------------------------------------------------------------------------------------------------------------------|
| ex3_57<br>49319_<br>x1 | CM000<br>669.2/5<br>226956<br>9-<br>522694<br>37   | 14 | 0.008      | 28.2 | 1 | TCCATCTGTTTGGCAGACCTGGAGCAGTTAGTGTCTGCTGCTAAGGTTTCCATTACA<br>GATGTGAGAAAAAAGTGTCTTCTGCTTTCTGTCTGTCTCAGTGGCAACCAAGATT<br>GAATGGGGGATATGAGAG                                  |
| ex3_57<br>51738_<br>x1 | CM000<br>674.2/7<br>568930<br>5-<br>756891<br>43   | 15 | 0.002      | 30.2 | 1 | TTCCATTTTCAGAAAGCCGAGGTCAAATAATGAGTCCTGGGGAATTCAAACCTTGTGTT<br>AAGAAAATGTGTCCCAGTGTGCAATGGCTGCAAACAGCAGCTTCCTTGGTAGTGTAT<br>GCAGCCTGTTTGTGTACGGGTTGCTCTAAAGGGCCTTGGAGACAGTC |
| ex3_57<br>52429_<br>x1 | ENST0<br>000040<br>8532.1                          | 15 | 0.003      | 30.2 | 1 | GGGGTGTGCTCAGAGCAGGGGGCCTGAAGAATGCTTCTTCTGTTTACAACACACCC<br>AATA                                                                                                            |
| ex3_57<br>52930_<br>x1 | CM000<br>676.2/1<br>023743<br>19-<br>102374<br>238 | 20 | 2E-06      | 40.1 | 1 | AAGGCTGTGCTTTCTGGGATCATTCTATAGTTCATTAAGTACTAGAGAAGTTTCTCTGAAT<br>GTGTAGAGCAAAGAAAAAATATT                                                                                    |
| ex3_57<br>55737_<br>x1 | CM000<br>685.2/1<br>428740<br>63-<br>142873<br>960 | 17 | 0.000<br>1 | 34.2 | 1 | GTAATTTTCGTAGTTCATAAGCATGATGATTGGGTGTTACACACATGCGTGAGATACG<br>CCACCCTCCCACCTTGTTAAGATGTTGGCACATAACCCGTCTTACA                                                                |
| ex3_57<br>56298_<br>x1 | CM000<br>677.2/2<br>510157<br>5-<br>251016<br>66   | 20 | 2E-06      | 40.1 | 1 | GGATCGATGATGACTTAAAGATTTATCTAATTTAAATCTGAACAAAATGAGTGACCAA<br>AACACTTCTGTACCACTTCTGTGAGCTGAGGTCC                                                                            |
| ex3_57<br>56741_<br>x1 | ENST0<br>000040<br>8571.1                          | 16 | 0.001      | 32.2 | 1 | GCAGACTCCCTCAGCATCCAGCGGGTGCTTTTTCGGTCTGCCAGTGAGCATTCCATG<br>GTG                                                                                                            |
| ex3_57<br>57759_<br>x1 | AF250<br>841.1/1<br>59716-<br>159797               | 14 | 0.009      | 28.2 | 1 | GGGUCGAUGAUGAGAACCUUAUUAUUGUUCUGAAGAGAGGUGAUGACUAAAAAUC<br>AUGCUCAAUAGGAUUACGCUGAGGCC                                                                                       |

|                        |                                                    |    |            |      |   |                                                                                                                                              |
|------------------------|----------------------------------------------------|----|------------|------|---|----------------------------------------------------------------------------------------------------------------------------------------------|
| ex3_57<br>58131_<br>x1 | ENST0<br>000036<br>3666.1                          | 15 | 0.005      | 30.2 | 1 | AAGTCATTTCAAAGAGGGCTTGGATGGCTATGAAACCAGAGCTCTTAAGGTTATAATA<br>AG                                                                             |
| ex3_57<br>59026_<br>x1 | ENST0<br>000036<br>3280.1                          | 16 | 0.000<br>7 | 32.2 | 1 | TGAATCAATGGTGACCACTGGTGGCATATAAGTCATGGATGATGAATATGAGAAGAA<br>AAG                                                                             |
| ex3_57<br>59263_<br>x1 | CM000<br>675.2/3<br>985722<br>7-<br>398571<br>35   | 15 | 0.004      | 30.2 | 1 | AGATTGATGATGGCACCCCCATAAAACCATTCCCTTAGGAAATCTGAACAAAATGAGTG<br>AAAACCTACTAGTTGTTCTCATTGAGGCTGGGCC                                            |
| ex3_57<br>59630_<br>x1 | ENST0<br>000036<br>4595.1                          | 15 | 0.005      | 30.2 | 1 | AGCCTCCTGGTGCTCAGCACAGGATGTGTTCTTACCCTAACCAAATAGAAAGAGTAG<br>GCT                                                                             |
| ex3_57<br>61199_<br>x1 | AL132<br>709.5/1<br>85108-<br>185034               | 35 | 5E-15      | 69.9 | 1 | UGGACCAAUGAUGAGUACCAUGGGGUAUCUGAAACAGGAUUUUUGAUUAAACCCA<br>UAUGCAAUUCUGAGGUCCAU                                                              |
| ex3_57<br>61207_<br>x1 | ENST0<br>000038<br>4000.1                          | 14 | 0.008      | 28.2 | 1 | GGATCGATGATGAGTCCCCATAAAAACATTCCCTTGAAAAGCTGAACAAAATGAGT<br>GAG                                                                              |
| ex3_57<br>61645_<br>x1 | CM000<br>668.2/7<br>339401<br>3-<br>733939<br>13   | 18 | 0.008      | 28.2 | 1 | ATCCTTTTGTAAAGTCATAAGTGTGATTGGGTTTTTCATGCTCTTGTGTCAAATGTGCCT<br>CCCTCAAACCTTGTTACGAAGTGGGCACACTACCCACCTGATG                                  |
| ex3_57<br>61781_<br>x1 | ENST0<br>000040<br>8823.1                          | 18 | 6E-05      | 36.2 | 1 | GGGGTGCGCTCAGAGCAGAGGGCCTTAAGAATGGCTCCTCTGTTTACAACACACCCC<br>AACA                                                                            |
| ex3_57<br>62098_<br>x1 | ENST0<br>000051<br>6632.1                          | 21 | 0.000<br>3 | 34.2 | 1 | AGGGGTGGTCTCCTCCCTTACTCTTTGGGAACTCAGATTGGCCTTATGGTGGCCTCT<br>CTT                                                                             |
| ex3_57<br>62485_<br>x1 | CM000<br>674.2/1<br>035921<br>12-<br>103592<br>243 | 14 | 0.009      | 28.2 | 1 | TCATCAGATGGGATAACTTTTACCTGTTCCCTCTTTTGGAGGTTAGATTCTAATACGA<br>TGATTGAAGTTCGTATGATACGTGATTAATGTCTCTGCATAATCAGGACTTGTAACAC<br>CTTGATTGCTTCTGAT |

|                        |                                                    |    |            |      |   |                                                                                                                                                                                                                                                      |
|------------------------|----------------------------------------------------|----|------------|------|---|------------------------------------------------------------------------------------------------------------------------------------------------------------------------------------------------------------------------------------------------------|
| ex3_57<br>62661_<br>x1 | CM000<br>670.2/1<br>231805<br>25-<br>123180<br>310 | 16 | 0.000<br>6 | 32.2 | 1 | GAGACTATACTCTCAGTGACCAGTTCCTGAGTTCATTA<br>CTAGAGAAGTTTCTCTGAAC<br>GTGTAGAGCACGGGGAGCCAGGAGGGGAAGGTGAGCG<br>TTTTCTCCTGAGCATGAG<br>GTGGCTTTAGATATTGCTTCATGGCAATTTGGCAACT<br>GCCATGTGCCATTGAAGATG<br>GTTGTTATCTTCCTCTGGAAGAGGAAGAGGACACAGT<br>CTGAGTGGT |
| ex3_57<br>63075_<br>x1 | ENST0<br>000041<br>1034.1                          | 14 | 0.009      | 28.2 | 1 | AGTTCCTTGGAAAGTTAAAGGTTAAGCTTAAGGACTG<br>ATTCAAAGGCAGGTGCAAAAA<br>ATA                                                                                                                                                                                |
| ex3_57<br>63126_<br>x1 | CM000<br>678.2/1<br>887026<br>9-<br>188701<br>66   | 15 | 0.004      | 30.2 | 1 | ATCCTTTTGTAAACATAAGCATAATGATTGGGTTTTT<br>ATTTTCACATGTTTGATATGC<br>CTCCCTCAAATCCTCTTATGATGTCAGCACATTACCC<br>ATCTGAGG                                                                                                                                  |
| ex3_57<br>65938_<br>x1 | CM000<br>665.2/1<br>014115<br>0-<br>101412<br>47   | 15 | 0.002      | 30.2 | 1 | GACTTTTTGTACTTTTATAAGCGTGATGATTGGGTGT<br>TCCCCTGTGAGATGCGCCACC<br>CTCGAACCTTGTTACGACGTCGGCACATTGCGCGTCT<br>GACA                                                                                                                                      |
| ex3_57<br>66165_<br>x1 | CM000<br>664.2/1<br>615585<br>44-<br>161558<br>646 | 15 | 0.005      | 30.2 | 1 | ACCCTTTTGTAGTTCATGAGCATGATGATTGGGTGTT<br>CACACACATGTGTGAAATGTG<br>CCACCCTCAACCTTATTATGAGGTCAGCACATTACCC<br>ATCTGACA                                                                                                                                  |
| ex3_57<br>66245_<br>x1 | AC002<br>069.2/2<br>1330-<br>21191                 | 15 | 0.002      | 30.2 | 1 | AUCCAAGGCGAUUCCCUCUCCAAGGGGACAUCUAGUG<br>CCCCUCUCAGGAAAGUAG<br>CAACUUGGAAUAGAAUCUGGCAUGCCUAAGGUCUUU<br>GAGGAACAGGGAUGCUUUA<br>UCCUCUGCCUUCUUGGCUGCCUACAUAAG                                                                                          |
| ex3_57<br>66252_<br>x1 | CM000<br>681.2/5<br>166940<br>5-<br>516695<br>08   | 16 | 0.001      | 32.2 | 1 | ATCCTTTTGTAGTTCATAAGTGTGAGGACTGGGTTTT<br>CAGGCTCGTGTATAAGATGTG<br>CCTCCCTCACTCCTTGTTACAACATCGGCATATTACT<br>CATCTGAAT                                                                                                                                 |
| ex3_57<br>66280_<br>x1 | ENST0<br>000036<br>4937.1                          | 15 | 0.004      | 30.2 | 1 | TACCCTCTTCCACTTTGCCAACTGGATGTATGTCTTT<br>ACTGGTCATTCCAGTGGGGC<br>AA                                                                                                                                                                                  |

|                        |                                                    |    |            |      |   |                                                                                                                                                                                                                                       |
|------------------------|----------------------------------------------------|----|------------|------|---|---------------------------------------------------------------------------------------------------------------------------------------------------------------------------------------------------------------------------------------|
| ex3_57<br>67215_<br>x1 | AC020<br>553.4/1<br>38195-<br>138051               | 16 | 0.000<br>6 | 32.2 | 1 | AAUCUCCUGGGAUUGUGUCUGGCGAGUGCCCAGUAUUCUGCCACCUUCAGAAGG<br>AAGGGAAAGCAAACCUUCAUGAAAGCAGAGGCAUUCUCCAUUCCCAGCUUGCU<br>CCAGAUCUGGCAGUUGGAAGACAUCUGCAACAAUG                                                                                |
| ex3_57<br>67841_<br>x1 | ENST0<br>000062<br>0104.1                          | 15 | 0.002      | 30.2 | 1 | AAAAAAGTGTCTTGAGCTTTCTGTCTGATTGTGGCAGCCAAGATTGAATAGAGGA                                                                                                                                                                               |
| ex3_57<br>68772_<br>x1 | CM000<br>678.2/8<br>245432<br>0-<br>824544<br>32   | 15 | 0.006      | 30.2 | 1 | ATCCTTTTGTGGTTCCTAAGTGTGATGATTGGGTTTTTCATACTCATGTGTGAAATGTA<br>CCTCCCTCAAGCCTTGTTATGATGTGGCGGGCACATTACCCTTACCCATCTGATG                                                                                                                |
| ex3_57<br>69232_<br>x1 | AF067<br>020.1/9<br>80-<br>1114                    | 14 | 0.008      | 28.2 | 1 | CGGCAAACAGUUAUCCCCUUCUAGUCUGGCUCUCCUGGGAACUCUAGAAGGGAAUC<br>AGUCUGCCACAAGUAAGUGGGUGAAUUCUUCUGUCCACGUCAGUAUUUUGAUGG<br>GUNGCUUNAAAACUUGCCAGAUAAACC                                                                                     |
| ex3_57<br>69288_<br>x1 | ENST0<br>000036<br>4263.1                          | 15 | 0.003      | 30.2 | 1 | CTATCAAAAAGTTACTTTTTGTGGGGTGAAGTTTTTAAAATAACCTTTACCTACGTGG<br>GC                                                                                                                                                                      |
| ex3_57<br>70659_<br>x1 | CM000<br>676.2/1<br>011456<br>95-<br>101145<br>480 | 14 | 0.008      | 28.2 | 1 | AAGACTATACTTTCAGGGATCATTCTATAGTTTCATTACTAGAGAAGTTTCTCTGAATG<br>TG TAGAGCACCAGAACTATGAGGAGGAGGCACAGAGTTCTCTCCTGAGCATGAAG<br>CTGGCACTTGGTGTGCTTTGCTGTCAGCTGCCACTTACCATTGGTGATTGTTCTTGTC<br>TTCCTCTTGGAGAGTAAGAGAAAAGAGAATGCAGTCTGAGAGGT |
| ex3_57<br>72395_<br>x1 | CM000<br>670.2/1<br>036652<br>95-<br>103665<br>394 | 15 | 0.003      | 30.2 | 1 | ATTCTTTCATAGTTCATAAGTGTGATTGGGTGTTTAAACGCTCATTGAGATGTTCCCTCC<br>CTCAAACCTTGGTATTATGTTTGCACATTACACATCTGATG                                                                                                                             |
| ex3_57<br>72451_<br>x1 | ENST0<br>000045<br>9301.1                          | 15 | 0.002      | 30.2 | 1 | ATCCTTTTGTAGTTCATAGCATGATGATTGGGTGTTACATGCATGTGTGAAATGTGC<br>CA                                                                                                                                                                       |
| ex3_57<br>72531_<br>x1 | CM000<br>663.2/1<br>126525<br>88-<br>112652        | 20 | 0.000<br>8 | 32.2 | 1 | ATCCTTTTGTAGTTCATAAGTGTGATGGTTGAGTTTTTACATGCATGTGTGAGATGTG<br>CCTCCCTCAAACCTTGTTATGTTGGCACATTACCTGTCTGACA                                                                                                                             |

| Gene            | Transcript                    | Length | Score  | Position | Count | Sequence                                                                                                                                                                                                                 |
|-----------------|-------------------------------|--------|--------|----------|-------|--------------------------------------------------------------------------------------------------------------------------------------------------------------------------------------------------------------------------|
| 688             |                               |        |        |          |       |                                                                                                                                                                                                                          |
| ex3_57_72642_x1 | ENST0000390832.1              | 15     | 0.006  | 30.2     | 1     | TACACTTGTTTATATTTTTGTTTAACTTGTGGACAAAGATTTATAGACAGGTGCAAAAA<br>A                                                                                                                                                         |
| ex3_57_72971_x1 | CM000664.2/88307360-88307463  | 15     | 0.004  | 30.2     | 1     | ATCCTTTTGCAGCTCATAAGTGTGATGATTGGGTTTTCACACTCATGTGTAAGATGTG<br>TTTCCCTCAAACCTTGCTATGATATCAGCACAGTACCTATCTGACA                                                                                                             |
| ex3_57_73859_x1 | ENST0000515993.1              | 14     | 0.009  | 28.2     | 1     | TTGCATCTATTTGACAGACTAGAATAATTACTATCTGCTGCTAAGGTTTCCCTGCAG<br>AT                                                                                                                                                          |
| ex3_57_74841_x1 | ENST0000391132.2              | 17     | 0.0004 | 34.2     | 1     | AAGACTATACTTTCAGGGATCATTCTATAGTTTATTACTGGAGAAGTTTCTTTGAATG<br>T                                                                                                                                                          |
| ex3_57_75429_x1 | CM000664.2/18394936-183949333 | 14     | 0.009  | 28.2     | 1     | ATCTTTTTGTGGTTCACAAGTGTGATGATTAGGTTTTTCAGACTCATGTGTGAGACATG<br>CCTTCCCTCAAACCTTCTTATGCTATCAGCACATAATCTGGCTGACA                                                                                                           |
| ex3_57_76340_x1 | CM000668.2/28015568-28015777  | 16     | 0.001  | 32.2     | 1     | AAGACTATACTTTCAGGGATCATTCTACATTTCCGGTAATTTCTTTGAACATGTGG<br>AGCACCGGAAACCACCAGGAGGAGGCACAGCATTCTCTGGAGCGTGAAGCCAGT<br>TCTTGGTGTGCTGCATAGCAACTGCCATTTGCCTTTGATGATCATTCTTTCTTTCTT<br>TAGGAGAATAAGAGGGGGAGAACCCAGTCTGAGGGAT |
| ex3_57_76546_x1 | CM000663.2/9082879            | 14     | 0.009  | 28.2     | 1     | ATGGTCTGGGGAAAGGCTCCTATGTTTTTGAACCTGCCAGTTGTGGGTGCAATCTT<br>GCACCAGGCAGCCCAACCCTGACCTAAAGTAAATCCCAGAAGTCTTTCTGGGTTT<br>TGAATTTGCAGTAACAGCTGTGGGCATTCTAGCAGCAGTTCGATGATCATGTATGGT<br>ACTGCAAACAGGA                        |
| ex3_57_76775_x1 | ENST0000384645.1              | 33     | 8E-14  | 65.9     | 1     | GGATCGATGATGACCTCAATACATGCATTCTTGGAAAGCTGAACAAAATGAGTGAA<br>AAC                                                                                                                                                          |
| ex3_57_79653_x1 | CM000680.2/2774846            | 14     | 0.009  | 28.2     | 1     | ATCTTGGTGGACTTGACTTTGAACAAGAATGCTTGTGATGATTGGGTGTTACGCAC<br>ATGCGTGAGATATGCCACCCTTGAACCTTGTTACTGTTGGCACATTACCTGTCTGA<br>CC                                                                                               |

|        |         |    |       |      |   |                                                             |
|--------|---------|----|-------|------|---|-------------------------------------------------------------|
|        | -       |    |       |      |   |                                                             |
|        | 277496  |    |       |      |   |                                                             |
|        | 3       |    |       |      |   |                                                             |
| ex3_57 | CM000   | 15 | 0.002 | 30.2 | 1 | AAGACTACACTTTTCAGGGATCCTTTCTTCAGTTCGTTACTAGAGGTTTCTCTGAATAT |
| 80561_ | 668.2/7 |    |       |      |   | GTAGAGCACCAGAAACCACTAGAAGGAAATGCAGTGTGCTCTCTCCAGAGTGTGAA    |
| x1     | 112710  |    |       |      |   | GCCAACCCTTGGTGTTGCTTGGCTGCAACTGCCGTTTACCATTGACAATTGTTCTCTT  |
|        | 5-      |    |       |      |   | CCTCAAGAAGAATGAGAGGGGAAAGAAGGCAGTCTGTGTGAT                  |
|        | 711268  |    |       |      |   |                                                             |
|        | 93      |    |       |      |   |                                                             |
| ex3_57 | ENST0   | 16 | 0.001 | 32.2 | 1 | CTACAATCAATTAAGCCACATGGGGCCTGGTGTGCAAGGGCTGCAAACAGCATCATC   |
| 80979_ | 000051  |    |       |      |   | CTA                                                         |
| x1     | 6324.1  |    |       |      |   |                                                             |
| ex3_57 | AC012   | 19 | 0.004 | 30.2 | 1 | CCCUAUUAUUCGAAAGUUAUCCUGGUCAUUGACAGUGCAGGGAGAGAAACUGCUGA    |
| 81082_ | 560.5/1 |    |       |      |   | AAGCAUUCUUUUUGGAGGGUCCACUCCUGUCCCUUCUAAACUCUGGAGUU          |
| x1     | 66192-  |    |       |      |   | UCCACA                                                      |
|        | 166076  |    |       |      |   |                                                             |
| ex3_57 | CM000   | 15 | 0.004 | 30.2 | 1 | ATCCTTTTGAAGTTCATAAGCATGGTATTGGGTTTTTCACTCATGTGTGAGATGTA    |
| 81240_ | 674.2/6 |    |       |      |   | CCACCCTTAAAGCTTGTTATGATGTAGGCACATTACCCATCTGACA              |
| x1     | 435586  |    |       |      |   |                                                             |
|        | 5-      |    |       |      |   |                                                             |
|        | 643557  |    |       |      |   |                                                             |
|        | 62      |    |       |      |   |                                                             |
| ex3_57 | CM000   | 15 | 0.006 | 30.2 | 1 | TGTTTAATGACTAAGGAAGTCCCTGTCCCCGCCAGGGGCTGTGAGCAACACCATG     |
| 81982_ | 680.2/2 |    |       |      |   | GCTGCCCCAGGGCTGGCCAATTGGGCAGATGCCAGGGGCTGAGAACA             |
| x1     | 145075  |    |       |      |   |                                                             |
|        | 6-      |    |       |      |   |                                                             |
|        | 214506  |    |       |      |   |                                                             |
|        | 53      |    |       |      |   |                                                             |
| ex3_57 | CM000   | 15 | 0.002 | 30.2 | 1 | AAGACTAAACTTTTCAGGGGTCATTTCTATAGTTCATTACTAGAGAAGTTTCTCTGAAT |
| 82735_ | 664.2/1 |    |       |      |   | GTGTGGAAAAATAAGTCAAT                                        |
| x1     | 647463  |    |       |      |   |                                                             |
|        | 12-     |    |       |      |   |                                                             |
|        | 164746  |    |       |      |   |                                                             |
|        | 389     |    |       |      |   |                                                             |
| ex3_57 | ENST0   | 14 | 0.008 | 28.2 | 1 | TCCTCGCATGGGATAATTTTTACTTTATTCTCCCTTTGGAGGTCAGGTTAAACATGA   |
| 83377_ | 000045  |    |       |      |   | TT                                                          |
| x1     | 9095.1  |    |       |      |   |                                                             |
| ex3_57 | CM000   | 14 | 0.008 | 28.2 | 1 | ATCTTTTTGTAGTGTAAGTTTGATCATTGGATTTTCATGCTCACGTGTGATACGTGCCT |
| 84277_ | 672.2/6 |    |       |      |   | CCTTCAAACCTTGTTATGACACTAGCACATTATTCATATGACA                 |
| x1     | 661533  |    |       |      |   |                                                             |

|                        |                                                          |    |       |      |   |                                                                                                                                                                                                                                    |
|------------------------|----------------------------------------------------------|----|-------|------|---|------------------------------------------------------------------------------------------------------------------------------------------------------------------------------------------------------------------------------------|
| ex3_57<br>84380_<br>x1 | 8-<br>666152<br>37<br>CM000<br>675.2/1<br>987518         | 15 | 0.003 | 30.2 | 1 | ATCCTTTTGGAGTTCATGAGTGTGAGAACTGGGTGTTACCCGCATGTGTGAGATGT<br>GCCACCCGCAAACCTTGTTATGACATCAGCACATTACTGAAA                                                                                                                             |
| ex3_57<br>84751_<br>x1 | 7-<br>198752<br>85<br>CM000<br>676.2/3<br>130652         | 15 | 0.004 | 30.2 | 1 | AAGACTCTACTTTCAGGGATCATTCTATAGTTCATTACTAGGGAAGTTTCTCTCAATG<br>TG TAGAGCACAAAAAGTAAAT                                                                                                                                               |
| ex3_57<br>84769_<br>x1 | 0-<br>313066<br>00<br>CM000<br>676.2/5<br>084462         | 14 | 0.008 | 28.2 | 1 | TGAGTTTTGGGATGAGACCCTGGAATAAGTGCTGGACACAGTGCCTGAATCAGACTG<br>TGGAAATATTAATGTATTTTATTTTACTTA                                                                                                                                        |
| ex3_57<br>85262_<br>x1 | 5-<br>508447<br>12<br>CM000<br>664.2/3<br>075772         | 15 | 0.004 | 30.2 | 1 | ATCCTTTTGTGATTCATAAGCGTGATGATTGGGTTTTTCATGCTCATGTGTGAGATATG<br>CCTCTCTCAAGCCTTGTTACAACATCACATTACCTGTCTGATG                                                                                                                         |
| ex3_57<br>85399_<br>x1 | -<br>307567<br>2<br>AC023<br>490.5/1<br>21842-<br>121984 | 14 | 0.009 | 28.2 | 1 | UUCUCAGGUCGCCAGUGCAGCCCCAAGAUGAGCCUGCAGUAUUUUCCUUACAUGA<br>UCUGGUCCUACUGUGGGCAGCGCUGCUGCCCAGAGCCUGAGAGGAUUAUGAAAA<br>CAUGGCAACGGAAGUGAGGCCAGGGGACACAGCA                                                                            |
| ex3_57<br>85404_<br>x1 | AL591<br>067.35/<br>160576                               | 16 | 0.001 | 32.2 | 1 | UGGUCAUUACCAAGGCUUUUJAGAAUGCAGUUUCUCAUUUGCUGUGGACAUGACCA<br>UAAAGAAAAUUCCAUGAGGUUUUUAUUAUGCUACUUGACUAGCAGUUAACCGU<br>UUGGGAACACGU                                                                                                  |
| ex3_57<br>87420_<br>x1 | -<br>160455<br>CM000<br>677.2/5<br>876068<br>1-          | 16 | 0.001 | 32.2 | 1 | AAGACTATACTTTCAGGGATCATTGTATAGTTCGTTACTAGAGAATTTTCTCTGAATG<br>TG TAGAACACCAGAAACCACAAGGAGGAGGCGCAGCGTTCTCTCCTGAGCGTGAAG<br>CCGGGTCTGGTGTGCTTCACTGCAACTGCCATTTGCCATTGATGATTGTTCTTCTC<br>TTCTTTGGGAGAGTAAGAGGGCAAAGGATGCAGTCTGAATGGT |

|        |         |    |       |      |   |                                                             |  |
|--------|---------|----|-------|------|---|-------------------------------------------------------------|--|
|        | 587604  |    |       |      |   |                                                             |  |
|        | 66      |    |       |      |   |                                                             |  |
| ex3_57 | CM000   | 15 | 0.003 | 30.2 | 1 | TTCTTACAAATCTAAATGTGCTTTGATGCAAGTATATTTGAATCCCTTTCCATCTGATA |  |
| 87442_ | 679.2/1 |    |       |      |   | ACTGAGCAAATAATA                                             |  |
| x1     | 894399  |    |       |      |   |                                                             |  |
|        | 9-      |    |       |      |   |                                                             |  |
|        | 189440  |    |       |      |   |                                                             |  |
|        | 73      |    |       |      |   |                                                             |  |
| ex3_57 | CM000   | 14 | 0.009 | 28.2 | 1 | ATCCTTTTGTGGTTCATAAGCATGATGATTGGGTTTTTCATGCTGTGTGAGGTGTGCCT |  |
| 87872_ | 663.2/1 |    |       |      |   | CCCTCAGACCTTGTTATGACATTAGTATATTACCTGTCTGACA                 |  |
| x1     | 591089  |    |       |      |   |                                                             |  |
|        | 7-      |    |       |      |   |                                                             |  |
|        | 159109  |    |       |      |   |                                                             |  |
|        | 97      |    |       |      |   |                                                             |  |
| ex3_57 | AC009   | 16 | 0.000 | 32.2 | 1 | UGGCAUGAUUUCCUGCAGGUUGAGCUCAGCCAAGUACCACCCUCAGUAAGCCUA      |  |
| 88367_ | 228.4/5 |    | 9     |      |   | GAGUAGAGGGGCCUGACAUCCUUUCCUUAAAUAACAAGGAGCCUUAUCCAGGU       |  |
| x1     | 9361-   |    |       |      |   | UGUCCUAGUCUCAUACUU                                          |  |
|        | 59234   |    |       |      |   |                                                             |  |
| ex3_57 | ENST0   | 15 | 0.005 | 30.2 | 1 | GCATGGTAGTGGGTTTCATTGGGGGCCCTTCTCTGTGGGCCTCATAGCGTACCCATG   |  |
| 88494_ | 000038  |    |       |      |   | CCAG                                                        |  |
| x1     | 4771.1  |    |       |      |   |                                                             |  |
| ex3_57 | CM000   | 15 | 0.005 | 30.2 | 1 | ATCCTTTTGTAGTTTTTAAGTGTCATGATGGGGTGTCCATGCACATGTGTAAGATGTG  |  |
| 90276_ | 677.2/5 |    |       |      |   | CCACTCTTGAAGCTTGTTACAACATGGGCAGATTACCAATCTCACA              |  |
| x1     | 595580  |    |       |      |   |                                                             |  |
|        | 4-      |    |       |      |   |                                                             |  |
|        | 559557  |    |       |      |   |                                                             |  |
|        | 01      |    |       |      |   |                                                             |  |
| ex3_57 | CM000   | 14 | 0.008 | 28.2 | 1 | ATCCTTTTGTGGTTC AAGAGCGTGATGATTGGGTTTTACGCTCATGTGTGAGAAGT   |  |
| 90404_ | 669.2/2 |    |       |      |   | GCCTCCCTCGAATCTTGTTATGACTCCATGTTGGCAAATTATGTCTGAAG          |  |
| x1     | 389513  |    |       |      |   |                                                             |  |
|        | 4-      |    |       |      |   |                                                             |  |
|        | 238950  |    |       |      |   |                                                             |  |
|        | 28      |    |       |      |   |                                                             |  |
| ex3_57 | CM000   | 15 | 0.003 | 30.2 | 1 | GACTTCTCACTGAGCTTCTTTCTGTCTGTTGCTGGCAGCTTATGGATTCATATGAGCA  |  |
| 90544_ | 666.2/7 |    |       |      |   | GAGAGAATCACAGA ACTAGCATTACTTTTGTCTTTACAGGAGTATATTTGGCTGTCTT |  |
| x1     | 984310  |    |       |      |   | GTGAGATATTA                                                 |  |
|        | 2-      |    |       |      |   |                                                             |  |
|        | 798432  |    |       |      |   |                                                             |  |
|        | 28      |    |       |      |   |                                                             |  |
| ex3_57 | ENST0   | 15 | 0.008 | 30.2 | 1 | ATAAACAAAAGAACACCAATTGTGCTCCTTTCCTCCTGGGGCCAGTGCAATGGC      |  |

|        |         |    |       |      |   |                                                              |
|--------|---------|----|-------|------|---|--------------------------------------------------------------|
| 91198_ | 000036  |    |       |      |   | TGC                                                          |
| x1     | 5509.1  |    |       |      |   |                                                              |
| ex3_57 | ENST0   | 14 | 0.009 | 28.2 | 1 | AGGTCATTTCAAAGAAGGTTACAGTGGCTGTGAGACCAAGAACGCTTAATGCTGTTA    |
| 92609_ | 000051  |    |       |      |   | CCA                                                          |
| x1     | 6741.1  |    |       |      |   |                                                              |
| ex3_57 | ENST0   | 23 | 4E-08 | 46.1 | 1 | TGGACCTATGATGATGACTGGTGGCGTATGAGTCATTGACGGTGAATACAGGTCTGG    |
| 94453_ | 000036  |    |       |      |   | AAG                                                          |
| x1     | 2705.1  |    |       |      |   |                                                              |
| ex3_57 | ENST0   | 15 | 0.003 | 30.2 | 1 | TGAACTAGTGGTGGTGGCTTGTGGCATATTTAGTCACAGATGATGAATAAATACATGC   |
| 95125_ | 000036  |    |       |      |   | CT                                                           |
| x1     | 2520.1  |    |       |      |   |                                                              |
| ex3_57 | ENST0   | 15 | 0.003 | 30.2 | 1 | TCCACATTCTAAAAACAATCCACTCTGTGAGGTGCAACAGTTAATAGCATGTTAGAGT   |
| 96057_ | 000051  |    |       |      |   | TC                                                           |
| x1     | 6475.1  |    |       |      |   |                                                              |
| ex3_57 | CM000   | 15 | 0.005 | 30.2 | 1 | AAGACTATGCTTTTCAGGGATCATTTCTACAGTTTGTTACTAGAGAATTTCTCTGAACAT |
| 96325_ | 663.2/1 |    |       |      |   | GTAGTTTTCAAAAAAAAAATTAGATT                                   |
| x1     | 240925  |    |       |      |   |                                                              |
|        | 1-      |    |       |      |   |                                                              |
|        | 124091  |    |       |      |   |                                                              |
|        | 68      |    |       |      |   |                                                              |
| ex3_57 | ENST0   | 14 | 0.008 | 28.2 | 1 | ATGCATCTATTTGACAGACCTGGAACAGTTATTTTTTGGCCACTAAGATTTCTACTACAG |
| 96805_ | 000051  |    |       |      |   | A                                                            |
| x1     | 6241.1  |    |       |      |   |                                                              |
| ex3_57 | CM000   | 16 | 0.000 | 32.2 | 1 | ATCTTCTGTAGTTCATCAGTATGATACCTGGGTGTTTCACACACATGTGAGATGAGTC   |
| 96864_ | 665.2/4 |    | 8     |      |   | ATTCTTGAACCTTGTTATGATGTCAGCACTACCCATCTAACC                   |
| x1     | 746634  |    |       |      |   |                                                              |
|        | 9-      |    |       |      |   |                                                              |
|        | 474664  |    |       |      |   |                                                              |
|        | 48      |    |       |      |   |                                                              |
| ex3_57 | ENST0   | 15 | 0.004 | 30.2 | 1 | CCAACATGGATAGTCTGGGAGGTCCTCTCCCCAGGCTCTGTGGAAGTGGTGTGG       |
| 98067_ | 000036  |    |       |      |   | GGAG                                                         |
| x1     | 2342.1  |    |       |      |   |                                                              |
| ex3_57 | CM000   | 14 | 0.008 | 28.2 | 1 | ATCCTTTGTAGTTAATAACATGATGATTGTGTTTTCACACTCTCGTGTGAGATATGCCT  |
| 98322_ | 680.2/3 |    |       |      |   | CCCTCAAATCTTGGCACATTACCCATCTGACA                             |
| x1     | 424349  |    |       |      |   |                                                              |
|        | -       |    |       |      |   |                                                              |
|        | 342425  |    |       |      |   |                                                              |
|        | 9       |    |       |      |   |                                                              |
| ex3_57 | ENST0   | 15 | 0.002 | 30.2 | 1 | GGATCGATGATGACTTTTATACATGCATTCCTTGGAAAGCTGAACAAAATGAGTGAAA   |
| 99681_ | 000038  |    |       |      |   | AC                                                           |

|                 |                                  |    |       |      |   |                                                                                                                                                                                                                 |  |
|-----------------|----------------------------------|----|-------|------|---|-----------------------------------------------------------------------------------------------------------------------------------------------------------------------------------------------------------------|--|
| x1              | 4549.1                           |    |       |      |   |                                                                                                                                                                                                                 |  |
| ex3_58_00284_x1 | ENST0000516178.1                 | 15 | 0.003 | 30.2 | 1 | GTGTGGGATGTGTGTCTAAACACGACAATCTGAAGACAGAGGTGTAGAAATTGGCAAGTT                                                                                                                                                    |  |
| ex3_58_00831_x1 | AL132709.5/169743-169666         | 15 | 0.004 | 30.2 | 1 | GGGACCAAUGAUAAUGACUGUUGGGGUAUGAGUCAGUGAGGUUGAAUAACAGUUUGUAUCUGGAAAUCUGAGGUCCAA                                                                                                                                  |  |
| ex3_58_01402_x1 | CM000663.2/51724896-51724775     | 19 | 0.007 | 30.2 | 1 | GTGCCCTTTTAAGGTTGACGCAGTGCTTTAAGGGGCTAACACAGAAGGGTAAAGGAA GTCTCCATAAACCCCAGAGAAGAGATTGTAAAGCTCCTCTTTAGAACCTTTCTGGAGT CACACCT                                                                                    |  |
| ex3_58_01827_x1 | CM000669.2/152069005-152068900   | 20 | 0.002 | 32.2 | 1 | ATTCTTTTGTAGTTCATAAGTGTGGTGAAGTGGGTTTTTCATGTGCTTGTGGGAAATATG CCTCCCTCAAATCTTATTACGAAGTCAGCCATTTTACTTGTCTGACA                                                                                                    |  |
| ex3_58_02130_x1 | CM000679.2/44303998-44304203     | 20 | 0.001 | 32.2 | 1 | GGGCACAGTCTCATTGTTTCTATAGTTTATTACCAGAAAAGTTTCTCAGAATGTGTAG AGCACTGGAAACCATGAGGAAGAGGCATAGCGTTCTCTTTGAGCATCAAGTTGGCT GTTGGTGTGCTTTGCTGCAAACGCCATTTGTCATTGTCTTCCTTGTCTTCCTTTAGG AGAGTAAGAGGGAGAGGACACAGTCTGGGTAGT |  |
| ex3_58_02263_x1 | ENST0000611947.1                 | 15 | 0.003 | 30.2 | 1 | AAGCCTATGCATTCTGGGATCATTTCGATAGCTCGTTCCTGGAGAAGTTTCTCTGAG CAC                                                                                                                                                   |  |
| ex3_58_02482_x1 | CM000673.2/11562708285-115627082 | 14 | 0.008 | 28.2 | 1 | GTCCTTTTGTAGTTCATAAGCGAGATGATTGGGTGTTTCAGGCACATGTGTGAGATGT GCCTCCTTCAAACCTTGTTACAACGTCAGCACATTACCCGCCTGACA                                                                                                      |  |
| ex3_58_02973_x1 | ENST0000384004.1                 | 15 | 0.004 | 30.2 | 1 | TTCTAAAGTGTTGAGTTCAGTCCAGGGTGGATCCCCTGCTCTGTTAATTGAACTGGA ACA                                                                                                                                                   |  |
| ex3_58_03452_x1 | ENST000036                       | 21 | 5E-07 | 42.1 | 1 | TGGACCAATGATGACAAATACCGGCGTATGAGTCTTGGATGATGAATAATACGTGTC TGG                                                                                                                                                   |  |

|                        |                                    |    |            |      |   |                                                                                                                                               |  |
|------------------------|------------------------------------|----|------------|------|---|-----------------------------------------------------------------------------------------------------------------------------------------------|--|
| x1                     | 5400.1                             |    |            |      |   |                                                                                                                                               |  |
| ex3_58<br>04481_<br>x1 | ENST0<br>000036<br>5087.1          | 16 | 0.000<br>6 | 32.2 | 1 | AGGTCACCTTCAAAGAGGGCTTGTGGGGCTGTGAAACCAAGAGGTCTTAACAGTATGA<br>CCA                                                                             |  |
| ex3_58<br>04516_<br>x1 | CM000<br>667.2/1<br>338509         | 15 | 0.004      | 30.2 | 1 | ATCTTTTGTGTTTCCTAAGTGTGATGATTGAGTTTTCAAACCTCACTTGAGGTGTGCCT<br>CCCTTAAACCTCATTATGACATCAGCATATTACCCATCTGACG                                    |  |
|                        | 57-<br>133850<br>857               |    |            |      |   |                                                                                                                                               |  |
| ex3_58<br>04850_<br>x1 | CM000<br>665.2/1<br>874233         | 14 | 0.009      | 28.2 | 1 | ATCCTTTTGCAGTTCATGAACATGATGATTGGGTGTTTCATGCTCATGTGTGAGATGTG<br>CCACCCTCTGAATCTTGTTATGACATCAGCACATTATCCATCTGACC                                |  |
|                        | 15-<br>187423<br>419               |    |            |      |   |                                                                                                                                               |  |
| ex3_58<br>05836_<br>x1 | AL049<br>840.8/4<br>9457-<br>49533 | 21 | 7E-07      | 42.1 | 1 | AUUGUUACAUUGAUAAAAUCAAAUCACCAUCUUUUUAGCUAAGCUUGUGCUGGAUU<br>UGCUUUUUUUCUGAUAAAGAUG                                                            |  |
| ex3_58<br>06011_<br>x1 | CM000<br>667.2/8<br>431560         | 15 | 0.003      | 30.2 | 1 | AAGACTATACTTTTCAGGGATCATTCTATGGTTCATTACTAGGGAAGTTTCCCTGAAT<br>GTGTAGAGCACCCGAAAACACTCTTCAGG                                                   |  |
|                        | 5-<br>843156<br>90                 |    |            |      |   |                                                                                                                                               |  |
| ex3_58<br>06379_<br>x1 | CM000<br>685.2/1<br>704451         | 15 | 0.003      | 30.2 | 1 | GGCGGCCCTTATCACAGCTGCAGCTGCTTCCACATAGCTGCTGCGGTCAAAAAGGA<br>GCCCAGAGTCAGTTTCCCTTGACCATCACCATTCTGTTTGCTATAAGTGATCTGTAACA<br>TTTTGCGAAAATACAGTT |  |
|                        | 1-<br>170443<br>80                 |    |            |      |   |                                                                                                                                               |  |
| ex3_58<br>06981_<br>x1 | CM000<br>671.2/1<br>145653         | 15 | 0.002      | 30.2 | 1 | ATCCTTTTGTAGTTCATAAGGATGATGACTGAGTGTTCCACTCGTGTGTGAGATGTG<br>CCACCCTCAGACCTTGAAATCTTCAGTCACTCTTGTTAAGTGAAC                                    |  |
|                        | 52-<br>114565<br>250               |    |            |      |   |                                                                                                                                               |  |
| ex3_58<br>07236_<br>x1 | CM000<br>671.2/1                   | 16 | 0.000<br>7 | 32.2 | 1 | ATGCATCTATTTGACAGCCCCAGAGCAGTTACTGTCTGCTAAGGTTTCCACTACAGAT<br>GCAAAAACAGCGTCCCTGTGCTTTCTCTCTGACTGCTTTCTGCTTTCTGTGGCAGCC                       |  |

|                        |                                                    |    |       |      |   |                                                                                                                |
|------------------------|----------------------------------------------------|----|-------|------|---|----------------------------------------------------------------------------------------------------------------|
| x1                     | 310213<br>06-<br>131021<br>168                     |    |       |      |   | GAGATTGAATAGAGGAATCCAGGA                                                                                       |
| ex3_58<br>07293_<br>x1 | CM000<br>672.2/1<br>639875<br>9-<br>163986<br>55   | 15 | 0.002 | 30.2 | 1 | ATCCTTTTGTAGTTCATGAGCATGACCATCGAGTGTACATGCATGTGTGAGATATG<br>ACACCTTCTGAACCTTGTTACGGAGTTGGCATGTTACCCATCTAACC    |
| ex3_58<br>07810_<br>x1 | ENST0<br>000051<br>6831.1                          | 15 | 0.006 | 30.2 | 1 | TAGTGTGGAAGTGTCTACTCCTCATTCTGTGGAAGCAGGAATACATTCATAACATGC<br>TC                                                |
| ex3_58<br>08545_<br>x1 | ENST0<br>000051<br>6965.1                          | 15 | 0.005 | 30.2 | 1 | TTACCTTGAATACATACAGATACTTCTGTTACTCTCTAGCTTAAGAACCTTTAATGTG<br>G                                                |
| ex3_58<br>08602_<br>x1 | ENST0<br>000036<br>3205.1                          | 14 | 0.009 | 28.2 | 1 | AGGATATATCAAAGAGACTTTCTGGGGCTGGGAAACCAGGATCTCGTAATGCTATGA<br>CCA                                               |
| ex3_58<br>08885_<br>x1 | ENST0<br>000051<br>6634.1                          | 14 | 0.009 | 28.2 | 1 | GATTCACAGCAGAAAGACAGCTAATCTAGTGTGCTAGCTGTAGAGCAAGTTTGCTGC<br>AAA                                               |
| ex3_58<br>09911_<br>x1 | CM000<br>663.2/2<br>156301<br>17-<br>215630<br>026 | 14 | 0.008 | 28.2 | 1 | AGATCATTGATGACTTCCATATATCCATTCTTGGAAAGCTGAACAACATGAGTGAAA<br>ACTCTACTGAAAAAAGAAAAGAAATGGGAGGCCG                |
| ex3_58<br>11206_<br>x1 | CM000<br>681.2/3<br>834911<br>0-<br>383490<br>09   | 15 | 0.003 | 30.2 | 1 | ATCTTCTTGTAGTTTCTACGTGTGGCGATTGGGTTTTACCGTCATCTGAGATGTGTC<br>TCCCTCAAGCCTTGTTATGGTGTGCGCCATTACCTGTCTGACA       |
| ex3_58<br>11793_<br>x1 | ENST0<br>000036<br>3915.1                          | 21 | 5E-07 | 42.1 | 1 | TCCCAATGATGAGTTGCCATGCTAATACTGAGCCACCAGGTAGGGCAGTGTTGCCCT<br>GGT                                               |
| ex3_58<br>11980_<br>x1 | CM000<br>683.2/3<br>934545                         | 14 | 0.008 | 28.2 | 1 | ATCCTTTTCATAAGCTTGAAGATTGGGGTTTACGCTCATGTGTGAGATGTCCCTCTCT<br>CAAACCTTACTATGAAGTCAGCACCCTGGGCACATTACTTGTCTGACA |

|        |                |    |       |      |   |                                                             |  |
|--------|----------------|----|-------|------|---|-------------------------------------------------------------|--|
|        | 7-             |    |       |      |   |                                                             |  |
|        | 393453         |    |       |      |   |                                                             |  |
|        | 51             |    |       |      |   |                                                             |  |
| ex3_58 | ENST0          | 14 | 0.009 | 28.2 | 1 | TCCATCTGTTTGGCAGACCTGGAGCAGTTAGTGTCTGCTGCTAAGGTTTCCATTACA   |  |
| 12322_ | 000051         |    |       |      |   | GAT                                                         |  |
| x1     | 7219.1         |    |       |      |   |                                                             |  |
| ex3_58 | AP000          | 18 | 8E-05 | 36.2 | 1 | GAGCUUCCAGGAUCACCCUUGCAGAGUGGCUAAUUAUUCUGCCAGCUUCGGAAAGG    |  |
| 13648_ | 577.5/6        |    |       |      |   | GAGGGGAAGCAAGCCUGGCAGAGGCACCCAUUCCAUUCUCCAGCUUGCUUAGUAG     |  |
| x1     | 9612-<br>69474 |    |       |      |   | CUGGCCAUGGGAAGACACUGUGCAACACUG                              |  |
| ex3_58 | ENST0          | 17 | 0.000 | 34.2 | 1 | GGCCTTTTGGTGCTTACCACAGACTGTGCTCTTTCCTGACTGAATAGAGAGAGGAG    |  |
| 13711_ | 000038         |    | 3     |      |   | GCA                                                         |  |
| x1     | 4151.1         |    |       |      |   |                                                             |  |
| ex3_58 | ENST0          | 15 | 0.002 | 30.2 | 1 | CTTCCCATTATTTGCTGGTATAGTCTCACAATGATATGGCCAGTTATACTTATGGGA   |  |
| 13849_ | 000036         |    |       |      |   | AA                                                          |  |
| x1     | 4790.1         |    |       |      |   |                                                             |  |
| ex3_58 | ENST0          | 20 | 3E-06 | 40.1 | 1 | AAGACTATACTTTCAGGGATCATTCTATAGTTAGTTGCTAGAGAAGTTTCTCTGGAC   |  |
| 14153_ | 000036         |    |       |      |   | AT                                                          |  |
| x1     | 3668.2         |    |       |      |   |                                                             |  |
| ex3_58 | ENST0          | 14 | 0.009 | 28.2 | 1 | ATCCTTTCACAGTTCATAAGAGTGATGACTGGGTTTTCACTTTCATGTGTAAGATGTG  |  |
| 14274_ | 000045         |    |       |      |   | CC                                                          |  |
| x1     | 9350.1         |    |       |      |   |                                                             |  |
| ex3_58 | ENST0          | 15 | 0.006 | 30.2 | 1 | AAGACTATACTCTCAGGAATCATTCTATAGTTTTTTACTAGAGAAATTTCTCTGAACG  |  |
| 14840_ | 000038         |    |       |      |   | T                                                           |  |
| x1     | 4486.2         |    |       |      |   |                                                             |  |
| ex3_58 | ENST0          | 14 | 0.008 | 28.2 | 1 | AAAGCAAGCTGGAATTACAGTGCTTCATTTTGTGAAATACTAAATACCATCATTATGCT |  |
| 15998_ | 000039         |    |       |      |   | G                                                           |  |
| x1     | 0904.1         |    |       |      |   |                                                             |  |
| ex3_58 | CM000          | 14 | 0.008 | 28.2 | 1 | GGACCAATGATGACTTCCATACATGCATTCCCTTGAAAGCTGAACAAAATGAGTGGG   |  |
| 16479_ | 677.2/2        |    |       |      |   | AACTCTGTACTATCATCTTAGTTGAACTGAGGTCC                         |  |
| x1     | 507905         |    |       |      |   |                                                             |  |
|        | 8-             |    |       |      |   |                                                             |  |
|        | 250791         |    |       |      |   |                                                             |  |
|        | 49             |    |       |      |   |                                                             |  |
| ex3_58 | ENST0          | 28 | 6E-11 | 56   | 1 | AATGAATGATGACAAAATGTTTCAGTCCCAAATGATACATACTGATTATACCATTATAT |  |
| 16619_ | 000036         |    |       |      |   | T                                                           |  |
| x1     | 4394.1         |    |       |      |   |                                                             |  |
| ex3_58 | CM000          | 15 | 0.005 | 30.2 | 1 | ATCCTTTTGTAGTTCATAAGCTGATGGTTGGGTTTTACGCTCATGTGTGAGATGTGT   |  |
| 16750_ | 668.2/4        |    |       |      |   | TCCTTCATATCTGTCAACACACTACCGGGCTGTTG                         |  |
| x1     | 643762         |    |       |      |   |                                                             |  |

|        |         |    |       |      |   |                                                             |  |
|--------|---------|----|-------|------|---|-------------------------------------------------------------|--|
|        | -       |    |       |      |   |                                                             |  |
|        | 464385  |    |       |      |   |                                                             |  |
|        | 4       |    |       |      |   |                                                             |  |
| ex3_58 | CM000   | 14 | 0.008 | 28.2 | 1 | GATCAGCTTTTTCAAAGGTTTACTGCATTTTTACCCTCCCTGATGGGGCTCAGTGTGCG |  |
| 17333_ | 686.2/2 |    |       |      |   | CAGCTGGAAAAAGTAGATGCCCTGGTTATGCATGCAGCTCATTTGTTGTACATGTTG   |  |
| x1     | 624738  |    |       |      |   | CTTTAAGGGACCTTGAAGACTCTT                                    |  |
|        | 4-      |    |       |      |   |                                                             |  |
|        | 262475  |    |       |      |   |                                                             |  |
|        | 21      |    |       |      |   |                                                             |  |
| ex3_58 | CM000   | 14 | 0.008 | 28.2 | 1 | AAGACTTTATCCCCCACCCCGCAAAGAAAAGGAAGAAGAAGAGTTTTTAAATGGCG    |  |
| 17449_ | 663.2/2 |    |       |      |   | CAGCCCTGGAATCCACAAGGAGGAGGTTTCAGTATTCTCTCCTGAGCGTGAAGTTGGT  |  |
| x1     | 199626  |    |       |      |   | TCTTGGCATTGCTTCACTGCAACTGCTATTTGCCATTGATGATTGTTCTTCTCTTCTC  |  |
|        | 52-     |    |       |      |   | TGAGAGAGTAAGAGGGAGAGGATGCATGCAGTCTGAGTGGT                   |  |
|        | 219962  |    |       |      |   |                                                             |  |
|        | 865     |    |       |      |   |                                                             |  |
| ex3_58 | CM000   | 14 | 0.008 | 28.2 | 1 | AAGACCCTTCAGCTGCAAACAACAGCTTCCTTGGTAGTTTATGCAGCCTGTTTCTTGT  |  |
| 17839_ | 678.2/5 |    |       |      |   | ATGGGCTGCTCTAAGGGACCATGGAGACAGGC                            |  |
| x1     | 015173  |    |       |      |   |                                                             |  |
|        | 1-      |    |       |      |   |                                                             |  |
|        | 501516  |    |       |      |   |                                                             |  |
|        | 42      |    |       |      |   |                                                             |  |
| ex3_58 | ENST0   | 14 | 0.009 | 28.2 | 1 | CTTCTGCTAAGGTTTACACTATAGATGCAGGAAAAAAATGTCCTCACACTGTCTGTC   |  |
| 19324_ | 000051  |    |       |      |   | TG                                                          |  |
| x1     | 6029.1  |    |       |      |   |                                                             |  |
| ex3_58 | AJ6094  | 23 | 4E-08 | 46.1 | 1 | CUGGCACUUUCACAGUUCUUCCCCAGGCAGUGGGGCCAGGAUUUGGUAGCUGG       |  |
| 19516_ | 40.1/1- |    |       |      |   | UGCUGAGAGAAAACCCUUGAUUGUAUUCUUGCCCUGGGAUUUAUACCAGUGGCAAC    |  |
| x1     | 129     |    |       |      |   | UGUCACUCAAUUGGGACAGUG                                       |  |
| ex3_58 | CM000   | 18 | 0.009 | 28.2 | 1 | ATCTTTTTGTAGTTCATAAACGTGATGACTGTGTTTTTCATGCTCATGCGTGAGTTGCA |  |
| 19691_ | 678.2/2 |    |       |      |   | CCTCCCTCAAACCTTGTTTTGACATTGACACATTATCTGCCTGATG              |  |
| x1     | 867233  |    |       |      |   |                                                             |  |
|        | 6-      |    |       |      |   |                                                             |  |
|        | 286722  |    |       |      |   |                                                             |  |
|        | 33      |    |       |      |   |                                                             |  |
| ex3_58 | CM000   | 14 | 0.008 | 28.2 | 1 | ATCCTTTTATAGTTCATAAACATAGTAATTAGGTGTTCCCATTGCATGTATGAGATGTG |  |
| 21579_ | 664.2/6 |    |       |      |   | CCTCCCAAAGAGCTTGTTACAGCGTTAGTACATTACCTGTCTGATA              |  |
| x1     | 991269  |    |       |      |   |                                                             |  |
|        | 5-      |    |       |      |   |                                                             |  |
|        | 699127  |    |       |      |   |                                                             |  |
|        | 99      |    |       |      |   |                                                             |  |
| ex3_58 | ENST0   | 14 | 0.009 | 28.2 | 1 | AAGACTACACTTTCAGGGATCCTTTCTTCAGTTCGTTACTAGAGGTTTCTCTGAATAT  |  |

|        |         |    |       |      |   |                                                              |
|--------|---------|----|-------|------|---|--------------------------------------------------------------|
| 21706_ | 000040  |    |       |      |   | GT                                                           |
| x1     | 8418.2  |    |       |      |   |                                                              |
| ex3_58 | ENST0   | 15 | 0.004 | 30.2 | 1 | TTGCATGTGGTAATGTCTGCTCTTCATTCCCTTTGGGAGCAGAAATACATCCATAACAC  |
| 21750_ | 000045  |    |       |      |   | GC                                                           |
| x1     | 8806.1  |    |       |      |   |                                                              |
| ex3_58 | CM000   | 16 | 0.001 | 32.2 | 1 | AGCACTTGTGTTTGGCTTTTGTGTTGACTTGTGGACAAAGACTTATAGTAGACAGGCACG |
| 22125_ | 667.2/1 |    |       |      |   | AAAAAATAAATCCTCTTTTGGCAACCCATGAGTTGTTATACATGCAAGAAGGAATATT   |
| x1     | 680332  |    |       |      |   |                                                              |
|        | 05-     |    |       |      |   |                                                              |
|        | 168033  |    |       |      |   |                                                              |
|        | 091     |    |       |      |   |                                                              |
| ex3_58 | ENST0   | 14 | 0.008 | 28.2 | 1 | CAGTCAGTGTGCGAGAACCTTATATTGTTCTGAAGAGAGGTGGTGACTTAAAAATCATG  |
| 22184_ | 000036  |    |       |      |   | CT                                                           |
| x1     | 3528.1  |    |       |      |   |                                                              |
| ex3_58 | ENST0   | 15 | 0.004 | 30.2 | 1 | GTGTGATGAAATCACCCCAAATAGCTGGAATTACCAGCAGATTGTGTAGTGGTGAAC    |
| 22343_ | 000045  |    |       |      |   | CTA                                                          |
| x1     | 9126.1  |    |       |      |   |                                                              |
| ex3_58 | CM000   | 19 | 0.005 | 30.2 | 1 | AAGACTATACTTTTCAGGGATCATTCTATAGTTCATTACTAGAGAAGTTTCTCTGAATG  |
| 22702_ | 680.2/7 |    |       |      |   | GGTAGAGCACTGGAAACCATGAGGAGGAGGCACAGTGTTCTCTCCTGAGCATGAAG     |
| x1     | 995570  |    |       |      |   | CTGACTCTTGGTGTGCTTCACTGCACCTGCCATGTGCCACTGATGATTGTTCTTGTCT   |
|        | -       |    |       |      |   | TTCCTCTGGGAGAGTAAGACGGAGAGCATGCAGTCTGAGTGCT                  |
|        | 799578  |    |       |      |   |                                                              |
|        | 5       |    |       |      |   |                                                              |
| ex3_58 | CM000   | 14 | 0.009 | 28.2 | 1 | ATCCCTTTGTAGTTCATAAGCATGATAATTGGGGTTTCCCTCGCATGTGTGAGACATG   |
| 25207_ | 679.2/1 |    |       |      |   | CTTCCCTCAAACCTTGTTACGAAGCTGGCACAGTATCCATCTGATG               |
| x1     | 616295  |    |       |      |   |                                                              |
|        | -       |    |       |      |   |                                                              |
|        | 161619  |    |       |      |   |                                                              |
|        | 2       |    |       |      |   |                                                              |
| ex3_58 | CM000   | 14 | 0.008 | 28.2 | 1 | CCAATGTGGATACACCCAGGAGGTCACTCTCTCCCAGGCTGTGTCCAAGTAGCATA     |
| 25327_ | 682.2/8 |    |       |      |   | GGGAGCACAGGGCTCTGTCCCATGATGTAAGTGTCTTTTCCATGACATTGGAGAT      |
| x1     | 831186  |    |       |      |   | GAAGCTGGACCTCAACTCTGCACATGCATATTCCTACAATTCTCAGAGTCTGTGG      |
|        | -       |    |       |      |   | ATAATGACGGAGGAGAGAAACCATGCAGGAAACAGCC                        |
|        | 883139  |    |       |      |   |                                                              |
|        | 3       |    |       |      |   |                                                              |
| ex3_58 | CM000   | 14 | 0.009 | 28.2 | 1 | TGGACCAGTGATAAGAATGTGTTAGGAACCAAAGATTAGGAGTAATCTAGTTTTGTAT   |
| 25406_ | 670.2/4 |    |       |      |   | ATCTGAGGTCCATT                                               |
| x1     | 204357  |    |       |      |   |                                                              |
|        | 5-      |    |       |      |   |                                                              |
|        | 420435  |    |       |      |   |                                                              |

|                        |                                                        |    |            |      |   |                                                                                                                                            |
|------------------------|--------------------------------------------------------|----|------------|------|---|--------------------------------------------------------------------------------------------------------------------------------------------|
| ex3_58<br>25474_<br>x1 | 04<br>CM000<br>684.2/2<br>823282<br>3-<br>282327<br>56 | 15 | 0.003      | 30.2 | 1 | CAGCCCTAAAATGGAAAAATTTAAAATTACTTAGACAATGTGATGTCATCAAAGGAA<br>CCCTAAGTAA                                                                    |
| ex3_58<br>26044_<br>x1 | ENST0<br>000036<br>4528.1                              | 14 | 0.008      | 28.2 | 1 | TCGTCAGGTGGGAGAATTCTTACATGTTCCCTCCTTTTGCAAGGCAGATTAGAACATGA<br>TG                                                                          |
| ex3_58<br>26727_<br>x1 | ENST0<br>000039<br>0863.2                              | 15 | 0.004      | 30.2 | 1 | AAGATTATATTTTCAGGGATCATTCTATAGTTTGTCACTAGGGAAGTTCCTCTGAATG<br>T                                                                            |
| ex3_58<br>27757_<br>x1 | CM000<br>663.2/1<br>515279<br>38-<br>151527<br>831     | 14 | 0.009      | 28.2 | 1 | TATAGTGTGGCCATGGGATCTCCAACCTGCATGCAAGAGCAACCTGGAGAGACTTTGA<br>CAGAACAGGTCAGACAATCCCTGCAGCTGCCACTTGTCTTTCGTGTGTGT                           |
| ex3_58<br>27901_<br>x1 | AC087<br>763.10/<br>29854-<br>29985                    | 15 | 0.002      | 30.2 | 1 | CUGCAGCCAAUUGAGCUGAUGGAGUUCCUUUCCUCCUGGGGCCAGUGUGCAA<br>AGCUGCAAACAGCAGCUUCCUUGGUAGUGUACGCAGCCUGUUUCUUUAUUGGGU<br>UGCUCUAAGGGACCUUGGAGACAG |
| ex3_58<br>29919_<br>x1 | CM000<br>674.2/1<br>200484<br>30-<br>120048<br>528     | 14 | 0.009      | 28.2 | 1 | ATCTTTTTGTAGTTCATAAACATGATGATTGGGCTTTCACACTTGTTTGAGGTGTGTCT<br>TCCTCAAACCTTATAGTGTGTCAGCACATTGCCTGTCTGATG                                  |
| ex3_58<br>30278_<br>x1 | CM000<br>670.2/5<br>612135<br>2-<br>561212<br>42       | 14 | 0.009      | 28.2 | 1 | ACCAAGATTCAAGTCACATTCCGAGTGTCCCGGTGTGCTAGGGCACTTGCAGAGAAT<br>CTGCTGGTCTTGATTCACTGGTGGGGGCAATCGGTGCCAGATTAGGAACATGC                         |
| ex3_58<br>32426_<br>x1 | ENST0<br>000051<br>6421.1                              | 18 | 0.009      | 28.2 | 1 | TTTCCAGAATTACGGGTTTGACAAACCAAACATTCAATTATTTTCTCTCTAGAGAGAG<br>TT                                                                           |
| ex3_58<br>32519_<br>x1 | ENST0<br>000060                                        | 16 | 0.000<br>5 | 32.2 | 1 | TGTGTGCTCCACAAGGAGCACATTTTGCCTAACACCACAAGAGTCTGGCTCAGTGA<br>ATG                                                                            |

|                        |                                                  |    |            |      |   |                                                                                                                                                                                                                                  |  |
|------------------------|--------------------------------------------------|----|------------|------|---|----------------------------------------------------------------------------------------------------------------------------------------------------------------------------------------------------------------------------------|--|
| x1                     | 6322.1                                           |    |            |      |   |                                                                                                                                                                                                                                  |  |
| ex3_58<br>33900_<br>x1 | CM000<br>670.2/4<br>337829<br>8-<br>433785<br>10 | 15 | 0.003      | 30.2 | 1 | AATGCTATACTTTTCATGGGTCATTTCTATAGTTTGTATTAGAGAAGTTTCTCTGAATG<br>TGTTGAGCACCAGAAACCACGAGGAGATGCAGCATTCTCCTGAACGGGAAGCCA<br>GCTTTTGGCATTGCTTTGATGCAACTACCATTTGCCATTGATGGCAATGCATCGCTTC<br>CTCTAGGAGTGTAAAGAGGGAGTGGATGCAGTCAGAGTGGT |  |
| ex3_58<br>34004_<br>x1 | AC064<br>836.7/3<br>0066-<br>30155               | 23 | 6E-08      | 46.1 | 1 | UGAUGGCAAUGAUGAUUUUUACACUUAUUGUUGUUCACCUGAUACAUAUAUAUG<br>AGGGUGUUCAGUCACUACCUCAUCUGAUGCCAUCA                                                                                                                                    |  |
| ex3_58<br>34060_<br>x1 | ENST0<br>000040<br>8133.1                        | 15 | 0.002      | 30.2 | 1 | AGGGTTTGCTTAGGGCAGGGAGGTTGAAGAGTGGCTCCTCTGTTTACAATACACCAA<br>ACA                                                                                                                                                                 |  |
| ex3_58<br>34405_<br>x1 | CM000<br>684.2/3<br>694848<br>0-<br>369485<br>61 | 19 | 0.004      | 30.2 | 1 | ATTATTTTGTAAATTCATAGACGTGATGATTGGGTGTTCCCTATGCATGTGTGAGATGTG<br>CCACCTTCAAACCTTGTTACTGTA                                                                                                                                         |  |
| ex3_58<br>37189_<br>x1 | ENST0<br>000036<br>4359.1                        | 19 | 1E-05      | 38.2 | 1 | AGGTTGGATTTCATTGTTACAATATAGCTGTGAAGTGCTATGTTGTCCTTGCCCCCTGC<br>TC                                                                                                                                                                |  |
| ex3_58<br>37646_<br>x1 | ENST0<br>000038<br>4159.1                        | 14 | 0.009      | 28.2 | 1 | CTGCAGTCAATTAAGCCAGCTGTACTCCTTTCTCACAGGGGCTCGGTGTAATGGCT<br>GCA                                                                                                                                                                  |  |
| ex3_58<br>37856_<br>x1 | CM000<br>680.2/3<br>209450<br>4-<br>320946<br>06 | 14 | 0.008      | 28.2 | 1 | ATCCTTTTGC GGTTTCATAGTGTGATGATTGAGTGTTCCACAGGCATGTGTGAGATATGC<br>CATCCTCAAACCTTGTTACAGGGTCAGCACATTACCCATCTGACA                                                                                                                   |  |
| ex3_58<br>37898_<br>x1 | CM000<br>677.2/2<br>489374<br>7-<br>248938<br>48 | 16 | 0.000<br>6 | 32.2 | 1 | ATTCTTTTCATGGTTCTTTATCGGTATGGTGATAGGGTTTTTCATATTCATGTGTGAGATG<br>TGCTCCCTCAGTCCTTGTTATGACATCATTACGTGTCTGACA                                                                                                                      |  |
| ex3_58<br>37914_<br>x1 | ENST0<br>000039                                  | 15 | 0.004      | 30.2 | 1 | TTCTTATTGAGCTCCTTTCTGTCTACTGGTGGCAGTCTATGGATTTGCACAAGACAAA<br>AC                                                                                                                                                                 |  |

|                        |                                                    |    |            |      |   |                                                                                                                                                                                                                                         |  |
|------------------------|----------------------------------------------------|----|------------|------|---|-----------------------------------------------------------------------------------------------------------------------------------------------------------------------------------------------------------------------------------------|--|
| x1                     | 1278.1                                             |    |            |      |   |                                                                                                                                                                                                                                         |  |
| ex3_58<br>38718_<br>x1 | CM000<br>672.2/2<br>686816<br>5-<br>268682<br>64   | 14 | 0.009      | 28.2 | 1 | ATCCTTTTCATAGTTCATAAGCATGATTGGGTTTTTCACACTATGTGTAAGATGTGCCTC<br>CATCAAACCTTGTTAGGATGTTGGCATATCACCCATCTGATG                                                                                                                              |  |
| ex3_58<br>38988_<br>x1 | CM000<br>668.2/1<br>495946<br>25-<br>149594<br>759 | 15 | 0.003      | 30.2 | 1 | TAGGCCCTGAATCAAGAAACGTGATGGTTTGCCATTGTAGCTATTGGTTTCAAACAAG<br>AGCCAAGATTGATGTCTTTCTTATGGTCTGTTGGCTAATCCCAGTATGAATGGCCAGT<br>TCAGCTAGAAGAAACAAAC                                                                                         |  |
| ex3_58<br>40365_<br>x1 | AF250<br>841.1/1<br>8857-<br>18939                 | 14 | 0.008      | 28.2 | 1 | GGAUCGAUGAUGACUUAUUUUUUUUGGAAACCUUGGAAUUCUGAACAAAAUGAGUGA<br>CCAAGACACUUCUGUGAGCUGAGGUCC                                                                                                                                                |  |
| ex3_58<br>40873_<br>x1 | CM000<br>666.2/1<br>587006<br>91-<br>158700<br>909 | 26 | 6E-05      | 36.2 | 1 | AAGACTATACTTTTCAGGGATCATTCTCTAGTTCAATACTACAGAAGTTTCTCTGAAG<br>GTGTAGCAAGCACCAGAAACCACGAGGAAAGTGCAGTATTCTCTCCAAGTGTGATG<br>CCGCCCGTCTCTTGATGTTGCTTTGCTCAGCTGCCATTCCGGCATTGATGATTGTTTTA<br>TCCTTCCTTAGGAAGAGTGAGAGGGAAAGGATGCAGTCCAAGTGGC |  |
| ex3_58<br>41028_<br>x1 | CM000<br>665.2/1<br>716932<br>11-<br>171693<br>314 | 15 | 0.002      | 30.2 | 1 | ATCCTTTTGTAGTTCATGAGCATGATGATTGTGTGTTACACACAAGCGTGAGATGTG<br>CCCACTCGAACCTTCTTACGACGTCTGCACATTACCCATCTCATC                                                                                                                              |  |
| ex3_58<br>41284_<br>x1 | ENST0<br>000051<br>6773.1                          | 18 | 7E-05      | 36.2 | 1 | ATGCATCTATTTGACAGCCCCAGAGCAGTTACTGTCTGCTAAGGTTTCCACTACAGAT<br>GC                                                                                                                                                                        |  |
| ex3_58<br>41977_<br>x1 | CM000<br>679.2/1<br>207716<br>8-<br>120770<br>77   | 15 | 0.005      | 30.2 | 1 | AAGACTATACTTTTCAGGGGTCAATTTCTATAGTTCATTACTAGAGAAGTTTCTCTGAACA<br>TGCAGAGCACCTAAGATGTTTCCGTTCTCCTGA                                                                                                                                      |  |
| ex3_58<br>42159_<br>x1 | CM000<br>672.2/6                                   | 16 | 0.000<br>8 | 32.2 | 1 | ATCTGTTTGTAGTCATAATTGTGATGGTTGAGTTTTTCATGTGTGAGATGTGTATCACT<br>CAAGCCTTTTTACAATGTCGGTATATTGCCGGGTGCGGTG                                                                                                                                 |  |

|                        |                                                    |    |       |      |   |                                                                                                                     |  |
|------------------------|----------------------------------------------------|----|-------|------|---|---------------------------------------------------------------------------------------------------------------------|--|
| x1                     | 871295<br>8-<br>687130<br>55                       |    |       |      |   |                                                                                                                     |  |
| ex3_58<br>43287_<br>x1 | CM000<br>685.2/1<br>533514<br>73-<br>153351<br>576 | 14 | 0.009 | 28.2 | 1 | ATCCTTTTGTAGTTCATACACATGACAATTGGGTTTCCACGCACGTGCATGAGATGTT<br>CCTCCTTCAAACCTTGTTACTATGTCAGCACATTAAGTGCCTGGCA        |  |
| ex3_58<br>43404_<br>x1 | ENST0<br>000038<br>3865.1                          | 15 | 0.006 | 30.2 | 1 | GTGGAGGTCTATTCCAATGGGGCTTTTCTGTAGCTGCATGTTGTTGGAAACTCCTC<br>ATA                                                     |  |
| ex3_58<br>44058_<br>x1 | ENST0<br>000036<br>3091.1                          | 20 | 2E-06 | 40.1 | 1 | CTGAGTCCATGATGATTTCAAGTTATCCCTGTCTGAAGGCAAAGAAAGGCCTTTCTGT<br>GT                                                    |  |
| ex3_58<br>44478_<br>x1 | AL161<br>747.5/1<br>3638-<br>13529                 | 22 | 2E-07 | 44.1 | 1 | UCCCAAUGAUGAGUUGCCAUGC UAAUACUGAGCCACCAGGUAGGGCAGUGUUGCC<br>CUGGUUUGGGUGCCAGUGAGUUUAACAAAACUUCUCACAUGAAGAUCUGAGGGGC |  |
| ex3_58<br>44534_<br>x1 | CM000<br>664.2/1<br>721561<br>39-<br>172156<br>029 | 24 | 0.001 | 32.2 | 1 | ATTCTCCTAAGGACTGTGCAACCTGAGCATGATGATTGGGTATTCACGTGCATGTGT<br>GAGATCTGCCACCCTTGAACCTTGTTATGACGTTAGCACATTACCCATCTGACA |  |
| ex3_58<br>44650_<br>x1 | ENST0<br>000036<br>4830.3                          | 19 | 0.003 | 30.2 | 1 | TAGACCAATGATGAGTATTCTGGGGTGTCTGAATCAATGATTTTGATTAACCCTGTA<br>AC                                                     |  |
| ex3_58<br>44769_<br>x1 | CM000<br>666.2/4<br>730603<br>7-<br>473059<br>34   | 14 | 0.008 | 28.2 | 1 | TTCCTTTTGTAGTACATGAGCATGATGATTTAATTTTACACACATGTGTAAGACATGC<br>CTCTCTCAAACCTTTGTTATGAGGTCAGCACATTACCTTTCTGATA        |  |
| ex3_58<br>44923_<br>x1 | ENST0<br>000038<br>4785.1                          | 18 | 0.009 | 28.2 | 1 | TTCCACCACTATTGGTCTGCAGCTCTTCTTATGGTAGCAGTTGTTGCATTTCTCTGTG<br>GG                                                    |  |
| ex3_58<br>45388_<br>x1 | ENST0<br>000051                                    | 15 | 0.002 | 30.2 | 1 | CAGACTTACAGATAAGTTCGAGAAATAAACCCCTGTTTTGCAACCCAGAGCACATTGTT<br>CA                                                   |  |

|               |                    |    |        |      |   |                                                                                                                                                  |  |
|---------------|--------------------|----|--------|------|---|--------------------------------------------------------------------------------------------------------------------------------------------------|--|
| x1            | 5895.1             |    |        |      |   |                                                                                                                                                  |  |
| ex3_58_45430_ | ENST0_000036       | 16 | 0.0006 | 32.2 | 1 | GATCAAGGATGAAAATACCCAAATTTGAGTATCAGAAGACCTTCCAGTCTACTTGATGCA                                                                                     |  |
| x1            | 3024.1             |    |        |      |   |                                                                                                                                                  |  |
| ex3_58_45737_ | AF141_346.1/2      | 15 | 0.002  | 30.2 | 1 | UACUGUUAGUGAUGAUUUUAAAAUUAAAGCAGAUGGGAAUCCCUCUGAGAAAGAA<br>AAUGGAGAUUAAUCUUAACUGAAACAGUA                                                         |  |
| x1            | 553-2637           |    |        |      |   |                                                                                                                                                  |  |
| ex3_58_46128_ | ENST0_000041       | 15 | 0.003  | 30.2 | 1 | GTGCACATTTTCATTGTCTTTTTTCTTTATTTCAAGAGAAAAGATATATCTGATGTGCTCA                                                                                    |  |
| x1            | 0656.1             |    |        |      |   |                                                                                                                                                  |  |
| ex3_58_46751_ | CM000_667.2/7      | 16 | 0.001  | 32.2 | 1 | ATCCTTTTGTAGTTCAAGAGCATAATGATCGGGCGTTCACATGCGTGTGTCAGATGT<br>GCCACCTCGAACCTTGTTAGGATGTTGGCACATTACCTGTCTGACA                                      |  |
| x1            | 6784096-76784199   |    |        |      |   |                                                                                                                                                  |  |
| ex3_58_46874_ | CM000_665.2/1      | 33 | 9E-14  | 65.9 | 1 | ATACTTTTATAGTTCATAAGTCTGATGATTGGGTGTCATGCTCATGTGTGAGACATGC<br>CTCCCTTAAGCCTTGTTATGACGTGAGCATATTACCTGTCTAGATA                                     |  |
| x1            | 22750372-122750475 |    |        |      |   |                                                                                                                                                  |  |
| ex3_58_48062_ | CM000_671.2/8      | 14 | 0.008  | 28.2 | 1 | GTGCCCTTTTAAGGTAGACGCAGTTTCGTAAGAGGCTAACACATAAGGGTAAATTAA<br>AGTAAGTCTCCATAAAACCCAGAGAAGAGACAGAAGAGACTGTGAAACTCCTCTTTG<br>GACCCCATCTGGAGCCACAGCA |  |
| x1            | 7260450-87260585   |    |        |      |   |                                                                                                                                                  |  |
| ex3_58_48551_ | ENST0_000038       | 15 | 0.002  | 30.2 | 1 | TGGTAATTACCAAGATTTTTAGAATGCAGTTTCTCATTTGCCAGGGAAATGACCATAA<br>AA                                                                                 |  |
| x1            | 4049.1             |    |        |      |   |                                                                                                                                                  |  |
| ex3_58_48805_ | ENST0_000038       | 25 | 3E-09  | 50.1 | 1 | CTGGCACTTTTCACAGTTCCTTCCCCAGGCAGTGGGGCCAGGATTTGGTAGCTGGTG<br>CTGA                                                                                |  |
| x1            | 4028.1             |    |        |      |   |                                                                                                                                                  |  |
| ex3_58_49416_ | ENST0_000057       | 15 | 0.005  | 30.2 | 1 | GCCGTGTGAGGCCACCTCTGCCATGCTGCAGGCTCCCCAGCACGCAGTGGGGAAC<br>CCAAC                                                                                 |  |
| x1            | 9216.1             |    |        |      |   |                                                                                                                                                  |  |
| ex3_58_50908_ | ENST0_000039       | 14 | 0.008  | 28.2 | 1 | ATACTATGATGTTTGCATAGTTCAGCAGATTGAATTATGAAGAGATCTACCATTTGTCT<br>G                                                                                 |  |

|                        |                                                    |    |       |      |   |                                                                                                                                         |  |
|------------------------|----------------------------------------------------|----|-------|------|---|-----------------------------------------------------------------------------------------------------------------------------------------|--|
| x1                     | 1113.1                                             |    |       |      |   |                                                                                                                                         |  |
| ex3_58<br>51752_<br>x1 | AC026<br>355.13/<br>69334-<br>69207                | 14 | 0.009 | 28.2 | 1 | UUUGAGGUCUUUCCCGAUGGGACUUUUCUGUAGGCUGCACAUCAUUGGAAACGC<br>CUCAUAGAGUUAACUCUGUGUUUUACUUUACUCACAGGACUCUUGUUAGAUCUG<br>UGGGAACUACAAGACAGUU |  |
| ex3_58<br>54331_<br>x1 | CM000<br>668.2/1<br>186518<br>-<br>118662<br>0     | 14 | 0.009 | 28.2 | 1 | GTTCTTTTGTGGTTCATAAGTGTGATGATTGGGTTTTTTGCTCATGTGTGAGATGTGC<br>CTCCCTCAAACCTCGTTATGATGTCGGCACATCACCCATCTGACT                             |  |
| ex3_58<br>54515_<br>x1 | ENST0<br>000036<br>3336.1                          | 19 | 0.002 | 30.2 | 1 | GTTTCTGATGAAGCCTATGTTGGTAGAGACATCTGAGAGTATTGATGAATGCCAACA<br>GCT                                                                        |  |
| ex3_58<br>54758_<br>x1 | ENST0<br>000036<br>3193.1                          | 15 | 0.006 | 30.2 | 1 | TGGGCCCTTTCACAGGCCCTCCCCTCGGCAGTGGGGCCAGGATTGGGTTGCTGGT<br>GCTGA                                                                        |  |
| ex3_58<br>55486_<br>x1 | CM000<br>668.2/1<br>009571<br>60-<br>100957<br>263 | 15 | 0.002 | 30.2 | 1 | ATCCTTTTGTAAATTTATAAGCATCATGGTTAGGATTTAATGCTCATATGTGAGCTGAGC<br>CTCCCTCAAACATTGTTAGGACATCAACACAATACCAGTCTGATA                           |  |
| ex3_58<br>55701_<br>x1 | CM000<br>664.2/1<br>203037<br>2-<br>120303<br>03   | 21 | 7E-07 | 42.1 | 1 | TGTGTATGATGAGATTTCACTTCATGGTCTGTGTTTCTGAAACACATGATGTTGTGGA<br>AGTTCTGATTTG                                                              |  |
| ex3_58<br>55957_<br>x1 | CM000<br>666.2/7<br>326396<br>0-<br>732640<br>84   | 19 | 0.003 | 30.2 | 1 | TCTGAGACTAGAGTCACATCCTGACACGGCTCTTCTCCAATGTGCTGGAGTCCTCAG<br>CATCTGCTGGTCTTGATTCACTGATGGGGGCAACCAGTGTCCCCTTAAGTGTCCGGG<br>CAGAAACATAC   |  |
| ex3_58<br>56973_<br>x1 | CM000<br>670.2/2<br>775512<br>2-<br>277550         | 14 | 0.008 | 28.2 | 1 | ATCCTTCTGTAGTTTATGAGTGTGATGATTGGCTGTTTCATGTGCATGTATGAGATGTG<br>CCACCCTTGAACCTTGTCATGTCTGATGTGAAA                                        |  |

|                        |                                                          |    |            |      |   |                                                                                                                                    |
|------------------------|----------------------------------------------------------|----|------------|------|---|------------------------------------------------------------------------------------------------------------------------------------|
| ex3_58<br>60465_<br>x1 | 32<br>CM000<br>673.2/1<br>020584<br>08-<br>102058<br>305 | 15 | 0.005      | 30.2 | 1 | ATCCTTTTGTAGTTTATGAGCATGATGACTGGGTTTTTCACAGGTATGTGTGAGATGTG<br>CCATCCTCGAACCTTGTTATGATGTGCGGCATATTGTCAGTCTGACA                     |
| ex3_58<br>62695_<br>x1 | CM000<br>680.2/1<br>253352<br>5-<br>125334<br>24         | 15 | 0.003      | 30.2 | 1 | ATCCTTTTGCAGTTCCTAAGCGTGATGATTGGATATTCACACTTGTGTGCGAGATGTT<br>CCTTTTTCTAAACCTTGTTATGTCAGCACATTACTCATCTGATG                         |
| ex3_58<br>62811_<br>x1 | CM000<br>673.2/8<br>284388<br>5-<br>828439<br>85         | 14 | 0.008      | 28.2 | 1 | AACCATGAATGCAAGAAGCGTATGATTGGGTTTTTCATGCTCACGTGTGAAATGGACC<br>ACCCTCAAACCTGGTTATGCTATCAGCACATTACCTGTCTGATG                         |
| ex3_58<br>63197_<br>x1 | ENST0<br>000036<br>5172.1                                | 30 | 4E-12      | 60   | 1 | TGTCCTGATGATACTTGTAAATAGGAAGTGCCGTCAGAAGCGATAACTGACGACGTCT<br>AAT                                                                  |
| ex3_58<br>63333_<br>x1 | ENST0<br>000045<br>8838.1                                | 25 | 3E-09      | 50.1 | 1 | CTGGAAAAGACAATGATGTTTTATTTCCAAGCACATATCTGAGTTGTATGTGTGGACA<br>GC                                                                   |
| ex3_58<br>63586_<br>x1 | CM000<br>665.2/9<br>042623<br>5-<br>904263<br>56         | 20 | 0.000<br>8 | 32.2 | 1 | AAGACTGTACTTTTCAGGGATCATTCTATAGTTTGTACAAAAAGAGTGCTTCAAACCT<br>CCTCTACCAAAGGAAGGTTCAACTCTTTGAGTTGAATGCACACATAAAAAAGAAGTT<br>TCTGA   |
| ex3_58<br>64527_<br>x1 | AC021<br>733.12/<br>63797-<br>63917                      | 15 | 0.002      | 30.2 | 1 | GGUAAUUACCAAGAUUUUUUAGAAUGCAGUUUCUCAUUUGCCAGGGAAAUGACCAU<br>AAAAUAAUUUCCACUAGAUUUUUUUUAUCUGUUACCUUGCUAGCAAGCAGUCUAU<br>UGGGAACAUUU |
| ex3_58<br>65462_<br>x1 | CM000<br>663.2/1<br>502616<br>94-<br>150261              | 14 | 0.009      | 28.2 | 1 | ATCCTTTTGTAGTTCATGGGCATGATGATGGGGTGTTCCTGAGCATGCGTAAGATGT<br>GCCGCCCTCAAATCTTGCAAGATGTTGGCACATTACCCATCTGACA                        |

| Accession       | Gene                                           | Length | Score | Start | End | Sequence                                                                                                                                                                                                                       |
|-----------------|------------------------------------------------|--------|-------|-------|-----|--------------------------------------------------------------------------------------------------------------------------------------------------------------------------------------------------------------------------------|
| ex3_58_65739_x1 | ENST0000408163.1                               | 15     | 0.004 | 30.2  | 1   | GGGATGTGCTCAGAGCAGGGGGCCTGAGGAATGGCTCCTCTGTTTACAACACACCC<br>AACA                                                                                                                                                               |
| ex3_58_66728_x1 | CM000685.2/4<br>028509<br>6-<br>402851<br>99   | 14     | 0.009 | 28.2  | 1   | ATCCTTTTATGGTTCATAAGTATGTTGATTATGTTTTTCATGCTATTGTGTGAGATGTAC<br>CTCCCTCAAACCTTGTTATGATGTCAGCACATTATCCATCTGATG                                                                                                                  |
| ex3_58_67733_x1 | CM000668.2/1<br>214436<br>17-<br>121443<br>693 | 19     | 0.004 | 30.2  | 1   | AAGACTATACTTTTCAGGGATCATTCTATAGTTTGTACTAGAATGTAAATAAACTTAG<br>TGATGAATTACTATAAGC                                                                                                                                               |
| ex3_58_68192_x1 | CM000669.2/1<br>076033<br>63-<br>107603<br>507 | 15     | 0.003 | 30.2  | 1   | CTGCATGTGGAAATGTCTGTTCTTCATTCTTTTAGGAGCAGGAATACATATAGATATA<br>AAAAACATCCCATATTTTAAAAGGAATTCTTAGGGCTTGCCAATCTTGTAGTAAAGGT<br>TGAATTAGCAGTATATGTCTTCTACATAA                                                                      |
| ex3_58_68586_x1 | CM000682.2/3<br>842177<br>4-<br>384216<br>47   | 14     | 0.008 | 28.2  | 1   | TCTTGATCCAAAAGTGATCATGGGTTGCCTGTGTCCCGATCATTAACAGTGCAGGG<br>GTAGGAGTGCTGAAAGACATCTTCCCTGCGTTGGTCCAGCCTTCCCTTTCAAACCCT<br>GGAGCTTCCACG                                                                                          |
| ex3_58_70717_x1 | CM000667.2/1<br>230096<br>40-<br>123009<br>542 | 15     | 0.003 | 30.2  | 1   | ATCCTTGTGTAGTGCATAAGTGTGATGACTGGGTTTTCCCACTCTTGTGAGGTGTGC<br>CTCCTGCAAATCTTATGATGTCTGCATATGACTTGTTTGACA                                                                                                                        |
| ex3_58_75145_x1 | CM000665.2/9<br>003028<br>4-<br>900304<br>95   | 15     | 0.006 | 30.2  | 1   | AAGACTATTCTTTCAGGGATCATTTTTATGCTTTGTTACTAGAAGTTTCTCTGAAAGTGT<br>AGAGCACCATCAACTATGGGAAAGGGGCACAGCATTGTCTCCTAAGCATGAAGCCA<br>GCTCTCTGTGTTGTGTTGCTGCAACTGCACTTGGTATTGATGATCATTCTTCCCTC<br>CCTCAAAGAATAAGAGGGGAGGATGAAGTCTGAGAGGT |

|                        |                                                  |    |       |      |   |                                                                                                                                                       |
|------------------------|--------------------------------------------------|----|-------|------|---|-------------------------------------------------------------------------------------------------------------------------------------------------------|
| ex3_58<br>77178_<br>x1 | AC015<br>550.19/<br>39913-<br>40054              | 15 | 0.004 | 30.2 | 1 | CUGCAGCCUAAUUAAGCCAACUGAGUJCCUJCCUCAUGGGGGGGCCAGUGUGC<br>AAUGGCUGCAAACAGCAGCUUCCUUGGUAGUGUAUGCAGCCUGUGUGUUGUAAU<br>GUAUGGGUUGCUCUAAGGGACCCUGGAGACAGUC |
| ex3_58<br>79588_<br>x1 | CM000<br>679.2/8<br>214166<br>3-<br>821417<br>73 | 14 | 0.009 | 28.2 | 1 | ATCCTTTTGTGGTTCATCCGCCTGATGATTGGGTTTTTCATGCAGACGTGTGAGCTGT<br>GCCTCCCTCAAGCCTTGTTACAACATCCGACATCCGCACATTACCTGTCTGATG                                  |
| ex3_58<br>80522_<br>x1 | ENST0<br>000039<br>1236.2                        | 18 | 0.009 | 28.2 | 1 | AAGACTATTCTTTCAGGGATCATTATGCGAGAAGTTTTTCTGAATGCCTAAAGAACCA<br>GA                                                                                      |
| ex3_58<br>80649_<br>x1 | ENST0<br>000036<br>4796.1                        | 14 | 0.009 | 28.2 | 1 | CAGCCTCTGATGAAATTTATCTTGATAGGGACATCTGAAAGTGTGATGAATGCCAAG<br>GA                                                                                       |
| ex3_58<br>80930_<br>x1 | CM000<br>667.2/5<br>685714<br>0-<br>568572<br>51 | 14 | 0.008 | 28.2 | 1 | AACATTTAATTGCAGTAATTCATAAGTGTAATGATTGGGTTTTCACATGCATGCATAAG<br>ATGTGCGTTTTCTCCAACCTTTGTTACAGTGTCAGCATGTTATCCTCATTGACA                                 |
| ex3_58<br>80976_<br>x1 | ENST0<br>000036<br>3694.1                        | 15 | 0.004 | 30.2 | 1 | GGGTCAATGATGAGAATCTTATATTGTCCTGAAGAGAGGTGATGACTTAAAAATCATG<br>CT                                                                                      |
| ex3_58<br>82114_<br>x1 | CM000<br>664.2/5<br>701616<br>4-<br>570160<br>61 | 15 | 0.004 | 30.2 | 1 | ATATTTTTGTGATTCATAAGTATAATGATGGAGTTTTCAAATTCACGTGTGTGATGTGC<br>CCCCCTCAAACCTCTTTATGATGTCAGCATATTGCTCATCTGACA                                          |
| ex3_58<br>82235_<br>x1 | CM000<br>677.2/2<br>506233<br>3-<br>250624<br>27 | 14 | 0.009 | 28.2 | 1 | GGATCGATGATGAGTCCCCATAAAAACATTCTTGAAAAGCTGAACAAAATGAGT<br>GAGAACTCATACCGTCGTTCTCATCAGAACTGAGGTCC                                                      |
| ex3_58<br>84010_<br>x1 | ENST0<br>000036<br>3243.1                        | 15 | 0.002 | 30.2 | 1 | GGCCTCCTGGTGCTTACCAAGGCTGTCTTCTTACACTGACTGAAGCAGAGAAAGAGG<br>AAG                                                                                      |

|                        |                                                    |    |            |      |   |                                                                                                                                               |
|------------------------|----------------------------------------------------|----|------------|------|---|-----------------------------------------------------------------------------------------------------------------------------------------------|
| ex3_58<br>85653_<br>x1 | CM000<br>664.2/1<br>830643<br>46-<br>183064<br>235 | 14 | 0.008      | 28.2 | 1 | GCAGACTCCCTCAGCATCCAGCGGGTGCTTTTTCGGTCTGCCAGTGAGCATTCCATG<br>GTGCTGTGACCATTTTGACCTCTCTAGGGTGATGCAGCTGCCTGGGGACACAGAG                          |
| ex3_58<br>85789_<br>x1 | CM000<br>675.2/3<br>410083<br>8-<br>341007<br>11   | 18 | 0.008      | 28.2 | 1 | AGATAACTTCAAAGAGGGCTTGCGGAGCTGCAAAACCAAGAGCTTTTAATGTATTACT<br>GAATATTGAAGTTCTCCGTAGGATGCCATAGTCACTCAGTAGTGCTATATCTTCCTAA<br>GCAGATATAAGA      |
| ex3_58<br>86497_<br>x1 | AL132<br>709.5/1<br>45774-<br>145703               | 14 | 0.008      | 28.2 | 1 | UAGAUCAGUGAUGACUACUGUUGGUGUAUGAGUCAUUAUACGAUGAAUACAUGUCU<br>GAAAUUCUGAGGUCCAA                                                                 |
| ex3_58<br>87684_<br>x1 | CM000<br>670.2/5<br>913750<br>2-<br>591373<br>72   | 15 | 0.005      | 30.2 | 1 | AGCCTCCTGGTGTTTTAACACAGCTGTGTTCTTATACTGACTGTGTAGAAAGAGAAGG<br>AAATAAACCTTACCCCATATGCATTTTCATCCCCGGACCCTGCACCTCGTCTATATTGT<br>GAATAGGGAAATATGG |
| ex3_58<br>87898_<br>x1 | CM000<br>664.2/2<br>186198<br>01-<br>218619<br>887 | 16 | 0.001      | 32.2 | 1 | AAGACTACACTTTCAGGGATAATTTCTATAGTTCATTACTAGAGAAGTTTCTCTGAATG<br>TGTAGAGCACCATAAAATACATTTTATT                                                   |
| ex3_58<br>88397_<br>x1 | ENST0<br>000040<br>8534.2                          | 25 | 3E-09      | 50.1 | 1 | GAGACTATACTCTCAGTGACCAGTTCCTGAGTTCATTACTAGAGAAGTTTCTCTGAAC<br>GT                                                                              |
| ex3_58<br>89235_<br>x1 | AC013<br>416.4/5<br>4383-<br>54515                 | 16 | 0.000<br>7 | 32.2 | 1 | UGGCAGCCAUGUCAAAUUCAGUGCCUGCCCUGUCUAUGGUAGGCACUGGCCCCAG<br>AAGACUGCCACAGAAACAGUGACUCACAGGCCUGUUACUGUGUCCCAGGCUCAG<br>GGAUAAAUUUGGUUACAGACACCA |
| ex3_58<br>89275_<br>x1 | CM000<br>667.2/8<br>750719<br>7-<br>875073         | 15 | 0.003      | 30.2 | 1 | AAGACTACACTTTCAGGGATTATTTCTATAGTTCATTCTAGAGAAATTTCTCTGAACA<br>TGTAGAGCATGAAAACTAATTATGGAAAGGGAAGACCATTACCAGCCAGT                              |

|                        |                                                    |    |            |      |   |                                                                                                                                                      |  |
|------------------------|----------------------------------------------------|----|------------|------|---|------------------------------------------------------------------------------------------------------------------------------------------------------|--|
|                        | 06                                                 |    |            |      |   |                                                                                                                                                      |  |
| ex3_58<br>90134_<br>x1 | CM000<br>672.2/2<br>678901<br>7-<br>267891<br>57   | 14 | 0.009      | 28.2 | 1 | CCTCATTTCCTTGGCAGGAACTTGTAGTCCCCTCCCTGTTATGTACAGAGGCAAAG<br>GGAAGAGCTCTGGCCCCCTTGGCATGTCTTTGGAGCCATGCAGCTTCCCGTCTGCC<br>AGTTCTATCCTCAAGCACCAGGACACCA |  |
| ex3_58<br>90637_<br>x1 | CM000<br>663.2/1<br>192590<br>41-<br>119259<br>141 | 14 | 0.008      | 28.2 | 1 | ATTCTTTTGTAGTTCAAGAGTGTGATGATTGGCTGTTTCATGAGCATGTATGAGATATG<br>CCACCCTTGAACCTTGTTACATCAGCACATTATCTGCCTTACC                                           |  |
| ex3_58<br>91156_<br>x1 | ENST0<br>000036<br>2701.1                          | 14 | 0.009      | 28.2 | 1 | TTGGGCAGTGAACACCCAAGTGTGCTTTATAGTTCCTTTGGCTTTGACTTTGTGCTAG<br>AG                                                                                     |  |
| ex3_58<br>91501_<br>x1 | ENST0<br>000051<br>6599.1                          | 20 | 0.000<br>5 | 32.2 | 1 | TGTCAGTGATGAAAGCTTAGTCCCGTTCTGCTACTAATGTTAAGTGATGATAAAGTTA<br>TG                                                                                     |  |
| ex3_58<br>91640_<br>x1 | ENST0<br>000036<br>5313.1                          | 14 | 0.008      | 28.2 | 1 | TTACCAAAAGTTAATGTTTTAGAGAATGCTTTGGTTAAAAGCCTTTACCAACTTGG<br>GC                                                                                       |  |
| ex3_58<br>92907_<br>x1 | AC016<br>708.11/<br>153795<br>-<br>153929          | 43 | 1E-19      | 85.7 | 1 | CUGCAGCCAAUUAAGCCAACUGAGUUCUUCUUGUGGGGGCCAGUGUGCAA<br>UGGCUGCACACAGCAGCUUCCUUGGUAGUGUACACAGCCUGUUGGUUGUAUGGG<br>UUGCUCUGAGGGACCUUGGAGACAGGC          |  |
| ex3_58<br>95935_<br>x1 | ENST0<br>000039<br>1284.1                          | 15 | 0.002      | 30.2 | 1 | ACCTCTGCTGGGGTGTTTAAAGGTCAGCGCTGTAGATATTCAGCATCTGGCATCTTG<br>GCT                                                                                     |  |
| ex3_58<br>96177_<br>x1 | CM000<br>680.2/2<br>226057<br>6-<br>222606<br>77   | 15 | 0.002      | 30.2 | 1 | ATCTTCTGTGGTTTCTAAGTGTGATGATTGGGTTTTACACAGTTGTGTGAGGTGTGC<br>CACCTCAAACCTTGTTATGACGTCGACACTTACCCATCTGACA                                             |  |
| ex3_58<br>97252_<br>x1 | ENST0<br>000036<br>5473.1                          | 14 | 0.009      | 28.2 | 1 | TAGGCCCTGAATCAAGAAACGTGATGGTTTGCCATTGTAGCTATTGGTTTCAAACAAG<br>AG                                                                                     |  |
| ex3_59                 | ENST0                                              | 18 | 7E-05      | 36.2 | 1 | GGGTCGATGATGAGAACCTTATATTTTCCTGAAGAGAGGTGATGACTTAAAATCATG                                                                                            |  |

|        |                                |    |       |      |   |                                                             |
|--------|--------------------------------|----|-------|------|---|-------------------------------------------------------------|
| 00043_ | 000060                         |    |       |      |   | CT                                                          |
| x1     | 6510.1                         |    |       |      |   |                                                             |
| ex3_59 | ENST0                          | 14 | 0.009 | 28.2 | 1 | TGCACTGCATGGCATCTGCACCCAGCAGTTTACTCTTGCTAAGGTGTTCAAAGGTCA   |
| 00165_ | 000038                         |    |       |      |   | GTG                                                         |
| x1     | 4679.1                         |    |       |      |   |                                                             |
| ex3_59 | AC023                          | 14 | 0.009 | 28.2 | 1 | AGCCUCAUUCUAGAUGAGAAUGGGUACUGCUGAUCUAGGUGUCCAAAAACUUUA      |
| 00265_ | 271.11/                        |    |       |      |   | UGUGGCUAAAUUGAGACACAGGCUAUGCUUCCAUCACAGUACACAUUUGCAGUG      |
| x1     | 39009-<br>38876                |    |       |      |   | GUGACAAUGAAACCGUAACAUUU                                     |
| ex3_59 | CM000                          | 15 | 0.002 | 30.2 | 1 | ATCCTTTTGTGGTTGATAAGTGTGATGATTCAGTTTTTCATGCTCATGTATGAGATGTG |
| 01289_ | 665.2/3                        |    |       |      |   | CCCCAATCAAACCTTGTCACAACATCTGCTTATTATCAGACA                  |
| x1     | 217265<br>6-<br>321727<br>55   |    |       |      |   |                                                             |
| ex3_59 | CM000                          | 15 | 0.002 | 30.2 | 1 | CTGGAGACTAAGAAACCAGTCCTTGAAGTCAAGCTGACTCTGCTTTTAGCCTCCTAA   |
| 03130_ | 682.2/4                        |    |       |      |   | ATTAAGATAGATAGAATAGGTCTTGTTTGCAAATAAATTCAAGATCTACTCATCTA    |
| x1     | 330455<br>5-<br>433046<br>79   |    |       |      |   | TCAATAGCA                                                   |
| ex3_59 | AL132                          | 22 | 4E-05 | 36.2 | 1 | UGGAUCGAUGAUGACUACUGGUAGCAUGAGUCAUUAACAGUGAAUACAUGUCUGG     |
| 03433_ | 709.5/1                        |    |       |      |   | AACUCUGAGGUCUGU                                             |
| x1     | 31508-<br>131439               |    |       |      |   |                                                             |
| ex3_59 | ENST0                          | 14 | 0.009 | 28.2 | 1 | AGCCTCATTCTAGATGAGAATGGGTACTGCTGATCATGGTGTCCAAAAAAGTTTATGT  |
| 05623_ | 000036                         |    |       |      |   | GG                                                          |
| x1     | 5189.1                         |    |       |      |   |                                                             |
| ex3_59 | CM000                          | 15 | 0.005 | 30.2 | 1 | GTTTCTGATGAAGCCTATGTTGGTAGAGACATCTGAGAGTATTGATGAATGCCAACA   |
| 06161_ | 677.2/8                        |    |       |      |   | GCTTAAATGGAGAAAA                                            |
| x1     | 617327<br>0-<br>861731<br>98   |    |       |      |   |                                                             |
| ex3_59 | CM000                          | 18 | 5E-05 | 36.2 | 1 | AGTCTTTTGTAGTTTGCAAGCATGATGATTCGGTTTTGAGAGGTGCCTCCCTCAAACC  |
| 06892_ | 665.2/1                        |    |       |      |   | TTGTAGACGTCGTCATCGGCACATTACCTGCCTGATG                       |
| x1     | 973395<br>51-<br>197339<br>457 |    |       |      |   |                                                             |

|                        |                                                    |    |            |      |   |                                                                                                                                                                                                                                      |
|------------------------|----------------------------------------------------|----|------------|------|---|--------------------------------------------------------------------------------------------------------------------------------------------------------------------------------------------------------------------------------------|
| ex3_59<br>07171_<br>x1 | ENST0<br>000036<br>5612.2                          | 19 | 0.003      | 30.2 | 1 | AGGGCTATACTTTCAGGGGTAATTTCTATAGTTCATTACTAGAGTAGTTTCTCTGAAT<br>GT                                                                                                                                                                     |
| ex3_59<br>09573_<br>x1 | CM000<br>670.2/1<br>232667<br>45-<br>123266<br>642 | 15 | 0.003      | 30.2 | 1 | ATCCTTTTGTAGTTCCTTAAGTGTGATGATTGGGTTTTTCATGCTTATGTGTGAAATGTGC<br>CTTTCTCAAACCTTGTTATGACACTGGCACATTACCTGTGTGACG                                                                                                                       |
| ex3_59<br>10185_<br>x1 | ENST0<br>000039<br>1209.2                          | 15 | 0.004      | 30.2 | 1 | AAGACGATACTTTCAAGAATCATGATCATTCTATACAGTTCATTACTAGAAAAGTTTCT<br>C                                                                                                                                                                     |
| ex3_59<br>10686_<br>x1 | CM000<br>666.2/1<br>595070<br>29-<br>159506<br>894 | 17 | 0.000<br>3 | 34.2 | 1 | GCGAGGAGGAGGCACAGGGTTCTCCCCTGAGAGCCAGGCCAGCTCTTAGTGTGTTGCT<br>TCGCTGCAGGTGCCATTTGGCATTGAGGATTGTTTTTCTCTTCCTCCGGCAAAGTAA<br>GAGGGAGAGGACACAGTCTGAGT                                                                                   |
| ex3_59<br>10973_<br>x1 | CM000<br>679.2/1<br>906413<br>6-<br>190639<br>20   | 31 | 1E-12      | 61.9 | 1 | AAGACTATACTTTCAGGGATCATTCTATAGTGTGTTACTAGAGAAGTTTCTCTGAAC<br>GTGTAGAGCACCGAAAACCCCGAGGAAGAGAGGTAGCGTTTTCTCCTGAGCGTGAA<br>GCCGGCTTTCTGGCGTTGCTTGGCTGCAACTGCCGTCAGCCATTGATGATCGTTCTT<br>CTCTCCGTATTGGGGAGTGAGAGGGAGAGAACGCGGTCTGAGTGGT |
| ex3_59<br>13585_<br>x1 | CM000<br>668.2/1<br>170981<br>9-<br>117099<br>60   | 15 | 0.002      | 30.2 | 1 | ATCCAAGGTGAGTCTCTCTCCAAGGGGCTGACTAGTGCCTCTCTTAGGACAGTAGCA<br>AGTTGGAATAAAAATCTGGCATGCCTAAGGTCTTTAAGGAACAGGGGATGCTTACTTC<br>TTTTGCGTTCCTCTGGCGGCCTACATAG                                                                              |
| ex3_59<br>15019_<br>x1 | ENST0<br>000039<br>1215.1                          | 19 | 0.005      | 30.2 | 1 | GTTCCCTTTTAAGGCTGACCCAGTGCTTTAAGAGGCTGATACAGAAGGGTAAAGTTA<br>AGT                                                                                                                                                                     |
| ex3_59<br>16454_<br>x1 | AJ2432<br>22.1/1-<br>109                           | 14 | 0.008      | 28.2 | 1 | UCCCAAUGAUGAGUUGCCAUGC UAAUACUGAGCCACCAGGUAGGGCAGUGUUGCC<br>UGGUUUGGGUGCCAGUGAGUUUAACAAAACUUCUCACAUGAAGAUCUGAGGGGU                                                                                                                   |
| ex3_59<br>18008_<br>x1 | CM000<br>665.2/1<br>322806<br>18-                  | 14 | 0.008      | 28.2 | 1 | ATCCTTTTGTAGTTCATAACAGTGATTACTGGGTTTTTCACGTTTCATGTGTGAGATGTG<br>CCTTTCTTTTTTTTTGTT                                                                                                                                                   |

|                 |                            |    |        |      |   |                                                                                                                                                                                                                               |  |
|-----------------|----------------------------|----|--------|------|---|-------------------------------------------------------------------------------------------------------------------------------------------------------------------------------------------------------------------------------|--|
|                 | 132280                     |    |        |      |   |                                                                                                                                                                                                                               |  |
|                 | 693                        |    |        |      |   |                                                                                                                                                                                                                               |  |
| ex3_59_18053_x1 | AC104_446.2/1_42006-142080 | 20 | 0.0005 | 32.2 | 1 | CAUGGGUGAGGUACGAGGAAACAGUCUGAUAGUCACUGAAGACUGAUUAGA UCCA ACUCUGAUCUCAGCAAAGCC                                                                                                                                                 |  |
| ex3_59_18100_x1 | ENST0_000038_4470.1        | 14 | 0.008  | 28.2 | 1 | TCTTAGTGATGAAAAC TTTGTCCAGTTCTGCTAATGACTTTAAGTGATGATAAACTATG T                                                                                                                                                                |  |
| ex3_59_18305_x1 | ENST0_000038_3920.1        | 15 | 0.004  | 30.2 | 1 | TAGGCCCTGAATCAAGACTAGTGTTTTGCTGTAGCTGTTGGTTTCAAACAGGATCCG AGA                                                                                                                                                                 |  |
| ex3_59_18726_x1 | ENST0_000038_4225.3        | 23 | 4E-08  | 46.1 | 1 | GCACTGCCTTTGAACCTGATGTGTCTTGT TTTGTAGCTTCACGGGCCAAGCAACAGTG CTA                                                                                                                                                               |  |
| ex3_59_18866_x1 | CM000_673.2/6_643276       | 15 | 0.006  | 30.2 | 1 | GATGCCTTCCGGAACATGCCAGCACCGCAGATGCTGGCAGTCTGCTGTGCCCGTGA TATTGGGCAAAGAGGAAGTGGCTATTTCTACACTTGGTGTT CAGAAACCAGTGAGCT CTAAGAATGGTTTATAGCCTGACATTT                                                                               |  |
|                 | 3-66432902                 |    |        |      |   |                                                                                                                                                                                                                               |  |
| ex3_59_20097_x1 | AC016_710.7/5_8672-58803   | 15 | 0.002  | 30.2 | 1 | CUGUGAAUAUUCUCUGUGUUCUGAUUAUGUGAGAGCCAGGACAGGC UAAACAUUU GCUACAUUAAGACCAUGCAUGUGUACCCAGAUGUAGCCCAU UCCCUAGCUCUGGU CUUAUAAAUGCUGGUGAUAAAC                                                                                      |  |
| ex3_59_21333_x1 | CM000_677.2/5_939020       | 15 | 0.006  | 30.2 | 1 | ATCCTTTTGTAGTT CATAAGCGTGATGACTGTGGTTTCATGCTTGTGTGTGAGAGATG GGTGGGCCTCCCTCAAACCTTGTTACGACGTAGGCCCAT TACCCATCTGACA                                                                                                             |  |
|                 | 8-59390317                 |    |        |      |   |                                                                                                                                                                                                                               |  |
| ex3_59_22272_x1 | CM000_669.2/1_022279       | 14 | 0.009  | 28.2 | 1 | AAGATGATACTTT CAGTGATCTTTTTTTCAGTTTATTACTAGAAAAGTGTCTCTGAACCT GGAGAGCACCCAGAAACCAAGAGGAGGAGATGTAGCGCTCTCTCTCTGAGCTTAAAGC TGGCTCTTGGTTTTGCTTTGCTGCAACTGCTTTTTGCCATTGATGATCATTCTTCTCTT CCTCTGGGAAGTAAGAGAGAGAAGATGCAGCACGAATGGT |  |
|                 | 7-10223011                 |    |        |      |   |                                                                                                                                                                                                                               |  |
| ex3_59_22571_x1 | ENST0_000060_6412.1        | 20 | 2E-06  | 40.1 | 1 | TGGATCAATGATGACCACTGGTGGCGTATGAGTCATATGTGATGAATACGTGTCTGG AAC                                                                                                                                                                 |  |

|                        |                                                    |    |       |      |   |                                                                                                                                                      |
|------------------------|----------------------------------------------------|----|-------|------|---|------------------------------------------------------------------------------------------------------------------------------------------------------|
| ex3_59<br>23429_<br>x1 | CM000<br>674.2/8<br>886664<br>3-<br>888667<br>63   | 16 | 0.001 | 32.2 | 1 | TGTCTCTGACCTGGTTAAAGTGGCATCTGGTTGGTGGCACTTATCTCAAATCGCAA<br>GACATAAGGCAACCTCTTGTATCCAGCTTGGCTTTTTGTTTTTGTAGACA<br>GGGTC                              |
| ex3_59<br>23758_<br>x1 | CM000<br>663.2/1<br>530126<br>14-<br>153012<br>482 | 14 | 0.008 | 28.2 | 1 | ATGCATCTATCTGACATGCCTGGAGCAGGTATTGTCTGCTGCTAAAGTTTCCACCAC<br>AGATGCAAGAAGAAAATGTCCTCATGCTTTTTGTCTGTGATTGTGGCAGCCAAGATT<br>GACTAGAGGAATGCAGAG         |
| ex3_59<br>25488_<br>x1 | CM000<br>685.2/2<br>892406<br>9-<br>289241<br>38   | 14 | 0.009 | 28.2 | 1 | CAGCCTCTGATGAAATTTATCTTGATAGGGACATCTGAAAGTGTGATGAATGCCAAG<br>GACTCTAATGGA                                                                            |
| ex3_59<br>25809_<br>x1 | CM000<br>665.2/1<br>805427<br>01-<br>180542<br>836 | 14 | 0.008 | 28.2 | 1 | TGGTCAGGTGGAATAATCCTTATCTGTTTCTCCTTTTGAAGGGCAGATTAGAACATGA<br>TAATTGGAGTTCACATGATACATGATTAAAGTCTCTGTGTAATCATGACTTACAATATC<br>CTGATTATTCCTATCTTAT     |
| ex3_59<br>25891_<br>x1 | CM000<br>677.2/6<br>569693<br>6-<br>656968<br>33   | 28 | 6E-11 | 56   | 1 | ATCCTTTTGTAGTTTATGAGCATGATGATTGGGTATTCATCCATGTTTGTGAGATGTG<br>CCACCCTTGAACCTTGTTACGACATCAGCACATTACCCATCTGACC                                         |
| ex3_59<br>26019_<br>x1 | CM000<br>669.2/3<br>741962<br>8-<br>374197<br>67   | 15 | 0.002 | 30.2 | 1 | GGCCTCCTGGTGCTTACCAAGGCTGTCTTCTTACACTGACTGAAGCAGAGAAAGAGG<br>AAGCAGAGTAAACCTATACCATGTGCACCTCAGCCCAGGCCCTGTGTGTGTGCCTG<br>GTCTGTATTGTAAATGCAGGGAAATGG |
| ex3_59<br>27339_<br>x1 | CM000<br>675.2/2<br>096931<br>8-                   | 16 | 0.001 | 32.2 | 1 | ATCATTTTGTACCTTTTAAGCATGACCATTGGGTTTTCACACTCATATGGGAGGTGCC<br>TCCCTCAAACCTTTGTACATTGGCACATGACTCATCTGATG                                              |

|        |         |    |       |      |   |                                                             |  |
|--------|---------|----|-------|------|---|-------------------------------------------------------------|--|
|        | 209694  |    |       |      |   |                                                             |  |
|        | 16      |    |       |      |   |                                                             |  |
| ex3_59 | CM000   | 15 | 0.008 | 30.2 | 1 | GATCCTGGTGATGACAGACGACATTGTCAGCCAATCCCCATGTGGTAGTGAGGACAT   |  |
| 28063_ | 685.2/1 |    |       |      |   | GTCTGCAGTTCTGAAGGGATT                                       |  |
| x1     | 102250  |    |       |      |   |                                                             |  |
|        | 63-     |    |       |      |   |                                                             |  |
|        | 110224  |    |       |      |   |                                                             |  |
|        | 985     |    |       |      |   |                                                             |  |
| ex3_59 | ENST0   | 14 | 0.009 | 28.2 | 1 | ATCCTTTTGTAGTTCGTAAGCATGATGATTGGGTGTTACGTGTATGTGTGAGATGTG   |  |
| 28184_ | 000045  |    |       |      |   | CC                                                          |  |
| x1     | 9180.1  |    |       |      |   |                                                             |  |
| ex3_59 | ENST0   | 23 | 4E-08 | 46.1 | 1 | AAGGCTATACTTTCAGGGATCATTTTTATAGCTTATTACTAGAGGAGTTAATGTGAAT  |  |
| 28629_ | 000039  |    |       |      |   | GT                                                          |  |
| x1     | 1019.2  |    |       |      |   |                                                             |  |
| ex3_59 | CM000   | 16 | 0.000 | 32.2 | 1 | ATCCTTTTGTAGTTCATAAGCCTGATGATTGGATTTTCATGCTCATGTGTGCGATCTT  |  |
| 29429_ | 668.2/7 |    | 9     |      |   | CCTCCCTCAGCCTTGTTAATGTGTTGGCACATTACTCATCTGACG               |  |
| x1     | 586596  |    |       |      |   |                                                             |  |
|        | 4-      |    |       |      |   |                                                             |  |
|        | 758660  |    |       |      |   |                                                             |  |
|        | 66      |    |       |      |   |                                                             |  |
| ex3_59 | ENST0   | 17 | 0.000 | 34.2 | 1 | AATTGGGATCAAAGATGCAGCCGCCTTCCCATTTAAGCAGCACAGACAGCCCAAAGT   |  |
| 30592_ | 000039  |    | 4     |      |   | GAC                                                         |  |
| x1     | 0991.1  |    |       |      |   |                                                             |  |
| ex3_59 | CM000   | 14 | 0.009 | 28.2 | 1 | ATCCTTTTGTAGTTCATGAGTGTAATGATTGAGTGTTTCATGCACATGTGTGAGATATG |  |
| 30896_ | 673.2/8 |    |       |      |   | CCACCCTTGAACCTTGTTACACCGTTGTCACATTGCCCGTTTGACA              |  |
| x1     | 609419  |    |       |      |   |                                                             |  |
|        | 2-      |    |       |      |   |                                                             |  |
|        | 860942  |    |       |      |   |                                                             |  |
|        | 95      |    |       |      |   |                                                             |  |
| ex3_59 | CM000   | 16 | 0.000 | 32.2 | 1 | TGCCCTGACCTGGGAAGAGAGGGGCCTGGCTGGTGGTATCCATCTCATACCAGCT     |  |
| 31930_ | 677.2/2 |    | 8     |      |   | AGGGATGAAGAAACCGCTTGCTCATCCCAGCCTGGCTCCTGGTCTATGCCCATGCC    |  |
| x1     | 600907  |    |       |      |   | TGGTTCGTGCCTTGGACATATCA                                     |  |
|        | 4-      |    |       |      |   |                                                             |  |
|        | 260089  |    |       |      |   |                                                             |  |
|        | 40      |    |       |      |   |                                                             |  |
| ex3_59 | CM000   | 21 | 1E-06 | 42.1 | 1 | AAGACTATACTTTCAGGGATCATTTCTATAGTTTGTACTAGAGAAGTTTCTCTGAACG  |  |
| 32096_ | 681.2/4 |    |       |      |   | TGTAGAGCACCGAGGCATGGGCAAGGACTTCATGTCCA                      |  |
| x1     | 011470  |    |       |      |   |                                                             |  |
|        | 5-      |    |       |      |   |                                                             |  |
|        | 401146  |    |       |      |   |                                                             |  |

|                 |                                                  |    |       |      |   |                                                                                                                                             |
|-----------------|--------------------------------------------------|----|-------|------|---|---------------------------------------------------------------------------------------------------------------------------------------------|
| ex3_59_32114_x1 | CM000<br>667.2/8<br>023958<br>9-<br>802394<br>87 | 15 | 0.005 | 30.2 | 1 | TTCCTTTTTAGTTCATAAGCATGATGATTGGGTTTTTCATGCTTGTCTGTGAGATGTGC<br>CTCCCTTAAATCTTGTGCATGTCGTTGGTACATTACCCATGTGACA                               |
| ex3_59_35128_x1 | AC008<br>474.9/1<br>13719-<br>113587             | 15 | 0.003 | 30.2 | 1 | UUCUCACCUAAAACCCAAGAAUCACUGUUUCUUAUAGCGGUGGUUUAACAGAGGU<br>GCAAACAGCAAGUGAAUCUCGUCGCCUUUGCGGGGCUGUGGCCAUGCCCCUCA<br>AGGAAUUUGGAGGCUCUACAGCC |
| ex3_59_35585_x1 | ENST0<br>000039<br>1249.2                        | 14 | 0.009 | 28.2 | 1 | AAGACTATACTTTCAGGGATCATTCTATAGTTCATTACTAAAGAAGTCTATCTGAACA<br>T                                                                             |
| ex3_59_35779_x1 | AJ6094<br>25.1/1-<br>130                         | 20 | 2E-06 | 40.1 | 1 | UGCCUCAUUCUAGAGAAUGGGCACUGUUGAUCAUGGUGUCCAAAAUAGUUAUG<br>UGGCUAAAUUGAGACAGGUUAUGCUUCCAUCACAGUAUGCAUUAUUGCAGUGGUGA<br>CAAUGAGACCUGUAACAUUU   |
| ex3_59_36599_x1 | CM000<br>681.2/4<br>948996<br>5-<br>494900<br>48 | 20 | 2E-06 | 40.1 | 1 | GAGGTCAGTGATGAGCAACATTCACCATCTTTCGTTTGAGTCTCACGGCCATGAGAT<br>CAACCCCATGCACCGCTCTGAGACCTG                                                    |
| ex3_59_38617_x1 | ENST0<br>000036<br>3219.1                        | 15 | 0.003 | 30.2 | 1 | TGAGCAAGCGATGACAGCCGGTGGTGTGTGAGTCATGGAGGATGAATACTAAGTGC<br>CTGG                                                                            |
| ex3_59_42240_x1 | ENST0<br>000036<br>2500.2                        | 19 | 1E-05 | 38.2 | 1 | TAGTAACACTTCCATGCACCATTTCTATAGTTTCTTACCAGAGAAGTTTCTCTGAACAT<br>G                                                                            |
| ex3_59_42446_x1 | CM000<br>678.2/6<br>831334<br>0-<br>683132<br>39 | 14 | 0.009 | 28.2 | 1 | ATCGTTTTGTAGTTCATAAGCGTGATGACTGGGTGTTTCATGTGCCTGTGTCAGACGT<br>GCCTCCCTCAAACCTTTACTACATTGGCACGTTACCCATTTGAAC                                 |
| ex3_59_42542_x1 | AC090<br>527.3/1<br>7174-<br>17301               | 15 | 0.006 | 30.2 | 1 | UUCACCACUAUUGGUCUGCAGCUCUUCUUAUGGUAGCAGUUGUUGCAUUUCUCU<br>GUGGGAAAAGAAAGAGGAUUAACACCUCUUUCUUAUGCAAAACAGAGAGUAGGCA<br>UAUGUGUGACAGACAAA      |
| ex3_59          | ENST0                                            | 16 | 0.000 | 32.2 | 1 | TGCCTCTGACCTGGGTAGAGTGGCATCTGGCTGTGACATTCATCTCATATCAGCCAG                                                                                   |

|        |         |    |       |      |   |                                                              |
|--------|---------|----|-------|------|---|--------------------------------------------------------------|
| 42546_ | 000039  |    | 5     |      |   | GGA                                                          |
| x1     | 1324.1  |    |       |      |   |                                                              |
| ex3_59 | CM000   | 14 | 0.009 | 28.2 | 1 | ATCCTTTTGCAGTTATGCATAATGACTGGGTTTTACGCTTATGAATGAGATGTGCCT    |
| 42905_ | 664.2/6 |    |       |      |   | CCCTCAAACATTGTTATATGTCAGCACATTATGCATCTGACA                   |
| x1     | 490868  |    |       |      |   |                                                              |
|        | 6-      |    |       |      |   |                                                              |
|        | 649085  |    |       |      |   |                                                              |
|        | 87      |    |       |      |   |                                                              |
| ex3_59 | CM000   | 14 | 0.009 | 28.2 | 1 | GTCTTTTTATAGTTCATAAGTGTGATGATTGGGTTTTATGCTCTTGTATGTGATGCC    |
| 43368_ | 664.2/1 |    |       |      |   | CTCTCCTCAAATCTTGTGATGATGTTGGCACATTACCCATCTGATG               |
| x1     | 564221  |    |       |      |   |                                                              |
|        | 95-     |    |       |      |   |                                                              |
|        | 156422  |    |       |      |   |                                                              |
|        | 299     |    |       |      |   |                                                              |
| ex3_59 | CM000   | 15 | 0.006 | 30.2 | 1 | ATTATTTTGTGTTTCATAAGTGTAAATGATTGGATTTTCATGCACATGTATGAGATGTGC |
| 43655_ | 679.2/3 |    |       |      |   | CTCCATCAAGCCTTGTTACTACAAAGTCAGTGCATTACCCATCTGATG             |
| x1     | 505449  |    |       |      |   |                                                              |
|        | 4-      |    |       |      |   |                                                              |
|        | 350543  |    |       |      |   |                                                              |
|        | 88      |    |       |      |   |                                                              |
| ex3_59 | CM000   | 14 | 0.009 | 28.2 | 1 | ATCCTTTTGTAGTCCATAAGCGTGATGATTGAGTGTTCACACTTATGTGAGACACGTG   |
| 44460_ | 668.2/3 |    |       |      |   | CCCTCCCTCAAACCTTGTTATGACATTGGCACATTATTTCTCTGATG              |
| x1     | 468279  |    |       |      |   |                                                              |
|        | 8-      |    |       |      |   |                                                              |
|        | 346829  |    |       |      |   |                                                              |
|        | 02      |    |       |      |   |                                                              |
| ex3_59 | ENST0   | 15 | 0.004 | 30.2 | 1 | AGGTCATTTCAAAGAGGTCTTGTGAGGCTGTGAAACCAAGAGCTCTTAACACTGCGA    |
| 46051_ | 000036  |    |       |      |   | CCA                                                          |
| x1     | 4831.1  |    |       |      |   |                                                              |
| ex3_59 | ENST0   | 15 | 0.002 | 30.2 | 1 | CTGCAGCCAATTAAGCTGACTGAATTCCTTTCCCTTATGGGGTCCAGTGTGCAATGG    |
| 47981_ | 000038  |    |       |      |   | CTG                                                          |
| x1     | 4210.1  |    |       |      |   |                                                              |
| ex3_59 | ENST0   | 15 | 0.002 | 30.2 | 1 | GGGTCGATGATGAGAACTTTATATTGTTCTGAAGAGAGGTGATGACTTAAAAATCATG   |
| 48208_ | 000036  |    |       |      |   | CT                                                           |
| x1     | 3810.1  |    |       |      |   |                                                              |
| ex3_59 | CM000   | 15 | 0.003 | 30.2 | 1 | ATCCTTTTGTAGTTCATAAGCATGATGATTATGTGTTACACACGTTCCCATGTAAGAT   |
| 49332_ | 684.2/2 |    |       |      |   | GTGCCACCTTCAAATATTTTTTTT                                     |
| x1     | 141105  |    |       |      |   |                                                              |
|        | 0-      |    |       |      |   |                                                              |
|        | 214111  |    |       |      |   |                                                              |

32

|                 |                                    |    |         |      |   |                                                                                                                                          |
|-----------------|------------------------------------|----|---------|------|---|------------------------------------------------------------------------------------------------------------------------------------------|
| ex3_59_50688_x1 | AC141 001.6/1 1830-11964           | 33 | 8E-14   | 65.9 | 1 | UUUCCCUGACCUGGGUAGAGUGGCAUCCAGUUGGUGGUGCCCAUCUCAUAUCAG CCAGGGACAAAGCAACCCCUUGUUCUCCAGCUUGGCUUUUCAUCUGUGCCUUAU GCCUGGUUCAUGCCUUGGACACAUUU |
| ex3_59_50976_x1 | ENST0 000045 9171.1                | 14 | 0.009   | 28.2 | 1 | ATTACTTGAAAATCACTCCCAGGCTTTGGCCATGGCAGCAGGTGAGATTCAAGGCC AGA                                                                             |
| ex3_59_51529_x1 | ENST0 000036 4446.1                | 16 | 0.000 8 | 32.2 | 1 | AATCTCCTGGGATTGTGTCTGGCGAGTGCCCAGTATTCTGCCACCTTCAGAAGGAAG GGA                                                                            |
| ex3_59_51985_x1 | CM000 677.2/2 505953 8-250596 33   | 14 | 0.008   | 28.2 | 1 | GGATCGATGATGAGTCCCCCAAAAAACATTCTTGAAAAGCTGAACAAAATGAG TGAAAACATACCGTCTGTTCTCAGCGGAACTGAGGTCC                                             |
| ex3_59_52429_x1 | CM000 672.2/2 316698 5-231671 01   | 23 | 0.005   | 30.2 | 1 | AGCATTAATCTACTGAAGATATCCACATCCTTAGACAGACGCAAAAAATAAATTCTC TTTTGCAACTCAGAGCTCATTGTGCGGTATGAGCTTTGATACATATAAGAAGGAATAT T                   |
| ex3_59_53858_x1 | AL132 709.5/1 41607-141533         | 18 | 0.008   | 28.2 | 1 | UAGAACAACGAUAACAAUAGUAGUGCAGGAGUCAUAAACUAUGAGUAAUAUGUGU GUGGAACUCUGAGCAUCA                                                               |
| ex3_59_54948_x1 | ENST0 000051 6021.1                | 15 | 0.003   | 30.2 | 1 | CTCGAGGGTGATGAAAAAGCATCCCTAGGTGTGGTTGTGGCATCTTGGTCACCTATG TGC                                                                            |
| ex3_59_54989_x1 | ENST0 000039 1156.1                | 15 | 0.003   | 30.2 | 1 | TGTCCTTGGCCTGGGTAGAGTGGCACCTAGTTGGTGGTGCCCATATTAGCCAGGGA CAAA                                                                            |
| ex3_59_55135_x1 | CM000 666.2/1 394364 94-139436 368 | 19 | 0.004   | 30.2 | 1 | ATTGGTTGAAAATCACCCCCGGCTTTGGCCATGGCAGCGGGTGAGATTGGCGCC CAGAGCCTCCAGGGGCTCAGCTCACCGCACGCTGACACATGTGCGGCGGTGAAA CCCAGCCCCAACAGGC           |
| ex3_59          | CM000                              | 15 | 0.006   | 30.2 | 1 | ATTCTTTTGTAGTTCAAAGCATGATGATTGGGTGTTACAGGCATGTGTAAGACGTG                                                                                 |

|                 |                                                    |    |       |      |   |                                                                                                                                               |
|-----------------|----------------------------------------------------|----|-------|------|---|-----------------------------------------------------------------------------------------------------------------------------------------------|
| 56868_x1        | 671.2/7<br>252723<br>6-<br>725273<br>39            |    |       |      |   | ACACCCTCTGAACCTCCTTATGACCCGGTACATTACCTGTCTGACC                                                                                                |
| ex3_59_57840_x1 | ENST0<br>000038<br>4381.1                          | 15 | 0.003 | 30.2 | 1 | TGTCAGTGATGAAAATTTTGTCTAGTTCTGCTACTGACATTAAGTTATGATAAAGTCTGT                                                                                  |
| ex3_59_61419_x1 | CM000<br>674.2/1<br>283984<br>08-<br>128398<br>522 | 18 | 0.009 | 28.2 | 1 | GTCCTTTTGTAGTTCATAAGGGTGAACCTTTGTAGTTCATAAGGTTTTTCATCCTCATGT<br>GTGAGACATGTCTCCCTCAGACCTTGTTATGATGTTGGCACGTTGCCCGTCTGATG                      |
| ex3_59_63148_x1 | ENST0<br>000045<br>9326.1                          | 30 | 4E-12 | 60   | 1 | GCCCAGGGTATGTTACGGGGCGATGCTGCCCTCCCAGCTGGCCCATGGGTGACC<br>CTGGG                                                                               |
| ex3_59_63222_x1 | KN538<br>374.1/2<br>557483<br>-                    | 20 | 0.001 | 32.2 | 1 | TAGTCAGGCGGGATAATCCTTACCTGTGCCTCCTTTTGGAGGGCAGTAGAATGTGGT<br>AGTTGGAGTTGCATGATACTTGATTCATATCTCTGTGTAATGATGGCATGCAATACCC<br>TGACTGCTCCTTTTGAAT |
| ex3_59_64296_x1 | AC022<br>107.8/6<br>6266-<br>66397                 | 15 | 0.006 | 30.2 | 1 | GCGCUGCCUUUGUACCCCACCGUGCCUCCGCCUGGUGUCUGGGGUCAGGUUGCA<br>GUGCCAGAGCACGUGCUUGCGCAUAAAUGGGGCAGCCUGGCCCCCUGCGGAUGG<br>UCCUUUUAACCGCGAGCAACAAGG  |
| ex3_59_67601_x1 | AADB0<br>201611<br>5.1/249<br>55-<br>25031         | 15 | 0.003 | 30.2 | 1 | UGGACCAAUGAUGAGACAGUGUUUAUGAACAAAAGAUGAUGAUUAAUCCAGUUCU<br>GCACAAAACACUGAGGUCCAUU                                                             |
| ex3_59_68756_x1 | CM000<br>664.2/1<br>217060<br>80-<br>121705<br>967 | 14 | 0.009 | 28.2 | 1 | ACCCACTTGTGGATTTGTTTCAAACCTTAGTTTGTAGATCTTTTGTAGTTTTTACATTCGTG<br>TGAGATGTGCCTCCCTCAAACCTTGTTACTACCTTGGCACATTACATATCTGATG                     |
| ex3_59_69245_x1 | CM000<br>677.2/2                                   | 24 | 1E-08 | 48.1 | 1 | GGATCGATGATGACTTTTAAATGGATCTCATCGGAATCTGAACAAAATGAGTGACCAA<br>ATCACTTCTGTGCCACTTCTGTGAGCTGAGGTCC                                              |

|        |         |    |       |      |   |                                                              |  |
|--------|---------|----|-------|------|---|--------------------------------------------------------------|--|
| x1     | 509766  |    |       |      |   |                                                              |  |
|        | 3-      |    |       |      |   |                                                              |  |
|        | 250977  |    |       |      |   |                                                              |  |
|        | 54      |    |       |      |   |                                                              |  |
| ex3_59 | ENST0   | 15 | 0.002 | 30.2 | 1 | ATCCTTTTGTAGTTCAGAATCATGATGATTGGGTTTTTCATGCTCATGTGTGAGATGTG  |  |
| 70310_ | 000045  |    |       |      |   | CC                                                           |  |
| x1     | 9372.1  |    |       |      |   |                                                              |  |
| ex3_59 | CM000   | 14 | 0.008 | 28.2 | 1 | AGCTTTTTGTAGTTCATAAGCGTGATGACTGGGTGTACACACATGTGTAAGATGTACC   |  |
| 70674_ | 677.2/1 |    |       |      |   | TCCCTCACACCTCGGTACAACATTGGCATATTACCCACCCACA                  |  |
| x1     | 016835  |    |       |      |   |                                                              |  |
|        | 15-     |    |       |      |   |                                                              |  |
|        | 101683  |    |       |      |   |                                                              |  |
|        | 616     |    |       |      |   |                                                              |  |
| ex3_59 | CM000   | 14 | 0.008 | 28.2 | 1 | GCCAAATGATGCTTATTTGACTCTGGTGCACTTCAGTGTAAGGATGATTTATAATCTG   |  |
| 71445_ | 674.2/6 |    |       |      |   | TCACTCATGATTGAAGGCC                                          |  |
| x1     | 457566  |    |       |      |   |                                                              |  |
|        | 5-      |    |       |      |   |                                                              |  |
|        | 645757  |    |       |      |   |                                                              |  |
|        | 41      |    |       |      |   |                                                              |  |
| ex3_59 | ENST0   | 20 | 2E-06 | 40.1 | 1 | ATCCTTTTGTAGTTCATGAGTGTGATGATTGTGTGTTTCATACGCTTGTGTGAGATGTG  |  |
| 71468_ | 000045  |    |       |      |   | CC                                                           |  |
| x1     | 9492.1  |    |       |      |   |                                                              |  |
| ex3_59 | CM000   | 20 | 0.000 | 32.2 | 1 | AGTTTTCTGTGGTTCATAAGCATGATGATTGGGTTTTTCATGCTTATGTGTGAGATGTG  |  |
| 72920_ | 685.2/1 |    | 6     |      |   | CCTCCCTCAAACCTTGTTACGACATTGGCACATTACCCATCTGATG               |  |
| x1     | 735793  |    |       |      |   |                                                              |  |
|        | 0-      |    |       |      |   |                                                              |  |
|        | 173580  |    |       |      |   |                                                              |  |
|        | 33      |    |       |      |   |                                                              |  |
| ex3_59 | ENST0   | 19 | 0.003 | 30.2 | 1 | ATTCATTTTCAAATATTTGCTGACTAAATGATACACACATGACTAAAACCTTAATCCTGA |  |
| 73545_ | 000060  |    |       |      |   | C                                                            |  |
| x1     | 7246.1  |    |       |      |   |                                                              |  |
| ex3_59 | KV766   | 15 | 0.007 | 30.2 | 1 | AAGACTATACTTCCGGATATCACTTCTATAGTTTGTACTAGAGAAGTTTTTCTGAACG   |  |
| 75058_ | 198.1/1 |    |       |      |   | TGTAGAGCACGGGAAAGCACAAAGGGAGAAATGTAGTTTTTTTTCTGAGCGTGAAAA    |  |
| x1     | 32915-  |    |       |      |   | TGGTTTTTTGTTGTTGCTTTCATTGCAAGTACGATTTGCCATTGACGATCGTTCTTACT  |  |
|        | 133131  |    |       |      |   | GTTCTCTTTGGAGGGTAAGAGGAAGAGAACGCGGTCTGAGTG                   |  |
| ex3_59 | CM000   | 14 | 0.009 | 28.2 | 1 | ATCCTTTTGTAGTTCATAAGCATGATGATCGGGTGTTTCATGTCCGAGCATGAGATGTG  |  |
| 75813_ | 670.2/1 |    |       |      |   | CCTCCCTCAAACCTTGTTGTGACGTTGGCACATTTCCCATCTGATG               |  |
| x1     | 226712  |    |       |      |   |                                                              |  |
|        | 91-     |    |       |      |   |                                                              |  |
|        | 122671  |    |       |      |   |                                                              |  |

|                 |                                                    |    |            |      |   |                                                                                                                                                                                                                                     |  |
|-----------------|----------------------------------------------------|----|------------|------|---|-------------------------------------------------------------------------------------------------------------------------------------------------------------------------------------------------------------------------------------|--|
|                 | 394                                                |    |            |      |   |                                                                                                                                                                                                                                     |  |
| ex3_59_76696_x1 | CM000<br>664.2/2<br>020818<br>75-<br>202081<br>978 | 19 | 3E-05      | 38.2 | 1 | ATCCTTTTGTAGTTCATAAGCATGATGATTGGGTGTTACATGCATGTGTGAATGTGC<br>CACCTCTGAACCTCGTTACAACATCAACACATTACCTGTCTGACC                                                                                                                          |  |
| ex3_59_77377_x1 | ENST0<br>000045<br>8953.1                          | 15 | 0.004      | 30.2 | 1 | AAGCATGGCACACTGGATGGGCGTTCTGCTTCTCTTTAAAGAGCATGGATTTATCCA<br>TAC                                                                                                                                                                    |  |
| ex3_59_78078_x1 | CM000<br>675.2/9<br>788580<br>9-<br>978859<br>12   | 15 | 0.005      | 30.2 | 1 | ATCCTCTTGTAGCTCCTAAGTGTGACGATTGGGTTTTTCAGGCTCATATGTGAGATGTG<br>CCTCCCTCAGATCTTGTTACGATGTTGGCACATTACCCATCTGATG                                                                                                                       |  |
| ex3_59_79976_x1 | CM000<br>672.2/1<br>138204<br>59-<br>113820<br>590 | 17 | 0.000<br>3 | 34.2 | 1 | ACTGCCCTGGAGGCATTGCAGATGTGGCTGCTGTGTGCACATTTGTGTCATTAGGTA<br>GCAGCGATTAGAGAGGCTATGTCTATGCTCAGCGTTCTGTCCCATGAACATTTGAAT<br>GTTTAATAGTCTGACTCT                                                                                        |  |
| ex3_59_82910_x1 | ENST0<br>000051<br>6190.1                          | 14 | 0.009      | 28.2 | 1 | TTGCGTCTATTTGACAGACTAGAATAATTAATCTATCTGCTGCTAAGGTTTCCCCTGCAG<br>AT                                                                                                                                                                  |  |
| ex3_59_83508_x1 | ENST0<br>000038<br>4250.1                          | 18 | 0.008      | 28.2 | 1 | TGCATTGCCATGGTATCTGCACTCAGTAGTTTATTCTGCTGGGTGTCCAAAGATCA<br>GTG                                                                                                                                                                     |  |
| ex3_59_83881_x1 | ENST0<br>000051<br>7031.1                          | 20 | 2E-06      | 40.1 | 1 | TATAGTGTGGCCATGGGATCTCCAAGTGCATGCAAGAGCAACCTGGAGAGACTTTGA<br>CAG                                                                                                                                                                    |  |
| ex3_59_83996_x1 | AJ6094<br>42.1/1-<br>121                           | 34 | 2E-14      | 67.9 | 1 | UGGUCAUUACCAAGGCUUUUAGAAUGCAGUUUCUCAUUUGCUGUGGACAUGACCA<br>UAAAAAAAAUUUCCAGUAGGUUUUCUAUCUGCUACUUUGCUAGCAAUCAGCUUUAU<br>UGGGAACAGUU                                                                                                  |  |
| ex3_59_86614_x1 | CM000<br>680.2/2<br>668952<br>9-<br>266893<br>16   | 14 | 0.008      | 28.2 | 1 | AAGACTGTACGTTCCAAGATTGTTTCTATAGTTGGTTGTGAGAGAAGTTTCTCTGAAC<br>TTGCAGAGCACGGGAAACCAGGAGGAGGAGGCTCAGGGTGCTCTCCACACGTGTG<br>AAACCGGCTGTGGGTGTTGCTTTCCTGTGACTGCCATTTGCCACTGATGATCTTCTC<br>TTCCTCTGGAAGAGTAAGAGGGGGGAAGGACACAGTTTCAGTGCT |  |

|                        |                                                    |    |       |      |   |                                                                                                                                                 |
|------------------------|----------------------------------------------------|----|-------|------|---|-------------------------------------------------------------------------------------------------------------------------------------------------|
| ex3_59<br>87036_<br>x1 | ENST0<br>000039<br>1287.1                          | 14 | 0.008 | 28.2 | 1 | ACTGCCCTGGAGGCATTGCAGATGTGGCTGCTGTGTCACATTTGTGTCATTAGGTA<br>GCA                                                                                 |
| ex3_59<br>87979_<br>x1 | BC021<br>677.1/1<br>965-<br>1834                   | 14 | 0.009 | 28.2 | 1 | GUGGAGGUCUAUUCOAUGGGGCUUUUCCUGUAGCUGCAUGUUGUUGGAAACUC<br>CUCAUAGACUACUCUGUGUUUUUGCUUUACUCACAGGACUAAUAGUUAGGUCUG<br>UGGGAAGGAACUACAAGACAGUU      |
| ex3_59<br>88219_<br>x1 | ENST0<br>000051<br>6313.1                          | 14 | 0.009 | 28.2 | 1 | AAGATTCGACAGATACCCTACTGCCTCTCTTTGTGGCGGCGGGGCTCAGGCTGCAG<br>CACC                                                                                |
| ex3_59<br>90453_<br>x1 | ENST0<br>000038<br>4171.1                          | 14 | 0.009 | 28.2 | 1 | GGCCTCCTGGTACTTACCCACAGGCTGCGTTCTTACACTGGCTGTACAGAAAGAGGA<br>GCT                                                                                |
| ex3_59<br>90464_<br>x1 | AC079<br>945.21/<br>34878-<br>35012                | 15 | 0.005 | 30.2 | 1 | CUCCAUGUGUCUUUGGAACCGUCAGCUGUGGCAGUUGCCCUUCCUAGCCAUGG<br>AAGAGUAAGUAUUAUCUUGUUUAUUGGCAAAGCUGUCACCAUUUCAUUGGUUAUCA<br>GAUUCUGACUUGCACAAGUAACAUUC |
| ex3_59<br>90544_<br>x1 | ENST0<br>000038<br>4448.1                          | 15 | 0.003 | 30.2 | 1 | GGCCTCCTGGTGCTTACAAGCAGCTGTGTGCTTGCATTGACTGTACAGAAAAAAGA<br>GAT                                                                                 |
| ex3_59<br>91398_<br>x1 | AL132<br>709.5/1<br>42597-<br>142509               | 14 | 0.008 | 28.2 | 1 | UGGACUGUUGAUGACAAGUGGUGGCUUAUGUGGUUGUACAUGCUGGUUGUAUUAU<br>GAAGAAUUAUACAUAUCUGAAACUUUGAGGUCCAA                                                  |
| ex3_59<br>91833_<br>x1 | ENST0<br>000040<br>8792.1                          | 14 | 0.008 | 28.2 | 1 | GCCGAGACTAAGTCGCATGCTGACACAGCTCTTGGTGTGCTACGGTACTTGGAGAG<br>AATC                                                                                |
| ex3_59<br>93607_<br>x1 | CM000<br>671.2/1<br>371236<br>08-<br>137123<br>509 | 19 | 0.003 | 30.2 | 1 | ATTTTTTGTAGTTCCTCAGTGTGATGATTTGGTTTCACACTCATGTGAGATGTGCTTTT<br>CTCAAACCTTCTTACAAAGTCAGCGCCTTACCCATCTGACC                                        |
| ex3_59<br>95256_<br>x1 | CM000<br>663.2/2<br>201371<br>64-<br>220137<br>266 | 14 | 0.008 | 28.2 | 1 | ATCCTTTTGTGATTCGTAAGCGTGATGATTGGGTTTTCGCACTATTGTGTGAGGTGTG<br>CCTCCCTCAAACCTTGTACAGTGTGGCACATTGCTGTCTGAAG                                       |
| ex3_59                 | ENST0                                              | 16 | 0.001 | 32.2 | 1 | AAACGATGAACTCACCTAAAATAGCTGTAATAACCAGCAGATTATGTAATGGCAAACC                                                                                      |

|        |         |    |       |      |   |                                                              |
|--------|---------|----|-------|------|---|--------------------------------------------------------------|
| 95771_ | 000039  |    |       |      |   | TA                                                           |
| x1     | 0927.1  |    |       |      |   |                                                              |
| ex3_59 | CM000   | 14 | 0.009 | 28.2 | 1 | CTGTGAATATTCTCGCTGTTCTGATTTTGTAAATAATCACGATGGGCTAAACATTTCGCA |
| 97722_ | 665.2/1 |    |       |      |   | ATATTAAGACCATGTATGTATCCCTAGACCTAGTTCTTTCCCCAGGTCTGGTTTTATAA  |
| x1     | 606969  |    |       |      |   | ATGCTGGTGATAAAC                                              |
|        | 29-     |    |       |      |   |                                                              |
|        | 160697  |    |       |      |   |                                                              |
|        | 060     |    |       |      |   |                                                              |
| ex3_59 | ENST0   | 15 | 0.005 | 30.2 | 1 | TTCAGATGATTTGAATTGATAAGCTGAGGTTCTGTGAGGAATGACAGTTAAGAGCATG   |
| 98109_ | 000039  |    |       |      |   | TT                                                           |
| x1     | 0993.1  |    |       |      |   |                                                              |
| ex3_59 | ENST0   | 16 | 0.001 | 32.2 | 1 | TCAATAATGAAATCTTCTGATTTGGTGAGAAATAATGCCTTAAAATTACACTCAATAGG  |
| 99126_ | 000039  |    |       |      |   | A                                                            |
| x1     | 0982.1  |    |       |      |   |                                                              |
| ex3_60 | ENST0   | 20 | 2E-06 | 40.1 | 1 | ACCCTTTTGTAGTTCATGAGCATGATGATTGGGTGTTACACACATGTGTGAAATGTG    |
| 01230_ | 000045  |    |       |      |   | CC                                                           |
| x1     | 8927.1  |    |       |      |   |                                                              |
| ex3_60 | CM000   | 19 | 0.005 | 30.2 | 1 | AGCCTTTGGTAGTTCATGAGCATGATGATTGGGTGTTACGCATGGGGGTGAGATGT     |
| 03497_ | 682.2/3 |    |       |      |   | GCCGCCTTCAAACCTTGTTACAATGTACAATGTGAACGCATTACCTGTCTGACA       |
| x1     | 612096  |    |       |      |   |                                                              |
|        | 2-      |    |       |      |   |                                                              |
|        | 361210  |    |       |      |   |                                                              |
|        | 72      |    |       |      |   |                                                              |
| ex3_60 | CM000   | 23 | 0.003 | 30.2 | 1 | AGGTTATTTCAAAGAGGGCTCATGAGGCTATGAAACCAAGA ACTCTTAATGCTATGAC  |
| 04083_ | 675.2/9 |    |       |      |   | CAAAGATTGAAGTTCTCTATAGAATGCCATAGCACTCAATAATGTTATGTTTTCTTGAG  |
| x1     | 978398  |    |       |      |   | GCATATAAGA                                                   |
|        | 3-      |    |       |      |   |                                                              |
|        | 997838  |    |       |      |   |                                                              |
|        | 57      |    |       |      |   |                                                              |
| ex3_60 | CM000   | 14 | 0.009 | 28.2 | 1 | ATCCTTTTTTAATTCCTAAGTGTGATGACTGGGTTTCCACACTCATGTGTGAGATGTG   |
| 04394_ | 664.2/8 |    |       |      |   | CTTTCCTCAAACCTTTTTTACAACATCAGCACACTACCTATCTGTTA              |
| x1     | 978895  |    |       |      |   |                                                              |
|        | -       |    |       |      |   |                                                              |
|        | 897899  |    |       |      |   |                                                              |
|        | 9       |    |       |      |   |                                                              |
| ex3_60 | CM000   | 16 | 0.000 | 32.2 | 1 | ATCCTTTTGTACTTCTTAAGCATAAGGATTAGGTGTTACACACAGGTGTGAGATGGG    |
| 04445_ | 665.2/5 |    | 5     |      |   | CCATCCTGAAACATTGCTACAATGTGCGCATATTACCTGTCTGACA               |
| x1     | 328329  |    |       |      |   |                                                              |
|        | 9-      |    |       |      |   |                                                              |
|        | 532831  |    |       |      |   |                                                              |

|                 |                               |    |        |      |   |                                                                                                                              |  |
|-----------------|-------------------------------|----|--------|------|---|------------------------------------------------------------------------------------------------------------------------------|--|
|                 | 96                            |    |        |      |   |                                                                                                                              |  |
| ex3_60_04465_x1 | ENST0000515906.1              | 15 | 0.003  | 30.2 | 1 | TTCACAATGTCTATTGAAGGATCTCATCACCTTTAGAGAGCTGTGGTCATGCCCTTAA                                                                   |  |
| ex3_60_05994_x1 | CM000663.2/20703800-207038694 | 15 | 0.002  | 30.2 | 1 | ATCCTTTTGTAGTTCATAAGTGTGATGATTGGGGTTTTGCACTTATGTGTGGGATGTGATGACTCTCTCAAACCTTGTTATGACATCAGCACATTACCTGTCTGATG                  |  |
| ex3_60_06906_x1 | ENST0000363626.1              | 15 | 0.003  | 30.2 | 1 | CTGTCAGGTGGGATAACCCTTCCCTGTTCCCTCCGTTTGGAGGGCAGATAGAACATGATGA                                                                |  |
| ex3_60_07357_x1 | CM000675.2/21527900-21527800  | 15 | 0.003  | 30.2 | 1 | ATTTATTCATCTTAAGTGTGATGACTGGGTTTTTCACATTGATGAGTGAGATGCGCCTCCCTCAAACCTTGTTTACAAGGACAACATATTGGTTGTCTGACG                       |  |
| ex3_60_08297_x1 | ENST0000583665.1              | 29 | 1E-06  | 42.1 | 1 | TACTCCAGCCTGGATGACAGAGCCAGACTCTGTCTCGAAAAAAAAAAAAAAAAAAGCTTAA                                                                |  |
| ex3_60_08565_x1 | AC092324.3/97410-97533        | 16 | 0.0007 | 32.2 | 1 | AACCCUUUUUCACUUUGCCAAUUGGACUUUAUGUCUUUAUUGAUCAUUCAAGUGAGCAAAGGAAAUACGCUUUUAAAACUCAGGCAAACGGUGUUUGUCUUGUAUCCCGUCAGAGGAAACAAAU |  |
| ex3_60_08835_x1 | CM000663.2/19532274-19532170  | 15 | 0.007  | 30.2 | 1 | ATCCTTTTGCAGTTCATGAGCATGATGATTGGGTGTTTATGTGTATGTGTGAGATCTGCCACTCTCTGAACCTTGTTACAACATTGTCACATTACCCGTCTAACC                    |  |
| ex3_60_11511_x1 | CM000666.2/14129778-141297774 | 16 | 0.001  | 32.2 | 1 | ATCCTTTTGTAGTTCATGAGCATAATGATTGGGTGTTTCGCATACATGTGTGAGATGTGCCACCCTCTGAACCTAGTTACAATGTGGGGATATTACCTGTCTGACC                   |  |
| ex3_60_13182_x1 | ENST000039                    | 14 | 0.009  | 28.2 | 1 | TAGACGATACTTTCAAGGATCATTCTATAGTTTGTACTAGAGAAATTGCTCTGAATGT                                                                   |  |

|                        |                                                    |    |       |      |   |                                                                                                                                                                                                                             |  |
|------------------------|----------------------------------------------------|----|-------|------|---|-----------------------------------------------------------------------------------------------------------------------------------------------------------------------------------------------------------------------------|--|
| x1                     | 1237.2                                             |    |       |      |   |                                                                                                                                                                                                                             |  |
| ex3_60<br>14131_<br>x1 | AC010<br>325.7/1<br>31787-<br>131697               | 20 | 2E-06 | 40.1 | 1 | GGGACCCCGUGAUGUCCAGCACUGGGCUCUGACUGCCCCUGAGGACACGGUGCA<br>CCCCGGGACCUUUGACAUCCGGGGUUCUGAGGGGCC                                                                                                                              |  |
| ex3_60<br>16036_<br>x1 | ENST0<br>000039<br>0893.2                          | 19 | 0.002 | 30.2 | 1 | AAGACTATATTTTGGAGGGATAATTTCTATAGTGTGTTTCTCGAGGAGTATATCTGAAC<br>GT                                                                                                                                                           |  |
| ex3_60<br>17790_<br>x1 | CM000<br>679.2/2<br>330370                         | 35 | 7E-15 | 69.9 | 1 | TAGAGAAGTCAATGATGGTTTTATTCATATCGTCTGAACCTGTCTGAAGCATCTCAGT<br>GATGCAATCTCTGTGTGGTTCTGAGACTTCTCCAAGT                                                                                                                         |  |
|                        | -<br>233027<br>6                                   |    |       |      |   |                                                                                                                                                                                                                             |  |
| ex3_60<br>18992_<br>x1 | CM000<br>685.2/1<br>352124<br>41-<br>135212<br>513 | 14 | 0.009 | 28.2 | 1 | AAGACTATACTTGCAGGGATCATTCTGTAGTTGGTTACTAGAGAAGTTTCTTGTCTG<br>TAGTTGGTTATTAGA                                                                                                                                                |  |
| ex3_60<br>19071_<br>x1 | ENST0<br>000036<br>3448.2                          | 15 | 0.003 | 30.2 | 1 | AAGACTATACTTTCAGGGATCATTGTATAGTTCGTTACTAGAGAATTTTCTCTGAATG<br>T                                                                                                                                                             |  |
| ex3_60<br>21684_<br>x1 | ENST0<br>000039<br>0971.1                          | 16 | 0.001 | 32.2 | 1 | TGCACTTATGTATGTTTTGTTTAACTGTGGACAAAGACTTATGGATAAGTACAAAAA<br>A                                                                                                                                                              |  |
| ex3_60<br>22513_<br>x1 | CM000<br>673.2/1<br>334370<br>39-<br>133436<br>938 | 18 | 5E-05 | 36.2 | 1 | GTGCTTCTGTGGTTCATAAGGGTGATGGCTGGGCTCATGCGGATGTGTGAGATGTG<br>CTACCCTGGAACTGGTTATGACGTCGGCACATTACCCATCTGACA                                                                                                                   |  |
| ex3_60<br>22683_<br>x1 | ENST0<br>000051<br>6213.1                          | 19 | 0.004 | 30.2 | 1 | CCACACAGGACGAAGGGTAGATATACTTGTACCAAATGAATGTTTCAGCAATCTGAGA<br>TAA                                                                                                                                                           |  |
| ex3_60<br>22906_<br>x1 | CM000<br>668.2/7<br>539906<br>7-<br>753988         | 14 | 0.009 | 28.2 | 1 | AATTCTATACTTTGAGGAGCCATTTTCATAGTTTGTACTAGAGAAGTTTCTCTGAACA<br>TGGAGTGTACCAGAAAGCATGAGGAGGAAGTGCAGTGCTCTCGCCTTAGCTGTGAA<br>ATCAGTTGCTTCATTGTAACCACCATTTTTTCATTGATGGCCCATCTTCTCTCCTTTGG<br>GAGAATAAGAAGGGGAAGATGCAGTCTGAGTGGT |  |

|                        |                                                        |    |            |      |   |                                                                                                                         |
|------------------------|--------------------------------------------------------|----|------------|------|---|-------------------------------------------------------------------------------------------------------------------------|
| ex3_60<br>24436_<br>x1 | 60<br>CM000<br>664.2/6<br>226499<br>5-<br>622650<br>98 | 14 | 0.008      | 28.2 | 1 | ATCCTTCTGTAGTTCATAAGCATCATGCCTGGGTTTTTCGCGTTCCCATGTGAGCTGTG<br>CCTCCCTCAAACCTTGTTATGGCATCGGCACATTATCCATCTGATG           |
| ex3_60<br>24612_<br>x1 | CM000<br>669.2/4<br>689480<br>-<br>468958<br>3         | 14 | 0.008      | 28.2 | 1 | ATCCTTTTGTGTTTCATGAGCATGACAATTGGGTGTTTTTCATGCAGCGAGTGAGATGT<br>GCCACCCTGGAACCTTGTTACGACGTTCGCATGTTACCTGTCTGACC          |
| ex3_60<br>27527_<br>x1 | ENST0<br>000051<br>6390.1                              | 15 | 0.005      | 30.2 | 1 | CTACAATCAATTAAGCCACATGGGACCTGGTGTGCAAGGGCTGCAAACAGCAGCATC<br>CTA                                                        |
| ex3_60<br>28018_<br>x1 | CM000<br>676.2/7<br>379901<br>5-<br>737991<br>18       | 15 | 0.002      | 30.2 | 1 | ATCCTTTTGTAGTTCATAAGCATGACGATTGGCTTTTCACTTTCATGTGTGAGATGTG<br>CCTCACTCAAACCTTGTTATATTGTCAGCACATTACCCATCTGATG            |
| ex3_60<br>30203_<br>x1 | CM000<br>667.2/2<br>907049<br>6-<br>290706<br>10       | 14 | 0.008      | 28.2 | 1 | GAGGAGGTCCATTTTAAAAAAGAATAGATTGGAAATGCCTCATAGAGTAACTCTGTG<br>GTTTTATTTTACCCACAGGACTATGGTTAAATATGTGGGAAAGAACTACAAGACAGTT |
| ex3_60<br>30509_<br>x1 | ENST0<br>000051<br>6202.1                              | 15 | 0.006      | 30.2 | 1 | AGGACGTCAAACCATCATAAAGTATAGATCTCCACAGGATGCCATAGTGAATAGTGC<br>TAT                                                        |
| ex3_60<br>31766_<br>x1 | ENST0<br>000036<br>2796.2                              | 17 | 0.000<br>1 | 34.2 | 1 | AAGACTATATTTTTCAGGGATCATTTCTACAGTGCACTACTAGAGAAGTTTCTGTGAAC<br>TT                                                       |
| ex3_60<br>32978_<br>x1 | ENST0<br>000036<br>4537.1                              | 15 | 0.002      | 30.2 | 1 | CTTGCACCTAAACCCAAAGAATCACTGTTTCTTGAAGTGGTGGTTTAAACAAGGTGCA<br>AA                                                        |
| ex3_60<br>33639_<br>x1 | CM000<br>674.2/7<br>716302                             | 15 | 0.004      | 30.2 | 1 | ATCCTTTTGTGGTTCATAAGCATGATGATTGGGTTTCCACATTCTTGTGAGATGGGCC<br>TCCCTCAAACCTTGTTATGATGTCAGCACATTACCCCTTGACG               |

|                        |                                                  |    |            |      |   |                                                                                                                                               |  |
|------------------------|--------------------------------------------------|----|------------|------|---|-----------------------------------------------------------------------------------------------------------------------------------------------|--|
|                        | 5-<br>771629<br>26                               |    |            |      |   |                                                                                                                                               |  |
| ex3_60<br>35158_<br>x1 | ENST0<br>000039<br>1256.1                        | 15 | 0.004      | 30.2 | 1 | GTGCCTAAGGTTAACACAGCGCCTTAAGAGGCTAACACAGAAGGGCAAAGTAAGTCT<br>CCA                                                                              |  |
| ex3_60<br>35463_<br>x1 | AC011<br>891.3/5<br>4747-<br>54616               | 15 | 0.004      | 30.2 | 1 | ACACUCUCAGCUAUGUAUAGUUACACCCUGGCUUCACUUGUGUGACUUUUGCAAUG<br>GGAAGAGAGAGAGAAGGUCCCCUUGGUACCUCAGCUCGGCCUUAUGGUGGCCUC<br>UUUCCUUGAAGGGUGCAACAAAA |  |
| ex3_60<br>37202_<br>x1 | AY270<br>787.1/1<br>35-13                        | 14 | 0.009      | 28.2 | 1 | ACUGGAGGACUAAGGAGGCUGGGUCUGAUGAGGCAAGAUUUUGCUGAUACAUUG<br>CUCCUAGAAAAAGGGUUGGCAAGAGCAGCCCUGGAGACUCACACGGCUGACUGU<br>UCUACCCAACACUC            |  |
| ex3_60<br>41392_<br>x1 | CM000<br>674.2/1<br>297205<br>3-<br>129721<br>43 | 14 | 0.008      | 28.2 | 1 | TACATTCCATGATGTCCAGCACTGGGCTCTGATCACTCCGGAGGACACAGTTTTCCC<br>CAAGACCATGGCTACCTGGGGATCTGAGAGAAAA                                               |  |
| ex3_60<br>41594_<br>x1 | ENST0<br>000051<br>6361.2                        | 14 | 0.009      | 28.2 | 1 | TGGACCAATGATGAGAGCATGTCACAAAACAAGGCTTATGATTAATCCAGTTCTGTAC<br>AC                                                                              |  |
| ex3_60<br>44034_<br>x1 | AC069<br>351.5/3<br>7957-<br>38002               | 14 | 0.008      | 28.2 | 1 | AGCUGAAGAGCUGAUGAUGUUUCCCCUAAAGCUGAAGCUCUUAAGCU                                                                                               |  |
| ex3_60<br>44618_<br>x1 | ENST0<br>000036<br>2963.1                        | 16 | 0.000<br>6 | 32.2 | 1 | GGGTCGATGATGAGAACCTTATATTTTCTGAAGAGAGGTGATGACTTAAAAATCATGC<br>TC                                                                              |  |
| ex3_60<br>46763_<br>x1 | ENST0<br>000038<br>6104.1                        | 15 | 0.005      | 30.2 | 1 | CAGCACTGCCAAGTGACCCATTGGGCTCCATCTTGACCAACTGGGCATCAAGCGGT<br>GCAA                                                                              |  |
| ex3_60<br>48989_<br>x1 | ENST0<br>000038<br>4520.1                        | 15 | 0.002      | 30.2 | 1 | CTGAGAATATCTTGCTGTTCTGATTTTGTAATAGGACAGGCTATAAAGATTGGCTATA<br>TT                                                                              |  |
| ex3_60<br>49726_<br>x1 | ENST0<br>000036<br>3072.1                        | 14 | 0.009      | 28.2 | 1 | TGGATCAATGATAAACTTGCTGGCATATGAATCTTGATAATGGATGATACGTGTGT<br>GG                                                                                |  |
| ex3_60<br>49981_<br>x1 | CM000<br>667.2/5                                 | 18 | 0.009      | 28.2 | 1 | ATCCTTTTGTAGTTCATAAACAGGATGATAGGGTTTTTACATTTATTGTGAGATGTGCT<br>TCCCTCCAACCTTGTTATGATGTTGATGCATTATCCATCTGATA                                   |  |

|        |         |    |       |      |   |                                                             |  |
|--------|---------|----|-------|------|---|-------------------------------------------------------------|--|
| x1     | 132198  |    |       |      |   |                                                             |  |
|        | 3-      |    |       |      |   |                                                             |  |
|        | 513220  |    |       |      |   |                                                             |  |
|        | 85      |    |       |      |   |                                                             |  |
| ex3_60 | CM000   | 15 | 0.004 | 30.2 | 1 | AGCCTCCCAAAGCACTGGGAGTGTGATGACTAGGTTTTCACACTGGGTTTTCATGTG   |  |
| 53925_ | 669.2/6 |    |       |      |   | TGAGATATGCCTTGCTCAAACCTTGTTACAGCACTGGCACATTGCCTGTCCGATG     |  |
| x1     | 643450  |    |       |      |   |                                                             |  |
|        | 7-      |    |       |      |   |                                                             |  |
|        | 664346  |    |       |      |   |                                                             |  |
|        | 18      |    |       |      |   |                                                             |  |
| ex3_60 | CM000   | 14 | 0.008 | 28.2 | 1 | TTCCCTGTGACACATCAGCAGGATGACTGGGCTTTCATCCTCCTGGGTGGGACATGC   |  |
| 57238_ | 683.2/4 |    |       |      |   | CTCCCTCAAGCCTTGCTGCTGGGCACATTATCTGTCCAACA                   |  |
| x1     | 160468  |    |       |      |   |                                                             |  |
|        | 3-      |    |       |      |   |                                                             |  |
|        | 416045  |    |       |      |   |                                                             |  |
|        | 86      |    |       |      |   |                                                             |  |
| ex3_60 | ENST0   | 15 | 0.002 | 30.2 | 1 | AGCACTTGTGTTTGCTTTTGTGGACTTGTGGACAAAGACTTATAGTAGACAGGCACG   |  |
| 57496_ | 000051  |    |       |      |   | AA                                                          |  |
| x1     | 7256.1  |    |       |      |   |                                                             |  |
| ex3_60 | CM000   | 14 | 0.008 | 28.2 | 1 | AAGACTATACTTTCAGGGATCATTCTATAGTTTATTACTGGAGAAGTTTCTTTGAATG  |  |
| 59775_ | 685.2/6 |    |       |      |   | TATAGAGCACTAAAAACCATATTATCTCCCAAGTGAAAGCTGCCTCTTGGTGTGGT    |  |
| x1     | 969295  |    |       |      |   | TTACTTCAGTTGCCATTTGCCATTAATGATTGTTCTTCTTTTCTTTGGGGAGAATAAGA |  |
|        | 6-      |    |       |      |   | GACAGAGGACACAGTCTGGGTGGG                                    |  |
|        | 696931  |    |       |      |   |                                                             |  |
|        | 55      |    |       |      |   |                                                             |  |
| ex3_60 | CM000   | 14 | 0.009 | 28.2 | 1 | GGGGTGTGCTCAGAGCAGGGGGCCTGAAGAATGCTTCTTCTGTTTACAACACACCC    |  |
| 60545_ | 685.2/4 |    |       |      |   | AATAGGAATCTGGGGTCATTGTGACGGGGGGCACAAAACCTTGTGACCTCTCTATGAA  |  |
| x1     | 738864  |    |       |      |   | CAAATGCCCCACATGT                                            |  |
|        | 9-      |    |       |      |   |                                                             |  |
|        | 473887  |    |       |      |   |                                                             |  |
|        | 77      |    |       |      |   |                                                             |  |
| ex3_60 | AC092   | 15 | 0.005 | 30.2 | 1 | UUGUCCUGGCCUAGGCCAUUUCUGCUCCCCCGCGCUCAGUCCUAGCAGAGUAGU      |  |
| 60784_ | 184.7/5 |    |       |      |   | CUGGCAGGACGCACAGCAAUCUCCUCUCAGUUUAGGAGGGCCGUCUCCUAAGAA      |  |
| x1     | 0327-   |    |       |      |   | UAGGGCUGGCAGGAAAGGACAAU                                     |  |
|        | 50196   |    |       |      |   |                                                             |  |
| ex3_60 | ENST0   | 16 | 0.000 | 32.2 | 1 | GATCAATGATGAAACTAGCCAAATCTGAGCATCAGAAGTCTTCCAGTCTACCTGATG   |  |
| 62185_ | 000036  |    | 5     |      |   | CA                                                          |  |
| x1     | 4329.1  |    |       |      |   |                                                             |  |
| ex3_60 | ENST0   | 17 | 0.000 | 34.2 | 1 | AAGATTATATTTCCAGGGGTCATTTCTGTGGTTCATTAAGGAGTTTCCCAAG        |  |
| 62229_ | 000039  |    | 3     |      |   | TG                                                          |  |

|                        |                                                    |    |       |      |   |                                                                                                                                                     |  |
|------------------------|----------------------------------------------------|----|-------|------|---|-----------------------------------------------------------------------------------------------------------------------------------------------------|--|
| x1                     | 0909.2                                             |    |       |      |   |                                                                                                                                                     |  |
| ex3_60<br>62545_<br>x1 | CM000<br>669.2/1<br>327530<br>23-<br>132753<br>126 | 15 | 0.003 | 30.2 | 1 | TGCTGGAGTGATGAAAAAGTATCTTCAGGTGTGGCTGTGGCCACCTTGGCCACCTGT<br>GTGTCACTTGCCAATGCAAGGACTTGTATAGTTACACTGACTGTTA                                         |  |
| ex3_60<br>64328_<br>x1 | CM000<br>668.2/2<br>416627<br>3-<br>241663<br>74   | 14 | 0.008 | 28.2 | 1 | CTCGAGGGTGATGAAAAAGCATCCCTAGGTGTGGTTGTGGCATCTTGGTCACCTATG<br>TGCCACCTGCCAGTGCAAGGATTTGTATAGTTATAGTGACCGTG                                           |  |
| ex3_60<br>66079_<br>x1 | CM000<br>685.2/1<br>331527<br>54-<br>133152<br>892 | 15 | 0.004 | 30.2 | 1 | TGCACTGCGTGGTATCTGCACTCAGCAGTTTACTCCTGCTAGGGTGTTCAAAGGTCA<br>GTGCCATAGAAATCCAGTATCTGGTTTCATTGGTTTTCTTGGCTTTGTGCTTGTTAAA<br>CCTGGTATTTCTATTGATACAGCA |  |
| ex3_60<br>66291_<br>x1 | CM000<br>679.2/1<br>966200<br>0-<br>196620<br>90   | 14 | 0.009 | 28.2 | 1 | CTGATTCTTTGTACTAGGATGCAAAAGAAAACAATCCTTGTGCCTTCTATCTCTCTTG<br>GTGGCAGCCCAGATTGAATTGGGAATACATCT                                                      |  |
| ex3_60<br>67389_<br>x1 | ENST0<br>000036<br>2451.1                          | 19 | 0.002 | 30.2 | 1 | AGGTTGTGATGAATTGCTTTAATTTCTGACACCTCATATGAAAGCTGCACTTGCAGTC<br>TT                                                                                    |  |
| ex3_60<br>68998_<br>x1 | ENST0<br>000039<br>1265.1                          | 15 | 0.003 | 30.2 | 1 | CCTCCTTTTCTTGTCAGGGACTGAGTGTGTGGTCCTGCTCCTGTTATGTATGGAGGC<br>AAA                                                                                    |  |
| ex3_60<br>71810_<br>x1 | CM000<br>669.2/9<br>888509<br>0-<br>988849<br>90   | 14 | 0.009 | 28.2 | 1 | ATCCTTTTGTAGTTTGTAAGGGTGATGATTGGGGTTTCATGCTTATATGTGAGACATG<br>CCTCCCTCAAACCTTGTTATGTCAGCACATTACCCATCTGATG                                           |  |
| ex3_60<br>77303_<br>x1 | CM000<br>685.2/1<br>205443                         | 14 | 0.008 | 28.2 | 1 | ATCCTTTTGTAGTTGAGAAGCATGATGATTGGGGTTTTTATGCTCATATATGAGATGTG<br>CTTCCTTCAAACCTTGTTATGACATCAGCACATTACCTGTCTGATG                                       |  |

|                        |                                                    |    |       |      |   |                                                                                                                                                     |  |
|------------------------|----------------------------------------------------|----|-------|------|---|-----------------------------------------------------------------------------------------------------------------------------------------------------|--|
|                        | 15-<br>120544<br>418                               |    |       |      |   |                                                                                                                                                     |  |
| ex3_60<br>79394_<br>x1 | ENST0<br>000051<br>6468.1                          | 18 | 0.009 | 28.2 | 1 | GGATTGACGATGACTTTAAAAAATAATCTCATTGAAATCTGAAAAAATGAGTGA<br>CC                                                                                        |  |
| ex3_60<br>84257_<br>x1 | AC026<br>161.4/8<br>9260-<br>89123                 | 14 | 0.008 | 28.2 | 1 | GCUGUCCUGGACCUGCCAGCUGCACAGAUGCAGAUGCUCUGCUAUGCCUGUAAC<br>AUCGGGGCGAAGUGAAAGUGGCUAUUUUCUACACUCAGUUUUCAGAAAACAGUGAA<br>CAACAAGAAUGGAUAAUAGCCUGACAUUU |  |
| ex3_60<br>84583_<br>x1 | ENST0<br>000051<br>6910.1                          | 14 | 0.009 | 28.2 | 1 | GGAAAGGTTACTAAAAGAACACTGCATTCTGTAGCCTGCACGTCCTTAGAAACACC<br>TCA                                                                                     |  |
| ex3_60<br>85393_<br>x1 | CM000<br>668.2/3<br>469278<br>0-<br>346928<br>83   | 15 | 0.004 | 30.2 | 1 | ATCCTTTTGTAAATTCAGATGCGTGATGATTGGGTGTTTACATGCATGTATGAGACGTG<br>CCAACCTTGAATCTTGTATATAACGTGCACATTACCCGTCTGACA                                        |  |
| ex3_60<br>85660_<br>x1 | AC026<br>222.5/2<br>6043-<br>25912                 | 15 | 0.003 | 30.2 | 1 | GGCCUCUCAGUCCGCUJAAUCACACAGGUCCAGUGUGUGCUUGGUGUCUUUUC<br>UGGGAGGCAGAGGAAGGCUCUCCUAAUCACAACAGACCUGCCCAGAAGGGCCUCU<br>CUAUUUUCUAGGAGUAUGAUAGCU        |  |
| ex3_60<br>86113_<br>x1 | CM000<br>670.2/1<br>298687<br>16-<br>129868<br>590 | 16 | 0.001 | 32.2 | 1 | AGGATATATCAAAGAGACTTTCTGGGGCTGGGAAACCAGGATCTCGTAATGCTATGA<br>CCAAAGATTGAAGTTTTGCATAGGATACCGTAGTCACTCAGTAGTGCTGTTTTCTGA<br>GGAAATACAAGA              |  |
| ex3_60<br>86610_<br>x1 | CM000<br>668.2/4<br>250560<br>6-<br>425055<br>00   | 15 | 0.003 | 30.2 | 1 | ATCCGTTTGTGATTCATAAGGGTGATGATTGGGTTTTCATGCTAATATGTGAGATGTG<br>ACTCCTTCAAACCTTCTTGTATGACATCAGCACATTACTCATCTGATG                                      |  |
| ex3_60<br>86874_<br>x1 | ENST0<br>000036<br>5579.1                          | 14 | 0.009 | 28.2 | 1 | AGGCAGGTACTGTTAGAATATAACTGAAGTGTTTTATTGTTATTGTCATTGCTTAAAGC<br>A                                                                                    |  |
| ex3_60<br>87337_<br>x1 | CM000<br>663.2/3                                   | 19 | 0.002 | 30.2 | 1 | ATCCTTTTGTAGTTTGCAAGTGTGATGATTGGGGATTCACTCGTATGTGAGATGTG<br>TCACCCCGAACCTTTTACGTTGGCAAATACCCATCTGACA                                                |  |

|                        |                                                    |    |            |      |   |                                                                                                                                        |  |
|------------------------|----------------------------------------------------|----|------------|------|---|----------------------------------------------------------------------------------------------------------------------------------------|--|
| x1                     | 775020<br>2-<br>377503<br>02                       |    |            |      |   |                                                                                                                                        |  |
| ex3_60<br>88084_<br>x1 | CM000<br>674.2/5<br>048856<br>6-<br>504884<br>84   | 18 | 3E-05      | 36.2 | 1 | AAGACTATACTTTTCAGGGATCATTTCATAGTTTGTTACTAGAGAAGTTTCTCTGAGC<br>ATGTGGAGCACTGAAATATCTAAGA                                                |  |
| ex3_60<br>88561_<br>x1 | CM000<br>684.2/2<br>251778<br>0-<br>225178<br>75   | 16 | 0.000<br>8 | 32.2 | 1 | ATCCTTTTGTGAGGATAAGCGTGATGCTTGGGTTTTCACTCATGTGAGATGTGCTTCC<br>CTCAAACCTTGTTATATCAGCATGTTAACATCTGATG                                    |  |
| ex3_60<br>89355_<br>x1 | ENST0<br>000045<br>9332.1                          | 14 | 0.008      | 28.2 | 1 | GCTTAATGATGAGAATCATTATTTCTTGAATTGGATGACACTTTCCATTCTGCAAAG<br>GG                                                                        |  |
| ex3_60<br>90811_<br>x1 | ENST0<br>000038<br>4249.1                          | 15 | 0.004      | 30.2 | 1 | GGCCTCCTGGGATCCCATCTGGAAAGTGCTTAGTATTCTGCCTGCTTCACAAAGGGA<br>GGG                                                                       |  |
| ex3_60<br>96143_<br>x1 | CM000<br>685.2/1<br>241977<br>43-<br>124197<br>849 | 15 | 0.003      | 30.2 | 1 | TGTAACCTTGTGGACAAGGCTTATTGACAGGTGCAAAAATAAATAATCTTTTGCCACT<br>CAGAACTCATTGTTTCAGTATGAGTTTTGATACACATAAGAAGGAATATT                       |  |
| ex3_60<br>96539_<br>x1 | CM000<br>665.2/7<br>257296<br>5-<br>725730<br>68   | 15 | 0.005      | 30.2 | 1 | ATCCTTTTGTAGTTCTTGAGTGTGATGATCGGGTGCTCACACTCATGTGTGAGATATG<br>CCACCCTCGAACCTCATTTTGAAGTCAGCACGTTACCTGTCTGACA                           |  |
| ex3_60<br>97634_<br>x1 | ENST0<br>000041<br>0213.1                          | 15 | 0.005      | 30.2 | 1 | TCAGCTTGAGTCACTCTTCCCAGGCTTTATCCAGGTGGCTTAGGTTAGCTAGGGCTG<br>TGT                                                                       |  |
| ex3_61<br>04312_<br>x1 | AC094<br>019.2/4<br>7367-                          | 20 | 2E-06      | 40.1 | 1 | AGGUCAUUUCAAGAGGUCUUGUGAGGCUGUGAAACCAAGAGCUCUUAACACUGC<br>GACCAAAGAUGGAAGUUCUCUAUAGGAUGCCAUGGCAUUUGAUGGUGCUAUGUUU<br>UCUUGAGGAGAUUAAGA |  |

|                 |                                |    |        |      |   |                                                                                                                                            |  |
|-----------------|--------------------------------|----|--------|------|---|--------------------------------------------------------------------------------------------------------------------------------------------|--|
|                 | 47494                          |    |        |      |   |                                                                                                                                            |  |
| ex3_61_06739_x1 | ENST0000516618.1               | 15 | 0.005  | 30.2 | 1 | TATAAATGTGATGAATTGCACACTCGCAGAGTCATAGCATTAGGGGATGCAGGCAGTGTT                                                                               |  |
| ex3_61_07625_x1 | CM000668.2/103583135-103583268 | 16 | 0.0007 | 32.2 | 1 | AAGCTAGCCAATGAATCTGCTTACCTAAACATGTTTCTGCAGAAATTTTTATTTTAAAAAGCTGGTAATAGTAAAGCCATTTATGAGCCTTAAGTATATTGAAGTTGTTAAGATCCC<br>TGAAAATGGCTATAACA |  |
| ex3_61_08129_x1 | CM000665.2/11187915-111879311  | 14 | 0.009  | 28.2 | 1 | AAGACTATACTTTTCAGGGATCATTCTATACTTCATTACTAGAGAAGTTTCTCTGAATGTGTAGAGTACCAACTTCTACGCAAATAAACTAGAAAATCTAGAAGA                                  |  |
| ex3_61_09950_x1 | CM000683.2/36258426            | 15 | 0.004  | 30.2 | 1 | ATTCATCTGCAGTTCATTAGTGTGATGATTGGGTGTTACGCACATGCGTGATATGTGCCACCCTCAAACTTTGTTACAATGGTCGGCACATTGTCTGATGTGAAA                                  |  |
| ex3_61_13292_x1 | CM000664.2/10057769-100577557  | 15 | 0.003  | 30.2 | 1 | CTCATTTTGTGGTTCATAAGTACGATCACGTATGTGAGATGTGCCCCCTCAAATATCGTTAGGCTGTTGGCACATTACCCATATGACA                                                   |  |
| ex3_61_14708_x1 | CM000671.2/38147561            | 15 | 0.005  | 30.2 | 1 | TCGATGGGTGGGATAATCCTTACCTGTTCTCGTTTTGGAGGGCAGATAGAACATGATGATTGGAGATGCATGAAATGTGATTAATGCCTCTGCCTAATCAGGACTTGCAACACCCTGAGTACTCCTCTCTGAT      |  |
| ex3_61_14805_x1 | CM000677.2/25099594            | 33 | 8E-14  | 65.9 | 1 | GGATCGATGATGACTATAAAAAAATGGATCTCATCGGAATCTGAACAAAATGAGTGA<br>CCAAATCATTCTGTGCCACTTCTGTGAGCTGAGGTCC                                         |  |

|                        |                                                    |    |       |      |   |                                                                                                                                        |
|------------------------|----------------------------------------------------|----|-------|------|---|----------------------------------------------------------------------------------------------------------------------------------------|
| ex3_61<br>15069_<br>x1 | CM000<br>672.2/1<br>043997<br>90-<br>104399<br>903 | 14 | 0.009 | 28.2 | 1 | ATATAATTGCAATTAATAATTACATGATTTGATCTTGACTGGGTGTTACATGTATGTG<br>TAAGATATGCCTCCCTCAAACCTTATCACGATGTGCGCACATTACCCATCCAACA                  |
| ex3_61<br>15982_<br>x1 | CM000<br>663.2/1<br>717680<br>70-<br>171768<br>175 | 15 | 0.003 | 30.2 | 1 | CACCCCTTTTCTCCTCAGCCAAGGCTAGAGGCCAAGATCAGCCCTCAGGGATCATCA<br>TCAGGACTGCCATGAGCTGAGCTGCCTTGTTCCTGCCGCAAACATGT                           |
| ex3_61<br>17829_<br>x1 | CM000<br>665.2/8<br>062807<br>3-<br>806279<br>61   | 15 | 0.002 | 30.2 | 1 | GAGGAGGAGATATTTGTGTTCTCTCATGAGCGTGAAAACAGCGTTTGGTGTTCGTT<br>ATTCCAAGTCCATTTGCTATTGGTGATCGTTCTTCTCTAGAGAATGCGCAACCTA                    |
| ex3_61<br>20865_<br>x1 | ENST0<br>000036<br>2981.2                          | 14 | 0.009 | 28.2 | 1 | AAGACTATACTTTCAGGGATCATTTCTACATTTCCGGTAATTTCTTTGAACATGTGG<br>AG                                                                        |
| ex3_61<br>21251_<br>x1 | ENST0<br>000039<br>1069.1                          | 15 | 0.004 | 30.2 | 1 | GGTCATATAAGTAGAAACCACTGAGTGAATCTTACTAGAAAAGTGAATGGCCATTCTT<br>GG                                                                       |
| ex3_61<br>22281_<br>x1 | ENST0<br>000058<br>1669.1                          | 14 | 0.008 | 28.2 | 1 | TGCTGGTGGTGAAGCTCCCTCTCTCCGAGCACTGGGCCCTGCCTGGGGTAAGGCT                                                                                |
| ex3_61<br>22703_<br>x1 | CM000<br>670.2/8<br>491991<br>3-<br>849198<br>18   | 14 | 0.009 | 28.2 | 1 | AGACTCAGTGAATGTGATGATTGAATTTTCACACTCATGTGTGAGATGTGCCTCCCTC<br>AAATCTTGTTATGATATTGGCACATTACCTGTCTAACA                                   |
| ex3_61<br>23259_<br>x1 | ENST0<br>000051<br>6319.1                          | 14 | 0.008 | 28.2 | 1 | ACTCCATGATGAACCCAAAATGCCAAGTATATGACTGAACTTACAAGTGATACCATCT<br>TA                                                                       |
| ex3_61<br>29116_<br>x1 | AC092<br>590.2/3<br>5181-<br>35054                 | 14 | 0.009 | 28.2 | 1 | AGGCCAUUUUAAAGAGGGCUCAUGGGACUAUGAAACCAAGAGCUCUUAUGCUGU<br>GACCAAAGAUUGAAGUUCUCUAUAGGUUGCCAAAGCACUCAGUGGUGCUGUGUUU<br>UCCUGAGGAGAUUAAGA |

|                        |                                                    |    |       |      |   |                                                                                                                                          |
|------------------------|----------------------------------------------------|----|-------|------|---|------------------------------------------------------------------------------------------------------------------------------------------|
| ex3_61<br>29816_<br>x1 | CM000<br>674.2/1<br>013588<br>49-<br>101358<br>748 | 14 | 0.009 | 28.2 | 1 | ATGCTTCATAATTTATAAGTGTGATGGTTGGGTTTCTATGTTTATGGGTGAGATATGT<br>CTCCCTCAACCTTGTTACAACAGTTGGGCATTATCTGCCTGATG                               |
| ex3_61<br>32896_<br>x1 | CM000<br>670.2/1<br>018473<br>60-<br>101847<br>256 | 16 | 0.001 | 32.2 | 1 | ATCCTGTTGTAGCTCATGAGCGTGATAATTGGGTGTTTCATGTGCGTGTGTGAGATGT<br>GCCACCCTCTGAACCTTGTTACGACATTGGCACATTACCTGTCTGACC                           |
| ex3_61<br>35498_<br>x1 | ENST0<br>000051<br>6084.2                          | 14 | 0.008 | 28.2 | 1 | TCCATTTTCAGAAAGCCGAGGTCAAATAATGAGTCCTGGGGAATTCAAACCTTGTGTTA<br>AG                                                                        |
| ex3_61<br>36471_<br>x1 | ENST0<br>000045<br>9536.1                          | 18 | 0.008 | 28.2 | 1 | TTCTCATGTGGGATAGTTTTCACTTGTTCCCTTCTTTGGAGGGCAGATTAGAACATGA<br>TG                                                                         |
| ex3_61<br>36508_<br>x1 | CM000<br>674.2/1<br>147377<br>04-<br>114737<br>798 | 14 | 0.009 | 28.2 | 1 | CACTCCCCTTTTCATTTTACCATTGAGGCTTATGTCTTTATTGGTTGTTCAAGTAGGGC<br>AAAGGAAATGGCCTTTTAAACTCAGAGGCCAGGTAC                                      |
| ex3_61<br>37313_<br>x1 | ENST0<br>000039<br>1316.1                          | 15 | 0.002 | 30.2 | 1 | TTCTTACAAATCTAAATGTGCTTTGATGCAAGTATATTTGAATCCCTTTCCATCTGATA<br>A                                                                         |
| ex3_61<br>37856_<br>x1 | ENST0<br>000039<br>1130.1                          | 15 | 0.006 | 30.2 | 1 | GCCATGATGCTCTTCGGTTTAGGAGCAATTAATGACTACAGATTGGTGGCAGTTTA<br>TG                                                                           |
| ex3_61<br>38718_<br>x1 | ENST0<br>000051<br>6639.1                          | 15 | 0.004 | 30.2 | 1 | AAGCAGAACTCAGACTACAATATAGCCGTCAACTGCTGTTTTGTCATATTCTCTGCTC<br>AA                                                                         |
| ex3_61<br>39213_<br>x1 | CM000<br>677.2/4<br>521503<br>3-<br>452149<br>06   | 14 | 0.009 | 28.2 | 1 | GGGATGTGCTCAGAGCAGGGGGCCTGAGGAATGGCTCCTCTGTTTACAACACACCC<br>AACAGGAATCTGGGATCATTGTGACGAGAGGTACCAAACCTTGTAGGCTTCCTACGA<br>ACAAACTGTACATGT |
| ex3_61                 | AL132                                              | 34 | 2E-14 | 67.9 | 1 | UGGACCAGUGAUGACCACUGGUGGCAUAUGAGUCAUACACAUGAACACCAUGUUU                                                                                  |

|                 |                                            |    |       |      |   |                                                                                                                                               |
|-----------------|--------------------------------------------|----|-------|------|---|-----------------------------------------------------------------------------------------------------------------------------------------------|
| 40472_x1        | 709.5/1<br>51720-151647                    |    |       |      |   | CUAGAACUCUGAGGUCCAA                                                                                                                           |
| ex3_61_46245_x1 | CM000<br>684.2/3<br>370492<br>0-33704786   | 22 | 1E-07 | 44.1 | 1 | GCACTGCTTTAGAGCCTCTGCGTGTCTGGCTGTGGCCTCAGGGGTCTAGCAGCAGT<br>GCTAGAGCAGACCCAGCTTGTGATCCGGGGCTGCTTAGAGGCCACCTAAGTGAT<br>TCCTTTGGCAGCAAGCAACATTC |
| ex3_61_49277_x1 | CM000<br>675.2/9<br>978415<br>7-99784054   | 15 | 0.005 | 30.2 | 1 | ATCCTTTTGTGGTTCACAAGCATGATGATTGACTTCTCATGCTATTGTGTGAGATGTA<br>CCTCCTTCAAATCTTGCTGCAACGTTGGCACATTACAGATCTGATG                                  |
| ex3_61_52853_x1 | CM000<br>684.2/4<br>207616<br>1-42076058   | 14 | 0.009 | 28.2 | 1 | ATCCTTTTGTAGTTCATGAGCGTGATGATTGGGTGTTACATGCATGTGTGAGCTGT<br>GCCACCCTCGAACCTTGTTACCATGTAGGCACATTACCGATCTGACA                                   |
| ex3_61_52957_x1 | CM000<br>663.2/2<br>363009<br>80-236301051 | 16 | 0.001 | 32.2 | 1 | ATCCTTTTGTAGCTCATAAGCATGATGATTGAGGTTTCACACACATTAATGAAATGTG<br>CCTCCCTCAGACTG                                                                  |
| ex3_61_53058_x1 | ENST0<br>000036<br>4671.1                  | 14 | 0.008 | 28.2 | 1 | AGCCTCTTTCTAGATGAGAATGGGCACTGTCGATCATGGTGTCTGAAAATTGTAAGT<br>GGC                                                                              |
| ex3_61_55092_x1 | ENST0<br>000039<br>0859.1                  | 14 | 0.008 | 28.2 | 1 | GGATTTATAATGAGCTGTGTTTACTGAGCATTATGAAGTAAAGTTCAATATGATTACTC<br>T                                                                              |
| ex3_61_55270_x1 | ENST0<br>000036<br>4939.1                  | 18 | 9E-05 | 36.2 | 1 | TCATCAGGTGGGATAATCTTTTCCTGTTCTTCTTTTGGAGGACAGATTATAACATGA<br>TT                                                                               |
| ex3_61_57588_x1 | ENST0<br>000039<br>1263.1                  | 15 | 0.002 | 30.2 | 1 | GTCGCACTTAACTTAAGACTCTTTTTCTTGCAGCAGTGGTTTAAACAGAGGAACAAA<br>CA                                                                               |
| ex3_61          | CM000                                      | 14 | 0.008 | 28.2 | 1 | TATGGCCTTTATCAAAGCTGCAGCTGCTTCCATGTAGCTGCTGTGGTCAAAAAGAAG                                                                                     |

|                    |                                                    |    |            |      |   |                                                                                                                                                                                                                    |
|--------------------|----------------------------------------------------|----|------------|------|---|--------------------------------------------------------------------------------------------------------------------------------------------------------------------------------------------------------------------|
| 58143_x1           | 663.2/2<br>123528<br>16-<br>212352<br>950          |    |            |      |   | CCAAGAGTGACAGTTTTTCCTTGATGGTCATAGTTCTGTTTGCTGTAAGTCTGCAA<br>GATTTTGGGAAAATACCATT                                                                                                                                   |
| ex3_61<br>62227_x1 | CM000<br>666.2/1<br>589094<br>42-<br>158909<br>373 | 15 | 0.002      | 30.2 | 1 | TGGCATGATTTTAAAGCTGTTTCACCCGAGTACACAGCAGGGAAGCCATCCTTGGAG<br>AGCTGAACATGCA                                                                                                                                         |
| ex3_61<br>62920_x1 | AC016<br>394.13/<br>8497-<br>8370                  | 16 | 0.000<br>5 | 32.2 | 1 | GGGGUGUGCUCAGAGCAGGGGGCCUAAAGAAUGGCUCCUCUGUUUAUACACAC<br>CCAACAGGAAUCUGGGGUCAAUGUGAUGAGAGGCACAAAGCUUGUGGCCUCCCUA<br>CAAACAAUAGCCUACAUGU                                                                            |
| ex3_61<br>63229_x1 | ENST0<br>000038<br>4516.1                          | 25 | 3E-09      | 50.1 | 1 | GGATCGATGATGACTTAAAAAATGGAAACCTTGAAATCTGAACAAAATGAGTGAC<br>CAA                                                                                                                                                     |
| ex3_61<br>63619_x1 | ENST0<br>000036<br>3536.1                          | 15 | 0.002      | 30.2 | 1 | TGGATCGATGATGACTACTGGTGGCGTATGAGTCATAGACAATGAATACGTGTCTGG<br>AAC                                                                                                                                                   |
| ex3_61<br>64089_x1 | CM000<br>672.2/4<br>598461<br>0-<br>459848<br>10   | 14 | 0.008      | 28.2 | 1 | TCCAGCAGTAGTCAGCTGTCTGGACAGAACCATTCTGGGATCATGTTACACTGCTG<br>GGAGAAGAATGTCTTCTCTTCATCCAGTTGCGTCCATCACTGTTCTGGTGGTGTCTG<br>GCACTGGTGAAGGCAGAACTGTGCTTCCTTGAGAGTGTGCTGAGCATTACCTTG<br>GCTGCTTGGTTCTAGTCTAGGAGCAGACACA |
| ex3_61<br>68713_x1 | ENST0<br>000051<br>6728.1                          | 15 | 0.004      | 30.2 | 1 | TATATCTATTTGAGAGACCTAGTACAGTTACTGTCTGTGGCTGAGGTTTCCACTACAG<br>AT                                                                                                                                                   |
| ex3_61<br>71797_x1 | ENST0<br>000051<br>7079.1                          | 14 | 0.008      | 28.2 | 1 | ATGCCTCTATTTGACACATGAAACAGTTACTGCCTGCTGCTATGGTTTCCACTACAGA<br>TG                                                                                                                                                   |
| ex3_61<br>71970_x1 | CM000<br>669.2/2<br>991252<br>8-<br>299126<br>32   | 20 | 2E-06      | 40.1 | 1 | ATCCTCTTGTAGTTCATGAGCGTGATGATTGAGTATTCATGTGCATGTGTGAGATGTG<br>CCTCTCTGAACCTTGTTACAACCTTGGCACATTACCTGTCTGACC                                                                                                        |
| ex3_61             | CM000                                              | 15 | 0.004      | 30.2 | 1 | AACCTAAACATGACAACTGGGTTTTTCATGCTATTGCATGATACCTGCCTCCCTCAAAA                                                                                                                                                        |

|        |         |    |       |      |   |                                                              |
|--------|---------|----|-------|------|---|--------------------------------------------------------------|
| 72722_ | 678.2/1 |    |       |      |   | CTTGTTACATCATCATATCACTCACCTGATA                              |
| x1     | 146764  |    |       |      |   |                                                              |
|        | 1-      |    |       |      |   |                                                              |
|        | 114677  |    |       |      |   |                                                              |
|        | 29      |    |       |      |   |                                                              |
| ex3_61 | ENST0   | 14 | 0.008 | 28.2 | 1 | CTACAGATATTTTCTGAATTGGCAAGTCCACCAAGAACTATAAAAATGTGTGTGTGC    |
| 73830_ | 000036  |    |       |      |   | AA                                                           |
| x1     | 3367.1  |    |       |      |   |                                                              |
| ex3_61 | ENST0   | 15 | 0.006 | 30.2 | 1 | GTTGAGGTCTAACACGATAGGGCTTTATCTGTAGCCACACCATCTGGAAACATCTAG    |
| 74619_ | 000051  |    |       |      |   | TGT                                                          |
| x1     | 6440.1  |    |       |      |   |                                                              |
| ex3_61 | ENST0   | 15 | 0.005 | 30.2 | 1 | CTCCAATGAGGAGGAAACATCCTGCCTTACCCCTGTTTTAGCCTGGGAACCAGTAAT    |
| 76284_ | 000051  |    |       |      |   | TGT                                                          |
| x1     | 6331.1  |    |       |      |   |                                                              |
| ex3_61 | CM000   | 16 | 0.001 | 32.2 | 1 | TTGCTTTTGTAGCTTAAGTGTGATGATTGAGTTTGTATGTGCATGTGTGAGATGTGCC   |
| 77251_ | 663.2/1 |    |       |      |   | ACCCTCGAACCTTATTATAGCATGGGCACATTACCCATCTGACA                 |
| x1     | 670414  |    |       |      |   |                                                              |
|        | 35-     |    |       |      |   |                                                              |
|        | 167041  |    |       |      |   |                                                              |
|        | 536     |    |       |      |   |                                                              |
| ex3_61 | CM000   | 14 | 0.009 | 28.2 | 1 | ATCCTTTTGTAGTTCATAAGCATGATAACTGGGTTTTTCACACACATATGAGATGTGCC  |
| 81508_ | 663.2/1 |    |       |      |   | TCCCTCAAACCTTGCTACAGCATTGGTACATTATCTGTCTAACA                 |
| x1     | 742002  |    |       |      |   |                                                              |
|        | 30-     |    |       |      |   |                                                              |
|        | 174200  |    |       |      |   |                                                              |
|        | 129     |    |       |      |   |                                                              |
| ex3_61 | ENST0   | 18 | 0.009 | 28.2 | 1 | GGTTGTGGTGGTTTTCTTTCTGGTACATTTGTTAAGTTTTCAAATGAGCCTAACTCTG   |
| 81589_ | 000039  |    |       |      |   | CC                                                           |
| x1     | 0873.1  |    |       |      |   |                                                              |
| ex3_61 | ENST0   | 19 | 0.004 | 30.2 | 1 | CTGTGATGATGGCATTCTTAGGACAATTTTGGATTAATTATGAAAACAACACTACTCTCT |
| 82930_ | 000039  |    |       |      |   | G                                                            |
| x1     | 1313.1  |    |       |      |   |                                                              |
| ex3_61 | CM000   | 16 | 0.000 | 32.2 | 1 | ATCCTTTTGCAGCTCATGAGTGTGACGATTGGGTGTTTCATGCATGTGTGTGAGGTGT   |
| 82962_ | 673.2/6 |    | 7     |      |   | GCCACCCTCTGAACCTTGTTACAACATCAGCACATTACGTCTCTGAAC             |
| x1     | 615262  |    |       |      |   |                                                              |
|        | 1-      |    |       |      |   |                                                              |
|        | 661527  |    |       |      |   |                                                              |
|        | 25      |    |       |      |   |                                                              |
| ex3_61 | CM000   | 15 | 0.004 | 30.2 | 1 | CTGCAGCTAGTTAACCTGACTTGTCCACCTCCCTGCTGGGGGCTCAGTGTGCAATG     |
| 83056_ | 676.2/5 |    |       |      |   | GTTGCAAATGGAGATTCCCTGGTTGTGTATACACCTCATTTCTTGAATGTGTTGCTT    |

|        |         |    |       |      |   |                                                               |
|--------|---------|----|-------|------|---|---------------------------------------------------------------|
| x1     | 124409  |    |       |      |   | TAAGGGTTCTTGAAGACATTA                                         |
|        | 0-      |    |       |      |   |                                                               |
|        | 512442  |    |       |      |   |                                                               |
|        | 24      |    |       |      |   |                                                               |
| ex3_61 | CM000   | 14 | 0.009 | 28.2 | 1 | ATTCTTTTGTAAATTCATAAGCATGATGACTCGGTATTCACGTGCATGTGTGAGATGTG   |
| 83216_ | 663.2/5 |    |       |      |   | CCACCCTGGAACCTTGTTGCAACGTCAGCACATTATGGGTCTGACA                |
| x1     | 123135  |    |       |      |   |                                                               |
|        | 6-      |    |       |      |   |                                                               |
|        | 512312  |    |       |      |   |                                                               |
|        | 53      |    |       |      |   |                                                               |
| ex3_61 | CM000   | 14 | 0.008 | 28.2 | 1 | ATCTTTATACTTTTCAGGGATCAATTCTATAGTAGGTTACTAGAGAAATGTTTCTGAACA  |
| 84102_ | 664.2/7 |    |       |      |   | GAGTAGGGGGAGAAATCTCAATGAAAAGCTGCAGTAGCTCTCCTGAGCATGAAGCT      |
| x1     | 562795  |    |       |      |   | GGCAGGTGGTGCCACCTGGTGGTAGCCACTGCTTGCTGTTCGATGACCGTTCTTTGC     |
|        | 3-      |    |       |      |   | TCCTTGGACAAGGATAAGAGAGAGAGAGAGAACAACAAGCTGCGGGTT              |
|        | 756281  |    |       |      |   |                                                               |
|        | 68      |    |       |      |   |                                                               |
| ex3_61 | ENST0   | 25 | 1E-06 | 42.1 | 1 | TACTCCAGCCTGGATGACAGAGCCAGACTCTGTCTCGAAAAAAAAAAAAAAAAAAGCTT   |
| 84107_ | 000057  |    |       |      |   | AAT                                                           |
| x1     | 9231.1  |    |       |      |   |                                                               |
| ex3_61 | CM000   | 15 | 0.002 | 30.2 | 1 | ATCCTTTTGTAGTTCATAAGCACAAATGATTGAATTTTCATGCTCATGTGTGAGATATGC  |
| 84117_ | 672.2/5 |    |       |      |   | CTCACTCCAGTCTTGTTACAGTGTTAGCACATTACCTATCTGATA                 |
| x1     | 823876  |    |       |      |   |                                                               |
|        | 0-      |    |       |      |   |                                                               |
|        | 582386  |    |       |      |   |                                                               |
|        | 57      |    |       |      |   |                                                               |
| ex3_61 | ENST0   | 14 | 0.009 | 28.2 | 1 | AGATCATTTCAAAGAGGGCTCGTGGGGCTATGAAACCATGAGCTCTTAATGCTATGA     |
| 84217_ | 000036  |    |       |      |   | CCA                                                           |
| x1     | 3782.1  |    |       |      |   |                                                               |
| ex3_61 | CM000   | 15 | 0.002 | 30.2 | 1 | TTTAGAATGTCAA AATTGATTTTGTAAATAGTCAGGACAGGATAAACAGTCGCTATATTA |
| 85060_ | 663.2/2 |    |       |      |   | AGACCATGTACGTGTCCCTAGACCTAGTTCCTTCCCTACGTCTGTTTTTATAAATGCT    |
| x1     | 241796  |    |       |      |   | GGTGATAAAC                                                    |
|        | 41-     |    |       |      |   |                                                               |
|        | 224179  |    |       |      |   |                                                               |
|        | 767     |    |       |      |   |                                                               |
| ex3_61 | CM000   | 14 | 0.009 | 28.2 | 1 | ATCCTTTTGTAAATTCATAGGTGTGATTATTGGGTTTTTCATGCTCATGTGTGAGAGGTA  |
| 87252_ | 663.2/1 |    |       |      |   | CCTCCTCAAACCTTGTTACAACACGGGCACATTTCTGTCTGTTG                  |
| x1     | 736602  |    |       |      |   |                                                               |
|        | 00-     |    |       |      |   |                                                               |
|        | 173660  |    |       |      |   |                                                               |
|        | 097     |    |       |      |   |                                                               |

|                        |                                                  |    |            |      |   |                                                                                                                                                  |
|------------------------|--------------------------------------------------|----|------------|------|---|--------------------------------------------------------------------------------------------------------------------------------------------------|
| ex3_61<br>89662_<br>x1 | CM000<br>666.2/4<br>008298<br>3-<br>400831<br>06 | 14 | 0.009      | 28.2 | 1 | AGCCACCGCACCCGGCCGGGCTGTATTCTTACACTGACTGTATAGAAAGAGGAGAT<br>AGAGTAAACCTACCCCGTATACTTCAGCCCACGCCCTGTGCCTGTTCTGTATTATGA<br>AGCGGGGTTGG             |
| ex3_61<br>93266_<br>x1 | ENST0<br>000045<br>9339.1                        | 15 | 0.003      | 30.2 | 1 | CTGTGTGTAGAAATGTTTGCTCCTCTATCCTTTGGGAACAGGAATACATTTCATAACAT<br>GC                                                                                |
| ex3_61<br>93759_<br>x1 | CM000<br>679.2/2<br>655679<br>-<br>265578<br>2   | 15 | 0.002      | 30.2 | 1 | ATTCTTTTGTAGTTGCTACGTGTGACGACAGGGTGTTACACACACATGTGTAAGATGTA<br>CCACCCTCCAGCCTTGTTACAATGTCGTACATTACCCGACCGATG                                     |
| ex3_61<br>95510_<br>x1 | CM000<br>666.2/1<br>732088<br>2-<br>173207<br>46 | 19 | 0.004      | 30.2 | 1 | GGCTTCTCATTGAGCTCCTTTCTGTCCATTGATGGCAGTTGATGGATTTGCATGAGAA<br>GAAGAGAGAATTACAGAACTAGCGTTATTTTACTTTCTGTCTTTACAGAGGTATATTT<br>GGCTGTTTTGTGAGACATTC |
| ex3_61<br>96875_<br>x1 | ENST0<br>000038<br>3923.1                        | 24 | 1E-08      | 48.1 | 1 | CTGCAGCCTATTAAGCCAAGTTCCTTTTCTCATGGGGGGGCCAGTGTGCAAT<br>GGC                                                                                      |
| ex3_61<br>97314_<br>x1 | CM000<br>663.2/5<br>680952<br>-<br>568102<br>6   | 15 | 0.002      | 30.2 | 1 | CTCAGCTGGGCTTTTTTTAAGTAACAAGTACTGGGCCACTGACATGTAAAGAGGGA<br>AGTGAGGTGCTCCTGGAG                                                                   |
| ex3_61<br>97636_<br>x1 | CM000<br>674.2/9<br>326573<br>2-<br>932656<br>29 | 16 | 0.000<br>9 | 32.2 | 1 | ATCCTTTTGTAGTTCATAAGCATGATAATTGGGTTTTTCATGCTCATGTGTGAGCTGTA<br>CCTCCCTTAAACCTCGTTATGATGTTGACACATTACCTGTCTGACA                                    |
| ex3_62<br>02566_<br>x1 | ENST0<br>000036<br>3572.1                        | 15 | 0.004      | 30.2 | 1 | GGTCAATGATGTCGTGGCATGTATCAGCTGAATCCAAAGTTGATGTGAGTTCCAAAA<br>TTA                                                                                 |
| ex3_62                 | ENST0                                            | 14 | 0.009      | 28.2 | 1 | TTGATCTACCTCTGATGAAACCTGTGTTGGTGGGGACATCTGAGAGTGTTGATGAAT                                                                                        |

|        |         |    |       |      |   |                                                             |
|--------|---------|----|-------|------|---|-------------------------------------------------------------|
| 05430_ | 000036  |    |       |      |   | GCC                                                         |
| x1     | 4129.1  |    |       |      |   |                                                             |
| ex3_62 | CM000   | 17 | 0.000 | 34.2 | 1 | ATCCTGAGATTCATGAGTGTGATGGATTGGGTGTTTCGTATGCATGTGTGAGATGCCG  |
| 14202_ | 677.2/3 |    | 2     |      |   | CACCATTGAACCTTGTTAAGATATGGACACATTACCTGTCTGACA               |
| x1     | 289520  |    |       |      |   |                                                             |
|        | 0-      |    |       |      |   |                                                             |
|        | 328953  |    |       |      |   |                                                             |
|        | 01      |    |       |      |   |                                                             |
| ex3_62 | CM000   | 14 | 0.008 | 28.2 | 1 | ATCCTTTTGTGGTTCATGAGTGCGATGATTGGTTTTTACACATATATGTGAGATGTG   |
| 14418_ | 685.2/1 |    |       |      |   | CCTCCCTCAAACCTTGTTAGGAGTAGAAGGTAGGCACATTACCTATCTGACG        |
| x1     | 130011  |    |       |      |   |                                                             |
|        | 28-     |    |       |      |   |                                                             |
|        | 113001  |    |       |      |   |                                                             |
|        | 019     |    |       |      |   |                                                             |
| ex3_62 | CM000   | 18 | 0.008 | 28.2 | 1 | CTGTGTGTAGAAATGTTTGCTCCTCTATCCTTTGGGAACAGGAATACATTACATAACAT |
| 15927_ | 664.2/7 |    |       |      |   | GCTACATGTAAAAAGGACTCCCCAGGGTGGCCAATCTTATGGTAGAGGTTGTATGGT   |
| x1     | 548957  |    |       |      |   | AATATATTTCTCCTTCATAA                                        |
|        | 6-      |    |       |      |   |                                                             |
|        | 754897  |    |       |      |   |                                                             |
|        | 10      |    |       |      |   |                                                             |
| ex3_62 | AC099   | 15 | 0.002 | 30.2 | 1 | AGACUCCCAGCUCUGCCCAGUUACACUAGGCUUCGCCUGUGUGGCUUCUGUAAU      |
| 17519_ | 331.2/1 |    |       |      |   | GGGGAGGGAGAGAAAGGAUCUCCCCAGGACCUCAGAUUGGCUUUACUGUGGCAU      |
| x1     | 40721-  |    |       |      |   | CUCUUUCCUUGAGGGACACAAUAGGU                                  |
|        | 140854  |    |       |      |   |                                                             |
| ex3_62 | CM000   | 14 | 0.008 | 28.2 | 1 | GGCCTTTTGGTGCTTACCACAGACTGTGCTCTTTCACTGACTGAATAGAGAGAGGAG   |
| 18426_ | 663.2/2 |    |       |      |   | GCAGAGTAAACCTATCCTATATACACCTCAGTCCAAGCCTGGTCTGTATTATGAATGG  |
| x1     | 286524  |    |       |      |   | GGCAACATGG                                                  |
|        | 36-     |    |       |      |   |                                                             |
|        | 228652  |    |       |      |   |                                                             |
|        | 560     |    |       |      |   |                                                             |
| ex3_62 | ENST0   | 14 | 0.009 | 28.2 | 1 | TGGTTGTTACCAAGGCATTTAGCATGCAATTTCTCATTTGCTGTGGACACGACGAGAA  |
| 22057_ | 000038  |    |       |      |   | GA                                                          |
| x1     | 4772.1  |    |       |      |   |                                                             |
| ex3_62 | ENST0   | 15 | 0.004 | 30.2 | 1 | AACCCCTTTTCACTTTGCCAATTGGACTTATGTCTTTATTGATCATTCAAGTGAGCAA  |
| 23312_ | 000036  |    |       |      |   | A                                                           |
| x1     | 2604.1  |    |       |      |   |                                                             |
| ex3_62 | CM000   | 14 | 0.008 | 28.2 | 1 | AGCCTTGAAACTGACTCAAACAATAGGTTTTTATATTTATGTGTGAGATGTGCCTCT   |
| 28538_ | 685.2/1 |    |       |      |   | TTCAAACCTTGTTACAACCTTTGGCACATTACCCATCTGATG                  |
| x1     | 249285  |    |       |      |   |                                                             |
|        | 19-     |    |       |      |   |                                                             |

|        |                                |    |       |      |   |                                                              |  |
|--------|--------------------------------|----|-------|------|---|--------------------------------------------------------------|--|
|        | 124928                         |    |       |      |   |                                                              |  |
|        | 617                            |    |       |      |   |                                                              |  |
| ex3_62 | AC092                          | 14 | 0.008 | 28.2 | 1 | AUGCCCUUUUAAGGUUGAUGUGGUGUCUUUAAGAAGCUAACAUAGAAGGAUAAAGU     |  |
| 32579_ | 814.2/1                        |    |       |      |   | AAGUCUCUACAAAACCCAGAGAAGAGACUGGAAAACUCCUCUCUGGAUCCUGCCU      |  |
| x1     | 36717-<br>136838               |    |       |      |   | GGAGUCACAGCU                                                 |  |
| ex3_62 | ENST0                          | 18 | 0.009 | 28.2 | 1 | AGATTGATGATGGCACCCCCATAAAACCATTCTTAGGAAATCTGAACAAAATGAGTG    |  |
| 32934_ | 000039                         |    |       |      |   | AA                                                           |  |
| x1     | 1251.1                         |    |       |      |   |                                                              |  |
| ex3_62 | ENST0                          | 14 | 0.008 | 28.2 | 1 | TGGATCGATGGTGACTGTTGATGGCATATGACTCACATATGATGAGTACGTATCTGG    |  |
| 33437_ | 000036                         |    |       |      |   | AAC                                                          |  |
| x1     | 5029.1                         |    |       |      |   |                                                              |  |
| ex3_62 | CM000                          | 14 | 0.008 | 28.2 | 1 | CATGTATAATGATATATTGGTAACACTGCAGACTTGGGGAAGCCAGCCAACCTTGA     |  |
| 37696_ | 673.2/1                        |    |       |      |   | GATCTGAGTGTGAG                                               |  |
| x1     | 092635<br>64-<br>109263<br>494 |    |       |      |   |                                                              |  |
| ex3_62 | CM000                          | 14 | 0.009 | 28.2 | 1 | ATCCTTTTGTAGTTCATGAATGTGATGATTGGGCATTCACGTGGATGTGTGAGTGCTA   |  |
| 38857_ | 665.2/1                        |    |       |      |   | CCCTCGAAGCTTGTTTCAACATTGGCACATTATGCATCTGACT                  |  |
| x1     | 215912<br>94-<br>121591<br>394 |    |       |      |   |                                                              |  |
| ex3_62 | CM000                          | 15 | 0.003 | 30.2 | 1 | CATCTGTGATTATCCTATTCTGAACCTGAATTTCTACTAGAAAAAATTATATGAATCT   |  |
| 40625_ | 666.2/7                        |    |       |      |   | GGCTTCTGAGAT                                                 |  |
| x1     | 640207<br>6-<br>764021<br>46   |    |       |      |   |                                                              |  |
| ex3_62 | CM000                          | 14 | 0.009 | 28.2 | 1 | ATCGTTTTGTAGTCTATTATAAGCGTGATGATTGGGTGTTTCATATGCATATGTGAGAT  |  |
| 42081_ | 670.2/1                        |    |       |      |   | GTGCCACCCTCAAATCTTGTTATGACGTCATCAGCACGTTACTCTTCTGATA         |  |
| x1     | 023886<br>35-<br>102388<br>526 |    |       |      |   |                                                              |  |
| ex3_62 | ENST0                          | 17 | 0.000 | 34.2 | 1 | GGGTCAGTGATGAGAACCTTATATTGTCCTGAAGAAAGGTGATGACTTAAAAATCATG   |  |
| 48640_ | 000036                         |    | 3     |      |   | CT                                                           |  |
| x1     | 5318.1                         |    |       |      |   |                                                              |  |
| ex3_62 | ENST0                          | 20 | 0.000 | 32.2 | 1 | TAATGCTATACTTTTCATGGGTCATTTCTATAGTTTGTTATTAGAGAAGTTTCTCTGAAT |  |

|        |         |    |       |      |   |                                                            |
|--------|---------|----|-------|------|---|------------------------------------------------------------|
| 49115_ | 000036  |    | 6     |      |   | G                                                          |
| x1     | 4459.2  |    |       |      |   |                                                            |
| ex3_62 | CM000   | 16 | 0.001 | 32.2 | 1 | ATTCTTTAGTAGTTCATAATGCTATGATTGGGTTTCCATGTGCACATGTAAGATGTGC |
| 50012_ | 682.2/5 |    |       |      |   | CTCTCTCAAGCCTTGTTGTGACATCAGCACATTACCCATCTGATG              |
| x1     | 647564  |    |       |      |   |                                                            |
|        | 3-      |    |       |      |   |                                                            |
|        | 564757  |    |       |      |   |                                                            |
|        | 45      |    |       |      |   |                                                            |
| ex3_62 | ENST0   | 14 | 0.009 | 28.2 | 1 | TACCTCCCAGGATGGCATCTGGAAGTGGATAGTATTCTGCCAGCTTTGGAAACTGGA  |
| 50099_ | 000036  |    |       |      |   | TGA                                                        |
| x1     | 3750.1  |    |       |      |   |                                                            |
| ex3_62 | ENST0   | 15 | 0.004 | 30.2 | 1 | ATTTCTATGGAAAAGAGGTGAAGTGGACAGAAGGGATGTCTGAAATTCTATCCTGAG  |
| 51737_ | 000040  |    |       |      |   | GCT                                                        |
| x1     | 8373.1  |    |       |      |   |                                                            |
| ex3_62 | CM000   | 14 | 0.008 | 28.2 | 1 | ATCTTTTTGTAGTTCATGAGCGTGATGACTGAGTGTTTCATGTGCATGTGTGAGGCGT |
| 51744_ | 669.2/1 |    |       |      |   | GCCACCCTTAAACCTTGTTATAACATCAGCACATTACCCACATGACA            |
| x1     | 381210  |    |       |      |   |                                                            |
|        | 88-     |    |       |      |   |                                                            |
|        | 138121  |    |       |      |   |                                                            |
|        | 191     |    |       |      |   |                                                            |
| ex3_62 | ENST0   | 16 | 0.000 | 32.2 | 1 | CCTCATTTTCTTGGCAGGAACTTGTAGTCCCCTCCCTGTTATGTACAGAGGCAAAG   |
| 53614_ | 000041  |    | 7     |      |   | GGA                                                        |
| x1     | 1095.1  |    |       |      |   |                                                            |
| ex3_62 | ENST0   | 38 | 1E-16 | 75.8 | 1 | TGGACCAGTGATGAATATCATGGGGTTTCTGAAACAACATTTTTGATTAAACCCATCT |
| 58773_ | 000036  |    |       |      |   | GC                                                         |
| x1     | 3345.3  |    |       |      |   |                                                            |
| ex3_62 | CM000   | 15 | 0.006 | 30.2 | 1 | ATCCTCCTATAGTTCCTCAATGTGATGACTGGGTGTTCACTCATTGGCGAGATGT    |
| 59216_ | 669.2/5 |    |       |      |   | GCCTCTCTCAAACCTTGTTTCAGATGCTGCAGACACATTACCCATCAGATG        |
| x1     | 485395  |    |       |      |   |                                                            |
|        | -       |    |       |      |   |                                                            |
|        | 548550  |    |       |      |   |                                                            |
|        | 1       |    |       |      |   |                                                            |
| ex3_62 | CM000   | 17 | 0.000 | 34.2 | 1 | ATCCCTTTGTAGCTCATAAGCAAGATGACTGGGTGTTACGCACATGTGTGAGGTGT   |
| 62472_ | 673.2/1 |    | 3     |      |   | GCCTCCCTTAAACCTTGTTAAGGGTTGTTACCCGTGTGATG                  |
| x1     | 262816  |    |       |      |   |                                                            |
|        | 57-     |    |       |      |   |                                                            |
|        | 126281  |    |       |      |   |                                                            |
|        | 754     |    |       |      |   |                                                            |
| ex3_62 | ENST0   | 14 | 0.009 | 28.2 | 1 | TGTTCCCGATCTGGTAGAGTAGCATCTGGTTGGTGGTGACCATCTAATACCAGCCAG  |
| 63111_ | 000039  |    |       |      |   | GGA                                                        |



|                        |                                      |    |       |      |   |                                                                                                                                                                                                                                   |  |
|------------------------|--------------------------------------|----|-------|------|---|-----------------------------------------------------------------------------------------------------------------------------------------------------------------------------------------------------------------------------------|--|
|                        | 6-<br>241333<br>17                   |    |       |      |   |                                                                                                                                                                                                                                   |  |
| ex3_62<br>82896_<br>x1 | ENST0<br>000039<br>1159.1            | 15 | 0.003 | 30.2 | 1 | ATTTTACATAGCGCTGCAGATGTGGCTGCTGTGTCACATTTGTGTTATTAGGTGGCA<br>GAG                                                                                                                                                                  |  |
| ex3_62<br>82950_<br>x1 | AL132<br>709.5/1<br>32469-<br>132398 | 31 | 3E-10 | 54   | 1 | UGGAUCGAUGAUGACUGCUGGUGGGCGUAUGAGUCAUAUGCGAUGAAUACGUGUC<br>UAGAACUCUGAGGUCCAU                                                                                                                                                     |  |
| ex3_62<br>83062_<br>x1 | CM000<br>672.2/1<br>105763           | 14 | 0.008 | 28.2 | 1 | GTCCTTTTGTAAATGCATAAGCACGATGATTGGGTTTTTCGTGTTTCATGTGAGTCATGCC<br>TCCCTCAAACCTTGTTAGGACATTGGCACATTACCAATGTGATG                                                                                                                     |  |
|                        | 60-<br>110576<br>461                 |    |       |      |   |                                                                                                                                                                                                                                   |  |
| ex3_62<br>86778_<br>x1 | ENST0<br>000036<br>5391.1            | 23 | 4E-08 | 46.1 | 1 | GGGTCAATGATGAGAACCTTATATTGTCCTGAAGAGCGGTGATGACTTAAAAATCAT<br>GCT                                                                                                                                                                  |  |
| ex3_62<br>91112_<br>x1 | CM000<br>671.2/8<br>345227           | 15 | 0.002 | 30.2 | 1 | ATCTCTTTGTAGTTCACAAGCATGGTGATTGGGTGCTCAAGCCCATGTGTGAGGTGT<br>GCCTCCCTCAAACCTTGTTACAACGTAGGCACAGCATCACCTGACG                                                                                                                       |  |
|                        | 3-<br>834523<br>75                   |    |       |      |   |                                                                                                                                                                                                                                   |  |
| ex3_62<br>91609_<br>x1 | ENST0<br>000038<br>4300.1            | 15 | 0.003 | 30.2 | 1 | ATCCAAGGGGATTCCCTCTCCAAGGGAACATGCAGTGCCCTCTCAGGAAAGTAACA<br>ACC                                                                                                                                                                   |  |
| ex3_62<br>96585_<br>x1 | CM000<br>665.2/4<br>525562           | 15 | 0.004 | 30.2 | 1 | AATTGTATACTTTCAGGGATCATTCCATAGGTTGTTACTAGAGAAGTTTTTTTAGATGT<br>GTAGAACACTGGAAACCACGAGGAGGAGGCGCAGCATTCTCTCTTGACCATGAAGC<br>CGGCTCTTGGTGTTGTTTCATTGCAACTGTCATTTGCCATTGATGATCGTTCTCTTCC<br>TCTGGGAGAGTAAGAGGGGAGAGGACACAGTTTGAGTGGT |  |
|                        | 0-<br>452554<br>09                   |    |       |      |   |                                                                                                                                                                                                                                   |  |
| ex3_62<br>96758_<br>x1 | CM000<br>665.2/3<br>269424           | 14 | 0.009 | 28.2 | 1 | AAGACTACACTTTCAGGGATCATTCTACAGTTTGTTACTGGAGAAGTTTCTCTGAAA<br>GTGTAGAGTACCAAACACT                                                                                                                                                  |  |
|                        | 0-<br>326941<br>64                   |    |       |      |   |                                                                                                                                                                                                                                   |  |

|                        |                                                    |    |            |      |   |                                                                                                                    |
|------------------------|----------------------------------------------------|----|------------|------|---|--------------------------------------------------------------------------------------------------------------------|
| ex3_62<br>96902_<br>x1 | CM000<br>680.2/3<br>573043<br>-<br>357294<br>0     | 15 | 0.004      | 30.2 | 1 | ATCTTTTTGTGATTCATCAGCATGATGATTGGGTCTTCACACAAAAGTTTAAGATGTG<br>CCTCCCTCACATCTTATTATCGTGTGTCAGCATATTTCTGTCTGAAG      |
| ex3_62<br>98692_<br>x1 | CM000<br>663.2/1<br>012287<br>65-<br>101228<br>664 | 16 | 0.000<br>7 | 32.2 | 1 | ATCCTTTTGTAGTTCATAAGCGTGATCACTGGGTGTTTACGCACGTGTGAGATATGCC<br>ATCCTTGAACCTTGTTATGATGTCAGCACATTACCCATCTGACA         |
| ex3_62<br>99991_<br>x1 | ENST0<br>000040<br>8198.2                          | 20 | 0.000<br>5 | 32.2 | 1 | AAGATGACACTTTGAGGCATCGTGTCTATGGTTCATTACTACAGAAGCTTCTCTGGAT<br>GT                                                   |
| ex3_63<br>02708_<br>x1 | CM000<br>676.2/1<br>023589<br>02-<br>102358<br>799 | 15 | 0.004      | 30.2 | 1 | ATTCTTTTGTAGTTCATAGGCATAATGATTGGGTTTTTCATGCTCATGTATGACCTGTG<br>CCTTCCTCAAACCTTTGCTATGATGTTGGCACATTACCTAGCTGATA     |
| ex3_63<br>03324_<br>x1 | ENST0<br>000051<br>6123.1                          | 14 | 0.008      | 28.2 | 1 | GGATGGATGACGACTTAAAAATGAATCTCGTTGGAATCTGAGCAAAACGAGTGAGCA<br>AAC                                                   |
| ex3_63<br>06129_<br>x1 | CM000<br>663.2/1<br>561921<br>76-<br>156192<br>063 | 14 | 0.009      | 28.2 | 1 | TTGCCGCCACACAACCAAATTAATAACACAGAAGGGTAAGGTAAGTCTCCATT<br>AAACCCAGGAAAGAGACTGGAAAACCTCCTCTTTGGAGCCTGTCTATAGTCACAGGT |
| ex3_63<br>06246_<br>x1 | ENST0<br>000051<br>6303.1                          | 23 | 1E-05      | 38.2 | 1 | GTGTTTAGAAGACCACATCTTCATCCTGAAAGCACAGATGTGTGGAAACCAATGACC<br>GAG                                                   |
| ex3_63<br>08527_<br>x1 | CM000<br>677.2/2<br>035218<br>1-<br>203520<br>86   | 16 | 0.001      | 32.2 | 1 | ATCCTTCTGTGGCTGATATGTGTGATGAGGGGGTTTTTCACACTCTTGCGTGGGACGT<br>GCAACCTCTTTAGAACAGTGGCACATTACCTGTCCTACA              |
| ex3_63                 | CM000                                              | 15 | 0.003      | 30.2 | 1 | CTGCAACCAATTAAGCCGACCTAGTTCCTTTCTCTTTGGGGCCTGGTGTTC AATAG                                                          |

|                 |                                                    |    |            |      |   |                                                                                                                                   |
|-----------------|----------------------------------------------------|----|------------|------|---|-----------------------------------------------------------------------------------------------------------------------------------|
| 19045_x1        | 673.2/8<br>304159<br>8-<br>830414<br>64            |    |            |      |   | CTGCAAACAGCAGCTTCCTTGGTAGTGTATGCAGCCTGTTTCTTGTATGGGTTGCTC<br>TAAAGGACCTTGGAGACAGCC                                                |
| ex3_63_28416_x1 | CM000<br>663.2/2<br>243367<br>91-<br>224336<br>889 | 16 | 0.000<br>7 | 32.2 | 1 | ATCCTTTTGTAGTTCCTAAGTGTGAAGAATGGGTGTTTCATGCAGAAGGATAAGATGTG<br>CTACCCTCAAACCTTGTTCCGTGCATATTACACGTCTGACA                          |
| ex3_63_29390_x1 | ENST0<br>000036<br>4764.1                          | 15 | 0.004      | 30.2 | 1 | GGGTCAATGATGAGATGTTACCTTGAAGAGAAATGATGACGTAAAAATTAAGTTCAGT<br>TG                                                                  |
| ex3_63_30461_x1 | ENST0<br>000036<br>2917.1                          | 36 | 1E-15      | 71.9 | 1 | GCATGGGTTTGGATTTATGATGGGCTGGATTCCCTAGGCCTCTCATAGTACCCCATG<br>CCA                                                                  |
| ex3_63_30836_x1 | CM000<br>682.2/4<br>171260<br>0-<br>417124<br>79   | 14 | 0.009      | 28.2 | 1 | GTGTCCTTTTAAGGTTGACACAGTGCTTTAAGAGCCTAACACAGAAAGGTAAAGTAA<br>GTTTCCGTAAAACCCAGAAATGATATTGCAAATTCCTCTTTGAATCATGTCTGGAGT<br>CACAGCT |
| ex3_63_31636_x1 | CM000<br>663.2/1<br>121954<br>94-<br>112195<br>606 | 15 | 0.003      | 30.2 | 1 | ATCAGTTTAACATTTAAAAAATGTATCAAGGCGTGGTGATTAGGTTTTCACACTCAT<br>GTGTGAGATGTGCCTCCCTTGAACCTTGTTACATTGGCACTTACCCATTTGACA               |
| ex3_63_32022_x1 | ENST0<br>000045<br>9368.1                          | 21 | 1E-06      | 42.1 | 1 | ATCCTCTTGTAGTTCATGAGCGTGATGATTGAGTATTCATGTGCATGTGTGAGATGTG<br>CC                                                                  |
| ex3_63_32624_x1 | CM000<br>676.2/6<br>365911<br>9-<br>636591<br>92   | 24 | 0.001      | 32.2 | 1 | TAGACTGTACTTTTCAGGGATCATTCTGTAATTCGTTACTAGAGAAATTTCTCTGAATG<br>TGTAGAGCAGTTAAT                                                    |
| ex3_63_34634_x1 | AC010<br>653.10/                                   | 15 | 0.002      | 30.2 | 1 | CUGCAGACAGUUAAGCCAACUGAGUJCCUJCCUCAGGGAGGCCAGUGUACA<br>GGCUGCCCACAGCAGCUUCCUUGGUAGCGUACUCAGCCUGUUUCUUGUAUGGGU                     |

|        |         |    |       |      |   |                                                             |
|--------|---------|----|-------|------|---|-------------------------------------------------------------|
| x1     | 163838  |    |       |      |   | UGCUCUAAGGGACCUUAGAGACAGGC                                  |
|        | -       |    |       |      |   |                                                             |
|        | 163972  |    |       |      |   |                                                             |
| ex3_63 | ENST0   | 15 | 0.004 | 30.2 | 1 | CTACAATCATGGCAATATTTTTGTCAACAGCGGTTACCTAGTGAATGTTGATACTTT   |
| 34823_ | 000038  |    |       |      |   | G                                                           |
| x1     | 4713.1  |    |       |      |   |                                                             |
| ex3_63 | CM000   | 15 | 0.005 | 30.2 | 1 | TTACAGTCAATTAAGCCAATCATGTTCCCTTTCTTGTAAAGGGCCAGGTGTGCCATGG  |
| 37957_ | 666.2/4 |    |       |      |   | CTGCGAACAGCAGCCTTCTCGGTAGTATGTGCACCGTGTTGCTTGTATGTTGTAAGC   |
| x1     | 893638  |    |       |      |   | ATTGCCCTAAGGACCTTGGAGACAGCC                                 |
|        | 1-      |    |       |      |   |                                                             |
|        | 489365  |    |       |      |   |                                                             |
|        | 21      |    |       |      |   |                                                             |
| ex3_63 | CM000   | 14 | 0.009 | 28.2 | 1 | TGCACTTGTGTTTTGTTAACTGTGAACAAAGACTTATAGAGAAGTGCAAAAAATAAA   |
| 38144_ | 663.2/1 |    |       |      |   | TCCTCTTTTGCAACCCAGAACTCATTGTTTAGTAAGGGTTTTGATACATATAAAAGAG  |
| x1     | 176887  |    |       |      |   | ATATT                                                       |
|        | 42-     |    |       |      |   |                                                             |
|        | 117688  |    |       |      |   |                                                             |
|        | 621     |    |       |      |   |                                                             |
| ex3_63 | ENST0   | 15 | 0.003 | 30.2 | 1 | GATGCCTTCCGGAACATGCCAGCACCGCAGATGCTGGCAGTCTGCTGTGCCCGTGA    |
| 42356_ | 000036  |    |       |      |   | TATT                                                        |
| x1     | 4863.1  |    |       |      |   |                                                             |
| ex3_63 | ENST0   | 14 | 0.008 | 28.2 | 1 | CCTGGGTGATGATAAGCAAATGATGCCTGAATGTGAAGGTCATACTCGGCTTTAGCT   |
| 42760_ | 000036  |    |       |      |   | GAT                                                         |
| x1     | 3202.1  |    |       |      |   |                                                             |
| ex3_63 | ENST0   | 14 | 0.009 | 28.2 | 1 | ATCCTGTTGTAGTTCATAAGCATGATGATTTGGTGTTCACGTGCATGTGTGGGATGTG  |
| 44942_ | 000045  |    |       |      |   | CC                                                          |
| x1     | 8863.1  |    |       |      |   |                                                             |
| ex3_63 | CM000   | 15 | 0.007 | 30.2 | 1 | AGCCTCCTGGTGTCTCAGCACAGGATGTGTTCTTACCCTAACCAAATAGAAAGAGTAG  |
| 45138_ | 669.2/1 |    |       |      |   | GCTGAATTAACCTATGCCATATACACCTCAACCCAGGCCCTGCAACTCCTCTGTATTG  |
| x1     | 381881  |    |       |      |   | TCAATGGGTGGACATGG                                           |
|        | 29-     |    |       |      |   |                                                             |
|        | 138187  |    |       |      |   |                                                             |
|        | 998     |    |       |      |   |                                                             |
| ex3_63 | CM000   | 15 | 0.003 | 30.2 | 1 | ATCCTTTTGTAGTTGATGAACAATGATGATTGGGTGTTTCATGCACATGCGTGAGATGT |
| 45416_ | 671.2/1 |    |       |      |   | GTCACCCTCAAACCCTTACGTGGCAGGTTACCCATCTGACG                   |
| x1     | 330930  |    |       |      |   |                                                             |
|        | 52-     |    |       |      |   |                                                             |
|        | 133093  |    |       |      |   |                                                             |
|        | 151     |    |       |      |   |                                                             |
| ex3_63 | KV766   | 15 | 0.002 | 30.2 | 1 | ATCCTTTTATAGTTCATAAGCATGATGATTGGGTTTTTGCACACGTGTAATATGTGCCT |

|                 |                                                    |    |       |      |   |                                                                                                                     |
|-----------------|----------------------------------------------------|----|-------|------|---|---------------------------------------------------------------------------------------------------------------------|
| 49352_x1        | 194.1/1<br>8640-<br>18741                          |    |       |      |   | CCCTCAAACCATGTTATGACCTCAGCATATTACCTGTCTGATA                                                                         |
| ex3_63_49389_x1 | CM000<br>675.2/1<br>027218<br>02-<br>102721<br>905 | 16 | 0.002 | 32.2 | 1 | ATCCTTTTGTGGTTCATACATGTGGTGATTGGGTTTTCACACTCACATGTGAGATGTG<br>CCTCCCTCCAACCTTGTTATGATGTCAGCACATTACCCATCTGACA        |
| ex3_63_51480_x1 | ENST0<br>000051<br>6329.1                          | 14 | 0.009 | 28.2 | 1 | AGCACTTGTATGTTTTAACATGTGGACATTTATAGACAGGTTCAAAAAGTCCTCTTGC<br>AA                                                    |
| ex3_63_52698_x1 | CM000<br>667.2/6<br>623123<br>2-<br>662311<br>29   | 14 | 0.009 | 28.2 | 1 | ATCCTTTTGTGGTTGGTAAGCATGATAACTGGATTTTCACATTCATGTGTGAAATGTG<br>CCTCCTCAAGGCTTGTTACCATGTAGGCACATTACCCAACCTGATG        |
| ex3_63_54001_x1 | ENST0<br>000036<br>3622.2                          | 20 | 2E-06 | 40.1 | 1 | AAGGCTATACTTTCAGGAATCATTCTATAGTTTGTTACAAGAGAAGTTTCTCTGAATG<br>T                                                     |
| ex3_63_57901_x1 | CM000<br>664.2/1<br>294274<br>22-<br>129427<br>525 | 15 | 0.004 | 30.2 | 1 | ATGTTTTTGTGGTTTATGAATGTGATGATTGGGTTTTCACACTCAAGTGTGAGACGTG<br>CCTCTCTCAGATCTTGTTCCAATGTCAGTACATTACCGATCTGACA        |
| ex3_63_58809_x1 | CM000<br>684.2/3<br>195340<br>4-<br>319535<br>06   | 14 | 0.008 | 28.2 | 1 | ATCTTTTTGTAGTTCATAAGTGTGATGATTGGGTTTTGACATGCAGGTGTGAGATGTG<br>CCACCCTCAAACCTTGTTACAACATAGACATGTGACCCTCTGATG         |
| ex3_63_61713_x1 | CM000<br>671.2/7<br>567690<br>7-<br>756770<br>16   | 14 | 0.008 | 28.2 | 1 | ATCCTTTTGGGGTTCATAAGCGTGATGACTGGGTTTTTGCACACTCATGTGTGAGATG<br>CACTTCTCTCAAACCTTTTTGCAATGTTGGCATACTATCATACCTGCTTGATG |

---

(b)

| Qseqid             | Sseqid                                         | NT | Evalue | Bitscore | Number | Sequence                                                                                  |
|--------------------|------------------------------------------------|----|--------|----------|--------|-------------------------------------------------------------------------------------------|
| co3_23_63374_x5590 | CM0006<br>64.2/231<br>456523-<br>2314564<br>44 | 18 | #####  | 36.2     | 5590   | TGGATATGATGACTGATTACCTGAGAAATAATTGATGAAATCTCAAGAAAATTC<br>CTCTAGATAGTCAAGTTCTGATCCAG      |
| co3_28_21260_x4135 | ENST00<br>0003642<br>81.1                      | 14 | #####  | 28.2     | 4135   | CTAAAACAATGTCAATAGTTTTTCATCAACAGCAGTTGAACCTAGTAAGTGTCG<br>ATACTTT                         |
| co3_29_85674_x3730 | ENST00<br>0003843<br>20.2                      | 14 | #####  | 28.2     | 3730   | CTGGTTGCATGATGAATAAAATCAAATCACCATCTTTCGGCTGAGTTCGTGAT<br>GGATTTG                          |
| co3_29_93122_x3717 | ENST00<br>0003840<br>48.1                      | 16 | #####  | 32.2     | 3717   | ATTCGTGATGACTGATCATTCTTCACTTTGACCAGATGTCTACTGAAGAAAG<br>CCTGCGT                           |
| co3_33_55757_x2884 | CM0006<br>73.2/628<br>53395-<br>6285332<br>5   | 20 | #####  | 40.1     | 2884   | CTCACCAGTGATGAGTTGAATACCGCCCCAGTCTGATCAATGTGTGACTGAAA<br>GGTATTTTCTGAGCTGTG               |
| co3_40_65880_x1811 | AY34960<br>6.1/1-85                            | 15 | #####  | 30.2     | 1811   | CCCCUAUCUCUCAUGAUGAACACAUAUGCCUCUGAGCUGCUGUGAUUUUCU<br>GGCUUCAAGUAAACGCUCUGAAGAAGAGAUGGGG |
| co3_43_66794_x1475 | ENST00<br>0006272<br>53.1                      | 21 | #####  | 42.1     | 1475   | AAGACTATACTTTTCAGGGATCATTCTATAGTTTGTTACTAGAGAAGTTTCTCT<br>GAACGT                          |
| co3_45_57968_x1281 | AB06182<br>0.1/3401-<br>3472                   | 28 | #####  | 56       | 1281   | UCAAAAUGAUGAGAUUCCACUUAUUUGGUCCGUGUUUCUGAAACACAUGAU<br>AUUUGUGGAAAUUCUGACUUG              |

|                           |                                                |    |       |      |      |                                                                                                                                               |
|---------------------------|------------------------------------------------|----|-------|------|------|-----------------------------------------------------------------------------------------------------------------------------------------------|
| co3_47<br>70375_<br>x1115 | ENST00<br>0004481<br>88.1                      | 29 | ##### | 58   | 1115 | TGGAGGTGATGAACTGTCTGAGCCTGACCTTGTAGAATGGAGGCAAAAAAC<br>TGATTTAA                                                                               |
| co3_48<br>12047_<br>x1078 | AJ60948<br>3.1/2-129                           | 28 | ##### | 56   | 1078 | CUGGAGGACUAAGAAGGCUGAGUCUGAUGAAGUAAGACUUUGCUGAUACA<br>UCCUCCUAGAAAAAGGGUUGGAGAGAGCAGCCUUCACUGAAGAGUAUCA<br>CAGGGCUGACUGUACUACCCAACACUC        |
| co3_48<br>17430_<br>x1075 | CM0006<br>85.2/135<br>212441-<br>1352125<br>13 | 18 | ##### | 36.2 | 1075 | AAGACTATACTTGCAGGGATCATTTCTGTAGTTGGTTACTAGAGAAGTTTCTT<br>GTCTGTAGTTGGTTATTAGA                                                                 |
| co3_50<br>20108_<br>x938  | CM0006<br>73.2/628<br>53732-<br>6285366<br>3   | 24 | ##### | 48.1 | 938  | GTTTGTGATGACTTACATGGAATCTCGTTCGGCTGATGACTTGCTGTTGAGAC<br>TCTGAAATCTGATTTTC                                                                    |
| co3_51<br>18822_<br>x875  | AC09217<br>4.5/1568<br>14-<br>156683           | 23 | ##### | 46.1 | 875  | CUUCCCAUUUAAUUUGCUGCUUAUAGUCUCACUGUGAUUAGAGCAAUUUAC<br>ACAUGGGAUAAAAUAAUUAUUGAGCCACUGUAAAUUGAGAUGAAGUAACCGU<br>UUUCAUAUCUUCUGCAUGGACUAGACAUUG |
| co3_51<br>63667_<br>x849  | AJ23885<br>3.1/1-62                            | 25 | ##### | 50.1 | 849  | CACAGAUGAUGAACUUAAUUGACGGGCGGACAGAAACUGUGUGCUGAUUGU<br>CACGUUCUGAUU                                                                           |
| co3_51<br>88031_<br>x833  | AC02536<br>2.12/104<br>594-<br>104663          | 40 | ##### | 79.8 | 833  | GCUGUGAUGACAUCCAAUUAAAGCACGUGUUAGACUGCUGACGCGGGUG<br>AUGCGAACUGGAGUCUGAGC                                                                     |

|                          |                                              |    |       |      |     |                                                                                                                                                                                                                                                                               |
|--------------------------|----------------------------------------------|----|-------|------|-----|-------------------------------------------------------------------------------------------------------------------------------------------------------------------------------------------------------------------------------------------------------------------------------|
| co3_53<br>76913_<br>x742 | ENST00<br>0003641<br>55.1                    | 45 | ##### | 65.9 | 742 | GTTTCTGATGAAGCCTATGTTGGTAGGGACA<br>ACTAAGGTTGTTGATGAATGCT<br>AACAGCT                                                                                                                                                                                                          |
| co3_54<br>28064_<br>x720 | CM0006<br>79.2/428<br>1844-<br>4281769       | 25 | ##### | 34.2 | 720 | AAGACTATCCTTTCAGGGATCATTCTATAGTTT<br>GTTACTATAGAAGTTTTCTG<br>AAGGTGTAGAGCACCAAAGGAT                                                                                                                                                                                           |
| co3_54<br>33817_<br>x717 | ENST00<br>0003626<br>07.1                    | 26 | ##### | 52   | 717 | CTGCATCCACTGATAGACCTTGAACAATTTACT<br>GTTGTTCTTTTGGTTTGC<br>ACTAGGATG                                                                                                                                                                                                          |
| co3_54<br>50915_<br>x708 | AJ22402<br>8.1/3-79                          | 28 | 6E-11 | 56   | 708 | CAGAAUACAUGAUGAUCUCAAUCCAACUUGAAC<br>UCUCUCACUGAUUACUUG<br>AUGACAAUAAAAUAUCUGAUUUCUG                                                                                                                                                                                          |
| co3_54<br>65725_<br>x701 | CM0006<br>82.2/179<br>62946-<br>1796271<br>0 | 29 | 2E-11 | 58   | 701 | GTGAAATGATGATTTCAGTTTATCCATTCGCTGAG<br>TGCGCTGCACTGACCTTCT<br>TCCAAGCCTCAGTTCCTGTTCTAGGAACTTGAGG<br>CTATGTAGCCTGAAAATGC<br>CCTGCAGTCTGCAGTGTCTACTGTGAACTGCTT<br>GTGTGTTGGCAGGCTACC<br>GGTAAGAATGTTGGTGTGTCAGCAGGGACGGGG<br>CCCTCTGAGACCCATCTCA<br>CAAAGATGAGTGGTAAAATCTGATCAC |
| co3_55<br>65224_<br>x663 | AC10444<br>6.2/1455<br>01-<br>145577         | 35 | ##### | 69.9 | 663 | AAUGUGAAGCAAUGAUGAUAAACUGGAUCUGAC<br>UGACUGUGCUGAGUCU<br>GUUCAAUCCAACCCUGAGCUUCAUGUU                                                                                                                                                                                          |

|                          |                                              |    |       |      |     |                                                                                                                                                   |
|--------------------------|----------------------------------------------|----|-------|------|-----|---------------------------------------------------------------------------------------------------------------------------------------------------|
| co3_55<br>84997_<br>x654 | CM0006<br>72.2/890<br>61131-<br>8906103<br>1 | 14 | ##### | 28.2 | 654 | ATTCTTTTGTATCTCACAAGTGTGACTGGGTTTTTAGGCTCATGTGTGAGATGA<br>GCTTCCCTCAAAAATTGTTGTGACTGTGGCATGTTACCTGTGTGATG                                         |
| co3_56<br>57610_<br>x621 | AP00127<br>3.4/3902-<br>3830                 | 35 | ##### | 69.9 | 621 | CGAUGUUAUGAUGAUGGGCGAAAUGUUCAACUGCUCUGAAGGGGCUGAAU<br>GAAAUGGCCUUUCUGAACAUCC                                                                      |
| co3_57<br>21359_<br>x592 | CM0006<br>63.2/757<br>87072-<br>7578715<br>0 | 14 | ##### | 28.2 | 592 | GGTCAATGATGAGTTGGCATGTATTCTGAATCTAAAGTTGATTATTACTACTTT<br>AGCTCTAGAATTACTCTGAGACCTG                                                               |
| co3_57<br>49504_<br>x581 | AJ54332<br>5.1/2-85                          | 28 | ##### | 56   | 581 | CUGAGUCCAUGAUGAUUUCAAGUUAUCCUGUCUGAAGGCAAAGAAAGGCC<br>UUUCUGUGUGAAUUUGAAUAUCUGAAACUCAG                                                            |
| co3_57<br>77102_<br>x571 | AC01876<br>1.6/4839<br>1-48315               | 26 | ##### | 52   | 571 | GGCCUCAAGUGAUGGAGAGCAAUACCCGGGGAUGACUGUGACCACAUUGG<br>GAUGUAUUCGUACUGUCUGAUGGGGCC                                                                 |
| co3_58<br>33308_<br>x552 | AJ60943<br>0.1/1-139                         | 30 | 4E-12 | 60   | 552 | GACCUCCUGGGAUCGCAUCUGGAGAGUGCCUAGUAUUCUGCCAGCUUCGG<br>AAAGGGAGGGAAAGCAAGCCUGGCAGAGGCACCCAUUCCAUUCAGCUU<br>GCUCCGUAGCUGGCGAUUGGAAGACACUCUGCGACAGUG |
| co3_59<br>22158_<br>x519 | CM0006<br>68.2/121<br>443617-<br>1214436     | 29 | ##### | 50.1 | 519 | AAGACTATACTTTTCAGGGATCATTCTATAGTTTGTACTAGAAATGTAATAAA<br>CTTAGTGATGAATTACTATAAGC                                                                  |

|                          |                                                |    |       |      |     |                                                                                                                                                        |
|--------------------------|------------------------------------------------|----|-------|------|-----|--------------------------------------------------------------------------------------------------------------------------------------------------------|
| co3_60<br>17443_<br>x490 | ENST00<br>0003649<br>21.1                      | 19 | ##### | 30.2 | 490 | ATGCAGGTACTGTTATAACTGAAGTGTTTTACGGTTTTTTCTTCCTGCTTAAAG<br>CACTTG                                                                                       |
| co3_60<br>51763_<br>x477 | ENST00<br>0006295<br>36.1                      | 26 | ##### | 52   | 477 | AAGCACTGCCTTTGAACCTGATGTGTCTTGTGTTGTAGCTTCACGGGCCAAGCA<br>ACAGTGC                                                                                      |
| co3_61<br>78992_<br>x433 | AK30322<br>2.1/647-<br>788                     | 21 | ##### | 42.1 | 433 | GCUCUGUGAUGGAGCCCAUGCGUGUCAUCUGAGCCUCUGGCUUCCCUGCC<br>AGUGCAGCCCUGGCAGUGUCCUACUUCCCAGGGCUGUUGUCUGCCUGGC<br>GGGAAGGUCCUGGGCAAAGGAUCAGUCUUUGUACUCUGAGAGC |
| co3_62<br>72551_<br>x407 | CM0006<br>65.2/185<br>442219-<br>1854423<br>19 | 15 | ##### | 30.2 | 407 | ATTCTTTTGTGATTCATAAGCATGACTGGGTGTTCCCACTCACGGGTGAGATG<br>TGCCTCCCTCCAACCTTGTTACGACGTCAACACATTACCTGTCTGACA                                              |
| co3_63<br>76397_<br>x375 | AB06182<br>0.1/2178-<br>2249                   | 21 | ##### | 42.1 | 375 | CAGUAGUGAUGAAAUCCACUUCAUUGGUCCGUGUUUCUGAACCACAUGAU<br>UUUCUCGGAUGUUCUGAUGCU                                                                            |

|                          |                                              |    |       |      |     |                                                                                                                                                                                                                         |
|--------------------------|----------------------------------------------|----|-------|------|-----|-------------------------------------------------------------------------------------------------------------------------------------------------------------------------------------------------------------------------|
| co3_63<br>92775_<br>x369 | CM0006<br>63.2/285<br>08559-<br>2850876<br>2 | 24 | ##### | 48.1 | 369 | CCAACGTGGATACCCTGGGAGGTCACTCTCCCCAGGCTCTGTCCAAGTGGCA<br>TAGGGGAGCTTAGGGCTCTGCCCCATGATGTACAGTCCCTTTCCACAACGTT<br>GAAGATGAAGCTGGGCCTCGTGTCTGCGCCTGCATATTCCTACAGCTTCCA<br>GAGTCCTGTGGACAATGACTGGGGAGACAAACCATGCAGGAAACATAT |
| co3_64<br>12609_<br>x365 | AK09614<br>7.1/739-<br>811                   | 20 | ##### | 40.1 | 365 | GUUUGAAUGAUGACUUUAAUUGUCGGAUACCCCUUCACUCCUUUUAUGAG<br>UGAAACAUAAGAGUCUGACAAAC                                                                                                                                           |
| co3_64<br>94947_<br>x344 | CM0006<br>74.2/566<br>43750-<br>5664368<br>0 | 24 | ##### | 48.1 | 344 | CCTCACTGATGAGTACGTTCTGACTTTCGTTCTTCTGAGTTTGCTGAAGCCAG<br>ATGCAATTTCTGAGAAGG                                                                                                                                             |
| co3_65<br>06924_<br>x340 | CM0006<br>65.2/988<br>72180-<br>9887208<br>3 | 19 | ##### | 30.2 | 340 | AAGACTATACTTTTCAGAGATCACTTCTGTAGTTTATTATTAGAAAGTTTCTCTG<br>AATGTGTAGAACACTGGAAAAATGATCTAAGACTACTGTGAAT                                                                                                                  |
| co3_65<br>21144_<br>x336 | ENST00<br>0003913<br>08.2                    | 18 | ##### | 28.2 | 336 | AAGACTATACTTTTCAGGGATTATTTTCAGATAAACTTCTAGAGTTTCTCTGAACC<br>TGTAGA                                                                                                                                                      |
| co3_65<br>32530_<br>x333 | ENST00<br>0003630<br>64.1                    | 49 | ##### | 65.9 | 333 | GAAAATACATGATGATCTCACTCCAACCTGGAACCTCTCTCACTGATTACTTGATA<br>ACAATA                                                                                                                                                      |

|                          |                                                |    |       |      |     |                                                                                                                                                    |
|--------------------------|------------------------------------------------|----|-------|------|-----|----------------------------------------------------------------------------------------------------------------------------------------------------|
| co3_65<br>53032_<br>x328 | CM0006<br>85.2/119<br>787484-<br>1197873<br>53 | 23 | ##### | 46.1 | 328 | AAAGCAGGTTGCAATTACAGTGCTTCATTTTGTGGAAGTACTGCCATTATCCT<br>GCTGAAAGAAAAGCCGTGTTAATCATTTTTGATTTTGCCTTTATGAGGGTAAAA<br>TCATGACAGATTGACATGGACAATT       |
| co3_66<br>17765_<br>x313 | AY34959<br>3.1/1-137                           | 30 | ##### | 60   | 313 | CAGGCUGUGAUGAUUGGCGCAGGGGUACGGACCUCAGCUGAGUCAUGGGA<br>GCUGAAUGUAUGUGUUUCUCCUUUGUCCUGCAUGUGGCAGGCUGAUGGG<br>GAGCACUUACAUGAGACUGUUGCCUCAAUUCUGAGCCUG |
| co3_66<br>31786_<br>x310 | AJ01066<br>6.1/3-73                            | 20 | ##### | 40.1 | 310 | AGCACAAAUGAUGAAUAACAAAGGGACUUAUACUGAAACCAGAUGUUACA<br>UUGUAGUGUGCUGAUGUGCU                                                                         |
| co3_66<br>65387_<br>x301 | CM0006<br>63.2/447<br>76490-<br>4477659<br>3   | 26 | ##### | 52   | 301 | AAGTAGGGTGATGAAAAAGAATCCTTAGGCCGTGGTTGTGGCCGTCTTGGTCA<br>CCTGTGTGCCACTTGCCAATGCAAGGACTTGTGCATAGTTACACTGACTGTTG                                     |
| co3_66<br>78235_<br>x297 | ENST00<br>0003637<br>53.1                      | 18 | ##### | 36.2 | 297 | CAGTAGTGATGAAATTCCACTTCATTGGTCCGTGTTTCTGAACCACATGATTTT<br>CTCGGA                                                                                   |
| co3_67<br>71615_<br>x276 | AC10406<br>6.3/5105<br>5-51176                 | 25 | ##### | 50.1 | 276 | GUGCCCUUUUAAGGUUGACCCAGUGCUUUUAAGAGGCUAACACAGAAGGGU<br>AAAGUAAGUCUCCAUAAAACCCAGAGAAGAGACUGGAAAGCUCUCCUUUGG<br>AUCCUGUCUGGAGUCACAACU                |

|                          |                                |    |       |      |     |                                                                                                                                                  |
|--------------------------|--------------------------------|----|-------|------|-----|--------------------------------------------------------------------------------------------------------------------------------------------------|
| co3_68<br>20038_<br>x265 | ENST00<br>0004084<br>93.2      | 23 | ##### | 46.1 | 265 | ACCTTCTTGTATAAGCACTGTGCTAAAATTGCAGACACTAGGACCATGTCTTG<br>GTTTTTG                                                                                 |
| co3_68<br>58134_<br>x257 | AJ60945<br>0.1/1-137           | 29 | ##### | 58   | 257 | GGGCAUACUCGUAGACCUUGCCUGACUGUGCUCAUGUCCAGGCAGGGGGG<br>ACAGUGUAUGCAAGAAUAAUUUGGAGUUCUGCCAGCUCUAACCAGCUUCA<br>UCAGUGGCUGGAUAAAUUGCAGGACUCUAAACAUUU |
| co3_68<br>71168_<br>x254 | AB06182<br>0.1/4174-<br>4242   | 35 | ##### | 69.9 | 254 | UUGUUUGAUGAGAUUCCACUUAAGGUCCGUGUUUCUGAAACAAAUGAUUU<br>UGUGGAAGUUCUGAUUUU                                                                         |
| co3_68<br>76996_<br>x253 | AY34960<br>4.1/4-89            | 41 | ##### | 81.8 | 253 | UCUGGCAAUGAUGACCCACUUGCCCUCACUGAGAACAAGUUCGGUAAUGA<br>GAAUCUUUGUUAAUGGACUCAAGUUCUGAGCCAGC                                                        |
| co3_68<br>78261_<br>x253 | AL04984<br>0.8/4945<br>7-49533 | 15 | ##### | 30.2 | 253 | AUUGUUACAUGAUAAAAUCAAAUCACCAUCUUUUAGCUAAGCUUGUGCUG<br>GAUUUGCUUUUUUCUGAUAAAGAUG                                                                  |

|                          |                      |    |       |    |     |                                                                                                                                                                                                                                                                                                                                                                                                                                                                 |
|--------------------------|----------------------|----|-------|----|-----|-----------------------------------------------------------------------------------------------------------------------------------------------------------------------------------------------------------------------------------------------------------------------------------------------------------------------------------------------------------------------------------------------------------------------------------------------------------------|
| co3_69<br>20620_<br>x243 | BK00556<br>8.1/1-420 | 28 | ##### | 56 | 243 | GUUUUAGGGAGGGAGAGCGGCCUGGGUCCUGGGUGUUGUGUGCGGAGCU<br>GUGGCGUCGCGUGUGAGGCGCGUGCAGGGUGAGUGUGAGUGGACGCGUG<br>AGUGUGUGAGUGUGCGCGCUUGGAGCGUGUUAGGCGAGUGCGUGCGCCC<br>ACCCUGCGCCCCUCCUCCCGCUUACACUUUGAUCUUUUUGAUCGGAUC<br>GUGACCCAGCCCCGCCGGGCCACCCGAAAUGAAAAGCUCUCCUCCUGC<br>GAAGCCCCUCGGGGCGCUGUGCAGCGAGGCCCCUUAGGCGGCGGCCAC<br>GCUGUGGUCCCCGAGGUCCCGGAGCUGGCCUUGCGGGGCCCGGCGCUCA<br>GAAGUGAUGAAUUGAUCAGAUAGACGAGGCCGGGCUUGUCCCCGGCCACU<br>GAUUAUCGAGGCGAUUCUGAUCUGG |
|--------------------------|----------------------|----|-------|----|-----|-----------------------------------------------------------------------------------------------------------------------------------------------------------------------------------------------------------------------------------------------------------------------------------------------------------------------------------------------------------------------------------------------------------------------------------------------------------------|

|                          |                                              |    |       |      |     |                                                                                |
|--------------------------|----------------------------------------------|----|-------|------|-----|--------------------------------------------------------------------------------|
| co3_69<br>56354_<br>x236 | CM0006<br>68.2/856<br>77368-<br>8567729<br>4 | 25 | ##### | 50.1 | 236 | TATCTGTGATGATCTTATCCCGAACCTGAACTTCTGTTGAAAAAAAAAACTTT<br>TACGGATCTGGCTTCTGAGAT |
|--------------------------|----------------------------------------------|----|-------|------|-----|--------------------------------------------------------------------------------|

|                          |                           |    |       |      |     |                                                                  |
|--------------------------|---------------------------|----|-------|------|-----|------------------------------------------------------------------|
| co3_69<br>84369_<br>x231 | ENST00<br>0003639<br>81.1 | 21 | ##### | 42.1 | 231 | ACTCCATGATGAACACAAAATGACAAGCATATGGCTGAACTTTCAAGTGATGT<br>CATCTTA |
|--------------------------|---------------------------|----|-------|------|-----|------------------------------------------------------------------|

|                          |                           |    |       |      |     |                                                                  |
|--------------------------|---------------------------|----|-------|------|-----|------------------------------------------------------------------|
| co3_70<br>24787_<br>x223 | ENST00<br>0003910<br>79.1 | 14 | ##### | 28.2 | 223 | AAATGATGAAATCACCCAAAATAGCTGGAATTACCGGCAGATTGTGTAGTGGT<br>GAACCTA |
|--------------------------|---------------------------|----|-------|------|-----|------------------------------------------------------------------|

|                          |                                        |    |       |      |     |                                                                                                                                                 |
|--------------------------|----------------------------------------|----|-------|------|-----|-------------------------------------------------------------------------------------------------------------------------------------------------|
| co3_70<br>27683_<br>x222 | ENST00<br>0003649<br>38.1              | 43 | ##### | 85.7 | 222 | CCAACGTGGATACACCCGGGAGGTCCTCTCCCCGGGCTCTGTCCAAGTGG<br>CGTAGGGGA                                                                                 |
| co3_70<br>43145_<br>x219 | AADC01<br>102901.1<br>/15489-<br>15356 | 19 | ##### | 38.2 | 219 | CUGUCAGGUGGGAUAAACCCUUCCUGUUCUCCGUUUGGAGGGCAGAUAG<br>AACAUGAUGACUGGAGAUGCAUGAAAUGUGACUAAUGUCUCUGUGUAAUCA<br>GGACUUGCAACACCCUGAUUGCUCUCCUAUCUGAU |
| co3_70<br>87608_<br>x210 | AC09348<br>4.2/1602<br>94-<br>160365   | 23 | ##### | 46.1 | 210 | UGUCCUGAUGAUACUUGUAAUAGGAAGUGCCGUCAGAAGCGAUAAACUGAC<br>GACGUCUAAUGUCUAUCUGACC                                                                   |
| co3_71<br>05529_<br>x207 | AF14134<br>6.1/1052-<br>1111           | 38 | 1E-16 | 75.8 | 207 | AGCCUGUGAUGCUIIUAAAGAGUAGUGGACAGAAGGGAUUUCUGAAAUUCUA<br>UUCUGAGGCU                                                                              |
| co3_71<br>59131_<br>x197 | ENST00<br>0004591<br>63.1              | 51 | 1E-19 | 85.7 | 197 | AAGTCAAATGATGGCAATCATCTTTTCGGGACTGACCTGAAATGAAGAGAATAC<br>TCATTGC                                                                               |
| co3_71<br>77660_<br>x193 | L44140.1<br>/70716-<br>70850           | 43 | ##### | 85.7 | 193 | CCGACGCCAAUUAAGCCGACUGAGUUCUUCUCCUCAUGGGGACCCAGUGU<br>GCGAUGGCUGCACACAGCAGCUUCCUUGGUAGUGUACGCAGCCUGUUGGU<br>UGUAUGGGUUGCUCUAAGGGACCUUGGAGACAGGC |

|                          |                                                |    |       |      |     |                                                                                                                                                                                                                                            |
|--------------------------|------------------------------------------------|----|-------|------|-----|--------------------------------------------------------------------------------------------------------------------------------------------------------------------------------------------------------------------------------------------|
| co3_72<br>20697_<br>x186 | CM0006<br>63.2/116<br>278606-<br>1162788<br>21 | 22 | ##### | 36.2 | 186 | AAGACTATACTTTTCAGGGATCATTTATATGATTTGTGGCTACAGAAGTTTCTCA<br>GCGTGAGGAGCCCCAGAAACCATGAGGAGGAGACGCAGCATTCTCTGTGGC<br>GCGTGAGGCCAGCTCTTGGTTTTACTTCGCTACAACCTGCATTTGCCATTGGTG<br>ATCGTTCTTCTCTCATCTCAGGGAGAGTAGAAGGGAGAGAAGATGCAGCCTG<br>AGTGAT |
| co3_72<br>34765_<br>x184 | ENST00<br>0006259<br>43.1                      | 23 | ##### | 46.1 | 184 | TCTCAGTGATGAAAACCTTTGTCCAGTTCTGCTACTGACAGTAAGTGAAGATAA<br>AGTGTGT                                                                                                                                                                          |
| co3_72<br>38261_<br>x184 | ENST00<br>0003842<br>29.1                      | 51 | ##### | 46.1 | 184 | TGCTCTGATGAAATCACTAATAGGAAGTGCCGTCAGAAGCGATAACTGACGA<br>AGACTACT                                                                                                                                                                           |
| co3_72<br>42291_<br>x183 | ENST00<br>0004080<br>61.1                      | 31 | ##### | 61.9 | 183 | GGGCTCCCATGATGTCCAGCACTGGGCTCTGATCACCCCTGAGGACACAGT<br>GCACCCAG                                                                                                                                                                            |
| co3_72<br>85684_<br>x176 | ENST00<br>0003842<br>14.1                      | 32 | ##### | 63.9 | 176 | CTTCGATGAAGAGATGATGACGAGTCTGACTTGGGGATGTTCTCTTTGCCCA<br>GGTGGCCT                                                                                                                                                                           |
| co3_72<br>94957_<br>x174 | CM0006<br>82.2/417<br>12600-<br>4171247<br>9   | 23 | ##### | 30.2 | 174 | GTGTCCTTTTAAGGTTGACACAGTGCTTTAAGAGCCTAACACAGAAAGGTAAA<br>GTAAGTTTCCGTAAAACCCAGAAATGATATTGCAAAATTCCTCTTTGAATCATG<br>TCTGGAGTCACAGCT                                                                                                         |
| co3_72<br>97045_<br>x174 | AC00844<br>3.10/639<br>18-63851                | 28 | ##### | 56   | 174 | GGGGCGGUGAUGACCCCAACAUGCCAUCUGAGUGUCGGUGCUGAAAUCCA<br>GAGGCUGUUUCUGAGCUG                                                                                                                                                                   |

|                          |                                                |    |       |      |     |                                                                                                                                                |
|--------------------------|------------------------------------------------|----|-------|------|-----|------------------------------------------------------------------------------------------------------------------------------------------------|
| co3_73<br>22653_<br>x169 | ENST00<br>0004593<br>42.1                      | 24 | ##### | 48.1 | 169 | G TTCAGATGATGAATTTAACTGTTCAACTGCTGAATGATAACGGGCATGAACT<br>AAA ACTT                                                                             |
| co3_73<br>32773_<br>x168 | AC00706<br>6.4/1645<br>16-<br>164622           | 25 | ##### | 50.1 | 168 | AAGUUUUCUAAGUGUCUAAUGAUGAAUUUCAUAGGGCAGAUUCUGAGGUG<br>AAAAUUUAAUUCACUGAUACUCCUACUGUGGAAUCUGAAGACACUUGA<br>AAACGU                               |
| co3_73<br>44163_<br>x167 | CM0006<br>74.2/103<br>592112-<br>1035922<br>43 | 19 | ##### | 30.2 | 167 | T CATCAGATGGGATAACTTTTACCTGTTCCCTCTTTTGGAGGTTAGATTCTAAT<br>ACGATGATTGAAGTTTCGTATGATACGTGATTAATGTCTCTGCATAATCAGGAC<br>TTGTAACACCTTGATTGCTTCTGAT |
| co3_73<br>61860_<br>x164 | ENST00<br>0003840<br>27.1                      | 37 | ##### | 58   | 164 | G TTTGAATGATGACTTTAATTGTCGGATACCCCTTCACTCCTTTTATGAGTGAA<br>ACATAA                                                                              |
| co3_73<br>76969_<br>x161 | CM0006<br>72.2/687<br>55172-<br>6875523<br>8   | 26 | ##### | 52   | 161 | G AGTTATGATGTGTGTAAATCCTATTCCATTGCTGAAATGCAGTGTGGAACAC<br>AATGAACTGAACTC                                                                       |
| co3_73<br>95189_<br>x158 | ENST00<br>0003841<br>47.1                      | 35 | ##### | 69.9 | 158 | C TACGGGGATGATTTTACGAACTGAACTCTCTCTTTCTGATGGATTAGTGGAG<br>AAAACAG                                                                              |
| co3_74<br>17108_<br>x155 | ENST00<br>0003632<br>14.1                      | 41 | ##### | 65.9 | 155 | T GATGACATTCTCCGGAATCGCTGTACGGCCTTGATGAAAGCACATTTGAACC<br>CTTTTCC                                                                              |

|                          |                                 |    |       |      |     |                                                                                                                                                                                                                                                                                                                                                                     |
|--------------------------|---------------------------------|----|-------|------|-----|---------------------------------------------------------------------------------------------------------------------------------------------------------------------------------------------------------------------------------------------------------------------------------------------------------------------------------------------------------------------|
| co3_74<br>30475_<br>x153 | AC01328<br>3.23/462<br>45-46493 | 38 | ##### | 75.8 | 153 | AACAUGC <u>U</u> CCU <u>U</u> AGA <u>U</u> CCACCU <u>U</u> UGUGGAUGAAUCUUGAACUGAGU <u>U</u> CCA<br>CUUGUAAACUUCUUGUUUCUUGUGGU <u>U</u> CCAGUAGUCAAAAGAAACA <u>U</u> CCAGC<br>AACUUUUUUGGUUGUAUAGUCAAAAGGUGCUUGAGUCAUUGGCAUGUAAGA<br>GAAAU <u>U</u> ACCUGCAUGUUAGUCUAACGUUCUGAUAGAA <u>U</u> GACAUGCAUUU<br>AUGCUGCCA <u>U</u> UUUGUUACUAUCAGGACUCGACUCGUGUGCGGACAUU |
| co3_74<br>43214_<br>x151 | AC00643<br>5.7/3490-<br>3399    | 32 | ##### | 63.9 | 151 | UAGAGAAGUCA <u>U</u> GAUGGUUUU <u>U</u> AU <u>U</u> CAU <u>U</u> ACGUCUGAACCU <u>U</u> GUCUGAAGCA<br>UCUCAGUGAUGCAAUCUCUGUGUGGUUCUGAGACUUCUCCA                                                                                                                                                                                                                      |
| co3_74<br>48471_<br>x150 | ENST00<br>0006072<br>46.1       | 19 | ##### | 30.2 | 150 | ATTCATTTTCAAATATTTGCTGACTAAATGATACACACATGACTAAA <u>U</u> ACTTAATC<br>CTGAC                                                                                                                                                                                                                                                                                          |
| co3_74<br>50121_<br>x150 | AC00659<br>7.2/8154-<br>8065    | 14 | ##### | 28.2 | 150 | UCACUGUGAUGAUGGUUUUCCAACA <u>U</u> UCGCAGUUUCCACCAGAAAGGUUU<br>UCCUUAGUGUUGGGUAAACCU <u>U</u> CCUUGGAUGUCUGAGUGA                                                                                                                                                                                                                                                    |
| co3_74<br>85294_<br>x144 | ENST00<br>0003847<br>69.1       | 33 | ##### | 50.1 | 144 | AGCTTAATGATGACTGTTTTTTTTGATTGCTTGAAGCAATGTGAAAAACACATT<br>TCACCG                                                                                                                                                                                                                                                                                                    |
| co3_74<br>92741_<br>x142 | AC01876<br>1.6/5123<br>7-51168  | 18 | ##### | 28.2 | 142 | UGGGAAGUGAUGACACCUGUGACUGUUGAUGUGGAACUGAUUU <u>U</u> AUCGCGU<br>AUUCGUACUGGCUGAUCCUG                                                                                                                                                                                                                                                                                |

|                   |                                                |    |       |      |     |                                                                                               |
|-------------------|------------------------------------------------|----|-------|------|-----|-----------------------------------------------------------------------------------------------|
| co3_75_00969_x141 | CM0006<br>68.2/132<br>816802-<br>1328168<br>77 | 28 | ##### | 56   | 141 | GCTGTACATGATGACAACTGGCTCCCTCTACTGAACTGCCATGAGGAACTG<br>CCATGTCACCCTTCTGATTACAGC               |
| co3_75_30425_x137 | ENST00<br>0003638<br>36.1                      | 14 | ##### | 28.2 | 137 | GGTCAATGATGTAATGGCATGTATTAGCTGAATCCAGAGTTGATATGAGTTCT<br>AAAATTA                              |
| co3_75_72074_x131 | ENST00<br>0003838<br>75.1                      | 46 | ##### | 83.8 | 131 | CTGCAGTGATGACTTTCTTAGGACACCTTTGGATTTACCGTGAAAATTAATAAA<br>TTCTGA                              |
| co3_75_87083_x130 | CM0006<br>68.2/318<br>35263-<br>3183532<br>6   | 37 | ##### | 73.8 | 130 | AGTGATGATGACCCAGGTA ACTCTTGAGTGTGTGCTGATGCCATCACCGC<br>AGCGCTCTGACC                           |
| co3_75_90831_x129 | D88010.<br>1/2919-<br>3009                     | 18 | ##### | 36.2 | 129 | UCACUAUGAUGAUUGGUUGCCAGACAUUCGCAGUUUCCACCAGAAAUGUUU<br>UUCUUAUGUUGGCCAGUUCUUCUUGGAUGUCUGAGUGA |
| co3_76_35999_x123 | ENST00<br>0005164<br>04.1                      | 19 | ##### | 38.2 | 123 | TCCAGCTGTAGGCAGCTGCCTAGGTTGTCTTGTACCTAGGCAAGTGTTACAC<br>TGCTGGGA                              |
| co3_76_39197_x123 | ENST00<br>0003634<br>84.1                      | 20 | ##### | 40.1 | 123 | ACCTGTATTCGAAAGTGATCGTGGGCTGCCTGTGCCCTGGTCATTGATAGTG<br>CAGGGAGA                              |
| co3_76_89802_x116 | AC01036<br>1.3/2393<br>2-23994                 | 26 | ##### | 52   | 116 | GUGCAUGUGAUGAAGCAAUCAGUAUGAAUGAAUUCAUGAUACUGUAAACG<br>CUUUCUGAUGUA                            |
| co3_77_51177_x109 | ENST00<br>0003845<br>84.1                      | 29 | ##### | 58   | 109 | CAGCATGTTTCCAAGGGCTGTGGCTGGTCATAGCCATGGGATCTCCA ACTGC<br>ATGCAAGA                             |

|                          |                                                |    |       |      |     |                                                                                                                                                  |
|--------------------------|------------------------------------------------|----|-------|------|-----|--------------------------------------------------------------------------------------------------------------------------------------------------|
| co3_77<br>55934_<br>x108 | CM0006<br>70.2/206<br>14926-<br>2061483<br>3   | 27 | ##### | 30.2 | 108 | AAGACTATACTTTTCAGGGATCATTCCCTATAGTTCATCATTAGAGAAGTTCTCTG<br>AACATGTAGAGCACCGAGACAAGAAATAACTAAGATCAGA                                             |
| co3_77<br>67930_<br>x106 | CM0006<br>64.2/289<br>27983-<br>2892806<br>0   | 26 | ##### | 52   | 106 | TTGCTGTGATGACTATCATTGGGTTTCGCATGTTGCTGAGTTCCAGTGATGCC<br>TCTTTTCTCTTGGCTGTCTGAGCAA                                                               |
| co3_77<br>96258_<br>x103 | ENST00<br>0003648<br>84.1                      | 25 | 8E-09 | 50.1 | 103 | GGGAATGATGATTTTCACAGACTAGAGTCTCCGATGCTGGTCATGATGTCAAAA<br>CTAAGTT                                                                                |
| co3_77<br>99851_<br>x102 | CM0006<br>65.2/154<br>007502-<br>1540073<br>67 | 22 | ##### | 28.2 | 102 | TCGTCAGGTGGGAGAATTCTTACATGTTCCCTCTTTTGAAGGCAGATTAGAA<br>CATGATGATTGGGGTTCGCATAATATGTGATTAACGTTTCTGTGTAATCAGGA<br>CTTGCAACATCCC GAATGCCCTTACCTGAC |
| co3_78<br>18441_<br>x100 | ENST00<br>0004083<br>76.1                      | 20 | ##### | 40.1 | 100 | TGATGACTGTTCTTCTGTTGCCTTCAGACCTGGCATTAGGATTTTAGGTCAT<br>CATAAAT                                                                                  |
| co3_78<br>51658_<br>x96  | CM0006<br>67.2/580<br>70188-<br>5807029<br>1   | 17 | ##### | 34.2 | 96  | ATCCTTTTGTAGTTTACGAGCATGATGATTGAGTGTTCCACACACGGATGTGAT<br>ATGTGCCACCCTCAAACCTTGTTACGACTTCAGCTTATTACCCAACCTGACC                                   |
| co3_78<br>62259_<br>x95  | CM0006<br>63.2/193<br>731940-<br>1937318<br>59 | 18 | 0.009 | 28.2 | 95  | AGCGTGAAGCTGGCTCTTGGTGCTCCTTCACTGAAAATGCCATTTGCCATTGA<br>TGATCGCTCTTCCCTTCTCTGGGAGGAT                                                            |

|                         |                                                |    |        |      |    |                                                                                                                                                 |
|-------------------------|------------------------------------------------|----|--------|------|----|-------------------------------------------------------------------------------------------------------------------------------------------------|
| co3_78<br>92782_<br>x91 | AJ60946<br>5.1/1-134                           | 34 | #####  | 67.9 | 91 | UGGUA AUGGAUUUAUGGUGGGUCCUUCUCUGUGGGCCUCUCAUAGUGUAC<br>CCAUGCCAUAJGCAAUUGGCAGCCUCGAACCAUUGCCCAGUCCCCUACCUG<br>UGGGCUGUGAGCACUGAAGGGGGUUGCACAGUG |
| co3_78<br>94238_<br>x91 | ENST00<br>0004085<br>64.2                      | 21 | 5E-07  | 42.1 | 91 | GTGGCCCTGACTGAAGACCAGCAGTTGTA CTGTGGCTGTTGGTTTTCAAGCAG<br>AGGCCTAA                                                                              |
| co3_79<br>03132_<br>x90 | ENST00<br>0005162<br>36.1                      | 16 | #####  | 32.2 | 90 | ATGGAGGCTGCAGTGAGCAGAGATGGCGCCACTGCACTCCAGCCTGAGCGA<br>CAACGAGAC                                                                                |
| co3_79<br>06192_<br>x90 | CM0006<br>71.2/381<br>47428-<br>3814756<br>1   | 35 | #####  | 38.2 | 90 | TCGATGGGTGGGATAATCCTTACCTGTTCTCGTTTTGGAGGGCAGATAGAA<br>CATGATGATTGGAGATGCATGAAATGTGATTAATGCCTCTGCCTAATCAGGAC<br>TTGCAACACCCTGAGTACTCCTCTCTGAT   |
| co3_79<br>06462_<br>x90 | CM0006<br>67.2/140<br>527428-<br>1405273<br>52 | 20 | 0.0009 | 32.2 | 90 | GGTCAATGATGAGCTGACATGTATTCTGAATCTAAAGTTGATTATTAGTACTTT<br>AGTTCTAGAATTACTGAGACATG                                                               |
| co3_79<br>10692_<br>x90 | ENST00<br>0003841<br>76.1                      | 24 | #####  | 48.1 | 90 | CTCCATGTATCTTTGGGACCTGTCAAGTGTGGCAGTCTCCCTTCTTGCCATG<br>GAAGAGC                                                                                 |
| co3_79<br>11497_<br>x89 | CM0006<br>63.2/309<br>68236-<br>3096816<br>4   | 27 | #####  | 54   | 89 | ACTGGCAAGGATGATACACACTTGCCCTCACTTAGACTATAGTTCACTGATGA<br>GAGCATTGTTCTGAGCCAGT                                                                   |

|                         |                                              |    |       |      |    |                                                                                                                                                                                                                                         |
|-------------------------|----------------------------------------------|----|-------|------|----|-----------------------------------------------------------------------------------------------------------------------------------------------------------------------------------------------------------------------------------------|
| co3_79<br>25679_<br>x88 | ENST00<br>0003845<br>81.1                    | 36 | ##### | 71.9 | 88 | ATCCTCCTGATCCCTTTCCCATCGGATCTGAACACTGGTCTTGGTGGTCGTAA<br>AAGGAGG                                                                                                                                                                        |
| co3_79<br>33133_<br>x87 | ENST00<br>0003839<br>03.1                    | 20 | 2E-06 | 40.1 | 87 | AGTCTGTGATGAATTGCTTTGACTTCTGACACCTCGTATGAAAACCTGCACGTG<br>CAGTCTG                                                                                                                                                                       |
| co3_79<br>42071_<br>x86 | CM0006<br>83.2/291<br>80639-<br>2918042<br>5 | 23 | ##### | 30.2 | 86 | AAGACGACGCTTGCAGGGATTGTTTCTATAGCTCACTACCAGATAAGTTTCTC<br>CGAACATGTAGAGCACCCAGAAACCACATGCAGCGGTGCAGCGCTCTCTCGG<br>GAGCCTGACACTGGCTCTGGGTGCTGCTTCACTGCAACTTCCATTTGCCATT<br>GAGAACTGTTCCGCTCTTCCTCTGGGAAAGTAAGAGAGAGAGGGTGCATCT<br>GAGGGGT |
| co3_79<br>70021_<br>x83 | ENST00<br>0003843<br>04.1                    | 15 | ##### | 30.2 | 83 | CCTTCTATGATGATTTTATCAAATGACTTTCGTTCTTCTGAGTTTGCTGAAGC<br>CACATT                                                                                                                                                                         |
| co3_79<br>80835_<br>x82 | AF01961<br>8.1/48-<br>114                    | 21 | ##### | 42.1 | 82 | GGAUUUGUGAUGAGCUGUGUUUACUGAGCAUGAUGAAGUAAAGCUCAACG<br>UGAUUACUCUGAAGUCC                                                                                                                                                                 |
| co3_79<br>88024_<br>x81 | AJ60948<br>6.1/1-187                         | 26 | ##### | 52   | 81 | ACGGUCUGGGGAAAGGCUCCUGUGUUGUUGAGCCUGCCAAGUUGUGGGU<br>GCAGCAUGGUACCAGGCAGCCCAACCCUGACCUGAAAGUAAAUCCCGGAAG<br>AAGUCUUUCCUGGGUUUUGAAUUUGCAGUAACAGGUGUGAGCAUUCUAGC<br>AGCAGUUUGAUGAUCAUGUAUGAUACUGCAAACAGGA                                 |

|                         |                                              |    |       |      |    |                                                                                                                                                    |
|-------------------------|----------------------------------------------|----|-------|------|----|----------------------------------------------------------------------------------------------------------------------------------------------------|
| co3_80<br>20434_<br>x78 | ENST00<br>0004590<br>04.1                    | 23 | ##### | 46.1 | 78 | TTGCATGTGAAATGTCTGCTTCTCATTCCCTTGGGAGCAGGAATATGTTTCATA<br>ACATGCT                                                                                  |
| co3_80<br>21604_<br>x78 | ENST00<br>0003655<br>30.1                    | 36 | 3E-08 | 48.1 | 78 | AGCACAAATGATGAATAACAAAGGGACTTAATACTGAAACCTGATGTTACATT<br>GTAGTGT                                                                                   |
| co3_80<br>34210_<br>x77 | AL12180<br>9.6/1720<br>81-<br>172016         | 19 | ##### | 38.2 | 77 | CUGUGAUGAUGGCAUUUCUUAGGACAAUUUUGGAUUAAUUUAUGAAAACAAC<br>UACUCUCUGAGCAAU                                                                            |
| co3_80<br>35827_<br>x77 | CM0006<br>68.2/241<br>66273-<br>2416637<br>4 | 19 | ##### | 30.2 | 77 | CTCGAGGGTGATGAAAAAGCATCCCTAGGTGTGGTTGTGGCATCTTGGTCAC<br>CTATGTGCCACCTGCCAGTGCAAGGATTTGTCATAGTTATAGTGACCGTG                                         |
| co3_80<br>37591_<br>x76 | ENST00<br>0003845<br>83.1                    | 43 | ##### | 85.7 | 76 | TTGGCCCTGAATCAAGGCCAGCAGTTTGCTGAAGCTGTTGGTTTCAAGCAGG<br>AGCCTAAA                                                                                   |
| co3_80<br>45799_<br>x76 | AP00057<br>7.5/6961<br>2-69474               | 23 | ##### | 30.2 | 76 | GAGCUUCCAGGAUCACCCCUGCAGAGUGGCUAAUUAUUCUGCCAGCUUCGG<br>AAAGGGAGGGGAAGCAAGCCUGGCAGAGGCACCCAUUCCAUCCAGCUU<br>GCUUAGUAGCUGGCCAUGGGAAGACACUGUGCAACACUG |
| co3_80<br>54380_<br>x75 | CM0006<br>85.2/235<br>07313-<br>2350721<br>1 | 20 | ##### | 40.1 | 75 | ATCCCTTTATAGTTCCCGAGCATGACGATTGGGTGTTACATGCATGTGTGAG<br>ATGTACCACCTCGCATCTTGTTAGACGTTGGCACATTACCCGTCTGACC                                          |

|                         |                                                |    |       |      |    |                                                                                                                                                       |
|-------------------------|------------------------------------------------|----|-------|------|----|-------------------------------------------------------------------------------------------------------------------------------------------------------|
| co3_80<br>76170_<br>x73 | ENST00<br>0006067<br>69.1                      | 17 | ##### | 34.2 | 73 | AAGCAACTCTGTGGCAGATGATCAAACACTGTCTGACACAATTTGAGCTTGC<br>TATAGCA                                                                                       |
| co3_80<br>79236_<br>x73 | ENST00<br>0005162<br>31.1                      | 14 | 0.008 | 28.2 | 73 | TGAGATGAGATCATGCCATTGCACTCCAGCCTGGACGACAGAGCGAGACTTC<br>ATCTCAAA                                                                                      |
| co3_80<br>87971_<br>x72 | ENST00<br>0003868<br>47.1                      | 21 | 5E-07 | 42.1 | 72 | TGTCCCTGACCTGGGTAGAGTGGCATCTGGTTGGTGATGCCCATCTCATATC<br>AGCCAGGG                                                                                      |
| co3_80<br>93898_<br>x71 | CM0006<br>82.2/265<br>4212-<br>2654286         | 27 | 2E-10 | 54   | 71 | TTGCAGTGATGACTTGCGAATCAAATCTGTCAATCCCCTGAGTGCAATCACTG<br>ATGTCTCCATGTCTCTGAGCAA                                                                       |
| co3_81<br>04920_<br>x70 | CM0006<br>63.2/928<br>37289-<br>9283738<br>3   | 28 | ##### | 56   | 70 | GCTGAATGATGATATCCCCTAACTGAGCAGTCAGTAGTTGGTCCTTTGGTTG<br>CATATGATGCGATAATTGTTTCAAGACGGGACTGATGGCAGC                                                    |
| co3_81<br>10030_<br>x70 | CM0006<br>74.2/888<br>66643-<br>8886676<br>3   | 30 | ##### | 36.2 | 70 | TGTCTCTGACCTGGTTAAAGTGGCATCTGGTTGGTGGCACTTATCTCAAATCG<br>CAAAGACATAAGGCAACCTCTTGTTTATCCCAGCTTGGCTTTTTGTTTTTGT<br>TTTTAGACAGGGTC                       |
| co3_81<br>24851_<br>x69 | CM0006<br>63.2/175<br>968540-<br>1759683<br>98 | 31 | ##### | 61.9 | 69 | AATGGAAGCTGCTGGAACCAGCCATGTGGACAAATGAAAAAATGCCTTTTGTG<br>TACAGATTGCAGCGATCCTACATAAATATATGGAGGTCTCTGTCTGGCTTAGG<br>ACAGCTGGCTAAGTCTGATCGTTCCTCCGTACAGC |

|                         |                                              |    |       |      |    |                                                                                                                                                           |
|-------------------------|----------------------------------------------|----|-------|------|----|-----------------------------------------------------------------------------------------------------------------------------------------------------------|
| co3_81<br>33838_<br>x68 | AC02055<br>3.4/1381<br>95-<br>138051         | 41 | ##### | 34.2 | 68 | AAUCUCCUGGGAUUGUGUCUGGCGAGUGCCCAGUAUUCUGCCACCUUCAG<br>AAGGAAGGGAAAGCAAACCUUCAUGAAAGCAGAGGCAUUCAUUCCAUUCCC<br>AGCUUGCUC CAGAUCUGGCAGUUGGAAGACAUCUGCAACAAUG |
| co3_81<br>34314_<br>x68 | ENST00<br>0005165<br>99.1                    | 33 | ##### | 42.1 | 68 | TGTCAGTGATGAAAGCTTAGTCCCGTTCTGCTACTAATGTTAAGTGATGATAA<br>AGTTATG                                                                                          |
| co3_81<br>40390_<br>x67 | CM0006<br>73.2/628<br>55632-<br>6285556<br>4 | 21 | ##### | 42.1 | 67 | CTTCCTATGATGAGGACCTTTTCACAGACCTGTACTGAGCTCCGTGAGGATAA<br>ATAACTCTGAGGAGAT                                                                                 |
| co3_81<br>51870_<br>x66 | ENST00<br>0004587<br>70.1                    | 23 | ##### | 46.1 | 66 | CCACATGCGGCTGATGACAGCACTTCTGCTGAGACGCTGTGATTGCTCTGTC<br>CAAAGTAA                                                                                          |
| co3_81<br>64796_<br>x65 | ENST00<br>0004594<br>33.1                    | 31 | ##### | 61.9 | 65 | GGTTCATGATGACACAGGACCTTGTCTGAACATAATGATTTCAAATTTGAGC<br>TTAAAAA                                                                                           |
| co3_81<br>67461_<br>x65 | ENST00<br>0003846<br>74.1                    | 46 | ##### | 91.7 | 65 | ACTCTCTCGGCTCTGCATAGTTGCACTTGGCTTCACCCGTGTGACTTTCGTAA<br>CGGGGAG                                                                                          |
| co3_81<br>68501_<br>x65 | AC01065<br>3.10/104<br>059-<br>104144        | 29 | ##### | 58   | 65 | UGUGUGUUGGAGGAUGAAAGUACGGAGUGAUCCAUCGGCUAAGUGUCUUG<br>UCACAAUGCUGACACUCAAAACUGCUGACAGCACACG                                                               |
| co3_81<br>73787_<br>x64 | ENST00<br>0003649<br>77.1                    | 21 | ##### | 34.2 | 64 | ACCACCAGTGATGAGTTGAATACTGCCCCAGTCTGATCAACATGCGTGAAAG<br>ATATTTTC                                                                                          |

|                         |                                                |    |       |      |    |                                                                                                                                                   |
|-------------------------|------------------------------------------------|----|-------|------|----|---------------------------------------------------------------------------------------------------------------------------------------------------|
| co3_81<br>78907_<br>x64 | AF14134<br>6.1/3076-<br>3157                   | 48 | ##### | 56   | 64 | CCGAUACAAUGAUGAUACAUAAGUUCAGCAGACUACGCUGAUGAGCAAUA<br>UUAAGUCUUUCGCUCCUAUCUGAUGUAUCUG                                                             |
| co3_81<br>84950_<br>x63 | ENST00<br>0006285<br>90.1                      | 24 | ##### | 48.1 | 63 | ACGCGCTGTCTTTGAGCCCCGCGAGCTTCCTCGTGGCGCCGGGGTCAA<br>TCTGCAGCG                                                                                     |
| co3_81<br>89297_<br>x63 | CM0006<br>72.2/565<br>96031-<br>5659596<br>3   | 27 | ##### | 46.1 | 63 | TGATGAATTGATGACAGTCATCTTTTGGAGAGTGACCCAAAATGAAAAGAATAC<br>TCATTGCTGATCACTT                                                                        |
| co3_81<br>95389_<br>x62 | CM0006<br>63.2/154<br>259727-<br>1542598<br>62 | 27 | ##### | 54   | 62 | GGGCATACCCGTAGACCTTGTCTGACTGTGCTCATGGCCAGGCAGGGGGGA<br>CAGTGTATGCAAGAGTAATGTGGAGTTTGTGCTAACTCTAGCCAGCTTAATTA<br>GTGACTGGATAAATTGCACAACCTCTCACATTC |
| co3_81<br>98799_<br>x62 | CM0006<br>63.2/447<br>75864-<br>4477594<br>3   | 23 | 4E-08 | 46.1 | 62 | CGTGTATGATGACAACCTCGGTAATGCTGCATACTCCCGAGTGCGCGGTGGGG<br>AAGCCAACCTTGGAGAGCTGAGCGTGCG                                                             |
| co3_82<br>00287_<br>x62 | ENST00<br>0005799<br>69.1                      | 29 | 3E-11 | 58   | 62 | ATGCTATGATGACATCCATATGGTTTTGCTGCTGGCTGAGTTTCAGAGATGAC<br>ACCTTTC                                                                                  |
| co3_82<br>01713_<br>x62 | AC00643<br>5.7/2333-<br>2239                   | 15 | ##### | 30.2 | 62 | CUUAAGAGCCAAUGAUGUUUUUAUUCAAAAUGUCUGAACCUGUCUGAAGCA<br>UCCCAGUGAUGCAACUUCUGUGUGAUACUGAGGCUUUUUUGCCA                                               |

|                         |                                              |    |       |      |    |                                                                                                         |
|-------------------------|----------------------------------------------|----|-------|------|----|---------------------------------------------------------------------------------------------------------|
| co3_82<br>11668_<br>x61 | AB01771<br>0.1/1702-<br>1771                 | 24 | ##### | 48.1 | 61 | AAUCAAUGAUGAAACCUAUCCCGAAGCUGAUAACCUGAAGAAAAUAAGUAC<br>GGAUUCGGCUUCUGAGAU                               |
| co3_82<br>15145_<br>x61 | ENST00<br>0003910<br>81.1                    | 19 | ##### | 30.2 | 61 | TGTTCCCGATCTGGTAGAGTAGCATCTGGTTGGTGGTGACCATCTAATACCA<br>GCCAGGGA                                        |
| co3_82<br>19080_<br>x60 | ENST00<br>0003843<br>39.1                    | 26 | ##### | 52   | 60 | CTGCGAATATTCTCGCTGTTCTGATTTTGTAAATAGTCAGGACAGGCTAAACAT<br>TCGCTAT                                       |
| co3_82<br>27540_<br>x60 | CM0006<br>84.2/293<br>33258-<br>2933316<br>3 | 14 | 0.009 | 28.2 | 60 | ACCCCTGGCAGCCCCTCCTGATGATTCTTCTTCTCCTGAGCACGCTCATGATGA<br>GCAAACCTGAGCCTCTAAGAAGTTGACTGAAGGGGCTGCTTCCCC |
| co3_82<br>32884_<br>x59 | ENST00<br>0005166<br>52.1                    | 15 | ##### | 30.2 | 59 | GCTACTCTTGAACCTCCTGACCTCAACTGATCCACCCGCCTCGGCCTCCCAA<br>GTATGAAA                                        |
| co3_82<br>35598_<br>x59 | AC07879<br>7.20/670<br>61-67136              | 27 | ##### | 54   | 59 | UCCUCUGAUGACUCCUGUUAGUGCCACGUGUCUGGGCCACUGAGACAC<br>CAUGAUGGAACUGAGGAUCUGAGGAA                          |
| co3_82<br>43606_<br>x58 | CM0006<br>65.2/526<br>91378-<br>5269145<br>3 | 22 | 1E-07 | 44.1 | 58 | AAGAAATGAAGAACTAAAATTGGTCTTAGTATTGAAGTGAAGACACTGAGAT<br>CCAACCTCTGATCTTGCCCTAAAC                        |
| co3_82<br>49116_<br>x58 | CM0006<br>82.2/265<br>6624-<br>2656694       | 20 | ##### | 40.1 | 58 | CCACAATGATGGCAATATTTTTTCGTCAACAGCAGTTCACCTAGTGAGTGTTGA<br>GACTCTGGGTCTGAGTGA                            |
| co3_82<br>54684_<br>x58 | ENST00<br>0003846<br>62.1                    | 26 | ##### | 52   | 58 | CTTCCCATTTATTTGCTGCTTGTAGTCTCACAGTGATACGAGCAGTTATACGC<br>ATGGGAT                                        |

|                         |                                              |    |       |      |    |                                                                                                                                                |
|-------------------------|----------------------------------------------|----|-------|------|----|------------------------------------------------------------------------------------------------------------------------------------------------|
| co3_82<br>72744_<br>x56 | AC09023<br>3.16/199<br>8-1865                | 40 | ##### | 32.2 | 56 | UCAUCAGGUGGGAUAAUCCUUACCUGUUCCUCGUUUUGGAGGGCAGAUAG<br>AACAGGAUAAUUGGAGUUUGCAUGAUCCAUGAUUAAUGUCUCUGUGUAAUC<br>AGGACUUGCAAACUCUGAUUGUUCAUAUCUGAU |
| co3_82<br>78285_<br>x55 | ENST00<br>0003838<br>70.1                    | 40 | ##### | 79.8 | 55 | CCTCCTTTTCTTGCGGGGATCGGGCTTGTGGTGCCGCTCCCCGTAATGTAC<br>GGAGGAAG                                                                                |
| co3_82<br>84995_<br>x55 | CM0006<br>79.2/803<br>4584-<br>8034487       | 14 | ##### | 28.2 | 55 | ATCCTTTTGTACTTGGTAAGCATGATGATTGGGTTTTTATGCTTATATATGAGA<br>CATGCTTGTCTCAAATCTTGTTACAGCACATTACCCTTCCTACT                                         |
| co3_82<br>93508_<br>x54 | KN19647<br>9.1/1754<br>90-<br>175564         | 38 | 1E-16 | 75.8 | 54 | TGCAGATGATGTAAAAGAATATTTGCTATCTGAGAGATGGTGATGACATTTTAA<br>ACCACCAAGATCGCTGATGCA                                                                |
| co3_83<br>07683_<br>x53 | CM0006<br>82.2/384<br>21774-<br>3842164<br>7 | 21 | ##### | 34.2 | 53 | TCTTGTATCCAAAAGTGATCATGGGTTGCCTGTGTCCCGATCATTAAACAGTGC<br>AGGGGTAGGAGTGCTGAAAGACATCTCCCTGCGTTGGTCCAGCCTTCCCTT<br>TCAAACCCTGGAGCTTTCCACG        |
| co3_83<br>08372_<br>x53 | ENST00<br>0003627<br>61.1                    | 27 | ##### | 54   | 53 | GCGGCCGGTGATGAGAACTTCTCCCACTCACATTTCGAGTTTCCCGACCATGA<br>GATGACTC                                                                              |
| co3_83<br>08743_<br>x53 | ENST00<br>0005815<br>25.1                    | 39 | ##### | 30.2 | 53 | CGTGTATGATGACAACCTCGGTAATGCTGCATACTCCCGAGTGCGCGGTGGGG<br>AAGCCAAC                                                                              |

|                         |                                              |    |        |      |    |                                                                                                                                                                                                                               |
|-------------------------|----------------------------------------------|----|--------|------|----|-------------------------------------------------------------------------------------------------------------------------------------------------------------------------------------------------------------------------------|
| co3_83<br>27968_<br>x52 | ENST00<br>0004084<br>18.2                    | 15 | #####  | 30.2 | 52 | AAGACTACACTTTCAGGGATCCTTTCTTCAGTTCGTTACTAGAGGTTTCTCTGA<br>ATATGT                                                                                                                                                              |
| co3_83<br>39923_<br>x51 | AB06183<br>7.1/2430-<br>2563                 | 27 | #####  | 54   | 51 | UGGUCCAUCCUAAUCCUGCCGGUCCAUCUGUGGCCUGCCAGGUUUCGCU<br>UGUGGACCAGAGCACCCUAGAAGCCUCACCCGAGGAGUGAGCAGGGCUCC<br>AGUGGGCUCACGUCAUGGGCACUUCUAGACACUC                                                                                 |
| co3_83<br>48861_<br>x50 | ENST00<br>0005165<br>28.1                    | 26 | #####  | 52   | 50 | ATGCATCTATTTGACAGACCTGGAGCAGTTAGTGTGTGCTGCTAAGGTTTCTA<br>CCTCTAG                                                                                                                                                              |
| co3_83<br>52111_<br>x50 | CM0006<br>81.2/571<br>34260-<br>5713404<br>9 | 17 | #####  | 34.2 | 50 | CACTTTATACTTTTAGGGATGATTTCTATAATTCATGAGTGGAGAGGTTTCTCT<br>AGAGGTGTAGGGGACTGGAAACCACATCCAGGAAGTACAGCTTTCTCTCCTG<br>AGCATGAAGGTATCTTGCCATTTCTTCACTGCAATTGCCATTTGCCTTTTTTGT<br>TTTTCTTTTGAGATAGGGTGTACCTGTTGCCAGGCTGGAGGGCAGTGGT |
| co3_83<br>63746_<br>x49 | ENST00<br>0003628<br>74.1                    | 27 | 0.008  | 30.2 | 49 | TTGCAATGATGTGAATCTCTCACTGAATTCAACCTTGAAGTGCGAATCCATGA<br>GCTTTTT                                                                                                                                                              |
| co3_83<br>72468_<br>x49 | ENST00<br>0003908<br>56.1                    | 21 | 5E-07  | 42.1 | 49 | TTCCTCTGATGACTTCCTGTTAGTGCCACGTGTCTGGGCCACTGAGACACCAT<br>GATGGAA                                                                                                                                                              |
| co3_83<br>83177_<br>x48 | ENST00<br>0005167<br>08.1                    | 17 | 0.0005 | 34.2 | 48 | CCTCATTGATTAGTAGCTTCTGACTTTTGTCTGAGTTTGTGCTGAAGCTAGATGC<br>CATTCC                                                                                                                                                             |

|                         |                                                |    |       |      |    |                                                                                                                                                      |
|-------------------------|------------------------------------------------|----|-------|------|----|------------------------------------------------------------------------------------------------------------------------------------------------------|
| co3_83<br>93459_<br>x47 | L36588.1<br>/797-921                           | 25 | ##### | 50.1 | 47 | UCCCAAUGAAGAAACUUUCACAUGUCUUACUCUCUGUCCUAGUCCCAGAGC<br>CUGUAAAGGUGAACCACUGGGACUGGCUGGGGGAGAAGAGGAAGAUUUUGU<br>UCCAGAAGGAACUGUCUGAGGGAU               |
| co3_84<br>12319_<br>x46 | AC00606<br>4.10/138<br>690-<br>138555          | 34 | ##### | 67.9 | 46 | UUGUCCUGGCCUAAAAAAAAUCUGCUCCCCUGUGCUCAGUUCU AACAGGGUAG<br>UCUGGCAGGACACACAGCAAUUCUCCUCUCAGUUUAGGAGGGCCGUCCUAA<br>GAAUAGGGCUGGCUCUUAAGGCACGAGAGGACAAU |
| co3_84<br>30901_<br>x45 | ENST00<br>0004105<br>57.1                      | 24 | ##### | 48.1 | 45 | TGATGGCTGTTCTCTCACTGCTTGAAGCCTTAGGCAGTGGGATTTTGATCCA<br>TCATATA                                                                                      |
| co3_84<br>40797_<br>x44 | CM0006<br>63.2/173<br>864445-<br>1738643<br>69 | 23 | ##### | 46.1 | 44 | AACCAATGATGTAATGATTCTGCCAAATGAAATATAATGATATCACTGTAAAC<br>CGTTCCATTTTGATTCTGAGGTT                                                                     |
| co3_84<br>45197_<br>x44 | AC09772<br>0.5/8637<br>9-86467                 | 20 | 2E-06 | 40.1 | 44 | UGGUGCUGUGAUGAUGCCUAAUAUUGUGGUUUCGACUCACUGAGAGUAA<br>AAUGAGGACCUACAAUUCUUGGCUGUGUCUGAGCACCC                                                          |
| co3_84<br>52053_<br>x43 | ENST00<br>0003654<br>93.1                      | 24 | 1E-08 | 48.1 | 43 | TGTGCACATTGTTAGAGCTTGGAGTTGAGGCTACTGACTGGCCGATGAACTC<br>GCAAGTGT                                                                                     |
| co3_84<br>53472_<br>x43 | AJ22402<br>7.1/1-88                            | 19 | 3E-05 | 38.2 | 43 | UACUGUUAGUGAUGAUUUUAAAAUAAAAGCAGAUGGGAAUCUCUCUGAGA<br>AAGAAAAUGGGAGAUUAAUCCUUAACCUGAAACAGUA                                                          |

|                         |                                      |    |       |      |    |                                                                                                                                              |
|-------------------------|--------------------------------------|----|-------|------|----|----------------------------------------------------------------------------------------------------------------------------------------------|
| co3_84<br>62932_<br>x43 | AC11750<br>3.8/2098<br>01-<br>209669 | 25 | ##### | 50.1 | 43 | UAGCAAGCCUCCAGCGUGCUUGGGUCUGCAGUGACCCCGUGGAUUCUAC<br>AGGGCUUGCCAGAACAGUUUUGAAAUGGUUUGAGGCCUUGCCGUGCUCCA<br>UGUAGAGCAAGGUUAUAGAAAUUUCAGACAAUG |
| co3_84<br>63491_<br>x43 | ENST00<br>0003847<br>92.1            | 27 | ##### | 54   | 43 | GTGCAAACCTCGATCACTAGCTCTGCGTGATGTGGCAGAAGCGAAGGGAACCA<br>GGTTTGCA                                                                            |
| co3_84<br>66375_<br>x42 | ENST00<br>0003845<br>12.1            | 33 | 1E-13 | 65.9 | 42 | GGTCAATGATGTGTTGGCATGTATTATCTGAATCTATTGCTGATGTGTAATAAC<br>ACTTTA                                                                             |
| co3_84<br>66585_<br>x42 | ENST00<br>0003913<br>05.1            | 26 | 8E-10 | 52   | 42 | GCCGAGACTAGAGTCACATCCTGACACAACCTTTGTCCTGGTGTGCTAGAGT<br>ACTCGAAG                                                                             |
| co3_84<br>67551_<br>x42 | ENST00<br>0003641<br>13.1            | 26 | ##### | 52   | 42 | ATCGAGGCTAGAGTCACGCTTGGGTATCGGCTATTGCCTGAGTGTGCTAGAG<br>TCCTCGAA                                                                             |
| co3_84<br>77463_<br>x42 | ENST00<br>0003912<br>09.2            | 18 | ##### | 28.2 | 42 | AAGACGATACTTTCAAGAATCATGATCATTCTATACAGTTCATTACTAGAAAAG<br>TTTCTC                                                                             |
| co3_84<br>86212_<br>x41 | ENST00<br>0003840<br>72.1            | 25 | ##### | 50.1 | 41 | TGGTCATTACCAAGGCTTTTAGAATGCAGTTTCTCATTGCTGTGGACATGAC<br>CATAAAA                                                                              |
| co3_84<br>97528_<br>x41 | ENST00<br>0003861<br>48.1            | 38 | ##### | 44.1 | 41 | GATCCTGGTGATGACAGACGACATTGTCAGCCAATCCCCATGTGGTAGTGAG<br>GACATGTC                                                                             |

|                         |                      |    |       |      |    |                                                                                                                                                                                                                                                                                                                                                               |
|-------------------------|----------------------|----|-------|------|----|---------------------------------------------------------------------------------------------------------------------------------------------------------------------------------------------------------------------------------------------------------------------------------------------------------------------------------------------------------------|
| co3_84<br>98899_<br>x40 | AY07774<br>0.1/1-330 | 22 | 1E-07 | 44.1 | 40 | UGGAAAUGAUGAAAUAGAGAUAAUUGGGUGUUGAAUGUUGUAUGACUGGA<br>AAUUUUUAAUAUGUAUUAUUGUAAUUCUUAUAAGUUUAGUGUUUUUJAGG<br>UACUUAUAGAGAGUGUGUAUGCAUGUGUGUGUCUUGUGGUGGCUAUGG<br>AAAGGGGGCACUGACUGGUGAUGCUGAUAAUUGGAGUGCAUCUGAGGCUGU<br>UGUAGAAAUAACAUGGGUUGUUGAUUACAACAUUGCCAAUGAUUUAACCC<br>AAGAACAGCUCACCUAACUAGCCUGGCACCCUAAAUCUCUAACAGGUUCA<br>UUAAAUGGUCCUGUGAUCUGAUCCAA |
|-------------------------|----------------------|----|-------|------|----|---------------------------------------------------------------------------------------------------------------------------------------------------------------------------------------------------------------------------------------------------------------------------------------------------------------------------------------------------------------|

|                         |                                              |    |       |      |    |                                                                                                                                                                                                                          |
|-------------------------|----------------------------------------------|----|-------|------|----|--------------------------------------------------------------------------------------------------------------------------------------------------------------------------------------------------------------------------|
| co3_85<br>04299_<br>x40 | ENST00<br>0005778<br>87.1                    | 17 | ##### | 34.2 | 40 | TTGCTGTGATGACTATCATTGGGTTTCGCATGTTGCTGAGTTCAGTGATGCC<br>TCTTTTC                                                                                                                                                          |
| co3_85<br>15184_<br>x39 | ENST00<br>0003843<br>84.1                    | 23 | ##### | 46.1 | 39 | GGGTCATTTCAAAGAGGGCTTATGAGGCTGTGAAACCCAGAGCTCTTAACGC<br>TGTGACCA                                                                                                                                                         |
| co3_85<br>18967_<br>x39 | CM0006<br>79.2/440<br>25223-<br>4402502<br>0 | 15 | ##### | 30.2 | 39 | AAGCTTGTACTCTCAGTGATCATTGCTGTAGTTACGAGATAAGCTTCTCTGAA<br>CATGCAGAGCAGTGGTAACTATGAGGAGGCACAGTCTCTCCTGAGCATGACT<br>CTGGCTGTTGGTGTGGCTTTGCTGCAGCTGCCGTGTGCCATTGATGATCCTG<br>CTCCTCTTCCTTCGGGAAAGTAAGAGGGAGAGAACAGTCTGAGTGGG |

|                         |                                                |    |       |      |    |                                                                                                                                             |
|-------------------------|------------------------------------------------|----|-------|------|----|---------------------------------------------------------------------------------------------------------------------------------------------|
| co3_85<br>34190_<br>x38 | ENST00<br>0003845<br>67.1                      | 43 | ##### | 85.7 | 38 | ATGCGATGATGAGTGAAGTAGAGCCTGACCTGGTATTGCCATTGCTTCACTGT<br>TGGCTTT                                                                            |
| co3_85<br>36394_<br>x38 | ENST00<br>0003642<br>87.1                      | 23 | 2E-05 | 38.2 | 38 | TATTCTTCTTGTTAGAGCTCGGAGTTGAGGCCAGTGACTGGCCAATGAACTCA<br>CAAGTGT                                                                            |
| co3_85<br>40042_<br>x38 | ENST00<br>0003631<br>07.1                      | 15 | 0.005 | 30.2 | 38 | CCAATGTGTAATATCCTGGGATATCATTTTTTCTAGGCTTTGTCCACATGGCTT<br>AGGGGA                                                                            |
| co3_85<br>42474_<br>x38 | CM0006<br>74.2/110<br>496421-<br>1104963<br>52 | 43 | 4E-10 | 54   | 38 | AATCAATGATGAAACCTATCCCAAAGCTGATGACCTGAAGAAAAATACGTACA<br>GATTCAGCTTCTGAGAT                                                                  |
| co3_85<br>49498_<br>x37 | AY07774<br>2.1/1-131                           | 25 | 3E-09 | 50.1 | 37 | UGGGAGGCUGAUACACAAAUUGGGCUGAAAUACUGCUCUACUUGUCACCA<br>UGCCUCCCUAGAAUAAACUGCCUUUUGAUGACCGGGACGAAUUGAGUGAAA<br>UCGUAACGGACAGAUACGGGGCAGACAGAU |
| co3_85<br>75610_<br>x36 | CM0006<br>73.2/628<br>53968-<br>6285390<br>4   | 33 | 1E-13 | 65.9 | 36 | TTTCTATGATGAATCAAACCTAGCTCACTATGACCGACAGTGAAAATACATGAA<br>CACCTGAGAAAC                                                                      |
| co3_85<br>76654_<br>x36 | CM0006<br>63.2/156<br>192176-<br>1561920<br>63 | 21 | ##### | 34.2 | 36 | TTGCCGCCACACAACCAAATTAATAACACAGAAGGGTAAGGTAAGTCT<br>CCATTAAACCCAGGAAAGAGACTGGAAAACCTCCTTTGGAGCCTGTCTATAG<br>TCACAGGT                        |

|                         |                                                |    |        |      |    |                                                                                                                                                 |
|-------------------------|------------------------------------------------|----|--------|------|----|-------------------------------------------------------------------------------------------------------------------------------------------------|
| co3_85<br>76834_<br>x36 | CM0006<br>71.2/127<br>448630-<br>1274485<br>01 | 43 | #####  | 85.7 | 36 | CCCGCCACTGCACCTGACCAGGTCTCTGTTGGCTGGTGCAATCCAGTGGTGA<br>GCTGATAGTAAACCCCAGCTTAGGAAACAGGGTTGTTCTTCATGTGGATGACT<br>CTGTGCCGAAAGCATGGGAACAGCC      |
| co3_85<br>79164_<br>x35 | CM0006<br>67.2/151<br>10920-<br>1511078<br>6   | 41 | 0.0005 | 34.2 | 35 | TCATCAGGTGGGATCATCCTTACCTGTTTCTCCTTTTGGAGGGCAGATCAGAA<br>CATGATGATTGGAGAAGAATGAAACGTGATTAATAACTCTGTGTAATCAGGCC<br>TTGCAGCACCCCAATTGAGCCTTTCTGAT |
| co3_85<br>82209_<br>x35 | AJ60946<br>7.1/1-135                           | 22 | 1E-07  | 44.1 | 35 | AGCACUAUAUUUAAACCUGUGGAUGGGAAUAUUCCTTCAUUCUUGGUUACGC<br>UGUAGUGCAAAGAAUUCUGGCUCUCUGUUGCACAGCUGACUUGUGCCA<br>UUCUGCUGUUGCUGUAUAGAGUUAAGGAACAUGG  |

|                         |                                                |    |       |      |    |                                                                                                                                                                                                                                                                                                      |
|-------------------------|------------------------------------------------|----|-------|------|----|------------------------------------------------------------------------------------------------------------------------------------------------------------------------------------------------------------------------------------------------------------------------------------------------------|
| co3_85<br>95759_<br>x34 | AF49220<br>9.1/1-275                           | 28 | 6E-11 | 56   | 34 | AAUCUGUAGUCUUGGAGCCGCACAGGGUUGGUGGUACCCUCGAGCACACC<br>AGACUUGCAGAAAAAGCAUACUCCAGAGGAAGCUGAGGCAUGCCUGCUCGA<br>GAGCCAGCUGUCCAUGUGCAAUUUCCUCUGAUAGUUUCUGGUCACUGU<br>UGCCACGGUGAUAAUGACUGGGCUAUGUCAUUAUCUAUCCGCCAACAGUAA<br>GAGAAGCUUUGCAGUCGAGAUUUGUUUAGCAGAUGGAGUGUUUUCUGUU<br>GAACACUAAGUACUGCCACAAGU |
| co3_86<br>03307_<br>x34 | CM0006<br>63.2/173<br>866028-<br>1738659<br>68 | 40 | 7E-18 | 79.8 | 34 | CCTGGATGATGATAAGCAAATGCTGACTGAACATGAAGGTCTTAATTAGCTCT<br>AACTGACT                                                                                                                                                                                                                                    |
| co3_86<br>20086_<br>x33 | ENST00<br>0003629<br>81.2                      | 15 | 0.007 | 30.2 | 33 | AAGACTATACTTTTCAGGGATCATTCTACATTTCCGGGTAATTTCTTTGAACAT<br>GTGGAG                                                                                                                                                                                                                                     |
| co3_86<br>23353_<br>x33 | ENST00<br>0003911<br>45.1                      | 33 | 8E-14 | 65.9 | 33 | TTATAAGTTTTCTAAGTGTCTAATGATGAATTTATAGGGCAGATTCTGAGGTG<br>AAAATT                                                                                                                                                                                                                                      |
| co3_86<br>26092_<br>x33 | AC09218<br>4.7/5032<br>7-50196                 | 17 | ##### | 34.2 | 33 | UUGUCCUGGCCUAGGCCAUUUCUGUCUCCCCGCGCUCAGUCCUAGCAGAG<br>UAGUCUGGCAGGACGCACAGCAAUCUCCUCUCAGUUUAGGAGGGCCGUC<br>UCCUAAGAAUAGGGCUGGCAGGAAAGGACAAU                                                                                                                                                          |
| co3_86<br>31343_<br>x32 | ENST00<br>0005170<br>31.1                      | 18 | ##### | 28.2 | 32 | TATAGTGTGGCCATGGGATCTCCAAGTGCATGCAAGAGCAACCTGGAGAGAC<br>TTTGACAG                                                                                                                                                                                                                                     |

|                         |                                                |    |        |      |    |                                                                                                                 |
|-------------------------|------------------------------------------------|----|--------|------|----|-----------------------------------------------------------------------------------------------------------------|
| co3_86<br>33423_<br>x32 | CM0006<br>73.2/115<br>627185-<br>1156270<br>82 | 18 | #####  | 28.2 | 32 | GTCCTTTTGTAGTTCATAAGCGAGATGATTGGGTGTTCAGGCACATGTGTGAG<br>ATGTGCCTCCTTCAAACCTTGTTACAACGTCAGCACATTACCCGCCTGACA    |
| co3_86<br>42831_<br>x32 | AC01686<br>8.8/2125<br>8-21186                 | 24 | 0.0006 | 32.2 | 32 | GUGUGAUGAAAUCACCCCAAUAGCUGGAAUUACCAGCAGAUUGUGUAGUG<br>GUGAACCUACAAUUUUCUGAAG                                    |
| co3_86<br>49537_<br>x31 | CM0006<br>77.2/250<br>70432-<br>2507052<br>6   | 33 | 8E-14  | 65.9 | 31 | GGATCGATGATGAGTCCTCCAAAAAACATTCTTGAAAAGCTGAACAAAAT<br>GAGTGAGAACTCATACCGTCGTTCTCATCGGAACTGAGGTCC                |
| co3_86<br>68293_<br>x30 | ENST00<br>0003867<br>45.1                      | 23 | 4E-08  | 46.1 | 30 | GCTGTTTCAGTGATGAGGCCTGGAATGTGCGCTGGGCACAGCGCCCGAGACA<br>GACTGCGGA                                               |
| co3_86<br>68983_<br>x30 | AC10279<br>9.9/5350<br>8-53611                 | 37 | 4E-16  | 73.8 | 30 | UGGUCUCAAGGAAGGGAUGAUGUCCAGUUGAGACUCAAGAAAAGGAUUC<br>UGAGCCUCAGAGCUUUGAAGGAGCCACUUGGUCCCUGACCUUCCUAGAGG<br>CAAA |
| co3_86<br>69463_<br>x30 | CM0006<br>67.2/138<br>561110-<br>1385610<br>43 | 31 | #####  | 61.9 | 30 | GTGCAATGATGTATTTTATTCAACACATCATTCTGAAAGAACGTGTGGAAAAT<br>AATGACTGAGCACA                                         |
| co3_86<br>69943_<br>x30 | CM0006<br>67.2/181<br>241892-<br>1812418<br>14 | 32 | 3E-13  | 63.9 | 30 | GGTCCTGGTATGACAGATGGCATTGTCAGCCAATCCCCAAGTGGGAGTGAG<br>GACATGTCCTGCAATTCTGAAGGGATT                              |

|                         |                                              |    |       |      |    |                                                                                                                                                  |
|-------------------------|----------------------------------------------|----|-------|------|----|--------------------------------------------------------------------------------------------------------------------------------------------------|
| co3_86<br>71953_<br>x30 | CM0006<br>73.2/628<br>54695-<br>6285462<br>1 | 22 | ##### | 44.1 | 30 | GTCAGATGATTTGAATTGATAAGCTGATGTTCTGTGAGGTACAAAAGTTAATA<br>GCATGTTAGAGTTCTGATGGCA                                                                  |
| co3_86<br>73843_<br>x30 | ENST00<br>0003911<br>43.1                    | 22 | ##### | 28.2 | 30 | TGTCCTTGACTTGGGTAGAGTGATGTCTGGTTGGTGCTGCCTATCTCATATAA<br>GCCAGGG                                                                                 |
| co3_86<br>88417_<br>x29 | ENST00<br>0003653<br>82.1                    | 20 | 2E-06 | 40.1 | 29 | TCGCTGTGATGAGTGATTGTTAAACATTCGTAGTTTCCACCAAAGCTTGGCT<br>AATGATG                                                                                  |
| co3_86<br>91230_<br>x29 | ENST00<br>0003842<br>81.1                    | 22 | ##### | 44.1 | 29 | GAGCACTGTTCGTAACCCGTTAGCCTGGCTGTAGCTAATGGGTTCCATTCCG<br>GTGCAATA                                                                                 |
| co3_86<br>97784_<br>x29 | AJ60948<br>0.1/1-137                         | 33 | ##### | 65.9 | 29 | GAGCACCUGAAUCUUUCCCAUUCUUGCUGCCUCGUGCCGGUGUGGGGAC<br>AGAUGGUGCUACAGAAUGAGCAGAGGAAAUCCAGACAGGUUGUUUCCAU<br>UUGUCUUGGGGCCUGUCUCUACAGCUCUGCCACAUUU  |
| co3_87<br>13180_<br>x28 | AC02395<br>0.6/1585<br>70-<br>158435         | 26 | ##### | 52   | 28 | UGCCCAUUCUCAAAAGAGAAUAGGCACUGUUGAUCAUGCGAUCCAGAGAUU<br>GUUAAUGGGGCUGCAUUGAGAAACAAGCUAUGUUUCCAUUCACAGCAAACA<br>CAUCGCAGUGGUGACAAUGAGACCUGUAACAUUU |
| co3_87<br>19984_<br>x28 | ENST00<br>0003845<br>33.1                    | 15 | 0.008 | 30.2 | 28 | GGATCGATGATGACTTTTCATACATGCATTCTTGAAAGCTGAACAAAATGAG<br>TGAAAAC                                                                                  |

|                         |                      |    |       |      |    |                                                                                                                                                |
|-------------------------|----------------------|----|-------|------|----|------------------------------------------------------------------------------------------------------------------------------------------------|
| co3_87<br>21076_<br>x28 | AJ60947<br>1.1/1-132 | 38 | ##### | 75.8 | 28 | GUUGAGGUCUAUCCCGAUGGGGCUUUUCCUGUAGCCUGCACAU CGUUGGA<br>AACGCCUCAUAGAGUAACUCUGUGGUUUUACUUUACUCACAGGACU AUUGU<br>UAGAUCUGUGGGAAGGAAUUACAAGACAGUU |
|-------------------------|----------------------|----|-------|------|----|------------------------------------------------------------------------------------------------------------------------------------------------|

|                         |                      |    |       |      |    |                                                                                                                                                                                                                                                                                                                                                                |
|-------------------------|----------------------|----|-------|------|----|----------------------------------------------------------------------------------------------------------------------------------------------------------------------------------------------------------------------------------------------------------------------------------------------------------------------------------------------------------------|
| co3_87<br>27050_<br>x27 | AF30828<br>3.1/1-330 | 25 | 3E-09 | 50.1 | 27 | GCCACAUGAUGAUUCAAGGCUGUUGUGAUUCAGUUGGUUUUGGCUAAGCC<br>CAGGGACCUUUGGCCUGUUAAGGUCUGUAAUCUUGGUGGGCGAUACAGA<br>GUUAUGUGUGUUCACUGUAAGGGCAGACCAACAAGAACUUUUUCCUACUUU<br>UGAGCUACCUCUUUUUAAUAGGGGUGAUUCUCCAGUUGCUGGAGAGAAA<br>UUGUGGUAACUGGAGUGAGAGAGUAGGAACAGGGCAUGUUCAGGGUAUCA<br>GGCCAAGGGUCCUAAAGGACUUAGCUUGUGUUAUGGCCACUGAGAGAUG<br>AAACACAGAUCUUUGGUAUCUGAUGGCU |
|-------------------------|----------------------|----|-------|------|----|----------------------------------------------------------------------------------------------------------------------------------------------------------------------------------------------------------------------------------------------------------------------------------------------------------------------------------------------------------------|

|                         |                                       |    |       |      |    |                                                                                               |
|-------------------------|---------------------------------------|----|-------|------|----|-----------------------------------------------------------------------------------------------|
| co3_87<br>38687_<br>x27 | AC01103<br>1.12/168<br>663-<br>168575 | 20 | ##### | 40.1 | 27 | GCUGGCACAAUGAUGACUUAUUUACUUUUUGCCGUUUACCCAGCUGAGG<br>UUGUCUUUGAAGAAUAAUUUUUAAAGACUGAGAUGCCAGU |
|-------------------------|---------------------------------------|----|-------|------|----|-----------------------------------------------------------------------------------------------|

|                         |                           |    |       |      |    |                                                                  |
|-------------------------|---------------------------|----|-------|------|----|------------------------------------------------------------------|
| co3_87<br>39362_<br>x27 | ENST00<br>0003845<br>74.1 | 19 | ##### | 38.2 | 27 | TGCACTGCATGGTATCTGCACTCAGCAGTTTACACCTGCTAGGGTGTTCAAAG<br>GTCAGTG |
|-------------------------|---------------------------|----|-------|------|----|------------------------------------------------------------------|

|                         |                                              |    |       |      |    |                                                                                                   |
|-------------------------|----------------------------------------------|----|-------|------|----|---------------------------------------------------------------------------------------------------|
| co3_87<br>45493_<br>x26 | CM0006<br>82.2/492<br>80319-<br>4928040<br>9 | 46 | 2E-21 | 91.7 | 26 | GCTGGCATATATGATGACTTAGCTTTTTTCCCCGACAGATCGACTATGTTGAT<br>CTAACTTTTCTAAGCCAGTTTCTGTCTGATATGCCAGC   |
| co3_87<br>52825_<br>x26 | ENST00<br>0005850<br>78.1                    | 15 | ##### | 30.2 | 26 | GTGCTGTGATGATGCCTTAATATTGTGGTTTCGACTCACTGAGAGTAAAATGA<br>GGACCTA                                  |
| co3_87<br>62237_<br>x26 | ENST00<br>0003909<br>62.1                    | 44 | ##### | 56   | 26 | AAATAATGAAATCACCCAAAATAGCTGGAATTACTGGCAGATTGTGTAGCAAT<br>AAACCTA                                  |
| co3_87<br>64913_<br>x25 | ENST00<br>0003842<br>52.1                    | 27 | 2E-10 | 54   | 25 | GCTATGATGAATTTGATTGCATTGATCGTCTGACATGATAATGTATTTTTGTCC<br>TCTAAG                                  |
| co3_87<br>68563_<br>x25 | ENST00<br>0003913<br>09.1                    | 21 | ##### | 34.2 | 25 | ATACATGATGACTTACATGGACTCTCATTGAGCTAATGACTTGCTGCTGAAAC<br>ATGAAA                                   |
| co3_87<br>69513_<br>x25 | ENST00<br>0005172<br>83.1                    | 19 | ##### | 30.2 | 25 | ACCTTCTTGTTTAAGCTCTGTACTAAAATTGCAGAACTAGTATCGTGTCTTAC<br>CATTTG                                   |
| co3_87<br>71588_<br>x25 | ENST00<br>0004087<br>16.1                    | 35 | ##### | 69.9 | 25 | GCAGACTCACTATGCACCTGACTGTACTTCCAGGCAGGTGCTTTTTCTGTCTG<br>CCAGAGA                                  |
| co3_87<br>79488_<br>x25 | CM0006<br>84.2/393<br>15307-<br>3931521<br>3 | 41 | 2E-18 | 81.8 | 25 | GCTGTTGTTGATGAGGCTCAGAGTGAGCGCTGGGTACAGCGCCCGAATCG<br>GACAGTGTAGAACCATTCTCTACTGCCTTCTTCTGAGAACAGC |
| co3_87<br>95969_<br>x24 | ENST00<br>0003639<br>61.1                    | 22 | ##### | 44.1 | 24 | TTGCAGTGATGTAAAATTTCTTGGCCTGAAATTACTGTGAAGAGTAAAACCGA<br>GCTTTTT                                  |
| co3_87<br>96209_<br>x24 | ENST00<br>0003911<br>00.1                    | 24 | 3E-06 | 40.1 | 24 | TCCAGCAGTAGTCAGCCATCCGGACAGAACCGTTCCTGTGATGGTGTACAC<br>TGCTGGGA                                   |

|                         |                                                |    |       |      |    |                                                                                                                                                    |
|-------------------------|------------------------------------------------|----|-------|------|----|----------------------------------------------------------------------------------------------------------------------------------------------------|
| co3_87<br>96833_<br>x24 | AC05585<br>5.9/1107<br>36-<br>110601           | 18 | ##### | 36.2 | 24 | GUGACUGUCCUGGUUUAUUGAUUUGCAUUUGUUAGUUGUACAGUGCAACCAU<br>AGACAGUCACACACAUUAAAACAGAUGGUUCCUGCCGACAGGGUCUGUAUA<br>GUUAUCAGAUUUUCUGUGCGAUGGCUCCAUACAUG |
| co3_88<br>01777_<br>x24 | CM0006<br>75.2/211<br>39957-<br>2113988<br>6   | 39 | ##### | 38.2 | 24 | ACTCCATGATGAACCCAAAATGCCAAGTATATGACTGAACTTACAAGTGATAC<br>CATCTTACGACTGAAGAGT                                                                       |
| co3_88<br>08853_<br>x23 | ENST00<br>0005052<br>19.1                      | 27 | 2E-10 | 54   | 23 | GGGCATACTCGTAGACCTTGCCTGACTGTGCTCATGTCCAGGCAGGGGGGA<br>CAGTGTATG                                                                                   |
| co3_88<br>12372_<br>x23 | ENST00<br>0006268<br>86.1                      | 40 | 7E-18 | 79.8 | 23 | GCTGTCCTGGACCTGTTGGCACCACAGACAGTTGCTCTGCTGTGCCTGTGGC<br>CTCGGGGC                                                                                   |
| co3_88<br>20077_<br>x23 | AC01341<br>6.4/5544<br>1-55577                 | 21 | ##### | 42.1 | 23 | UGCAGUCAAGUCAAAUUCAGUGCCCGUUUCUGUCAUAGCGGGGGCUGGCC<br>CAGAUGGCUGCCACAGCAAGCUCCACAGCUCAUGGGCCCUGGGUCACCUA<br>CCCUGGGACCUGGGGAUAAGUUUGGCUGUGGACAGUG  |
| co3_88<br>21411_<br>x23 | ENST00<br>0004268<br>67.1                      | 35 | 5E-15 | 69.9 | 23 | TCTCAGTGATGTAATTCCAATAGATCCTTCTGACCCTCCACTGTGGACTCAAT<br>AGCAGGG                                                                                   |
| co3_88<br>24999_<br>x23 | ENST00<br>0004085<br>87.1                      | 38 | 1E-16 | 75.8 | 23 | CAGCCTGAAGTGATGATTCACATTCATGTCTCTTCTCTGATAAATTCTTGAAGA<br>AAATTT                                                                                   |
| co3_88<br>30980_<br>x22 | CM0006<br>69.2/140<br>375666-<br>1403755<br>63 | 19 | 0.004 | 30.2 | 22 | ATTCTTTTCGTAGTTTCGTAAGCTGGATTATTGAGTATTCACACACGTGTGTGAG<br>ATGTGCCACCCTTGAACCTTGTTACAACGTGGGCACATTATTCACTTGACA                                     |
| co3_88<br>33620_<br>x22 | ENST00<br>0003843<br>42.2                      | 23 | 4E-08 | 46.1 | 22 | CCCTTGGCCCTTATCGAAGCTGCAGCTGCTTCCGCATAGCTGCTGTGGTCAA<br>AAAGGAGC                                                                                   |
| co3_88<br>34038_<br>x22 | ENST00<br>0004088<br>13.1                      | 29 | 2E-11 | 58   | 22 | TGGCCAAGGATGAGAACTCTAATCTGATTTTATGTGCTTCTGCTGTGATGGAT<br>TAAAGGA                                                                                   |

|                         |                                              |    |       |      |    |                                                                                                                                                            |
|-------------------------|----------------------------------------------|----|-------|------|----|------------------------------------------------------------------------------------------------------------------------------------------------------------|
| co3_88<br>35842_<br>x22 | CM0006<br>77.2/665<br>02910-<br>6650281<br>2 | 29 | 2E-11 | 58   | 22 | TGCAATGATGTCGTAATTTGCGTCTTACTCTGTTCTCAGCGACAGTTGCCTGC<br>TGTCAGTAAGCTGGTACAGAAGGTTGACGAAAATTCTTACTGAGCA                                                    |
| co3_88<br>43938_<br>x22 | ENST00<br>0005159<br>69.1                    | 20 | 0.001 | 32.2 | 22 | TTCAAAAAAGACCATATATCCTTGAAGAGTAACTGCTGAACTTATTCACTGGCA<br>GTGGGC                                                                                           |
| co3_88<br>47392_<br>x22 | CM0006<br>73.2/754<br>04421-<br>7540456<br>6 | 21 | ##### | 42.1 | 22 | CTTCAGTGATGACACGATGACGAGTCAGAAAGGTCACGTCCTGCTCTTGGTC<br>CTTGTCAGTGCCATGTTCTGTGGTGCTGTGCACGAGTTCCTTTGGCAGAAGT<br>GTCCTATTTATTGATCGATTTAGAGGCATTTGTCTGAGAAGG |
| co3_88<br>49724_<br>x22 | AB02889<br>3.1/4087-<br>4152                 | 21 | 5E-07 | 42.1 | 22 | CGUCCAUGAUGUUCGCAACUACCUACAUUGUUUGAUCCUCAUGAAAGCAG<br>CACUGGCUGAGACGC                                                                                      |
| co3_88<br>59839_<br>x21 | ENST00<br>0004596<br>23.1                    | 16 | 0.001 | 32.2 | 21 | TTTTGGTTGAAATATGATGAGTGTACAAAATCTTGATTTAAGTGAATGAAAAAT<br>TACAAG                                                                                           |
| co3_88<br>63787_<br>x21 | ENST00<br>0003863<br>07.1                    | 47 | ##### | 54   | 21 | GCTGGTGTAATGATGACTTCACTTTTTTCCCATCAGATCGACAATGCTGAC<br>GTCCTTAT                                                                                            |
| co3_88<br>80268_<br>x20 | CM0006<br>63.2/517<br>24896-<br>5172477<br>5 | 22 | 0.009 | 28.2 | 20 | GTGCCCTTTTAAGGTTGACGCAGTGCTTTAAGGGGCTAACACAGAAGGGTAA<br>AGGAAGTCTCCATAAACCCAGAGAAGAGATTGTAAGCTCCTCTTTAGAACC<br>TTTCTGGAGTCACACCT                           |
| co3_88<br>80648_<br>x20 | ENST00<br>0003843<br>60.1                    | 25 | 3E-09 | 50.1 | 20 | GACCTCCTGGGATCGCATCTGGAGACTGCCTAGTATTCTGCCAGCTTCGGAA<br>AGGGAGGG                                                                                           |
| co3_88<br>82288_<br>x20 | ENST00<br>0003880<br>90.1                    | 23 | 4E-08 | 46.1 | 20 | TGCACTTATGTATGTTTTTGTTTAACGTGGACAAAGACTTACAGATAGGTGCAA<br>AAAATA                                                                                           |

|                         |                                                |    |       |      |    |                                                                                                                                                                                                                    |
|-------------------------|------------------------------------------------|----|-------|------|----|--------------------------------------------------------------------------------------------------------------------------------------------------------------------------------------------------------------------|
| co3_88<br>90208_<br>x20 | ENST00<br>0003910<br>02.1                      | 33 | 3E-11 | 58   | 20 | GCCTTTGCAGCTGATGATACAGCTTCTTTCCCATCAGATCGACCCTGTTGAT<br>CTCTACA                                                                                                                                                    |
| co3_88<br>93428_<br>x20 | ENST00<br>0003845<br>50.1                      | 23 | 4E-08 | 46.1 | 20 | TGGATATGATGACTGATTACCTGAGAAATAATTGATGAAATCTCAAGAAAATTC<br>CTCTAG                                                                                                                                                   |
| co3_89<br>03557_<br>x19 | ENST00<br>0003869<br>10.1                      | 16 | 0.001 | 32.2 | 19 | CCCCTATCTCTCATGATGAACACATATGCCTCTGAGCTGCTGTGATTTCTGGC<br>TTCAAAG                                                                                                                                                   |
| co3_89<br>07376_<br>x19 | ENST00<br>0003847<br>72.1                      | 18 | 5E-05 | 36.2 | 19 | TGGTTGTTACCAAGGCATTTAGCATGCAATTTCTCATTTGCTGTGGACACGAC<br>GAGAAGA                                                                                                                                                   |
| co3_89<br>13057_<br>x19 | CM0006<br>67.2/139<br>278781-<br>1392789<br>78 | 37 | 4E-16 | 73.8 | 19 | TCCAGCGGTTGTCAGCTATCCAGGCTCATGTGGTGCCTGTGATGGTGTTACA<br>CTGTTGGAAGAGCAAACACTGTCTTTATTGAGGTTTGGCTCCAAGCACTGTTT<br>TGGTGTGTAGCTGAGTACCTTTGGGCAGTGTGTTTGCACCTCTGAGAGTGGA<br>ATGACTCCTGTGGAGTTGATCCTAGTCTGGGTGCAAACAAT |
| co3_89<br>23041_<br>x18 | ENST00<br>0003855<br>73.1                      | 14 | ##### | 28.2 | 18 | TGCACTTATGTATGTTTTTGTGTTAACTTGTGGACAAAGACTTATGGATAGGTGC<br>AAAAAA                                                                                                                                                  |
| co3_89<br>23599_<br>x18 | U43901.<br>2/4011-<br>4161                     | 21 | ##### | 42.1 | 18 | GCUGCACACUAUJAAAGCUCAGGGUGGAGGCCAGUCUJGGCUCAUGAACU<br>UCUGAGUGUCGGAAGUGUGCUAUUAUCAUUGGCAGGAUUUCGCUAACACC<br>AGUAGAGCUJGCCUCUAUGACUGGAGUUUGGUAGUACUCGCUGCCACAU<br>A<br>G                                            |
| co3_89<br>30241_<br>x18 | CM0006<br>69.2/152<br>595923-<br>1525960<br>30 | 31 | 1E-07 | 46.1 | 18 | AGGCCCTGTAGTTCCCGAGCACGATGACTGGGTGTTTACGTGCACGTGTG<br>GGATGTGCCACCCTCTGAACCTTGTTACGATGTTGGCACATTACCCTGGACC<br>TGACC                                                                                                |
| co3_89<br>37585_<br>x18 | ENST00<br>0006378<br>69.1                      | 15 | 0.003 | 30.2 | 18 | TTTATTATTATTGTTGTTGTTATTTTGGAGTAGGACTCTCACTGTGTTGGCCAGG<br>CTGGAG                                                                                                                                                  |

|                         |                                                |    |       |      |    |                                                                                                                                                                     |
|-------------------------|------------------------------------------------|----|-------|------|----|---------------------------------------------------------------------------------------------------------------------------------------------------------------------|
| co3_89<br>43975_<br>x18 | AF25084<br>1.1/2261-<br>2352                   | 33 | 8E-14 | 65.9 | 18 | GGAUCGAUGAUGACUCCAUUAUGUACAUUCCUUGGAAAGCUGAACAAAAUG<br>AGUGAAAACUCUAUACCGUCAUCCUCGUCGAACUGAGGUCC                                                                    |
| co3_89<br>47593_<br>x18 | ENST00<br>0003645<br>78.1                      | 22 | 1E-07 | 44.1 | 18 | AAGCAGGATTCAGACTACAATATAGCTGTTAAGTGCTGTATTGTCATTCCCC<br>TGCTCAA                                                                                                     |
| co3_89<br>50407_<br>x17 | ENST00<br>0003644<br>60.1                      | 37 | ##### | 65.9 | 17 | TGGATTGGTGATGAGCAACAATCACCATCTTTCGTTTGAGTCTCATGGCCATG<br>AGACCAA                                                                                                    |
| co3_89<br>52124_<br>x17 | AJ60948<br>5.1/1-127                           | 22 | ##### | 44.1 | 17 | CUGGAGACUAAGAAAAUAGAGUCCUUGAAAUCAAGCUGACUCUGCUUUUAG<br>CCUCCUAAAUGAAAAGGUAGAUAGAACAGGUCUUGUUUGCAAAAUAAAUUC<br>AAGACCUACUUAUCUACCAACAGCA                             |
| co3_89<br>60777_<br>x17 | ENST00<br>0004591<br>74.1                      | 43 | 1E-19 | 85.7 | 17 | GGTGCAGATGATGACACTGTAAAGCGACCAAAGTCTGAACAAAGTGATTGGT<br>ACCTCGTT                                                                                                    |
| co3_89<br>64313_<br>x17 | ENST00<br>0003867<br>47.1                      | 20 | 5E-06 | 40.1 | 17 | GCTGTTTCGTTGATGAGGCTCAGAGTGAGCGCTGGGTACAGCGCCCGAATCG<br>GACAGTGTA                                                                                                   |
| co3_89<br>65945_<br>x17 | CM0006<br>82.2/384<br>49370-<br>3844950<br>3   | 32 | 0.001 | 32.2 | 17 | ACCTGCATTCAAAAATGATCACGGGCTGCCTGTGCTCTGGTCATCAATAACGC<br>AGGGAGAGGAATTGCTGAAAGCCGTTTCCCGTGTTTGGAGGGTTCACACCTG<br>TCCCTTTCAAATGCTGGCGCTTTCACACA                      |
| co3_89<br>70892_<br>x17 | ENST00<br>0003628<br>03.1                      | 44 | 3E-20 | 87.7 | 17 | TGCAATGATGTCGTAATTTGCGTCTTACTCTGTTCTCAGCGACAGTTGCCTGC<br>TGTCAGT                                                                                                    |
| co3_89<br>71844_<br>x17 | ENST00<br>0003843<br>34.1                      | 18 | 3E-05 | 36.2 | 17 | GCATGGCTGAATACTGTGTTCTTTTATCAGTAGTTTACACAGCCAGACACCAT<br>GCAAAAG                                                                                                    |
| co3_89<br>74038_<br>x16 | CM0006<br>73.2/117<br>263799-<br>1172639<br>52 | 14 | 0.009 | 28.2 | 16 | TTGTCCTGGCCTATGCTTTTTTCTACTCCCCTCTGCTTTTTTGGTCCCCCTGTGC<br>TCAGTTCTAACAAGGTAGTCTGGCAGGACACACAGCAGTCTCCTTCAGTTTAG<br>GAGGACTGTCTTTAGAATAGAGCTGTCCCAAGGCACAAGATTACAAT |

|                         |                                                |    |        |      |    |                                                                                                                                                  |
|-------------------------|------------------------------------------------|----|--------|------|----|--------------------------------------------------------------------------------------------------------------------------------------------------|
| co3_89<br>77238_<br>x16 | ENST00<br>0003847<br>62.1                      | 23 | #####  | 46.1 | 16 | AGCACTATATTTAAACCTGTGGATGGGAATATTCCCATTCTTGGTTACGCTG<br>TAGTGCA                                                                                  |
| co3_89<br>87286_<br>x16 | ENST00<br>0003861<br>57.1                      | 24 | 1E-08  | 48.1 | 16 | CTTCCTCAGCCTTACTCCAGGGACTTTTTGTTGCCTGTAAAGTGCTCTGGCAT<br>TGCCTGA                                                                                 |
| co3_89<br>88150_<br>x16 | ENST00<br>0003842<br>50.1                      | 16 | 0.0006 | 32.2 | 16 | TGCATTGCCATGGTATCTGCACTCAGTAGTTTATTCTGCTGGGTGTCCAAAG<br>ATCAGTG                                                                                  |
| co3_89<br>88742_<br>x16 | ENST00<br>0004081<br>89.1                      | 18 | 0.0001 | 36.2 | 16 | TTGCAGTGATGACTTGCGAATCAAATCTGTCAATCCCCTGAGTGCAATCACTG<br>ATGTCTC                                                                                 |
| co3_89<br>89670_<br>x16 | ENST00<br>0005167<br>33.1                      | 17 | #####  | 34.2 | 16 | TGCCAATGATGGTTAAGAATTTCTTCACCTGAATAAACCATGTGGTCAGCATT<br>GCATCTG                                                                                 |
| co3_89<br>91174_<br>x16 | AJ60947<br>3.1/1-130                           | 38 | 1E-16  | 75.8 | 16 | AAGCCAGCCAAUGAAUCUGCUUACCUGAUUGUGUUUGUGCAGACAUACUUU<br>AAAAACUGGCCAAUAGUAAAGCCAUGUUACGAGCCUUAAGGACAUUGAAGUC<br>GUUAAGGUCCCUGAGAAUGGCUAUAACA      |
| co3_89<br>94646_<br>x16 | ENST00<br>0003644<br>32.1                      | 20 | 2E-06  | 40.1 | 16 | CCCGCCACTGCACCTGACCAGGTCTCTGTTGGCTGGTGCAATCCAGTGGTGA<br>GCTGATAG                                                                                 |
| co3_90<br>03123_<br>x15 | CM0006<br>66.2/159<br>507029-<br>1595068<br>94 | 14 | 0.009  | 28.2 | 15 | GCGAGGAGGAGGCACAGGGTTCTCCCCTGAGAGCCAGGCCAGCTCTTAGTG<br>TTGCTTCGCTGCAGGTGCCATTTGGCATTGAGGATTGTTTTCTCTTCCCTCCG<br>GCAAAGTAAGAGGGAGAGGACACAGTCTGAGT |
| co3_90<br>06048_<br>x15 | ENST00<br>0003640<br>43.1                      | 27 | 2E-10  | 54   | 15 | AAGTAGGGTGATGAAAAAGAATCCTTAGGCGTGGTTGTGGCCGTCTTGGTCA<br>CCTGTGTG                                                                                 |
| co3_90<br>09108_<br>x15 | CM0006<br>85.2/150<br>902121-<br>1509022<br>35 | 40 | 0.001  | 32.2 | 15 | AAGACTATACTTTTCAGGAATTGTTTCTGTAGTACATTACTAGAGAATGTCCTCT<br>GAATGTGCAGAGCACAGAAAAATACAAAATAATAATAAATTCAAATCAGCTAT<br>CTGAGTA                      |

|                         |                                              |    |        |      |    |                                                                                                                                             |
|-------------------------|----------------------------------------------|----|--------|------|----|---------------------------------------------------------------------------------------------------------------------------------------------|
| co3_90<br>11898_<br>x15 | ENST00<br>0003633<br>89.1                    | 27 | #####  | 54   | 15 | GGCAGATGATGTCCTTATCTCACGATGGTCTGCGGATGTCCCTGTGGGAATG<br>GCGACAAT                                                                            |
| co3_90<br>17013_<br>x15 | ENST00<br>0003625<br>41.1                    | 21 | 5E-07  | 42.1 | 15 | TCTTAGTGACATAATTCTAATAGTTTGTTCGACCTTCCACTGTGGACTIONAATA<br>GCAGGG                                                                           |
| co3_90<br>24888_<br>x15 | AJ60947<br>7.1/1-132                         | 30 | 4E-12  | 60   | 15 | GGCCUCCUGGUGCUUACCACAGGCUGUGUUCUUACACUGACUGUAUAGAA<br>AGAGGAGGUAGAGUAAACCUACCCCAUUAACACCUCAGCUCAGGCCUGUG<br>CCUGGUCUGUAUUGUGAAUGGGGGAACAUAG |
| co3_90<br>29223_<br>x15 | AL13270<br>9.5/1555<br>70-<br>155499         | 34 | #####  | 67.9 | 15 | UGGAUCGAUGAUGACUGCUGGUGGCGUAUGAGUCUUACAUGAUGAAUACG<br>UGUCUGGAACUCUGAGGUCCAU                                                                |
| co3_90<br>30228_<br>x15 | ENST00<br>0003860<br>37.1                    | 25 | #####  | 50.1 | 15 | CAGGCTGTGATGATTGGCGCAGGGGTACGGACCTCAGCTGAGTCATGGGAG<br>CTGAATGTA                                                                            |
| co3_90<br>30808_<br>x14 | ENST00<br>0003847<br>14.1                    | 21 | 5E-07  | 42.1 | 14 | CTTCAGTGATGACACGATGACGAGTCAGAAAGGTCACGTCCTGCTCTTGGTC<br>CTTGTCAG                                                                            |
| co3_90<br>31676_<br>x14 | ENST00<br>0005161<br>90.1                    | 14 | #####  | 28.2 | 14 | TTGCGTCTATTTGACAGACTAGAATAATTACTATCTGCTGCTAAGGTTTCCCCT<br>GCAGAT                                                                            |
| co3_90<br>35638_<br>x14 | AL13270<br>9.5/1781<br>48-<br>178075         | 27 | 2E-10  | 54   | 14 | UGGACCAAUGAUGAGAUUGGAGGGUGUCUGAAUCAAAAAUUUUGAUUAAAG<br>CCAUCUGUAACUCUGAGGUCCAU                                                              |
| co3_90<br>40342_<br>x14 | CM0006<br>84.2/377<br>85526-<br>3778563<br>3 | 16 | 0.0005 | 32.2 | 14 | ATCCTTTTGTTCGTTTCATAAGCATGACGATTGGGCTTTCATGCTCATGCATGAG<br>ATGGGCCTCCCTTCAGTCTTGTTACAGGCCGGCTCTGTGGCTCATGCCTGTA<br>ATC                      |
| co3_90<br>42960_<br>x14 | ENST00<br>0004112<br>92.1                    | 16 | 0.001  | 32.2 | 14 | TGTGTGTTGGAGGATGAAAGTACGGAGTGATCCATCGGCTAAGTGTCTTGTG<br>ACAATGCT                                                                            |

|                         |                                                |    |       |      |    |                                                                                                                                                                                                                 |
|-------------------------|------------------------------------------------|----|-------|------|----|-----------------------------------------------------------------------------------------------------------------------------------------------------------------------------------------------------------------|
| co3_90<br>43394_<br>x14 | CM0006<br>63.2/173<br>865686-<br>1738656<br>22 | 21 | ##### | 42.1 | 14 | GTGTAATGATGTTGATCAAATGTCTGACCTGAAATGAGCATGTAGACAAAGGT<br>AACACTGAAGAA                                                                                                                                           |
| co3_90<br>47902_<br>x14 | ENST00<br>0005163<br>27.1                      | 14 | 0.008 | 28.2 | 14 | AGTTACTGTCTGCTGCTAATGTTTCCACTACAGATACAAGAAAAAGTCTCTTCA<br>CACTTT                                                                                                                                                |
| co3_90<br>49134_<br>x14 | ENST00<br>0003840<br>33.1                      | 20 | 2E-06 | 40.1 | 14 | GCTGCACACTATTAAGCTCAGGGTGGAGGCCAGTCTTGGCTCATGAACTTC<br>TGAGTGTC                                                                                                                                                 |
| co3_90<br>53362_<br>x14 | AJ24319<br>9.1/1-78                            | 22 | 1E-07 | 44.1 | 14 | GCCAUUGAUGUUUUCUUUUCGAAAGGUGAGCGCUUUGCGCAGUGAUGAC<br>CCUCAUCUAUCACCCUUGACUGAUGGCU                                                                                                                               |
| co3_90<br>57044_<br>x14 | ENST00<br>0003631<br>81.1                      | 32 | 2E-08 | 48.1 | 14 | GGTCAATGATGAGCTGACATGTATTCTGAATCTAAAGTTGATTATTAGTACTTT<br>AGTTCT                                                                                                                                                |
| co3_90<br>57590_<br>x14 | ENST00<br>0003913<br>16.1                      | 23 | 0.003 | 30.2 | 14 | TTCTTACAAATCTAAATGTGCTTTGATGCAAGTATATTTGAATCCCTTTCCATCT<br>GATAA                                                                                                                                                |
| co3_90<br>57954_<br>x14 | ENST00<br>0003654<br>73.1                      | 17 | ##### | 34.2 | 14 | TAGGCCCTGAATCAAGAAACGTGATGGTTTGCCATTGTAGCTATTGGTTTCAA<br>ACAAGAG                                                                                                                                                |
| co3_90<br>62028_<br>x13 | ENST00<br>0003640<br>89.1                      | 30 | 4E-12 | 60   | 13 | TCCAGCGGTTGTCAGCTATCCAGGCTCATGTGGTGCCTGTGATGGTGTTACA<br>CTGTTGGA                                                                                                                                                |
| co3_90<br>63913_<br>x13 | BL00000<br>2.1/9801<br>8519-<br>9801871<br>4   | 28 | 6E-11 | 56   | 13 | AGAGAAGCAAAGUGAUGAGUAAUACUGGCUGGAGCCCCAAAGAGGCACGU<br>GUGUGUGUUUGUGUGUGUGUGUUAUAGCUUGUCAGUGCAUGCACGUGUA<br>UGUCUGGGAGUACAAAUGGGUGCGACUGGUUGUAGGGAACUAGCUAUGUG<br>CCUUCUAUUAGGCCAUGACAGUCAACUGAUUAGAUCUGAUUGCUUC |
| co3_90<br>65330_<br>x13 | CM0006<br>68.2/388<br>22401-<br>3882230<br>7   | 33 | ##### | 58   | 13 | TCTGCTGGGGTGTTTAAAGGTCAGCGCTGTAGATATTCAGCATCTGGCATCTT<br>GGCTTCTGCTTGTAAACCTGGTATTTTTACTGATACAGTA                                                                                                               |

|                         |                                                |    |       |      |    |                                                                                                                                                                                                                         |
|-------------------------|------------------------------------------------|----|-------|------|----|-------------------------------------------------------------------------------------------------------------------------------------------------------------------------------------------------------------------------|
| co3_90<br>79695_<br>x13 | ENST00<br>0003911<br>41.1                      | 23 | 4E-08 | 46.1 | 13 | AACATGCTTCCTTAGATCCACCTTTGTGGATGAATCTTGAAGTGAAGTTCCACTT<br>GTAAAC                                                                                                                                                       |
| co3_90<br>85935_<br>x13 | ENST00<br>0003651<br>28.1                      | 14 | 0.008 | 28.2 | 13 | GCTGTAATGTGTGCATAGGTTTCATCTGTGTCTGGTAGCAGTGTCTGTCTGTG<br>TTTTTCA                                                                                                                                                        |
| co3_90<br>87625_<br>x13 | AC06483<br>6.7/3178<br>5-31868                 | 24 | 1E-08 | 48.1 | 13 | GUGUUCAAUGAUGAUUUUCUAAUUUGUUUGCCUGAUUUCCUUUUUGGAUAAUG<br>AAGGCAUCUUUAGUCACUACCUCUUCUGAGACAC                                                                                                                             |
| co3_90<br>91616_<br>x13 | ENST00<br>0003648<br>49.1                      | 24 | 1E-08 | 48.1 | 13 | GCTGGCACAATGATGACTTAAATTACTTTTTGCCGTTTACCCAGCTGAGGTTG<br>TCTTTGA                                                                                                                                                        |
| co3_90<br>95366_<br>x12 | AC09346<br>2.11/145<br>947-<br>146075          | 43 | 1E-19 | 85.7 | 12 | UGAGCACUUUCACAGGUCCUCCUCAGGCUGUGGGGCCAGGAUUUGGUAG<br>CUGGUGCUGAGAGAAAACCUUUGUUGGCAUCCUUGCCUGGGACUGUGCC<br>AGUGGCAGCUGUCAUUCUAAUGGGACAAUU                                                                                |
| co3_90<br>98498_<br>x12 | ENST00<br>0003647<br>22.1                      | 29 | 2E-11 | 58   | 12 | GATCAATGATGAAACTAGCCAAATCTGAGCATCAGAAGGCTTTCCGGTCTACC<br>TGATGCA                                                                                                                                                        |
| co3_91<br>00838_<br>x12 | ENST00<br>0003909<br>68.1                      | 23 | ##### | 30.2 | 12 | GTTTCATGATAAGTAACATTTCTTCAATTTGACCTGATGTGTATTGAAGAAAACC<br>AGCATC                                                                                                                                                       |
| co3_91<br>01006_<br>x12 | CM0006<br>63.2/163<br>923670-<br>1639238<br>73 | 20 | ##### | 32.2 | 12 | AAGACTATTCTTTTCAGGGATCATTATGCGAGAAGTTTTTCTGAATGCCTAAAGA<br>ACCAGAAAACCATGAGGACAGACAGCAGCATTTCCTGAGCTTGAAGCTG<br>GCTCTTGGCACTGGTTTGCTGCAACTGCCGTTTGCCATTGCTGATCATTTTTTC<br>TCTTCCTTTGGGAGAGTGAGGGGAAGAGAATGCAATCTGAGTGAT |
| co3_91<br>03046_<br>x12 | ENST00<br>0003650<br>74.1                      | 23 | 0.004 | 30.2 | 12 | CTGCAGATATTCTCACTGTTTTGATTTTGTAATAGTCAGGACAGGCTAACCATT<br>CACTTT                                                                                                                                                        |
| co3_91<br>08530_<br>x12 | AC06483<br>6.7/3006<br>6-30155                 | 18 | 0.009 | 28.2 | 12 | UGAUGGCAAUGAUGAUUUUUACACUUUUUGUUGUUCACCUGAUACAUAUAAA<br>UAUGAGGGUGUUCAGUCACUACCUCUUCUGAUGCCAUCA                                                                                                                         |
| co3_91<br>12658_<br>x12 | ENST00<br>0004591<br>55.1                      | 24 | 1E-08 | 48.1 | 12 | CAGGCTGATGAGACTAAGGCGAATGCGACTCCGTGCTCTCTGGCCCTTGGCT<br>CCTTGTTG                                                                                                                                                        |

|                         |                                                |    |       |      |    |                                                                                                                                                                                                                                      |
|-------------------------|------------------------------------------------|----|-------|------|----|--------------------------------------------------------------------------------------------------------------------------------------------------------------------------------------------------------------------------------------|
| co3_91<br>13438_<br>x12 | CM0006<br>76.2/634<br>79272-<br>6347941<br>3   | 14 | 0.009 | 28.2 | 12 | GGCCTCTCTCCCATGGTGCTGTGGGTGGGGGAGGAGGGGTGCTTTTCTCCT<br>CAGCGAAGACTGGAGGCAGACATCACCCCTCAAGGATCATCCTCAGAAGTGC<br>CACGTGCTGGACAGCCTTGTTTTTCTACCTCACACATTT                                                                               |
| co3_91<br>15394_<br>x12 | ENST00<br>0005164<br>29.1                      | 14 | 0.008 | 28.2 | 12 | TTGCTCTGGGGATGCAAAAGAGGGAAATCCCTGCACTTCCTCTCTGTCTTTGT<br>GGCAGCC                                                                                                                                                                     |
| co3_91<br>15838_<br>x12 | AC09022<br>7.10/153<br>59-15277                | 20 | 2E-06 | 40.1 | 12 | UGGCCGAUGAUGACGAGACCACUGCGCAAUCUGAGUUCUGGGAACCAGGU<br>GAUGGAGUAUGUUCUGAGAACAGACUGAGGCCG                                                                                                                                              |
| co3_91<br>16030_<br>x12 | CM0006<br>81.2/499<br>49527-<br>4994931<br>6   | 15 | 0.008 | 30.2 | 12 | AAGATGACACTTTGAGGCATCGTGTCTATGGTTCATTACTACAGAAGCTTCTC<br>TGGATGTGTAAAGCACAGGAAACCAGGCAGAGGAGGCACAGGGTGCTCTCC<br>AGAACGAGAAGCCAGCTCCTGGAGTTGTTTGCTGCAACTGCCATTCCCCGTT<br>GATGACCATGCTCTTCCTTCAGAAGAGGGAGAGTGAGAGGACCAAGTCCAAG<br>TGGT |
| co3_91<br>20134_<br>x12 | CM0006<br>66.2/677<br>47236-<br>6774738<br>6   | 35 | 2E-05 | 38.2 | 12 | ATTTTCATGTTTTAAAGGCATAATGATGTCACTGACTGGCTGATGAAATCCCAA<br>GCGTAGGTAGTATGCTACATGAGGGGTGAGTTTTTTGCTAACACCACAAAGG<br>TCTCTGGCCAATGAGTGGAGTTTGATAGGAGTTCTTGTGACAAGT                                                                      |
| co3_91<br>24658_<br>x12 | CM0006<br>85.2/115<br>545637-<br>1155457<br>17 | 26 | 5E-05 | 36.2 | 12 | AGGGGTGGTCTCCTCCCTTACTCTTTGGGAACTCAGATTGGCCTTATGGTGG<br>CCTCTCTTTCCTTGAGGGGCACAACAGGT                                                                                                                                                |

|                         |                                              |    |        |      |    |                                                                                                                                                                                                                     |
|-------------------------|----------------------------------------------|----|--------|------|----|---------------------------------------------------------------------------------------------------------------------------------------------------------------------------------------------------------------------|
| co3_91<br>24898_<br>x12 | AJ22402<br>3.1/1-67                          | 32 | #####  | 63.9 | 12 | GUGCAUAUGAUGGAAAAGUUUUAAUCUCCUGACACUUGUGAUGUCUUCAAA<br>GGAACCACUGAUGCAC                                                                                                                                             |
| co3_91<br>34557_<br>x11 | ENST00<br>0004595<br>77.1                    | 44 | 3E-20  | 87.7 | 11 | TGGTCTCAAGGAAGGGATGATGTTCCAGTTGAGACTCAAGAAAAGGATTCTG<br>AGCCTCAG                                                                                                                                                    |
| co3_91<br>37021_<br>x11 | CM0006<br>66.2/541<br>47264-<br>5414746<br>1 | 22 | 0.009  | 28.2 | 11 | AAGACTCTACTTCCAGGTATAATTTCTATGGTTTATTACTGGAAAAGTTTCTCT<br>AAATATGTGGATCGCTGGAAATAAGAGGAAGCACAGGGTTCTCCGAGTGAAG<br>CTGGCTTTTGGAACTTACTTGGCTGCAACTGTCATTTGCTACTTTAAGATTTTAC<br>TTATTGATTTTTTTTTTTGAGACAGAGTCTCACTCTGT |
| co3_91<br>37285_<br>x11 | AL13270<br>9.5/1467<br>93-<br>146719         | 21 | #####  | 34.2 | 11 | UGGACCAAUGAUGACAAAUGGUGGCAUUGGAGUUAUGGACGAUGAAUGAU<br>AUGUGUCUGAAACUCUGAGGUCCAA                                                                                                                                     |
| co3_91<br>37505_<br>x11 | ENST00<br>0004592<br>55.1                    | 32 | 3E-13  | 63.9 | 11 | GCCACATGATGATATCAAGGCTGTTGTGATTGATTGGTTTGGCTAAGCCCAG<br>GGACCTT                                                                                                                                                     |
| co3_91<br>37582_<br>x11 | ENST00<br>0003654<br>05.1                    | 22 | 0.0001 | 36.2 | 11 | ATTGTTACATTGATAAAATCAAATCACCATCTTTTAGCTAAGCTTGTGCTGGAT<br>TTGCTT                                                                                                                                                    |
| co3_91<br>41520_<br>x11 | ENST00<br>0004592<br>29.1                    | 20 | 2E-06  | 40.1 | 11 | GCCCTGTGGTTGCTGGATGCTGTTGTGCATGGACAGCTCTCCAGTGGATTGCG<br>ATGGGCCA                                                                                                                                                   |

|                         |                                                |    |       |      |    |                                                                                                                                                   |
|-------------------------|------------------------------------------------|----|-------|------|----|---------------------------------------------------------------------------------------------------------------------------------------------------|
| co3_91<br>42312_<br>x11 | CM0006<br>71.2/872<br>60450-<br>8726058<br>5   | 43 | 0.007 | 30.2 | 11 | GTGCCCTTTTAAGGTAGACGCAGTTTCGTAAGAGGCTAACACATAAGGGTAAA<br>TTAAAGTAAGTCTCCATAAAACCCAGAGAAGAGACAGAAGAGACTGTGAAACT<br>CCTCTTTGGACCCCATCTGGAGCCACAGCA  |
| co3_91<br>43291_<br>x11 | ENST00<br>0003843<br>23.1                      | 45 | 8E-21 | 89.7 | 11 | TACCCCTTTTCACTTTGCCAGTTGGACTTATGTCTTTATTGGTCATTCAAGTG<br>GGCAA                                                                                    |
| co3_91<br>50980_<br>x11 | ENST00<br>0003840<br>49.1                      | 25 | 6E-09 | 50.1 | 11 | TGGTAATTACCAAGATTTTTAGAATGCAGTTTCTCATTTGCCAGGGAAATGAC<br>CATAAAA                                                                                  |
| co3_91<br>52289_<br>x11 | CM0006<br>64.2/231<br>455936-<br>2314558<br>00 | 26 | ##### | 52   | 11 | GTCCTTCTCATTGAGCTCCTTTCTGTCTATCAGTGGCAGTTTATGGATTCGCAC<br>GAGAAGAAGAGAGAATTCACAGAAGTAGCATTATTTACCTTCTGTCTTTACA<br>GAGGTATATTTAGCTGTATTGTGAGACATTC |
| co3_91<br>53070_<br>x11 | AK12399<br>3.1/1023-<br>1100                   | 29 | 2E-11 | 58   | 11 | CUGAGCUGAGGAUGAUUUAAAGUUUAUCCUGUCUGAAAUGGUAUCUUUUG<br>UGAGGAGGUCUGACUUGCUGAGGCUCAG                                                                |
| co3_91<br>55083_<br>x11 | ENST00<br>0003910<br>61.1                      | 19 | 1E-05 | 38.2 | 11 | TGCGTGACATGTATGTTTTTGTTTAACTTGTATACAAAGGCTTATGGATAGGTG<br>CAAAAA                                                                                  |
| co3_91<br>56491_<br>x11 | ENST00<br>0003643<br>75.1                      | 32 | 2E-08 | 48.1 | 11 | AGGTTATTTCAAAGAGGGCTCATGAGGCTATGAAACCAAGAAGACTCTTAATGCT<br>ATGACCA                                                                                |
| co3_91<br>60836_<br>x11 | ENST00<br>0003650<br>28.1                      | 28 | 1E-08 | 48.1 | 11 | TTTAGAATGTCAAAATTGATTTTGTAAATAGTCAGGACAGGATAAACAGTCGCTA<br>TATTAA                                                                                 |

|                         |                                              |    |       |      |    |                                                                                                                                                                                                |
|-------------------------|----------------------------------------------|----|-------|------|----|------------------------------------------------------------------------------------------------------------------------------------------------------------------------------------------------|
| co3_91<br>62243_<br>x10 | AC13219<br>2.3/7195<br>4-71776               | 23 | ##### | 46.1 | 10 | GUAAUGUGUGCAUAGGUUUCaucugugucugguagcagugucugucugug<br>UUUUUCAUUCAGAUUCUUGCUAUCCACACAAACAUCAUGCGGCCAAAGAGUA<br>ACUUGGGAUCAUAGUACUGGUCUAGUGUUGUCUCUGGACACAUCUACCAC<br>UGCCAGCCUCCAAAUUCCACACACAG |
| co3_91<br>64963_<br>x10 | ENST00<br>0006096<br>20.2                    | 23 | 1E-07 | 46.1 | 10 | TAGAGAAGTCAATGATGGTTTTATTCATATCGTCTGAACCTGTCTGAAGCATCT<br>CAGTGA                                                                                                                               |
| co3_91<br>66233_<br>x10 | ENST00<br>0003641<br>21.1                    | 16 | 0.002 | 32.2 | 10 | AGGTCATTTCAAAGAGGCTGCAAAACCAAGAGCTCTTAACGCTGTGAGCAAA<br>GATGGAAG                                                                                                                               |
| co3_91<br>67533_<br>x10 | ENST00<br>0004081<br>75.1                    | 44 | 3E-20 | 87.7 | 10 | GGGGTGTGCTCAGAGCAGGGGGCCCGAAGAATGCCTCCTCTGTTTACAACA<br>CACCCAATA                                                                                                                               |
| co3_91<br>68053_<br>x10 | ENST00<br>0003634<br>85.1                    | 31 | 0.004 | 30.2 | 10 | TTATGAATATACTCACCGTTTTGATTTTATAATAGTAACGACAAGCTAAACATT<br>CACTAT                                                                                                                               |
| co3_91<br>68683_<br>x10 | CM0006<br>71.2/339<br>34376-<br>3393429<br>6 | 28 | ##### | 56   | 10 | CTGGAAAAGACAATGATGTTTTATTTCCAAGCACATATCTGAGTTGTATGTGTG<br>GACAGCACTGAGACTGAGTCTTTCCAC                                                                                                          |
| co3_91<br>73043_<br>x10 | ENST00<br>0004587<br>90.1                    | 21 | 5E-07 | 42.1 | 10 | AGCCTTTGTGTTGCCATTCACTTTGGAACTAGTGAATGTGGTGTCAAAAA<br>GGCGTAA                                                                                                                                  |
| co3_91<br>73573_<br>x10 | ENST00<br>0003645<br>97.1                    | 23 | 0.003 | 30.2 | 10 | GGCGGCCCTTATCACAGCTGCAGCTGCTTCCACATAGCTGCTGCGGTCAAAA<br>AGGAGCCC                                                                                                                               |

|                         |                                                |    |       |      |    |                                                                                                                                                   |
|-------------------------|------------------------------------------------|----|-------|------|----|---------------------------------------------------------------------------------------------------------------------------------------------------|
| co3_91<br>84223_<br>x10 | ENST00<br>0005159<br>26.1                      | 24 | ##### | 32.2 | 10 | AAAATATATTTTAGTTTGTGGGCTGGGAAACCAAGAGCTCTTAATGCTATACC<br>CAAAGAC                                                                                  |
| co3_91<br>89173_<br>x10 | CM0006<br>63.2/155<br>42165-<br>1554230<br>4   | 14 | 0.009 | 28.2 | 10 | TGGCTCGGTTTCCTGGGGGTGGGCTCAGTCTACACCACCTCCCCTCAGCC<br>AAGCCTACAGTAGAGGGCCAGGCATCCTCCCGTATGGGAGAGGCGTTTGA<br>GTAAGGAGCCTCACCTGGGGTGTCTAGCCTCACATTT |
| co3_91<br>91123_<br>x10 | ENST00<br>0003860<br>62.1                      | 20 | 2E-06 | 40.1 | 10 | AATAAGTGATGAAAAAAGTTTCGGTCCCAGATGATGGCCAGTGATAACAACAT<br>TTTTCTG                                                                                  |
| co3_91<br>96843_<br>x10 | ENST00<br>0003842<br>89.1                      | 23 | 4E-08 | 46.1 | 10 | TTCCAAAGTGTTGAGTTCAGTCCAGGGCAGCTTCCCTGTTCTGTTAATTAAC<br>TTTGGGA                                                                                   |
| co3_91<br>97403_<br>x10 | ENST00<br>0003649<br>15.1                      | 26 | 2E-09 | 52   | 10 | GCCAAATGATGTTTATTTGAAACAGGAGCACCTCAGTGCAAGGACGACTCTTA<br>TCTATCA                                                                                  |
| co3_92<br>03940_<br>x9  | ENST00<br>0003623<br>96.1                      | 21 | 5E-07 | 42.1 | 9  | ACCTGCATTCAAAAATGATCACGGGCTGCCTGTGCTCTGGTCATCAATAACGC<br>AGGGAGA                                                                                  |
| co3_92<br>04480_<br>x9  | CM0006<br>64.2/215<br>302766-<br>2153028<br>64 | 19 | 0.003 | 30.2 | 9  | ATCCTTTTGCAGTTCATAAGCATGAAGTTTGGGTTTTTCACATGCATCTGTGAG<br>AAATACCTTCTCAAACCCTGTTACAATGGTGGCTCACATCTGTAA                                           |
| co3_92<br>07729_<br>x9  | CM0006<br>81.2/178<br>62588-<br>1786272<br>0   | 25 | 3E-09 | 50.1 | 9  | ATTGCACCTAAACCCAAGAATCACTGTTTCTTATAGCGGTGGTTTAAACAGAG<br>GTGCAAACAGCAAGCGGATCTTGTGCGCCTTTGGGGGGCTGTGGCCGTGCC<br>CTCAAAGTGAATTTGGAGGTTCCACAAC      |

|                        |                                              |    |        |      |   |                                                                                                                       |
|------------------------|----------------------------------------------|----|--------|------|---|-----------------------------------------------------------------------------------------------------------------------|
| co3_92<br>09862_<br>x9 | ENST00<br>0003844<br>18.1                    | 15 | #####  | 30.2 | 9 | GCCCGCCTTGGCCTCCCAAAGTGCTGGGATTCTTACATCGACTGCATAGAAA<br>GAGGAGAG                                                      |
| co3_92<br>10933_<br>x9 | ENST00<br>0003650<br>32.1                    | 15 | 0.003  | 30.2 | 9 | GCCTGCATTCGTAAGTGATCACGGGCTGCCCGTGTCTGCTGATTCATTGGTAGTG<br>CAGGCAGA                                                   |
| co3_92<br>16126_<br>x9 | ENST00<br>0003844<br>37.1                    | 27 | 2E-10  | 54   | 9 | ATTGCACCTAAACCCAAGAATCACTGTTTCTTATAGCGGTGGTTTAAACAGAG<br>GTGCAA                                                       |
| co3_92<br>18727_<br>x9 | ENST00<br>0003636<br>64.1                    | 30 | 4E-12  | 60   | 9 | AAGCCAGCCAATGAATCTGCTTACCTGATTGTGTTTGTGCAGACATACTTTAA<br>AAACTGG                                                      |
| co3_92<br>20014_<br>x9 | ENST00<br>0003624<br>23.1                    | 23 | #####  | 46.1 | 9 | CCCCTTTTAAAAGCACTCAATGGGCCTGTGGCTAATGACCTATTGAGCCGTCA<br>AGAAAGG                                                      |
| co3_92<br>23803_<br>x9 | AC06483<br>6.7/1684<br>2-16926               | 36 | 1E-15  | 71.9 | 9 | UUCAUGUUGUCAUUGAUGCAUUCUUAUUGGAACUGAAUUUAAGUGAUCUG<br>ACUCAUUCGUCACUACCACUGAGACAACAUUGAG                              |
| co3_92<br>26413_<br>x9 | CM0006<br>77.2/463<br>51745-<br>4635166<br>2 | 28 | 0.0008 | 32.2 | 9 | TGATTCAACTATGATTTTTATTTGTTTGACTGATTTCTTTTGGATAATGAAGGT<br>ATCTTTAGTCACCATATCTTCTGAGACAT                               |
| co3_92<br>27016_<br>x9 | CM0006<br>75.2/724<br>60628-<br>7246051<br>9 | 18 | 5E-05  | 36.2 | 9 | CAGTCACCATTGTTTGTCAATTATTTCTTCACAATGTCTATTGAAGGATCTCAT<br>CACCTTTAGAGAGCTGTGGTCATGCCCTTAAAGTGAATTTGGAGGTTTTATA<br>CCC |
| co3_92<br>31264_<br>x9 | ENST00<br>0003910<br>76.1                    | 14 | 0.009  | 28.2 | 9 | ATGTAATAATGTTTCATCAAATGTCTGACCTGAAATGAGCATGTAGACAAGTTAA<br>TTTAAC                                                     |

|                        |                                      |    |       |      |   |                                                                               |
|------------------------|--------------------------------------|----|-------|------|---|-------------------------------------------------------------------------------|
| co3_92<br>33658_<br>x9 | ENST00<br>0003643<br>59.1            | 27 | 0.006 | 30.2 | 9 | AGGTTGGATTCAATTGTTACAATATAGCTGTGAAGTGCTATGTTGTCCTTGCCC<br>CCTGCTC             |
| co3_92<br>36646_<br>x9 | ENST00<br>0003639<br>46.1            | 22 | 1E-07 | 44.1 | 9 | TCCTCCTACAAAGGCGTGTCTGTGGTTCCCTGTCTTTGGACACGTAAGAATTG<br>GAGGAAA              |
| co3_92<br>45202_<br>x8 | AL13270<br>9.5/1759<br>50-<br>175879 | 27 | 5E-08 | 46.1 | 8 | UGGAUCAAUUGAUGAGUACCCUGGGGUGUCUGAAUCUUGGAUUUUGAUUAA<br>ACCCUAUAACUCUGAGGUCCAU |
| co3_92<br>51626_<br>x8 | ENST00<br>0004135<br>22.1            | 24 | 2E-08 | 48.1 | 8 | CCACAATGATGGCAATATTTTTTCGTCAACAGCAGTTCACCTAGTGAGTGTTGA<br>GACTCTG             |
| co3_92<br>55754_<br>x8 | ENST00<br>0003843<br>90.1            | 30 | 4E-12 | 60   | 8 | TCGCTATGATGATGGATTCCAAAACCATTTCGTAGTTTCCACCAGAAAGTCTTA<br>TGTTGGC             |
| co3_92<br>56562_<br>x8 | ENST00<br>0003908<br>32.1            | 20 | 5E-06 | 40.1 | 8 | TACACTTGTTTATATTTTTGTTAACTTGTGGACAAAGATTTATAGACAGGTGC<br>AAAAAA               |
| co3_92<br>59138_<br>x8 | ENST00<br>0004593<br>86.1            | 28 | 3E-08 | 48.1 | 8 | GTCCAGAAAACAATGATGTGGTAATTTCCAAGCACATATCTGATGATTCCATG<br>TGGAATT              |
| co3_92<br>62202_<br>x8 | ENST00<br>0004081<br>13.2            | 20 | 2E-06 | 40.1 | 8 | AAGACTATACTTTCAGGGATCATTTATATGATTTGTGGCTACAGAAGTTTCTCA<br>GCGTGA              |
| co3_92<br>65122_<br>x8 | ENST00<br>0003844<br>16.1            | 23 | ##### | 46.1 | 8 | GTTGAGGTCTATCCCGATGGGGCTTTTCCTGTAGCCTGCACATCGTTGGAAA<br>CGCCTCAT              |
| co3_92<br>72914_<br>x8 | ENST00<br>0003841<br>70.1            | 27 | 2E-10 | 54   | 8 | TAGCAAGCCTCCAGCGTGCTTGGGTCTGCAGTGACCCCGTGGATTCCCTACAG<br>GGCTTGCC             |
| co3_92<br>75218_<br>x8 | ENST00<br>0003649<br>68.1            | 24 | 1E-08 | 48.1 | 8 | ACAAGCCTATGATGGTTAGTTATCCCTGTCTGAAAATCTGGACTGAGGGAAAT<br>AATCTAT              |

|                        |                                                |    |       |      |   |                                                                                                                                                            |
|------------------------|------------------------------------------------|----|-------|------|---|------------------------------------------------------------------------------------------------------------------------------------------------------------|
| co3_92<br>75418_<br>x8 | CM0006<br>72.2/100<br>237302-<br>1002371<br>56 | 33 | ##### | 65.9 | 8 | AGTTGTGGTGGTTTTCTTTTTGGCACATTTGTTAAGTTTTCAAATGGGCCTAAC<br>TCTGCCACATATATAATATCGGAGATGGCAAAGGCTTGTGACGGAGATATCTC<br>TCTTAAGCCTTTCTGCATCAGAGAATGGCTCCCACATGT |
| co3_92<br>76242_<br>x8 | ENST00<br>0003656<br>33.1                      | 14 | 0.009 | 28.2 | 8 | TGGCGTCCATGATGTTCCGCAACTACCTACATTGTTTGATCCTCATGAAAGCA<br>GCACTGG                                                                                           |
| co3_92<br>77018_<br>x8 | AL13270<br>9.5/1851<br>08-<br>185034           | 32 | 0.001 | 32.2 | 8 | UGGACCAAUGAUGAGUACCAUGGGGUAUCUGAAACAGGAUUUUUGAUUAAA<br>CCCAUUGCAAUUCUGAGGUCCAU                                                                             |
| co3_92<br>81126_<br>x7 | CM0006<br>67.2/172<br>252478-<br>1722523<br>34 | 17 | ##### | 34.2 | 7 | CCTCGCTTTCTTTGCAGGGAGCAGGTATGTATGTTCCCTATTATGTCTGGAGG<br>CAGAGGGAAAAGGCTTCAGTCCCCTGGGCATCATGTCTTTGGTGCCGCTGGC<br>TTCCTGTCTGCCAATTCTATCCTCAAGCACTGGGACACAG  |
| co3_92<br>81616_<br>x7 | AL13270<br>9.5/1517<br>20-<br>151647           | 14 | 0.008 | 28.2 | 7 | UGGACCAGUGAUGACCACUGGUGGCAUAUGAGUCAUACACAUGAACACCAU<br>GUUUCUAGAACUCUGAGGUCCAA                                                                             |
| co3_92<br>83954_<br>x7 | BC04266<br>7.1/532-<br>663                     | 33 | 8E-14 | 65.9 | 7 | ACUGCCCCUAGAGGCGUUGCAGCUGUGGCUGCCGUGUCACAUCUGUGUCA<br>UUAAGUGGCAGAGAUUAGAGAGGCCUAUGUCUACGCUCAGCGUUCUGCCCC<br>GUGAACGUUUUGAAUGUUUGAUAGUCUCACACU             |

|                        |                                              |    |       |      |   |                                                                                                                                                             |
|------------------------|----------------------------------------------|----|-------|------|---|-------------------------------------------------------------------------------------------------------------------------------------------------------------|
| co3_92<br>84514_<br>x7 | AY34959<br>7.1/1-142                         | 27 | ##### | 54   | 7 | UUGCCCGAUGAUUUAUAAAAAGACGCGUUUUAUUAAGAGGACUUUAUGCUGGAG<br>UUCUUGACGUUUUUCUCUCUUUUUCUAUACUUCUUUUUCUUUCUUUGAAUG<br>UCCAGCGUCCUGUGAGCGAAGAUUAUGAGAUUAUGAGGGCAA |
| co3_92<br>85256_<br>x7 | ENST00<br>0003654<br>00.1                    | 33 | ##### | 65.9 | 7 | TGGACCAATGATGACAAATACCGGCGTATGAGTCTTGGATGATGAATAATACG<br>TGTCTGG                                                                                            |
| co3_92<br>89211_<br>x7 | CM0006<br>77.2/250<br>99499-<br>2509959<br>4 | 29 | 2E-11 | 58   | 7 | GGATCGATGATGACTATAAAAAAATGGATCTCATCGGAATCTGAACAAAATG<br>AGTGACCAAATCATTCTGTGCCACTTCTGTGAGCTGAGGTCC                                                          |
| co3_92<br>90947_<br>x7 | ENST00<br>0003909<br>47.2                    | 15 | ##### | 30.2 | 7 | CCCAAAGTGCTGGGATAACCCTTACCTGTTTCTCCTTTGCAGGGCAGATAGAA<br>CATGATA                                                                                            |
| co3_92<br>95329_<br>x7 | ENST00<br>0004588<br>92.1                    | 24 | 1E-08 | 48.1 | 7 | TGGCAACTGTGATGAAAGATTTGGTCTGTATGTAATAGATTTTATTACTAAATG<br>AGGACA                                                                                            |
| co3_92<br>98612_<br>x7 | ENST00<br>0003910<br>75.1                    | 27 | 3E-05 | 38.2 | 7 | GTAGGTGACGACCAATATTTTTTTTACTTTGACTTGATGTCTATTGAAGAAATC<br>TAGCAT                                                                                            |
| co3_93<br>04310_<br>x7 | AL13270<br>9.5/1568<br>19-<br>156747         | 27 | 0.004 | 30.2 | 7 | UUGAUGAUUAUGAUGGCCACUGGUGGCUUAUGAGUCUUAUACAGUGAAUAC<br>AUGUUUGAAACUCUGAGGUCUGU                                                                              |

|                        |                                              |    |       |      |   |                                                                                                                                                              |
|------------------------|----------------------------------------------|----|-------|------|---|--------------------------------------------------------------------------------------------------------------------------------------------------------------|
| co3_93<br>05304_<br>x7 | AC07314<br>9.5/3872<br>3-38590               | 19 | 0.002 | 30.2 | 7 | UGUUCUGACAUGGGAAGAGUAGCUUCUGGUUGGUGGAGCCCAUCUCACAU<br>UAGCCAGAGACAAAGCAACACCUUGUUUAUCCCGGCUUGGCUUUUGGCCU<br>GUGUCCAUGACUGGUCCAUAACCUUGGACACAUGG              |
| co3_93<br>16049_<br>x7 | CM0006<br>67.2/407<br>90204-<br>4079007<br>1 | 23 | 1E-05 | 38.2 | 7 | CCTCCTTTTCTTGTCAGGGACTGAGTGTGTGGTCCTGCTCCTGTTATGTATGG<br>AGGCAAAGGGAAAGGGCTCCGGCCCCCTCAAATCATGTCTTTGGTGCCAGC<br>CGGTTCTGTTCTCAGTCACCTGGATACTG                |
| co3_93<br>16056_<br>x7 | AC01211<br>9.8/9287<br>5-93023               | 15 | 0.008 | 30.2 | 7 | AUCCAAGGGGAUUCCUCUCCAAGGGAACAUGCAGUGCCCCUCUCAGGAA<br>AGUAACAACCUUGGAAUAGAAUCUGGCAUGCCUAAGGUCUUUGAGGAAUAGA<br>GGAAUAGAGGAUGCUUGUUUCCUCUGCCUUCUUGGCUGCCUACAUGG |
| co3_93<br>18023_<br>x7 | ENST00<br>0003649<br>40.1                    | 20 | 2E-06 | 40.1 | 7 | TGGTCAGGTGGAATAATCCTTATCTGTTTCTCCTTTTGAAGGGCAGATTAGAA<br>CATGATA                                                                                             |
| co3_93<br>34618_<br>x6 | ENST00<br>0003647<br>96.1                    | 32 | 7E-06 | 40.1 | 6 | CAGCCTCTGATGAAATTTATCTTGATAGGGACATCTGAAAGTGTTGATGAATG<br>CCAAGGA                                                                                             |
| co3_93<br>35122_<br>x6 | ENST00<br>0003839<br>53.1                    | 20 | 2E-06 | 40.1 | 6 | GCTGAATGATGATATCCCACTAACTGAGCAGTCAGTAGTTGGTCCTTTGGTTG<br>CATATGA                                                                                             |
| co3_93<br>36022_<br>x6 | ENST00<br>0003644<br>46.1                    | 40 | 7E-06 | 40.1 | 6 | AATCTCCTGGGATTGTGTCTGGCGAGTGCCCAGTATTCTGCCACCTTCAGAA<br>GGAAGGGA                                                                                             |

|                        |                                              |    |       |      |   |                                                                                                                                                    |
|------------------------|----------------------------------------------|----|-------|------|---|----------------------------------------------------------------------------------------------------------------------------------------------------|
| co3_93<br>36298_<br>x6 | ENST00<br>0003909<br>94.1                    | 38 | 1E-16 | 75.8 | 6 | AGCTTATCAGTGATGTTGTAAAAATAAATGTCTGAACATATGAATGCAGTATTG<br>ATTTCA                                                                                   |
| co3_93<br>36682_<br>x6 | AC09658<br>7.1/2586<br>4-25727               | 29 | ##### | 42.1 | 6 | GCUAUCCUGGACUUGCCAGCCCAUAGACACAGUUGCUGUGCUGGCCUG<br>UACUUAUUGGAGCAAAGAAAAAGUGGCUAUUUCUAUGCUCAGUGUUCACAAA<br>CCAGUGAGCACUAAGAAUGGUUUUAUAGCCUGACAUUU |
| co3_93<br>56458_<br>x6 | ENST00<br>0003635<br>24.1                    | 39 | 1E-07 | 46.1 | 6 | CCCTCCTACAAAGGCATGTCTATAGTTCCTTGTCTTTGGACATGTAAGAATTG<br>GAGGCAA                                                                                   |
| co3_93<br>61264_<br>x6 | CM0006<br>79.2/763<br>24196-<br>7632429<br>9 | 15 | 0.006 | 30.2 | 6 | ATCATTGTTGTAGTTCATAAGTGTGATCATTGGGTGTTACGCTTACATGTGAGA<br>TGTGCCATCCTTGAACCTTGTTAGAACATCAGTACATCACCTGGCTGACA                                       |
| co3_93<br>61276_<br>x6 | ENST00<br>0004591<br>57.1                    | 21 | ##### | 42.1 | 6 | ATCCTTTTGTAGTTCATGAGCGTGATGATTGGGTGTTACATGCATGTGTGAG<br>ATGTGCC                                                                                    |
| co3_93<br>62182_<br>x6 | ENST00<br>0003646<br>46.1                    | 21 | 5E-07 | 42.1 | 6 | GCCCTCCTGGTGCTTACCACAGGCTGTGTTCTTACACTGACTGTATAGAATGA<br>GAAGGTA                                                                                   |
| co3_93<br>62518_<br>x6 | ENST00<br>0003844<br>23.1                    | 21 | 5E-07 | 42.1 | 6 | ATCCAAGGTGATTCCCTCTCCAAGGGGACATCAGTGCCTCTCAGGAAAGTAG<br>CAGCTTGG                                                                                   |
| co3_93<br>62698_<br>x6 | ENST00<br>0003627<br>05.1                    | 14 | 0.008 | 28.2 | 6 | TGGACCTATGATGATGACTGGTGGCGTATGAGTCATTGACGGTGAATACAGG<br>TCTGGAAG                                                                                   |

|                        |                                      |    |       |      |   |                                                                                                                                            |
|------------------------|--------------------------------------|----|-------|------|---|--------------------------------------------------------------------------------------------------------------------------------------------|
| co3_93<br>64714_<br>x6 | AC02210<br>7.8/6626<br>6-66397       | 20 | ##### | 32.2 | 6 | GCGCUGCCUUUGUACCCACCGUGCCUCCGCCUGGUGUCUGGGGUCAGG<br>UUGCAGUGCCAGAGCACGUGCUUGCGCAUAAAUGGGGCAGCCUGGCCCCC<br>UGCGGAUGGUCCUUUUAACCGCGAGCAACAAG |
| co3_93<br>64726_<br>x6 | ENST00<br>0005161<br>31.1            | 22 | 1E-07 | 44.1 | 6 | GCCAGGTACCATGCAAAAGCAATCTTCCCTTTAGAATGACTGATGGTATGCTA<br>AGGTTTT                                                                           |
| co3_93<br>65254_<br>x6 | ENST00<br>0005172<br>58.1            | 14 | 0.009 | 28.2 | 6 | GACTAGTACCACCTCACACCCGCAGAGCACTGGGCCCTGCCTGGGGTGAAA<br>TGCCAGTTG                                                                           |
| co3_93<br>67948_<br>x6 | ENST00<br>0006201<br>04.1            | 19 | 0.003 | 30.2 | 6 | AAAAAAGTGTCTTGAGCTTTCTGTCTGATTGTGGCAGCCAAGATTGAATAG<br>AGGA                                                                                |
| co3_93<br>70636_<br>x6 | ENST00<br>0005171<br>11.1            | 28 | 0.001 | 32.2 | 6 | ATGCATCTATCTGACATGCCTGGAGCAGGTATTGTCTGCTGCTAAAGTTTCCA<br>CCACAGA                                                                           |
| co3_93<br>71074_<br>x6 | AL13270<br>9.5/1834<br>12-<br>183335 | 20 | ##### | 40.1 | 6 | UGGAUCAAUGAUGAGUAUUGGUGGAGGUGUCUGAAUCAACACUUUUGAUU<br>AAGCCCUCUGUGUAACUCUGAGAUCUGU                                                         |
| co3_93<br>71464_<br>x6 | ENST00<br>0006306<br>15.1            | 51 | 3E-24 | 101  | 6 | TCCTGTGTGAGAAATGATGAGGGTCAACATTCTTCATACCAAAGTGAAGACAT<br>GAGATCC                                                                           |
| co3_93<br>72352_<br>x6 | ENST00<br>0003838<br>95.1            | 20 | 2E-06 | 40.1 | 6 | AAAGCAGGTTGCAATTACAGTGCTTCATTTTGTGGAAGTACTGCCATTATCCT<br>GCTGAAA                                                                           |
| co3_93<br>75160_<br>x6 | ENST00<br>0004595<br>07.1            | 18 | 0.008 | 28.2 | 6 | ATCCTGTTGTAGCTCATGAGCGTGATAATTGGGTGTTTCATGTGCGTGTGTGAG<br>ATGTGCC                                                                          |

|                        |                                              |    |       |      |   |                                                                                                                                               |
|------------------------|----------------------------------------------|----|-------|------|---|-----------------------------------------------------------------------------------------------------------------------------------------------|
| co3_93<br>79893_<br>x5 | ENST00<br>0005172<br>38.1                    | 22 | 0.009 | 28.2 | 5 | CAAAGTTCTGGAATTACAGGTGTGAGCCACCGTGCCAGCATTAAATTTTA<br>ATATGTA                                                                                 |
| co3_93<br>83978_<br>x5 | CM0006<br>76.2/698<br>04331-<br>6980420<br>3 | 30 | 3E-07 | 44.1 | 5 | AGGGTTTGCCTTAGGGCAGGGAGGTTGAAGAGTGGCTCCTCTGTTTACAATAC<br>ACCAAACAGGAATCTGGGGTCATTGTGACAAGGGGGCACAAAACCTTGTGTCCT<br>CCCTACATGTGAAAAAAAAAAAAAGA |
| co3_93<br>84153_<br>x5 | ENST00<br>0003847<br>13.1                    | 19 | ##### | 30.2 | 5 | CTACAATCATGGCAATATTTTTTGTCAACAGCGGTTACCTAGTGAATGTTGAT<br>ACTTTG                                                                               |
| co3_93<br>86608_<br>x5 | ADDF01<br>1338994.<br>1/3988-<br>3917        | 15 | 0.004 | 30.2 | 5 | UGGGCAUGUGAUGUGACCUUCCUGAGCCUGCAUUCCUCACCUUGGAAAUG<br>AUGAGCAGUUACUGAUGCCACA                                                                  |
| co3_93<br>88683_<br>x5 | CM0006<br>77.2/643<br>42566-<br>6434269<br>8 | 14 | 0.008 | 28.2 | 5 | TGTTACTCTCTAGCTTAAGAACCTTTAATGTGGTGATGTCCATCTCATGTCATC<br>CAGGGATAAAGCAACCCTTGTTTATCCCATCTTGGCTCTTGGTCTGTGCCAT<br>GGCTGGTTCGTGCCTTGGATACATGG  |
| co3_93<br>89253_<br>x5 | AB02889<br>3.1/1092<br>0-11006               | 44 | ##### | 87.7 | 5 | GGCAGAUGAUGUUUGUUUUCACGAUGGUCUUCAGAUGCCCACGUGGGCAC<br>UGCUGAGAAAGCCACUUGGUAAAACUGAUGCCGAAA                                                    |
| co3_93<br>90878_<br>x5 | ENST00<br>0003847<br>56.1                    | 16 | 0.001 | 32.2 | 5 | TCCCAATGAAGAACTTTACATGTCTTACTCTCTGTCCTAGTCCCAGAGCCT<br>GTAAAGG                                                                                |

|                        |                                              |    |        |      |   |                                                                                                                           |
|------------------------|----------------------------------------------|----|--------|------|---|---------------------------------------------------------------------------------------------------------------------------|
| co3_93<br>91998_<br>x5 | AC11508<br>8.6/1230<br>21-<br>122911         | 20 | 2E-06  | 40.1 | 5 | UGUGAGAGUGAUGAGUUUGCACACUGGUGGAGCCAUGGUUAUCAGGUGAUAC<br>AGGCACCACUCAGUAUCACCCUGGUGACAAAAUCAAGUGCACAGGGGCCAU<br>CUGACUCACA |
| co3_93<br>92073_<br>x5 | CM0006<br>75.2/565<br>59624-<br>5655972<br>5 | 15 | #####  | 30.2 | 5 | ATCCATTTGTAGTTCAGAAACATGACTATTGTCTTTTCAAGCTTATATGAGATC<br>TGGCTCCCTCAATCCTTGCTATGATATCAGTACATTACCTGTCTGATG                |
| co3_93<br>93508_<br>x5 | AF14134<br>6.1/1275-<br>1356                 | 25 | 3E-09  | 50.1 | 5 | UGCCACAAUGAUGACAGUUUUAUUUGCUACUCUUGAGUGCUAGAAUGAUGA<br>GGAUCUUAACCACCAUUUAUCUUAACUGAGGCA                                  |
| co3_93<br>93713_<br>x5 | ENST00<br>0003647<br>29.1                    | 25 | #####  | 34.2 | 5 | TCCTGCATCCGAAAGTGATCATAGGCTGCCTGTGCCTAGGTCATTGATAGTG<br>CAGGGAGA                                                          |
| co3_93<br>94568_<br>x5 | ENST00<br>0003645<br>33.1                    | 21 | 0.0005 | 34.2 | 5 | TCACTGTGATGATGGTTTTCCAACATTCGCAGTTTCCACCAGAAAGGTTTTCC<br>TTAGTGT                                                          |
| co3_93<br>95428_<br>x5 | ENST00<br>0004085<br>69.2                    | 18 | 0.008  | 28.2 | 5 | TTGTATTTTTTTGTAGAGATGGGGTCTCTCCCATGGGCACAGTCTCATTGTTTCT<br>ATAGTT                                                         |
| co3_93<br>95698_<br>x5 | ENST00<br>0006072<br>61.1                    | 22 | 3E-07  | 44.1 | 5 | TGGATCAATGATGAGTATTGGTGGAGGTGTCTGAATCAACACTTTTGATTAAG<br>CCCTCTG                                                          |
| co3_93<br>97198_<br>x5 | CM0006<br>63.2/285<br>78822-<br>2857874<br>9 | 35 | 5E-15  | 69.9 | 5 | ACTGGTCCAGGATGAAACCTAATTTGAGTGGACATCCATGGATGAGAAATGC<br>GGATATGGGACTGAGACCAGCT                                            |
| co3_93<br>98613_<br>x5 | ENST00<br>0003913<br>06.1                    | 18 | 0.009  | 28.2 | 5 | TGAACTTTAAAATGCAAGTTCATAGTTCTTTAAGAGACTAACACAGAAAGCTAA<br>AGTAAT                                                          |

|                        |                                                |    |        |      |   |                                                                                                                                          |
|------------------------|------------------------------------------------|----|--------|------|---|------------------------------------------------------------------------------------------------------------------------------------------|
| co3_94<br>02158_<br>x5 | ENST00<br>0005166<br>29.1                      | 31 | 0.008  | 30.2 | 5 | GAGCAGTTTGGCATATGTTCTGAATCTGAGGTTGATTATTATTCCTTTAGCGCT<br>AGTATT                                                                         |
| co3_94<br>02793_<br>x5 | CM0006<br>64.2/276<br>42169-<br>2764204<br>3   | 14 | 0.009  | 28.2 | 5 | TTCTAAAGTGTTGAGTTCAGTCCAGGGTGGATCCCCTGCTCTGTTAATTGAAC<br>TGGAACATTTAAACTGGCTAGGCAAAATGCCTACATAGAAAGCATTACTCTTT<br>ATTCATCCCCAGCCTACAAAA  |
| co3_94<br>05003_<br>x5 | ENST00<br>0003908<br>59.1                      | 22 | 2E-07  | 44.1 | 5 | GGATTTATAATGAGCTGTGTTTACTGAGCATTATGAAGTAAAGTTCAATATGAT<br>TACTCT                                                                         |
| co3_94<br>06833_<br>x5 | ENST00<br>0003869<br>67.1                      | 18 | 5E-05  | 36.2 | 5 | TGGGAAGTGATGACACCTGTGACTGTTGATGTGGAAGTATTATCGCGTATT<br>CGTACTG                                                                           |
| co3_94<br>08028_<br>x5 | CM0006<br>65.2/183<br>453814-<br>1834539<br>44 | 23 | #####  | 30.2 | 5 | AGGCAGGATCTAGTTACATTGTAGCTGTGAAGTGCTGCATTGTCTTTGCCCC<br>TGCTCAAATAAACTGTTACCTTTCAAGCCCTGTCTGCCATGGTGCTGTAGC<br>AGCAGGGATGTTTGGTCTCATACAT |
| co3_94<br>10823_<br>x5 | ENST00<br>0005168<br>83.1                      | 30 | 0.0001 | 36.2 | 5 | TGTCAAAAATCCCCAATCCTATTTCTGACACTTCATATGAAAGCTGCATGTGC<br>AGTCTT                                                                          |
| co3_94<br>19098_<br>x5 | ENST00<br>0005799<br>95.1                      | 28 | #####  | 40.1 | 5 | AACTATTGAGAACAAAGATGCAACATACCACTCGAGTGTGCAGTGGGGAAGC<br>CAACCTTG                                                                         |
| co3_94<br>19168_<br>x5 | ENST00<br>0003910<br>89.1                      | 31 | 0.005  | 30.2 | 5 | TGTTCTGACATGGGAAGAGTAGCTTCTGGTTGGTGGAGCCCATCTCACATTA<br>GCCAGAGA                                                                         |

|                        |                           |    |        |      |   |                                                                   |
|------------------------|---------------------------|----|--------|------|---|-------------------------------------------------------------------|
| co3_94<br>20933_<br>x5 | ENST00<br>0004595<br>38.1 | 26 | 8E-10  | 52   | 5 | ACCCCTGGCAGCCCCTCCTGATGATTCTTCTTCCTGAGCACGCTCATGATGA<br>GCAAACCTG |
| co3_94<br>27308_<br>x5 | ENST00<br>0003646<br>30.1 | 31 | 1E-07  | 46.1 | 5 | TGGACCAATGATGATGACTGGTGGTGTATGAGTTAAAGGTGATGAATAGTAAG<br>TGTCITT  |
| co3_94<br>34063_<br>x5 | ENST00<br>0003844<br>42.1 | 24 | 0.0006 | 32.2 | 5 | GGCTTGCTGGTGCTTACCACAGGCTGAATTCTTACACTGACTATATAGAAAAG<br>GAGGTAG  |
| co3_94<br>35718_<br>x5 | ENST00<br>0003630<br>91.1 | 27 | 3E-05  | 38.2 | 5 | CTGAGTCCATGATGATTTCAAGTTATCCCTGTCTGAAGGCAAAGAAAGGCCTT<br>TCTGTGT  |
| co3_94<br>37178_<br>x5 | ENST00<br>0003845<br>04.1 | 24 | 1E-08  | 48.1 | 5 | TGAGCACTTTCACAGGTCCTCCCTCAGGCTGTGGGGCCAGGATTTGGTAGCT<br>GGTGCTGA  |
| co3_94<br>40298_<br>x5 | ENST00<br>0003841<br>22.1 | 29 | 1E-06  | 42.1 | 5 | GTTGAGGTCTATCCCGATAGGTCTTTTCCTGTAGCCTGCACGTTGTTGGAAAT<br>GCCTCAT  |
| co3_94<br>43112_<br>x4 | ENST00<br>0003841<br>51.1 | 28 | 0.001  | 32.2 | 4 | GGCCTTTTGGTGCTTACCACAGACTGTGCTCTTTCACTGACTGAATAGAGAGA<br>GGAGGCA  |
| co3_94<br>45496_<br>x4 | ENST00<br>0003839<br>06.1 | 22 | #####  | 44.1 | 4 | GCATGGGTTTGGATTTATGACAGGCCCGTCACCCTGGGCCTGTCATAGTACC<br>CCATGCCA  |
| co3_94<br>46848_<br>x4 | ENST00<br>0003653<br>21.1 | 15 | 0.003  | 30.2 | 4 | GTGAGTGATGAATAGTTCTGTGGCATATGAATCATTAAATTTGATTAAACCCTA<br>AACTCT  |
| co3_94<br>48728_<br>x4 | ENST00<br>0004588<br>62.1 | 26 | 9E-10  | 52   | 4 | TGGAGGACTGAGAAGGTGAGGCAGTTTTGCCCGTGCTGCCTTCCACCGGTT<br>AAGACCTC   |
| co3_94<br>48940_<br>x4 | ENST00<br>0003629<br>15.1 | 25 | 3E-09  | 50.1 | 4 | TGGTCCATCCTAATCCCTGCCGGTCCATCTGTGGCCTGCCAGGTTTTCGCTTG<br>TGGACCAG |

|                        |                           |    |       |      |   |                                                                                                                                                                                                                                                                                                      |
|------------------------|---------------------------|----|-------|------|---|------------------------------------------------------------------------------------------------------------------------------------------------------------------------------------------------------------------------------------------------------------------------------------------------------|
| co3_94<br>49240_<br>x4 | ENST00<br>0004595<br>79.1 | 33 | 8E-14 | 65.9 | 4 | GCTCTGTGATGGAGCCCATGCGTGTGTCATCTGAGCCTCTGGCTTCCCTGCCAG<br>TGCAGCCC                                                                                                                                                                                                                                   |
| co3_94<br>52388_<br>x4 | AY07773<br>7.1/2-276      | 24 | 1E-08 | 48.1 | 4 | GGUCGUGAUGAUUGGUAAAAGGUCUGAUUGCACUGAAUGUCACAGUCCCU<br>UUGUUGCCCUCAACUCCAGCAGCCAUUUUUUCCCUCCCGUCACAUUUAA<br>GUCAUGUGUAUGGGAUCAUGGAGCAGCUGAUAAUUUGGGAUUCUGUCAGU<br>GUGUGUUUCUGAGAGUGAUCGACUCACAGCUGACGAGUAUCCAACAAAACC<br>AGUUACACAGGAGACUGACGAGUGGCAGUCAUGGGUGUGAUGGUGCAUGA<br>UCUCAAGUUUCAAUCUGAGACC |
| co3_94<br>55664_<br>x4 | ENST00<br>0006367<br>29.1 | 22 | 4E-05 | 36.2 | 4 | ATCATTATTGTTATTATTATATTTTTGAGAAGGAATCTCACTCTGTCGCCCAGG<br>CTGGAG                                                                                                                                                                                                                                     |
| co3_94<br>55856_<br>x4 | AJ60945<br>3.1/1-134      | 20 | ##### | 40.1 | 4 | UGCAGCCGUGUCAAAUUCAGUACCUGUCCUAUGCAUGGUAGGCACUGGCC<br>CAGAAGGCUGCCACAGAAACACUGUGACUCAUGGGCCCUGUUCCUGUGUC<br>CCAGGCUCAGGGAUAAAUUUGGUUACAGACAUCA                                                                                                                                                       |
| co3_94<br>55892_<br>x4 | ENST00<br>0003646<br>99.1 | 24 | 1E-08 | 48.1 | 4 | TGGACCAATGATGACAAATGGTGGCATTGGAGTTATGGACGATGAATGATAT<br>GTGTCTGA                                                                                                                                                                                                                                     |

|                        |                                              |    |       |      |   |                                                                                                                                                   |
|------------------------|----------------------------------------------|----|-------|------|---|---------------------------------------------------------------------------------------------------------------------------------------------------|
| co3_94<br>56344_<br>x4 | CM0006<br>79.2/280<br>18770-<br>2801890<br>7 | 16 | 0.001 | 32.2 | 4 | TGTCTCATTTTTGTAGATCAGGACACTGGGAGGCTCCCTTTTCTCCTTAGCCA<br>TGGCTGGAGGCCAAGTCCAGCCCTCAAGGATCATTGTCAGGACCAACACAAG<br>CTGGACAGCCTTGTTTTCTACCTCAGATGGGA |
| co3_94<br>57056_<br>x4 | AL13270<br>9.5/1585<br>45-<br>158469         | 15 | 0.006 | 30.2 | 4 | UGAACUAGUGGUGAUGGCUUGUGGCAUUAUUUAGUCACAGAUGAUGAAUAA<br>AUACAUGCCUGAGACUCUGAGGUUAGU                                                                |
| co3_94<br>57820_<br>x4 | ENST00<br>0003649<br>57.1                    | 23 | 0.002 | 30.2 | 4 | ACTCCAGCCTGGCTGACAGAGTGGGACCCCATCTCAAAAAAAAAAAAAAAAAAATT<br>AAGCTGG                                                                               |
| co3_94<br>63472_<br>x4 | ENST00<br>0003847<br>06.1                    | 19 | 2E-05 | 38.2 | 4 | GTCAGATGATTTGAATTGATAAGCTGATGTTCTGTGAGGTACAAAAGTTAATA<br>GCATGTT                                                                                  |
| co3_94<br>64316_<br>x4 | ENST00<br>0003638<br>83.1                    | 25 | 2E-06 | 42.1 | 4 | CTACAAAGATAGCAACACTTTTCATCAACAGCAGTTCACCTAGAGAGAGTCGA<br>CACTTTT                                                                                  |
| co3_94<br>64956_<br>x4 | ENST00<br>0006304<br>29.1                    | 23 | 4E-08 | 46.1 | 4 | ACTGCCCTAGAGGCGTTGCAGCTGTGGCTGCCGTGTCACATCTGTGTCATT<br>AGGTGGCA                                                                                   |
| co3_94<br>70200_<br>x4 | ENST00<br>0003844<br>36.1                    | 26 | 9E-10 | 52   | 4 | CCGCAGCCAATTAAGCCGACTGAGTTCCTTTCTCATGGGGACCCAGTGTGC<br>GATGGCTG                                                                                   |

|                        |                                                |    |        |      |   |                                                                                                                                                                                  |
|------------------------|------------------------------------------------|----|--------|------|---|----------------------------------------------------------------------------------------------------------------------------------------------------------------------------------|
| co3_94<br>73196_<br>x4 | AJ60948<br>4.1/1-166                           | 22 | 1E-07  | 44.1 | 4 | CAGCACUUGAUACUAACCGAGCUGUCUAUAUCCUAGCCUUGUGUCAAGGC<br>UUGUGAUGUGUUGUGAUAGCUGGGUUUAAGAAGUGCAAUAUJAAAACAAAA<br>GCCAUGAGUCUUUUAAGCCCAGUGUGUAAAGAUACACUCUGAGUUUAACU<br>CAGAGGCACAACU |
| co3_94<br>73780_<br>x4 | ENST00<br>0006312<br>70.1                      | 15 | 0.004  | 30.2 | 4 | GCTGTCCTGGACCTGCCAGCTGCACAGATGCAGATGCTCTGCTATGCCTGTA<br>ACATCGGG                                                                                                                 |
| co3_94<br>75580_<br>x4 | ENST00<br>0003845<br>49.1                      | 22 | 1E-07  | 44.1 | 4 | GGATCGATGATGACTTTTTATACATGCATTCCTTGAAAGCTGAACAAAATGAG<br>TGAAAAC                                                                                                                 |
| co3_94<br>76496_<br>x4 | ENST00<br>0005164<br>19.1                      | 21 | 0.0001 | 34.2 | 4 | TACTCCAGCCTGGATGACAGAGCCAGACTCTGTCTCGAAAAAAAAAAAAAAAAA<br>AAGCTTA                                                                                                                |
| co3_94<br>77336_<br>x4 | ENST00<br>0003652<br>72.1                      | 26 | 9E-05  | 36.2 | 4 | TAGATCAGTGATGACTACTGTTGGTGTATGAGTCATATACGATGAATACATGT<br>CTGAAAT                                                                                                                 |
| co3_94<br>84496_<br>x4 | CM0006<br>85.2/124<br>197743-<br>1241978<br>49 | 22 | 1E-07  | 44.1 | 4 | TGTAAC TTGTGGACAAGGCTTATTGACAGGTGCAAAAAATAAATAATCTTTTGC<br>CACTCAGAACTCATTGTTTCAGTATGAGTTTTGATACACATAAGAAGGAATATT                                                                |
| co3_94<br>89036_<br>x4 | ENST00<br>0004594<br>73.1                      | 20 | 2E-06  | 40.1 | 4 | GGTGAAAATGATGAATTCTGGGGCGCTGATTCATGTGACTTGAAAATGCCAT<br>CCATTTT                                                                                                                  |
| co3_94<br>94680_<br>x4 | ENST00<br>0005842<br>75.1                      | 22 | 3E-07  | 44.1 | 4 | GCCATATGATGTTTTCTTTTCGAAAGGTGAGCGCTTTGCGCAGTGATGACCCT<br>CATCTAT                                                                                                                 |

|                        |                                              |    |       |      |   |                                                                                                                                                                                       |
|------------------------|----------------------------------------------|----|-------|------|---|---------------------------------------------------------------------------------------------------------------------------------------------------------------------------------------|
| co3_94<br>95112_<br>x4 | ENST00<br>0003653<br>46.2                    | 22 | ##### | 36.2 | 4 | CTTGCCAGCCCCATAGACACAGTTGCTGTGCTGTGCCTGTACTATTGGAGCA<br>AAGAAAAA                                                                                                                      |
| co3_94<br>95332_<br>x4 | ENST00<br>0003645<br>87.1                    | 22 | ##### | 44.1 | 4 | GCACCTGAATCTTTCCCATTCCTTGCTGCCTCGTGCCGGTGTGGGGACAGAT<br>GGTGCTAC                                                                                                                      |
| co3_94<br>95628_<br>x4 | AB00714<br>7.1/104-<br>236                   | 38 | 1E-16 | 75.8 | 4 | GGUCUCUCAGCUCCGCUUAACCACACGGGUCCAGUGUGUGCUUGGCGUGU<br>UUUCAGGGAGGCAGAGAAAGGCUCUCCUAAUGNACGACAGACCCGCCAG<br>AAUGGCCUCUCUGUCCUAGGAGUGCGACAAU                                            |
| co3_94<br>98548_<br>x4 | AC01372<br>2.8/1840<br>33-<br>183920         | 28 | ##### | 56   | 4 | ACUGAGGAAUGAUGACAAGAAAAGGCCGAAUUGCAGUGUCUCCAUCAGCAG<br>UUUGCUCUCCAUGGGCACACGAUGACAAAAUAUCCUGAAGCGAACCACUAG<br>UCUGACCUCAGU                                                            |
| co3_94<br>99568_<br>x4 | CM0006<br>76.2/963<br>23787-<br>9632369<br>1 | 19 | 8E-06 | 38.2 | 4 | ATTCTTTTGTGGTTCATAAGCGTGATGATTGGGTGTTACATGAATGTGTGAG<br>ATGTGTCACCCTCAAACCTTGTGTGCTATTTTTCTGCCTGCCT                                                                                   |
| co3_95<br>00392_<br>x4 | CM0006<br>73.2/129<br>04988-<br>1290481<br>7 | 23 | 1E-05 | 38.2 | 4 | TTGATCACAGGACCCCTTTACACTCGTAAATAAATTATTGATGTACCAGACAG<br>CCTGACCCTGACCTCAAGTAAATTCAGGAGACGCCTTTCTGGGTTTTGAA<br>TTTGCCGTAACAGGTGTGAGCATTCTAGCAGCAGTTTGGTGATCATGTACGAT<br>ACTGCAAACAGGA |

|                        |                                                |    |        |      |   |                                                                                                                                             |
|------------------------|------------------------------------------------|----|--------|------|---|---------------------------------------------------------------------------------------------------------------------------------------------|
| co3_95<br>10120_<br>x4 | AJ60943<br>5.1/1-128                           | 22 | 1E-07  | 44.1 | 4 | GUGCACAUUUCAUUGACCUGCUUUCUUUUAUGUGAGUAGUGUUUUUUUU<br>AUGUGCUAUACAAAUAUUUGAAGGCUAAUUAGCAGUAUAACUAUAAAUAGU<br>AAUGCUGCCAGUCUCCUUCAGACAAAA     |
| co3_95<br>18652_<br>x4 | ENST00<br>0003656<br>09.1                      | 14 | #####  | 28.2 | 4 | TCACTGTGATGATGGTTTTTCAACGTTACAGTTTCCACCAGAAAGATTTTCCT<br>TAGTGT                                                                             |
| co3_95<br>20680_<br>x4 | ENST00<br>0003846<br>75.1                      | 23 | 4E-08  | 46.1 | 4 | TTCCACAGCTACTGGTCTGCAGCTGTTCTTATGGTAGCAGTTGTGGCATTCT<br>CTGTGGG                                                                             |
| co3_95<br>24041_<br>x3 | CM0006<br>69.2/102<br>194205-<br>1021940<br>76 | 26 | #####  | 52   | 3 | TGCCTCTTTTTGTTAAAGATAATTTGCTTTTTGGTAGTGCCCATCTCCTATCAG<br>TCAGGGATGAAGCAATCCCTTGTTTCATCCCCAGCTTGGCTTTTGATCTATGCC<br>TGGTTCATGCCTTGGACACATGG |
| co3_95<br>24647_<br>x3 | CM0006<br>68.2/134<br>206514-<br>1342064<br>11 | 15 | 0.003  | 30.2 | 3 | ATCCCTTTGTCGTTTATAAGTGTGATGATTGGGTTTTTCATGTTCCCTGTGTGAGA<br>TATGCCTCCTTCAAGCCTTGTTATGATGTCTGCACATTACCTGCCTGTCA                              |
| co3_95<br>27341_<br>x3 | ENST00<br>0003913<br>22.1                      | 17 | 0.0002 | 34.2 | 3 | GTGCCCTTTTAAGGTTGACGCAGTGCTTTAAGGGGCTAACACAGAAGGGTAA<br>AGGAAGTC                                                                            |
| co3_95<br>28949_<br>x3 | ENST00<br>0003841<br>58.1                      | 29 | 2E-11  | 58   | 3 | GTCTTCTCATTGAGCTCCTTTCTGTCTATCAGTGGCAGTTTATGGATTTCGCAC<br>GAGAAGA                                                                           |
| co3_95<br>31985_<br>x3 | ENST00<br>0003912<br>15.1                      | 28 | 3E-08  | 48.1 | 3 | GTTCCCTTTTAAGGCTGACCCAGTGCTTTAAGAGGCTGATACAGAAGGGTAAA<br>GTTAAGT                                                                            |

|                        |                                 |    |        |      |   |                                                                                                                                                     |
|------------------------|---------------------------------|----|--------|------|---|-----------------------------------------------------------------------------------------------------------------------------------------------------|
| co3_95<br>32051_<br>x3 | AJ60947<br>0.1/1-125            | 15 | 0.005  | 30.2 | 3 | GCGCUCACUAAGGCUCGGUCCUCUCCACGUGGUCCUGACCUGUCCUCUGU<br>GAGCAAGAGAAAACAGGACUGGUUUUGGGGGUGUCCUGUCUCAGUGGACACA<br>GGACACCACGGUUUUCAGUACAACA             |
| co3_95<br>32486_<br>x3 | ENST00<br>0003847<br>44.1       | 29 | 2E-11  | 58   | 3 | GCATGGTAATGGATTTATGGTGGGTCCTTCTCTGTGGGCCTCTCATAGTGTAC<br>CCATGCC                                                                                    |
| co3_95<br>32561_<br>x3 | ENST00<br>0005165<br>17.1       | 42 | 5E-19  | 83.8 | 3 | GGATCGATGATGACTTTAAAATGGATCTCATCGGAATCTGAACAAAATGAGTG<br>ACCAAAT                                                                                    |
| co3_95<br>35420_<br>x3 | AC09052<br>7.3/1717<br>4-17301  | 14 | 0.008  | 28.2 | 3 | UCCACCACUAUUGGUCUGCAGCUCUUCUUAUGGUAGCAGUUGUUGCAUU<br>UCUCUGUGGGAAAGAAAAGAGGAUUAACACCUCUUUCUAGCAAAACAGA<br>GAGUAGGCAUAUGUGUGACAGACACAA               |
| co3_95<br>35492_<br>x3 | AC10458<br>1.22/693<br>59-69497 | 21 | 6E-07  | 42.1 | 3 | UGGCUCGAUUUCCUGGGGGGUGGUCUCAGCCCACUCCACCUCCCCUCAGC<br>CGAGCCUAGAGUAGAGGGGCCAGGCAUCCUCCCCAGGGGAGGGGCGUUG<br>AAGCAAGGAGCCUCUCCUGGGCUGUCCUAGCCUCACAUUU |
| co3_95<br>40571_<br>x3 | ENST00<br>0003630<br>24.1       | 16 | 0.0005 | 32.2 | 3 | GATCAAGGATGAAAATACCCAAATTTGAGTATCAGAAGACCTTCCAGTCTACT<br>TGATGCA                                                                                    |
| co3_95<br>41066_<br>x3 | ENST00<br>0003841<br>11.1       | 28 | 6E-11  | 56   | 3 | TGCAGCCGTGTCAAATTCAGTACCTGTCCTATGCATGGTAGGCACTGGCCCA<br>GAAGGCTG                                                                                    |

|                        |                                              |    |        |      |   |                                                                                                                                            |
|------------------------|----------------------------------------------|----|--------|------|---|--------------------------------------------------------------------------------------------------------------------------------------------|
| co3_95<br>43628_<br>x3 | ENST00<br>0006075<br>95.1                    | 19 | 0.005  | 30.2 | 3 | TCCAGCAGTCGTTAGCTCTCCTGGCTAGTGTGATGCCTGTGATGGTGTTCAC<br>TGTTGGA                                                                            |
| co3_95<br>51137_<br>x3 | CM0006<br>77.2/751<br>21666-<br>7512153<br>6 | 16 | 0.001  | 32.2 | 3 | AACCAATTGTGCCAGTGGGGCTATGGGTGGCCCCTTTTCTCCTCAGTCAGGG<br>CTGGAGGCCAAGATCAGCCTTTGAGGATTATCAGGGCTGCCACAAGCTGGG<br>CAGCCTTGTTTTCTACCTCAGACATTT |
| co3_95<br>52556_<br>x3 | ENST00<br>0003631<br>56.1                    | 20 | 2E-06  | 40.1 | 3 | TCGATGGGTGGGATAATCCTTACCTGTTCCCTCGTTTTGGAGGGCAGATAGAA<br>CATGATGA                                                                          |
| co3_95<br>54266_<br>x3 | ENST00<br>0005166<br>16.1                    | 26 | 0.0001 | 36.2 | 3 | TTAAATGTCCATCACAGGAAACACCTTTAGAGTAACTCTGTGGTTTTGCTTTAT<br>TCACAG                                                                           |
| co3_95<br>56936_<br>x3 | ENST00<br>0003841<br>42.1                    | 25 | 0.0002 | 34.2 | 3 | CTGCAGTCAATTAAGTGTACTGAGTTCCTTTCTTATGGGGGCCAGTGTGCA<br>ATGGCTG                                                                             |
| co3_95<br>57341_<br>x3 | ENST00<br>0003839<br>66.1                    | 32 | 3E-13  | 63.9 | 3 | CGGCAGACAGTTATCCCTTTCTAGTCTGGCTCGTGGACTCTAGAGGGAGTC<br>AGTCTGCA                                                                            |
| co3_95<br>59702_<br>x3 | ENST00<br>0003912<br>87.1                    | 29 | 0.0002 | 34.2 | 3 | ACTGCCCTGGAGGCATTGCAGATGTGGCTGCTGTGTCACATTTGTGTCATTA<br>GGTAGCA                                                                            |
| co3_95<br>60770_<br>x3 | ENST00<br>0003912<br>92.1                    | 15 | 0.002  | 30.2 | 3 | TCATCAGATGGGATAACTTTTACCTGTTCCCTTTTGGAGGTTAGATTCTAAT<br>ACGATG                                                                             |
| co3_95<br>62390_<br>x3 | ENST00<br>0003843<br>00.1                    | 54 | #####  | 54   | 3 | ATCCAAGGGGATTCCCTCTCCAAGGGAACATGCAGTGCCCCTCTCAGGAAAG<br>TAACAACC                                                                           |

|                        |                                              |    |        |      |   |                                                                                                   |
|------------------------|----------------------------------------------|----|--------|------|---|---------------------------------------------------------------------------------------------------|
| co3_95<br>65915_<br>x3 | CM0006<br>63.2/260<br>06216-<br>2600629<br>9 | 21 | 0.0004 | 34.2 | 3 | TGGCCAGTGATGAAGTCACCATTAGTGCAGTCTGAGTTCTGGGAACCAGGTG<br>ATGGAGTGTGTTCCAAGAATGGACTGAGGGCC          |
| co3_95<br>67508_<br>x3 | ENST00<br>0003909<br>30.1                    | 28 | 6E-11  | 56   | 3 | GTGAAATGATGATTCAGTTTATCCATTCGCTGAGTGCGCTGCACTGACCTTCT<br>TCCAAGC                                  |
| co3_95<br>70835_<br>x3 | AL35507<br>5.6/1934<br>39-<br>193515         | 21 | 5E-07  | 42.1 | 3 | AGUUUGCCAUGAUGAAAUGCAUGUUAAGUCCGUGUUUCAGCUGAUCAGCC<br>UGAUUAAACACAUGCUCUGAGCAGACU                 |
| co3_95<br>71657_<br>x3 | ENST00<br>0003840<br>28.1                    | 41 | 7E-09  | 50.1 | 3 | CTGGCACTTTCACAGTTCCTTCCCCAGGCAGTGGGGCCAGGATTTGGTAGCT<br>GGTGCTGA                                  |
| co3_95<br>75071_<br>x3 | CM0006<br>70.2/277<br>55122-<br>2775503<br>2 | 16 | 0.0008 | 32.2 | 3 | ATCCTTCTGTAGTTTATGAGTGTGATGATTGGCTGTTTCATGTGCATGTATGAG<br>ATGTGCCACCCTTGAACCTTGTGCATGTCTGATGTGAAA |
| co3_95<br>76118_<br>x3 | ENST00<br>0006084<br>59.2                    | 22 | 3E-07  | 44.1 | 3 | TTAGAGGTATTTTCAGTACTCTGGCTTAAGAGCCAATGATGTTTTTATTCAAAA<br>TGTCTG                                  |
| co3_95<br>78092_<br>x3 | CM0006<br>79.2/196<br>62000-<br>1966209<br>0 | 33 | 2E-11  | 58   | 3 | CTGATTCTTTGTACTIONAGGATGCAAAGAAAACAATCCTTGTGCCTTCTATCTCT<br>CTTGGTGGCAGCCCAGATTGAATTGGGAATACATCT  |
| co3_95<br>80648_<br>x3 | ENST00<br>0005168<br>84.1                    | 14 | 0.008  | 28.2 | 3 | TGTAACCTTGTGGACAAGGCTTATTGACAGGTGCAAAAAATAAATAATCTTTTGC<br>CACTCA                                 |

|                        |                                              |    |        |      |   |                                                                                                                                               |
|------------------------|----------------------------------------------|----|--------|------|---|-----------------------------------------------------------------------------------------------------------------------------------------------|
| co3_95<br>85970_<br>x3 | BK00556<br>7.1/284-<br>353                   | 32 | 3E-13  | 63.9 | 3 | GGCAAUGAUGAAAAGGUUUUACUACUGAUCUUUGUAACUAUGAUGGUUU<br>CUACACUUGACCUGAGCUCA                                                                     |
| co3_95<br>86507_<br>x3 | CM0006<br>77.2/220<br>60827-<br>2206072<br>7 | 18 | 0.008  | 28.2 | 3 | ATCCCTTCGTAGTTCATAAGCGTGATGACTGAGTTTTTGCCTCCTGTGTGAA<br>ATGTACCTCCCTCAAACCTTATGACATATATACATTACCTGACTCACA                                      |
| co3_95<br>87260_<br>x3 | ENST00<br>0003641<br>39.1                    | 35 | 0.007  | 30.2 | 3 | TGCTGGAGTGATGAAAAAGTATCTTCAGGTGTGGCTGTGGCCACCTTGGCCA<br>CCTGTGTG                                                                              |
| co3_95<br>89828_<br>x3 | ENST00<br>0003908<br>43.2                    | 24 | 0.0008 | 32.2 | 3 | TAGTCAGGCAGGATAATCCCTATCTGTTCCTCCTTTTGGAGGGCAGTAGAATG<br>TGGTAAT                                                                              |
| co3_95<br>89891_<br>x3 | AC02091<br>8.6/1655<br>18-<br>165651         | 30 | 8E-05  | 36.2 | 3 | GGCCUCCUGGUGCUUACAAGCAGCUGUGCUUGCAUUGACUGUACAGAA<br>AAAAAGAGAUAGAGUAAACACACCCCGUAUACAACUCAGCCCAGGUCCUGU<br>GCCUUGUCUAUUAUUGUGAAUAGGGGGGACAUAG |
| co3_95<br>97850_<br>x3 | ENST00<br>0003847<br>85.1                    | 30 | #####  | 52   | 3 | TTCCACCACTATTGGTCTGCAGCTCTTCTTATGGTAGCAGTTGTTGCATTTCTC<br>TGTGGG                                                                              |
| co3_96<br>01135_<br>x3 | ENST00<br>0003630<br>90.1                    | 14 | 0.008  | 28.2 | 3 | GGGTCGATGATGAGAACTTATATTGTCTGAAGAGAGGTGATGACTTAAAAAT<br>CATGCTC                                                                               |
| co3_96<br>01837_<br>x3 | ENST00<br>0003840<br>84.1                    | 23 | 9E-08  | 46.1 | 3 | GGTCTCTCAGCTCCGCTTAACCACACGGGTCCAGTGTGTGCTTGGCGTGTTT<br>TCAGGGAG                                                                              |

|                        |                                              |    |        |      |   |                                                                                                                                                                                                                                                                                          |
|------------------------|----------------------------------------------|----|--------|------|---|------------------------------------------------------------------------------------------------------------------------------------------------------------------------------------------------------------------------------------------------------------------------------------------|
| co3_96<br>04834_<br>x3 | AY07773<br>8.1/1-265                         | 24 | 1E-08  | 48.1 | 3 | GGUCAUGAUGAAUGGUAAGGUCUGAGUCCUCAGAUCUCCUCCCGGCA<br>UCCAGUUAUCCCGAGCUGCCUCUCCUCAUCGCACUUCAGAAGUGCUGC<br>GAUGGGCAGAAGGGCAGCUGACACUCCGUGAUGUCCCUCAUUCUGUGUUC<br>CUCCGUGAGCUCAGGGAAGACACUGGUUGGCAUCCAACAGCUUAGUCACA<br>AAGGGAUUUGAUUGUUGGGAGUGCUGGUAUCUGUGGCUAUGAUCUGCCUU<br>GUUCAAGCUGAGACC |
| co3_96<br>05323_<br>x3 | CM0006<br>78.2/279<br>6532-<br>2796408       | 24 | 2E-08  | 48.1 | 3 | GCCGAGACTAAGTCGCATGCTGACACAGCTCTTGGTGTGCTACGGTACTTGG<br>AGAGAATCTACTGGTCTTGATTCACTGGTGGGGGCAGTTGTTGCTTCCTTTAG<br>TGCCAGATCAGAAACATAC                                                                                                                                                     |
| co3_96<br>06556_<br>x3 | ENST00<br>0004588<br>38.1                    | 16 | 0.0009 | 32.2 | 3 | CTGGAAAAGACAATGATGTTTTATTTCCAAGCACATATCTGAGTTGTATGTGTG<br>GACAGC                                                                                                                                                                                                                         |
| co3_96<br>08623_<br>x3 | CM0006<br>75.2/228<br>03145-<br>2280322<br>4 | 21 | #####  | 42.1 | 3 | TTCCTAAAGATTCACAATGAACATTATTATTTAAGAGCTTTTTGAAGTGCAAAT<br>CCATGAGCTTTTTAACCCTGAGCAAT                                                                                                                                                                                                     |
| co3_96<br>08851_<br>x3 | ENST00<br>0004591<br>28.1                    | 14 | 0.009  | 28.2 | 3 | GGATCGATGATGAGAATAATTGTCTGAGGATGCTGAGGGACTCATTCCAGAT<br>GTCAATCT                                                                                                                                                                                                                         |
| co3_96<br>18832_<br>x3 | ENST00<br>0003847<br>37.1                    | 26 | 8E-10  | 52   | 3 | GTGCACATTTATTGACCTGCTTTCTTTTATGTGAGTAGTGTTATTTCTTATGT<br>GCTATA                                                                                                                                                                                                                          |

|                        |                                              |    |        |      |   |                                                                                                                                            |
|------------------------|----------------------------------------------|----|--------|------|---|--------------------------------------------------------------------------------------------------------------------------------------------|
| co3_96<br>19288_<br>x3 | CM0006<br>75.2/411<br>80087-<br>4117998<br>1 | 22 | 0.009  | 28.2 | 3 | ATCCTTTTGTAGTTTATAAGCGTGATGACTGGGGTTTCACGTGCATGTGTGAA<br>ATGTGCCTTCCCCAAGCCTTGTTATGACCTCATTGGAACATTACCCCTTTGAC<br>A                        |
| co3_96<br>23452_<br>x3 | ENST00<br>0003627<br>01.1                    | 14 | 0.009  | 28.2 | 3 | TTGGGCAGTGAACACCCAAGTGTGCTTTATAGTTCCTTTGGCTTTGACTTTGT<br>GCTAGAG                                                                           |
| co3_96<br>26239_<br>x3 | ENST00<br>0003635<br>48.1                    | 25 | 3E-09  | 50.1 | 3 | ATGCAGGTACTGTTACAATACTGATGTGTTTTGTTGTCGTTCCCCCTGCTT<br>AAAGCA                                                                              |
| co3_96<br>28090_<br>x3 | AJ60948<br>2.1/1-130                         | 24 | 1E-08  | 48.1 | 3 | UGGACAUUUUUUUUUUUUUCAGUUUCUUCUCAAGGUGAAGAUAACUCUUUGU<br>AAAUGUCCUACAGAAUUAUAGUAGCUUUCUGUUCUUCUUUGCAAGUAAAA<br>AGGGUGGGUCGUUCCACUACUGACAUUU |
| co3_96<br>29443_<br>x3 | AL13270<br>9.5/1804<br>73-<br>180397         | 18 | #####  | 28.2 | 3 | UGGAUCAAUGAUGAGUAUGCGUGGGGCAUCUGAAUCAAAUUAUUCUGAUUA<br>UACCCUGUCUGUAUCUCUGAGGUCCA                                                          |
| co3_96<br>36247_<br>x3 | ENST00<br>0003648<br>02.1                    | 28 | 5E-06  | 40.1 | 3 | TGGACCAATGATGAGTACCATGGGGTATCTGAAACAGGATTTTTGATTAAACC<br>CATATGC                                                                           |
| co3_96<br>37981_<br>x3 | ENST00<br>0004594<br>75.1                    | 16 | 0.0008 | 32.2 | 3 | AGTTTGCCATGATGAAATGCATGTAAAGTCCGTGTTTCAGCTGATCAGCCTGA<br>TTAAACA                                                                           |

|                        |                                              |    |        |      |   |                                                                                                                                                                                                                                    |
|------------------------|----------------------------------------------|----|--------|------|---|------------------------------------------------------------------------------------------------------------------------------------------------------------------------------------------------------------------------------------|
| co3_96<br>42187_<br>x3 | CM0006<br>72.2/231<br>66985-<br>2316710<br>1 | 22 | 0.0001 | 36.2 | 3 | AGCATTAAATCTACTGAAGATATCCACATCCTTAGACAGACGCAAAAAATAAAT<br>TCTCTTTTGCAACTCAGAGCTCATTGTGCGGTATGAGCTTTGATACATATAAG<br>AAGGAATATT                                                                                                      |
| co3_96<br>45772_<br>x3 | ENST00<br>0004592<br>01.1                    | 22 | 0.009  | 28.2 | 3 | ATCATTTTGTAGTTCATAAGCATGATGATTGGGCATTCACATGGATGTGTGAA<br>ATGTGCC                                                                                                                                                                   |
| co3_96<br>46633_<br>x3 | CM0006<br>63.2/512<br>31356-<br>5123125<br>3 | 45 | 8E-09  | 50.1 | 3 | ATTCTTTTGTAAATTCATAAGCATGATGACTCGGTATTCACGTGCATGTGTGAGA<br>TGTGCCACCCTGGAACCTTGTTGCAACGTCAGCACATTATGGGTCTGACA                                                                                                                      |
| co3_96<br>47374_<br>x3 | ENST00<br>0003844<br>52.1                    | 40 | 7E-18  | 79.8 | 3 | CTGCATTCTTAAACCCTCTTGGTAGCTTCGTTCTAAGTGCTTCCAAGATATGA<br>GTGAATG                                                                                                                                                                   |
| co3_96<br>52192_<br>x3 | CM0006<br>68.2/927<br>90453-<br>9279066<br>5 | 31 | #####  | 30.2 | 3 | AAGACTCCTTTCAGGAATCATTCTTTAGTTCCTACTAGAGAGGCTTCTCTTAA<br>CATGTGGAGCGCTGGAACCACAAAGAGGAGGTGCAGCATTCAAGTCTAAGT<br>GTGAAGTGGATTCTTGGTGTGCTGTGCTGCAACTGCCATTTGCTAATGATGA<br>CCTTGCTTTTCTTACTTAGAGTAAGACAGAGAGACAGCAGTCAGCCTAAGCG<br>GT |
| co3_96<br>54991_<br>x2 | ENST00<br>0003841<br>07.1                    | 15 | 0.004  | 30.2 | 2 | TGCCTCATTCTAGAGAATGGGCACTGTTGATCATGGTGTCCAAAAATAGTTAA<br>TGTGGCT                                                                                                                                                                   |
| co3_96<br>55031_<br>x2 | ENST00<br>0005164<br>82.1                    | 19 | #####  | 30.2 | 2 | ATGCACATCTGCTGCTATGGTTTCCACTACAGATGCAAGGAAAAAGTGTCTC<br>GTCCTTT                                                                                                                                                                    |

|                        |                                              |    |       |      |   |                                                                                                               |
|------------------------|----------------------------------------------|----|-------|------|---|---------------------------------------------------------------------------------------------------------------|
| co3_96<br>56437_<br>x2 | ENST00<br>0005172<br>33.1                    | 15 | 0.003 | 30.2 | 2 | CTGCATTTTACCCTCCCTGATGGGGCTCAGTGTGCAGCAGCTGGAAAAAGTA<br>GATGCCCT                                              |
| co3_96<br>57267_<br>x2 | ENST00<br>0003645<br>06.1                    | 15 | 0.007 | 30.2 | 2 | CTGCAGCTAGTTAACCTGACTTGTCCACCTCCCTGCTGGGGGCTCAGTGTGC<br>AATGGTTG                                              |
| co3_96<br>57311_<br>x2 | ENST00<br>0003625<br>35.1                    | 20 | 5E-06 | 40.1 | 2 | AGCCTCATGCTAGATGAGAATGGGCACTGTTGATCAAGGTGTCCAAAAATAGT<br>TAATGTG                                              |
| co3_96<br>63145_<br>x2 | ENST00<br>0003910<br>00.1                    | 26 | 2E-07 | 44.1 | 2 | AGGGAAGTGATGACAACTGTGACTGTTGTGTGACACTGATTTCTCTCATATTT<br>GTACTGG                                              |
| co3_96<br>64297_<br>x2 | CM0006<br>64.2/699<br>12695-<br>6991279<br>9 | 15 | 0.004 | 30.2 | 2 | ATCCTTTTATAGTTCATAAACATAGTAATTAGGTGTTCCCATTGCATGTATGAG<br>ATGTGCCTCCCAAAGAGCTTGTTACAGCGTTAGTACATTACCTGTCTGATA |
| co3_96<br>64691_<br>x2 | ENST00<br>0003640<br>09.1                    | 20 | 0.001 | 32.2 | 2 | TCACAATGATGAATGGTCCAAAACATTCGCGGTTTCCACCAGAATTCAAGGTG<br>TTGGCAA                                              |
| co3_96<br>67629_<br>x2 | CM0006<br>72.2/121<br>45663-<br>1214576<br>6 | 14 | 0.008 | 28.2 | 2 | ATGCTTTCGTAGTCCGTAGATGTGATGATTGGATCTTCACGCTCGTGTGTGAG<br>ATGTGCCTCTCTCCAGCCTTGTTAGGATGTTGGAACATTACCCATCTGACA  |
| co3_96<br>69043_<br>x2 | CM0006<br>78.2/114<br>67641-<br>1146772<br>9 | 14 | 0.008 | 28.2 | 2 | AACCTAAACATGACAACTGGGTTTTTCATGCTATTGCATGATACCTGCCTCCCT<br>CAAACTTGTTACATCATCATATCACTCACCTGATA                 |

|                        |                                                |    |        |      |   |                                                                                                                                                                 |
|------------------------|------------------------------------------------|----|--------|------|---|-----------------------------------------------------------------------------------------------------------------------------------------------------------------|
| co3_96<br>70257_<br>x2 | CM0006<br>75.2/324<br>20516-<br>3242039<br>0   | 34 | 0.0001 | 36.2 | 2 | AATTGGGATCAAAGATGCAGCCGCCTTCCCATTTAAGCAGCACAGACAGCCC<br>AAAGTGACAGTTTTCTGTACAGTTACTCTTCTGTTATCTGTAAGTACTGATCTATG<br>ACATTTTGGGAAAAAACAGCC                       |
| co3_96<br>70475_<br>x2 | CM0006<br>79.2/195<br>57560-<br>1955771<br>1   | 25 | 3E-09  | 50.1 | 2 | GCCCAGGGTATGTTACGGGGCGATGCTGCCCTCCCAGCTGGCCCATGGGT<br>GACCCTGGGAACATTAAGTGCCTCACAACGTTTGTGCCTCAGTTACCCGTAG<br>ATGTAGTGAGGGTAACAATACTTACTCTCGTTGGTGATAAGGAACAGCT |
| co3_96<br>71365_<br>x2 | CM0006<br>65.2/129<br>074095-<br>1290742<br>02 | 14 | 0.009  | 28.2 | 2 | AGCCTTTTGTAGTTTATAAGTGTGATGATTGGCTTTTCTCATTCTTGTGTGAGT<br>GAGAACTTCTTTTCTCAAACCTTGTTATGATGTCAGCACATTACCTACCAGACA                                                |
| co3_96<br>72219_<br>x2 | AC02063<br>4.16/189<br>95-18865                | 16 | 0.0006 | 32.2 | 2 | UGCAGCUGUGUCAAAUUUGGUGCCUGCCCUGCCUGUGUAGGCACUGACCC<br>AGAAGGCUGCCACAGAAACACUGACUCAUGGGCCCUGUUCUGUGUCUCG<br>GGCUCAGGGAUAAAUUUGGUUACAGAUACCA                      |
| co3_96<br>72987_<br>x2 | CM0006<br>84.2/215<br>45125-<br>2154520<br>7   | 24 | 3E-06  | 40.1 | 2 | CAGCCAATGATGACGTGGCCACCGCACAACTGAGTTCTGGGAACCATGTGA<br>TGGAATGTGTTCTGGGAATAGACTGCAGCCA                                                                          |

|                        |                                                |    |       |      |   |                                                                                                                                      |
|------------------------|------------------------------------------------|----|-------|------|---|--------------------------------------------------------------------------------------------------------------------------------------|
| co3_96<br>73379_<br>x2 | CM0006<br>64.2/218<br>185082-<br>2181849<br>79 | 14 | 0.009 | 28.2 | 2 | ATACTTTTGTAGCTCATAAGCATGATGATTCAGTGTCCAAGTGCATGCATGAG<br>ATGTGCCTCCCTCAAACCTTGTCAACATCAGCACGTTGCTCATCTGACA                           |
| co3_96<br>74549_<br>x2 | CM0006<br>63.2/122<br>21271-<br>1222114<br>8   | 22 | 0.009 | 28.2 | 2 | CTAGAAAAATTGAAGATTTGGCCACTCTGGAAACTGCTGAGGGCCCCATGTG<br>TAATGGCTGCAAACAGCTTCCTTTGTTGTGTAGACAGCCTGAGTTTTTCTCTAA<br>GGGACTATGGAGACAGCC |
| co3_96<br>75351_<br>x2 | ENST00<br>0003626<br>96.1                      | 42 | 2E-09 | 52   | 2 | GGCCTCTCAGTGCCGCTTAATCACACAGGTCCAGTGTGTGCTTGGTGTCTTTT<br>CTGGGAG                                                                     |
| co3_96<br>76467_<br>x2 | ENST00<br>0004085<br>28.2                      | 15 | 0.006 | 30.2 | 2 | AAGACTCCTTTCAGGAATCATTCTTTAGTTCCTACTAGAGAGGCTTCTCTTAA<br>CATGTG                                                                      |
| co3_96<br>79169_<br>x2 | ENST00<br>0003909<br>04.1                      | 14 | 0.008 | 28.2 | 2 | AAAGCAAGCTGGAATTACAGTGCTTCATTTTGTGAAATACTAAATACCATCATT<br>ATGCTG                                                                     |
| co3_96<br>79543_<br>x2 | CM0006<br>63.2/491<br>51390-<br>4915150<br>3   | 14 | 0.008 | 28.2 | 2 | ATAGTTTAAAAAATTTGTTAAGCATGATGATTAACTTTTTACAATAATGCAATAA<br>TGTGTGAGCTATGCCTCTCTCAAACCTTATTATGATGTTGGCCATTACCCAT<br>CTGATG            |
| co3_96<br>80181_<br>x2 | ENST00<br>0003909<br>93.1                      | 14 | 0.008 | 28.2 | 2 | TTCAGATGATTTGAATTGATAAGCTGAGGTTCTGTGAGGAATGACAGTTAAGA<br>GCATGTT                                                                     |

|                        |                                                |    |        |      |   |                                                                                                                                         |
|------------------------|------------------------------------------------|----|--------|------|---|-----------------------------------------------------------------------------------------------------------------------------------------|
| co3_96<br>80471_<br>x2 | CM0006<br>69.2/138<br>482583-<br>1384824<br>80 | 17 | 0.0002 | 34.2 | 2 | ATCCTTTTGTGGTTCATAAGCATGATGATCAGGTTTTTCAGGCATATGTGTACG<br>ATGTGCCTCCTTCAAACCTTTGTTAGGATGCTACCACGCTACCCATCTGACT                          |
| co3_96<br>81185_<br>x2 | BA00002<br>5.2/1065<br>47-<br>106465           | 20 | 2E-06  | 40.1 | 2 | UGGGAGUGGUAAUGAUGAUCUGGUUGGACAAGAGUCUCUGAGCUUUUCUC<br>UGAGGAUCUUUGAACCCACCUGAUCCACCUUCA                                                 |
| co3_96<br>81695_<br>x2 | ENST00<br>0005788<br>36.1                      | 18 | 4E-05  | 36.2 | 2 | CTGCAGACAGTTAAGCCAACTGAGTTCCTTTTCCTCAGGGAGGCCCAAGTGTAC<br>AATGGCTG                                                                      |
| co3_96<br>81757_<br>x2 | ENST00<br>0006307<br>37.1                      | 31 | 1E-12  | 61.9 | 2 | GAGCACTGCTTTAGAGCCTCTGCGTGTCTGGCTGTGGCCTCAGGGGTCTAGC<br>AGCAGTGC                                                                        |
| co3_96<br>83337_<br>x2 | CM0006<br>67.2/138<br>559039-<br>1385589<br>70 | 24 | 1E-08  | 48.1 | 2 | GTGCCGTGATGTATTTGTCAACACATCACTCTGAAGAAAAGTATGTGGTGACT<br>TTCTGTGACTGAGCATG                                                              |
| co3_96<br>85657_<br>x2 | CM0006<br>63.2/171<br>768070-<br>1717681<br>75 | 15 | 0.003  | 30.2 | 2 | CACCCCTTTTCTCCTCAGCCAAGGCTAGAGGCCAAGATCAGCCCTCAGGGAT<br>CATCATCAGGACTGCCATGAGCTGAGCTGCCTTGTTTTCTGCCGAAACAT<br>GT                        |
| co3_96<br>86409_<br>x2 | BC02823<br>2.1/151-<br>277                     | 26 | 8E-10  | 52   | 2 | GUUGGUUGAAAAUCGCCCCCGGCUUUGGCCGUGGCCGCGGGUGAGAUUC<br>GGCGCCCAGAGCCCCCGGGGGCCUCAGCUCACCGCGCGCUGCCCCAUGU<br>GCGGCGGUGAAACCCAGGCCCCGACAGGC |

|                        |                                              |    |        |      |   |                                                                                                                                                      |
|------------------------|----------------------------------------------|----|--------|------|---|------------------------------------------------------------------------------------------------------------------------------------------------------|
| co3_96<br>91283_<br>x2 | CM0006<br>85.2/881<br>48792-<br>8814891<br>8 | 14 | 0.008  | 28.2 | 2 | GTTGGTTGTGAATAACCCTTGGCTTTGATTGTGGCTGTGGATGAAATTCAGCA<br>CCTACAGCCACCAGTAGCCTTAGCTCACCACCCACTGTCTCAATATCATGGGT<br>AAAACCCAGGCTCTGACAGGC              |
| co3_96<br>92659_<br>x2 | ENST00<br>0003844<br>92.1                    | 15 | 0.003  | 30.2 | 2 | CTGCAACCAATTAAGCCGACCTAGTTCCTTTCTCTTTGGGGCCTGGTGTTCA<br>ATAGCTG                                                                                      |
| co3_96<br>92801_<br>x2 | ENST00<br>0005160<br>87.1                    | 17 | 0.0002 | 34.2 | 2 | GGATCGATGATGACTTAAAGATTTATCTAATTTAAATCTGAACAAAATGAGTGA<br>CCAAAA                                                                                     |
| co3_96<br>94563_<br>x2 | CM0006<br>78.2/686<br>30968-<br>6863086<br>4 | 27 | 0.006  | 30.2 | 2 | TAGTGTGGAAGTGTCTACTCCTCATTCTGTGGAAGCAGGAATACATTCATAA<br>CATGCTCCATTAATAAAGGAGTTCTAGGCCAGGCAGCGTGCCTCATGCCTGG                                         |
| co3_97<br>01909_<br>x2 | CM0006<br>74.2/645<br>75665-<br>6457574<br>1 | 16 | 0.001  | 32.2 | 2 | GCCAAATGATGCTTATTTGACTCTGGTGCACTTCAGTGTAAGGATGATTTATA<br>ATCTGTCACTCATGATTGAAGGCC                                                                    |
| co3_97<br>03327_<br>x2 | CM0006<br>72.2/601<br>7194-<br>6017054       | 15 | 0.007  | 30.2 | 2 | ATGCATCTTAGAACATCCAGGAGACAGTCTTCTAAAATACCAGTGAGTGGCAA<br>GATATGAGTAAATTCACAGGAAAAGGAAGGCAGTCCAAAGGGCTGTGCTTC<br>TCCTGTGGCTCAGTGTTATTCATAGCTGTGACATCT |
| co3_97<br>03849_<br>x2 | ENST00<br>0005843<br>02.1                    | 26 | 8E-10  | 52   | 2 | CTACCAAAGTTAGCTTTTTGGGGGCAGTTTTTAAGTAACCTTTGCCAACT<br>TGGGCTA                                                                                        |

|                        |                                              |    |        |      |   |                                                                                                                                        |
|------------------------|----------------------------------------------|----|--------|------|---|----------------------------------------------------------------------------------------------------------------------------------------|
| co3_97<br>05133_<br>x2 | ENST00<br>0004590<br>83.1                    | 34 | 2E-14  | 67.9 | 2 | GGTGCAAATGATGCATATGTTAGCGACCAAAGCCTGATCTTTGCTGATTAGTC<br>ATAATTA                                                                       |
| co3_97<br>06143_<br>x2 | AK02448<br>6.1/3319-<br>3428                 | 23 | 4E-08  | 46.1 | 2 | UGCCCAGUGAUGACACCAUCCUUGCUCCCCCGUGCCCCCAGGGGCUAUGG<br>GCGACACCAUGGCUGCCCCUGGGCUGGGCCAGUGGGGCCAAUGCCCAGG<br>GGCUGAGGGCA                 |
| co3_97<br>06733_<br>x2 | ENST00<br>0005816<br>69.1                    | 14 | 0.009  | 28.2 | 2 | TGCTGGTGGTGAAGCTCCCTCTCTCCGAGCACTGGGCCCTGCCTGGGGTAA<br>GGCT                                                                            |
| co3_97<br>08441_<br>x2 | CM0006<br>70.2/561<br>21352-<br>5612124<br>2 | 31 | 4E-10  | 54   | 2 | ACCAAGATTCAAGTCACATTCCGAGTGTCCCGGTGTGCTAGGGCACTTGCCAG<br>AGAATCTGCTGGTCTTGATTCACTGGTGGGGCAATCGGTGCCCAGATTAGG<br>AACATGC                |
| co3_97<br>08937_<br>x2 | ENST00<br>0003838<br>65.1                    | 17 | 0.0001 | 34.2 | 2 | GTGGAGGTCTATTCCAATGGGGCTTTTCCTGTAGCTGCATGTTGTTGGAAACT<br>CCTCATA                                                                       |
| co3_97<br>10099_<br>x2 | ENST00<br>0003911<br>96.1                    | 45 | 6E-16  | 73.8 | 2 | GATCACGGTGATGGCTGACCAGGGCTCCCTGACCTATACAGGCCTCTGCTAT<br>GGGGGTGA                                                                       |
| co3_97<br>10481_<br>x2 | CM0006<br>78.2/122<br>97323-<br>1229719<br>7 | 15 | 0.003  | 30.2 | 2 | ATTACTTGAAAATCACTCCCAGGCTTTGGCCATGGCAGCAGGTGAGATTCAA<br>GGCCCAGAGCCTCCAGGGCCTCAGCTCACCGCACACTGCCCCGTGTGTGGT<br>GGGAAACCCAGACCCCAACAGGT |

|                        |                                              |    |        |      |   |                                                                                                                                           |
|------------------------|----------------------------------------------|----|--------|------|---|-------------------------------------------------------------------------------------------------------------------------------------------|
| co3_97<br>11173_<br>x2 | CM0006<br>79.2/350<br>54494-<br>3505438<br>8 | 15 | 0.002  | 30.2 | 2 | ATTATTTTGTGTTTCATAAGTGTAATGATTGGATTTTCATGCACATGTATGAGAT<br>GTGCCTCCATCAAGCCTTGTTACTACAAAGTCAGTGCATTACCCATCTGATG                           |
| co3_97<br>13057_<br>x2 | ENST00<br>0003645<br>95.1                    | 29 | 0.0002 | 34.2 | 2 | AGCCTCCTGGTGCTCAGCACAGGATGTGTTCTTACCCTAACCAAATAGAAAGA<br>GTAGGCT                                                                          |
| co3_97<br>15043_<br>x2 | CM0006<br>69.2/664<br>34507-<br>6643461<br>8 | 16 | 0.0006 | 32.2 | 2 | AGCCTCCCAAAGCACTGGGAGTGTGATGACTAGGTTTTCCACTGGGTTTTTC<br>ATGTGTGAGATATGCCTTGCTCAAACCTTGTTACAGCACTGGCACATTGCCTG<br>TCGGATG                  |
| co3_97<br>19117_<br>x2 | ENST00<br>0003639<br>15.1                    | 22 | 1E-07  | 44.1 | 2 | TCCCAATGATGAGTTGCCATGCTAATACTGAGCCACCAGGTAGGGCAGTGTT<br>GCCCTGGT                                                                          |
| co3_97<br>19989_<br>x2 | ENST00<br>0003840<br>04.1                    | 23 | 5E-08  | 46.1 | 2 | TTCTAAAGTGTTGAGTTCAGTCCAGGGTGGATCCCCTGCTCTGTTAATTGAAC<br>TGGAACA                                                                          |
| co3_97<br>23867_<br>x2 | CM0006<br>85.2/714<br>40644-<br>7144051<br>7 | 20 | 0.0007 | 32.2 | 2 | ATCTTTTTGTAGTTCATAAGCTTATGATGACGTAAGTGTGACGACATTGGGTTT<br>TCACGTTTCATGTGTGAGATGTGCCTCCCTCAAGCCTTATTACAATGCCAGTAC<br>ATTTTTTTTCCACATCTGATG |
| co3_97<br>24929_<br>x2 | CM0006<br>82.2/564<br>75643-<br>5647574<br>5 | 15 | 0.007  | 30.2 | 2 | ATTCTTTAGTAGTTCATAATGCTATGATTGGGTTTCCATGTGCACATGTAAGAT<br>GTGCCTCTCTCAAGCCTTGTTGTGACATCAGCACATTACCCATCTGATG                               |

|                        |                                                |    |        |      |   |                                                                                                                                           |
|------------------------|------------------------------------------------|----|--------|------|---|-------------------------------------------------------------------------------------------------------------------------------------------|
| co3_97<br>28625_<br>x2 | CM0006<br>72.2/101<br>371952-<br>1013718<br>52 | 33 | 0.0004 | 34.2 | 2 | ATCCTTTTGTAGTTTGTAAAGCATGACGATTGGGTTTTTCAGCCTCATGTGTGAG<br>GTGTGCCTCCCTCAAACCTTGTTACATAGGCACATTACCTGTCTGGCA                               |
| co3_97<br>33119_<br>x2 | AC10476<br>3.12/682<br>86-68156                | 20 | 2E-06  | 40.1 | 2 | UGCCUCUCUCCCAUGGGCUUUGGGGGGUCCCUGUUCUCCUUAGCCAAGGC<br>UGGAGGCCAAGAGCAGCCCUCGAGGAUCGUCGUCAGGACUGCCACGAGUG<br>GGCAGCCUUGUUUCCUGCCUCAGACAUGU |
| co3_97<br>37289_<br>x2 | ENST00<br>0005163<br>13.1                      | 15 | 0.006  | 30.2 | 2 | AAGATTCGACAGATAACCCTACTGCCTCTCTTTGTGGCGGCGGGGCTCAGGCT<br>GCAGCACC                                                                         |
| co3_97<br>38139_<br>x2 | CM0006<br>78.2/188<br>70269-<br>1887016<br>6   | 19 | 0.006  | 30.2 | 2 | ATCCTTTTGTAAATACATAAGCATAATGATTGGGTTTTTATTTTCACATGTTTGTAT<br>ATGCCTCCCTCAAATCCTCTTATGATGTCAGCACATTACCCATCTGAGG                            |
| co3_97<br>42435_<br>x2 | ENST00<br>0003844<br>48.1                      | 15 | 0.003  | 30.2 | 2 | GGCCTCCTGGTGCTTACAAGCAGCTGTGTGCTTGCATTGACTGTACAGAAAA<br>AAAGAGAT                                                                          |
| co3_97<br>43871_<br>x2 | ENST00<br>0004102<br>53.1                      | 15 | 0.002  | 30.2 | 2 | TGGACCAATGATGTGAATGGAATGCATCTGAATAAAAATTATGATCAATCAGTT<br>TTTGGAT                                                                         |
| co3_97<br>45063_<br>x2 | ENST00<br>0003626<br>03.1                      | 27 | 0.004  | 30.2 | 2 | GTGCATGTACTGTTACAATCTAACTGAAGTATTTTATTGTTACCCCTGCTTAAA<br>GCAGTA                                                                          |
| co3_97<br>56573_<br>x2 | ENST00<br>0004588<br>63.1                      | 31 | 2E-05  | 38.2 | 2 | ATCCTGTTGTAGTTCATAAGCATGATGATTTGGTGTTCACGTGCATGTGTGGG<br>ATGTGCC                                                                          |
| co3_97<br>57403_<br>x2 | ENST00<br>0003909<br>81.1                      | 26 | 8E-10  | 52   | 2 | ACTGAGGAATGATGACAAGAAAAGGCCGAATTGCAGTGTCTCCATCAGCAGT<br>TTGCTCTC                                                                          |
| co3_97<br>60825_<br>x2 | ENST00<br>0005167<br>92.1                      | 19 | 0.004  | 30.2 | 2 | GAGGAGGTCCATTTTAAAAAAGAATAGATTGAAATGCCTCATAGAGTAACTC<br>TGTGGTT                                                                           |

|                        |                                              |    |        |      |   |                                                                                                                                               |
|------------------------|----------------------------------------------|----|--------|------|---|-----------------------------------------------------------------------------------------------------------------------------------------------|
| co3_97<br>66385_<br>x2 | CM0006<br>64.2/709<br>30415-<br>7093030<br>3 | 15 | 0.002  | 30.2 | 2 | GTCCTTTTGTAGTTCTTCAGCAGGATGACTGGGTGTTTCATGCTCCTATGTGAG<br>ATGTGCTTTTCTCAAACCTCAAACCTTGCTGGCAAGCAGTGAGTCAAGGCTGT<br>TCTGAGT                    |
| co3_97<br>69245_<br>x2 | ENST00<br>0004591<br>24.2                    | 22 | 1E-07  | 44.1 | 2 | GTGTTCAATGATGATTTCTATTTGTTTGCCTGATTTCTTTTGGATAATGAAGG<br>CATCTT                                                                               |
| co3_97<br>74633_<br>x2 | CM0006<br>64.2/754<br>89576-<br>7548971<br>0 | 14 | 0.008  | 28.2 | 2 | CTGTGTGTAGAAATGTTTGTCTCTATCCTTTGGGAACAGGAATACATTCAT<br>AACATGCTACATGTAAAAAGGACTCCCCAGGGTGGCCAATCTTATGGTAGAG<br>GTTGTATGGTAATATATTTCTCCTTCATAA |
| co3_97<br>76839_<br>x2 | ENST00<br>0003843<br>70.1                    | 25 | 0.0003 | 34.2 | 2 | CTGCAACCAATTAAGCTGACTGAATTCCTTTCTCCCGGGGGCCAGGTGTGC<br>AATGGCTG                                                                               |
| co3_97<br>79939_<br>x2 | AB06184<br>2.1/1832-<br>1898                 | 35 | 5E-15  | 69.9 | 2 | UGGCGAUGAGGAGGUACCUAUUUGUGUUGAGUAACGGUGAUAAUUUUUAUAC<br>GCUAUUCUGAGCCAGCA                                                                     |
| co3_97<br>84327_<br>x2 | AF25084<br>1.1/1768<br>78-<br>176958         | 14 | 0.009  | 28.2 | 2 | GGGGCAAUAUGGAGAUGUUUAUUAUUGUCUUCGACAGGGAAGAUGACAUAAAA<br>AUUAUGUUCAAUAGGAUUUAUGUGGAGACUU                                                      |
| co3_97<br>91267_<br>x2 | CM0006<br>77.2/406<br>07312-<br>4060721<br>2 | 19 | 0.004  | 30.2 | 2 | ATCTTTTCGTAGTTTCATAAGTGTGATTGGGTTTTTCACACGCATGTGTGAGATGT<br>GCTTTCTTCAAACCTTTGTTACGATGTTGGCACATTATACATCTGACA                                  |
| co3_97<br>93117_<br>x2 | CM0006<br>84.2/249<br>01214-<br>2490114<br>7 | 19 | 0.007  | 30.2 | 2 | CCGCAGTGACAGCAATATTTTTTCATCCACAGTTCACCTCATGAATGTTGTAC<br>TTTGGGTCTGAGTGA                                                                      |

|                        |                                                |    |        |      |   |                                                                                                                                         |
|------------------------|------------------------------------------------|----|--------|------|---|-----------------------------------------------------------------------------------------------------------------------------------------|
| co3_97<br>93625_<br>x2 | ENST00<br>0003908<br>33.1                      | 23 | 4E-08  | 46.1 | 2 | TGTGAGAGTGATGAGTTGCACACTGGTGGAGCCATGGTATCAGGTGATACAG<br>GCACCACT                                                                        |
| co3_97<br>97917_<br>x2 | ENST00<br>0003632<br>19.1                      | 15 | 0.003  | 30.2 | 2 | TGAGCAAGCGATGACAGCCGGTGGTGTGTGAGTCATGGAGGATGAATACTAA<br>GTGCCTGG                                                                        |
| co3_98<br>04627_<br>x2 | CM0006<br>64.2/183<br>064346-<br>1830642<br>35 | 24 | 3E-06  | 40.1 | 2 | GCAGACTCCCTCAGCATCCAGCGGGTGCTTTTTCGGTCTGCCAGTGAGCATT<br>CCATGGTGCTGTGACCATTTTGACCTCTCTAGGGTGATGCAGCTGCCTGGGG<br>ACACAGAG                |
| co3_98<br>07709_<br>x2 | ENST00<br>0003624<br>93.1                      | 24 | 1E-08  | 48.1 | 2 | AGGCAGGATCTAGTTACATTGTAGCTGTGAAGTGCTGCATTGTCTTTGCCCC<br>TGCTCAA                                                                         |
| co3_98<br>16233_<br>x2 | CM0006<br>72.2/100<br>019594-<br>1000196<br>99 | 27 | 0.003  | 30.2 | 2 | GTCATTTTGTAGGTCATAAGCATGATGATTGAGTTTTTCATGCTCATGCGTGAG<br>ATGTACCTCCCTCAAACCTTGCTACAACATTGGTAATGTACCAATGTCTGACA                         |
| co3_98<br>18833_<br>x2 | AADB02<br>016115.1<br>/24955-<br>25031         | 15 | 0.005  | 30.2 | 2 | UGGACCAAUGAUGAGACAGUGUUUAUGAACAAAAGAUCAUGAUUAAUCCAG<br>UUCUGCACAAAACACUGAGGUCCAUU                                                       |
| co3_98<br>24971_<br>x2 | CM0006<br>66.2/139<br>436494-<br>1394363<br>68 | 21 | 1E-06  | 42.1 | 2 | ATTGGTTGAAAATCACCCCCGGCTTTGGCCATGGCAGCGGGTGAGATTCCGG<br>CGCCCAGAGCCTCCAGGGGCCTCAGCTCACCGCACGCTGACACATGTGCGG<br>CGGTGAAACCCAGCCCCAACAGGC |
| co3_98<br>28857_<br>x2 | ENST00<br>0006275<br>61.1                      | 17 | 0.0004 | 34.2 | 2 | GCGCTGCCTTTGTACCCACCGTGCCTCCGCCTGGTGTCTGGGGTCAGGTT<br>GCAGTGCCA                                                                         |
| co3_98<br>33797_<br>x2 | CM0006<br>73.2/628<br>54285-<br>6285416<br>1   | 14 | 0.009  | 28.2 | 2 | CTCCAATGAGGAGGAAACATCCTGCCTTACCCCTGTTTTAGCCTGGGAACCA<br>GTAATTGTGAACTCACCAGGGTTAACATGAAGAGGGCATGAGAGCTTATTCCA<br>TAAGGAATTGTCTGAGACAT   |

|                        |                                              |    |        |      |   |                                                                                                                                                                                                                                      |
|------------------------|----------------------------------------------|----|--------|------|---|--------------------------------------------------------------------------------------------------------------------------------------------------------------------------------------------------------------------------------------|
| co3_98<br>35943_<br>x2 | AF25084<br>1.1/1432<br>08-<br>143289         | 28 | 6E-11  | 56   | 2 | GGGUCAAUGAUGAGAACCGUAUUAUUGUCCUGAAGAGCGGUGAUGACUJAA<br>AAAUAAUGCUCAAUAGGAUUACGCUGAGGCC                                                                                                                                               |
| co3_98<br>36487_<br>x2 | ENST00<br>0003842<br>75.1                    | 21 | 0.0004 | 34.2 | 2 | TGCAGCTGTGTCAAATTTGGTGCCTGCCCTGCCTGTGTAGGCACTGACCCAG<br>AAGGCTGC                                                                                                                                                                     |
| co3_98<br>40517_<br>x2 | CM0006<br>72.2/267<br>89017-<br>2678915<br>7 | 15 | 0.003  | 30.2 | 2 | CCTCATTTCCTTGGCAGGAACCTTGTAGTCCCCTGTTATGTACAGAGGC<br>AAAGGGAAGAGCTCTGGCCCCCTTGGCATGTCTTTGGAGCCATGCAGCTTCC<br>CGTCTGCCAGTTCTATCCTCAAGCACCAGGACACCA                                                                                    |
| co3_98<br>42255_<br>x2 | ENST00<br>0003647<br>64.1                    | 14 | 0.009  | 28.2 | 2 | GGGTCAATGATGAGATGTTACCTTGAAGAGAAATGATGACGTAAAAATTAAGT<br>TCAGTTG                                                                                                                                                                     |
| co3_98<br>44811_<br>x2 | CM0006<br>65.2/608<br>56605-<br>6085638<br>9 | 15 | 0.008  | 30.2 | 2 | AAGATTATATTTCCAGGGTCAATTTCTGTGGTTCATTAATAAGGAGTTTCCC<br>CAAGTGTGTAGAGCACTGGAAACCACAGGAAGATATGCAATGTTCTCTCCCG<br>AGCACGAAGCTCGTTCTTGGTGTGCTTCATTGCAACTGCCATTTGCCATTGA<br>TCATTGTTTTTTCTTCTTTGGGGAGATTAAGAGGAAGAGGACACAGTCTGA<br>GTGAT |
| co3_98<br>57099_<br>x2 | AC00702<br>5.2/1358<br>7-13714               | 14 | 0.008  | 28.2 | 2 | CAGCACUGCCAAGUGACCCAUUGGGCUCCAUCUUGACCAACUGGGCAUCA<br>AGCGGUGCAAAGCAAUCCUCUCAAGCUGGGAGAGUCACACCGUGGG<br>CUACUCCUGCAUGCAGCUGGGUACAUAU                                                                                                 |
| co3_98<br>62255_<br>x2 | ENST00<br>0005170<br>59.1                    | 16 | 0.001  | 32.2 | 2 | TCAAATGAGCCTGAGCTGACATTGTAGAGGATGTAGATGGCTGAAGAACTG<br>TTCAGCTG                                                                                                                                                                      |
| co3_98<br>65421_<br>x2 | ENST00<br>0003911<br>26.1                    | 15 | 0.004  | 30.2 | 2 | GGGTCATGAGGAGGTTTGTAGACATAAAAATTATGCTCATAAGTATTATGCTG<br>AGACCC                                                                                                                                                                      |
| co3_98<br>65425_<br>x2 | ENST00<br>0005172<br>63.1                    | 15 | 0.005  | 30.2 | 2 | TGATGACACTCTCTGGAATTGTTACTACTACCATAATTAAGTGCCTGAATCTT<br>TTTCTA                                                                                                                                                                      |

|                        |                                                |    |        |      |   |                                                                                                              |
|------------------------|------------------------------------------------|----|--------|------|---|--------------------------------------------------------------------------------------------------------------|
| co3_98<br>66683_<br>x2 | ENST00<br>0003912<br>84.1                      | 23 | 0.003  | 30.2 | 2 | ACCTCTGCTGGGGTGTTTAAAGGTCAGCGCTGTAGATATTCAGCATCTGGCA<br>TCTTGGCT                                             |
| co3_98<br>77153_<br>x2 | ENST00<br>0004087<br>46.2                      | 15 | 0.002  | 30.2 | 2 | AAGACTTTATCCCCCACCCCGCAAAGAAAAGGAAGAAGAAGAGTTTTTAAAT<br>GGCGCAG                                              |
| co3_98<br>88217_<br>x2 | ENST00<br>0005166<br>18.1                      | 16 | 0.001  | 32.2 | 2 | TATAAATGTGATGAATTGCACACTCGCAGAGTCATAGCATTAGGGGATGCAG<br>GCAGTGTT                                             |
| co3_98<br>91115_<br>x2 | ENST00<br>0005164<br>40.1                      | 36 | 0.001  | 32.2 | 2 | GTTGAGGTCTAACACGATAGGGCTTTATCTGTAGCCACACCATCTGGAAACAT<br>CTAGTGT                                             |
| co3_98<br>92605_<br>x2 | ENST00<br>0005161<br>78.1                      | 17 | 0.0001 | 34.2 | 2 | GTGTGGGATGTGTGTCTAAACACGACAATCTGAAGACAGAGGTGTAGAAATT<br>GGCAAGTT                                             |
| co3_98<br>98399_<br>x2 | CM0006<br>64.2/232<br>678963-<br>2326790<br>65 | 14 | 0.009  | 28.2 | 2 | ATCCTTTTGCGGTTCCATAATGTGATGACTAGGTTTTTCATGTCCATGTGTGAAGT<br>GCGCCTTCTCCAATCCTGTTAAGATGTCAGCACATTTGCCTTCTGACA |
| co3_99<br>03973_<br>x2 | CM0006<br>69.2/561<br>00659-<br>5610075<br>2   | 14 | 0.009  | 28.2 | 2 | ATCCTTTTGTAGTTAAGTGTGATGACAGGGTTTTTCACACTCATGAAGTGTGCC<br>TCCCTCAAACACTGGTTGCATTGACACACTACCCATCTGACA         |
| co3_99<br>04717_<br>x2 | ENST00<br>0005162<br>02.1                      | 14 | 0.009  | 28.2 | 2 | AGGACGTCAAACCATCATAAAGTATAGATCTCCACAGGATGCCATAGTGAATA<br>GTGCTAT                                             |
| co3_99<br>04763_<br>x2 | CM0006<br>72.2/214<br>85638-<br>2148572<br>2   | 14 | 0.009  | 28.2 | 2 | AAGACTGTATTTTCAGAGCTCATTTCTGTAGTTCATTACTATGGAAGTTTCTGT<br>AAATATATAGAGGTCTACAAAACAAAAAAGT                    |

|                        |                                                |    |        |      |   |                                                                                                                                                   |
|------------------------|------------------------------------------------|----|--------|------|---|---------------------------------------------------------------------------------------------------------------------------------------------------|
| co3_99<br>06443_<br>x2 | ENST00<br>0003846<br>14.1                      | 15 | 0.004  | 30.2 | 2 | TTGCACAGTGAACACCCAAGTGTGCTTTATAGTTCCCTTGGCTTTGACCCTGT<br>GCTAGAG                                                                                  |
| co3_99<br>09739_<br>x2 | ENST00<br>0003912<br>56.1                      | 15 | 0.003  | 30.2 | 2 | GTGCCTAAGGTTAACACAGCGCCTTAAGAGGCTAACACAGAAGGGCAAAGTA<br>AGTCTCCA                                                                                  |
| co3_99<br>10211_<br>x2 | BC03658<br>2.1/1156-<br>1210                   | 16 | 0.0008 | 32.2 | 2 | GGGGUGAUGAAGGCCUGCACCUGGUCCCCUCCCCAACUCUGCUCUGCUCC<br>UGAAG                                                                                       |
| co3_99<br>16043_<br>x2 | ENST00<br>0003653<br>13.1                      | 15 | 0.003  | 30.2 | 2 | TTACCAAAAGTTAATGTTTTAGAGAATGCTTTGGTTAAAAAGCCTTTACCAAC<br>TTGGGC                                                                                   |
| co3_99<br>17627_<br>x2 | ENST00<br>0005165<br>40.1                      | 15 | 0.003  | 30.2 | 2 | CTGATTCTTTGTACTAGGATGCAAAGAAAACAATCCTTGTGCCTTCTATCTCT<br>CTTGGT                                                                                   |
| co3_99<br>27243_<br>x2 | CM0006<br>68.2/100<br>957160-<br>1009572<br>63 | 15 | 0.006  | 30.2 | 2 | ATCCTTTTGTAAATTTATAAGCATCATGGTTAGGATTTAATGCTCATATGTGAGC<br>TGAGCCTCCCTCAAACATTGTTAGGACATCAACACAATACCAGTCTGATA                                     |
| co3_99<br>27449_<br>x2 | CM0006<br>67.2/122<br>796088-<br>1227962<br>27 | 15 | 0.003  | 30.2 | 2 | ATTCTTTTGTGGCTCATAAGCTTGGGATTTTCACTAAACATTTTAACTCAT<br>GAGGTTGGGACTTCACATTAATCTCTAATCTTTGAGATTGCCTCCCTCAAACC<br>TTGCTACAGTATTGGCACATTACCCATCTCACA |
| co3_99<br>31167_<br>x2 | ENST00<br>0005159<br>87.1                      | 15 | 0.003  | 30.2 | 2 | GATCAGCTTTTCAAAGGTTTACTGCATTTTACCCTCCCTGATGGGGCTCAGTG<br>TGCGCAG                                                                                  |
| co3_99<br>31405_<br>x2 | CM0006<br>69.2/548<br>5395-<br>5485501         | 19 | 0.003  | 30.2 | 2 | ATCCTCCTATAGTTCCTCAATGTGATGACTGGGTGTTCACTCATTGGCGAG<br>ATGTGCCTCTCTCAAACCTTGTTAGATGCTGCAGACACATTACCCATCAGAT<br>G                                  |
| co3_99<br>41009_<br>x2 | ENST00<br>0005164<br>68.1                      | 28 | 0.001  | 32.2 | 2 | GGATTGACGATGACTTTAAAAAAAAAAAAATCTCATTGAAATCTGAAAAAATGA<br>GTGACC                                                                                  |

|                        |                                                |    |       |      |   |                                                                                                                                                               |
|------------------------|------------------------------------------------|----|-------|------|---|---------------------------------------------------------------------------------------------------------------------------------------------------------------|
| co3_99<br>43255_<br>x2 | ENST00<br>0004590<br>70.1                      | 15 | 0.005 | 30.2 | 2 | ATTGGTTGAATATCACCCCTGGCTTTGGCCATGGCCATGGGAGAGATTTGGC<br>ACCCAGAG                                                                                              |
| co3_99<br>45737_<br>x2 | ENST00<br>0004589<br>74.1                      | 22 | 1E-07 | 44.1 | 2 | TGGACCAATGATGAGACAGTGTTTATGAACAAAAGATCATGATTAATCCAGTT<br>CTGCACA                                                                                              |
| co3_99<br>48399_<br>x2 | CM0006<br>79.2/693<br>55283-<br>6935513<br>3   | 27 | 0.003 | 30.2 | 2 | TGCACCTGTTTGAGGAATAAAGGAATTA AAACTCCCAAAGAGGACAAATATT<br>AACAAAAATGTATGGACAGACGCAAAAAACAAATCCTCATTGCAACCCAGA<br>ACTAATTGTTTAGTATGATTTTTGACACATATAAGAAGGAGTATT |
| co3_99<br>53483_<br>x2 | ENST00<br>0004593<br>73.1                      | 19 | 0.004 | 30.2 | 2 | GTTGGTTGAAAATCGCCCCGGCTTTGGCCGTGGCCGCGGGTGAGATTCGG<br>CGCCAGAG                                                                                                |
| co3_99<br>57335_<br>x2 | ENST00<br>0005159<br>06.1                      | 19 | 1E-05 | 38.2 | 2 | TTCACAATGTCTATTGAAGGATCTCATCACCTTTAGAGAGCTGTGGTCATGCC<br>CCTTAAA                                                                                              |
| co3_99<br>60053_<br>x2 | ENST00<br>0006074<br>17.1                      | 20 | 2E-06 | 40.1 | 2 | CAGCATTGTGCAATGGCCTTTGGTTTTTCTTGTAACCAGTTAGGTCTGAAACC<br>AATGCAA                                                                                              |
| co3_99<br>67585_<br>x2 | ENST00<br>0003908<br>89.1                      | 27 | 0.004 | 30.2 | 2 | AAATAATTAATTTCTCCAATAGCTGGAGTTACTGGCAAATTGTTTAGTGCCA<br>AACATG                                                                                                |
| co3_99<br>69105_<br>x2 | CM0006<br>85.2/118<br>738055-<br>1187381<br>82 | 14 | 0.008 | 28.2 | 2 | TAGCACTGTTGCCTGAGCCATTGGTGCTCCCTGGTACTAGCTCAGTTTTAATG<br>CAGTGCAATAGGAATTCCTTTGTTTCCACAAGGCCTGTCTGTGGGCTGC<br>TCCTTCCCACAGTTGGACCTTG                          |
| co3_99<br>75207_<br>x2 | ENST00<br>0005781<br>83.1                      | 14 | 0.009 | 28.2 | 2 | AACATAGAGTACACATTTTCTGTTTTGTTAAGAATTATTCTCTTGCAGACCTAT<br>GTTTT                                                                                               |
| co3_99<br>80723_<br>x2 | ENST00<br>0005172<br>85.1                      | 15 | 0.002 | 30.2 | 2 | TTCCTAAAGATTCACAATGAACATTATTATTTAAGAGCTTTTTGAAGTGCAAAT<br>CCATGA                                                                                              |

|                         |                                        |    |        |      |   |                                                                                                                                                         |
|-------------------------|----------------------------------------|----|--------|------|---|---------------------------------------------------------------------------------------------------------------------------------------------------------|
| co3_99<br>82125_<br>x2  | ENST00<br>0005171<br>60.1              | 16 | 0.0008 | 32.2 | 2 | CTAGAAAAATTGAAGATTTGGCCACTCTGGAAACTGCTGAGGGCCCCATGTG<br>TAATGGCT                                                                                        |
| co3_99<br>83939_<br>x2  | ENST00<br>0003656<br>47.1              | 14 | 0.009  | 28.2 | 2 | AGACTCCCAGCTCTGCCAGTTACACTAGGCTTCGCCTGTGTGGCTTCTGTA<br>ATGGGGAG                                                                                         |
| co3_99<br>84365_<br>x2  | ENST00<br>0004592<br>78.1              | 14 | 0.009  | 28.2 | 2 | ATCCTTTTGTAGCTCATAAGCAGGATGACTGGGTTTTCCACTCAGGTGTGAG<br>ATGTGCC                                                                                         |
| co3_99<br>85511_<br>x2  | ENST00<br>0003651<br>89.1              | 23 | 0.003  | 30.2 | 2 | AGCCTCATTCTAGATGAGAATGGGTACTGCTGATCATGGTGTCCAAAAAATT<br>TATGTGG                                                                                         |
| co3_99<br>93327_<br>x2  | AC02349<br>0.5/1218<br>42-<br>121984   | 16 | 0.0007 | 32.2 | 2 | UUCUCAGGUCGCCAGUGCAGCCCCAAGAUGAGCCUGCAGUAUUUCCUUA<br>CAUGAUCUGGUCCUACUGUGGGCAGCGCUGCUGCCAGAGCCUGAGAGGA<br>UUAUGAAAACAUGGCAACGGAAGUGAGGCCAGGGGACACAGCA   |
| co3_99<br>94299_<br>x2  | AC09022<br>7.10/155<br>87-15444        | 20 | 2E-06  | 40.1 | 2 | CUUUCGGGUCCCCAUUGCAGCCCCCGGAUGAGCCCGCAGUAUUUCCUUA<br>UAUGAUCAGGUCCCCAUUGC GGGCGGCCGCUUGCCCGGAGCCUGAGAG<br>GAUUAUGAAAACGUGGCGAGCGAAAUGGGGCCAGGGGACCUGGAG |
| co3_99<br>95207_<br>x2  | CM0006<br>73.2/855<br>5016-<br>8555146 | 14 | 0.009  | 28.2 | 2 | GACCTCTCTCATAGGGCTGTAGGGGATCTTTTTCTCTTCAGCCAGGGTTG<br>GAGGCCAAGATGGCCCTTGAGAATCATCATGACTGCTGAGAGCTGGGCA<br>GCCTTGTTTACCTCCCTTGGGCATT                    |
| co3_99<br>98483_<br>x2  | ENST00<br>0005163<br>29.1              | 14 | 0.008  | 28.2 | 2 | AGCACTTGATGTTTTAACATGTGGACATTTATAGACAGGTTCAAAAAGTCCTC<br>TTGCAA                                                                                         |
| co3_99<br>98713_<br>x2  | CM0006<br>63.2/568<br>0952-<br>5681026 | 14 | 0.009  | 28.2 | 2 | CTCAGCTGGGCTTTTTTAAAGTAACAAGTGACTGGGCCACTGACATGTAAAGA<br>GGGAAGTGAGGTGCTCCTGGAG                                                                         |
| co3_10<br>001378<br>_x1 | ENST00<br>0006127<br>41.1              | 15 | 0.006  | 30.2 | 1 | CTACAATCAATTAAGCCACATGGGGCCTGGTGTGCAAGGGCTGCAAACAGCA<br>GCATCCTA                                                                                        |

|                         |                                              |    |        |      |   |                                                                                                                                                   |
|-------------------------|----------------------------------------------|----|--------|------|---|---------------------------------------------------------------------------------------------------------------------------------------------------|
| co3_10<br>003567<br>_x1 | ENST00<br>0005161<br>58.1                    | 16 | 0.0007 | 32.2 | 1 | ATATAGTTGGACTCAACACCTCTCTATCAGAAATGGACAGATCCAGATCATGA<br>AGAGATT                                                                                  |
| co3_10<br>003769<br>_x1 | CM0006<br>67.2/659<br>61319-<br>6596118<br>3 | 15 | 0.005  | 30.2 | 1 | TCACATTTTATCAACCAAATGAATTAGGGAAAAAAGTTCATGCCCAGGGGTGA<br>GACTATAGTGCCAGAACACTTGCTTGTGCATAATTAAGGCCACTTGCCCTCTT<br>CAGGTAGCCCTTTTAACTGGGAGCAAAGTGA |
| co3_10<br>006260<br>_x1 | CM0006<br>73.2/927<br>29415-<br>9272933<br>0 | 14 | 0.008  | 28.2 | 1 | GTCCATTTGCAGTTCATAAGTGTGATGACTGGGTTTTCCACACGTGAGAGAT<br>GTGTCTCCCTCAAATCTTATTACCCATCTGATG                                                         |
| co3_10<br>006288<br>_x1 | ENST00<br>0004593<br>16.1                    | 14 | 0.009  | 28.2 | 1 | TTGCATGAGGAAGTATCTGCTCTTCATTCCCTTTGGGAGGAGAAATACATCCAT<br>AACATGC                                                                                 |
| co3_10<br>009678<br>_x1 | ENST00<br>0005164<br>49.1                    | 15 | 0.005  | 30.2 | 1 | TCCCATCTCTTAAATAAAAAGATTTTTTTTTTAAGAAGTTGTACATGTGCAATG<br>GCTGCA                                                                                  |
| co3_10<br>011491<br>_x1 | CM0006<br>85.2/328<br>48005-<br>3284790<br>7 | 14 | 0.008  | 28.2 | 1 | ATCCTTTCGTAATTCATAAGCATGATTTGGGTGTTTATACTCAGATATGAGATA<br>AGCCTTCTCTAAACTTATGATGTTGGCACACTACCCATTTGATA                                            |
| co3_10<br>013325<br>_x1 | ENST00<br>0005163<br>20.1                    | 15 | 0.008  | 30.2 | 1 | GCCAGCAGTCGCCAGGTGTCTCTCACGCTGCTGGGAGAGGAATGTCTCGTC<br>TTCTTCATC                                                                                  |
| co3_10<br>015707<br>_x1 | ENST00<br>0003911<br>59.1                    | 22 | 0.009  | 28.2 | 1 | ATTTTACATAGCGCTGCAGATGTGGCTGCTGTGTACATTTGTGTTATTAGGT<br>GGCAGAG                                                                                   |
| co3_10<br>021566<br>_x1 | ENST00<br>0004081<br>98.2                    | 14 | 0.009  | 28.2 | 1 | AAGATGACACTTTGAGGCATCGTGTCTATGGTTCATTACTACAGAAGCTTCTC<br>TGGATGT                                                                                  |

|                         |                                                |    |        |      |   |                                                                                                                              |
|-------------------------|------------------------------------------------|----|--------|------|---|------------------------------------------------------------------------------------------------------------------------------|
| co3_10<br>022634<br>_x1 | ENST00<br>0003910<br>95.1                      | 19 | 0.004  | 30.2 | 1 | ATTCTTAAATGAATGATGAAATACCAAAAAGAAAAATAAGCAAAGAACAGATAA<br>CAGAAA                                                             |
| co3_10<br>023187<br>_x1 | CM0006<br>85.2/485<br>61801-<br>4856170<br>2   | 14 | 0.009  | 28.2 | 1 | ATCCTTTTGTAAATCAACAATGTGATGATTGGGCTTTCACACTTGTGTGAGATG<br>CACCTCGCTCAAACCTTGTTAACATCTGCACGGTACCTGTCTGAAG                     |
| co3_10<br>026103<br>_x1 | ENST00<br>0005163<br>10.1                      | 16 | 0.0008 | 32.2 | 1 | GTTGGATGAAAATCATCCCGGGCTTTGCCAGTGGCCGCGAGTGCCCAGAGC<br>TTCCAGGGG                                                             |
| co3_10<br>026839<br>_x1 | CM0006<br>84.2/176<br>41519-<br>1764140<br>6   | 15 | 0.005  | 30.2 | 1 | ATCCTTTTGCGGTTCATAAAGAACCAAGATGACTGGGTTTCATGCTAATGCAT<br>GACATGTGCCTCCCTCAAATCATGTTGCCTCATGGGCTTATTGGCACATTACC<br>GTCTGAGG   |
| co3_10<br>030747<br>_x1 | ENST00<br>0005160<br>84.2                      | 15 | 0.003  | 30.2 | 1 | TCCATTTTCAGAAAGCCGAGGTCAAATAATGAGTCCTGGGGAATTCAAACCTTG<br>TGTTAAG                                                            |
| co3_10<br>031791<br>_x1 | CM0006<br>63.2/204<br>727991-<br>2047281<br>06 | 16 | 0.0005 | 32.2 | 1 | CGCCTTTCTCCCATGGGCTGTGTGGGGTCCCTGTTCTTCGCAGCTAAGGCTG<br>GAGGCCAAGATCAGCCTTTGAGGACTGTCATCAGAATTGCCTTGCTTTCCTG<br>CCTCAGATGTGA |
| co3_10<br>032062<br>_x1 | ENST00<br>0005164<br>27.1                      | 17 | 0.0003 | 34.2 | 1 | GGTCTCTTGTGTCGGCACCTGGGTGGCTTGCCGCCACACAACCAAATTA<br>AAATAACA                                                                |
| co3_10<br>032252<br>_x1 | ENST00<br>0003650<br>37.1                      | 16 | 0.0007 | 32.2 | 1 | GGGTCAATGATGAGAACCTTACATTGTCCTGAAGAGAGATGATGACTTAAAA<br>TCATGCT                                                              |
| co3_10<br>038023<br>_x1 | ENST00<br>0003635<br>28.1                      | 15 | 0.004  | 30.2 | 1 | CAGTCAGTGTGAGAACCTTATATTGTTCTGAAGAGAGGTGGTACTTAAAA<br>TCATGCT                                                                |
| co3_10<br>040085<br>_x1 | ENST00<br>0005168<br>48.1                      | 15 | 0.003  | 30.2 | 1 | CTACAACCAGCTACTGGTTGATCTTACATTTGATCTGGTGTGCAATGGCTGCA<br>AACAGCA                                                             |

|                         |                                                |    |        |      |   |                                                                                                                                            |
|-------------------------|------------------------------------------------|----|--------|------|---|--------------------------------------------------------------------------------------------------------------------------------------------|
| co3_10<br>043969<br>_x1 | CM0006<br>63.2/136<br>96199-<br>1369607<br>0   | 15 | 0.003  | 30.2 | 1 | AGGACTTGCCTCATTAGTAATACAACCAAGCTGATAGGGTAGTTTGGCAGGA<br>CACACAGCCATTTCCCTCTCAGCTTAGGAAGGCTGTCATAAGACTAGGACTA<br>GCTCTGCAAGGCAAGAGAAGGACAAT |
| co3_10<br>048336<br>_x1 | CM0006<br>71.2/623<br>58285-<br>6235819<br>1   | 14 | 0.008  | 28.2 | 1 | CTACAATCAATTAAGCCACATGGGGCCTGGTGTGCAAGGGCTGCAAACAGCA<br>TCATCCTAGGTAGTGTACAGCAGCCTGTTCCCTTGCGTACAACA                                       |
| co3_10<br>051202<br>_x1 | CM0006<br>64.2/883<br>07360-<br>8830746<br>3   | 15 | 0.005  | 30.2 | 1 | ATCCTTTTGCAGCTCATAAGTGTGATGATTGGGTTTTCACACTCATGTGTAAG<br>ATGTGTTTCCCTCAAACCTTGCTATGATATCAGCACAGTACCTATCTGACA                               |
| co3_10<br>053017<br>_x1 | ENST00<br>0005162<br>07.1                      | 14 | 0.009  | 28.2 | 1 | GTTGGTTGTGAATAACCCTTGGCTTTGATTGTGGCTGTGGATGAAATTCAGCA<br>CCTACAG                                                                           |
| co3_10<br>059331<br>_x1 | ENST00<br>0003841<br>59.1                      | 15 | 0.003  | 30.2 | 1 | CTGCAGTCAATTAAGCCAGCTGTACTCCTTTCCTCACAGGGGCTCGGTGTAAT<br>GGCTGCA                                                                           |
| co3_10<br>062447<br>_x1 | CM0006<br>74.2/101<br>358849-<br>1013587<br>48 | 14 | 0.009  | 28.2 | 1 | ATGCTTCATAATTTATAAGTGTGATGGTTGGGTTTCTATGTTTATGGGTGAGAT<br>ATGTCTCCCTCAACCTTGTTACAACAGTTGGGCATTATCTGCCTGATG                                 |
| co3_10<br>063514<br>_x1 | ENST00<br>0004107<br>34.2                      | 15 | 0.005  | 30.2 | 1 | AGGACTGTGCTTTCAGAGTTCATGTCCACAGCTCATTGCGGGGGCAGTTTCT<br>CTGATCGT                                                                           |
| co3_10<br>063842<br>_x1 | ENST00<br>0004085<br>71.1                      | 20 | 0.0005 | 32.2 | 1 | GCAGACTCCCTCAGCATCCAGCGGGTGCTTTTTTCGGTCTGCCAGTGAGCATT<br>CCATGGTG                                                                          |

|                         |                                                |    |       |      |   |                                                                                                            |
|-------------------------|------------------------------------------------|----|-------|------|---|------------------------------------------------------------------------------------------------------------|
| co3_10<br>064028<br>_x1 | CM0006<br>83.2/416<br>04683-<br>4160458<br>6   | 15 | 0.004 | 30.2 | 1 | TTCCCTGTGACACATCAGCAGGATGACTGGGCTTTCATCCTCCTGGGTGGGA<br>CATGCCTCCCTCAAGCCTTGCTGCTGGGCACATTATCTGTCCAACA     |
| co3_10<br>067821<br>_x1 | ENST00<br>0003648<br>63.1                      | 14 | 0.008 | 28.2 | 1 | GATGCCTTCCGGAACATGCCAGCACCGCAGATGCTGGCAGTCTGCTGTGCC<br>CGTGATATT                                           |
| co3_10<br>067912<br>_x1 | ENST00<br>0004082<br>12.1                      | 15 | 0.007 | 30.2 | 1 | TGTTTAATGACTAAGGAAGGTCCCTGTCCCCGCCAGGGGCTGTGAGCAACAC<br>CATGGCTG                                           |
| co3_10<br>068360<br>_x1 | ENST00<br>0003649<br>61.1                      | 15 | 0.003 | 30.2 | 1 | GTGTTGATGATGAGAACCTTATATTATCCTGAAGAGAGGTGATGACTTAAAAA<br>TCATGCT                                           |
| co3_10<br>069328<br>_x1 | ENST00<br>0003643<br>94.1                      | 45 | 8E-21 | 89.7 | 1 | AATGAATGATGACAAAATGTTTCAGTCCCAAATGATACATACTGATTATACCAT<br>TATATT                                           |
| co3_10<br>073829<br>_x1 | ENST00<br>0005168<br>90.1                      | 24 | 1E-08 | 48.1 | 1 | CCTCTTCTCAGAACACTTCCTGGGTCTGATTGGTGGCCCAGGGAGCTGTGAG<br>AGAAGAGC                                           |
| co3_10<br>076055<br>_x1 | ENST00<br>0005170<br>61.1                      | 14 | 0.008 | 28.2 | 1 | GCTTAGGGAGGGTGCTCTGCCAGGTTCCAATCCTGGTTCCACTGCATATGA<br>GCCTTGTA                                            |
| co3_10<br>083072<br>_x1 | ENST00<br>0003629<br>63.1                      | 15 | 0.005 | 30.2 | 1 | GGGTGATGATGAGAACCTTATATTTTCTGAAGAGAGGTGATGACTTAAAAAT<br>CATGCTC                                            |
| co3_10<br>084484<br>_x1 | AC06935<br>1.5/3795<br>7-38002                 | 14 | 0.009 | 28.2 | 1 | AGCUGAAGAGCUGAUGAUGUCCCCUAAAGCUGAAGCUCUUAAGCU                                                              |
| co3_10<br>084901<br>_x1 | CM0006<br>67.2/119<br>069400-<br>1190692<br>97 | 14 | 0.009 | 28.2 | 1 | ATACTTTTTAGTTCATAAGTGGGATGATTGTGTGTTCACTTGTGTGAGACGT<br>CCCTCCCTCAAACCTTGTTGCGCCATCATCTGCACATTACCCATCTGATG |

|                         |                                                |    |        |      |   |                                                                                                                          |
|-------------------------|------------------------------------------------|----|--------|------|---|--------------------------------------------------------------------------------------------------------------------------|
| co3_10<br>085428<br>_x1 | CM0006<br>79.2/821<br>41663-<br>8214177<br>3   | 16 | 0.0006 | 32.2 | 1 | ATCCTTTTGTGGTTCATCCGCCTGATGATTGGGTTTTTCATGCAGACGTGTGAG<br>CTGTGCCTCCCTCAAGCCTTGTTACAACATCCGACATCCGCACATTACCTGTC<br>TGATG |
| co3_10<br>088162<br>_x1 | ENST00<br>0004081<br>17.2                      | 23 | 0.003  | 30.2 | 1 | AAGCTTGTACTCTCAGTGATCATTGCTGTAGTTACGAGATAAGCTTCTCTGAA<br>CATGCAG                                                         |
| co3_10<br>091319<br>_x1 | ENST00<br>0003649<br>02.1                      | 26 | 8E-10  | 52   | 1 | TGCAGTCAAGTCAAATTCAGTGCCCGTTTCTGTCATAGCGGGGGCTGGCCCA<br>GATGGCTG                                                         |
| co3_10<br>093728<br>_x1 | ENST00<br>0005159<br>66.1                      | 16 | 0.0008 | 32.2 | 1 | GCCCTATGTTAAAATTTTAATTCTGCACTTACTAACTATCTTGGGAACCTTGGG<br>CAAGTA                                                         |
| co3_10<br>096195<br>_x1 | ENST00<br>0003629<br>45.2                      | 15 | 0.003  | 30.2 | 1 | CCTGCCAGCTGCACAGATGCAGATGCTCTGCTATGCCTGTAACATCGGGGCG<br>AAGTGAAA                                                         |
| co3_10<br>098971<br>_x1 | CM0006<br>63.2/202<br>197731-<br>2021976<br>28 | 47 | 0.008  | 30.2 | 1 | ATACTTTTGTAGTTAAGAAGTGTGACAATTGGGTTTTTCGTGCTCACATGTGAG<br>AAGTGCCTCCCTCAAACCTTGTTATGAAGTCAGCACATTACTGGTCTTCTT            |
| co3_10<br>108121<br>_x1 | CM0006<br>69.2/129<br>061531-<br>1290616<br>34 | 19 | 0.005  | 30.2 | 1 | ATTCTTTTGTAGCTGATAAGCATGATGACTGGAGTTTCACGTGCATGTGTGAG<br>ATATACCTCCCTCCAACCTTGTTACCACATCTGCACATTACCTGCCTGATG             |
| co3_10<br>112589<br>_x1 | CM0006<br>75.2/110<br>414205-<br>1104143<br>06 | 14 | 0.008  | 28.2 | 1 | GTCCTTTTGTGGGTCATCAGCATGATGCTGGGGCGTTCACACTCGTGTGAGA<br>CATGCCTCTCTCAAACCTTGTTAAGATGTCAGCACATGACCCATCTCACA               |

|                         |                                                |    |        |      |   |                                                                                                                                                    |
|-------------------------|------------------------------------------------|----|--------|------|---|----------------------------------------------------------------------------------------------------------------------------------------------------|
| co3_10<br>115536<br>_x1 | CM0006<br>80.2/357<br>3043-<br>3572940         | 16 | 0.0006 | 32.2 | 1 | ATCTTTTTGTGATTCATCAGCATGATGATTGGGTCTTCACACAAAAGTTTAAGA<br>TGTGCCTCCCTCACATCTTATTATCGTGTGTCAGCATATTCCTGTCTGAAG                                      |
| co3_10<br>119633<br>_x1 | CM0006<br>65.2/474<br>66349-<br>4746644<br>8   | 14 | 0.008  | 28.2 | 1 | ATCTTCTGTAGTTCATCAGTATGATACCTGGGTGTTTCACACACATGTGAGAT<br>GAGTCATTCTTGAACCTTGTTATGATGTCAGCACTACCCATCTAACC                                           |
| co3_10<br>120475<br>_x1 | CM0006<br>63.2/224<br>336791-<br>2243368<br>89 | 37 | 0.0003 | 34.2 | 1 | ATCCTTTTGTAGTTCCTAAGTGTGAAGAATGGGTGTTTCATGCAGAAGGATAAG<br>ATGTGCTACCCTCAAACCTTGTTCCGTGCATATTACACGTCTGACA                                           |
| co3_10<br>121214<br>_x1 | ENST00<br>0005163<br>91.1                      | 15 | 0.003  | 30.2 | 1 | TGGTCAGGCTGTGGCTGTGGCACAGCACTTGGCTTTCTCCTGGGGGCACTG<br>GGGAGCCAT                                                                                   |
| co3_10<br>125715<br>_x1 | AC01074<br>6.8/1403<br>34-<br>140470           | 22 | 5E-05  | 36.2 | 1 | CUACCAAAGUUAAUUUUUUUAUGGGGAAGGCUUUCUAAAUAACCUUUACCA<br>AUUUGGGCUAUUUGGGAGAGUAAAGGAAAGACCACACUCCACAGCGGGCU<br>AUACCAAUAGUUCACUACUAAUUUUGUGGUCUACAUU |
| co3_10<br>127798<br>_x1 | CM0006<br>72.2/104<br>399790-<br>1043999<br>03 | 14 | 0.009  | 28.2 | 1 | ATATAATTGCAATTAATAATTACATGATTTGATCTTGACTGGGTGTTTCACATGT<br>ATGTGTAAGATATGCCTCCCTCAAACCTTATCACGATGTCGGCACATTACCCA<br>TCCAACA                        |
| co3_10<br>128686<br>_x1 | ENST00<br>0003910<br>93.1                      | 15 | 0.004  | 30.2 | 1 | TTTACAAGGGAAAAGCAACCCCATTA AAAAGTGGGCAAAGTAAGGTCTTTGG<br>GGAACAGG                                                                                  |
| co3_10<br>133677<br>_x1 | CM0006<br>84.2/225<br>17780-<br>2251787<br>5   | 15 | 0.002  | 30.2 | 1 | ATCCTTTTGTGAGGATAAGCGTGATGCTTGGGTTTTCACTCATGTGAGATGTG<br>CTTCCCTCAAACCTTGTTATATCAGCATGTTTAACATCTGATG                                               |

|                         |                                                |    |       |      |   |                                                                                                                   |
|-------------------------|------------------------------------------------|----|-------|------|---|-------------------------------------------------------------------------------------------------------------------|
| co3_10<br>135805<br>_x1 | ENST00<br>0005171<br>36.1                      | 15 | 0.004 | 30.2 | 1 | TGAGTTTTGGGATGAGACCCTGGAATAAGTGCTGGACACAGTGCCTGAATCA<br>GACTGTGG                                                  |
| co3_10<br>140685<br>_x1 | ENST00<br>0004594<br>45.2                      | 14 | 0.008 | 28.2 | 1 | TCATATATTAAGTGCTTTATAACGAATTCTTGCAAATGGATTTAACAGAACAT<br>GACGAC                                                   |
| co3_10<br>140765<br>_x1 | ENST00<br>0003649<br>41.1                      | 15 | 0.003 | 30.2 | 1 | GTCTGCATTTGAAAGTGATCATCAGCTAGCCTGTGTCTTCGTCATCGATAGTA<br>CAGGCCG                                                  |
| co3_10<br>141872<br>_x1 | ENST00<br>0003645<br>14.1                      | 14 | 0.009 | 28.2 | 1 | AGGCAACTCTTAGAAGATGGATAGCTTCTCTTTTGCTGTGGGTGTGGCCACAA<br>AACGTTT                                                  |
| co3_10<br>143386<br>_x1 | CM0006<br>83.2/444<br>39035-<br>4443911<br>0   | 14 | 0.008 | 28.2 | 1 | TGTTGACCTGCCTCCGTCCTCTGTCTGTCCAGGGCTCCCGGGAGCCAGGGG<br>AGATGCTACCTCGGAAGCTGAAGCG                                  |
| co3_10<br>145116<br>_x1 | ENST00<br>0004081<br>66.1                      | 14 | 0.008 | 28.2 | 1 | ACCAAGATTCAAGTCACATTCCGAGTGTCCCGGTGTGCTAGGGCACTTGCAG<br>AGAATCTG                                                  |
| co3_10<br>145687<br>_x1 | ENST00<br>0004596<br>13.1                      | 14 | 0.008 | 28.2 | 1 | ATTGGTTGAAAATCACCCCGGCTTTGGCCATGGCAGCGGGTGAGATTCGG<br>CGCCCAGA                                                    |
| co3_10<br>155696<br>_x1 | CM0006<br>65.2/163<br>178975-<br>1631788<br>74 | 14 | 0.009 | 28.2 | 1 | GTACTTTTGTGGTTCATAAGTGTGATATATGAGTTTTTCATGCTCATGTATGAGA<br>TGTGCCTCCCTCAAAGCTTAGGACTTCAGCACATTGCCTAATACGAAA       |
| co3_10<br>155821<br>_x1 | ENST00<br>0006200<br>99.1                      | 15 | 0.003 | 30.2 | 1 | TTTATCAATGGCATGATTTTAAAGCTGTTTCACCCGAGTACACAGCAGGGAAG<br>CCATCCT                                                  |
| co3_10<br>156256<br>_x1 | CM0006<br>66.2/183<br>582301-<br>1835821<br>95 | 15 | 0.004 | 30.2 | 1 | ATTCTTTTTTGGTTCATAAGTGTGATGATTTTCGTTTTTCATGTTAAAGTGTGAGAT<br>CAGCCTCCCTCAAACCTTGTTACTACATCAACACCACATTATCCATCCAATG |

|                         |                                              |    |        |      |   |                                                                                                                      |
|-------------------------|----------------------------------------------|----|--------|------|---|----------------------------------------------------------------------------------------------------------------------|
| co3_10<br>160679<br>_x1 | ENST00<br>0003629<br>87.1                    | 16 | 0.0005 | 32.2 | 1 | CATCTGTGATTATCCTATTCTGAACCTGAATTTCTACTAGAAAAACTTATATG<br>AATCTG                                                      |
| co3_10<br>176372<br>_x1 | KV88076<br>8.1/1215<br>368-<br>1215471       | 15 | 0.006  | 30.2 | 1 | ATCCTTTTGTAAATAGATAAGCATAATGATTGGGTTTTTATGTTACATGTTTGAT<br>ATGCCTCCCTCAAATCCTCTTATGATGTCGGCACATGACCCATCTGAGG         |
| co3_10<br>179296<br>_x1 | CM0006<br>75.2/209<br>69318-<br>2096941<br>6 | 15 | 0.006  | 30.2 | 1 | ATCATTTTGTACCTTTTAAAGCATGACCATTGGGTTTTTCACTCATATGGGAGG<br>TGCCTCCCTCAAACCTTTGTTACATTGGCACATGACTCATCTGATG             |
| co3_10<br>184894<br>_x1 | CM0006<br>83.2/393<br>45457-<br>3934535<br>1 | 15 | 0.005  | 30.2 | 1 | ATCCTTTCATAAGCTTGAAGATTGGGGTTTTCACGCTCATGTGTGAGATGTCCC<br>TCTCTCAAACCTTACTATGAAGTCAGCACCACTGGGCACATTACTTGTCTGAC<br>A |
| co3_10<br>186261<br>_x1 | ENST00<br>0003632<br>80.1                    | 18 | 0.009  | 28.2 | 1 | TGAATCAATGGTGACCACTGGTGGCATATAAGTCATGGATGATGAATATGAGA<br>AGAAAAG                                                     |
| co3_10<br>196913<br>_x1 | ENST00<br>0005158<br>95.1                    | 19 | 0.004  | 30.2 | 1 | CAGACTTACAGATAAGTTCGAGAAATAAACCTGTTTTGCAACCCAGAGCACA<br>TTGTTCA                                                      |
| co3_10<br>197121<br>_x1 | ENST00<br>0003911<br>12.1                    | 15 | 0.004  | 30.2 | 1 | ATACTATGATGGTTGCATAGTTCAGCAGATTGAATTCATGAAGAGATTTACAAT<br>GTCTGA                                                     |
| co3_10<br>198179<br>_x1 | CM0006<br>63.2/174<br>49763-<br>1744986<br>3 | 15 | 0.003  | 30.2 | 1 | ACACTTATGTGGTTCATAAAAGTGATTGAGTTTTTTCATGTTTCATGTGTTGAATGT<br>GCCTCCCTCAAACCTTGTTAAGTCATCAGCACATTACCCATTTGATG         |

|                         |                                                |    |        |      |   |                                                                                                                                                 |
|-------------------------|------------------------------------------------|----|--------|------|---|-------------------------------------------------------------------------------------------------------------------------------------------------|
| co3_10<br>200244<br>_x1 | CM0006<br>69.2/138<br>176154-<br>1381762<br>82 | 15 | 0.002  | 30.2 | 1 | ATCTTTTTGTAATTCCTAAGCATGATGGTTGATTCGGCTCTCACACTTGATGAT<br>TGGGCTTTCACTTGGATCTGTGAGATGTGCCTCCCTCAACCCTTCCTGCGAA<br>GTCAGCACATTACCTGACAGAAA       |
| co3_10<br>201741<br>_x1 | ENST00<br>0003842<br>31.1                      | 15 | 0.004  | 30.2 | 1 | CTGCAGCCAATTGAGTTGACCGAGCTCTTTTCCTCCTGGGGGCTTGGTGTGC<br>AATGGCTG                                                                                |
| co3_10<br>202035<br>_x1 | AC00922<br>8.4/5936<br>1-59234                 | 14 | 0.009  | 28.2 | 1 | UGGCAUGAUUUCCUGCAGGUUGAGCUCAGCCAAGUACCACCCUCAGUAA<br>GCCUAGAGUAGAGGGGCCUGACAUCUUUCCUUAAAUAACAAGGAGCCU<br>UAUCCAGGUUGUCCUAGUCUCAUACUU            |
| co3_10<br>202388<br>_x1 | ENST00<br>0003912<br>91.1                      | 20 | 0.0006 | 32.2 | 1 | CACTAGAAGACAGAATTCACAGAAGTAGCATTTCACCTTTTGCCTTTACAGAA<br>GTATATT                                                                                |
| co3_10<br>205575<br>_x1 | ENST00<br>0005160<br>35.1                      | 17 | 0.0002 | 34.2 | 1 | TTTCTATTTTATCTGATTCTTCCTCTATGCACAACTCAGCTTCAGTCATTAGTA<br>TCATT                                                                                 |
| co3_10<br>205607<br>_x1 | CM0006<br>71.2/942<br>33478-<br>9423358<br>1   | 14 | 0.009  | 28.2 | 1 | ATCCTTTTGTATCTCATAAACATGATGATTGGGTTTTTCACACACACATGTAAGA<br>TGTGTCACCATCAATCCTTGTTATGACATCAGCACATTACCCATCTAACA                                   |
| co3_10<br>207715<br>_x1 | CM0006<br>63.2/173<br>660200-<br>1736600<br>97 | 14 | 0.008  | 28.2 | 1 | ATCCTTTTGTAAATTCATAGGTGTGATTATTGGGTTTTTCATGCTCATGTGTGAGA<br>GGTACCTCCTTCAAACCTTGTTACAACACGGGCACATTTCTGTCTGTTG                                   |
| co3_10<br>208128<br>_x1 | AC01112<br>0.11/127<br>524-<br>127388          | 19 | 0.005  | 30.2 | 1 | CAGACAUUCAUUUUUAUCCAGUUUCUUCUCAAGUGAAGUAACUUUUUGU<br>AAAUGUCCUAAAGUCAUGUAGAAUGUAGUAGCUUUCUGUUCACACUGUACA<br>AAUAAAAAGGAUGGAUCAUUCUACAACUGACAUUA |
| co3_10<br>214535<br>_x1 | ENST00<br>0005166<br>32.1                      | 20 | 3E-06  | 40.1 | 1 | AGGGGTGGTCTCCTCCCTTACTCTTTGGGAACTCAGATTGGCCTTATGGTGG<br>CCTCTCTT                                                                                |

|                         |                                              |    |        |      |   |                                                                                                                                                          |
|-------------------------|----------------------------------------------|----|--------|------|---|----------------------------------------------------------------------------------------------------------------------------------------------------------|
| co3_10<br>216520<br>_x1 | CM0006<br>65.2/861<br>25216-<br>8612528<br>7 | 14 | 0.008  | 28.2 | 1 | AAATGTTATGATATGAGCAAAATGTTCAACTATTCCAAATGGGCTGAGTGAAA<br>ATAGGTTTTCTGAGCATCC                                                                             |
| co3_10<br>217693<br>_x1 | CM0006<br>77.2/918<br>35379-<br>9183547<br>6 | 14 | 0.008  | 28.2 | 1 | CTCCTTTTGCGGTTTATAAGCATGATGATTGGGTTTTTCATGTGTGAGATGTGT<br>CTCCCTCAAATCTTTTTATGAAGTAGATGCATTGTCTGTCTGACA                                                  |
| co3_10<br>217729<br>_x1 | CM0006<br>72.2/687<br>12958-<br>6871305<br>5 | 14 | 0.008  | 28.2 | 1 | ATCTGTTTGTAGTCATAATTGTGATGGTTGAGTTTTTCATGTGTGAGATGTGTAT<br>CACTCAAGCCTTTTTACAATGTCGGTATATTGCCGGGTGCGGTG                                                  |
| co3_10<br>223655<br>_x1 | ENST00<br>0004593<br>50.1                    | 24 | 0.0009 | 32.2 | 1 | ATCCTTTCACAGTTCATAAGAGTGATGACTGGGTTTTCACTTTCATGTGTAAGA<br>TGTGCC                                                                                         |
| co3_10<br>229144<br>_x1 | CM0006<br>65.2/321<br>72656-<br>3217275<br>5 | 15 | 0.008  | 30.2 | 1 | ATCCTTTTGTGGTTGATAAGTGTGATGATTCAGTTTTTCATGCTCATGTATGAGA<br>TGTGCCCCCAATCAAACCTGTCACAACATCTGCTTATTATCAGACA                                                |
| co3_10<br>231700<br>_x1 | AC00483<br>0.1/5888<br>6-58743               | 14 | 0.008  | 28.2 | 1 | CUAUCAAAAGUUACUUUUUGUGGGGUGGAAGUUUUUAAAAUAACCUUUUACC<br>UACGUGGGCUGUUUUGGAAAAUAAAGAAAAGACCACACUCAGCAGAGGGCU<br>AUACCCCUUAGUAUAGUUCACCACUUUUUGCAGCUUAUAUU |
| co3_10<br>234184<br>_x1 | ENST00<br>0003655<br>09.1                    | 15 | 0.003  | 30.2 | 1 | ATAAACAAAAGAACACCAATTGTGCTCCTTTCCTCCTGGGGCCCAGTGTGCAA<br>TGGCTGC                                                                                         |
| co3_10<br>239247<br>_x1 | ENST00<br>0005171<br>84.1                    | 15 | 0.004  | 30.2 | 1 | TGGTTTAAAGCCAACTCTGGGCTCCCATCAGAAGGAAGGAGATGAATGCTAT<br>GACCAAAG                                                                                         |
| co3_10<br>239584<br>_x1 | ENST00<br>0003911<br>77.2                    | 14 | 0.008  | 28.2 | 1 | AAGACGACGCTTGCAGGGATTGTTTCTATAGCTCACTACCAGATAAGTTTCTC<br>CGAACAT                                                                                         |

|                         |                                                |    |       |      |   |                                                                                                                                                     |
|-------------------------|------------------------------------------------|----|-------|------|---|-----------------------------------------------------------------------------------------------------------------------------------------------------|
| co3_10<br>241922<br>_x1 | AJ60947<br>2.1/1-140                           | 15 | 0.006 | 30.2 | 1 | UUUCUCAUUUGACUACCACAUUUUCUCCUAAUAAUAGAUUUUAGUGGCUAU<br>GCUUAUGGGAUAGAUUAAACUUGCCAUGAUCUGAAGAGGGAGGGUUUUUU<br>CAUGUCCUCCUCCUAUAUGAAAUGGCUGAACGGAUUUA |
| co3_10<br>243836<br>_x1 | ENST00<br>0004591<br>41.1                      | 16 | 0.001 | 32.2 | 1 | TCCTCACATGGGATAATTTTTACTTTATTCTCCCTTTGGAGGTCAGGTTAAAC<br>AAGATT                                                                                     |
| co3_10<br>245707<br>_x1 | CM0006<br>63.2/286<br>89665-<br>2868979<br>4   | 31 | 2E-05 | 38.2 | 1 | TGGACATTTATTTTTATTCAGTTTTTTCTCAAGGTGAAGGTAAGTGTGATGAT<br>GTCCTAGAGAAATATTGTAGCTTTCTGTTACCCTTTGCAACTAAAAAGCATG<br>GACTGTTCCACTACTGAGATTT             |
| co3_10<br>251860<br>_x1 | ENST00<br>0006077<br>07.1                      | 27 | 2E-10 | 54   | 1 | TGATGGCAATGATGATTTTTTACACTTATTGTTGTTACCTGATAACATAAATAT<br>GAGGGT                                                                                    |
| co3_10<br>252753<br>_x1 | CM0006<br>67.2/568<br>57140-<br>5685725<br>1   | 14 | 0.008 | 28.2 | 1 | AACATTTAATTGCAGTAATTCATAAGTGAATGATTGGGTTTTTCACATGCATGC<br>ATAAGATGTGCGTTTTCTCCAACCTTTGTTACAGTGTGAGCATGTTATCCTCATTT<br>GACA                          |
| co3_10<br>255235<br>_x1 | ENST00<br>0005165<br>43.1                      | 24 | 0.001 | 32.2 | 1 | TGGACAGACGCAAAAAACAAATCCTCATTGCAACCCAGAACTAATTGTTTA<br>GTATGAT                                                                                      |
| co3_10<br>258655<br>_x1 | ENST00<br>0003913<br>02.1                      | 15 | 0.006 | 30.2 | 1 | TGCCCTGACCTGGGAAGAGAGGGGCCTGGCTGGTGGTATCCATCTCATA<br>CAGCTAGGG                                                                                      |
| co3_10<br>261942<br>_x1 | ENST00<br>0003909<br>91.1                      | 15 | 0.003 | 30.2 | 1 | AATTGGGATCAAAGATGCAGCCGCCTTCCCATTTAAGCAGCACAGACAGCCC<br>AAAGTGAC                                                                                    |
| co3_10<br>262949<br>_x1 | CM0006<br>67.2/119<br>469055-<br>1194689<br>59 | 15 | 0.003 | 30.2 | 1 | ATACAATGAATAAAGTGTGATGACTGAGTGTTCACTCGTGTAAGATATGCC<br>TCCCTCAAACGTTGTCATGAAATAAGCACATTGCCCAACTGATA                                                 |
| co3_10<br>266412<br>_x1 | ENST00<br>0005167<br>41.1                      | 14 | 0.008 | 28.2 | 1 | AGGTCATTTCAAAGAAGGTTACGTGGCTGTGAGACCAAGAACGCTTAATGC<br>TGTTACCA                                                                                     |

|                         |                                                |    |        |      |   |                                                                                                                                                       |
|-------------------------|------------------------------------------------|----|--------|------|---|-------------------------------------------------------------------------------------------------------------------------------------------------------|
| co3_10<br>269083<br>_x1 | CM0006<br>64.2/156<br>410246-<br>1564101<br>44 | 14 | 0.009  | 28.2 | 1 | ATCCTTCTGTAGTTTATAAGCATGATGACTGAGTATTCACCCGCATGTGTGAG<br>ACGTGCTGCCCTTAAACTTTGTTATGGTGTACACACTGCTAGCCTGAAA                                            |
| co3_10<br>270133<br>_x1 | ENST00<br>0005834<br>96.1                      | 14 | 0.009  | 28.2 | 1 | TGTTGACCTGCCTCCGTCCTCTGTCTGTCCAGGGCTCCCGGGAGCCAGGGG<br>AGATGCTAC                                                                                      |
| co3_10<br>270347<br>_x1 | ENST00<br>0003912<br>88.1                      | 17 | 0.0005 | 34.2 | 1 | GCACCCCTTTAAGGCTGATGCAATGCTTTAAGAGGCTAACGCAGAAGGGTGA<br>AGCCAGTC                                                                                      |
| co3_10<br>271082<br>_x1 | CM0006<br>66.2/408<br>68970-<br>4086886<br>4   | 19 | 0.008  | 30.2 | 1 | ATCTTTTAGTAGTTCGTAAGCATGGTGATTGGCTTTTCATGTGCATGTGTGAAA<br>TGTGCCTTCCACAAACCTTGTTACAAAGTTGGCACACTACCATTGATGTGAAA                                       |
| co3_10<br>272949<br>_x1 | ENST00<br>0004088<br>76.1                      | 14 | 0.008  | 28.2 | 1 | TGCCCAGTGATGACACCATCCTTGCTCCCCGTGCCCCCAGGGGCTATGGG<br>CGACACCAT                                                                                       |
| co3_10<br>285387<br>_x1 | CM0006<br>65.2/470<br>88608-<br>4708874<br>7   | 15 | 0.003  | 30.2 | 1 | ATCCTTTATGGTTCATAAATATGATGAATGGGTTTTACAGCTGCTGTGTGAGAT<br>ATATCTCCTTCAAACCTTATATAATTTATATGTTATAATATATAATGACCTTTTTAT<br>GATGTCAGCATATGAATGACCCAGCTGATA |
| co3_10<br>285925<br>_x1 | CM0006<br>81.2/447<br>64976-<br>4476510<br>0   | 14 | 0.009  | 28.2 | 1 | ATGAACACTAGTCAAGCTAATTGTGCTCCTCTCCTCCTATGCAGTGGCGGCAA<br>ACAGCAGTGCCCTCAGTAGTATACGCAGCCTGCTGCGTGTAGCGGTGGCCTT<br>AAGAGACCTTGGAGATAGCC                 |
| co3_10<br>294448<br>_x1 | ENST00<br>0003649<br>39.1                      | 16 | 0.0005 | 32.2 | 1 | TCATCAGGTGGGATAATCTTTTCCTGTTCTTCCTTTTGGAGGACAGATTATAAC<br>ATGATT                                                                                      |
| co3_10<br>313284<br>_x1 | CM0006<br>65.2/175<br>739271-<br>1757393<br>76 | 15 | 0.002  | 30.2 | 1 | ATCCTTTTGTGGTTCATATTTGTGACGATTTCGGTTGTCAGGCCAATGTGTGAG<br>ATTTACCTCCTTCAAACCTTGTTAGCACATTGGCACATTTCAATTGTCTGACA                                       |

|                         |                                              |    |       |      |   |                                                                                                             |
|-------------------------|----------------------------------------------|----|-------|------|---|-------------------------------------------------------------------------------------------------------------|
| co3_10<br>315001<br>_x1 | ENST00<br>0005167<br>17.1                    | 15 | 0.004 | 30.2 | 1 | AAGACCCTTCAGCTGCAAACAACAGCTTCCTTGGTAGTTTATGCAGCCTGTTT<br>CTTGTAT                                            |
| co3_10<br>315048<br>_x1 | ENST00<br>0003909<br>77.2                    | 19 | 0.002 | 30.2 | 1 | ATACTGTGACAGTTGCATCGTTCAGCAGATTGAGTCACGAAGAGATGTATACC<br>ATCTGTC                                            |
| co3_10<br>336492<br>_x1 | ENST00<br>0003644<br>61.1                    | 15 | 0.006 | 30.2 | 1 | GGGTCAATGATGAGAACCCTATATTGTGTTGAAGAGAGGTGATGACTTAAAAT<br>TACCATG                                            |
| co3_10<br>369114<br>_x1 | ENST00<br>0003653<br>91.1                    | 14 | 0.008 | 28.2 | 1 | GGGTCAATGATGAGAACCCTTATATTGTCCTGAAGAGCGGTGATGACTTAAAAA<br>TCATGCT                                           |
| co3_10<br>369599<br>_x1 | ENST00<br>0005792<br>16.1                    | 14 | 0.009 | 28.2 | 1 | GCCGTGTGAGGCCACCTCTGCCATGCTGCAGGCTCCCCAGCACGCAGTGGG<br>GAACCCAAC                                            |
| co3_10<br>369974<br>_x1 | CM0006<br>80.2/381<br>1317-<br>3811420       | 14 | 0.009 | 28.2 | 1 | ATCCTTTTGTGGATCATAATCATAATGATTGAGTTTTACAGTAATATATGAGA<br>TGTGCTTCCTTCAAACCTTGTTATGATGTTGGCACACTATCCGTCTTACA |
| co3_10<br>378998<br>_x1 | ENST00<br>0005160<br>13.1                    | 15 | 0.003 | 30.2 | 1 | GTGCACATTGTTACATTGGGAGAAAAGATATTTCTGATGTGATGAATAAATTTT<br>TGGAGA                                            |
| co3_10<br>384031<br>_x1 | ENST00<br>0003910<br>82.1                    | 19 | 0.006 | 30.2 | 1 | ATAGCCAATCATTAGTATTCTGAGCTGTAGGAATCAAAGATTTTGATTAGATTC<br>TGTAAC                                            |
| co3_10<br>384818<br>_x1 | ENST00<br>0003648<br>40.1                    | 19 | 0.002 | 30.2 | 1 | TAGAACAACGATAACAAATAGTAGTGCAGGAGTCATAAACTATGAGTAATATG<br>TGTGTGG                                            |
| co3_10<br>385811<br>_x1 | ENST00<br>0003639<br>31.1                    | 16 | 0.001 | 32.2 | 1 | GGGTGGTGATGAGAACCCTTGATTCTTCTGAAGAGAGGTGATGACTTAAAAAC<br>CATGCTC                                            |
| co3_10<br>400973<br>_x1 | CM0006<br>72.2/295<br>75306-<br>2957538<br>1 | 18 | 0.009 | 28.2 | 1 | AGGCCAATGCTGAATTATTATCTTGACGAGAAATGATGACGTAAAAATTAAGC<br>TTAGTAGGATTACACTGAGGCC                             |

|                         |                                                |    |        |      |   |                                                                                                              |
|-------------------------|------------------------------------------------|----|--------|------|---|--------------------------------------------------------------------------------------------------------------|
| co3_10<br>402151<br>_x1 | CM0006<br>67.2/150<br>029452-<br>1500293<br>49 | 14 | 0.008  | 28.2 | 1 | ATCCTTTTATAGCTCACAAGTATGACAATCTGGTATTCATGCACATGGGTGAG<br>ATGTGCCTCCCTCAAACCTCATTATAACGTGAGCACATTACCCATTTGACA |
| co3_10<br>402483<br>_x1 | ENST00<br>0004589<br>08.1                      | 15 | 0.004  | 30.2 | 1 | TAGCACTGTTGCCTGAGCCATTGGTGCTCCCTGGTACTAGCTCAGTTTTAATG<br>CAGTGCA                                             |
| co3_10<br>409940<br>_x1 | ENST00<br>0005166<br>34.1                      | 14 | 0.008  | 28.2 | 1 | GATTCACAGCAGAAAGACAGCTAATCTAGTGTGCTAGCTGTAGAGCAAGTTTG<br>CTGCAAA                                             |
| co3_10<br>417757<br>_x1 | CM0006<br>66.2/185<br>946083-<br>1859461<br>86 | 16 | 0.0006 | 32.2 | 1 | ATCCTTTTGGGGTTGATAGGTGTGATGATTGGGTTTCTATGCATGTGTGTGAC<br>ATGTGTCTCCCTCAAAGCTTGTTACCACATCCGTACAGCACCCATAGGATG |
| co3_10<br>420620<br>_x1 | ENST00<br>0003632<br>05.1                      | 16 | 0.0006 | 32.2 | 1 | AGGATATATCAAAGAGACTTTCTGGGGCTGGGAAACCAGGATCTCGTAATGC<br>TATGACCA                                             |
| co3_10<br>421255<br>_x1 | ENST00<br>0003643<br>93.1                      | 22 | 0.0001 | 36.2 | 1 | TGGATCAATGATGTCCACTGGTGGCGTATAAATCATATTTGGTGAATATATGT<br>CTGGAAC                                             |
| co3_10<br>423027<br>_x1 | ENST00<br>0005162<br>13.1                      | 17 | 0.0001 | 34.2 | 1 | CCACACAGGACGAAGGGTAGATATACTTGTACCAAATGAATGTTTCAGCAATCT<br>GAGATAA                                            |
| co3_10<br>431164<br>_x1 | ENST00<br>0003650<br>75.1                      | 15 | 0.005  | 30.2 | 1 | CTACAGCCAACTCAGCTGGCTGAGTTCCTCGCCTCATGGGGGACGTGTGCAA<br>TGGCTGCA                                             |
| co3_10<br>431979<br>_x1 | ENST00<br>0003637<br>23.1                      | 19 | 0.004  | 30.2 | 1 | GGGTCAATGATGAGAACCGTATATTGTCCTGAAGAGCGGTGATGACTTAAAAA<br>TAATGCT                                             |
| co3_10<br>436715<br>_x1 | ENST00<br>0004589<br>53.1                      | 15 | 0.005  | 30.2 | 1 | AAGCATGGCACACTGGATGGGCGTTCTGCTTCTCTTTAAAGAGCATGGATTTA<br>TCCATAC                                             |

|                         |                                              |    |        |      |   |                                                                                                            |
|-------------------------|----------------------------------------------|----|--------|------|---|------------------------------------------------------------------------------------------------------------|
| co3_10<br>463514<br>_x1 | ENST00<br>0005160<br>69.1                    | 15 | 0.003  | 30.2 | 1 | TTATATTAGTGATGGCTTTTAAAGTTCTCACAGACAGGCATCTCTCTGAAAGAC<br>AGCGAA                                           |
| co3_10<br>464412<br>_x1 | ENST00<br>0005168<br>31.1                    | 41 | 0.0005 | 34.2 | 1 | TAGTGTGGAAGTGTCTACTCCTCATTCTGTGGAAGCAGGAATACATTCATAA<br>CATGCTC                                            |
| co3_10<br>467234<br>_x1 | ENST00<br>0005163<br>95.1                    | 36 | 0.001  | 32.2 | 1 | ATGACCTGTGAAACCAAGGGCTCCTAATGCTATGACCAAAGACTGAAGCTCT<br>CTATGAGA                                           |
| co3_10<br>468026<br>_x1 | CM0006<br>79.2/181<br>46552-<br>1814665<br>1 | 15 | 0.003  | 30.2 | 1 | ATTCTTTTATAGTTTATAAGTGTGATGATTGAGTTTTTCATGCTCAGGCATGAGA<br>TGTGTCACCCTCAAACCTTGCTAAAACATCAGCACAAAGACCAGACG |
| co3_10<br>469588<br>_x1 | ENST00<br>0003909<br>82.1                    | 15 | 0.003  | 30.2 | 1 | TCAATAATGAAATCTTCTGATTTGGTGAGAAATAATGCCTTAAATTACTCA<br>ATAGGA                                              |
| co3_10<br>470423<br>_x1 | CM0006<br>72.2/996<br>01780-<br>9960188<br>0 | 19 | 0.002  | 30.2 | 1 | ATCCTTTTGTAGCCCGTGAACATGATGATTTGGGTTTTTCACACACATGTGAGA<br>TGTGCCTCCTTCAAACCTTAAGACATCAGCATGTTACCTGACGTGAAA |
| co3_10<br>471981<br>_x1 | CM0006<br>81.2/383<br>49110-<br>3834900<br>9 | 15 | 0.003  | 30.2 | 1 | ATCTTCTTGTAGTTTCTACGTGTGGCGATTGGGTTTTTCACCGTCATCTGAGAT<br>GTGTCTCCCTCAAGCCTTGTTATGGTGTGCGCCCATACCTGTCTGACA |
| co3_10<br>474175<br>_x1 | ENST00<br>0004110<br>95.1                    | 20 | 0.0007 | 32.2 | 1 | CCTCATTTTCTTGGCAGGAACTTGTAGTCCCACTCCCTGTTATGTACAGAGGC<br>AAAGGGA                                           |
| co3_10<br>486821<br>_x1 | CM0006<br>77.2/457<br>10815-<br>4571087<br>3 | 14 | 0.008  | 28.2 | 1 | AGAGTGCTGGTGGCTGATGAGCCCAGGGCTGCTCTTGCTCACTTTGCTGACA<br>GCACTCG                                            |

|                         |                                              |    |       |      |   |                                                                                                               |
|-------------------------|----------------------------------------------|----|-------|------|---|---------------------------------------------------------------------------------------------------------------|
| co3_10<br>486979<br>_x1 | AL13270<br>9.5/1425<br>97-<br>142509         | 18 | 0.009 | 28.2 | 1 | UGGACUGUUGAUGACAAGUGGGUGGCUUAUGUGGUUGUACAUGCUGGUUGU<br>AUAUGAAGAAUAAUUAUCAUAUCUGAAACUUUGAGGUCCAA              |
| co3_10<br>516611<br>_x1 | ENST00<br>0003646<br>72.1                    | 14 | 0.009 | 28.2 | 1 | AAGGCAGCATTGTTGTAGATGATTTGAAAGATTTTAAAAGGTATAAGCTCACA<br>AGTGTAG                                              |
| co3_10<br>521466<br>_x1 | ENST00<br>0003911<br>30.1                    | 14 | 0.009 | 28.2 | 1 | GCCATGATGCTCTTCGGTTTAGGAGCAATTAATGACTACAGATTGGTGGCA<br>GTTTATG                                                |
| co3_10<br>533341<br>_x1 | CM0006<br>82.2/357<br>16471-<br>3571657<br>0 | 14 | 0.008 | 28.2 | 1 | AAATTTTAGGAGTACCTAAGTGTGATGATTTGGTTTTTACATTCATGTGTGAGC<br>TGTGCCTGCCTTTTGTACAAGGGCATATTACCCTTTGTTGTGAAA       |
| co3_10<br>534332<br>_x1 | ENST00<br>0005170<br>95.1                    | 16 | 0.001 | 32.2 | 1 | TCACATTTTATCAACCAAATGAATTAGGGAAAAAAGTTCATGCCCAGGGGTGA<br>GACTATA                                              |
| co3_10<br>548984<br>_x1 | CM0006<br>63.2/111<br>69613-<br>1116950<br>7 | 14 | 0.009 | 28.2 | 1 | ATCCTTTTGTATACATTTATGCATGATGATTGGTTTTTACCATCACATGTGGT<br>GAGATGTGTCTCCCTCAAATTGTTATCACGTCAGCATGTGATCAGTCTGACA |
| co3_10<br>549560<br>_x1 | ENST00<br>0005170<br>15.1                    | 39 | 0.006 | 30.2 | 1 | CATCTCCTATCAGTCAGGGATGAAGCAATCCCTTGTTTCATCCCCAGCTTGGCT<br>TTTGATC                                             |
| co3_10<br>559256<br>_x1 | ENST00<br>0003633<br>67.1                    | 15 | 0.005 | 30.2 | 1 | CTACAGATATTTTCTGAATTGGCAAGTCCACCAAGAACTATAAAAATGTGTGT<br>GTGCAA                                               |
| co3_10<br>564810<br>_x1 | ENST00<br>0004106<br>72.2                    | 14 | 0.009 | 28.2 | 1 | TACTTCCAACCTCTAGGATAGCATCATGCAATAAGAAAAGTATGACAGAGGTAC<br>CCATTCC                                             |
| co3_10<br>568728<br>_x1 | ENST00<br>0004087<br>92.1                    | 19 | 0.007 | 30.2 | 1 | GCCGAGACTAAGTCGCATGCTGACACAGCTCTTGGTGTGCTACGGTACTTGG<br>AGAGAATC                                              |

|                         |                                                |    |        |      |   |                                                                                                              |
|-------------------------|------------------------------------------------|----|--------|------|---|--------------------------------------------------------------------------------------------------------------|
| co3_10<br>574026<br>_x1 | ENST00<br>0005166<br>64.1                      | 15 | 0.005  | 30.2 | 1 | ACCCAGGGGGTTCCCTCTCAGGGGACAGTTCGTATACTCAAGAATGTGGCCA<br>CTTGGAGA                                             |
| co3_10<br>598609<br>_x1 | ENST00<br>0005161<br>13.1                      | 16 | 0.0006 | 32.2 | 1 | ATGCATCTTAGAACATCCAGGAGACAGTCTTCTAAAATACCAGTGAGTGGCAA<br>GATATGA                                             |
| co3_10<br>606757<br>_x1 | ENST00<br>0004593<br>39.1                      | 15 | 0.004  | 30.2 | 1 | CTGTGTGTAGAAATGTTTGCTCCTCTATCCTTTGGGAACAGGAATACATTCAT<br>AACATGC                                             |
| co3_10<br>618223<br>_x1 | CM0006<br>79.2/797<br>13731-<br>7971382<br>6   | 14 | 0.008  | 28.2 | 1 | ATCCTTCTGTGGCTGATATGTGTGATGAGGGGGTTTTTCACACTCTTGCGTGG<br>GACGTGAAACGTCTTTAGAACAGTGGCACGTTACCTGTCTTACA        |
| co3_10<br>630550<br>_x1 | ENST00<br>0003645<br>40.1                      | 15 | 0.004  | 30.2 | 1 | AAATGTTATGATATGAGCAAAATGTTCAACTATTCCAAATGGGCTGAGTGAAA<br>ATAGGTT                                             |
| co3_10<br>631794<br>_x1 | CM0006<br>80.2/229<br>01626-<br>2290152<br>4   | 15 | 0.005  | 30.2 | 1 | GTTCTTTTGTGTTTCATAAAGTAATGATTGTGTTTTTCACATTATTGTGTGAGGT<br>GTGCCTCCCTCAGACCTTGATACCAGTCTGCACATTACCTGATGTGAAG |
| co3_10<br>657483<br>_x1 | ENST00<br>0003623<br>26.1                      | 15 | 0.002  | 30.2 | 1 | AGATAACTTCAAAGAGGGCTTGCGGAGCTGCAAACCAAGAGCTTTTAATGTA<br>TACTGA                                               |
| co3_10<br>658573<br>_x1 | CM0006<br>65.2/101<br>201832-<br>1012019<br>35 | 15 | 0.007  | 30.2 | 1 | ATTCTTTTGTGGTTTATAAGCATAATGGTTGGGTTTTTATATGCATGTGTGAAA<br>TGTA CTCCCTCAAACCTTGTTACAATGTCAGCACATTACCCACCTGACA |
| co3_10<br>660956<br>_x1 | CM0006<br>65.2/197<br>339551-<br>1973394<br>57 | 16 | 0.0007 | 32.2 | 1 | AGTCTTTTGTAGTTTGCAAGCATGATGATTCGGTTTTGAGAGGTGCCTCCCTC<br>AAACCTTG TAGACGTCGTCATCGGCACATTACCTGCCTGATG         |

|                         |                                              |    |        |      |   |                                                                                                              |
|-------------------------|----------------------------------------------|----|--------|------|---|--------------------------------------------------------------------------------------------------------------|
| co3_10<br>671950<br>_x1 | ENST00<br>0006071<br>53.1                    | 19 | 0.004  | 30.2 | 1 | AGGTGATTTCAAAAAGGACTTGTGGGCTGTGAATCCAGGCACTCAACACTTTG<br>AAAGTCT                                             |
| co3_10<br>697710<br>_x1 | ENST00<br>0004590<br>14.1                    | 31 | 3E-10  | 54   | 1 | GTTGGTTGAAAATCACCCCGGTTTTGGCCGTGGCCGCGGGTGAAATTCGGC<br>GCGCAAGA                                              |
| co3_10<br>698029<br>_x1 | CM0006<br>64.2/649<br>08686-<br>6490858<br>7 | 15 | 0.003  | 30.2 | 1 | ATCCTTTTGCAGTTATGCATAATGACTGGGTTTTACGCTTATGAATGAGATGT<br>GCCTCCCTCAAACATTGTTATATGTCAGCACATTATGCATCTGACA      |
| co3_10<br>707122<br>_x1 | ENST00<br>0003912<br>63.1                    | 16 | 0.0005 | 32.2 | 1 | GTCGCACTTAAACTTAAGACTCTTTTTCTTGCAGCAGTGGTTTAAACAGAGGA<br>ACAAACA                                             |
| co3_10<br>726530<br>_x1 | ENST00<br>0005170<br>79.1                    | 19 | 1E-05  | 38.2 | 1 | ATGCCTCTATTTGACACATGAAACAGTTACTGCCTGCTGCTATGGTTTCCACT<br>ACAGATG                                             |
| co3_10<br>735735<br>_x1 | ENST00<br>0005163<br>61.2                    | 14 | 0.008  | 28.2 | 1 | TGGACCAATGATGAGAGCATGTCACAAAACAAGGCTTATGATTAATCCAGTTC<br>TGACAC                                              |
| co3_10<br>742577<br>_x1 | ENST00<br>0004110<br>34.1                    | 15 | 0.002  | 30.2 | 1 | AGTTCCTTGGAAGTTAAAGGTTAAGCTTAAGGACTGATTCAAAGGCAGGTGCA<br>AAAAATA                                             |
| co3_10<br>757644<br>_x1 | CM0006<br>79.2/674<br>07946-<br>6740784<br>3 | 14 | 0.009  | 28.2 | 1 | ATCCTTTTGTGGTTCACAAGCACAGCGATTGGGTTTTCACACTCATGTCTGAG<br>ATGTGCCGCTCTCAAACCTTACTATGACATCAGCACATTGCCTATCTGATG |
| co3_10<br>766965<br>_x1 | ENST00<br>0005160<br>29.1                    | 20 | 0.0007 | 32.2 | 1 | CTTCTGCTAAGGTTTACACTATAGATGCAGGAAAAAATGTCCTCACACTGT<br>CTGTCTG                                               |
| co3_10<br>771144<br>_x1 | ENST00<br>0003911<br>09.1                    | 16 | 0.001  | 32.2 | 1 | AGGCCAATGCTGAATTATTATCTTGACGAGAAATGATGACGTAAAAATTAAGC<br>TTAGTAG                                             |

|                         |                                                |    |        |      |   |                                                                                                           |
|-------------------------|------------------------------------------------|----|--------|------|---|-----------------------------------------------------------------------------------------------------------|
| co3_10<br>775197<br>_x1 | ENST00<br>0003642<br>63.1                      | 16 | 0.0007 | 32.2 | 1 | CTATCAAAGTTACTTTTTGTGGGGTGAAGTTTTTAAAATAACCTTTACCTAC<br>GTGGGC                                            |
| co3_10<br>805386<br>_x1 | ENST00<br>0005163<br>03.1                      | 15 | 0.002  | 30.2 | 1 | GTGTTTAGAAGACCACATCTTCATCCTGAAAGCACAGATGTGTGGAAACCAAT<br>GACCGAG                                          |
| co3_10<br>815734<br>_x1 | CM0006<br>64.2/179<br>125637-<br>1791255<br>36 | 15 | 0.006  | 30.2 | 1 | ATCCTTTTGTAGTTTATAAGCATGATGATGGGTGCTCACACTCATCTGAGATG<br>TGCTCCCTCTAAGCCTTGTAACAACATCAGCACGTTACCCTTCTGATG |
| co3_10<br>818840<br>_x1 | ENST00<br>0005163<br>49.1                      | 16 | 0.0008 | 32.2 | 1 | TTGTGGGTATAACATTCACTATATTAAGATCATGCATGTGCCCCAAACCTAAT<br>TCTTTT                                           |
| co3_10<br>851764<br>_x1 | ENST00<br>0003912<br>27.1                      | 15 | 0.007  | 30.2 | 1 | CCTCGCTTTCTTTGCAGGGAGCAGGTATGTATGTTCCCTATTATGTCTGGAGG<br>CAGAGGG                                          |
| co3_10<br>860635<br>_x1 | ENST00<br>0005164<br>21.1                      | 15 | 0.006  | 30.2 | 1 | TTCCAGAATTACGGGTTTGACAAACCAAACATTCATTATTTTCTCTCTAGAG<br>AGAGTT                                            |
| co3_10<br>861041<br>_x1 | ENST00<br>0003912<br>65.1                      | 14 | 0.009  | 28.2 | 1 | CCTCCTTTTCTTGTCAGGGACTGAGTGTGTGGTCCTGCTCCTGTTATGTATGG<br>AGGCAA                                           |
| co3_10<br>872963<br>_x1 | ENST00<br>0004102<br>13.1                      | 14 | 0.009  | 28.2 | 1 | TCAGCTTGAGTCACTCTTCCCAGGCTTTATCCAGGTGGCTTAGGTTAGCTAGG<br>GCTGTGT                                          |
| co3_10<br>878069<br>_x1 | ENST00<br>0005172<br>04.1                      | 19 | 0.004  | 30.2 | 1 | ATGCACCCATTTGACTAACTTGCAGCAGCTAATGTCTGCTGCCAAGGTTTCCT<br>CTCCAGA                                          |
| co3_10<br>893412<br>_x1 | ENST00<br>0005169<br>65.1                      | 16 | 0.001  | 32.2 | 1 | TTACCTTGAATACATACAGATACTTCTGTTACTCTCTAGCTTAAGAACCTTTA<br>ATGTGG                                           |

|                         |                                                |    |        |      |   |                                                                                                            |
|-------------------------|------------------------------------------------|----|--------|------|---|------------------------------------------------------------------------------------------------------------|
| co3_10<br>899850<br>_x1 | ENST00<br>0004593<br>26.1                      | 16 | 0.001  | 32.2 | 1 | GCCCAGGGTATGTTACAGGGGCGATGCTGCCCTCCCAGCTGGCCCATGGGT<br>GACCCTGGG                                           |
| co3_10<br>905384<br>_x1 | ENST00<br>0005159<br>21.1                      | 17 | 0.0003 | 34.2 | 1 | CTATCTAGCAAAAATTTGGTTTAGAGGGAAAGTTTATAGTAGACTTTGCCAGCT<br>GAAGTTG                                          |
| co3_10<br>948961<br>_x1 | ENST00<br>0003910<br>78.1                      | 15 | 0.007  | 30.2 | 1 | GGGGCAATATGGAGATGTTATATTGTCTTCGACAGGGAAGATGACATAAAAAT<br>TATGTTC                                           |
| co3_10<br>957393<br>_x1 | ENST00<br>0003645<br>23.1                      | 14 | 0.009  | 28.2 | 1 | CCCTATATTCGAAAGTTATCCTGGTCATTGACAGTGCAGGGAGAGAAACTGCT<br>GAAAGCA                                           |
| co3_10<br>961095<br>_x1 | ENST00<br>0003653<br>06.1                      | 16 | 0.0005 | 32.2 | 1 | GGGTCAATGAGAACCTTATATTGTCCTGAAGAGAGGTGATAACTTAAAAATCA<br>TGCTCAA                                           |
| co3_11<br>015004<br>_x1 | CM0006<br>67.2/133<br>850957-<br>1338508<br>57 | 14 | 0.009  | 28.2 | 1 | ATCTTTTGTGTTTCCTAAGTGTGATGATTGAGTTTTCAAACCTCACTTGAGGTGT<br>GCCTCCCTTAAACCTCATTATGACATCAGCATATTACCCATCTGACG |

---
